# Supplementary material for: Characterising a healthy adult with a rare HAO1 knockout to support a therapeutic strategy for primary hyperoxaluria
Source: eLife. 2020 Mar 24;9:e54363. doi: 10.7554/eLife.54363 (PMC7108859; doi:10.7554/eLife.54363)
Supplement: Supplementary file 1. [file elife-54363-supp1.xlsx]

## Sheet: ScaledImpData ANALYSIS
													SAMPLE NAME	QMUL-00246	QMUL-00247		QMUL-00246 & QMUL-00247
													PARENT SAMPLE ID	6026007	6026008		6026007 & 6026008
													CLIENT IDENTIFIER	S00005-001	S00005-001		S00005-001					HAO1 knockout vs 27 control samples
													ORIG ORDER	23	24		HAO1 knockout individual		25 control individuals	25 control individuals
													SPL AMNT	250ul	250ul		p.Leu333SerfsTer4		(see ScaledImpData INDIVIDUAL for full data)
													SPL TYPE	Plasma	Plasma
PATHWAY SORTORDER	BIOCHEMICAL	SUPER PATHWAY	SUB PATHWAY	Comments	COMP ID	PLATFORM	CHEMICAL ID	RI	MASS	PUBCHEM	CAS	KEGG	Group HMDB	QMUL-00246	QMUL-00247		mean (of 2 replicate aliquots from 1 individual)		mean (of 25 individuals)	SD (of 25 individuals)		fold SD (of 2 individuals): HAO1 knockout mean versus 25 controls mean
1016	DSGEGDFXAEGGGVR*	Peptide	Fibrinogen Cleavage Peptide		31548	LC/MS Neg	100001323	2535	731.317					1	1		1		1	0		(not tested, no variability across samples)
5015	pioglitazone	Xenobiotics	Drug - Metabolic		33139	LC/MS Pos Early	100001317	3240	357.127	4829	112529-15-4	C07675	HMDB15264	1	1		1		1	0		(not tested, no variability across samples)
5006	omeprazole	Xenobiotics	Drug - Gastrointestinal		38600	LC/MS Neg	100002725	4673	344.107	4594	73590-58-6	C07324	HMDB01913	1	1		1		1	0		(not tested, no variability across samples)
5130	fexofenadine	Xenobiotics	Drug - Respiratory		42021	LC/MS Pos Late	100004018	944	502.295	3348	83799-24-0	C06999	HMDB05030	1	1		1		1	0		(not tested, no variability across samples)
5016	ketopioglitazone	Xenobiotics	Drug - Metabolic		43579	LC/MS Neg	100004176	4165	369.091		146062-45-5			1	1		1		1	0		(not tested, no variability across samples)
5017	hydroxypioglitazone (M-IV)	Xenobiotics	Drug - Metabolic		43580	LC/MS Pos Late	100004177	665	373.122		146062-44-4			1	1		1		1	0		(not tested, no variability across samples)
5020	sitagliptin	Xenobiotics	Drug - Metabolic		52954	LC/MS Neg	100008964	4485	468.111	11306691	486460-32-6			1	1		1		1	0		(not tested, no variability across samples)
4882	fluconazole	Xenobiotics	Drug - Antibiotic		57707	LC/MS Neg	100015972	3564	305.097	3365	86386-73-4	D00322	HMDB14342	1	1		1		1	0		(not tested, no variability across samples)
1008	ADSGEGDFXAEGGGVR*	Peptide	Fibrinogen Cleavage Peptide		57709	LC/MS Neg	100001322	2474	766.835	16133137	25422-31-5			1	1		1		1	0		(not tested, no variability across samples)
1017	ADpSGEGDFXAEGGGVR*	Peptide	Fibrinogen Cleavage Peptide		57712	LC/MS Neg	100001324	2016	806.818		886023-52-5			1	1		1		1	0		(not tested, no variability across samples)
1013	Fibrinopeptide A (5-16)*	Peptide	Fibrinogen Cleavage Peptide		62148	LC/MS Neg	100020274	2850	601.778					1	1		1		1	0		(not tested, no variability across samples)
1031	Fibrinopeptide B (1-13)	Peptide	Fibrinogen Cleavage Peptide		62813	LC/MS Neg	100020908	2482	696.772					1	1		1		1	0		(not tested, no variability across samples)
5297	glycolate (hydroxyacetate)	Xenobiotics	Chemical	known HAO1 substrate, product is glyoxylate	15737	LC/MS Polar	203	1790.4	159.011	757	79-14-1	C00160	HMDB00115	80.9895	84.3399		82.6647		0.923988	0.498081		164.111
3133	ursodeoxycholate	Lipid	Secondary Bile Acid Metabolism		1605	LC/MS Neg	1135	5055	391.285	31401	128-13-2	C07880	HMDB00946	24.8594	24.9331		24.8963		1.03235	0.803295		29.7075
300	alpha-hydroxyisocaproate	Amino Acid	Leucine, Isoleucine and Valine Metabolism	4 carbon chain, potential HAO1 substrate, product would be 4-methyl-2-oxopentanoate, which is reduced in the HAO1 knockout woman	22132	LC/MS Neg	100000706	1840	131.071	83697	10303-64-7	C03264	HMDB00746	7.0988	6.7717		6.93525		1.06808	0.396734		14.7887
3087	cholate	Lipid	Primary Bile Acid Metabolism		22842	LC/MS Neg	136	5165	407.28	221493	81-25-4	C00695	HMDB00619	25.4587	24.418		24.9383		1.6269	2.00405		11.6322
3142	glycoursodeoxycholate	Lipid	Secondary Bile Acid Metabolism		39379	LC/MS Neg	100002911	5033	448.307	12310288	64480-66-6		HMDB00708	8.5285	8.1057		8.3171		0.979244	0.757949		9.6812
425	homocitrulline	Amino Acid	Urea cycle; Arginine and Proline Metabolism		22138	LC/MS Polar	100000963	3006.8	188.104	65072	1190-49-4	C02427	HMDB00679	4.9555	4.6417		4.7986		1.04075	0.395612		9.49882
3090	chenodeoxycholate	Lipid	Primary Bile Acid Metabolism		1563	LC/MS Neg	1123	5264	391.285	10133	474-24-9;474-25-9	C02528	HMDB00518	7.7548	7.4812		7.618		0.992336	0.819068		8.08927
1598	methylmalonate (MMA)	Lipid	Fatty Acid Metabolism (also BCAA Metabolism)		1496	LC/MS Polar	418	3078.4	117.019	487	516-05-2	C02170	HMDB00202	5.4352	5.4704		5.4528		1.0399	0.551064		8.00795
3144	glycoursodeoxycholic acid sulfate (1)	Lipid	Secondary Bile Acid Metabolism		63731	LC/MS Neg	100020819	4309	263.628					8.2736	8.1278		8.2007		1.25338	1.0846		6.4054
314	beta-hydroxyisovaleroylcarnitine	Amino Acid	Leucine, Isoleucine and Valine Metabolism		35433	LC/MS Pos Early	100001594	2584	262.165		99159-87-2			2.8632	2.6013		2.73225		1.11636	0.309555		5.22003
4069	benzoate	Xenobiotics	Benzoate Metabolism		15778	LC/MS Neg	100000008	1750	121.029	243	65-85-0	C00180	HMDB01870	0.9262	2.5809		1.75355		0.98566	0.147182		5.2173
5349	2-methoxyresorcinol sulfate	Xenobiotics	Chemical		48445	LC/MS Neg	100006184	1863	218.997		1446269-78-8			8.4239	8.3477		8.3858		0.830756	1.44967		5.21155
2233	1-stearoyl-2-arachidonoyl-GPS (18:0/20:4)	Lipid	Phosphatidylserine (PS)		52235	LC/MS Pos Late	100001872	2565	812.544				HMDB12383	3.9671	3.469		3.71805		0.930916	0.568639		4.90141
3137	isoursodeoxycholate	Lipid	Secondary Bile Acid Metabolism		57577	LC/MS Neg	100002488	4809	391.285	127601	78919-26-3	C17662	HMDB00686	9.0898	9.0134		9.0516		1.55805	1.55233		4.8273
5347	1,2,3-benzenetriol sulfate (2)	Xenobiotics	Chemical		48762	LC/MS Neg	100006374	1709	204.981					27.5965	28.68		28.1382		3.08162	5.20422		4.81468
2847	sphingosine	Lipid	Sphingosines		17747	LC/MS Pos Late	297	1393	300.29	5353955	123-78-4	C00319	HMDB00252	2.9247	2.2918		2.60825		1.05473	0.330956		4.69403
1729	alpha-hydroxycaproate	Lipid	Fatty Acid, Monohydroxy	6 carbon chain, potential HAO1 substrate, product would be 2-Ketohexanoic acid	37073	LC/MS Neg	100001723	1920	131.071	99824	6064-63-7		HMDB01624	2.9784	2.5582		2.7683		0.874232	0.413062		4.58543
2230	1-stearoyl-2-oleoyl-GPS (18:0/18:1)	Lipid	Phosphatidylserine (PS)		19265	LC/MS Pos Late	100000639	3000	790.559	9547087			HMDB10163	3.0209	2.4121		2.7165		0.968416	0.38533		4.53659
3944	pantoate	Cofactors and Vitamins	Pantothenate and CoA Metabolism	4 carbon chain, potential HAO1 substrate, product would be ketopantoate	63061	LC/MS Neg	100002613	1143	147.066	439251	470-29-1	C00522		2.6871	2.3653		2.5262		0.935808	0.357104		4.45358
389	cystathionine	Amino Acid	Methionine, Cysteine, SAM and Taurine Metabolism		15705	LC/MS Pos Early	310	2270	223.075	439258	535-34-2	C02291	HMDB00099	2.7706	2.9947		2.88265		1.03793	0.424746		4.34312
4122	3-methoxycatechol sulfate (1)	Xenobiotics	Benzoate Metabolism		48763	LC/MS Neg	100006375	2163	218.997					13.6196	13.1037		13.3617		1.78946	2.81422		4.11204
259	serotonin	Amino Acid	Tryptophan Metabolism		2342	LC/MS Pos Early	504	2550	177.102	5202	153-98-0	C00780	HMDB00259	2.7943	2.7853		2.7898		0.994264	0.440582		4.07537
	X - 17685				48025	LC/MS Neg		2575	233.013					15.9746	15.6194		15.797		1.92732	3.53373		3.92494
385	2-hydroxy-4-(methylthio)butanoic acid	Amino Acid	Methionine, Cysteine, SAM and Taurine Metabolism	4 carbon chain, potential HAO1 substrate, product would be 2-keto-4-methylthiobutyric acid	63739	LC/MS Polar	100021372	1065	149.028		583-91-5			2.2686	2.025		2.1468		0.93054	0.312677		3.88983
	X - 25656				63332	LC/MS Pos Early		2524.8	432.28					1.8137	2.3389		2.0763		0.904468	0.31095		3.76856
1172	sucrose	Carbohydrate	Disaccharides and Oligosaccharides		1519	LC/MS Neg	935	865	341.109	5988	57-50-1	C00089	HMDB00258	5.3856	5.4983		5.44195		1.03292	1.22002		3.6139
	X - 23314				49704	LC/MS Pos Early		1132	226.128					4.9904	4.4547		4.72255		0.778688	1.13032		3.48916
3138	isoursodeoxycholate sulfate (1)	Lipid	Secondary Bile Acid Metabolism		63602	LC/MS Neg	100021647	4082	235.118					4.1264	4.2273		4.17685		0.916656	0.96523		3.37763
2849	sphingosine 1-phosphate	Lipid	Sphingosines		34445	LC/MS Pos Late	100000626	1375	380.256	5283560	26993-30-6	C06124	HMDB00277	1.5478	1.3905		1.46915		0.969248	0.15375		3.25141
1980	phosphoethanolamine (PE)	Lipid	Phospholipid Metabolism		1600	LC/MS Pos Early	1026	700	142.026	1015	1071-23-4	C00346	HMDB00224	1.7995	1.8074		1.80345		0.994424	0.258348		3.13154
1146	maltose	Carbohydrate	Glycogen Metabolism		15586	LC/MS Polar	913	3329.4	387.114	10991489	6363-53-7	C00208	HMDB00163	2.4885	2.8929		2.6907		1.01656	0.573166		2.92087
3976	gamma-CEHC	Cofactors and Vitamins	Tocopherol Metabolism		44876	LC/MS Neg	100002094	3843	263.129	133098	178167-75-4		HMDB01931	2.9883	2.8568		2.92255		1.0793	0.657119		2.80505
168	3-(4-hydroxyphenyl)lactate (HPLA)	Amino Acid	Tyrosine Metabolism		32197	LC/MS Neg	240	1379	181.051	9378	6482-98-0	C03672	HMDB00755	1.8587	1.7524		1.80555		1.03399	0.293167		2.6318
2931	17alpha-hydroxypregnenolone 3-sulfate	Lipid	Pregnenolone Steroids		37482	LC/MS Neg	100002128	4800	411.185	152971	28901-70-4		HMDB00416	3.6749	3.4138		3.54435		1.09335	0.931523		2.63117
	X - 23739				49637	LC/MS Pos Early		1286	262.103					1.8629	1.7379		1.8004		0.993108	0.30864		2.61565
2697	sphinganine-1-phosphate	Lipid	Sphingolipid Synthesis		52605	LC/MS Pos Late	100001876	1431	382.272	520	19794-97-9		HMDB01383	1.5855	1.3675		1.4765		0.961316	0.200759		2.56618
4158	3,7-dimethylurate	Xenobiotics	Xanthine Metabolism		34399	LC/MS Neg	100001398	1418	195.052	83126	13087-49-5	C16360	HMDB01982	1.6623	1.4346		1.54845		0.926016	0.244993		2.54062
401	lanthionine	Amino Acid	Methionine, Cysteine, SAM and Taurine Metabolism		42002	LC/MS Pos Early	100003892	1730	209.059	98504	3183-08-02			2.2817	1.9168		2.09925		1.08029	0.43229		2.35713
109	N6,N6,N6-trimethyllysine	Amino Acid	Lysine Metabolism		1498	LC/MS Pos Early	189	2825	189.16	440120	23284-33-5	C03793	HMDB01325	1.792	1.7233		1.75765		1.02416	0.326046		2.24966
418	ornithine	Amino Acid	Urea cycle; Arginine and Proline Metabolism		1493	LC/MS Pos Early	444	2800	133.097	6262	3184-13-2	C00077	HMDB03374	1.3439	1.363		1.35345		0.971044	0.176511		2.16648
35	aspartate	Amino Acid	Alanine and Aspartate Metabolism		443	LC/MS Pos Early	234	1165	134.045	5960	56-84-8	C00049	HMDB00191	1.4991	1.3991		1.4491		0.970912	0.222423		2.1499
406	taurine	Amino Acid	Methionine, Cysteine, SAM and Taurine Metabolism		2125	LC/MS Pos Early	512	660	126.022	1123	107-35-7	C00245	HMDB00251	1.5121	1.3737		1.4429		0.958448	0.229577		2.1102
2981	corticosterone	Lipid	Corticosteroids		5983	LC/MS Neg	272	5040	345.207	5753	50-22-6	C02140	HMDB01547	3.8052	4.0662		3.9357		1.1849	1.31458		2.09254
5343	4-hydroxychlorothalonil	Xenobiotics	Chemical		48441	LC/MS Neg	100006082	4427	244.908	34217	28343-61-5			2.4127	2.4564		2.43455		1.01885	0.685932		2.06391
4694	vanillic acid glycine	Xenobiotics	Food Component/Plant		63853	LC/MS Neg	100021363	1682	224.056	3083688			HMDB60026	1.811	1.6398		1.7254		0.760584	0.472842		2.04046
	X - 12798				46624	LC/MS Pos Early		2011	240.102					2.1065	1.8258		1.96615		0.72396	0.616935		2.01349
4404	ferulic acid 4-sulfate	Xenobiotics	Food Component/Plant		47114	LC/MS Polar	100005389	1255	273.007	6305574	86321-29-1		HMDB29200	2.0387	1.8982		1.96845		0.5559	0.704786		2.00423
2987	cortisol	Lipid	Corticosteroids		1712	LC/MS Neg	356	4710	361.202	5754	50-23-7	C00735	HMDB00063	2.0786	2.1636		2.1211		1.07864	0.529873		1.96738
236	C-glycosyltryptophan	Amino Acid	Tryptophan Metabolism		48782	LC/MS Neg	100006379	1777	365.135	10981970	180509-18-6			1.4335	1.3757		1.4046		1.0511	0.183288		1.92866
2306	1-linoleoyl-GPA (18:2)*	Lipid	Lysophospholipid		52690	LC/MS Polar	100009082	1441	433.236				HMDB07856	1.6418	1.5703		1.60605		0.844064	0.403211		1.88979
240	kynurenine	Amino Acid	Tryptophan Metabolism		15140	LC/MS Pos Early	100000265	2739	209.092	161166	2922-83-0	C00328	HMDB00684	1.2477	1.2546		1.25115		0.96404	0.152313		1.885
	X - 23648				49525	LC/MS Pos Early		1656	262.103					2.3068	1.8825		2.09465		0.777432	0.69903		1.88435
110	hydroxy-N6,N6,N6-trimethyllysine*	Amino Acid	Lysine Metabolism		62959	LC/MS Pos Early	100021123	2759	205.155					1.7805	1.7944		1.78745		1.04062	0.404098		1.84813
2421	1-linoleoyl-GPG (18:2)*	Lipid	Lysophospholipid		54885	LC/MS Neg	100009227	5516	507.273					1.4918	1.2944		1.3931		0.966208	0.232487		1.8362
18	allo-threonine	Amino Acid	Glycine, Serine and Threonine Metabolism		15142	LC/MS Polar	100000272	2511.1	118.051	99289	28954-12-3	C05519	HMDB04041	2.581	2.2717		2.42635		1.06291	0.743349		1.83419
	X - 17340				47872	LC/MS Neg		4697	539.25					2.4791	2.241		2.36005		1.18952	0.657753		1.7796
73	hydantoin-5-propionate	Amino Acid	Histidine Metabolism		40473	LC/MS Polar	100002514	2080	171.041	782	5624-26-0	C05565	HMDB01212	2.4403	2.6427		2.5415		1.09941	0.812016		1.77594
	X - 19141				46701	LC/MS Neg		3705	415.197					3.1376	3.0993		3.11845		1.24894	1.05827		1.76658
677	cyclo(met-pro)	Peptide	Dipeptide		52350	LC/MS Pos Early	100006759	2190	229.101	5325718	1355217-56-9			1.565	1.5708		1.5679		0.881132	0.392738		1.74867
	X - 15492				46662	LC/MS Neg		4678	541.265					2.0202	1.9063		1.96325		1.09909	0.510271		1.69353
563	gamma-glutamylvaline	Peptide	Gamma-glutamyl Amino Acid		43829	LC/MS Pos Early	100001126	2700	247.129	7015683	2746-34-1		HMDB11172	1.4751	1.4102		1.44265		0.9954	0.27374		1.63385
4150	caffeine	Xenobiotics	Xanthine Metabolism		569	LC/MS Pos Early	849	2106	195.088	2519	58-08-2	C07481	HMDB01847	2.4511	2.3233		2.3872		0.93314	0.905337		1.6061
1263	N-acetylneuraminate	Carbohydrate	Aminosugar Metabolism		32377	LC/MS Pos Early	1162	660	310.113	439197	131-48-6	C00270	HMDB00230	1.5328	1.5924		1.5626		1.0812	0.300422		1.60243
408	N-acetyltaurine	Amino Acid	Methionine, Cysteine, SAM and Taurine Metabolism		48187	LC/MS Polar	100005466	1249	166.018	159864				1.7038	1.4596		1.5817		1.09027	0.310366		1.58339
286	6-bromotryptophan	Amino Acid	Tryptophan Metabolism		62503	LC/MS Neg	100020414	3565	280.993					1.4836	1.2668		1.3752		0.940068	0.278776		1.56087
4156	1,3-dimethylurate	Xenobiotics	Xanthine Metabolism		32391	LC/MS Neg	100001106	1671.4	195.052	70346	944-73-0		HMDB01857	2.3179	2.2502		2.28405		1.12626	0.745174		1.55372
1070	1,5-anhydroglucitol (1,5-AG)	Carbohydrate	Glycolysis, Gluconeogenesis, and Pyruvate Metabolism		20675	LC/MS Neg	100000580	802	163.061	64960	154-58-5	C07326	HMDB02712	1.7468	1.7021		1.72445		0.93154	0.510472		1.55329
	X - 17357				48009	LC/MS Neg		4098	541.265					1.6276	1.5068		1.5672		0.983588	0.37961		1.5374
	X - 13728				46645	LC/MS Neg		1589	197.068					2.4535	2.262		2.35775		1.07804	0.837596		1.52783
2415	1-palmitoyl-GPG (16:0)*	Lipid	Lysophospholipid		45970	LC/MS Neg	100005717	5570	483.273	3300276				1.3376	1.3726		1.3551		0.84846	0.3365		1.50562
2696	sphinganine	Lipid	Sphingolipid Synthesis		17769	LC/MS Pos Late	313	1413	302.305	3126	3102-56-5	C00836	HMDB00269	1.5886	1.5412		1.5649		1.08913	0.317255		1.49965
562	gamma-glutamyltyrosine	Peptide	Gamma-glutamyl Amino Acid		2734	LC/MS Pos Early	1102	2518	311.124	94340	7432-23-7		HMDB11741	1.5163	1.5077		1.512		0.938476	0.388502		1.47624
129	N,N,N-trimethyl-5-aminovalerate	Amino Acid	Lysine Metabolism		57687	LC/MS Pos Early	100015962	2186	160.133					1.6333	1.5625		1.5979		1.0225	0.391788		1.46866
3116	deoxycholic acid glucuronide	Lipid	Secondary Bile Acid Metabolism		63610	LC/MS Neg	100020550	4800	567.317					4.1747	4.3551		4.2649		1.4085	1.96889		1.45077
416	urea	Amino Acid	Urea cycle; Arginine and Proline Metabolism		1670	LC/MS Pos Early	533	700	121.072	1176	57-13-6	C00086	HMDB00294	1.4258	1.3434		1.3846		1.05274	0.229371		1.44685
4160	1-methylxanthine	Xenobiotics	Xanthine Metabolism		34389	LC/MS Neg	100001405	1568.8	165.042	80220	6136-37-4	C16358	HMDB10738	1.5553	1.7341		1.6447		0.890172	0.523973		1.44001
3112	deoxycholate	Lipid	Secondary Bile Acid Metabolism		1114	LC/MS Neg	302	5294	391.285	222528	83-44-3	C04483	HMDB00626	2.7128	2.3783		2.54555		1.19193	0.943211		1.43512
313	beta-hydroxyisovalerate	Amino Acid	Leucine, Isoleucine and Valine Metabolism		12129	LC/MS Neg	1442	1027	117.056	69362	625-08-1		HMDB00754	1.731	1.5774		1.6542		1.03443	0.435235		1.42398
	X - 11787				33132	LC/MS Pos Early		2319	148.097					1.5187	1.4463		1.4825		1.0711	0.290496		1.41621
423	citrulline	Amino Acid	Urea cycle; Arginine and Proline Metabolism		2132	LC/MS Pos Early	391	1520	176.103	9750	372-75-8	C00327	HMDB00904	1.345	1.2551		1.30005		0.970656	0.23368		1.40959
4161	3-methylxanthine	Xenobiotics	Xanthine Metabolism		32445	LC/MS Pos Early	100001108	1415	167.056	70639	1076-22-8	C16357	HMDB01886	1.6546	1.7039		1.67925		0.949292	0.520699		1.40188
	X - 23666				49543	LC/MS Pos Early		2990	159.149					1.3206	1.3176		1.3191		0.933772	0.281826		1.36726
4159	1,3,7-trimethylurate	Xenobiotics	Xanthine Metabolism		34404	LC/MS Neg	100001397	1985	209.068	79437	5415-44-1	C16361	HMDB02123	2.4958	2.3553		2.42555		0.981532	1.05734		1.36571
3095	glycochenodeoxycholate	Lipid	Primary Bile Acid Metabolism		32346	LC/MS Neg	1628	5236.1	448.307	12544	16564-43-5	C05466	HMDB00637	1.9038	1.7417		1.82275		0.942208	0.650031		1.35462
3001	tetrahydrocortisol sulfate (1)	Lipid	Corticosteroids		62793	LC/MS Neg	100020848	4276	445.19					1.9262	1.7806		1.8534		1.00422	0.627816		1.35259
5464	metabolonic lactone sulfate	Partially Characterized Molecules	Partially Characterized Molecules		63153	LC/MS Neg	100021331	4802	427.216					1.8181	1.9058		1.86195		1.05799	0.595704		1.3496
209	N-formylphenylalanine	Amino Acid	Tyrosine Metabolism		48433	LC/MS Neg	100006056	2360	192.067	759256	13200-85-6			1	1.8875		1.44375		0.777816	0.495551		1.34383
3916	nicotinamide	Cofactors and Vitamins	Nicotinate and Nicotinamide Metabolism		594	LC/MS Pos Early	432	1942	123.055	936	98-92-0	C00153	HMDB01406	1.6122	1.5195		1.56585		1.04413	0.394405		1.32281
	X - 15486				46266	LC/MS Neg		3629	269.151					1.9201	1.7975		1.8588		1.05788	0.606081		1.32148
3912	quinolinate	Cofactors and Vitamins	Nicotinate and Nicotinamide Metabolism		1899	LC/MS Pos Early	182	845	168.029	1066	89-00-9	C03722	HMDB00232	1.7864	1.8209		1.80365		1.13206	0.508569		1.32056
68	1-methylhistidine	Amino Acid	Histidine Metabolism		30460	LC/MS Neg	100001051	1227	168.078	92105	332-80-9	C01152	HMDB00001	1.4194	1.36		1.3897		1.07144	0.241143		1.31981
266	indolelactate	Amino Acid	Tryptophan Metabolism		18349	LC/MS Neg	100000463	2286	204.067	92904	832-97-3	C02043	HMDB00671	1.3993	1.3036		1.35145		0.994248	0.276059		1.29394
4340	dihydrocaffeate sulfate (2)	Xenobiotics	Food Component/Plant		62524	LC/MS Polar	100020822	1328	261.007	49844181				2.2933	2.2725		2.2829		1.10943	0.910312		1.28909
559	gamma-glutamylphenylalanine	Peptide	Gamma-glutamyl Amino Acid		33422	LC/MS Pos Early	100000491	2992	295.129	111299	7432-24-8		HMDB00594	1.1841	1.3598		1.27195		0.971328	0.233562		1.28712
56	carboxyethyl-GABA	Amino Acid	Glutamate Metabolism		40007	LC/MS Pos Early	100003260	2085	176.092	2572	4386-03-02		HMDB02201	1.3483	1.2746		1.31145		0.917196	0.307015		1.28415
184	vanillylmandelate (VMA)	Amino Acid	Tyrosine Metabolism		1567	LC/MS Neg	1111	941	197.046	1245	55-10-7	C05584	HMDB00291	1.614	1.3058		1.4599		0.981832	0.372618		1.283
3935	N1-Methyl-2-pyridone-5-carboxamide	Cofactors and Vitamins	Nicotinate and Nicotinamide Metabolism		40469	LC/MS Pos Early	100001468	1250	153.066	69698	701-44-0	C05842	HMDB04193	1.5516	1.3821		1.46685		1.0389	0.339896		1.25905
	X - 24556				52877	LC/MS Neg		2318	283.119					2.28	2.0972		2.1886		1.16817	0.830239		1.22908
4157	1,7-dimethylurate	Xenobiotics	Xanthine Metabolism		34400	LC/MS Neg	100001399	1578.6	195.052	91611	33868-03-0	C16356	HMDB11103	2.0515	1.9151		1.9833		1.10934	0.712433		1.22673
	X - 14939				46657	LC/MS Neg		4353	165.092					2.1457	1.9937		2.0697		1.2435	0.679647		1.21562
496	cysteinylglycine	Amino Acid	Glutathione Metabolism		35637	LC/MS Pos Early	278	2132	179.048	439498	19246-18-5	C01419	HMDB00078	1.4084	1.5461		1.47725		1.07374	0.333016		1.21167
	X - 11315				49592	LC/MS Neg		1157	128.071					1.6011	1.3444		1.47275		0.964248	0.420469		1.20937
	X - 21319				46363	LC/MS Neg		4238.4	165.092					1.8384	1.8654		1.8519		1.13241	0.59881		1.20154
	X - 11444				46460	LC/MS Neg		3972	541.265					1.7425	1.6045		1.6735		1.10234	0.478105		1.19462
3091	chenodeoxycholic acid sulfate (1)	Lipid	Primary Bile Acid Metabolism		63607	LC/MS Neg	100021650	4531	235.118					2.9052	2.4458		2.6755		1.11564	1.3068		1.19364
	X - 15461				46283	LC/MS Pos Early		1624	160.097					1.4421	1.3008		1.37145		1.0563	0.265834		1.1855
4154	1-methylurate	Xenobiotics	Xanthine Metabolism		34395	LC/MS Neg	100001400	1099	181.037	69726	708-79-2	C16359	HMDB03099	1.5413	1.5784		1.55985		0.93044	0.531595		1.184
149	4-hydroxyphenylacetate	Amino Acid	Phenylalanine Metabolism		541	LC/MS Neg	144	1361	151.04	127	156-38-7	C00642	HMDB00020	2.9606	2.0517		2.50615		1.17907	1.12387		1.18082
4573	methyl glucopyranoside (alpha + beta)	Xenobiotics	Food Component/Plant		46144	LC/MS Neg	100005864	1070	193.072					1.711	1.7836		1.7473		0.916156	0.710793		1.16932
420	3-amino-2-piperidone	Amino Acid	Urea cycle; Arginine and Proline Metabolism		62853	LC/MS Pos Early	100020361	2065	115.087	5200225	1892-22-4		HMDB00323	1.3627	1.2486		1.30565		0.96932	0.291325		1.15448
163	4-hydroxyphenylpyruvate	Amino Acid	Tyrosine Metabolism		1669	LC/MS Neg	1141	1690	179.035	979	156-39-8	C01179	HMDB00707	1.0232	1.4474		1.2353		0.944308	0.266242		1.09296
1975	phosphocholine	Lipid	Phospholipid Metabolism		34396	LC/MS Pos Early	267	700	184.073	1014	72556-74-2	C00588	HMDB01565	1.2593	1.1618		1.21055		1.00216	0.192324		1.08356
	X - 24435				52665	LC/MS Neg		6625	465.304					1.3349	1.4031		1.369		0.998704	0.347216		1.06647
244	kynurenate	Amino Acid	Tryptophan Metabolism		1417	LC/MS Neg	98	2224	188.035	3845	492-27-3	C01717	HMDB00715	1.5511	1.4288		1.48995		1.04895	0.413814		1.06569
4153	theophylline	Xenobiotics	Xanthine Metabolism		18394	LC/MS Neg	100000437	2356.9	179.058	2153	58-55-9	C07130	HMDB01889	1.7822	1.8113		1.79675		1.04172	0.72587		1.04017
942	valylleucine	Peptide	Dipeptide		39994	LC/MS Pos Early	100003210	3138	231.17	352039	22906-55-4		HMDB29131	1.4431	1.1706		1.30685		0.879064	0.412362		1.0374
3842	5-methyluridine (ribothymidine)	Nucleotide	Pyrimidine Metabolism, Uracil containing		35136	LC/MS Neg	100001446	1778.1	257.078	445408	1463-10-1		HMDB00884	1.2061	1.1342		1.17015		0.992424	0.171692		1.03515
3823	N-carbamoylaspartate	Nucleotide	Pyrimidine Metabolism, Orotate containing		1594	LC/MS Polar	1108	3800	175.036	93072	923-37-5	C00438	HMDB00828	2.8119	0.203		1.50745		0.728824	0.757235		1.02825
	X - 11470				46601	LC/MS Neg		4151	525.271					1.5745	1.5838		1.57915		1.0525	0.515428		1.02177
3744	hypoxanthine	Nucleotide	Purine Metabolism, (Hypo)Xanthine/Inosine containing		3127	LC/MS Neg	171	1291.2	135.031	790	68-94-0	C00262	HMDB00157	1.6898	1.5215		1.60565		1.1268	0.474991		1.00813
2891	7-HOCA	Lipid	Sterol		36776	LC/MS Neg	100001609	5288.1	429.301	3081085	115538-85-7	C17337	HMDB12458	1.4438	1.4128		1.4283		1.05936	0.367552		1.00379
3936	N1-Methyl-4-pyridone-3-carboxamide	Cofactors and Vitamins	Nicotinate and Nicotinamide Metabolism		57584	LC/MS Pos Early	100001469	1260	153.066	440810	769-49-3	C05843	HMDB04194	1.3991	1.2865		1.3428		0.996272	0.354766		0.97678
69	3-methylhistidine	Amino Acid	Histidine Metabolism		15677	LC/MS Neg	100000042	906.3	168.078	64969	368-16-1	C01152	HMDB00479	2.0802	2.0374		2.0588		1.17576	0.910337		0.97001
152	tyrosine	Amino Acid	Tyrosine Metabolism		1299	LC/MS Pos Early	815	2430	182.081	6057	60-18-4	C00082	HMDB00158	1.1245	1.0533		1.0889		0.922372	0.172984		0.962681
565	gamma-glutamylcitrulline*	Peptide	Gamma-glutamyl Amino Acid		62104	LC/MS Pos Early	100020241	1644	305.146					1.4874	1.288		1.3877		0.988932	0.419915		0.94964
498	cys-gly, oxidized	Amino Acid	Glutathione Metabolism		18368	LC/MS Pos Early	1224	2947	355.074	333293	7729-20-6			1.2432	1.3358		1.2895		0.997332	0.308445		0.947229
3957	ascorbic acid 2-sulfate	Cofactors and Vitamins	Ascorbate and Aldarate Metabolism		63590	LC/MS Polar	100009329	3042	254.982	86484				1.3383	1.3446		1.34145		1.05153	0.30626		0.94664
4529	acesulfame	Xenobiotics	Food Component/Plant		48569	LC/MS Polar	100006203	756	161.987	36573	55589-62-3		HMDB33585	4.8749	4.5789		4.7269		1.40928	3.50611		0.94624
4151	paraxanthine	Xenobiotics	Xanthine Metabolism		18254	LC/MS Neg	100000453	2279	179.058	4687	611-59-6	C13747	HMDB01860	1.5246	1.5488		1.5367		0.970812	0.600035		0.943092
1719	linoleoylcholine*	Lipid	Fatty Acid Metabolism (Acyl Choline)		57463	LC/MS Pos Late	100015760	1388	366.337					1.9901	1.6869		1.8385		0.996208	0.901726		0.934088
1974	choline	Lipid	Phospholipid Metabolism		15506	LC/MS Pos Early	1256	1961	104.107	305	67-48-1	C00114	HMDB00097	1.2732	1.2004		1.2368		1.04396	0.208843		0.923353
405	hypotaurine	Amino Acid	Methionine, Cysteine, SAM and Taurine Metabolism		590	LC/MS Polar	358	2763.4	108.013	107812	300-84-5	C00519	HMDB00965	1.3008	1.1973		1.24905		0.961984	0.311838		0.920561
443	prolylhydroxyproline	Amino Acid	Urea cycle; Arginine and Proline Metabolism		35127	LC/MS Pos Early	100001167	2128	229.118	11673055	18684-24-7		HMDB06695	1.6063	1.5849		1.5956		1.11979	0.519546		0.915822
	X - 12844				46633	LC/MS Neg		4185	539.249					1.4686	1.3247		1.39665		1.0124	0.423861		0.906539
457	creatinine	Amino Acid	Creatine Metabolism		513	LC/MS Pos Early	275	2055	114.066	588	60-27-5	C00791	HMDB00562	1.1749	1.1487		1.1618		1.02425	0.152658		0.90102
673	cyclo(leu-pro)	Peptide	Dipeptide		37104	LC/MS Pos Early	100001925	2670	211.144	7074739	2873-36-1			1.9211	1.8146		1.86785		1.1708	0.782997		0.890229
	X - 25422				62719	LC/MS Pos Early		1730.3	175.083					1.5307	1.2476		1.38915		1.05574	0.374612		0.890014
	X - 25797				63567	LC/MS Pos Early		3024	383.039					1.0523	1.0856		1.06895		0.986004	0.0954281		0.869199
1784	9-hydroxystearate	Lipid	Fatty Acid, Monohydroxy		47120	LC/MS Neg	100005834	5384	299.259	9570127	25498-28-6		HMDB61661	1.9083	1.7734		1.84085		1.11846	0.839792		0.860197
45	N-acetylglutamate	Amino Acid	Glutamate Metabolism		15720	LC/MS Polar	100000282	3106	188.056	70914	5817-08-03	C00624	HMDB01138	1.2635	1.2254		1.24445		1.01664	0.265008		0.859619
645	cyclo(ala-pro)	Peptide	Dipeptide		47098	LC/MS Pos Early	100004646	1486	169.097	6428987				1.1762	1.6912		1.4337		0.958424	0.559981		0.848736
5442	glutamine conjugate of C6H10O2 (1)*	Partially Characterized Molecules	Partially Characterized Molecules		63657	LC/MS Pos Early	100020261	2262	243.134					2.2841	2.0898		2.18695		1.24672	1.11084		0.846411
1513	dodecadienoate (12:2)*	Lipid	Fatty Acid, Dicarboxylate		62276	LC/MS Neg	100020478	5146	195.139					1.2249	1.4844		1.35465		0.976916	0.451522		0.83658
3088	glycocholate	Lipid	Primary Bile Acid Metabolism		18476	LC/MS Neg	342	5163	464.302	10140	475-31-0;863-57-0	C01921	HMDB00138	1.6198	1.6085		1.61415		1.04899	0.680482		0.830526
50	gamma-carboxyglutamate	Amino Acid	Glutamate Metabolism		38754	LC/MS Pos Early	100002679	903	192.05	40772	56271-99-9		HMDB41900	1.223	1.0571		1.14005		1.01218	0.154069		0.829977
	X - 18922				46700	LC/MS Neg		4928	299.186					1.0273	1.3942		1.21075		0.890168	0.388628		0.824908
5460	glycine conjugate of C10H14O2 (1)*	Partially Characterized Molecules	Partially Characterized Molecules		62146	LC/MS Neg	100020254	4335	222.114					1.516	1.3849		1.45045		0.977136	0.574739		0.823528
560	gamma-glutamylthreonine	Peptide	Gamma-glutamyl Amino Acid		33364	LC/MS Pos Early	100001314	1750	249.108	76078708	5652-48-2		HMDB29159	1.2042	1.0213		1.11275		0.92496	0.228687		0.821165
229	tryptophan	Amino Acid	Tryptophan Metabolism		54	LC/MS Pos Early	565	2986	205.097	6305	73-22-3	C00078	HMDB00929	1.0795	1.1126		1.09605		0.993564	0.125443		0.816991
	X - 11478				46602	LC/MS Neg		4285	165.092					1.4395	1.2844		1.36195		0.954124	0.518315		0.786831
430	N-acetylarginine	Amino Acid	Urea cycle; Arginine and Proline Metabolism		33953	LC/MS Pos Early	100001266	2245	217.13	67427	155-84-0	C02562	HMDB04620	1.5896	1.6346		1.6121		1.14416	0.596326		0.784711
1113	ribonate	Carbohydrate	Pentose Metabolism		27731	LC/MS Polar	100001007	2425	165.041	5460677	5336-08-03	C01685	HMDB00867	1.5611	1.0305		1.2958		0.948864	0.444649		0.780247
5386	3-bromo-5-chloro-2,6-dihydroxybenzoic acid*	Xenobiotics	Chemical		63681	LC/MS Neg	100021707	4505	264.891					1.2343	1.0522		1.14325		0.86262	0.360778		0.777846
	X - 21342				46387	LC/MS Neg		5149	385.166					1.38	0.9743		1.17715		1.04302	0.172939		0.77557
	X - 12026				47905	LC/MS Neg		1652	180.053					1.4414	1.2786		1.36		1.06187	0.386098		0.772156
1627	3-hydroxybutyroylglycine	Lipid	Fatty Acid Metabolism (Acyl Glycine)		62064	LC/MS Neg	100020211	889	160.061					1.4304	1.2249		1.32765		0.94908	0.493523		0.767076
1625	2-butenoylglycine	Lipid	Fatty Acid Metabolism (Acyl Glycine)		61785	LC/MS Neg	100016110	1380	142.051	6303498	71428-89-2			1.6207	0.8411		1.2309		0.815356	0.543508		0.764559
1673	linolenoylcarnitine (C18:3)*	Lipid	Fatty Acid Metabolism (Acyl Carnitine, Polyunsaturated)		57511	LC/MS Pos Late	100015831	1310	422.327					1.4498	1.1543		1.30205		1.00144	0.393555		0.763823
2990	cortisone	Lipid	Corticosteroids		1769	LC/MS Neg	273	4575	359.186	222786	53-06-5	C00762	HMDB02802	1.3453	1.475		1.41015		1.099	0.408433		0.761824
	X - 21353				46398	LC/MS Neg		5196	239.166					1.7843	1.3495		1.5669		1.08738	0.633832		0.756535
2894	3beta-hydroxy-5-cholestenoate	Lipid	Sterol		54805	LC/MS Neg	100006370	5398	415.322	165511	6561-58-6	C17333		1.1365	1.2478		1.19215		0.924904	0.353677		0.755621
	X - 12101				47642	LC/MS Pos Early		2700	164.074					1.9181	1.8938		1.90595		1.23388	0.900539		0.746298
1716	palmitoloelycholine	Lipid	Fatty Acid Metabolism (Acyl Choline)		53257	LC/MS Pos Late	100009334	1385	340.321					1.1534	1.0946		1.124		0.671556	0.607609		0.74463
153	N-acetyltyrosine	Amino Acid	Tyrosine Metabolism		32390	LC/MS Neg	100001104	1680	222.077	68310	537-55-3		HMDB00866	1.0053	1.146		1.07565		0.856096	0.297421		0.738192
1913	arachidonoyl ethanolamide	Lipid	Endocannabinoid		32463	LC/MS Pos Late	1488	1560	348.29	5281969	94421-68-8	C11695	HMDB04080	1.5322	0.9483		1.24025		0.973516	0.369972		0.720957
	X - 12753				47723	LC/MS Pos Early		1422	220.064					2.1717	1.7436		1.95765		1.07758	1.23793		0.710925
4289	3-formylindole	Xenobiotics	Food Component/Plant		62863	LC/MS Polar	100020219	782	144.046	10256	487-89-8	C08493	HMDB29737	1.0882	1.0229		1.05555		0.88638	0.238011		0.710764
3068	11beta-hydroxyandrosterone glucuronide	Lipid	Androgenic Steroids		63251	LC/MS Neg	100020541	4209	481.244					1.5463	1.4228		1.48455		1.05644	0.602874		0.710109
	X - 11847				46488	LC/MS Neg		3087	259.01					2.1698	1.8712		2.0205		0.90066	1.58786		0.705253
4162	7-methylxanthine	Xenobiotics	Xanthine Metabolism		34390	LC/MS Pos Early	100001396	1350	167.056	68374	552-62-5	C16353	HMDB01991	1.5562	1.5874		1.5718		1.05869	0.731286		0.701657
	X - 13835				46646	LC/MS Neg		1017	169.062					1.8801	1.689		1.78455		1.11794	0.952832		0.699609
5385	3,5-dichloro-2,6-dihydroxybenzoic acid	Xenobiotics	Chemical		63589	LC/MS Polar	100021324	693	220.941					1.3117	1.3896		1.35065		1.01658	0.481413		0.693937
192	homovanillate (HVA)	Amino Acid	Tyrosine Metabolism		1101	LC/MS Neg	117	1649	181.051	1738	306-08-1	C05582	HMDB00118	1.0732	1.0352		1.0542		0.854684	0.288278		0.692096
3840	5,6-dihydrouridine	Nucleotide	Pyrimidine Metabolism, Uracil containing		61833	LC/MS Neg	100001425	1119	245.078	94312	5627-05-04			1.1324	1.0836		1.108		0.94286	0.240181		0.687564
17	N-acetylthreonine	Amino Acid	Glycine, Serine and Threonine Metabolism		33939	LC/MS Neg	100001274	821.6	160.061	152204	17093-74-2		HMDB62557	1.1368	1.1333		1.13505		1.00676	0.186625		0.687422
	X - 12729				46623	LC/MS Neg		2021	227.997					1.6714	1.9598		1.8156		1.235	0.892722		0.650366
1338	5-dodecenoate (12:1n7)	Lipid	Medium Chain Fatty Acid		33968	LC/MS Neg	100001232	5224	197.155	5312378	2430-94-6		HMDB00529	1.695	1.5169		1.60595		1.16895	0.677041		0.645459
361	alpha-hydroxyisovalerate	Amino Acid	Leucine, Isoleucine and Valine Metabolism		46537	LC/MS Polar	100001300	1052	117.056	99823	600-37-3		HMDB00407	1.429	1.3332		1.3811		1.06632	0.487959		0.645087
	X - 12680				47437	LC/MS Pos Early		2875	229.129					1.4255	1.4229		1.4242		1.03685	0.600506		0.645036
112	5-(galactosylhydroxy)-L-lysine	Amino Acid	Lysine Metabolism		43582	LC/MS Pos Early	100002462	2755	325.161	123986	32448-36-5			1.1189	1.463		1.29095		1.05274	0.371631		0.640975
3857	beta-alanine	Nucleotide	Pyrimidine Metabolism, Uracil containing		55	LC/MS Pos Early	244	1905	90.055	239	56-41-7;107-95-9	C00099	HMDB00056	1.3531	1.2754		1.31425		1.09749	0.340991		0.63567
1087	3-phosphoglycerate	Carbohydrate	Glycolysis, Gluconeogenesis, and Pyruvate Metabolism		1414	LC/MS Pos Early	132	590	187	724	80731-10-8	C00597	HMDB00807	1.9248	1.8529		1.88885		1.24349	1.02133		0.631883
81	N-acetylcarnosine	Amino Acid	Histidine Metabolism		43488	LC/MS Neg	100004046	1235	267.11	9903482	56353-15-2		HMDB12881	1.5047	1.2833		1.394		1.01082	0.607974		0.630251
16	threonine	Amino Acid	Glycine, Serine and Threonine Metabolism		1284	LC/MS Pos Early	564	1514	120.066	6288	72-19-5	C00188	HMDB00167	1.1501	1.1085		1.1293		0.998752	0.209207		0.624014
4557	theanine	Xenobiotics	Food Component/Plant		22206	LC/MS Pos Early	100000784	2180	175.108	439378	3081-61-6	C01047	HMDB34365	7.3334	7.1186		7.226		3.48798	6.03528		0.619362
554	gamma-glutamylisoleucine*	Peptide	Gamma-glutamyl Amino Acid		34456	LC/MS Pos Early	100001485	2940	261.144	14253342			HMDB11170	1.0717	1.0931		1.0824		0.91304	0.274649		0.616642
553	gamma-glutamylhistidine	Peptide	Gamma-glutamyl Amino Acid		18245	LC/MS Pos Early	1235	2740	285.119	7017195	37460-15-4			1.0434	1.1554		1.0994		0.931796	0.273508		0.612794
5472	branched-chain, straight-chain, or cyclopropyl 10:1 fatty acid (1)*	Partially Characterized Molecules	Partially Characterized Molecules		63615	LC/MS Neg	100021666	4805	169.123					1.2423	1.134		1.18815		0.946824	0.395743		0.609805
480	5-methylthioadenosine (MTA)	Amino Acid	Polyamine Metabolism		1419	LC/MS Pos Early	212	2752	298.097	439176	2457-80-9	C00170	HMDB01173	1.2881	1.2356		1.26185		1.08405	0.292154		0.608576
1574	2-aminoheptanoate	Lipid	Fatty Acid, Amino		43761	LC/MS Pos Early	100004542	3160	146.118	227939	1115-90-8			1.3577	1.2848		1.32125		1.05264	0.443841		0.605194
3824	dihydroorotate	Nucleotide	Pyrimidine Metabolism, Orotate containing		601	LC/MS Polar	923	1910	157.025	648	155-54-4	C00337	HMDB03349	1.619	1.3696		1.4943		1.1363	0.591982		0.604755
337	2-hydroxy-3-methylvalerate	Amino Acid	Leucine, Isoleucine and Valine Metabolism	5 carbon chain, potential HAO1 substrate. Product would be 3-Methyl-2-oxovaleric acid which is reduced in the HAO1 knockout woman	36746	LC/MS Neg	100001541	1800	131.071	164623	488-15-3		HMDB00317	1.6653	1.4883		1.5768		1.18943	0.650071		0.595892
1039	4-hydroxyphenylacetylglutamine	Peptide	Acetylated Peptides		55017	LC/MS Pos Early	100010850	1528	281.113					3.4057	3.1646		3.28515		1.58096	2.93308		0.581025
140	phenylpyruvate	Amino Acid	Phenylalanine Metabolism		566	LC/MS Neg	241	2515	163.04	997	156-06-9	C00166	HMDB00205	1.2038	1.002		1.1029		0.956504	0.253369		0.577799
1721	stearoylcholine*	Lipid	Fatty Acid Metabolism (Acyl Choline)		57464	LC/MS Pos Late	100015759	1520	370.368					1.6123	1.2682		1.44025		0.944812	0.864885		0.572837
141	phenyllactate (PLA)	Amino Acid	Phenylalanine Metabolism		22130	LC/MS Neg	100000774	2208	165.056	3848	828-01-3	C05607	HMDB00779	1.1175	1.0194		1.06845		0.909028	0.283613		0.562111
3774	1-methyladenosine	Nucleotide	Purine Metabolism, Adenine containing		15650	LC/MS Pos Early	1242	2120	282.12	27476	15763-06-1	C02494	HMDB03331	1.1061	1.0525		1.0793		0.980744	0.180265		0.546727
372	N-acetylmethionine	Amino Acid	Methionine, Cysteine, SAM and Taurine Metabolism		1589	LC/MS Neg	1083	1787	190.054	448580	65-82-7	C02712	HMDB11745	1.2481	1.2346		1.24135		1.06558	0.322414		0.545157
3825	orotate	Nucleotide	Pyrimidine Metabolism, Orotate containing		1505	LC/MS Polar	445	1638.1	155.01	967	50887-69-9	C00295	HMDB00226	1.3661	1.3254		1.34575		1.05122	0.540872		0.544554
5470	carnitine of C10H14O2 (5)*	Partially Characterized Molecules	Partially Characterized Molecules		63650	LC/MS Neg	100021678	4521	370.187					1.2597	1.1102		1.18495		0.898948	0.526368		0.54335
3152	hyocholate	Lipid	Secondary Bile Acid Metabolism		34093	LC/MS Neg	100001279	5046	407.28	92805	547-75-1	C17649	HMDB00760	1.3643	1.4058		1.38505		1.05466	0.608349		0.543093
1277	N-acetylglucosamine/N-acetylgalactosamine	Carbohydrate	Aminosugar Metabolism		46539	LC/MS Pos Early	100006435	715	222.097	24139			HMDB00215	1.2282	1.0746		1.1514		1.0267	0.2431		0.512941
	X - 24699				53127	LC/MS Pos Early		2402	241.154					1.2143	1.1425		1.1784		1.02745	0.294957		0.511777
3769	adenine	Nucleotide	Purine Metabolism, Adenine containing		554	LC/MS Pos Early	880	2221	136.062	190	73-24-5	C00147	HMDB00034	1.1563	1.1013		1.1288		0.9407	0.36932		0.509315
1506	decadienedioic acid (C10:2-DC)	Lipid	Fatty Acid, Dicarboxylate		63685	LC/MS Polar	100021711	2329.7	197.082					1.2381	1.3543		1.2962		1.02153	0.540481		0.508192
3785	N6-carbamoylthreonyladenosine	Nucleotide	Purine Metabolism, Adenine containing		35157	LC/MS Neg	100001415	2164	411.127	161466	24719-82-2		HMDB41623	1.2114	1.0931		1.15225		1.04702	0.208224		0.505389
1396	linolenate (18:3n3 or 3n6)	Lipid	Long Chain Polyunsaturated Fatty Acid (n3 and n6)		34035	LC/MS Neg	100001337	5450	277.217	5280934		C06426	HMDB03073	1.4498	1.4343		1.44205		1.11157	0.654806		0.504696
497	cysteinylglycine disulfide*	Amino Acid	Glutathione Metabolism		62103	LC/MS Pos Early	100002466	2547	298.053		70555-24-7		HMDB00709	1.1288	1.1129		1.12085		1.03238	0.176369		0.501641
1685	adipoylcarnitine (C6-DC)	Lipid	Fatty Acid Metabolism (Acyl Carnitine, Dicarboxylate)		52988	LC/MS Pos Early	100006614	2570	290.16	71296139			HMDB61677	1.1886	1.3472		1.2679		1.01131	0.521928		0.491615
2945	pregnenetriol sulfate*	Lipid	Pregnenolone Steroids		62922	LC/MS Neg	100021103	4749	413.2					1.519	1.4208		1.4699		1.16936	0.611556		0.491441
3035	androstenediol (3alpha, 17alpha) monosulfate (2)	Lipid	Androgenic Steroids		37207	LC/MS Neg	100002026	4712	369.174					1.6251	1.5165		1.5708		1.16053	0.839403		0.488767
242	N-acetylkynurenine (2)	Amino Acid	Tryptophan Metabolism		48757	LC/MS Pos Early	100006378	2364	251.103					1.135	1.1766		1.1558		0.809332	0.710946		0.487334
	X - 12462				46620	LC/MS Pos Early		1790	148.043					1.0588	1.1115		1.08515		1.01828	0.138015		0.484541
67	histidine	Amino Acid	Histidine Metabolism		59	LC/MS Neg	355	755.9	154.062	6274	5934-29-2	C00135	HMDB00177	1.0704	1.0324		1.0514		0.97548	0.15701		0.483535
2937	21-hydroxypregnenolone disulfate	Lipid	Pregnenolone Steroids		46115	LC/MS Neg	100001999	3935	245.067	134595	1164-98-3			1.453	1.4169		1.43495		1.14478	0.603376		0.480918
1596	propionylglycine (C3)	Lipid	Fatty Acid Metabolism (also BCAA Metabolism)		31932	LC/MS Polar	100001150	1502.5	130.051	98681	21709-90-0		HMDB00783	1.4927	1.4434		1.46805		1.0925	0.794538		0.47266
1328	caproate (6:0)	Lipid	Medium Chain Fatty Acid		32489	LC/MS Neg	926	2713.7	115.076	8892	142-62-1	C01585	HMDB00535	0.8508	1.3401		1.09545		0.998408	0.207764		0.467078
	X - 12524				46621	LC/MS Neg		5780	205.16					1.3598	1.0637		1.21175		1.03348	0.384972		0.463083
1595	propionylcarnitine (C3)	Lipid	Fatty Acid Metabolism (also BCAA Metabolism)		32452	LC/MS Pos Early	100001162	2590	218.139	107738	17298-37-2	C03017	HMDB00824	1.1853	1.143		1.16415		1.01879	0.325593		0.446441
4063	4-hydroxyhippurate	Xenobiotics	Benzoate Metabolism		35527	LC/MS Neg	100001423	1475	194.046	151012	2482-25-9		HMDB13678	1.8016	1.6433		1.72245		1.29577	0.956755		0.445968
360	3-methyl-2-oxobutyrate	Amino Acid	Leucine, Isoleucine and Valine Metabolism		44526	LC/MS Neg	100000936	1465	115.04	49	3715-29-5	C00141	HMDB00019	1.143	1.1256		1.1343		1.02478	0.250361		0.437465
	X - 24728				53157	LC/MS Pos Early		1431	238.038					1.1305	1.1124		1.12145		0.937144	0.429988		0.42863
373	N-formylmethionine	Amino Acid	Methionine, Cysteine, SAM and Taurine Metabolism		2829	LC/MS Neg	194	1543.8	176.039	439750	4289-98-9	C03145	HMDB01015	1.0974	1.151		1.1242		1.02391	0.235088		0.426598
4152	theobromine	Xenobiotics	Xanthine Metabolism		18392	LC/MS Pos Early	100000445	1600	181.072	5429	83-67-0	C07480	HMDB02825	1.5075	1.2509		1.3792		1.01637	0.858454		0.422657
384	2,3-dihydroxy-5-methylthio-4-pentenoate (DMTPA)*	Amino Acid	Methionine, Cysteine, SAM and Taurine Metabolism		62805	LC/MS Neg	100020893	1156	177.023					1.2031	1.1483		1.1757		1.06813	0.257886		0.417115
	X - 21607				46674	LC/MS Neg		4529	167.108					1.0509	1.0907		1.0708		0.934572	0.32708		0.416497
1714	palmitoylcholine	Lipid	Fatty Acid Metabolism (Acyl Choline)		52944	LC/MS Pos Late	100009233	1482	342.337	151731				1.5849	1.2767		1.4308		1.04095	0.9443		0.412848
1945	myo-inositol	Lipid	Inositol Metabolism		1124	LC/MS Polar	363	3506.3	225.062	892	87-89-8	C00137	HMDB00211	1.0628	1.097		1.0799		0.98534	0.22912		0.41271
499	5-oxoproline	Amino Acid	Glutathione Metabolism		1494	LC/MS Neg	1021	738.5	128.035	7405	98-79-3	C01879	HMDB00267	1.1184	0.9471		1.03275		0.971748	0.14827		0.411424
	X - 24549				52870	LC/MS Neg		2610	202.051					1.124	1.1653		1.14465		0.95584	0.460299		0.41019
3895	3-aminoisobutyrate	Nucleotide	Pyrimidine Metabolism, Thymine containing		1566	LC/MS Pos Early	1114	2190	104.071	64956	10569-72-9;214139-20-5	C05145	HMDB03911	1.1899	1.1793		1.1846		0.97862	0.505659		0.407349
2996	cortolone glucuronide (1)	Lipid	Corticosteroids		57699	LC/MS Neg	100015971	4600	541.265					1.3097	1.2768		1.29325		1.10274	0.469564		0.405708
119	glutarylcarnitine (C5-DC)	Amino Acid	Lysine Metabolism		44664	LC/MS Pos Early	100001593	2393	276.144	71464488	102636-82-8		HMDB13130	1.1605	1.411		1.28575		1.0835	0.501466		0.40331
3858	N-acetyl-beta-alanine	Nucleotide	Pyrimidine Metabolism, Uracil containing		37432	LC/MS Neg	100002102	773	130.051	76406	3025-95-4	C01073		1.1564	1.0058		1.0811		0.936784	0.362223		0.398417
3827	orotidine	Nucleotide	Pyrimidine Metabolism, Orotate containing		35172	LC/MS Polar	100001416	2250	287.052	92751	314-50-1		HMDB00788	1.3291	1.2382		1.28365		1.1443	0.35036		0.397745
1524	octadecadienedioate (C18:2-DC)*	Lipid	Fatty Acid, Dicarboxylate		61860	LC/MS Neg	100019982	4676	309.207					1.0793	0.9551		1.0172		0.880028	0.346123		0.39631
	X - 17676				46970	LC/MS Neg		1485	167.047					0.9752	1.2038		1.0895		0.915264	0.442517		0.393738
41	hydroxyasparagine	Amino Acid	Alanine and Aspartate Metabolism		62060	LC/MS Pos Early	100020205	1149	149.056	97663		C03124	HMDB32332	1.1413	1.1581		1.1497		1.0544	0.242738		0.392622
1354	myristoleate (14:1n5)	Lipid	Long Chain Monounsaturated Fatty Acid		32418	LC/MS Neg	100001198	5346.9	225.186	5281119	544-64-9	C08322	HMDB02000	1.7488	1.7044		1.7266		1.29054	1.11433		0.391316
2893	3beta,7alpha-dihydroxy-5-cholestenoate	Lipid	Sterol		36803	LC/MS Neg	100001611	5275	431.317	3081084	115538-84-6	C17335		1.2197	1.207		1.21335		1.05397	0.409451		0.389248
447	N,N,N-trimethyl-alanylproline betaine (TMAP)	Amino Acid	Urea cycle; Arginine and Proline Metabolism		62947	LC/MS Pos Early	100020217	2470	229.155					1.1438	1.0814		1.1126		1.01732	0.248148		0.383948
77	formiminoglutamate	Amino Acid	Histidine Metabolism		43493	LC/MS Pos Early	100002500	1880	175.071	439233	816-90-0	C00439	HMDB00854	1.5203	1.5646		1.54245		1.242	0.794178		0.378315
1377	tetradecadienoate (14:2)*	Lipid	Long Chain Polyunsaturated Fatty Acid (n3 and n6)		62850	LC/MS Neg	100020343	5292	223.17	5312409	39039-37-7		HMDB00560	1.3441	1.3793		1.3617		1.11272	0.668599		0.37239
1715	oleoylcholine	Lipid	Fatty Acid Metabolism (Acyl Choline)		53260	LC/MS Pos Late	100009331	1449	368.352					1.2974	1.141		1.2192		0.9317	0.782927		0.367212
	X - 16935				46681	LC/MS Neg		4471	447.276					1.293	1.25		1.2715		1.04581	0.620579		0.363673
2904	4-cholesten-3-one	Lipid	Sterol		38125	LC/MS Pos Late	100002227	2520	385.346	91477	601-57-0	C00599	HMDB00921	1.2013	1.3809		1.2911		1.09475	0.545652		0.359848
5311	2-naphthol sulfate	Xenobiotics	Chemical		62520	LC/MS Neg	100020515	3658	223.007	74428				1.4754	1.3514		1.4134		1.02016	1.09302		0.359774
3753	urate	Nucleotide	Purine Metabolism, (Hypo)Xanthine/Inosine containing		1604	LC/MS Neg	1134	757.1	167.021	1175	69-93-2;120K5305	C00366	HMDB00289	1.1649	1.0876		1.12625		1.03302	0.264075		0.353059
1487	2-hydroxyglutarate	Lipid	Fatty Acid, Dicarboxylate		37253	LC/MS Polar	100002070	3352.8	147.03	43	40951-21-1	C02630	HMDB0059655	1.0605	1.1744		1.11745		1.00828	0.314377		0.347258
3096	taurochenodeoxycholate	Lipid	Primary Bile Acid Metabolism		18494	LC/MS Neg	1629	5250	498.289	387316	6009-98-9	C05465	HMDB00951	1.789	1.7005		1.74475		1.29408	1.30451		0.34547
3761	AMP	Nucleotide	Purine Metabolism, Adenine containing		32342	LC/MS Pos Early	209	1013	348.07	6083	149022-20-8	C00020	HMDB00045	1.5772	1.3789		1.47805		1.15813	0.934302		0.342414
4683	tartronate (hydroxymalonate)	Xenobiotics	Food Component/Plant	3 carbon chain, potential HAO1 substrate, product would be oxomalonic acid	20693	LC/MS Neg	100000840	610	118.999	45	80-69-3	C02287	HMDB35227	1.1463	0.7699		0.9581		0.79362	0.48461		0.339407
2543	glycerol	Lipid	Glycerolipid Metabolism		15122	LC/MS Neg	1254	758	91.0401	753	56-81-5	C00116	HMDB00131	1.2546	1.2599		1.25725		1.07683	0.533258		0.338331
1523	octadecenedioate (C18:1-DC)*	Lipid	Fatty Acid, Dicarboxylate		61861	LC/MS Neg	100019978	4875	311.223					1.0412	1.0526		1.0469		0.95152	0.282043		0.338176
1287	isocitrate	Energy	TCA Cycle		12110	LC/MS Pos Early	1206	773	210.061	1198	20226-99-7	C00311	HMDB00193	1.2752	1.1062		1.1907		1.00783	0.548038		0.333677
2927	pregnenolone sulfate	Lipid	Pregnenolone Steroids		38170	LC/MS Neg	100002129	5100	395.19	105074	1247-64-9		HMDB00774	1.6989	1.6451		1.672		1.28766	1.17498		0.3271
3839	pseudouridine	Nucleotide	Pyrimidine Metabolism, Uracil containing		33442	LC/MS Neg	821	1100	243.062	15047	1445-07-4	C02067	HMDB00767	1.0997	1.0439		1.0718		1.0161	0.174173		0.319797
3965	gulonate*	Cofactors and Vitamins	Ascorbate and Aldarate Metabolism		46957	LC/MS Polar	100001586	2750	195.051	152304	20246-53-1	C00257	HMDB03290	1.1396	1.1134		1.1265		1.00095	0.397636		0.315736
1691	suberoylcarnitine (C8-DC)	Lipid	Fatty Acid Metabolism (Acyl Carnitine, Dicarboxylate)		52990	LC/MS Pos Early	100006627	2964	318.191					1.3607	1.3569		1.3588		1.16229	0.623128		0.315357
224	thyroxine	Amino Acid	Tyrosine Metabolism		2761	LC/MS Neg	1094	4808	775.679	5819	51-48-9	C01829	HMDB01918	1.1489	1.0152		1.08205		1.03034	0.1654		0.312661
1794	12,13-DiHOME	Lipid	Fatty Acid, Dihydroxy		38395	LC/MS Neg	62	5137	313.238	10236635	263399-35-5	C14829	HMDB04705	1.2387	1.0015		1.1201		0.99716	0.401249		0.306393
3853	2'-deoxyuridine	Nucleotide	Pyrimidine Metabolism, Uracil containing		1412	LC/MS Polar	536	1100	273.073	13712	951-78-0	C00526	HMDB00012	1.0592	1.1172		1.0882		1.00734	0.264508		0.305684
5223	sulfate*	Xenobiotics	Chemical		46960	LC/MS Neg	100002528	616	96.9601	1118	14808-79-8	C00059	HMDB01448	1.0799	0.983		1.03145		1.00072	0.101151		0.303802
	X - 18913				46695	LC/MS Neg		4538	185.118					1.5301	1.3815		1.4558		1.19052	0.877835		0.302193
5443	glutamine conjugate of C6H10O2 (2)*	Partially Characterized Molecules	Partially Characterized Molecules		63660	LC/MS Pos Early	100020262	2383	243.134					2.1567	1.9466		2.05165		1.51067	1.79587		0.301237
484	4-acetamidobutanoate	Amino Acid	Polyamine Metabolism		1558	LC/MS Polar	1113	1925	144.067	18189	3025-96-5	C02946	HMDB03681	1.0969	1.1239		1.1104		1.0044	0.355563		0.29813
3964	oxalate (ethanedioate)	Cofactors and Vitamins	Ascorbate and Aldarate Metabolism		20694	LC/MS Neg	100000841	603	88.988	971	144-62-7	C00209	HMDB02329	0.9983	0.9367		0.9675		0.880428	0.294153		0.29601
3812	N2,N2-dimethylguanosine	Nucleotide	Purine Metabolism, Guanine containing		35137	LC/MS Pos Early	100001412	2210	312.13	92919	2140-67-2		HMDB04824	1.1496	1.0908		1.1202		1.05624	0.216421		0.295517
1905	oleoyl ethanolamide	Lipid	Endocannabinoid		38102	LC/MS Neg	1137	6450	324.291	5283454	11-58-0;111-58-0		HMDB02088	1.208	1.1358		1.1719		1.03028	0.48276		0.293363
1718	dihomo-linolenoyl-choline	Lipid	Fatty Acid Metabolism (Acyl Choline)		53262	LC/MS Pos Late	100009335	1424	392.352					1.3181	1.0561		1.1871		0.920256	0.917519		0.290832
	X - 14056				46632	LC/MS Pos Early		810	192.032					1.0517	1.1762		1.11395		1.01142	0.354336		0.289358
	X - 15503				49565	LC/MS Pos Early		2300	195.076					1	1.3678		1.1839		1.01381	0.593755		0.286468
2822	palmitoyl-sphingosine-phosphoethanolamine (d18:1/16:0)	Lipid	Ceramide PEs		62984	LC/MS Pos Late	100021162	2207	661.528					1.0577	1.0517		1.0547		0.99772	0.201665		0.282547
1337	laurate (12:0)	Lipid	Medium Chain Fatty Acid		1645	LC/MS Neg	181	5300	199.17	3893	143-07-7	C02679	HMDB00638	1.2387	1.2425		1.2406		1.09446	0.518786		0.281688
694	cyclo(pro-val)	Peptide	Dipeptide		49795	LC/MS Pos Early	100006065	2098	197.129	98951	2854-40-2			1.5504	1.4564		1.5034		1.26545	0.85179		0.279355
	X - 24588				52909	LC/MS Neg		2350	485.167					1.1912	1.185		1.1881		1.0673	0.435869		0.277148
1909	stearoyl ethanolamide	Lipid	Endocannabinoid		38625	LC/MS Pos Late	100002254	1787	328.321	27902	111-57-9		HMDB13078	1.2055	1.017		1.11125		1.02224	0.33303		0.267286
1251	glucuronate	Carbohydrate	Aminosugar Metabolism		15443	LC/MS Polar	100000257	3233.3	193.035	444791	207300-70-7	C00191	HMDB00127	1.0391	1.0675		1.0533		0.990128	0.239183		0.264116
208	tyramine O-sulfate	Amino Acid	Tyrosine Metabolism		48408	LC/MS Neg	100006092	1565	216.034	153005	30223-92-8		HMDB06409	3.7352	3.7262		3.7307		2.35166	5.28502		0.260934
	X - 24243				52286	LC/MS Pos Early		1003	132.065					1.2277	1.1661		1.1969		1.02445	0.668725		0.257876
1334	(2 or 3)-decenoate (10:1n7 or n8)	Lipid	Medium Chain Fatty Acid		63436	LC/MS Neg	100021502	4990	169.123					1.0597	1.1842		1.12195		0.989344	0.51911		0.255449
	X - 24951				57718	LC/MS Neg		5227	481.353					1.1111	1.0928		1.10195		0.991932	0.433682		0.253684
	X - 11849				46607	LC/MS Neg		3215	266.018					2.5692	2.3975		2.48335		1.58338	3.56623		0.252358
	X - 21364				46409	LC/MS Neg		3757	213.087					1.4635	1.1257		1.2946		1.1484	0.586723		0.249174
46	N-acetylglutamine	Amino Acid	Glutamate Metabolism		33943	LC/MS Polar	100001253	2140	187.072	182230	2490-97-3	C02716	HMDB06029	1.2239	1.4157		1.3198		1.11114	0.850753		0.24527
2880	cholesterol	Lipid	Sterol		63	LC/MS Pos Late	266	2707	369.352	11025495	57-88-5	C00187	HMDB00067	1.1539	1.0721		1.113		1.05194	0.250753		0.243507
70	N-acetylhistidine	Amino Acid	Histidine Metabolism		33946	LC/MS Polar	100001293	2088	196.073	75619	39145-52-3	C02997	HMDB32055	1.2512	1.0069		1.12905		1.03096	0.40344		0.243134
87	1-methyl-5-imidazoleacetate	Amino Acid	Histidine Metabolism		62946	LC/MS Pos Early	100002910	1989	141.066	6451814	4200-48-0		HMDB04988	1.502	1.4423		1.47215		1.23367	0.983068		0.242585
3933	trigonelline (N'-methylnicotinate)	Cofactors and Vitamins	Nicotinate and Nicotinamide Metabolism		32401	LC/MS Pos Early	100001092	1388	138.055	5570	535-83-1	C01004	HMDB00875	1.1011	1.1003		1.1007		0.951904	0.624882		0.238118
	X - 25828				63634	LC/MS Pos Early		650.2	268.081					1.0107	0.9907		1.0007		0.9273	0.314176		0.233627
3861	3-(3-amino-3-carboxypropyl)uridine*	Nucleotide	Pyrimidine Metabolism, Uracil containing		62924	LC/MS Neg	100001426	1369	344.11	171198	52745-94-5			1.2914	0.9686		1.13		1.07567	0.237785		0.228476
5	dimethylglycine	Amino Acid	Glycine, Serine and Threonine Metabolism		5086	LC/MS Pos Early	806	1104	104.071	673	1118-68-9	C01026	HMDB00092	1.2691	1.2596		1.26435		1.16375	0.443393		0.226882
1510	dodecanedioate (C12)	Lipid	Fatty Acid, Dicarboxylate		32388	LC/MS Neg	100001102	2990	229.144	12736	693-23-2	C02678	HMDB00623	1	1.0896		1.0448		0.959556	0.382572		0.222818
3961	threonate	Cofactors and Vitamins	Ascorbate and Aldarate Metabolism		27738	LC/MS Polar	100001022	2384	135.03	151152	70753-61-6	C01620	HMDB00943	0.9951	0.9792		0.98715		0.9019	0.384127		0.221932
3960	2-O-methylascorbic acid	Cofactors and Vitamins	Ascorbate and Aldarate Metabolism		63990	LC/MS Neg	100003258	778	189.041	99779	17860-87-6			1.1697	1.1041		1.1369		1.04392	0.419715		0.221522
371	methionine	Amino Acid	Methionine, Cysteine, SAM and Taurine Metabolism		1302	LC/MS Pos Early	415	2526	150.058	6137	63-68-3	C00073	HMDB00696	1.0735	1.0691		1.0713		1.03279	0.17442		0.220801
	X - 25519				62963	LC/MS Pos Early		1187.7	338.156					1.6468	0.9733		1.31005		1.1767	0.614407		0.217032
246	N-formylanthranilic acid	Amino Acid	Tryptophan Metabolism		43549	LC/MS Polar	100004561	900	164.035	101399	3342-77-6	C05653	HMDB04089	1.0094	1.009		1.0092		0.942816	0.321853		0.206256
	X - 24953				57720	LC/MS Neg		5342	439.343					1.2393	1.159		1.19915		1.02622	0.84327		0.205066
3755	allantoin	Nucleotide	Purine Metabolism, (Hypo)Xanthine/Inosine containing		1107	LC/MS Polar	1002	1672	157.037	204	97-59-6	C02350	HMDB00462	1.0036	0.9755		0.98955		0.955904	0.165356		0.203476
493	cysteine-glutathione disulfide	Amino Acid	Glutathione Metabolism		35159	LC/MS Pos Early	100001437	2465	427.095	4247235	13081-14-6		HMDB00656	1.1817	1.1493		1.1655		1.05036	0.580199		0.198442
1492	3-hydroxyadipate*	Lipid	Fatty Acid, Dicarboxylate		62069	LC/MS Polar	100004396	3131	161.046	151913			HMDB00345	1.6812	1.6491		1.66515		1.27664	2.00959		0.19333
364	isobutyrylglycine (C4)	Amino Acid	Leucine, Isoleucine and Valine Metabolism		35437	LC/MS Neg	100001590	1420	144.067	10855600	15926-18-8		HMDB00730	0.7701	1		0.88505		0.809584	0.403325		0.187109
1735	2-hydroxypalmitate	Lipid	Fatty Acid, Monohydroxy		35675	LC/MS Neg	100001579	5511.2	271.228	92836	764-67-0		HMDB31057	1.244	0.9083		1.07615		1.02875	0.2555		0.18551
1332	caprate (10:0)	Lipid	Medium Chain Fatty Acid		1642	LC/MS Neg	888	5090.7	171.139	2969	334-48-5	C01571	HMDB00511	1.1119	1.2387		1.1753		1.07309	0.559488		0.182688
	X - 24411				52640	LC/MS Pos Early		1171	116.07					1.188	1.004		1.096		1.04878	0.299209		0.157803
355	N-acetylvaline	Amino Acid	Leucine, Isoleucine and Valine Metabolism		1591	LC/MS Neg	1084	1704	158.082	66789	96-81-1		HMDB11757	1.0762	0.9743		1.02525		0.992716	0.207542		0.156759
76	imidazole propionate	Amino Acid	Histidine Metabolism		40730	LC/MS Pos Early	100003434	2263	141.066	70630	1074-59-5		HMDB02271	1.8591	1.915		1.88705		1.56624	2.10487		0.152415
1288	isocitric lactone	Energy	TCA Cycle		54724	LC/MS Polar	100009239	2970	173.009	98259	4702-32-3			0.5954	1.2242		0.9098		0.828352	0.542466		0.150144
1483	glutarate (C5-DC)	Lipid	Fatty Acid, Dicarboxylate		396	LC/MS Polar	339	2900	131.035	743	110-94-1	C00489	HMDB00661	1.2808	1.2758		1.2783		1.15835	0.814871		0.147204
	X - 12100				47687	LC/MS Pos Early		2650	221.092					1.0437	0.9963		1.02		0.993796	0.190648		0.137447
1291	succinylcarnitine (C4-DC)	Energy	TCA Cycle		37058	LC/MS Pos Early	100001948	2291	262.128	71464481	256928-74-2		HMDB61717	1.1211	1.0069		1.064		1.02514	0.287816		0.135031
1798	2R,3R-dihydroxybutyrate	Lipid	Fatty Acid, Dihydroxy		63109	LC/MS Polar	100002367	1543	119.035	13120901	759-06-8		HMDB00498	1.1568	1.171		1.1639		1.10252	0.473669		0.129584
72	N-acetyl-1-methylhistidine*	Amino Acid	Histidine Metabolism		43255	LC/MS Pos Early	100004299	2100	212.103	53859791				1.0657	1.1301		1.0979		1.00456	0.765265		0.121966
1703	deoxycarnitine	Lipid	Carnitine Metabolism		36747	LC/MS Pos Early	100001662	2052	146.118	134	6249-56-5	C01181	HMDB01161	1.0785	1.0113		1.0449		1.01171	0.276932		0.119842
	X - 17328				47818	LC/MS Pos Late		910	308.185					3.2538	2.9845		3.11915		2.63268	4.18853		0.116144
552	gamma-glutamylglycine	Peptide	Gamma-glutamyl Amino Acid		33949	LC/MS Pos Early	100001294	1535	205.082	165527	1948-29-4		HMDB11667	1.0947	0.9891		1.0419		0.999	0.369677		0.116047
1473	2-hydroxyphytanate*	Lipid	Fatty Acid, Branched		61702	LC/MS Neg	100004414	5751	327.291	189026	14721-68-7			1.1621	1.1065		1.1343		1.06827	0.578121		0.114211
1512	dodecenedioate (C12:1-DC)*	Lipid	Fatty Acid, Dicarboxylate		61864	LC/MS Neg	100019972	2700	227.129					0.764	1.1222		0.9431		0.90112	0.369515		0.113608
	X - 23593				49469	LC/MS Pos Early		1531	191.102					1.1087	1.047		1.07785		1.03768	0.37065		0.108388
	X - 24432				52662	LC/MS Pos Early		618	210.061					0.9639	0.7772		0.87055		0.82452	0.475592		0.0967847
	X - 24431				52661	LC/MS Pos Early		566	210.06					1.0663	0.9956		1.03095		0.987796	0.447577		0.096417
305	isovalerylglycine	Amino Acid	Leucine, Isoleucine and Valine Metabolism		35107	LC/MS Neg	100001452	1950	158.082	546304	16284-60-9		HMDB00678	0.9793	0.9961		0.9877		0.956164	0.382701		0.0824037
1	glycine	Amino Acid	Glycine, Serine and Threonine Metabolism		58	LC/MS Pos Early	340	1375	76.0393	750	56-40-6	C00037	HMDB00123	1.0791	1.0384		1.05875		1.03317	0.336874		0.0759394
1505	sebacate (C10-DC)	Lipid	Fatty Acid, Dicarboxylate		32398	LC/MS Polar	100001211	2147	201.113	5192	111-20-6	C08277	HMDB00792	1.0527	1		1.02635		0.991264	0.493505		0.0710956
	X - 23787				49688	LC/MS Neg		4343	383.153					1.276	1.1006		1.1883		1.12827	0.846125		0.0709493
1982	glycerophosphoethanolamine	Lipid	Phospholipid Metabolism		37455	LC/MS Pos Early	100001620	659	216.063	123874	33049-08-0	C01233	HMDB00114	1.0231	0.8876		0.95535		0.935324	0.290847		0.068854
1274	N-acetylglucosaminylasparagine	Carbohydrate	Aminosugar Metabolism		48149	LC/MS Pos Early	1215	1212	336.14	123826	2776-93-4	C04540	HMDB00489	1.086	1.0048		1.0454		1.01475	0.450821		0.0679827
130	phenylalanine	Amino Acid	Phenylalanine Metabolism		64	LC/MS Pos Early	460	2878	166.086	6140	63-91-2	C00079	HMDB00159	1.0096	0.9993		1.00445		0.9979	0.0983595		0.0665925
4680	caffeic acid sulfate	Xenobiotics	Food Component/Plant		53254	LC/MS Polar	100009337	1307	258.992				HMDB41708	1.0487	1.097		1.07285		1.00174	1.10687		0.0642443
409	succinoyltaurine	Amino Acid	Methionine, Cysteine, SAM and Taurine Metabolism		63678	LC/MS Polar	100021220	2572	224.023					1.1821	0.9833		1.0827		1.03679	0.737516		0.0622522
1631	picolinoylglycine	Lipid	Fatty Acid Metabolism (Acyl Glycine)		63057	LC/MS Polar	100021198	1167	179.046	11788622	5616-29-5		HMDB59766	1.1557	1.1593		1.1575		1.12169	0.585427		0.0611656
54	beta-citrylglutamate	Amino Acid	Glutamate Metabolism		54923	LC/MS Neg	100003271	530	320.062	72715786	73590-26-8	C20775		1.0187	0.9857		1.0022		0.984308	0.309912		0.0577326
3841	2'-O-methyluridine	Nucleotide	Pyrimidine Metabolism, Uracil containing		57655	LC/MS Neg	100010896	1831	257.078	102212	2140-76-3			0.9093	1.0107		0.96		0.944116	0.27533		0.0576908
4052	pyridoxal	Cofactors and Vitamins	Vitamin B6 Metabolism		1651	LC/MS Pos Early	491	2343	168.065	1050	65-22-5	C00250	HMDB01545	1.1289	0.9579		1.0434		1.02996	0.247991		0.0542116
1723	arachidonoylcholine	Lipid	Fatty Acid Metabolism (Acyl Choline)		53261	LC/MS Pos Late	100009332	1390	390.337					1.2171	1.0242		1.12065		1.0698	0.966388		0.0526227
30	N-acetylalanine	Amino Acid	Alanine and Aspartate Metabolism		1585	LC/MS Polar	1110	1564.8	130.051	88064	97-69-8	C02847	HMDB00766	1.0831	1.0773		1.0802		1.07078	0.187468		0.0502486
391	cysteine	Amino Acid	Methionine, Cysteine, SAM and Taurine Metabolism		1868	LC/MS Pos Early	800	1475	122.027	5862	52-90-4;56-89-3	C00097	HMDB00574	0.9783	1.0453		1.0118		1.00213	0.205894		0.0469561
1663	5-dodecenoylcarnitine (C12:1)	Lipid	Fatty Acid Metabolism (Acyl Carnitine, Monounsaturated)		61769	LC/MS Pos Late	100016069	1135	342.264				HMDB13326	1.3212	1.2066		1.2639		1.22514	0.833463		0.0465048
	X - 23639				49515	LC/MS Pos Early		1640	134.081					1.1044	0.9796		1.042		1.02694	0.332456		0.0452992
3089	taurocholate	Lipid	Primary Bile Acid Metabolism		18497	LC/MS Neg	1648	5150	514.284	6675	145-42-6	C05122	HMDB00036	1.1964	1.1923		1.19435		1.1301	1.49849		0.0428764
3108	glycochenodeoxycholate 3-sulfate	Lipid	Primary Bile Acid Metabolism		52974	LC/MS Neg	100006641	4820	263.628					1.0487	0.9837		1.0162		0.994912	0.522321		0.0407565
1285	aconitate [cis or trans]	Energy	TCA Cycle		46173	LC/MS Neg	100001359	580	173.009					1.1263	1.0076		1.06695		1.05526	0.290427		0.0402373
	X - 23974				49883	LC/MS Neg		4995.3	197.118					1.2856	1.0023		1.14395		1.12596	0.458966		0.0392056
422	2-oxoarginine*	Amino Acid	Urea cycle; Arginine and Proline Metabolism		55072	LC/MS Pos Early	100002784	1760	174.087	558	3715-10-04	C03771	HMDB04225	1.2219	0.8513		1.0366		1.00488	0.82884		0.0382703
3029	androstenediol (3beta,17beta) monosulfate (2)	Lipid	Androgenic Steroids		37210	LC/MS Neg	100002029	4500	369.174					1.0382	0.9765		1.00735		0.987584	0.526261		0.0375593
6	betaine	Amino Acid	Glycine, Serine and Threonine Metabolism		3141	LC/MS Pos Early	799	1064	118.086	247	107-43-7	C00719	HMDB00043	1.0677	1.0179		1.0428		1.03568	0.227047		0.0313416
74	trans-urocanate	Amino Acid	Histidine Metabolism		607	LC/MS Pos Early	537	2285	139.05	736715	104-98-3	C00785	HMDB00301	1.092	1.0102		1.0511		1.03598	0.546786		0.0276598
1198	mannitol/sorbitol	Carbohydrate	Fructose, Mannose and Galactose Metabolism		46142	LC/MS Polar	100001740	2320	181.072	5780		C00794	HMDB00247	3.2408	3.1495		3.19515		2.99016	8.62064		0.0237794
1783	3-hydroxystearate	Lipid	Fatty Acid, Monohydroxy		52938	LC/MS Neg	100008933	5674	299.259	5282907	45261-96-9			0.4932	0.9863		0.73975		0.731716	0.384076		0.0209177
100	N6-acetyllysine	Amino Acid	Lysine Metabolism		36752	LC/MS Neg	100001734	1059	187.109	92832	692-04-6	C02727	HMDB00206	1.0526	0.9858		1.0192		1.0159	0.209953		0.0157368
	X - 21383				46428	LC/MS Neg		2448	223.098					1.1164	1.0808		1.0986		1.08559	0.959872		0.013556
339	2-methylbutyrylcarnitine (C5)	Amino Acid	Leucine, Isoleucine and Valine Metabolism		45095	LC/MS Pos Early	100001509	3050	246.17	6426901	31023-25-3		HMDB00378	1.0025	0.9717		0.9871		0.983156	0.3145		0.0125405
4311	gluconate	Xenobiotics	Food Component/Plant		587	LC/MS Polar	338	2922	195.051	10690	527-07-1	C00257	HMDB00625	1.1375	1.0486		1.09305		1.08738	0.52215		0.0108666
	X - 21339				46384	LC/MS Neg		5105	453.323					1.2081	1.1635		1.1858		1.1804	0.811047		0.00665806
342	tiglyl carnitine (C5)	Amino Acid	Leucine, Isoleucine and Valine Metabolism		35428	LC/MS Pos Early	100001597	2962	244.154	22833596	64191-86-2		HMDB02366	0.9517	1.02		0.98585		0.984664	0.341424		0.00347369
	X - 25810				63592	LC/MS Pos Early		1927	144.102					1.3809	1.1337		1.2573		1.25358	1.14353		0.00325657
304	isovalerate (C5)	Amino Acid	Leucine, Isoleucine and Valine Metabolism		44656	LC/MS Neg	100000708	1564	101.061	10430	503-74-2	C08262	HMDB00718	1.235	0.9546		1.0948		1.09378	0.465103		0.00220166
1357	palmitoleate (16:1n7)	Lipid	Long Chain Monounsaturated Fatty Acid		33447	LC/MS Neg	452	5475	253.217	445638	373-49-9	C08362	HMDB03229	1.6342	1.5865		1.61035		1.60846	1.51527		0.0012473
376	methionine sulfoxide	Amino Acid	Methionine, Cysteine, SAM and Taurine Metabolism		18374	LC/MS Pos Early	100000039	1272	166.053	158980	3226-65-1	C02989	HMDB02005	1.0164	1.0353		1.02585		1.02606	0.400015		-0.000524981
1219	galactonate	Carbohydrate	Fructose, Mannose and Galactose Metabolism		27719	LC/MS Polar	100001026	3085	195.051	128869	299-28-5	C00880	HMDB00565	1.1185	1.2788		1.19865		1.20214	1.57478		-0.00221872
1527	eicosenedioate (C20:1-DC)*	Lipid	Fatty Acid, Dicarboxylate		62923	LC/MS Neg	100021105	5095	339.254					1.1163	0.9402		1.02825		1.03232	0.407151		-0.0100061
2946	pregnenetriol disulfate*	Lipid	Pregnenolone Steroids		62921	LC/MS Neg	100021104	3504	246.075					1.1517	1.1012		1.12645		1.13324	0.656795		-0.0103381
1600	hexanoylglutamine	Lipid	Fatty Acid Metabolism (Acyl Glutamine)		54907	LC/MS Neg	100001733	2780	243.135					1.1337	1.1188		1.12625		1.13913	1.0092		-0.0127607
	X - 16944				46683	LC/MS Neg		3718	141.092					1.2169	1.1379		1.1774		1.1892	0.674453		-0.0175016
3990	gamma-tocopherol/beta-tocopherol	Cofactors and Vitamins	Tocopherol Metabolism		52473	LC/MS Pos Late	100008998	2384	416.364					1.1576	1.1139		1.13575		1.15002	0.73028		-0.0195459
558	gamma-glutamylmethionine	Peptide	Gamma-glutamyl Amino Acid		44872	LC/MS Pos Early	100001313	2640	279.101	7009567	17663-87-5		HMDB29155	0.9887	1.0097		0.9992		1.00444	0.25368		-0.0206559
4110	4-vinylphenol sulfate	Xenobiotics	Benzoate Metabolism		36098	LC/MS Neg	100001755	3320	199.007	6426766	2628-17-3	C05627	HMDB62775	1.9274	1.8834		1.9054		1.97128	2.916		-0.0225926
1978	glycerophosphorylcholine (GPC)	Lipid	Phospholipid Metabolism		15990	LC/MS Pos Early	100000269	672	258.11	71920	28319-77-9	C00670	HMDB00086	1.2262	0.9473		1.08675		1.1006	0.577654		-0.0239763
1801	3,4-dihydroxybutyrate	Lipid	Fatty Acid, Dihydroxy		62952	LC/MS Polar	100001730	2204	119.035		51267-44-8			1.0695	1.1023		1.0859		1.09964	0.528158		-0.0260225
186	3-methoxytyrosine	Amino Acid	Tyrosine Metabolism		12017	LC/MS Pos Early	1342	2555	212.092	1670	300-48-1		HMDB01434	1.145	0.9675		1.05625		1.06658	0.377931		-0.0273225
1112	ribitol	Carbohydrate	Pentose Metabolism		15772	LC/MS Polar	100000406	1789.6	151.061	6912	488-81-3	C00474	HMDB00508	1.0974	1.1301		1.11375		1.12974	0.545434		-0.0293088
28	alanine	Amino Acid	Alanine and Aspartate Metabolism		1126	LC/MS Pos Early	811	1700	90.055	5950	56-41-7	C00041	HMDB00161	1.0166	1		1.0083		1.01564	0.242503		-0.0302512
555	gamma-glutamylleucine	Peptide	Gamma-glutamyl Amino Acid		18369	LC/MS Pos Early	1268	2991	261.144	151023	2566-39-4		HMDB11171	1.0273	0.9815		1.0044		1.01472	0.336447		-0.0306854
89	1-ribosyl-imidazoleacetate*	Amino Acid	Histidine Metabolism		61868	LC/MS Pos Early	100001668	2006	259.092	5117448	29605-99-0	C05131	HMDB02331	1.0016	0.8988		0.9502		0.963356	0.404799		-0.0325001
44	alpha-ketoglutaramate*	Amino Acid	Glutamate Metabolism		62101	LC/MS Polar	100002397	1916	144.03	48	18465-19-5			1.0337	0.9333		0.9835		0.99178	0.2484		-0.0333334
	X - 21736				46905	LC/MS Neg		3345	183.139					1.4461	1.3756		1.41085		1.47157	1.769		-0.0343233
4458	mannonate*	Xenobiotics	Food Component/Plant		62864	LC/MS Polar	100003695	2736	195.051	3246006	642-99-9			1.2101	1.1507		1.1804		1.20545	0.709164		-0.0353261
272	indoleacetylglutamine	Amino Acid	Tryptophan Metabolism		42087	LC/MS Pos Early	100001731	2185	304.129	25200879			HMDB13240	1.1099	1.0859		1.0979		1.1434	1.13243		-0.0401789
	X - 13684				47790	LC/MS Pos Early		1642	242.015					1.171	0.9947		1.08285		1.10563	0.53868		-0.0422923
4610	2-keto-3-deoxy-gluconate	Xenobiotics	Food Component/Plant		48141	LC/MS Polar	100005946	1900	177.041	161227	17510-99-5	C00204	HMDB01353	1.0906	0.9856		1.0381		1.05788	0.458037		-0.0431843
5444	glutamine conjugate of C7H12O2*	Partially Characterized Molecules	Partially Characterized Molecules		63658	LC/MS Neg	100020259	3053	255.135					1.9124	1.9616		1.937		2.15433	4.03351		-0.0538816
290	N-acetylleucine	Amino Acid	Leucine, Isoleucine and Valine Metabolism		1587	LC/MS Neg	1082	2400	172.098	70912	1188-21-2	C02710	HMDB11756	0.8442	1.1045		0.97435		0.998196	0.437841		-0.0544627
	X - 17335				47820	LC/MS Pos Late		1052	248.168					1.4878	0.5211		1.00445		1.03614	0.560046		-0.0565775
354	valine	Amino Acid	Leucine, Isoleucine and Valine Metabolism		1649	LC/MS Pos Early	566	2479	118.086	6287	72-18-4	C00183	HMDB00883	1.0083	0.9965		1.0024		1.01642	0.246707		-0.0568286
	X - 12740				46627	LC/MS Neg		2497	287.023					1.5331	1.4025		1.4678		1.59347	2.07896		-0.0604495
1531	3-carboxy-4-methyl-5-pentyl-2-furanpropionate (3-CMPFP)	Lipid	Fatty Acid, Dicarboxylate		61871	LC/MS Neg	100020004	4000	267.124	194501				1.101	1.0158		1.0584		1.09556	0.595195		-0.0624333
3011	16a-hydroxy DHEA 3-sulfate	Lipid	Androgenic Steroids		38168	LC/MS Neg	100002126	4240	383.153					1.3072	1.1949		1.25105		1.3156	0.993228		-0.0649901
1672	linoleoylcarnitine (C18:2)*	Lipid	Fatty Acid Metabolism (Acyl Carnitine, Polyunsaturated)		46223	LC/MS Pos Late	100003151	1430	424.342	6450015	36816-10-1		HMDB06469	1.0961	0.9635		1.0298		1.0541	0.362582		-0.0670084
1731	2-hydroxyoctanoate	Lipid	Fatty Acid, Monohydroxy		22036	LC/MS Neg	100000743	3736.8	159.103	94180	617-73-2		HMDB02264	1.2001	1.071		1.13555		1.19019	0.809855		-0.0674713
4012	heme	Cofactors and Vitamins	Hemoglobin and Porphyrin Metabolism		41754	LC/MS Pos Late	100001386	1124	616.176	26945	14875-96-8	C00032	HMDB03178	1.102	2.2005		1.65125		1.80416	2.20791		-0.0692538
1330	caprylate (8:0)	Lipid	Medium Chain Fatty Acid		32492	LC/MS Neg	932	4362	143.108	379	124-07-2	C06423	HMDB00482	1.1482	1.0427		1.09545		1.14246	0.675525		-0.0695843
	X - 16964				46685	LC/MS Neg		3034	174.06					1.0231	1.0083		1.0157		1.02478	0.128339		-0.07075
124	6-oxopiperidine-2-carboxylate	Amino Acid	Lysine Metabolism		43231	LC/MS Neg	100004499	965	142.051	3014237	34622-39-4		HMDB61705	1.2499	1.0092		1.12955		1.17067	0.527716		-0.0779245
10	N-acetylserine	Amino Acid	Glycine, Serine and Threonine Metabolism		37076	LC/MS Polar	100001851	2000	146.046	65249	97-14-3		HMDB02931	0.9976	1.0677		1.03265		1.05051	0.224688		-0.0794789
5293	EDTA	Xenobiotics	Chemical		22163	LC/MS Neg	100001002	643	291.083	6049	60-00-4	C00284	HMDB15109	1.0717	1.0136		1.04265		1.06711	0.306828		-0.0797124
4407	quinate	Xenobiotics	Food Component/Plant		18335	LC/MS Polar	100000442	2432.9	191.056	6508	77-95-2	C00296	HMDB03072	1.4054	1.4263		1.41585		1.61603	2.46127		-0.0813312
	X - 24970				57754	LC/MS Pos Early		2468	161.128					1.8474	1.8207		1.83405		2.4458	6.82314		-0.0896581
366	2,3-dihydroxy-2-methylbutyrate	Amino Acid	Leucine, Isoleucine and Valine Metabolism		57547	LC/MS Polar	100010869	1318	133.051	301941	14868-24-7		HMDB29576	0.801	1.2637		1.03235		1.216	2.0453		-0.0897912
	X - 11858				47654	LC/MS Neg		4414	437.055					1.035	0.965		1		1.33471	3.7017		-0.09042
	X - 24544				52865	LC/MS Neg		4448	411.184					1.0351	1.0261		1.0306		1.08194	0.566875		-0.0905738
5292	ectoine	Xenobiotics	Chemical		35651	LC/MS Pos Early	100001635	1980	143.082	126041	96702-03-3	C06231		1.0533	0.9597		1.0065		1.09782	0.947704		-0.096355
1089	pyruvate	Carbohydrate	Glycolysis, Gluconeogenesis, and Pyruvate Metabolism		48990	LC/MS Polar	823	1083	87.0088	1060	127-17-3	C00022	HMDB00243	1.0865	1.0188		1.05265		1.09765	0.459995		-0.0978314
	X - 23662				49539	LC/MS Pos Early		2622	159.149					0.4923	0.902		0.69715		0.774044	0.740854		-0.103791
3745	xanthine	Nucleotide	Purine Metabolism, (Hypo)Xanthine/Inosine containing		3147	LC/MS Polar	1004	2023	151.026	1188	69-89-6	C00385	HMDB00292	1.0333	0.998		1.01565		1.05471	0.357915		-0.109126
3967	alpha-CMBHC glucuronide	Cofactors and Vitamins	Tocopherol Metabolism		63926	LC/MS Neg	100005977	3664	495.224					0.8866	0.7471		0.81685		0.884944	0.620518		-0.109737
358	1-carboxyethylvaline	Amino Acid	Leucine, Isoleucine and Valine Metabolism		62562	LC/MS Neg	100020423	2008	188.093					1.1837	1.1235		1.1536		1.28131	1.0922		-0.116931
1394	linoleate (18:2n6)	Lipid	Long Chain Polyunsaturated Fatty Acid (n3 and n6)		1105	LC/MS Neg	180	5535	279.233	5280450	60-33-3	C01595	HMDB00673	1.1222	1.0472		1.0847		1.1768	0.782386		-0.117717
	X - 21740				46909	LC/MS Neg		3613	188.075					1.0465	0.9529		0.9997		1.01637	0.140858		-0.118332
3958	ascorbic acid 3-sulfate*	Cofactors and Vitamins	Ascorbate and Aldarate Metabolism		63687	LC/MS Polar	100020409	2025	254.982	11425365				0.9742	1.0756		1.0249		1.08506	0.500484		-0.120204
1133	arabonate/xylonate	Carbohydrate	Pentose Metabolism		48255	LC/MS Polar	100006115	2700	165.041					1.026	1.0769		1.05145		1.12889	0.641733		-0.12067
3166	3b-hydroxy-5-cholenoic acid	Lipid	Secondary Bile Acid Metabolism		43507	LC/MS Neg	100004182	5205	373.275	92997	5255-17-4		HMDB00308	1.0663	0.8805		0.9734		1.02808	0.4432		-0.123376
131	N-acetylphenylalanine	Amino Acid	Phenylalanine Metabolism		33950	LC/MS Neg	100001256	2597	206.082	74839	2018-61-3	C03519	HMDB00512	1.0513	0.9692		1.01025		1.06237	0.407352		-0.127953
	X - 16397				47802	LC/MS Pos Early		2809	248.095					0.8974	1.0114		0.9544		1.01387	0.451547		-0.131698
1093	glycerate	Carbohydrate	Glycolysis, Gluconeogenesis, and Pyruvate Metabolism		1572	LC/MS Polar	1052	2070.4	105.019	752	600-19-1	C00258	HMDB00139	0.9433	0.951		0.94715		0.98118	0.253152		-0.134425
136	1-carboxyethylphenylalanine	Amino Acid	Phenylalanine Metabolism		62566	LC/MS Neg	100020419	2844	236.093					1.1694	1.1017		1.13555		1.27076	0.990736		-0.136474
5475	branched-chain, straight-chain, or cyclopropyl 12:1 fatty acid*	Partially Characterized Molecules	Partially Characterized Molecules		63683	LC/MS Neg	100021709	5261	197.155					1.0163	0.9851		1.0007		1.08765	0.635367		-0.136853
250	xanthurenate	Amino Acid	Tryptophan Metabolism		15679	LC/MS Neg	100000015	1476	204.03	5699	59-007	C02470	HMDB00881	0.8542	0.8224		0.8383		0.89106	0.375823		-0.140385
1642	nonanoylcarnitine (C9)	Lipid	Fatty Acid Metabolism (Acyl Carnitine, Medium Chain)		61775	LC/MS Pos Late	100006620	1003	302.233				HMDB13288	0.8694	0.8166		0.843		0.905368	0.433988		-0.143709
1275	erythronate*	Carbohydrate	Aminosugar Metabolism		42420	LC/MS Polar	100001320	2186	135.03	2781043	88759-55-1		HMDB00613	0.997	0.985		0.991		1.0315	0.276709		-0.146348
1137	ribulonate/xylulonate/lyxonate*	Carbohydrate	Pentose Metabolism		61858	LC/MS Polar	100019968	2350	165.041					0.5785	0.823		0.70075		0.735244	0.232402		-0.148424
1331	pelargonate (9:0)	Lipid	Medium Chain Fatty Acid		12035	LC/MS Neg	437	4798	157.123	8158	112-05-0	C01601	HMDB00847	0.9978	1.1217		1.05975		1.10564	0.308156		-0.148931
1593	butyrylglycine (C4)	Lipid	Fatty Acid Metabolism (also BCAA Metabolism)		31850	LC/MS Neg	100001151	1470	144.067	88412	20208-73-5		HMDB00808	0.5637	0.8819		0.7228		0.828144	0.699036		-0.150699
4163	5-acetylamino-6-amino-3-methyluracil	Xenobiotics	Xanthine Metabolism		34424	LC/MS Polar	100001403	1710	197.068	88299	1196153-01-1	C16366	HMDB04400	1.0405	1.0914		1.06595		1.17834	0.744292		-0.151008
1283	citrate	Energy	TCA Cycle		1564	LC/MS Neg	1124	582	191.02	311	77-92-9	C00158	HMDB00094	1.0251	0.9818		1.00345		1.03205	0.186446		-0.153406
426	proline	Amino Acid	Urea cycle; Arginine and Proline Metabolism		1898	LC/MS Pos Early	480	1603	116.071	145742	147-85-3	C00148	HMDB00162	1.0725	1.004		1.03825		1.08863	0.325676		-0.154687
375	methionine sulfone	Amino Acid	Methionine, Cysteine, SAM and Taurine Metabolism		44878	LC/MS Pos Early	100004635	1250	182.048	69961	820-10-0			1.0622	0.9375		0.99985		1.06402	0.406299		-0.157948
1660	3-decenoylcarnitine	Lipid	Fatty Acid Metabolism (Acyl Carnitine, Monounsaturated)		63361	LC/MS Pos Late	100021136	1045	314.233					0.9522	1.1216		1.0369		1.11795	0.489492		-0.165576
	X - 12007				46610	LC/MS Neg		1357	222.992					0.8915	0.9125		0.902		1.13493	1.36109		-0.171134
1693	octadecanedioylcarnitine (C18-DC)*	Lipid	Fatty Acid Metabolism (Acyl Carnitine, Dicarboxylate)		61867	LC/MS Pos Late	100005998	1227	458.348		123233-50-1			1.0158	0.9215		0.96865		1.03961	0.413285		-0.171693
52	pyroglutamine*	Amino Acid	Glutamate Metabolism		46225	LC/MS Pos Early	100001540	1900	129.066	134508	2353-44-8			1.1508	1.1078		1.1293		1.28512	0.900575		-0.173027
	X - 22771				48076	LC/MS Neg		2180	160.044					0.9867	1.0312		1.00895		1.03105	0.123185		-0.179388
1199	mannose	Carbohydrate	Fructose, Mannose and Galactose Metabolism		48153	LC/MS Polar	803	2200	225.062	18950	3458-28-4	C00159	HMDB00169	1.0863	1.1216		1.10395		1.25766	0.836389		-0.183773
32	N,N-dimethylalanine	Amino Acid	Alanine and Aspartate Metabolism		63151	LC/MS Pos Early	100020371	1370	118.086	5488191	2812-31-9			1.309	1.0458		1.1774		1.46038	1.53246		-0.18466
1384	stearidonate (18:4n3)	Lipid	Long Chain Polyunsaturated Fatty Acid (n3 and n6)		33969	LC/MS Neg	100001229	5395	275.202	5312508	111174-40-4	C16300	HMDB06547	1.1528	0.8964		1.0246		1.1643	0.753428		-0.185419
175	4-methoxyphenol sulfate	Amino Acid	Tyrosine Metabolism		48457	LC/MS Neg	100006262	2412	203.002		3233-60-1			1.0279	1.1718		1.09985		1.27112	0.922964		-0.18557
1459	(12 or 13)-methylmyristate (a15:0 or i15:0)	Lipid	Fatty Acid, Branched		38293	LC/MS Neg	100002344	5499	241.217	151014	2485-71-4			1.0662	0.861		0.9636		1.08564	0.652248		-0.187101
4059	2-hydroxyhippurate (salicylurate)	Xenobiotics	Benzoate Metabolism		18281	LC/MS Neg	1869	2184	194.046	10253	487-54-7	C07588	HMDB00840	1.1252	1.1272		1.1262		1.83301	3.75109		-0.188429
441	hydroxyproline	Amino Acid	Urea cycle; Arginine and Proline Metabolism		32306	LC/MS Pos Early	1001	1064	132.065	5810	51-35-4	C01157	HMDB00725	1.0784	0.9997		1.03905		1.12512	0.454984		-0.189171
2419	1-oleoyl-GPG (18:1)*	Lipid	Lysophospholipid		45968	LC/MS Neg	100005716	5610	509.288					0.4037	0.9239		0.6638		0.746968	0.438435		-0.189693
1310	phosphate	Energy	Oxidative Phosphorylation		42109	LC/MS Pos Early	461	576	98.9842	1061	7664-38-2	C00009	HMDB01429	0.8769	0.9403		0.9086		0.942188	0.176419		-0.190388
1518	tetradecadienedioate (C14:2-DC)*	Lipid	Fatty Acid, Dicarboxylate		62918	LC/MS Neg	100021100	3148	253.144					0.7717	0.9377		0.8547		0.979056	0.648471		-0.191768
1127	arabitol/xylitol	Carbohydrate	Pentose Metabolism		48885	LC/MS Polar	100006430	1932.4	151.061					1.0783	1.0245		1.0514		2.75801	8.7862		-0.194238
	X - 25419				62716	LC/MS Pos Early		1629.2	129.066					1.0835	0.9165		1		1.15364	0.790308		-0.19441
5290	dimethyl sulfone	Xenobiotics	Chemical		43424	LC/MS Pos Early	100004284	832	95.0161	6213	67-71-0	C11142	HMDB04983	0.4594	0.9144		0.6869		0.8499	0.837952		-0.194522
254	picolinate	Amino Acid	Tryptophan Metabolism		1512	LC/MS Pos Early	1022	910	124.039	1018	98-98-6	C10164	HMDB02243	1.009	0.7506		0.8798		0.953472	0.377378		-0.195221
5003	ranitidine N-oxide*	Xenobiotics	Drug - Gastrointestinal		62485	LC/MS Pos Early	100020810	2926	331.144	3033888				0.4856	0.4856		0.4856		0.526752	0.20576		-0.2
5131	cetirizine	Xenobiotics	Drug - Respiratory		54745	LC/MS Pos Late	100009034	1052	389.163	2678	83881-51-0	C07778	HMDB05032	0.2143	0.2143		0.2143		0.277156	0.31428		-0.2
4775	3-(cystein-S-yl)acetaminophen*	Xenobiotics	Drug - Analgesics, Anesthetics		34365	LC/MS Pos Early	100001797	2420	271.075	5233914				0.1359	0.1359		0.1359		0.170464	0.17282		-0.2
	X - 21803				46980	LC/MS Neg		2035	212.003					0.0604	0.0604		0.0604		0.135568	0.37584		-0.2
5002	ranitidine	Xenobiotics	Drug - Gastrointestinal		38595	LC/MS Pos Early	100002735	2910	315.149	3001055	66357-59-3	D00422	HMDB01930	0.3756	0.3756		0.3756		0.425552	0.24976		-0.2
1359	10-heptadecenoate (17:1n7)	Lipid	Long Chain Monounsaturated Fatty Acid		33971	LC/MS Neg	100001278	5555	267.233	5312435	29743-97-3		HMDB60038	1.1273	1.1179		1.1226		1.34775	1.11638		-0.201676
1517	branched chain 14:0 dicarboxylic acid	Lipid	Fatty Acid, Dicarboxylate		63191	LC/MS Neg	100021374	3849	257.176					0.917	0.8609		0.88895		1.03056	0.694918		-0.203785
	X - 25343				62636	LC/MS Pos Early		1043.1	226.082					1.1226	0.4669		0.79475		0.90562	0.541357		-0.2048
465	N-acetylputrescine	Amino Acid	Polyamine Metabolism		37496	LC/MS Pos Early	192	2230	131.118	122356	18233-70-0	C02714	HMDB02064	1.0509	1.0123		1.0316		1.10356	0.350935		-0.205064
4398	erythritol	Xenobiotics	Food Component/Plant		20699	LC/MS Polar	100000846	1491	167.056	222285	149-32-6	C00503	HMDB02994	0.9482	0.985		0.9666		4.08349	15.1936		-0.205145
1722	docosahexaenoylcholine	Lipid	Fatty Acid Metabolism (Acyl Choline)		53263	LC/MS Pos Late	100009333	1378	414.337					0.9448	1		0.9724		1.26935	1.43324		-0.207189
548	gamma-glutamylalanine	Peptide	Gamma-glutamyl Amino Acid		37063	LC/MS Pos Early	100001843	1986	219.098	440103	5875-41-2		HMDB29142	0.9709	1.0067		0.9888		1.08242	0.449257		-0.20838
390	alpha-ketobutyrate	Amino Acid	Methionine, Cysteine, SAM and Taurine Metabolism		4968	LC/MS Polar	796	940	101.024	58	600-18-0	C00109	HMDB00005	1.0571	0.9698		1.01345		1.27627	1.25823		-0.208882
3750	N1-methylinosine	Nucleotide	Purine Metabolism, (Hypo)Xanthine/Inosine containing		48351	LC/MS Pos Early	100001409	1430	283.104	65095	20245-33-4		HMDB02721	1.1241	0.9994		1.06175		1.12167	0.28663		-0.209043
	X - 15666				47800	LC/MS Pos Early		2755	221.092					0.9791	0.9875		0.9833		1.07568	0.441631		-0.20917
4772	2-hydroxyacetaminophen sulfate*	Xenobiotics	Drug - Analgesics, Anesthetics		33173	LC/MS Neg	100001791	1674	246.008	86290013				0.2533	0.2533		0.2533		0.729324	2.21089		-0.215309
1520	hexadecenedioate (C16:1-DC)*	Lipid	Fatty Acid, Dicarboxylate		61862	LC/MS Neg	100019975	4380	283.192					0.9687	0.9192		0.94395		1.09219	0.687783		-0.215536
4773	2-methoxyacetaminophen sulfate*	Xenobiotics	Drug - Analgesics, Anesthetics		47031	LC/MS Neg	100001793	1949	260.023	86290014				0.0739	0.0739		0.0739		0.147988	0.341578		-0.216899
4506	sulfate of piperine metabolite C16H19NO3 (2)*	Xenobiotics	Food Component/Plant		62295	LC/MS Neg	100020496	4112	352.086					1.1121	1		1.05605		1.3078	1.14902		-0.219096
1797	2S,3R-dihydroxybutyrate	Lipid	Fatty Acid, Dihydroxy		62950	LC/MS Polar	100002284	1660	119.035	10964471	5057-93-2		HMDB02453	0.9248	0.9123		0.91855		1.06754	0.679587		-0.219236
3012	androsterone glucuronide	Lipid	Androgenic Steroids		61846	LC/MS Neg	100002761	4953	465.249	114833	1852-43-3	C11135	HMDB02829	0.9873	0.9845		0.9859		1.16131	0.800067		-0.219242
4774	2-methoxyacetaminophen glucuronide*	Xenobiotics	Drug - Analgesics, Anesthetics		33161	LC/MS Neg	100001795	1633	356.099	14367271				0.2415	0.2415		0.2415		0.730032	2.18515		-0.223569
4769	3-(N-acetyl-L-cystein-S-yl) acetaminophen	Xenobiotics	Drug - Analgesics, Anesthetics		45721	LC/MS Neg	2048	2094	311.071	83967	52372-86-8			0.0473	0.0473		0.0473		0.123516	0.337576		-0.225775
5420	glucuronide of C10H18O2 (7)*	Partially Characterized Molecules	Partially Characterized Molecules		61887	LC/MS Neg	100020014	3790	345.156					1.1764	0.9259		1.05115		2.01575	4.25164		-0.226877
126	N-acetyl-cadaverine	Amino Acid	Lysine Metabolism		43530	LC/MS Pos Early	100002249	2385	145.133	189087	32343-73-0		HMDB02284	0.7303	1		0.86515		1.2064	1.49726		-0.227914
1136	sedoheptulose	Carbohydrate	Pentose Metabolism		53237	LC/MS Polar	100002619	2255	209.067	5459879	3019-74-7		HMDB03219	1.2316	0.3503		0.79095		0.975192	0.802287		-0.229646
429	dimethylarginine (ADMA + SDMA)	Amino Acid	Urea cycle; Arginine and Proline Metabolism		36808	LC/MS Pos Early	100001810	2850	203.15	123831	102783-24-4	C03626	HMDB01539	0.9976	1.0039		1.00075		1.04314	0.181755		-0.233248
4771	4-acetamidophenylglucuronide	Xenobiotics	Drug - Analgesics, Anesthetics		15736	LC/MS Neg	100000043	1400	326.088	83944	120595-80-4		HMDB10316	0.0083	0.0083		0.0083		0.555208	2.33883		-0.233838
1090	lactate	Carbohydrate	Glycolysis, Gluconeogenesis, and Pyruvate Metabolism		527	LC/MS Polar	482	1469	89.0244	612	79-33-4	C00186	HMDB00190	1.0094	1.0157		1.01255		1.13486	0.522565		-0.234049
1342	pentadecanoate (15:0)	Lipid	Long Chain Saturated Fatty Acid		1361	LC/MS Neg	980	5521	241.217	13849	1002-84-2;10002-84-2	C16537	HMDB00826	1.0306	1.0077		1.01915		1.13343	0.48742		-0.234455
5465	pentose acid*	Partially Characterized Molecules	Partially Characterized Molecules		63264	LC/MS Polar	100021467	2180	165.041					0.6557	1.2236		0.93965		1.11412	0.740732		-0.235532
2905	beta-sitosterol	Lipid	Sterol		27414	LC/MS Pos Late	100001033	3054	397.383	222284	83-46-5	C01753	HMDB00852	1.0201	0.8862		0.95315		1.08332	0.547965		-0.237544
3928	1-methylnicotinamide	Cofactors and Vitamins	Nicotinate and Nicotinamide Metabolism		27665	LC/MS Pos Early	55	1940	137.071	457	1005-24-9	C02918	HMDB00699	0.9666	0.9691		0.96785		1.06292	0.399058		-0.238236
4768	4-acetamidophenol	Xenobiotics	Drug - Analgesics, Anesthetics		12032	LC/MS Neg	1383	2173.7	150.056	1983	103-90-2	C06804	HMDB01859	0.1097	0.1097		0.1097		0.44102	1.38108		-0.2399
4770	4-acetaminophen sulfate	Xenobiotics	Drug - Analgesics, Anesthetics		37475	LC/MS Neg	2049	1792	230.013	83939	10066-90-7;32113-41-0	C06804	HMDB59911	0.0142	0.0142		0.0142		0.46886	1.88356		-0.241384
3743	inosine	Nucleotide	Purine Metabolism, (Hypo)Xanthine/Inosine containing		1123	LC/MS Neg	361	1602.1	267.074	6021	58-63-9	C00294	HMDB00195	0.895	0.9307		0.91285		0.992844	0.330261		-0.242214
4527	saccharin	Xenobiotics	Food Component/Plant		21151	LC/MS Neg	100000870	2000	181.992	5143	81-07-2	D01085	HMDB29723	0.5788	0.4408		0.5098		4.12224	14.8392		-0.243439
3060	andro steroid monosulfate C19H28O6S (1)*	Lipid	Androgenic Steroids		32827	LC/MS Neg	100002152	3871	383.153			C04555	HMDB02759	1.1809	0.9047		1.0428		1.25496	0.870679		-0.243667
	X - 23590				49466	LC/MS Pos Early		1466	204.086					1.0013	0.8627		0.932		1.0326	0.412466		-0.243899
4284	2-isopropylmalate	Xenobiotics	Food Component/Plant		15667	LC/MS Polar	100000409	2605	175.061	77	3237-44-3	C02504	HMDB00402	0.9165	0.4465		0.6815		2.18711	6.13466		-0.245427
	X - 11795				33140	LC/MS Pos Early		2590	148.097					1.0019	0.8728		0.93735		1.08744	0.600279		-0.250027
1515	tetradecanedioate (C14)	Lipid	Fatty Acid, Dicarboxylate		35669	LC/MS Neg	100001613	3985	257.176	13185	821-38-5		HMDB00872	0.9057	0.992		0.94885		1.06371	0.451572		-0.254361
	X - 25793				63563	LC/MS Pos Early		3023.3	409.054					0.8988	1.0061		0.95245		1.15787	0.798821		-0.257151
382	S-adenosylhomocysteine (SAH)	Amino Acid	Methionine, Cysteine, SAM and Taurine Metabolism		42382	LC/MS Neg	197	1832.4	383.114	439155	979-92-0	C00021	HMDB00939	0.9027	0.5446		0.72365		0.788588	0.251389		-0.258316
1745	3-hydroxyoctanoate	Lipid	Fatty Acid, Monohydroxy		22001	LC/MS Neg	100000773	3446	159.103	26613	88930-08-9		HMDB01954	0.9767	1.0136		0.99515		1.44176	1.706		-0.26179
1399	dihomolinolenate (20:3n3 or 3n6)	Lipid	Long Chain Polyunsaturated Fatty Acid (n3 and n6)		35718	LC/MS Neg	100001739	5596	305.249	5280581	17046-59-2	C03242	HMDB02925	1.1352	0.8246		0.9799		1.125	0.553576		-0.262114
123	pipecolate	Amino Acid	Lysine Metabolism		1444	LC/MS Pos Early	1025	2200	130.086	849	4043-87-2	C00408	HMDB00070	0.7206	0.7		0.7103		2.11945	5.26519		-0.267635
5365	thioproline	Xenobiotics	Chemical		53231	LC/MS Pos Early	100009232	1250	134.027	93176	34592-47-4			0.9157	0.9383		0.927		1.02592	0.368322		-0.268558
1397	dihomolinoleate (20:2n6)	Lipid	Long Chain Polyunsaturated Fatty Acid (n3 and n6)		17805	LC/MS Neg	1231	5730	307.264	6439848	2091-39-6	C16525	HMDB05060	1.0078	0.9741		0.99095		1.17111	0.66718		-0.270029
4497	glucuronide of piperine metabolite C17H21NO3 (3)*	Xenobiotics	Food Component/Plant		62290	LC/MS Neg	100020491	3951	462.177					1.0406	1.2545		1.14755		1.6905	1.97734		-0.274587
1117	xylose	Carbohydrate	Pentose Metabolism		15581	LC/MS Polar	826	1727	195.051	135191	609-06-3	C00181	HMDB00098	0.27	1.0693		0.66965		0.922356	0.908532		-0.278148
	X - 19438				46261	LC/MS Neg		1209	217.072					0.9291	0.8604		0.89475		1.20929	1.12585		-0.279383
1326	butyrate (4:0)	Lipid	Short Chain Fatty Acid		40605	LC/MS Neg	1143	1062	87.0452	264	109-92-6	C00246	HMDB00039	1.4893	0.2273		0.8583		0.98896	0.466784		-0.279915
4053	pyridoxate	Cofactors and Vitamins	Vitamin B6 Metabolism		31555	LC/MS Neg	100001121	2185	182.046	6723	82-82-6	C00847	HMDB00017	0.9188	0.926		0.9224		1.29711	1.33328		-0.281045
557	gamma-glutamyl-epsilon-lysine	Peptide	Gamma-glutamyl Amino Acid		33934	LC/MS Pos Early	100001262	2725	276.155	7015685	17105-15-6		HMDB03869	0.8404	1.0416		0.941		1.01079	0.248316		-0.281061
335	1-carboxyethylisoleucine	Amino Acid	Leucine, Isoleucine and Valine Metabolism		62558	LC/MS Neg	100020427	2628	202.108					0.7133	0.7262		0.71975		0.93776	0.774783		-0.281382
1393	hexadecadienoate (16:2n6)	Lipid	Long Chain Polyunsaturated Fatty Acid (n3 and n6)		57652	LC/MS Neg	100009394	5398	251.202		28290-73-5		HMDB00477	1.013	0.9116		0.9623		1.24488	0.990167		-0.285386
4170	3-hydroxycotinine glucuronide	Xenobiotics	Tobacco Metabolite		43470	LC/MS Neg	100004494	1745	367.115	183115	132929-88-5		HMDB01204	0.5926	0.5926		0.5926		0.630852	0.13396		-0.285548
	X - 24295				52483	LC/MS Neg		1152	217.071					1.0299	0.8825		0.9562		1.28679	1.15708		-0.285708
4125	methyl-4-hydroxybenzoate sulfate	Xenobiotics	Benzoate Metabolism		48429	LC/MS Neg	100006116	2873	230.997					0.0856	0.0856		0.0856		8.49147	29.2297		-0.28758
1391	docosatrienoate (22:3n3)	Lipid	Long Chain Polyunsaturated Fatty Acid (n3 and n6)		32417	LC/MS Neg	100001195	5823	333.28	5312556	59708-86-0	C16534	HMDB02823	1	0.9585		0.97925		1.18681	0.721241		-0.287779
1704	carnitine	Lipid	Carnitine Metabolism		15500	LC/MS Pos Early	100000007	1978	162.113	10917	461-05-2	C00318	HMDB00062	1.0156	0.9605		0.98805		1.03552	0.163809		-0.289813
4499	glucuronide of piperine metabolite C17H21NO3 (5)*	Xenobiotics	Food Component/Plant		62292	LC/MS Neg	100020493	4039	462.177					0.888	1.3165		1.10225		1.77282	2.30826		-0.290511
51	glutamate, gamma-methyl ester	Amino Acid	Glutamate Metabolism		33487	LC/MS Pos Early	100001103	2170	162.076	68662	1499-55-4;1499-55-4		HMDB61715	0.8695	1.0338		0.95165		1.03235	0.277437		-0.29087
1073	glucose	Carbohydrate	Glycolysis, Gluconeogenesis, and Pyruvate Metabolism		48152	LC/MS Polar	572	2342	225.062	5793	50-99-7	C00031	HMDB00122	1.0713	1.0572		1.06425		1.23919	0.59583		-0.293604
2882	7-dehydrocholesterol	Lipid	Sterol		1099	LC/MS Pos Late	264	2467	367.336	439423	434-16-2	C01164	HMDB00032	1	0.3534		0.6767		0.93856	0.885644		-0.295672
3872	N4-acetylcytidine	Nucleotide	Pyrimidine Metabolism, Cytidine containing		35130	LC/MS Pos Early	100001413	1580	286.103	107461	3768-18-1		HMDB05923	0.9145	1.0168		0.96565		1.15998	0.655323		-0.296541
551	gamma-glutamylglutamine	Peptide	Gamma-glutamyl Amino Acid		2730	LC/MS Pos Early	1140	1430	276.119	150914	10148-81-9	C05283	HMDB11738	0.9949	0.9144		0.95465		1.01042	0.187312		-0.29776
4184	2-piperidinone	Xenobiotics	Food Component/Plant		43400	LC/MS Pos Early	100004295	1675	100.076	12665	675-20-7		HMDB11749	1.0062	1.0056		1.0059		1.2569	0.826439		-0.303713
	X - 25790				63560	LC/MS Pos Early		1654	247.092					0.9557	0.8117		0.8837		1.12268	0.778642		-0.306924
5379	3-hydroxy-2-methylpyridine sulfate	Xenobiotics	Chemical		63227	LC/MS Neg	100020975	1849	188.002					0.3695	0.3695		0.3695		1.03834	2.17754		-0.307154
856	prolylglycine	Peptide	Dipeptide		40703	LC/MS Pos Early	100003674	2136	173.092	6426709	2578-57-6		HMDB11178	0.6735	0.7011		0.6873		0.98892	0.981238		-0.307387
	X - 12851				46639	LC/MS Neg		4844	311.666					0.2591	0.2591		0.2591		2.12768	6.03941		-0.309398
	X - 16576				46673	LC/MS Neg		4496	167.108					0.8241	0.9952		0.90965		0.980072	0.227491		-0.309559
1985	trimethylamine N-oxide	Lipid	Phospholipid Metabolism		40406	LC/MS Pos Early	100003397	2100	76.0757	1145	1184-78-7	C01104	HMDB00925	0.626	0.6232		0.6246		1.84852	3.9469		-0.310096
5382	(2-butoxyethoxy)acetic acid	Xenobiotics	Chemical		63380	LC/MS Pos Early	100021457	3177	177.112	106312				0.9081	1.1035		1.0058		1.27952	0.875329		-0.312705
	X - 17185				46490	LC/MS Neg		3079.5	215.002					0.8907	0.8897		0.8902		1.77188	2.77411		-0.317825
	X - 17690				46710	LC/MS Neg		2904	245.049					0.4667	0.4083		0.4375		5.69676	16.5292		-0.31818
1341	myristate (14:0)	Lipid	Long Chain Saturated Fatty Acid		1365	LC/MS Neg	519	5440	227.202	11005	544-63-8	C06424	HMDB00806	0.9865	0.9357		0.9611		1.17647	0.65993		-0.326356
1749	3-hydroxysebacate	Lipid	Fatty Acid, Monohydroxy		31943	LC/MS Polar	100001145	2411	217.108	3017884	73141-46-5		HMDB00350	0.9701	0.998		0.98405		2.37504	4.24182		-0.327924
4276	2,3-dihydroxyisovalerate	Xenobiotics	Food Component/Plant		38276	LC/MS Polar	100002417	1050	133.051	677	1756-18-9	C04039	HMDB12141	0.9082	0.759		0.8336		2.01953	3.57389		-0.331831
1697	3-hydroxyhexanoylcarnitine (1)	Lipid	Fatty Acid Metabolism (Acyl Carnitine, Hydroxy)		62557	LC/MS Pos Early	100020825	2918	276.181					0.9497	0.9528		0.95125		1.21567	0.789644		-0.334862
98	lysine	Amino Acid	Lysine Metabolism		1301	LC/MS Pos Early	407	2850	147.113	5962	56-87-1	C00047	HMDB00182	0.9586	1.02		0.9893		1.03944	0.149651		-0.33502
3031	androstenediol (3beta,17beta) disulfate (1)	Lipid	Androgenic Steroids		37202	LC/MS Neg	100001992	3740	224.062	87120982		C04295	HMDB03818	1.1176	0.9326		1.0251		1.34525	0.954525		-0.335405
	X - 25271				62500	LC/MS Pos Early		1777	156.077					0.9992	0.7884		0.8938		1.9456	3.13137		-0.33589
3893	5,6-dihydrothymine	Nucleotide	Pyrimidine Metabolism, Thymine containing		1418	LC/MS Neg	158	1637.8	127.051	93556	696-04-8	C00906	HMDB00079	0.9538	1.0242		0.989		1.09082	0.300247		-0.339108
43	glutamine	Amino Acid	Glutamate Metabolism		53	LC/MS Pos Early	563	1291	147.076	5961	56-85-9	C00064	HMDB00641	0.9645	0.9458		0.95515		1.00464	0.145388		-0.340372
4167	hydroxycotinine	Xenobiotics	Tobacco Metabolite		38661	LC/MS Pos Early	100002717	2030	193.097	10219774	34834-67-8		HMDB01390	0.0315	0.0315		0.0315		0.24896	0.636436		-0.341684
5144	2,6-dihydroxybenzoic acid	Xenobiotics	Drug - Topical Agents		63042	LC/MS Neg	100020837	2575	153.019	9338	303-07-1		HMDB13676	0.8802	0.8529		0.86655		1.11798	0.735391		-0.341894
	X - 13658				47664	LC/MS Neg		4643	253.083					0.0795	0.0795		0.0795		8.44632	24.4111		-0.342746
502	2-hydroxybutyrate/2-hydroxyisobutyrate	Amino Acid	Glutathione Metabolism		52281	LC/MS Polar	100008928	1258	103.04					1.0211	0.9794		1.00025		1.33998	0.990399		-0.343027
78	imidazole lactate	Amino Acid	Histidine Metabolism		15716	LC/MS Pos Early	100000263	2040	157.061	793	14403-45-3	C05568	HMDB02320	0.8782	0.842		0.8601		0.979972	0.348866		-0.343605
3945	pantothenate (Vitamin B5)	Cofactors and Vitamins	Pantothenate and CoA Metabolism		1508	LC/MS Neg	1024	1498.7	218.103	6613	137-08-6	C00864	HMDB00210	0.7936	1.0634		0.9285		1.16786	0.695982		-0.343911
4168	cotinine N-oxide	Xenobiotics	Tobacco Metabolite		38662	LC/MS Pos Early	100002719	1377	193.097	9815514	36508-80-2		HMDB01411	0.1732	0.1732		0.1732		0.297692	0.361002		-0.344851
2549	glycerophosphoglycerol	Lipid	Glycerolipid Metabolism		48857	LC/MS Polar	100001619	2430	245.043	439964		C03274		0.6684	1		0.8342		1.08435	0.725089		-0.344989
1946	chiro-inositol	Lipid	Inositol Metabolism		37112	LC/MS Polar	100001859	3191.2	225.062		643-12-9	C19891	HMDB34220	0.2076	0.2076		0.2076		0.846008	1.84662		-0.345718
	X - 07765				46590	LC/MS Neg		3698	245.048					0.4801	0.4227		0.4514		1.63015	3.39045		-0.347668
2964	5alpha-pregnan-3beta,20alpha-diol disulfate	Lipid	Progestin Steroids		37198	LC/MS Neg	100001988	3962	239.085					1.155	1.0039		1.07945		3.22962	6.17186		-0.348382
1313	malonate	Lipid	Fatty Acid Synthesis		15872	LC/MS Polar	818	3447	103.004	867	141-82-2;26522-22-85-0	C00383	HMDB00691	0.9454	1.0818		1.0136		1.11665	0.295784		-0.348403
1696	(S)-3-hydroxybutyrylcarnitine	Lipid	Fatty Acid Metabolism (Acyl Carnitine, Hydroxy)		52984	LC/MS Pos Early	100009271	2340	248.149				HMDB13127	0.8416	0.9987		0.92015		1.28559	1.04711		-0.348997
4779	3-(methylthio)acetaminophen sulfate*	Xenobiotics	Drug - Analgesics, Anesthetics		62567	LC/MS Neg	100020827	2265	276.001					0.152	0.1562		0.1541		0.262212	0.308525		-0.350416
	X - 23680				49557	LC/MS Pos Late		1049	338.232					1.1779	0.858		1.01795		1.22695	0.592917		-0.352498
487	guanidinosuccinate	Amino Acid	Guanidino and Acetamido Metabolism		32446	LC/MS Polar	100001212	3550	174.052	97856	6133-30-8	C03139	HMDB03157	0.8391	0.8817		0.8604		1.0385	0.504859		-0.352772
5142	salicylate	Xenobiotics	Drug - Topical Agents		1515	LC/MS Polar	501	802	137.024	338	69-72-7	C00805	HMDB01895	0.8623	0.8358		0.84905		1.78121	2.62264		-0.355427
5013	metformin	Xenobiotics	Drug - Metabolic		38306	LC/MS Pos Early	100002405	2817	130.109	4091	1115-70-4	C07151	HMDB01921	0.5466	0.5466		0.5466		0.608292	0.173358		-0.355865
	X - 24473				52790	LC/MS Pos Early		1709	146.081					0.6629	0.621		0.64195		0.946244	0.854941		-0.355924
1747	3-hydroxydecanoate	Lipid	Fatty Acid, Monohydroxy		22053	LC/MS Neg	100000997	4634.7	187.134	26612	5561-87-5		HMDB02203	0.9492	0.8994		0.9243		1.44228	1.44421		-0.358659
1754	3-hydroxyoleate*	Lipid	Fatty Acid, Monohydroxy		61843	LC/MS Neg	100019966	5508	297.243					1.1112	0.6863		0.89875		1.18414	0.795135		-0.358915
2865	3-hydroxy-3-methylglutarate	Lipid	Mevalonate Metabolism		531	LC/MS Polar	112	2850	161.046	1662	503-49-1	C03761	HMDB00355	0.8152	1.0418		0.9285		1.04685	0.328505		-0.360263
3868	cytidine	Nucleotide	Pyrimidine Metabolism, Cytidine containing		514	LC/MS Pos Early	827	2124	244.093	6175	65-46-3	C00475	HMDB00089	0.9671	0.7364		0.85175		1.06787	0.59601		-0.362615
4040	retinal	Cofactors and Vitamins	Vitamin A Metabolism		40807	LC/MS Pos Late	100004088	1666	285.221	638015		C00376	HMDB01358	0.9903	0.9842		0.98725		1.12063	0.367654		-0.362781
2958	5alpha-pregnan-3beta,20alpha-diol monosulfate (2)	Lipid	Progestin Steroids		37200	LC/MS Neg	100002014	5060	399.221					0.8243	0.9001		0.8622		3.77462	8.01935		-0.363174
4323	N-acetylalliin	Xenobiotics	Food Component/Plant		45404	LC/MS Pos Early	100005367	1348	220.064					1.2363	0.9037		1.07		1.88529	2.24385		-0.363345
1795	9,10-DiHOME	Lipid	Fatty Acid, Dihydroxy		38399	LC/MS Neg	179	5180	313.238	9966640	263399-34-4	C14828	HMDB04704	1	0.7403		0.87015		1.1673	0.815244		-0.364487
3118	glycodeoxycholate	Lipid	Secondary Bile Acid Metabolism		18477	LC/MS Neg	100000436	5281	448.307	3035026	360-65-6	C05464	HMDB00631	0.832	0.9851		0.90855		1.37125	1.26183		-0.366689
2965	5alpha-pregnan-diol disulfate	Lipid	Progestin Steroids		46172	LC/MS Neg	100002015	4310	239.085	5127902				0.2585	0.2106		0.23455		2.98026	7.46821		-0.367654
316	3-methylglutaconate	Amino Acid	Leucine, Isoleucine and Valine Metabolism		57747	LC/MS Polar	100002458	2700	99.0452	1551553	5746-90-7		HMDB00522	0.9955	1.0045		1		1.1935	0.525816		-0.367992
2943	pregnenediol sulfate (C21H34O5S)*	Lipid	Pregnenolone Steroids		32619	LC/MS Neg	100002067	5000	397.205		1247-64-9			0.9334	0.9325		0.93295		1.23364	0.816199		-0.368408
3127	lithocholic acid sulfate (2)	Lipid	Secondary Bile Acid Metabolism		62527	LC/MS Neg	100020824	5028	227.12					0.4515	0.4515		0.4515		1.60199	3.10625		-0.370379
1500	suberate (C8-DC)	Lipid	Fatty Acid, Dicarboxylate		15730	LC/MS Polar	100000016	2577.6	173.082	10457	505-48-6	C08278	HMDB00893	0.899	0.7068		0.8029		1.09594	0.78595		-0.372843
1361	oleate/vaccenate (18:1)	Lipid	Long Chain Monounsaturated Fatty Acid		52285	LC/MS Neg	100008930	5655	281.249					1.0588	0.9797		1.01925		1.33917	0.848236		-0.377157
	X - 11483				47650	LC/MS Neg		4449	505.208					0.3759	0.3759		0.3759		0.46824	0.244478		-0.377703
3115	deoxycholic acid (12 or 24)-sulfate*	Lipid	Secondary Bile Acid Metabolism		63688	LC/MS Neg	100021712	4580	235.118					0.9321	0.9147		0.9234		1.54774	1.65143		-0.378058
3162	glycocholenate sulfate*	Lipid	Secondary Bile Acid Metabolism		32599	LC/MS Neg	100001989	4750	254.623					0.9513	0.9868		0.96905		1.13706	0.443727		-0.378634
4166	cotinine	Xenobiotics	Tobacco Metabolite		553	LC/MS Pos Early	848	2213	177.102	854019	486-56-6		HMDB01046	0.0725	0.0725		0.0725		0.330512	0.674635		-0.382447
4274	1,6-anhydroglucose	Xenobiotics	Food Component/Plant		21049	LC/MS Polar	100000939	1175.5	207.051	2724705	498-07-7		HMDB00640	0.5759	0.5759		0.5759		1.05476	1.25043		-0.382954
	X - 12112				47690	LC/MS Pos Early		950	142.086					1.072	0.9101		0.99105		1.46069	1.22505		-0.383363
107	N6-methyllysine	Amino Acid	Lysine Metabolism		62860	LC/MS Pos Early	100003415	2831	161.129	164795	1188-07-4	C02728	HMDB02038	0.9082	0.9089		0.90855		1.44856	1.40117		-0.385402
1119	arabinose	Carbohydrate	Pentose Metabolism		575	LC/MS Polar	828	1804.5	195.051	66308	28697-53-2	C00216	HMDB00646	1.0078	0.1539		0.58085		0.79396	0.55268		-0.385594
4146	3-(3-hydroxyphenyl)propionate	Xenobiotics	Benzoate Metabolism		35635	LC/MS Neg	100001624	1980	165.056	91	621-54-5	C11457	HMDB00375	0.9217	0.8617		0.8917		1.63649	1.92378		-0.387148
2955	5alpha-pregnan-3beta,20beta-diol monosulfate (1)	Lipid	Progestin Steroids		37196	LC/MS Neg	100002009	5180	399.221					0.3979	0.4783		0.4381		4.02764	9.23059		-0.388875
3168	taurochenodeoxycholic acid 3-sulfate	Lipid	Secondary Bile Acid Metabolism		62890	LC/MS Neg	100021093	4809	288.62				HMDB02486	0.7637	0.8419		0.8028		1.58463	2.00351		-0.390231
1289	alpha-ketoglutarate	Energy	TCA Cycle		528	LC/MS Polar	93	2700	145.014	51	305-72-6;328-50-7;22202-68-2	C00026	HMDB00208	0.8917	0.9966		0.94415		1.02391	0.203843		-0.391292
4093	4-ethylcatechol sulfate	Xenobiotics	Benzoate Metabolism		63072	LC/MS Neg	100020536	3379	217.018					0.3969	0.3969		0.3969		1.0122	1.57165		-0.391502
1694	octadecenedioylcarnitine (C18:1-DC)*	Lipid	Fatty Acid Metabolism (Acyl Carnitine, Dicarboxylate)		61865	LC/MS Pos Late	100005996	1180	456.332		251981-06-3			0.9749	0.9978		0.98635		1.19653	0.536278		-0.391927
111	5-hydroxylysine	Amino Acid	Lysine Metabolism		15685	LC/MS Pos Early	100000054	2790	163.108	1029	13204-98-3	C16741	HMDB00450	0.992	0.9693		0.98065		1.15979	0.454096		-0.394494
	X - 12104				46932	LC/MS Pos Early		1300	271.092					0.9703	0.894		0.93215		1.08422	0.383003		-0.397036
	X - 21442				46487	LC/MS Neg		3823	333.208					0.4512	0.4512		0.4512		0.531032	0.200042		-0.399076
4462	methyl indole-3-acetate	Xenobiotics	Food Component/Plant		1584	LC/MS Pos Early	1104	3380	190.086	74706	1912-33-0		HMDB29738	0.9514	0.9093		0.93035		1.69971	1.92118		-0.40046
	X - 13866				46417	LC/MS Neg		2417.8	253.108					0.5103	0.4472		0.47875		1.84241	3.3766		-0.403855
206	dopamine 3-O-sulfate	Amino Acid	Tyrosine Metabolism		48407	LC/MS Neg	100006361	1556.2	232.029	122136		C13690	HMDB06275	0.8869	0.8143		0.8506		1.88728	2.54951		-0.406621
3968	alpha-tocopherol	Cofactors and Vitamins	Tocopherol Metabolism		1561	LC/MS Pos Late	1105	2522	430.378	14985	59-02-9;10191-41-0	C02477	HMDB01893	0.9763	0.9816		0.97895		1.0686	0.219598		-0.408227
1343	palmitate (16:0)	Lipid	Long Chain Saturated Fatty Acid		1336	LC/MS Neg	424	5618	255.233	985	57-10-3	C00249	HMDB00220	1.0348	0.9652		1		1.20716	0.507343		-0.408323
1389	docosapentaenoate (DPA; 22:5n3)	Lipid	Long Chain Polyunsaturated Fatty Acid (n3 and n6)		32504	LC/MS Neg	100001181	5571	329.249	6441454	2234-74-4	C16513	HMDB06528	0.9978	0.885		0.9414		1.23505	0.716994		-0.409554
	X - 12013				46611	LC/MS Neg		2066	242.013					0.3483	0.8152		0.58175		2.46026	4.58297		-0.40989
3025	etiocholanolone glucuronide	Lipid	Androgenic Steroids		47112	LC/MS Neg	100005403	4915	465.249	270605	3602-09-03		HMDB04484	0.795	0.6318		0.7134		1.0437	0.7981		-0.413863
440	N-methylhydroxyproline	Amino Acid	Urea cycle; Arginine and Proline Metabolism		62068	LC/MS Pos Early	100020215	1145	146.081					0.46	0.7452		0.6026		1.05604	1.08767		-0.416889
	X - 12117				47695	LC/MS Pos Early		2366	204.134					0.9401	0.8103		0.8752		1.09275	0.518906		-0.419251
4781	2-acetamidophenol sulfate	Xenobiotics	Drug - Analgesics, Anesthetics		48580	LC/MS Neg	100006190	2251	230.013	181671	40712-60-5			0.3238	0.5756		0.4497		0.897328	1.06384		-0.420768
1293	fumarate	Energy	TCA Cycle		1643	LC/MS Polar	330	3084	115.004	444972	100-17-8	C00122	HMDB00134	0.9613	0.9323		0.9468		1.12904	0.432307		-0.421543
1367	10-nonadecenoate (19:1n9)	Lipid	Long Chain Monounsaturated Fatty Acid		33972	LC/MS Neg	100001277	5780	295.264	5312513	73033-09-7		HMDB13622	0.9688	0.9832		0.976		1.34156	0.8603		-0.424926
	X - 23644				49521	LC/MS Pos Early		983	146.081					0.4968	0.4261		0.46145		2.20053	4.07785		-0.42647
1511	3-hydroxydodecanedioate*	Lipid	Fatty Acid, Dicarboxylate		62915	LC/MS Neg	100001454	2252	245.139	16663321	34574-69-1		HMDB00413	0.5118	0.5118		0.5118		1.25929	1.75192		-0.426669
1620	N-palmitoylglycine	Lipid	Fatty Acid Metabolism (Acyl Glycine)		42092	LC/MS Neg	100003686	5580	312.254	151008	2441-41-0		HMDB13034	0.8713	0.8344		0.85285		1.00733	0.361197		-0.427695
	X - 21467				46512	LC/MS Neg		4041	262.62					1.0938	0.9194		1.0066		1.27424	0.624431		-0.42862
1193	fructose	Carbohydrate	Fructose, Mannose and Galactose Metabolism		48195	LC/MS Polar	878	2065	225.062	5984	57-48-7	C00095	HMDB00660	1.0282	0.9383		0.98325		1.34963	0.853321		-0.42936
2967	pregnanediol-3-glucuronide	Lipid	Progestin Steroids		40708	LC/MS Neg	100003470	5145	495.296	123796	1852-49-9		HMDB10318	0.3614	0.3732		0.3673		2.41256	4.73589		-0.431863
	X - 12544				46510	LC/MS Neg		3166.9	209.082					0.2118	0.2118		0.2118		6.08548	13.5795		-0.432539
	X - 11850				46507	LC/MS Neg		3176	226.018					0.1095	0.1095		0.1095		3.57433	7.97228		-0.43461
	X - 11843				46466	LC/MS Neg		2674.6	230.013					0.2015	0.2015		0.2015		1.97902	4.07773		-0.435909
	X - 21470				46515	LC/MS Neg		3249	232.06					0.9204	0.7704		0.8454		1.14871	0.691669		-0.438522
4507	sulfate of piperine metabolite C16H19NO3 (3)*	Xenobiotics	Food Component/Plant		62296	LC/MS Neg	100020497	4200	352.086					0.551	0.5116		0.5313		0.868824	0.761728		-0.443103
3010	dehydroepiandrosterone sulfate (DHEA-S)	Lipid	Androgenic Steroids		32425	LC/MS Neg	100000792	4745	367.159	12594	651-48-9	C04555	HMDB01032	0.7471	0.7088		0.72795		0.971632	0.549441		-0.443509
267	indoleacetate	Amino Acid	Tryptophan Metabolism		27513	LC/MS Neg	100001034	2200	174.056	802	6505-45-9	C00954	HMDB00197	0.8684	0.8461		0.85725		1.59482	1.66015		-0.444276
2544	glycerol 3-phosphate	Lipid	Glycerolipid Metabolism		43847	LC/MS Pos Early	100000258	580	173.021	754	29849-82-9	C00093	HMDB00126	0.8811	0.9598		0.92045		1.02426	0.232431		-0.44661
561	gamma-glutamyltryptophan	Peptide	Gamma-glutamyl Amino Acid		33947	LC/MS Neg	100001295	1960	332.125	3989307	66471-20-3		HMDB29160	0.9797	0.9522		0.96595		1.04126	0.168565		-0.446771
4606	eugenol sulfate	Xenobiotics	Food Component/Plant		48715	LC/MS Neg	100006171	3782	243.033	180632	95480-60-7			0.4754	0.2042		0.3398		1.63497	2.89827		-0.446876
230	N-acetyltryptophan	Amino Acid	Tryptophan Metabolism		33959	LC/MS Pos Early	100001254	2640	247.108	700653	1218-34-4	C03137	HMDB13713	0.9156	0.8683		0.89195		1.12737	0.526757		-0.446927
146	2-hydroxyphenylacetate	Amino Acid	Phenylalanine Metabolism		1432	LC/MS Polar	235	858.6	151.04	11970	614-75-5	C05852	HMDB00669	0.9572	0.841		0.8991		1.14702	0.554575		-0.447038
3036	androstenediol (3alpha, 17alpha) monosulfate (3)	Lipid	Androgenic Steroids		37209	LC/MS Neg	100002027	5180	369.174					0.9134	0.8914		0.9024		1.37215	1.04844		-0.44805
1329	heptanoate (7:0)	Lipid	Medium Chain Fatty Acid		1644	LC/MS Neg	925	3670	129.092	8094	111-14-8	C17714	HMDB00666	0.8992	0.996		0.9476		1.35039	0.896423		-0.449333
2908	campesterol	Lipid	Sterol		33997	LC/MS Pos Late	100001269	2873	383.367	173183	474-62-4	C01789	HMDB02869	0.7849	0.8658		0.82535		1.07332	0.547392		-0.452995
	X - 11261				32578	LC/MS Pos Late		870	286.201					0.8656	0.8464		0.856		1.30728	0.995753		-0.453209
	X - 11372				46594	LC/MS Neg		5319	467.373					0.9315	0.8858		0.90865		1.10887	0.441		-0.454009
1304	citraconate/glutaconate	Energy	TCA Cycle		47076	LC/MS Polar	100006438	2600	129.019					0.8484	0.6292		0.7388		1.25072	1.12728		-0.454121
	X - 23782				49681	LC/MS Pos Late		1627	349.273					0.9949	0.8118		0.90335		1.24552	0.747546		-0.457729
1404	docosadienoate (22:2n6)	Lipid	Long Chain Polyunsaturated Fatty Acid (n3 and n6)		32415	LC/MS Neg	100001182	6034	335.296	5282807	7370-49-2	C16533	HMDB61714	0.8702	0.8666		0.8684		1.11881	0.546965		-0.457814
4435	homostachydrine*	Xenobiotics	Food Component/Plant		33009	LC/MS Pos Early	100001550	1750	158.118	441447	1195-94-4	C08283	HMDB33433	0.4329	0.4329		0.4329		1.0036	1.24209		-0.459463
1344	margarate (17:0)	Lipid	Long Chain Saturated Fatty Acid		1121	LC/MS Neg	891	5731	269.249	10465	506-12-7		HMDB02259	0.9615	0.8958		0.92865		1.15238	0.486926		-0.459474
	X - 16580				47804	LC/MS Pos Early		2537	222.079					0.9469	0.9192		0.93305		1.25499	0.699594		-0.460184
5350	3-hydroxypyridine sulfate	Xenobiotics	Chemical		48448	LC/MS Neg	100006098	1595.5	173.987		1955-23-3			0.0759	0.1304		0.10315		1.71817	3.49395		-0.462232
	X - 23780				49679	LC/MS Pos Early		2190	144.102					0.6893	0.6673		0.6783		3.92616	6.97575		-0.465593
3941	riboflavin (Vitamin B2)	Cofactors and Vitamins	Riboflavin Metabolism		1827	LC/MS Neg	500	3160	255.089	493570	83-88-5	C00255	HMDB00244	0.6997	0.6997		0.6997		1.75323	2.25466		-0.467268
336	3-methyl-2-oxovalerate	Amino Acid	Leucine, Isoleucine and Valine Metabolism	5 carbon chain, potential HAO1 product, would be derived from 2-Hydroxy-3-Methylpentanoic Acid	15676	LC/MS Neg	100000036	2064.2	129.056	47	1460-34-0;51829-07-3	C00671	HMDB03736	0.978	0.9025		0.94025		1.1216	0.381886		-0.474879
374	S-methylmethionine	Amino Acid	Methionine, Cysteine, SAM and Taurine Metabolism		38127	LC/MS Pos Early	100002183	2555	164.074	458	3493-12-07	C05319	HMDB38670	0.2641	0.2881		0.2761		0.90252	1.30766		-0.479039
1503	azelate (nonanedioate; C9)	Lipid	Fatty Acid, Dicarboxylate		18362	LC/MS Polar	2029	2520	187.098	2266	123-99-9	C08261	HMDB00784	0.6925	1.0093		0.8509		1.25873	0.851099		-0.479178
	X - 12849				46636	LC/MS Neg		4696	331.176					1	0.9308		0.9654		1.95179	2.05165		-0.480778
4498	glucuronide of piperine metabolite C17H21NO3 (4)*	Xenobiotics	Food Component/Plant		62291	LC/MS Neg	100020492	3992	462.177					0.9627	0.6723		0.8175		2.00292	2.43176		-0.487473
	X - 15728				46666	LC/MS Neg		3976	231.033					0.1606	0.1606		0.1606		1.73955	3.23779		-0.487662
394	S-methylcysteine sulfoxide	Amino Acid	Methionine, Cysteine, SAM and Taurine Metabolism		43378	LC/MS Pos Early	100002927	900	152.038	82142	6853-87-8		HMDB29432	0.8907	0.8303		0.8605		1.17023	0.63494		-0.487807
393	S-methylcysteine	Amino Acid	Methionine, Cysteine, SAM and Taurine Metabolism		39592	LC/MS Neg	100002749	880	134.028	24417	1187-84-4		HMDB02108	0.9135	0.8145		0.864		1.09236	0.467621		-0.488344
486	4-guanidinobutanoate	Amino Acid	Guanidino and Acetamido Metabolism		15681	LC/MS Pos Early	100000096	2320	146.092	500	463-003;463-00-3	C01035	HMDB03464	0.7326	0.8052		0.7689		1.13458	0.748129		-0.488798
414	arginine	Amino Acid	Urea cycle; Arginine and Proline Metabolism		1638	LC/MS Pos Early	231	2825	175.119	232	1119-34-2	C00062	HMDB00517	0.9015	0.9252		0.91335		1.03269	0.243162		-0.490776
	X - 13507				47439	LC/MS Pos Early		2520	158.093					0.229	0.229		0.229		0.751068	1.06295		-0.491152
	X - 12407				46615	LC/MS Neg		1873	204.981					0.3606	0.3606		0.3606		0.79346	0.876397		-0.493908
3106	glycochenodeoxycholate glucuronide (1)	Lipid	Primary Bile Acid Metabolism		52983	LC/MS Neg	100009264	4806	311.666					0.9145	0.7946		0.85455		1.42492	1.15285		-0.494751
4014	bilirubin (E,E)*	Cofactors and Vitamins	Hemoglobin and Porphyrin Metabolism		32586	LC/MS Pos Late	100001950	1045	585.271	5315454				0.8055	0.8524		0.82895		1.09737	0.539831		-0.497233
1333	cis-4-decenoate (10:1n6)*	Lipid	Medium Chain Fatty Acid		62873	LC/MS Neg	100002796	4890	169.123	5312351	505-90-8			0.7848	0.9267		0.85575		1.13021	0.550207		-0.498826
	X - 23636				49512	LC/MS Pos Early		1129	249.108					0.9888	0.8939		0.94135		1.0581	0.232583		-0.501989
278	indoleacetoylcarnitine*	Amino Acid	Tryptophan Metabolism		62279	LC/MS Pos Early	100020479	3114	319.165					1.088	0.912		1		1.70095	1.39537		-0.502341
	X - 21471				46516	LC/MS Neg		4039	295.112					0.9397	0.9479		0.9438		1.43232	0.967741		-0.5048
294	1-carboxyethylleucine	Amino Acid	Leucine, Isoleucine and Valine Metabolism		62559	LC/MS Neg	100020425	2663	202.108					0.6903	0.5311		0.6107		0.912916	0.595075		-0.507862
3119	taurodeoxycholate	Lipid	Secondary Bile Acid Metabolism		12261	LC/MS Neg	1668	5257.4	498.289	2733768	207737-97-1	C05463	HMDB00896	0.4512	0.5917		0.52145		1.41556	1.74308		-0.512952
4512	sulfate of piperine metabolite C18H21NO3 (1)*	Xenobiotics	Food Component/Plant		62297	LC/MS Neg	100020502	4481	378.102					0.525	0.5272		0.5261		0.965108	0.854453		-0.513788
86	1-methyl-4-imidazoleacetate	Amino Acid	Histidine Metabolism		32350	LC/MS Pos Early	100001208	2064	141.066	75810	2625-49-2	C05828	HMDB02820	0.9254	0.9205		0.92295		1.13395	0.410577		-0.513906
3032	androstenediol (3beta,17beta) disulfate (2)	Lipid	Androgenic Steroids		37203	LC/MS Neg	100001994	4065	224.062	87120982		C04295	HMDB03818	0.9466	0.8838		0.9152		1.18591	0.523028		-0.517586
1700	3-hydroxydecanoylcarnitine	Lipid	Fatty Acid Metabolism (Acyl Carnitine, Hydroxy)		63358	LC/MS Pos Late	100021141	961	332.243				HMDB61636	0.8637	0.8055		0.8346		1.11152	0.534226		-0.51835
	X - 11880				46608	LC/MS Neg		5341	537.416					0.8573	0.92		0.88865		1.12222	0.449762		-0.519311
108	N6,N6-dimethyllysine	Amino Acid	Lysine Metabolism		62862	LC/MS Pos Early	100020417	2831	175.144	193344	2259-86-1	C05545	HMDB13287	0.901	0.9201		0.91055		1.18881	0.528719		-0.526287
4601	pyrraline	Xenobiotics	Food Component/Plant		48428	LC/MS Neg	100001767	2304	253.119	122228	74509-14-1		HMDB33143	0.8719	0.9498		0.91085		1.74658	1.5846		-0.527405
1493	3-methyladipate	Lipid	Fatty Acid, Dicarboxylate		36749	LC/MS Polar	100001765	2865	159.066	12292	3058-01-03		HMDB00555	0.784	0.6702		0.7271		0.956868	0.435376		-0.527746
347	ethylmalonate	Amino Acid	Leucine, Isoleucine and Valine Metabolism		15765	LC/MS Polar	2054	2785	131.035	11756	601-75-2		HMDB00622	0.7263	0.8015		0.7639		1.31321	1.03486		-0.530802
1462	(14 or 15)-methylpalmitate (a17:0 or i17:0)	Lipid	Fatty Acid, Branched		38768	LC/MS Neg	100002945	5695	269.249	17903417				0.9884	0.8746		0.9315		1.29685	0.684295		-0.533904
4322	alliin	Xenobiotics	Food Component/Plant		41494	LC/MS Pos Early	100003473	1470	178.053	87310	556-27-4	C08265	HMDB33592	0.5455	0.5284		0.53695		1.96588	2.67114		-0.534951
4089	4-methylguaiacol sulfate	Xenobiotics	Benzoate Metabolism		48418	LC/MS Neg	100006105	2978	217.018		756760-43-7			0.4175	0.4545		0.436		1.78861	2.5251		-0.535666
4494	piperine	Xenobiotics	Food Component/Plant		33935	LC/MS Pos Late	100001267	1168	286.144	638024	94-62-2	C03882	HMDB29377	0.8663	0.8341		0.8502		2.06093	2.25972		-0.535787
4095	4-allylcatechol sulfate	Xenobiotics	Benzoate Metabolism		63597	LC/MS Neg	100020578	3571	229.018					0.0822	0.0822		0.0822		2.28332	4.09006		-0.538164
	X - 17325				46672	LC/MS Neg		2868	184.098					0.5928	0.3428		0.4678		1.40289	1.73554		-0.538789
5245	2-aminophenol sulfate	Xenobiotics	Chemical		43266	LC/MS Neg	100004322	1677	188.002	181670			HMDB61116	0.867	0.8615		0.86425		2.15507	2.39235		-0.539561
306	isovalerylcarnitine (C5)	Amino Acid	Leucine, Isoleucine and Valine Metabolism		34407	LC/MS Pos Early	100001393	3085	246.17	6426851	31023-24-2		HMDB00688	0.9012	0.7425		0.82185		1.0689	0.45722		-0.540339
3837	uridine	Nucleotide	Pyrimidine Metabolism, Uracil containing		606	LC/MS Neg	535	1457.6	243.062	6029	58-96-8	C00299	HMDB00296	0.897	0.8536		0.8753		1.01303	0.254062		-0.542103
3053	5alpha-androstan-3beta,17beta-diol disulfate	Lipid	Androgenic Steroids		37190	LC/MS Neg	100001987	3880	225.07	242332	571-20-0	C12525	HMDB00493	0.7476	0.7192		0.7334		1.63044	1.63971		-0.547074
	X - 24546				52867	LC/MS Neg		3289	231.051					0.8488	0.8169		0.83285		1.44906	1.1225		-0.548963
1708	acetoacetate	Lipid	Ketone Bodies		33963	LC/MS Pos Early	1218	1062	103.039	96	3483-11-02	C00164	HMDB00060	0.5944	0.7764		0.6854		1.60691	1.66467		-0.553569
42	glutamate	Amino Acid	Glutamate Metabolism		57	LC/MS Pos Early	561	1500	148.06	611	56-86-0	C00025	HMDB00148	0.9203	0.877		0.89865		1.29745	0.719662		-0.554152
4035	carotene diol (1)	Cofactors and Vitamins	Vitamin A Metabolism		57635	LC/MS Pos Late	100015966	1720	568.428					0.8178	0.7929		0.80535		0.999488	0.349723		-0.55512
4465	N-(2-furoyl)glycine	Xenobiotics	Food Component/Plant		31536	LC/MS Polar	100001086	1230	168.03	21863	5657-19-2;5657-19-2		HMDB00439	0.2026	0.4909		0.34675		1.00739	1.18867		-0.555781
320	3-methylglutarylcarnitine (2)	Amino Acid	Leucine, Isoleucine and Valine Metabolism		46548	LC/MS Pos Early	100005850	2687	290.16	128145			HMDB00552	0.858	0.9341		0.89605		1.2409	0.618891		-0.5572
470	spermidine	Amino Acid	Polyamine Metabolism		485	LC/MS Pos Late	50	700	146.165	1102	124-20-9	C00315	HMDB01257	0.8786	0.9413		0.90995		1.25302	0.613958		-0.558777
1724	eicosapentaenoylcholine	Lipid	Fatty Acid Metabolism (Acyl Choline)		53258	LC/MS Pos Late	100009336	1343	388.321					0.1667	0.4643		0.3155		0.762796	0.798209		-0.560374
500	2-aminobutyrate	Amino Acid	Glutathione Metabolism		42374	LC/MS Pos Early	1128	2059	104.071	439691	1492-24-6	C02261	HMDB00650	0.9116	0.9117		0.91165		1.06816	0.277128		-0.564743
4549	3-hydroxystachydrine*	Xenobiotics	Food Component/Plant		62062	LC/MS Pos Early	100020203	1049	160.097	442640				0.295	0.2742		0.2846		1.61997	2.36372		-0.564945
	X - 11441				46360	LC/MS Neg		3755.8	331.131					1.0201	0.8443		0.9322		1.33241	0.70669		-0.566314
4094	4-methylcatechol sulfate	Xenobiotics	Benzoate Metabolism		46146	LC/MS Neg	100004111	2665	203.002					0.9405	0.8552		0.89785		2.29644	2.46918		-0.566421
4969	4-hydroxycoumarin	Xenobiotics	Drug - Cardiovascular		37445	LC/MS Neg	100002049	2470	161.024	54682930	1076-38-6	C20414		0.4218	0.4218		0.4218		0.839212	0.73465		-0.568178
4015	bilirubin (E,Z or Z,E)*	Cofactors and Vitamins	Hemoglobin and Porphyrin Metabolism		47886	LC/MS Pos Late	100001951	1265	585.271	5799469			HMDB00488	0.9415	0.7646		0.85305		1.09035	0.416712		-0.569463
2	N-acetylglycine	Amino Acid	Glycine, Serine and Threonine Metabolism		27710	LC/MS Pos Early	100001006	826	118.05	10972	543-24-8		HMDB00532	0.869	0.8307		0.84985		1.21076	0.633191		-0.569986
3028	androstenediol (3beta,17beta) monosulfate (1)	Lipid	Androgenic Steroids		37211	LC/MS Neg	100002028	4535	369.174	13847309	521-17-5		HMDB03818	0.7407	0.6912		0.71595		1.16662	0.787109		-0.572569
455	guanidinoacetate	Amino Acid	Creatine Metabolism		43802	LC/MS Polar	344	2884	116.047	763	352-97-6	C00581	HMDB00128	0.8955	0.8391		0.8673		1.04478	0.307466		-0.577235
446	N-methylproline	Amino Acid	Urea cycle; Arginine and Proline Metabolism		37431	LC/MS Pos Early	100001956	1335	130.086	557	475-11-6			0.6099	0.5472		0.57855		1.85543	2.20722		-0.578502
1676	dihomo-linolenoylcarnitine (C20:3n3 or 6)*	Lipid	Fatty Acid Metabolism (Acyl Carnitine, Polyunsaturated)		57521	LC/MS Pos Late	100015840	1392	450.358					0.9211	0.9239		0.9225		1.15413	0.399535		-0.579744
1695	(R)-3-hydroxybutyrylcarnitine	Lipid	Fatty Acid Metabolism (Acyl Carnitine, Hydroxy)		43264	LC/MS Pos Early	100003926	2400	248.149	53481617			HMDB13127	0.2719	0.2719		0.2719		0.827404	0.95681		-0.580579
	X - 18899				47670	LC/MS Neg		3730	337.143					0.8985	0.6029		0.7507		1.18578	0.74912		-0.580788
1732	2-hydroxydecanoate	Lipid	Fatty Acid, Monohydroxy		42489	LC/MS Neg	100004089	4840	187.134	21488	5393-81-7			0.8063	0.824		0.81515		1.05705	0.41647		-0.580829
1498	heptenedioate (C7:1-DC)*	Lipid	Fatty Acid, Dicarboxylate		61866	LC/MS Polar	100019981	2816	157.051					0.6402	0.7435		0.69185		1.18119	0.837066		-0.584587
	X - 18921				47671	LC/MS Neg		4870	193.124					0.8454	0.7967		0.82105		1.17677	0.607265		-0.585771
1402	adrenate (22:4n6)	Lipid	Long Chain Polyunsaturated Fatty Acid (n3 and n6)		32980	LC/MS Neg	100001193	5678	331.264	5497181	2091-25-0	C16527	HMDB02226	0.8546	0.8797		0.86715		1.33384	0.792848		-0.58862
5476	GlcNAc sulfate conjugate of C21H34O2 steroid	Partially Characterized Molecules	Partially Characterized Molecules		63699	LC/MS Neg	100021726	4336.7	299.639					0.4284	0.4743		0.45135		0.820428	0.62622		-0.589374
	X - 24027				52056	LC/MS Pos Late		1518	714.467					0.7847	0.8465		0.8156		1.05983	0.414363		-0.589415
5473	branched-chain, straight-chain, or cyclopropyl 10:1 fatty acid (2)*	Partially Characterized Molecules	Partially Characterized Molecules		63616	LC/MS Neg	100021667	4853	169.123					0.5685	0.9638		0.76615		1.03754	0.46004		-0.589919
550	gamma-glutamylglutamate	Peptide	Gamma-glutamyl Amino Acid		36738	LC/MS Pos Early	331	1775	277.103	92865	1116-22-9	C05282	HMDB11737	0.8348	0.8843		0.85955		1.16113	0.510633		-0.590597
270	indolepropionate	Amino Acid	Tryptophan Metabolism		32405	LC/MS Neg	100001083	2795	188.072	3744	830-96-6		HMDB02302	0.6279	0.5988		0.61335		1.09918	0.819103		-0.593129
1522	octadecanedioate (C18)	Lipid	Fatty Acid, Dicarboxylate		36754	LC/MS Neg	100001615	5043	313.238	70095	871-70-5		HMDB00782	0.896	0.8393		0.86765		1.11309	0.413641		-0.593369
329	isoleucine	Amino Acid	Leucine, Isoleucine and Valine Metabolism		1125	LC/MS Pos Early	376	2800	132.102	6306	73-32-5	C00407	HMDB00172	0.9256	0.9347		0.93015		1.09402	0.275569		-0.594645
	X - 16124				46461	LC/MS Neg		2563.6	203.002					0.0065	0.0065		0.0065		0.640996	1.06378		-0.596455
3103	glyco-beta-muricholate	Lipid	Primary Bile Acid Metabolism		62066	LC/MS Neg	100020214	4762	464.302					0.3897	0.4789		0.4343		1.2336	1.33246		-0.599869
1737	2-hydroxystearate	Lipid	Fatty Acid, Monohydroxy		17945	LC/MS Neg	1239	5695	299.259	69417	629-22-1	C03045		1.1139	0.6893		0.9016		1.08334	0.300326		-0.605143
4396	ergothioneine	Xenobiotics	Food Component/Plant		37459	LC/MS Pos Early	100002154	850	230.096	3032311	58511-63-0	C05570	HMDB03045	0.5888	0.7918		0.6903		1.07162	0.629054		-0.60618
145	phenylacetate	Amino Acid	Phenylalanine Metabolism		57745	LC/MS Neg	100000011	2150	91.0554	999	103-82-2	C07086	HMDB00209	0.5139	0.5139		0.5139		0.98312	0.768892		-0.610255
4108	4-ethylphenyl sulfate	Xenobiotics	Benzoate Metabolism		36099	LC/MS Neg	100001756	3580	201.023	20822574	123-07-9	C13637	HMDB62551	0.4819	0.5152		0.49855		1.58958	1.78729		-0.610441
1037	phenylacetylglutamine	Peptide	Acetylated Peptides		35126	LC/MS Neg	100001417	2330	263.104	92258	28047-15-6	C04148	HMDB06344	0.6441	0.6063		0.6252		1.08252	0.747051		-0.612162
4062	3-hydroxyhippurate sulfate	Xenobiotics	Benzoate Metabolism		62530	LC/MS Polar	100020410	1528	274.003	186339				0.3525	0.3525		0.3525		0.840832	0.794542		-0.614608
201	gentisate	Amino Acid	Tyrosine Metabolism		18280	LC/MS Polar	100000447	905	153.019	3469	490-79-9	C00628	HMDB00152	0.5551	0.5352		0.54515		1.14604	0.973785		-0.61707
1769	13-HODE + 9-HODE	Lipid	Fatty Acid, Monohydroxy		37752	LC/MS Neg	100002196	5275	295.228	43013				0.621	0.7862		0.7036		1.36002	1.06363		-0.617149
365	3-hydroxyisobutyrate	Amino Acid	Leucine, Isoleucine and Valine Metabolism		1549	LC/MS Polar	111	1619	103.04	87	2068-83-9	C06001	HMDB00336	0.8851	0.8545		0.8698		1.32275	0.73253		-0.618334
	X - 25420				62717	LC/MS Pos Early		1712.4	147.022					0.6196	0.5619		0.59075		1.2904	1.13108		-0.618574
296	4-methyl-2-oxopentanoate	Amino Acid	Leucine, Isoleucine and Valine Metabolism		22116	LC/MS Neg	100000551	2170	129.056	70	816-66-0	C00233	HMDB00695	0.9737	0.8574		0.91555		1.13727	0.357581		-0.62005
3120	taurodeoxycholic acid 3-sulfate	Lipid	Secondary Bile Acid Metabolism		62889	LC/MS Neg	100006644	4850	288.62					0.1911	0.243		0.21705		1.3512	1.82636		-0.620987
1653	lignoceroylcarnitine (C24)*	Lipid	Fatty Acid Metabolism (Acyl Carnitine, Long Chain Saturated)		57515	LC/MS Pos Late	100015834	1603	512.467					0.9373	0.7994		0.86835		1.12022	0.404848		-0.622135
1592	butyrylcarnitine (C4)	Lipid	Fatty Acid Metabolism (also BCAA Metabolism)		32412	LC/MS Pos Early	100001054	2860	232.154	439829	25576-40-3	C02862	HMDB02013	0.7106	0.7177		0.71415		1.51598	1.28207		-0.625416
2944	pregnen-diol disulfate*	Lipid	Pregnenolone Steroids		32562	LC/MS Neg	100001993	3868	238.077					0.9	0.7966		0.8483		1.36852	0.831097		-0.625944
3045	5alpha-androstan-3alpha,17beta-diol monosulfate (1)	Lipid	Androgenic Steroids		37186	LC/MS Neg	100002018	4925	371.19					0.7314	0.6478		0.6896		1.71356	1.63242		-0.627266
1400	arachidonate (20:4n6)	Lipid	Long Chain Polyunsaturated Fatty Acid (n3 and n6)		1110	LC/MS Neg	229	5535	303.233	444899	506-32-1	C00219	HMDB01043	0.9798	0.6491		0.81445		1.11174	0.470841		-0.631403
3806	7-methylguanine	Nucleotide	Purine Metabolism, Guanine containing		35114	LC/MS Pos Early	100001456	2175	166.072	11361	578-76-7	C02242	HMDB00897	0.9232	0.9126		0.9179		1.02964	0.176319		-0.633714
1661	cis-4-decenoylcarnitine (C10:1)	Lipid	Fatty Acid Metabolism (Acyl Carnitine, Monounsaturated)		38178	LC/MS Pos Late	100002259	1057	314.233		98930-66-6			0.9398	0.8146		0.8772		1.15091	0.429335		-0.637516
	X - 24849				54877	LC/MS Neg		4611	313.119					0.8854	0.8404		0.8629		1.2019	0.529877		-0.639772
113	fructosyllysine	Amino Acid	Lysine Metabolism		46227	LC/MS Pos Early	100005373	2784	309.166	123708	21291-40-7			0.8154	0.6637		0.73955		1.19722	0.714611		-0.640452
1744	3-hydroxyhexanoate	Lipid	Fatty Acid, Monohydroxy		53230	LC/MS Neg	100006367	1725	131.071	151492	10191-24-9			0.8075	0.8228		0.81515		1.24201	0.665274		-0.641634
4037	carotene diol (3)	Cofactors and Vitamins	Vitamin A Metabolism		57637	LC/MS Pos Late	100015968	1948	568.428					0.9159	0.7018		0.80885		1.03854	0.357427		-0.642609
475	(N(1) + N(8))-acetylspermidine	Amino Acid	Polyamine Metabolism		57814	LC/MS Pos Early	100016038	3080	188.176					0.8318	0.8453		0.83855		1.04557	0.320912		-0.645093
469	N-acetyl-isoputreanine	Amino Acid	Polyamine Metabolism		62309	LC/MS Pos Early	100020487	2305	203.139	131802901				0.833	0.7846		0.8088		1.19029	0.591209		-0.645268
	X - 11442				46443	LC/MS Neg		3890	331.13					1.0097	0.7993		0.9045		1.35418	0.695714		-0.646358
4091	3-methyl catechol sulfate (1)	Xenobiotics	Benzoate Metabolism		46165	LC/MS Neg	100004112	2790	203.002					0.3006	0.3378		0.3192		1.19436	1.35396		-0.646367
4467	N-oxalyl glycine (NOG)	Xenobiotics	Food Component/Plant		57776	LC/MS Polar	100015923	3292	146.01	3080614				1	0.5616		0.7808		1.25653	0.735509		-0.646801
	X - 25957				63908	LC/MS Pos Early		2501.2	168.077					0.6484	0.5887		0.61855		0.990588	0.573894		-0.648269
	X - 11530				46603	LC/MS Neg		4892	313.12					0.9096	0.89		0.8998		1.25292	0.544071		-0.649033
	X - 24813				54841	LC/MS Neg		1286	202.048					0.9484	0.9596		0.954		1.07207	0.181875		-0.649194
1530	hydroxy-CMPF*	Lipid	Fatty Acid, Dicarboxylate		62277	LC/MS Polar	100019794	2153	255.087					0.2694	0.2636		0.2665		5.70186	8.35191		-0.650792
	X - 11308				46390	LC/MS Neg		5163	365.27					0.7992	0.781		0.7901		1.01291	0.341836		-0.651798
1651	arachidoylcarnitine (C20)*	Lipid	Fatty Acid Metabolism (Acyl Carnitine, Long Chain Saturated)		57513	LC/MS Pos Late	100015833	1512	456.405				HMDB06460	0.9399	0.6395		0.7897		1.0573	0.409466		-0.653544
	X - 21448				46493	LC/MS Neg		3098	317.115					0.5021	0.6013		0.5517		0.88462	0.50738		-0.656155
	X - 25617				63237	LC/MS Neg		4158	481.244					0.4132	0.4132		0.4132		0.976716	0.85522		-0.658913
3153	glycohyocholate	Lipid	Secondary Bile Acid Metabolism		42574	LC/MS Neg	100004083	5020	464.302					0.5432	0.4098		0.4765		0.952904	0.722626		-0.659268
	X - 21441				46486	LC/MS Neg		3025.4	294.113					0.8777	0.7855		0.8316		1.35894	0.799315		-0.65974
1666	palmitoleoylcarnitine (C16:1)*	Lipid	Fatty Acid Metabolism (Acyl Carnitine, Monounsaturated)		53223	LC/MS Pos Late	100009406	1357	398.327	71464547				0.9729	0.7882		0.88055		1.23198	0.531775		-0.660862
	X - 17654				46709	LC/MS Neg		5200	365.269					0.6731	0.7233		0.6982		0.932152	0.353694		-0.661453
3052	5alpha-androstan-3beta,17beta-diol monosulfate (2)	Lipid	Androgenic Steroids		37192	LC/MS Neg	100002024	4685	371.19					0.3888	0.4498		0.4193		1.0108	0.891949		-0.663155
1519	hexadecanedioate (C16)	Lipid	Fatty Acid, Dicarboxylate		35678	LC/MS Neg	100001614	4615	285.207	10459	505-54-4	C19615	HMDB00672	0.919	1.0014		0.9602		1.27481	0.47236		-0.666043
	X - 17146				46691	LC/MS Neg		4851	375.181					0.1446	0.1508		0.1477		1.803	2.47625		-0.668471
566	gamma-glutamyl-2-aminobutyrate	Peptide	Gamma-glutamyl Amino Acid		37092	LC/MS Pos Early	100001502	2380	233.113		16869-42-4			0.7284	0.6433		0.68585		1.0709	0.573132		-0.671841
3870	3-methylcytidine	Nucleotide	Pyrimidine Metabolism, Cytidine containing		35132	LC/MS Pos Early	100001466	2176	258.108	159649	21028-20-6			0.5497	0.79		0.66985		1.01571	0.513396		-0.673667
4087	catechol sulfate	Xenobiotics	Benzoate Metabolism		35320	LC/MS Neg	100001605	1906	188.986	3083879	4918-96-1		HMDB59724	0.7246	0.7004		0.7125		1.04602	0.493943		-0.675211
	X - 11381				32698	LC/MS Pos Early		2331	186.112					0.5216	0.8058		0.6637		0.97292	0.454947		-0.679683
450	argininate*	Amino Acid	Urea cycle; Arginine and Proline Metabolism		57461	LC/MS Pos Early	100002769	2150	176.103	160437	157-07-3		HMDB03148	0.7329	0.7555		0.7442		1.05834	0.460385		-0.682351
5226	O-sulfo-L-tyrosine	Xenobiotics	Chemical		45413	LC/MS Neg	100005384	990	260.023	514186				0.8624	0.8134		0.8379		1.026	0.275217		-0.68346
	X - 24947				57714	LC/MS Neg		4518	387.185					0.6652	0.5233		0.59425		1.47356	1.28288		-0.68542
3014	epiandrosterone sulfate	Lipid	Androgenic Steroids		33973	LC/MS Neg	100001287	4855	369.174	9929317	22229-22-7			0.5699	0.5951		0.5825		1.14324	0.816664		-0.686628
	X - 22520				47784	LC/MS Neg		4389	263.628					0.4878	0.5977		0.54275		1.37625	1.21168		-0.687889
	X - 23583				49459	LC/MS Pos Early		1112	116.071					0.1931	0.1931		0.1931		1.2861	1.5862		-0.689064
207	p-cresol glucuronide*	Amino Acid	Tyrosine Metabolism		48841	LC/MS Neg	100006191	2420	283.082	154035	17680-99-8		HMDB11686	0.1057	0.1057		0.1057		1.46588	1.96192		-0.693292
	X - 11522				46914	LC/MS Neg		4760	313.12					0.9022	0.8651		0.88365		1.24086	0.514891		-0.693766
4016	biliverdin	Cofactors and Vitamins	Hemoglobin and Porphyrin Metabolism		2137	LC/MS Pos Late	250	1016	583.255	5353439	55482-27-4;55482-27-4	C00500	HMDB01008	0.9337	0.8415		0.8876		1.29464	0.586174		-0.694401
4061	3-hydroxyhippurate	Xenobiotics	Benzoate Metabolism		39600	LC/MS Neg	100002122	1687	194.046	450268	1637-75-8		HMDB06116	0.4311	0.4607		0.4459		1.37252	1.32817		-0.69767
1674	dihomo-linoleoylcarnitine (C20:2)*	Lipid	Fatty Acid Metabolism (Acyl Carnitine, Polyunsaturated)		57520	LC/MS Pos Late	100015839	1436	452.373					0.8898	0.8548		0.8723		1.1901	0.455168		-0.698195
4530	S-allylcysteine	Xenobiotics	Food Component/Plant		43239	LC/MS Pos Early	100004509	2690	162.058	98280	21593-77-1		HMDB34323	0.2834	0.2841		0.28375		1.55802	1.81994		-0.700173
1345	stearate (18:0)	Lipid	Long Chain Saturated Fatty Acid		1358	LC/MS Neg	439	5872	283.264	5281	57-11-4	C01530	HMDB00827	0.9399	0.827		0.88345		1.0532	0.242129		-0.70109
1376	nervonate (24:1n9)*	Lipid	Long Chain Monounsaturated Fatty Acid		52674	LC/MS Neg	100001231	6804	365.342	5281120	506-37-6	C08323	HMDB02368	0.8908	0.4054		0.6481		1.43264	1.1184		-0.701483
4738	N-methylpipecolate	Xenobiotics	Bacterial/Fungal		47101	LC/MS Pos Early	100005383	1932	144.102	11286529	41447-17-0			0.7583	0.6771		0.7177		1.3605	0.913549		-0.70363
1526	eicosanedioate (C20-DC)	Lipid	Fatty Acid, Dicarboxylate		39831	LC/MS Neg	100002951	5200.9	341.27	75502	2424-92-2			0.8442	0.6434		0.7438		1.14868	0.574901		-0.704268
1295	malate	Energy	TCA Cycle		1303	LC/MS Neg	409	615.6	133.014	525	6915-15-7	C00149	HMDB00156	0.8512	0.739		0.7951		1.16941	0.529709		-0.70663
1750	3-hydroxylaurate	Lipid	Fatty Acid, Monohydroxy		32457	LC/MS Neg	100001112	5175	215.165	94216	53941-38-1		HMDB00387	0.6456	0.6148		0.6302		1.13375	0.711757		-0.707477
1403	docosapentaenoate (n6 DPA; 22:5n6)	Lipid	Long Chain Polyunsaturated Fatty Acid (n3 and n6)		37478	LC/MS Neg	100001580	5624.5	329.249	6441454	25182-74-5	C16513	HMDB01976	0.9306	0.6871		0.80885		1.27281	0.651525		-0.712117
4514	sulfate of piperine metabolite C18H21NO3 (3)*	Xenobiotics	Food Component/Plant		62299	LC/MS Neg	100020504	4630	378.102					0.3599	0.2934		0.32665		0.758472	0.604659		-0.714158
1580	N-acetyl-2-aminooctanoate*	Lipid	Fatty Acid, Amino		62059	LC/MS Neg	100020204	3943	200.129	95555			HMDB59745	0.8583	0.6251		0.7417		1.20081	0.640883		-0.716374
3022	androsterone sulfate	Lipid	Androgenic Steroids		31591	LC/MS Neg	100001073	5022	369.174	159663	2479-86-9		HMDB02759	0.6814	0.6764		0.6789		1.48772	1.12742		-0.71741
	X - 25265				62494	LC/MS Pos Early		517.4	346.009					0.8841	0.8575		0.8708		1.07247	0.279983		-0.720287
1374	erucate (22:1n9)	Lipid	Long Chain Monounsaturated Fatty Acid		1552	LC/MS Neg	1087	6355.6	337.311	5281116	112-86-7	C08316	HMDB02068	0.8611	0.8086		0.83485		1.334	0.692514		-0.720785
5332	succinimide	Xenobiotics	Chemical		41888	LC/MS Polar	100003696	2155	116.035	11439	123-56-8	C07273		0.9403	0.7214		0.83085		1.12822	0.411714		-0.722274
	X - 17351				48001	LC/MS Neg		3390	243.078					0.519	0.6491		0.58405		1.09691	0.708871		-0.723492
4572	ethyl alpha-glucopyranoside	Xenobiotics	Food Component/Plant		63152	LC/MS Pos Early	100015965	1248	226.129	428040	34625-23-5			0.2436	0.345		0.2943		1.10324	1.10763		-0.730329
53	N-acetyl-aspartyl-glutamate (NAAG)	Amino Acid	Glutamate Metabolism		35665	LC/MS Pos Early	100001612	1035	305.098	5255	3106-85-2	C12270	HMDB01067	0.6231	0.6444		0.63375		0.92412	0.395947		-0.733356
4164	5-acetylamino-6-formylamino-3-methyluracil	Xenobiotics	Xanthine Metabolism		34401	LC/MS Polar	100001402	1424	225.063	108214	85438-96-6	C16365	HMDB11105	0.7151	0.5567		0.6359		1.88656	1.69329		-0.738599
48	4-hydroxyglutamate	Amino Acid	Glutamate Metabolism		40499	LC/MS Pos Early	100002544	1141	164.055	439902	2485-33-8	C03079	HMDB01344	0.4267	0.3689		0.3978		0.968772	0.768702		-0.742774
1648	palmitoylcarnitine (C16)	Lipid	Fatty Acid Metabolism (Acyl Carnitine, Long Chain Saturated)		44681	LC/MS Pos Late	100000776	1425	400.342	461	6865-14-1	C02990	HMDB00222	0.9159	0.8039		0.8599		1.16417	0.404197		-0.752782
1638	hexanoylcarnitine (C6)	Lipid	Fatty Acid Metabolism (Acyl Carnitine, Medium Chain)		32328	LC/MS Pos Early	100000781	3358	260.186	6426853	6920-35-0		HMDB00705	0.753	0.8601		0.80655		1.13645	0.436432		-0.755899
1034	phenylacetylcarnitine	Peptide	Acetylated Peptides		48425	LC/MS Pos Early	100006108	3092	280.154	101724840	287108-21-8			0.1627	0.1627		0.1627		0.956512	1.04962		-0.756288
1279	N6-carboxymethyllysine	Carbohydrate	Advanced Glycation End-product		36713	LC/MS Pos Early	100001768	2500	205.118	123800	5746-04-03			0.8196	0.7757		0.79765		1.10033	0.398115		-0.760277
3056	5alpha-androstan-3beta,17alpha-diol disulfate	Lipid	Androgenic Steroids		37187	LC/MS Neg	100002021	4215	225.07					0.1959	0.1959		0.1959		1.54624	1.7748		-0.760837
3126	lithocholate sulfate (1)	Lipid	Secondary Bile Acid Metabolism		62526	LC/MS Neg	100020823	4811	227.12					0.453	0.3822		0.4176		1.45912	1.35975		-0.76597
1671	ximenoylcarnitine (C26:1)*	Lipid	Fatty Acid Metabolism (Acyl Carnitine, Monounsaturated)		57517	LC/MS Pos Late	100015836	1607	538.483					0.9157	0.7606		0.83815		1.14622	0.401655		-0.766991
1529	3-carboxy-4-methyl-5-propyl-2-furanpropanoate (CMPF)	Lipid	Fatty Acid, Dicarboxylate		31787	LC/MS Neg	100001178	2800	239.093	123979	86879-39-2		HMDB61112	0.1862	0.1702		0.1782		4.35566	5.44403		-0.767346
172	phenol sulfate	Amino Acid	Tyrosine Metabolism		32553	LC/MS Neg	100001510	2156	172.991	74426	937-34-8	C02180	HMDB60015	0.476	0.4447		0.46035		1.21883	0.981166		-0.773038
1751	3-hydroxymyristate	Lipid	Fatty Acid, Monohydroxy		21158	LC/MS Neg	100000882	5335	243.197	16064	3422-31-9			0.7464	0.7066		0.7265		1.04334	0.409733		-0.773274
	X - 21821				46998	LC/MS Neg		2930	243.078					0.5681	0.5619		0.565		1.16303	0.771373		-0.775283
1646	myristoylcarnitine (C14)	Lipid	Fatty Acid Metabolism (Acyl Carnitine, Long Chain Saturated)		33952	LC/MS Pos Late	100001270	1350	372.311	6426854	18822-89-4		HMDB05066	0.8558	0.7556		0.8057		1.13395	0.423184		-0.775663
	X - 13431				47788	LC/MS Pos Late		1015	302.232					0.765	0.6748		0.7199		1.21388	0.635752		-0.777007
1645	laurylcarnitine (C12)	Lipid	Fatty Acid Metabolism (Acyl Carnitine, Medium Chain)		34534	LC/MS Pos Late	100001392	1235	344.279	10427569	25518-54-1		HMDB02250	0.7308	0.6814		0.7061		1.10388	0.5107		-0.778899
4013	bilirubin	Cofactors and Vitamins	Hemoglobin and Porphyrin Metabolism		43807	LC/MS Pos Late	1090	1840	585.271	5280352	635-65-4	C00486	HMDB00054	0.8269	0.7188		0.77285		1.0627	0.372046		-0.779081
	X - 12283				47708	LC/MS Pos Early		2646	245.092					0.5339	0.4718		0.50285		1.03437	0.678166		-0.783758
1741	2-hydroxynervonate*	Lipid	Fatty Acid, Monohydroxy		61698	LC/MS Neg	100015638	6345	381.337	5312783				0.7866	0.8055		0.79605		1.1876	0.498996		-0.784684
	X - 23641				49517	LC/MS Pos Late		910	288.217					0.5151	0.5509		0.533		1.00976	0.606537		-0.786043
1387	eicosapentaenoate (EPA; 20:5n3)	Lipid	Long Chain Polyunsaturated Fatty Acid (n3 and n6)		18467	LC/MS Neg	2050	5450	301.217	446284	10-2005-9;10417-94-4	C06428	HMDB01999	0.7412	0.5743		0.65775		1.163	0.639896		-0.789582
	X - 23678				49555	LC/MS Pos Late		871	220.136					0.3948	0.3168		0.3558		1.02132	0.840213		-0.79209
3047	5alpha-androstan-3alpha,17beta-diol disulfate	Lipid	Androgenic Steroids		37184	LC/MS Neg	100002017	4275	225.07					0.1643	0.1643		0.1643		1.50591	1.68567		-0.79589
	X - 23659				49536	LC/MS Pos Early		2449	143.118					0.8025	0.5407		0.6716		1.14664	0.596663		-0.796155
4090	guaiacol sulfate	Xenobiotics	Benzoate Metabolism		46111	LC/MS Neg	100004208	2344	203.002	22473			HMDB60013	0.7224	0.7062		0.7143		1.24574	0.666635		-0.797192
	X - 11299				46592	LC/MS Neg		4886	507.222					0.1865	0.1653		0.1759		1.05991	1.1028		-0.801609
1681	docosapentaenoylcarnitine (C22:5n3)*	Lipid	Fatty Acid Metabolism (Acyl Carnitine, Polyunsaturated)		57529	LC/MS Pos Late	100015851	1387	474.358					0.4132	0.303		0.3581		0.793312	0.542534		-0.802183
	X - 16946				46517	LC/MS Neg		3240	317.115					0.8075	0.7607		0.7841		1.16421	0.472894		-0.8038
4036	carotene diol (2)	Cofactors and Vitamins	Vitamin A Metabolism		57636	LC/MS Pos Late	100015967	1904	568.428					0.7307	0.7473		0.739		1.10176	0.449878		-0.806353
4439	indolin-2-one	Xenobiotics	Food Component/Plant		43374	LC/MS Pos Early	100004318	2575	134.06	321710	59-48-3	C12312		0.4041	0.4187		0.4114		1.0631	0.807131		-0.807423
3856	3-ureidopropionate	Nucleotide	Pyrimidine Metabolism, Uracil containing		3155	LC/MS Polar	1053	2230	131.046	111	462-88-4	C02642	HMDB00026	0.8461	0.8835		0.8648		1.12673	0.324176		-0.807981
1710	3-hydroxybutyrate (BHBA)	Lipid	Ketone Bodies		542	LC/MS Polar	254	1480	103.04	441	625-72-9	C01089	HMDB00357	0.5396	0.4974		0.5185		1.8116	1.5985		-0.808945
1370	eicosenoate (20:1n9 or 1n11)	Lipid	Long Chain Monounsaturated Fatty Acid		33587	LC/MS Neg	100001335	5950	309.28	5282768		C16526	HMDB02231	0.7809	0.7501		0.7655		1.33754	0.706982		-0.809135
	X - 24241				52280	LC/MS Pos Early		2239	186.112					0.6485	0.7006		0.67455		1.0244	0.432288		-0.80929
556	gamma-glutamyl-alpha-lysine	Peptide	Gamma-glutamyl Amino Acid		55015	LC/MS Pos Early	100010901	2784	276.155	65254				0.8966	0.8449		0.87075		1.04189	0.210779		-0.81195
4039	beta-cryptoxanthin	Cofactors and Vitamins	Vitamin A Metabolism		57591	LC/MS Pos Late	100001977	2560	552.433	6384256	472-70-8		HMDB33844	0.5084	0.5046		0.5065		1.07601	0.699261		-0.814449
	X - 17612				48052	LC/MS Neg		4308	567.319					0.2539	0.2539		0.2539		0.8321	0.7086		-0.815975
60	S-1-pyrroline-5-carboxylate	Amino Acid	Glutamate Metabolism		42370	LC/MS Pos Early	35	1528	114.055	1196	2906-39-0	C04322	HMDB01301	0.6064	0.5012		0.5538		0.956272	0.492422		-0.817332
1702	3-hydroxyoleoylcarnitine	Lipid	Fatty Acid Metabolism (Acyl Carnitine, Hydroxy)		61840	LC/MS Pos Late	100019801	1406	442.353					0.5974	0.6473		0.62235		1.28958	0.814292		-0.819403
1665	myristoleoylcarnitine (C14:1)*	Lipid	Fatty Acid Metabolism (Acyl Carnitine, Monounsaturated)		48182	LC/MS Pos Late	100006051	1316	370.295	90659872	889848-55-9			0.7543	0.6566		0.70545		1.19956	0.602908		-0.819551
3026	5alpha-androstan-3alpha,17alpha-diol monosulfate	Lipid	Androgenic Steroids		37183	LC/MS Neg	100002008	5208	371.19					0.3592	0.3592		0.3592		1.12005	0.928107		-0.81979
1528	docosadioate (C22-DC)	Lipid	Fatty Acid, Dicarboxylate		39837	LC/MS Neg	100002952	5291.8	369.301	244872	505-56-6	C19625		0.4648	0.5392		0.502		1.19296	0.841377		-0.821226
424	homoarginine	Amino Acid	Urea cycle; Arginine and Proline Metabolism		22137	LC/MS Pos Early	100000961	2882	189.135	9085	156-86-5	C01924	HMDB00670	0.7507	0.7997		0.7752		1.19492	0.510491		-0.822188
454	dimethylguanidino valeric acid (DMGV)*	Amino Acid	Urea cycle; Arginine and Proline Metabolism		62783	LC/MS Pos Early	100020866	1891	202.119					0.8284	0.3213		0.57485		0.957828	0.465586		-0.822572
4560	thymol sulfate	Xenobiotics	Food Component/Plant		36095	LC/MS Neg	100001757	4410	229.054		89-83-8	C09908	HMDB01878	0.3522	0.3886		0.3704		2.05436	2.03534		-0.827361
	X - 25172				62151	LC/MS Pos Early		1452	191.102					0.202	0.202		0.202		1.15794	1.14507		-0.834828
281	3-indoxyl sulfate	Amino Acid	Tryptophan Metabolism		27672	LC/MS Neg	100000467	2222.2	212.002	10258	2642-37-7		HMDB00682	0.539	0.5255		0.53225		1.21102	0.808654		-0.839382
3764	adenosine 3',5'-cyclic monophosphate (cAMP)	Nucleotide	Purine Metabolism, Adenine containing		2831	LC/MS Neg	207	1952.2	328.045	6076	60-92-4	C00575	HMDB00058	0.6844	0.6844		0.6844		0.916564	0.27566		-0.842212
289	leucine	Amino Acid	Leucine, Isoleucine and Valine Metabolism		60	LC/MS Pos Early	397	2864	132.102		61-90-5			0.8991	0.9089		0.904		1.1248	0.261081		-0.845713
1690	pimeloylcarnitine/3-methyladipoylcarnitine (C7-DC)	Lipid	Fatty Acid Metabolism (Acyl Carnitine, Dicarboxylate)		53224	LC/MS Pos Early	100009407	2773	304.175					0.5111	0.5978		0.55445		1.11767	0.665173		-0.84673
5361	6-hydroxyindole sulfate	Xenobiotics	Chemical		48698	LC/MS Neg	100006260	2498	212.002	122198196				0.5108	0.4689		0.48985		1.26894	0.917192		-0.849426
1466	(16 or 17)-methylstearate (a19:0 or i19:0)	Lipid	Fatty Acid, Branched		38296	LC/MS Neg	100002356	5993	297.28	3083779	2724-59-6		HMDB37397	0.6927	0.8321		0.7624		1.09025	0.384886		-0.851817
39	asparagine	Amino Acid	Alanine and Aspartate Metabolism		512	LC/MS Pos Early	917	1225	133.061	6267	70-47-3	C00152	HMDB00168	0.8892	0.8429		0.86605		0.988968	0.144026		-0.853442
456	creatine	Amino Acid	Creatine Metabolism		27718	LC/MS Pos Early	1221	1947	132.077	586	57-00-1	C00300	HMDB00064	0.7445	0.7126		0.72855		1.06264	0.38662		-0.86414
	X - 12216				46613	LC/MS Neg		1691	227.997					0.1138	0.1138		0.1138		1.47504	1.5718		-0.866039
	X - 17653				46707	LC/MS Neg		5128	365.269					0.6808	0.7365		0.70865		1.03922	0.380938		-0.867779
4548	stachydrine	Xenobiotics	Food Component/Plant		34384	LC/MS Pos Early	100001296	1440	144.102	115244	4136-37-2	C10172	HMDB04827	0.3591	0.3406		0.34985		1.40559	1.21552		-0.868553
4359	cinnamoylglycine	Xenobiotics	Food Component/Plant		38637	LC/MS Neg	100002253	3127	204.067	709625	16534-24-0		HMDB11621	0.0958	0.0958		0.0958		1.50164	1.61266		-0.871753
1634	acetylcarnitine (C2)	Lipid	Fatty Acid Metabolism (Acyl Carnitine, Short Chain)		32198	LC/MS Pos Early	100000802	2282	204.123	1	5080-50-2	C02571	HMDB00201	0.8277	0.8097		0.8187		1.09546	0.315538		-0.877106
1346	nonadecanoate (19:0)	Lipid	Long Chain Saturated Fatty Acid		1356	LC/MS Neg	892	6068	297.28	12591	646-30-0	C16535	HMDB00772	0.9126	0.8446		0.8786		1.07937	0.228591		-0.878285
	X - 18901				46690	LC/MS Neg		3800	211.025					0.1983	0.204		0.20115		1.00468	0.909116		-0.883863
1649	margaroylcarnitine (C17)*	Lipid	Fatty Acid Metabolism (Acyl Carnitine, Long Chain Saturated)		57512	LC/MS Pos Late	100004054	1424	414.358		106182-29-0		HMDB06210	0.7494	0.6736		0.7115		1.10826	0.442749		-0.89612
1644	decanoylcarnitine (C10)	Lipid	Fatty Acid Metabolism (Acyl Carnitine, Medium Chain)		33941	LC/MS Pos Late	100001251	1130	316.248	10245190	1492-27-9		HMDB00651	0.7795	0.5374		0.65845		1.17484	0.568014		-0.909108
436	N-delta-acetylornithine	Amino Acid	Urea cycle; Arginine and Proline Metabolism		43249	LC/MS Neg	100004523	858	173.093	9920500				0.4394	0.42		0.4297		1.13692	0.777441		-0.909682
4132	p-cresol sulfate	Xenobiotics	Benzoate Metabolism		36103	LC/MS Neg	100001315	2890	187.007	4615423	3233-57-7		HMDB11635	0.2954	0.2893		0.29235		1.16116	0.953375		-0.9113
1514	tridecenedioate (C13:1-DC)*	Lipid	Fatty Acid, Dicarboxylate		62919	LC/MS Neg	100002199	3051	241.144					0.524	0.4334		0.4787		1.251	0.843578		-0.915505
1390	docosahexaenoate (DHA; 22:6n3)	Lipid	Long Chain Polyunsaturated Fatty Acid (n3 and n6)		44675	LC/MS Neg	100000665	5525	327.233	445580	6217-54-5	C06429	HMDB02183	0.7498	0.5413		0.64555		1.26142	0.67101		-0.917831
4033	retinol (Vitamin A)	Cofactors and Vitamins	Vitamin A Metabolism		1806	LC/MS Pos Late	498	1636	269.226	445354	68-26-8	C00473	HMDB00305	0.9173	0.8198		0.86855		1.05951	0.207078		-0.922155
407	N-methyltaurine	Amino Acid	Methionine, Cysteine, SAM and Taurine Metabolism		42989	LC/MS Polar	100004056	1650	138.023	7882	107-68-6			0.1605	0.1605		0.1605		1.27402	1.20721		-0.922387
	X - 21258				46259	LC/MS Neg		3915	213.023					0.3423	0.3407		0.3415		1.34584	1.08774		-0.923327
	X - 21310				46354	LC/MS Neg		2235	233.985					0.5578	0.5257		0.54175		1.05401	0.545042		-0.939858
476	acisoga	Amino Acid	Polyamine Metabolism		43258	LC/MS Neg	100004541	2297	183.114	129397	106692-36-8			0.6756	0.7546		0.7151		1.15628	0.467733		-0.943238
4571	4-allylphenol sulfate	Xenobiotics	Food Component/Plant		37181	LC/MS Neg	100001868	3805	213.023					0.1311	0.1187		0.1249		1.94394	1.92696		-0.943998
	X - 22519				47783	LC/MS Pos Early		3490	304.211					0.6683	0.6263		0.6473		1.12023	0.497189		-0.951212
115	2-aminoadipate	Amino Acid	Lysine Metabolism		6146	LC/MS Polar	381	3500	160.061	469	542-32-5;1118-90-7	C00956	HMDB00510	0.8129	0.5717		0.6923		1.07265	0.397429		-0.957032
1667	oleoylcarnitine (C18)	Lipid	Fatty Acid Metabolism (Acyl Carnitine, Monounsaturated)		35160	LC/MS Pos Late	100001501	1423	426.358	6441392	38677-66-6		HMDB05065	0.7729	0.7038		0.73835		1.0976	0.373326		-0.962286
9	serine	Amino Acid	Glycine, Serine and Threonine Metabolism		1648	LC/MS Pos Early	503	1239	106.05	5951	56-45-1	C00065	HMDB00187	0.8438	0.8357		0.83975		1.01375	0.180468		-0.964148
3131	taurolithocholate 3-sulfate	Lipid	Secondary Bile Acid Metabolism		36850	LC/MS Neg	100001658	5027	280.622	440071	64936-83-0	C03642	HMDB02580	0.0546	0.0375		0.04605		1.30733	1.30432		-0.967005
	X - 15469				46640	LC/MS Pos Late		785	304.212					0.6153	0.5977		0.6065		1.04823	0.453226		-0.974641
1650	stearoylcarnitine (C18)	Lipid	Fatty Acid Metabolism (Acyl Carnitine, Long Chain Saturated)		34409	LC/MS Pos Late	100001391	1485	428.373	6426855	18822-91-8		HMDB00848	0.7267	0.6519		0.6893		1.04844	0.367186		-0.978076
	X - 17655				48019	LC/MS Neg		4169	421.061					0.0349	0.0349		0.0349		0.0349	1.4164e-17		-0.979796
345	3-hydroxy-2-ethylpropionate	Amino Acid	Leucine, Isoleucine and Valine Metabolism		32397	LC/MS Neg	100001170	975	117.056	188979	4374-62-3		HMDB00396	0.7979	0.6602		0.72905		0.99762	0.272232		-0.986549
1670	nervonoylcarnitine (C24:1)*	Lipid	Fatty Acid Metabolism (Acyl Carnitine, Monounsaturated)		57531	LC/MS Pos Late	100015846	1602	510.452					0.8585	0.6347		0.7466		1.14132	0.398318		-0.990957
	X - 17346				47824	LC/MS Pos Early		1637	255.097					0.7079	0.5675		0.6377		1.0659	0.427883		-1.00074
1654	cerotoylcarnitine (C26)*	Lipid	Fatty Acid Metabolism (Acyl Carnitine, Long Chain Saturated)		57516	LC/MS Pos Late	100015835	1649	540.499				HMDB06347	0.6914	0.6178		0.6546		1.26302	0.606442		-1.00326
437	N-alpha-acetylornithine	Amino Acid	Urea cycle; Arginine and Proline Metabolism		32984	LC/MS Pos Early	100000285	2000	175.108	439232	6205-08-09	C00437	HMDB03357	0.4918	0.5201		0.50595		1.13041	0.608884		-1.02558
1680	adrenoylcarnitine (C22:4)*	Lipid	Fatty Acid Metabolism (Acyl Carnitine, Polyunsaturated)		57528	LC/MS Pos Late	100015850	1415	476.373					0.5847	0.6106		0.59765		1.1344	0.523084		-1.02612
4687	(S)-a-amino-omega-caprolactam	Xenobiotics	Food Component/Plant		63339	LC/MS Pos Early	100021329	2378	129.102	439823	21568-87-6	C05328		0.5668	0.5668		0.5668		0.930216	0.352693		-1.0304
2250	1-stearoyl-2-oleoyl-GPG (18:0/18:1)	Lipid	Phosphatidylglycerol (PG)		52623	LC/MS Polar	100001866	717	775.549		322647-48-3			0.8052	0.6484		0.7268		1.02004	0.284222		-1.03171
1641	octanoylcarnitine (C8)	Lipid	Fatty Acid Metabolism (Acyl Carnitine, Medium Chain)		33936	LC/MS Pos Late	100001247	950	288.217	123701	3671-77-0	C02838	HMDB00791	0.6913	0.6201		0.6557		1.12848	0.454525		-1.04017
3167	glycodeoxycholate 3-sulfate	Lipid	Secondary Bile Acid Metabolism		52975	LC/MS Neg	100006642	4875	263.628					0.3228	0.2837		0.30325		1.13932	0.802192		-1.04223
301	2-ketocaprylate	Amino Acid	Leucine, Isoleucine and Valine Metabolism		63120	LC/MS Neg	100020833	3951	157.087	67600	328-51-8		HMDB13211	0.3593	0.5133		0.4363		1.05927	0.593306		-1.05
4148	3-phenylpropionate (hydrocinnamate)	Xenobiotics	Benzoate Metabolism		15749	LC/MS Neg	100000010	2860	149.061	107	501-52-0	C05629	HMDB00764	0.0676	0.0676		0.0676		1.1122	0.978728		-1.0673
363	isobutyrylcarnitine (C4)	Amino Acid	Leucine, Isoleucine and Valine Metabolism		33441	LC/MS Pos Early	100001055	2810	232.154	168379	25518-49-4		HMDB00736	0.5883	0.5342		0.56125		1.01298	0.42047		-1.07435
3879	2'-O-methylcytidine	Nucleotide	Pyrimidine Metabolism, Cytidine containing		57554	LC/MS Pos Early	100010895	2411	258.108	150971	2140-72-9			0.7795	0.7713		0.7754		1.01243	0.216281		-1.09594
	X - 23587				49463	LC/MS Pos Early		1230	132.102					0.2545	0.2545		0.2545		1.14721	0.806858		-1.10641
238	tryptophan betaine	Amino Acid	Tryptophan Metabolism		37097	LC/MS Pos Early	100001743	2673	247.144	442106	20671-76-5	C09213	HMDB61115	0.2673	0.2461		0.2567		1.06344	0.71005		-1.13618
	X - 23997				52025	LC/MS Pos Early		1634	223.075					0.1195	0.1154		0.11745		1.04731	0.802109		-1.15927
3129	glycolithocholate sulfate*	Lipid	Secondary Bile Acid Metabolism		32620	LC/MS Neg	100001657	5011	255.631	72222	15324-64-8	C11301	HMDB02639	0.1181	0.1133		0.1157		1.21422	0.945233		-1.16217
3163	taurocholenate sulfate*	Lipid	Secondary Bile Acid Metabolism		32807	LC/MS Neg	100001990	4750	279.614					0.4136	0.4543		0.43395		1.29036	0.731357		-1.17098
	X - 21286				46295	LC/MS Neg		1550	164.036					0.5261	0.5154		0.52075		1.1273	0.516609		-1.17409
1336	10-undecenoate (11:1n1)	Lipid	Medium Chain Fatty Acid		32497	LC/MS Neg	100001197	5085.8	183.139	14891	1333-28-4	C13910	HMDB33724	0.473	0.4553		0.46415		1.08576	0.526948		-1.17965
1579	2-aminooctanoate	Lipid	Fatty Acid, Amino		43343	LC/MS Pos Late	100004227	750	160.133	69522	644-90-6		HMDB00991	0.3091	0.2849		0.297		1.07639	0.660134		-1.18066
5302	iminodiacetate (IDA)	Xenobiotics	Chemical		21025	LC/MS Pos Early	100000900	830	134.045	8897	142-73-4	C19911	HMDB11753	0.7476	0.7576		0.7526		1.0614	0.261406		-1.18132
1675	arachidonoylcarnitine (C20:4)	Lipid	Fatty Acid Metabolism (Acyl Carnitine, Polyunsaturated)		57518	LC/MS Pos Late	100015837	1353	448.342					0.7129	0.6232		0.66805		1.17706	0.414833		-1.22701
1662	undecenoylcarnitine (C11:1)	Lipid	Fatty Acid Metabolism (Acyl Carnitine, Monounsaturated)		63613	LC/MS Pos Late	100021131	1069	328.248					0.4997	0.3387		0.4192		1.13568	0.575111		-1.24581
1643	4-methylnonanoylcarnitine	Lipid	Fatty Acid Metabolism (Acyl Carnitine, Medium Chain)		63612	LC/MS Pos Late	100021138	1055	316.248					0.39	0.3288		0.3594		1.18231	0.655979		-1.25448
1495	maleate	Lipid	Fatty Acid, Dicarboxylate		20676	LC/MS Polar	100000707	2640	115.004	444266	110-16-7	C01384	HMDB00176	0.5724	0.58		0.5762		1.11174	0.426035		-1.25703
1652	behenoylcarnitine (C22)*	Lipid	Fatty Acid Metabolism (Acyl Carnitine, Long Chain Saturated)		57514	LC/MS Pos Late	100015832	1561	484.436					0.4797	0.4915		0.4856		1.11859	0.497735		-1.27175
397	cystine	Amino Acid	Methionine, Cysteine, SAM and Taurine Metabolism		56	LC/MS Pos Early	279	2000	241.031	67678	56-89-3	C00491	HMDB00192	0.7301	0.7126		0.72135		1.01027	0.225074		-1.28366
1683	docosahexaenoylcarnitine (C22:6)*	Lipid	Fatty Acid Metabolism (Acyl Carnitine, Polyunsaturated)		57523	LC/MS Pos Late	100015845	1349	472.342					0.3857	0.2952		0.34045		1.23098	0.659715		-1.34987
5323	perfluorooctanesulfonate (PFOS)	Xenobiotics	Chemical		57564	LC/MS Polar	100010955	662	498.93	74483	1763-23-1	C18142	HMDB59586	0.3588	0.3643		0.36155		1.35863	0.734313		-1.35784
1668	eicosenoylcarnitine (C20:1)*	Lipid	Fatty Acid Metabolism (Acyl Carnitine, Monounsaturated)		57519	LC/MS Pos Late	100015838	1484	454.389					0.628	0.4393		0.53365		1.14546	0.445333		-1.37382
5367	perfluorooctanoate (PFOA)	Xenobiotics	Chemical		62071	LC/MS Polar	100020208	685	412.966	9554			HMDB59587	0.2916	0.3298		0.3107		1.10785	0.579724		-1.37506
	X - 22162				47417	LC/MS Pos Early		960	150.058					0.6308	0.6414		0.6361		1.01456	0.272362		-1.38953
4	sarcosine	Amino Acid	Glycine, Serine and Threonine Metabolism		1516	LC/MS Pos Early	1023	1280	90.055	1088	107-97-1	C00213	HMDB00271	0.6565	0.6516		0.65405		1.06308	0.284599		-1.43723
1292	succinate	Energy	TCA Cycle		1437	LC/MS Polar	252	3149	117.019	1110	110-15-6	C00042	HMDB00254	0.8389	0.7822		0.81055		1.01263	0.139259		-1.45112
348	methylsuccinate	Amino Acid	Leucine, Isoleucine and Valine Metabolism		15745	LC/MS Polar	2051	2800	131.035	10349	498-21-5		HMDB01844	0.752	0.5855		0.66875		1.00536	0.22424		-1.50113
	X - 24736				53172	LC/MS Pos Early		2821	189.135					0.2985	0.3149		0.3067		0.966468	0.411746		-1.60237
4055	hippurate	Xenobiotics	Benzoate Metabolism		15753	LC/MS Neg	100000014	2106.9	178.051	464	495-69-2	C01586	HMDB00714	0.1957	0.1762		0.18595		1.14277	0.563687		-1.69743
396	cysteine s-sulfate	Amino Acid	Methionine, Cysteine, SAM and Taurine Metabolism		22176	LC/MS Polar	100000808	2273	199.969	115015	1637-71-4	C05824	HMDB00731	0.6558	0.7094		0.6826		1.07852	0.229077		-1.72834
	X - 24307				52502	LC/MS Neg		1342	171.078					0.5799	0.5801		0.58		1.1122	0.30258		-1.75887
36	N-acetylaspartate (NAA)	Amino Acid	Alanine and Aspartate Metabolism		22185	LC/MS Polar	100000787	3143	174.041	65065	997-55-7;997-55-7	C01042	HMDB00812	0.6735	0.6115		0.6425		1.09426	0.241559		-1.87017
	X - 25267				62496	LC/MS Pos Early		1419.1	307.113					0.3874	0.4046		0.396		1.10417	0.378003		-1.87345
1488	4-hydroxy-2-oxoglutaric acid	Lipid	Fatty Acid, Dicarboxylate	possible HAO1 product, would be derived from 2,4-Dihydroxy-glutaric acid	40062	LC/MS Polar	100002537	3073	161.009	599	1187-99-1	C01127	HMDB02070	0.4001	0.378		0.38905		1.01576	0.243158		-2.5774

## Sheet: ScaledImpData INDIVIDUAL
												SAMPLE NAME	QMUL-00224	QMUL-00225	QMUL-00226	QMUL-00227	QMUL-00228	QMUL-00229	QMUL-00230	QMUL-00231	QMUL-00232	QMUL-00233	QMUL-00234	QMUL-00235	QMUL-00236	QMUL-00237	QMUL-00238	QMUL-00239	QMUL-00240	QMUL-00241	QMUL-00242	QMUL-00243	QMUL-00244	QMUL-00245	QMUL-00246	QMUL-00247	QMUL-00248	QMUL-00252	QMUL-00253
												PARENT SAMPLE ID	6025985	6025986	6025987	6025988	6025989	6025990	6025991	6025992	6025993	6025994	6025995	6025996	6025997	6025998	6025999	6026000	6026001	6026002	6026003	6026004	6026005	6026006	6026007	6026008	6026009	6026013	6026014
												CLIENT IDENTIFIER	S2-003-31818	S2-003-31815	S2-003-31831	S2-003-31834	S2-003-31830	S2-003-31806	S2-003-31811	S2-003-31814	S2-003-31824	S2-003-31820	S2-003-31842	S2-002-34108	S2-002-34107	S2-002-34095	S2-002-34077	S2-002-34075	S2-002-34102	S2-002-34112	S2-002-34071	S2-002-34089	S2-002-34096	S2-002-34099	S00005-001	S00005-001	S2-006-00001	S2-003-31832	S2-002-34080
												ORIG ORDER	1	2	3	4	5	6	7	8	9	10	11	12	13	14	15	16	17	18	19	20	21	22	23	24	25	29	30
												SPL AMNT	250ul	250ul	250ul	250ul	250ul	250ul	250ul	250ul	250ul	250ul	250ul	250ul	250ul	250ul	250ul	250ul	250ul	250ul	250ul	250ul	250ul	250ul	250ul	250ul	250ul	250ul	250ul
												SPL TYPE	Control	Control	Control	Control	Control	Control	Control	Control	Control	Control	Control	Control	Control	Control	Control	Control	Control	Control	Control	Control	Control	Plasma	Plasma	Plasma	Plasma	Plasma	Plasma
												Status	Control	Control	Control	Control	Control	Control	Control	Control	Control	Control	Control	Control	Control	Control	Control	Control	Control	Control	Control	Control	Control	Control	HAO1 knockout individual	HAO1 knockout individual, replicate 2	Control	Control	Control
												Gender	male	male	female	female	female	female	female	male	female	male	female	female	male	male	male	female	female	female	female	female	female	female	female		male	female	female
												Ethnicity	British-Pakistani	British-Pakistani	British-Bangladeshi	British-Pakistani	British-Bangladeshi	British-Bangladeshi	British-Pakistani	British-Pakistani	British-Pakistani	British-Pakistani	British-Pakistani	British-Pakistani	British-Pakistani	British-Bangladeshi	British-Bangladeshi	British-Bangladeshi	British-Pakistani	British-Pakistani	British-Bangladeshi	British-Pakistani	British-Bangladeshi	British-Pakistani	British-Pakistani		British-Bangladeshi	British-Bangladeshi	British-Pakistani
												Age (decade, years) at sampling	30-39	40-49	30-39	30-39	30-39	10-19	30-39	40-49	40-49	30-39	40-49	30-39	60-69	60-69	50-59	20-29	30-39	50-59	40-49	30-39	20-29	50-59	40-49		40-49	30-39	20-29
PATHWAY SORTORDER	BIOCHEMICAL	SUPER PATHWAY	SUB PATHWAY	COMP ID	PLATFORM	CHEMICAL ID	RI	MASS	PUBCHEM	CAS	KEGG	Group HMDB	QMUL-00224	QMUL-00225	QMUL-00226	QMUL-00227	QMUL-00228	QMUL-00229	QMUL-00230	QMUL-00231	QMUL-00232	QMUL-00233	QMUL-00234	QMUL-00235	QMUL-00236	QMUL-00237	QMUL-00238	QMUL-00239	QMUL-00240	QMUL-00241	QMUL-00242	QMUL-00243	QMUL-00244	QMUL-00245	QMUL-00246	QMUL-00247	QMUL-00248	QMUL-00252	QMUL-00253
43	glutamine	Amino Acid	Glutamate Metabolism	53	LC/MS Pos Early	563	1291	147.076	5961	56-85-9	C00064	HMDB00641	1.0716	0.8636	0.9601	1.0486	0.8658	0.94	1.1545	1.1522	1.087	0.6166	0.8211	0.9179	1.235	1.137	1.061	0.9969	0.8701	0.9816	1.1014	0.8607	1.0389	1.0184	0.9645	0.9458	1.2748	1.1082	0.9329
229	tryptophan	Amino Acid	Tryptophan Metabolism	54	LC/MS Pos Early	565	2986	205.097	6305	73-22-3	C00078	HMDB00929	1.1577	0.8361	0.92	0.9933	0.8166	0.8945	1.0006	0.9705	1.016	0.9936	1.0708	1.0204	0.9874	1.1074	1.324	0.8438	1.1363	0.9994	0.8382	0.8819	0.9812	0.8038	1.0795	1.1126	1.1559	1.0116	1.0781
3857	beta-alanine	Nucleotide	Pyrimidine Metabolism, Uracil containing	55	LC/MS Pos Early	244	1905	90.055	239	56-41-7;107-95-9	C00099	HMDB00056	1.5448	0.9404	0.7424	0.9074	1.7735	0.987	1.3342	1.18	1.1312	1.0097	2.2624	0.7291	1.2816	0.967	0.7199	0.9903	1.0218	1.1282	0.98	0.8466	0.9148	0.948	1.3531	1.2754	1.038	1.1104	0.9486
397	cystine	Amino Acid	Methionine, Cysteine, SAM and Taurine Metabolism	56	LC/MS Pos Early	279	2000	241.031	67678	56-89-3	C00491	HMDB00192	0.5841	1.1015	0.6375	0.7973	0.816	0.7727	0.744	0.9864	0.8348	1.3118	1.0136	1.2809	1.3898	1.233	1.1573	1.1192	1.0508	0.9843	1.0425	1.3985	1.0682	1.2079	0.7301	0.7126	1.0309	0.8885	0.8052
42	glutamate	Amino Acid	Glutamate Metabolism	57	LC/MS Pos Early	561	1500	148.06	611	56-86-0	C00025	HMDB00148	0.7658	0.9777	0.5799	1.1188	1.6283	1.8979	0.4079	1.8413	0.4157	3.7311	1.2101	0.9816	1.1932	1.8147	2.0514	1.0102	0.9898	0.7623	0.4985	1.1598	1.6478	1.7235	0.9203	0.877	2.0335	1.2626	0.7329
1	glycine	Amino Acid	Glycine, Serine and Threonine Metabolism	58	LC/MS Pos Early	340	1375	76.0393	750	56-40-6	C00037	HMDB00123	0.9959	0.6638	0.7311	1.2809	1.218	1.5796	1.1845	0.9209	0.9285	0.5044	0.5675	0.5139	1.0041	1.0792	1.19	1.2446	0.9118	0.8247	1.7906	0.851	1.6693	1.1706	1.0791	1.0384	0.8027	1.2807	0.9209
67	histidine	Amino Acid	Histidine Metabolism	59	LC/MS Neg	355	755.9	154.062	6274	5934-29-2	C00135	HMDB00177	0.9739	0.9935	1.1974	1.0211	0.7899	1.0658	1.19	0.9738	1.26	0.5918	1.0355	0.8619	1.2232	0.8885	1.0752	0.9736	0.8102	0.8366	0.9149	0.847	1.0065	0.8335	1.0704	1.0324	1.103	1.0678	0.8524
289	leucine	Amino Acid	Leucine, Isoleucine and Valine Metabolism	60	LC/MS Pos Early	397	2864	132.102		61-90-5			1.596	1.1035	1.1948	0.8228	1.2996	0.911	0.9187	1.1151	1.3135	1.6988	1.2465	0.9601	1.0021	1.4773	1.389	0.9976	0.9716	0.7984	0.9902	0.8084	1.1868	0.9979	0.8991	0.9089	1.4965	1.0979	0.7259
2880	cholesterol	Lipid	Sterol	63	LC/MS Pos Late	266	2707	369.352	11025495	57-88-5	C00187	HMDB00067	0.9932	0.9594	1.0483	0.8156	0.927	0.836	1.0757	0.8708	1.4044	1.6802	0.945	0.9502	1.0068	0.7167	0.6156	1.2335	1.2213	1.1406	0.8885	0.874	1.3555	1.3224	1.1539	1.0721	1.3526	1.2731	0.7921
130	phenylalanine	Amino Acid	Phenylalanine Metabolism	64	LC/MS Pos Early	460	2878	166.086	6140	63-91-2	C00079	HMDB00159	1.1694	0.7836	0.9561	0.8955	0.9501	1.0007	1.0178	1.1074	1.0365	0.9856	1.0055	0.9449	1.1227	1.0455	0.986	0.9523	0.9788	1.1075	1.0501	0.9826	0.8831	0.8365	1.0096	0.9993	1.191	1.0592	0.8991
1483	glutarate (C5-DC)	Lipid	Fatty Acid, Dicarboxylate	396	LC/MS Polar	339	2900	131.035	743	110-94-1	C00489	HMDB00661	0.8466	3.6172	1.1405	0.7682	1.9978	1.0619	1	1.2172	0.7979	0.7799	0.2739	0.2739	0.8612	1.8213	1.1404	0.5998	1.004	0.4789	1.2713	0.7772	3.1102	0.6348	1.2808	1.2758	1.1495	2.0315	0.3036
35	aspartate	Amino Acid	Alanine and Aspartate Metabolism	443	LC/MS Pos Early	234	1165	134.045	5960	56-84-8	C00049	HMDB00191	0.7182	0.6933	0.6917	0.7914	1.0631	1.1206	0.7926	1.0365	0.7457	1.4427	1.0686	1.0129	0.9871	0.9022	1.099	0.8476	1.2988	0.5961	0.6771	1.0195	0.9469	1.2881	1.4991	1.3991	1.0351	1.2304	1.1676
470	spermidine	Amino Acid	Polyamine Metabolism	485	LC/MS Pos Late	50	700	146.165	1102	124-20-9	C00315	HMDB01257	1.1943	0.5972	1.1961	0.8888	1.3993	0.8145	2.0283	0.6033	0.9063	0.654	0.8106	0.7649	2.2137	1.4695	0.7193	0.7073	1.4326	1.2025	1.397	1.0231	1.081	1.2539	0.8786	0.9413	1.4413	2.9039	2.6227
39	asparagine	Amino Acid	Alanine and Aspartate Metabolism	512	LC/MS Pos Early	917	1225	133.061	6267	70-47-3	C00152	HMDB00168	1.0162	0.8178	0.9661	0.9444	0.7925	1.0235	1.2444	1.2355	1.0698	0.6488	0.8369	1.0251	1.2106	1.1607	1.1163	0.999	0.9702	0.8185	1.0268	0.9338	1.0378	0.857	0.8892	0.8429	1.037	0.9456	0.9899
457	creatinine	Amino Acid	Creatine Metabolism	513	LC/MS Pos Early	275	2055	114.066	588	60-27-5	C00791	HMDB00562	1.4722	0.828	1.0491	0.9372	0.8506	0.8513	1.0324	1.0014	1.1558	0.8324	0.9751	0.8934	1.2576	1.1184	1.0603	1.0462	0.9185	1.1852	1.0793	0.9607	0.9063	0.9974	1.1749	1.1487	1.2445	0.9949	0.9581
3868	cytidine	Nucleotide	Pyrimidine Metabolism, Cytidine containing	514	LC/MS Pos Early	827	2124	244.093	6175	65-46-3	C00475	HMDB00089	0.3672	1.1547	1.2019	1.1257	0.3542	0.8349	0.8757	1.1792	1.8513	0.1738	1.5295	1.3874	0.9584	1.016	3.2242	0.8237	0.9068	0.922	1.1799	0.8494	0.984	1.5997	0.9671	0.7364	1.0248	0.7826	0.3898
1090	lactate	Carbohydrate	Glycolysis, Gluconeogenesis, and Pyruvate Metabolism	527	LC/MS Polar	482	1469	89.0244	612	79-33-4	C00186	HMDB00190	1.6044	2.9561	1.319	0.9906	1.4105	0.9408	0.6365	1.6461	1.349	1.7774	1.6155	0.6536	1.1517	1.0945	1.0749	1.2425	0.8135	0.9463	0.5806	0.5318	0.7459	0.8011	1.0094	1.0157	0.8746	0.9574	0.6571
1289	alpha-ketoglutarate	Energy	TCA Cycle	528	LC/MS Polar	93	2700	145.014	51	305-72-6;328-50-7;22202-68-2	C00026	HMDB00208	0.9049	1.5847	0.9528	1.2345	1.2343	1.0543	0.8159	1.3303	0.7209	1.0425	1.069	0.7377	1.1718	0.9855	0.9477	0.7734	0.8275	1.1158	0.7955	0.972	1.0034	1.1727	0.8917	0.9966	1.0331	1.2035	0.9141
2865	3-hydroxy-3-methylglutarate	Lipid	Mevalonate Metabolism	531	LC/MS Polar	112	2850	161.046	1662	503-49-1	C03761	HMDB00355	0.6964	1.0279	0.8914	1.5237	1.715	0.7154	0.8533	1.4312	0.9211	0.9721	0.9686	1.1831	1.147	1.2109	1.9005	0.7335	0.6588	1.1331	0.924	1.0657	0.8031	1.2712	0.8152	1.0418	0.7595	1.0626	0.6021
149	4-hydroxyphenylacetate	Amino Acid	Phenylalanine Metabolism	541	LC/MS Neg	144	1361	151.04	127	156-38-7	C00642	HMDB00020	1.561	1	1.4357	0.8355	0.6075	0.9699	0.6075	1.6573	1.4719	0.6075	0.7451	0.6492	0.6256	6.1295	1.6003	0.6075	0.8449	0.6075	0.9676	0.6075	0.6075	2.2281	2.9606	2.0517	1.2274	0.6678	0.6075
1710	3-hydroxybutyrate (BHBA)	Lipid	Ketone Bodies	542	LC/MS Polar	254	1480	103.04	441	625-72-9	C01089	HMDB00357	0.4969	6.5947	0.2532	0.7626	1.6479	4.6463	1.1562	1.0417	0.7602	3.5341	0.5093	0.9828	0.8264	0.8104	1.3655	1.3121	0.5672	3.0777	1.0052	2.8072	1.5071	4.469	0.5396	0.4974	0.9698	0.9948	3.1917
4166	cotinine	Xenobiotics	Tobacco Metabolite	553	LC/MS Pos Early	848	2213	177.102	854019	486-56-6		HMDB01046	0.7218	0.0725	0.0725	0.0725	0.0725	0.0725	0.0725	0.0725	0.0725	1.2782	0.0725	0.0725	0.0725	2.7271	0.0725	0.0725	0.0725	0.0725	0.0725	0.0725	1.9868	0.0725	0.0725	0.0725	0.0989	0.0725	0.0725
3769	adenine	Nucleotide	Purine Metabolism, Adenine containing	554	LC/MS Pos Early	880	2221	136.062	190	73-24-5	C00147	HMDB00034	0.3699	0.586	0.9418	1.1727	0.6355	0.8345	1.0206	0.8183	1.1031	0.4919	1.4107	0.9705	1.5406	1.0458	1.5263	1.0002	1.8647	0.7214	0.9998	0.8093	0.6565	0.4498	1.1563	1.1013	1.0968	0.964	0.4868
140	phenylpyruvate	Amino Acid	Phenylalanine Metabolism	566	LC/MS Neg	241	2515	163.04	997	156-06-9	C00166	HMDB00205	1.377	1.4223	1.3546	0.8335	1.0949	0.7676	0.5721	1.0783	0.9987	0.9649	1.0497	0.816	1.0013	0.5182	0.8643	0.9639	1.1993	1.3389	0.7135	0.7723	0.8696	0.5057	1.2038	1.002	1.0091	0.8522	0.9747
4150	caffeine	Xenobiotics	Xanthine Metabolism	569	LC/MS Pos Early	849	2106	195.088	2519	58-08-2	C07481	HMDB01847	0.3142	1.0538	3.776	0.6817	2.6708	0.0791	0.027	1.1547	1.6468	0.4424	2.3026	1.6806	0.4493	1.0077	0.6583	0.6264	0.3251	0.9923	0.1244	0.4954	0.3728	0.166	2.4511	2.3233	1.0217	1.1786	0.0808
1119	arabinose	Carbohydrate	Pentose Metabolism	575	LC/MS Polar	828	1804.5	195.051	66308	28697-53-2	C00216	HMDB00646	0.9734	1.3973	0.8445	0.6723	1.4395	0.1539	0.9922	1.2531	1.2069	2.0677	1.4525	0.1539	1.4362	0.9122	1.0575	0.7822	1.0226	0.1973	0.1539	0.7717	0.1539	0.2926	1.0078	0.1539	0.1539	0.1539	0.1539
4311	gluconate	Xenobiotics	Food Component/Plant	587	LC/MS Polar	338	2922	195.051	10690	527-07-1	C00257	HMDB00625	0.5288	2.0676	1.0034	1.0056	2.0818	0.4666	0.9346	1.4577	0.8908	2.8063	1.0437	0.9966	0.9405	0.7492	1.1258	0.764	1.0671	0.9122	1.0234	1.0442	1.0301	1.0324	1.1375	1.0486	0.7286	0.9227	0.5607
405	hypotaurine	Amino Acid	Methionine, Cysteine, SAM and Taurine Metabolism	590	LC/MS Polar	358	2763.4	108.013	107812	300-84-5	C00519	HMDB00965	0.3203	0.896	0.4866	0.8063	1.1768	0.6852	1.5647	1.3952	1	0.5603	0.7383	0.7988	1.183	1.2091	0.73	0.89	1.2687	1.4053	0.7622	1.1838	1.1264	1	1.3008	1.1973	0.7238	0.8487	1.2901
3916	nicotinamide	Cofactors and Vitamins	Nicotinate and Nicotinamide Metabolism	594	LC/MS Pos Early	432	1942	123.055	936	98-92-0	C00153	HMDB01406	0.4501	0.6503	1.0117	0.5518	1.0179	1.2789	1.0984	0.6242	0.908	0.5341	0.7939	1.35	1.1549	0.7325	1.1292	1.7245	1.9822	1.2182	0.9277	0.8935	0.7664	0.9883	1.6122	1.5195	1.1154	1.3988	1.8023
3824	dihydroorotate	Nucleotide	Pyrimidine Metabolism, Orotate containing	601	LC/MS Polar	923	1910	157.025	648	155-54-4	C00337	HMDB03349	1.0284	0.7752	1.3448	1.1333	1.3333	1.0947	1.6556	1.2358	1.6741	1.1635	0.9619	0.5902	2.7295	0.7254	0.5791	1.3194	0.4829	0.8407	0.8539	0.6236	0.8298	2.7905	1.619	1.3696	1.3646	0.6542	0.623
3837	uridine	Nucleotide	Pyrimidine Metabolism, Uracil containing	606	LC/MS Neg	535	1457.6	243.062	6029	58-96-8	C00299	HMDB00296	0.7942	1.1317	0.5866	0.9968	0.9789	1.2077	0.9241	0.8781	0.8211	0.5201	0.7199	0.8303	1.0411	1.1641	1.1193	1.0974	1.0475	1.0883	1.0032	1.1746	1.0488	1.0577	0.897	0.8536	1.8755	1.1089	1.1098
74	trans-urocanate	Amino Acid	Histidine Metabolism	607	LC/MS Pos Early	537	2285	139.05	736715	104-98-3	C00785	HMDB00301	0.461	0.9898	0.6258	1.4284	1.0278	1.2479	0.4755	1.4736	0.6325	1.385	0.6487	0.948	1.1907	0.5111	0.4403	0.6315	0.6374	2.0249	0.8185	1.0754	0.8948	1.1611	1.092	1.0102	0.5827	2.0484	2.5386
2882	7-dehydrocholesterol	Lipid	Sterol	1099	LC/MS Pos Late	264	2467	367.336	439423	434-16-2	C01164	HMDB00032	0.3534	0.3534	1.0901	0.3534	0.3534	0.3534	1.1446	1.0167	1.9461	4.6328	0.7824	0.3534	0.8979	0.6424	0.3534	1.3057	0.7124	0.8675	0.3534	0.4119	1.3931	0.9378	1	0.3534	1.0682	1.4141	0.3731
192	homovanillate (HVA)	Amino Acid	Tyrosine Metabolism	1101	LC/MS Neg	117	1649	181.051	1738	306-08-1	C05582	HMDB00118	0.673	1	1.7237	0.673	0.673	0.673	0.673	0.673	0.9322	0.673	1.2523	0.673	1.135	1.2748	0.673	0.673	0.8264	1.4123	0.673	0.673	0.673	0.739	1.0732	1.0352	0.8953	0.7541	0.673
1394	linoleate (18:2n6)	Lipid	Long Chain Polyunsaturated Fatty Acid (n3 and n6)	1105	LC/MS Neg	180	5535	279.233	5280450	60-33-3	C01595	HMDB00673	0.2029	0.7381	0.3053	0.5102	1.8038	2.2754	0.6461	0.9959	0.3036	1.2839	0.4385	0.6781	1.24	0.6013	0.4842	2.0216	0.6532	1.9974	1.0041	1.8647	1.4096	3.498	1.1222	1.0472	1.2559	1.793	1.4152
3755	allantoin	Nucleotide	Purine Metabolism, (Hypo)Xanthine/Inosine containing	1107	LC/MS Polar	1002	1672	157.037	204	97-59-6	C02350	HMDB00462	1.1921	1.1644	0.9844	1.0403	0.9328	0.8523	0.8809	1.0306	1.0909	1.1787	1.2081	0.9067	1.1451	0.7114	1.0874	0.8326	0.8127	0.8344	0.7513	0.6546	0.9964	1.0497	1.0036	0.9755	1.0439	0.75	0.7659
1400	arachidonate (20:4n6)	Lipid	Long Chain Polyunsaturated Fatty Acid (n3 and n6)	1110	LC/MS Neg	229	5535	303.233	444899	506-32-1	C00219	HMDB01043	0.1734	0.7486	1.1931	1.0787	1.4716	1.5945	0.8842	0.6138	0.4419	1.0972	0.963	1.267	1.1916	0.7859	0.6106	1.4147	0.7326	1.72	0.8922	1.2899	1.641	1.9079	0.9798	0.6491	0.8593	2.1667	1.0541
3112	deoxycholate	Lipid	Secondary Bile Acid Metabolism	1114	LC/MS Neg	302	5294	391.285	222528	83-44-3	C04483	HMDB00626	2.3538	3.7716	1.21	2.0868	0.9745	0.3031	0.5665	0.3876	1.8389	0.3088	0.7172	0.8044	1.385	2.9595	0.3031	0.9979	2.5268	0.4628	1.042	0.5758	0.3031	0.4204	2.7128	2.3783	0.5541	1.9425	1.0021
1344	margarate (17:0)	Lipid	Long Chain Saturated Fatty Acid	1121	LC/MS Neg	891	5731	269.249	10465	506-12-7		HMDB02259	0.5235	1.1655	0.5992	0.7534	1.3429	1.4751	0.9036	1.0385	0.6651	1.4306	0.6362	0.8539	1.1852	0.8826	0.7232	1.2222	0.8426	2.0262	0.8302	1.3009	1.3872	2.6109	0.9615	0.8958	1.3346	1.2362	1.84
3743	inosine	Nucleotide	Purine Metabolism, (Hypo)Xanthine/Inosine containing	1123	LC/MS Neg	361	1602.1	267.074	6021	58-63-9	C00294	HMDB00195	0.3924	1.0784	0.3924	0.7901	0.8406	1.3631	1.1522	1.0465	0.8959	0.9878	1	0.985	1.3615	0.8604	0.3924	0.7727	0.8467	1.2717	1.0649	1.2705	0.6872	1.0923	0.895	0.9307	1.8255	1.1982	1.2527
1945	myo-inositol	Lipid	Inositol Metabolism	1124	LC/MS Polar	363	3506.3	225.062	892	87-89-8	C00137	HMDB00211	1.2003	0.9436	0.9959	1.0041	1.1824	0.7843	1.5942	0.9205	1.1982	0.9011	0.9799	0.7026	1.3457	0.8524	1.0726	0.8656	0.8066	1.2117	1.1347	0.6021	0.7642	0.9026	1.0628	1.097	0.9079	1.1243	0.636
329	isoleucine	Amino Acid	Leucine, Isoleucine and Valine Metabolism	1125	LC/MS Pos Early	376	2800	132.102	6306	73-32-5	C00407	HMDB00172	1.6672	1.0659	1.0384	0.7498	1.326	0.9111	0.8496	1.0799	1.2911	1.7066	1.2958	0.806	0.9727	1.4934	1.4215	1.01	0.99	0.8397	0.9065	0.8085	1.0606	1.078	0.9256	0.9347	1.2953	0.982	0.7048
28	alanine	Amino Acid	Alanine and Aspartate Metabolism	1126	LC/MS Pos Early	811	1700	90.055	5950	56-41-7	C00041	HMDB00161	1.2153	1.3558	0.9245	0.9753	1.0799	0.9688	0.8524	1.5354	0.9873	1	0.9904	0.713	1.0726	1.3858	1.4999	0.9297	0.8321	1.008	0.7142	0.6561	1.0602	0.7628	1.0166	1	1.1698	1.0371	0.6645
16	threonine	Amino Acid	Glycine, Serine and Threonine Metabolism	1284	LC/MS Pos Early	564	1514	120.066	6288	72-19-5	C00188	HMDB00167	1.0497	0.7962	0.705	0.952	0.6827	0.8416	1.1203	1.2528	1.227	0.6156	0.7507	1.2611	0.9891	1.1501	1.3704	1.1335	1.0029	0.9971	0.9783	1.1665	0.9433	0.684	1.1501	1.1085	1.2678	1.0488	0.9823
152	tyrosine	Amino Acid	Tyrosine Metabolism	1299	LC/MS Pos Early	815	2430	182.081	6057	60-18-4	C00082	HMDB00158	1.083	0.5169	1.1277	1.0078	0.575	0.9627	1.0026	1.028	0.8484	1.0106	0.9489	0.7588	0.9974	0.9331	0.9615	0.8401	1.0779	1.0029	0.7459	0.7854	1.0905	0.9123	1.1245	1.0533	1.2869	0.7728	0.7822
98	lysine	Amino Acid	Lysine Metabolism	1301	LC/MS Pos Early	407	2850	147.113	5962	56-87-1	C00047	HMDB00182	0.9985	1.0731	1.0015	0.9658	0.9714	1.0621	1.0436	0.8117	1.2414	1.1416	1.0058	0.9453	1.0242	1.2336	1.1935	0.9892	0.8502	0.8931	0.9157	0.9608	1.2073	1.1536	0.9586	1.02	1.4379	1.0805	0.7845
371	methionine	Amino Acid	Methionine, Cysteine, SAM and Taurine Metabolism	1302	LC/MS Pos Early	415	2526	150.058	6137	63-68-3	C00073	HMDB00696	1.321	0.7389	0.8932	0.8515	0.8134	1.0291	1.0824	1.0084	1.1987	0.8888	0.9242	0.8448	1.2822	1.2934	1.3192	1.1759	0.989	0.9551	1.0528	0.9726	1.095	0.8553	1.0735	1.0691	1.3009	0.9423	0.9916
1295	malate	Energy	TCA Cycle	1303	LC/MS Neg	409	615.6	133.014	525	6915-15-7	C00149	HMDB00156	0.9007	3.2872	0.818	0.9864	1.1773	1.4859	0.9641	1.9004	0.9678	0.6818	0.87	0.7293	1.5331	1.0775	1.7286	1.0752	0.9946	1.1351	0.8489	0.9097	1.025	1.1324	0.8512	0.739	0.9261	1.0747	1.0054
1343	palmitate (16:0)	Lipid	Long Chain Saturated Fatty Acid	1336	LC/MS Neg	424	5618	255.233	985	57-10-3	C00249	HMDB00220	0.5195	1.2169	0.5848	0.7318	1.7425	1.6768	0.9061	1.0916	0.6679	1.4197	0.8652	0.9105	1.4322	0.7841	0.7116	1.2504	0.8201	1.9524	0.842	1.4413	1.2444	2.6677	1.0348	0.9652	1.549	1.423	1.7275
1346	nonadecanoate (19:0)	Lipid	Long Chain Saturated Fatty Acid	1356	LC/MS Neg	892	6068	297.28	12591	646-30-0	C16535	HMDB00772	0.6962	1.1681	0.8781	0.9995	1.2074	1.1415	0.995	0.9396	0.9007	1.2628	0.7914	1.0977	1.062	0.832	0.7742	1.1111	0.9377	1.5479	0.9814	1.2313	1.1762	1.5783	0.9126	0.8446	1.0005	1.2107	1.4629
1345	stearate (18:0)	Lipid	Long Chain Saturated Fatty Acid	1358	LC/MS Neg	439	5872	283.264	5281	57-11-4	C01530	HMDB00827	0.7194	1.2429	0.8294	0.9123	1.4153	1.1458	0.8918	0.9762	0.8139	1.3709	0.7713	0.8766	1.0299	0.7613	0.7657	1.1073	0.8734	1.4233	0.8694	1.2239	1.1357	1.4396	0.9399	0.827	1.1424	1.1181	1.4743
1342	pentadecanoate (15:0)	Lipid	Long Chain Saturated Fatty Acid	1361	LC/MS Neg	980	5521	241.217	13849	1002-84-2;10002-84-2	C16537	HMDB00826	0.6447	0.9614	0.5832	0.786	1.1493	1.4362	0.9774	0.9923	0.7617	1.1455	0.6985	0.9321	1.4496	0.8496	0.7075	1.0839	0.8425	2.1818	0.8663	1.3292	1.196	2.7649	1.0306	1.0077	1.2345	1.2231	1.5385
1341	myristate (14:0)	Lipid	Long Chain Saturated Fatty Acid	1365	LC/MS Neg	519	5440	227.202	11005	544-63-8	C06424	HMDB00806	0.44	0.9072	0.4555	0.5463	1.1266	1.9333	1.0221	1.0135	0.6787	1.2491	0.8632	0.7525	1.86	0.6327	0.6432	1.086	0.6919	2.4798	0.7211	1.5821	1.2959	3.1467	0.9865	0.9357	1.208	1.1888	1.8876
3853	2'-deoxyuridine	Nucleotide	Pyrimidine Metabolism, Uracil containing	1412	LC/MS Polar	536	1100	273.073	13712	951-78-0	C00526	HMDB00012	0.7154	1.0977	1.1656	0.8603	1.3077	0.6142	1.1822	0.7874	0.7823	0.9807	0.9732	0.8277	1.5234	0.8386	0.6082	1.0193	0.9564	1.1915	1.043	1.5561	0.6906	1.3354	1.0592	1.1172	1.2581	0.7671	1.1015
1087	3-phosphoglycerate	Carbohydrate	Glycolysis, Gluconeogenesis, and Pyruvate Metabolism	1414	LC/MS Pos Early	132	590	187	724	80731-10-8	C00597	HMDB00807	1.0862	1.2348	1.543	0.7765	1.5732	0.6407	1.0195	1.6405	0.835	0.8083	0.8133	0.6735	0.8602	0.6407	1.0887	0.6521	1.6084	0.7504	0.652	0.9873	1	0.7391	1.9248	1.8529	0.7939	5.2968	3.3731
244	kynurenate	Amino Acid	Tryptophan Metabolism	1417	LC/MS Neg	98	2224	188.035	3845	492-27-3	C01717	HMDB00715	1.9958	0.6519	0.9089	0.6011	1.0308	0.7391	1.3442	0.5828	1.5307	0.7179	0.9692	0.6399	1.3713	0.6942	0.8506	1.641	1.5747	1.2704	1.1623	1.3568	0.7256	0.8413	1.5511	1.4288	1.695	0.7161	0.6122
3893	5,6-dihydrothymine	Nucleotide	Pyrimidine Metabolism, Thymine containing	1418	LC/MS Neg	158	1637.8	127.051	93556	696-04-8	C00906	HMDB00079	1.0445	0.8	0.8495	1.2704	1.018	1.2532	0.9773	1.1402	0.8392	0.7318	1.2383	0.9497	1.5599	0.7333	0.7566	0.7532	0.9959	1.1381	1.0565	1.44	1.0041	1.7983	0.9538	1.0242	1.7816	1.1463	0.9945
480	5-methylthioadenosine (MTA)	Amino Acid	Polyamine Metabolism	1419	LC/MS Pos Early	212	2752	298.097	439176	2457-80-9	C00170	HMDB01173	1.1227	0.946	1.2129	0.8985	0.9267	0.9942	0.9585	1.1082	0.999	1.5382	1.8519	0.8461	1.5098	1.4312	1.221	0.8542	0.6521	1.1366	1.001	0.842	0.8972	1.1744	1.2881	1.2356	1.4876	0.7951	0.6962
146	2-hydroxyphenylacetate	Amino Acid	Phenylalanine Metabolism	1432	LC/MS Polar	235	858.6	151.04	11970	614-75-5	C05852	HMDB00669	1.2988	3.2272	1.1541	0.8036	0.9112	0.9469	1.3267	1.1581	1.9869	0.4738	1.3995	1.0202	1.2697	0.7117	0.8844	1.1294	1.8183	0.8903	0.9578	1.0529	0.626	0.9798	0.9572	0.841	1.2371	0.6214	0.7896
1292	succinate	Energy	TCA Cycle	1437	LC/MS Polar	252	3149	117.019	1110	110-15-6	C00042	HMDB00254	1.0275	1.0975	0.9989	1.2593	1.0265	1.0325	1.1367	1.0952	1.1511	0.7637	1.0881	0.8948	1.318	0.9338	0.9945	1.0011	0.9737	1.0812	0.9287	1.0515	0.8544	0.9715	0.8389	0.7822	0.7322	1.1033	0.8001
123	pipecolate	Amino Acid	Lysine Metabolism	1444	LC/MS Pos Early	1025	2200	130.086	849	4043-87-2	C00408	HMDB00070	1.2003	1.608	0.6214	0.4862	0.6396	0.5353	0.9081	1.5552	0.9809	2.0883	1.6052	1.2908	0.8615	0.6266	1.0761	1.4843	1.0191	1.0375	0.6741	2.152	0.8119	27.2974	0.7206	0.7	0.9063	0.7617	0.7584
418	ornithine	Amino Acid	Urea cycle; Arginine and Proline Metabolism	1493	LC/MS Pos Early	444	2800	133.097	6262	3184-13-2	C00077	HMDB03374	1.1903	0.8023	0.7413	0.9763	0.9027	0.7661	1.0041	0.9076	1.151	0.9175	0.7543	0.7733	1.1755	0.9127	1.0303	1.1222	0.9959	0.8629	1.1214	0.7375	1.0059	1.3067	1.3439	1.363	1.3299	1.0162	0.7722
499	5-oxoproline	Amino Acid	Glutathione Metabolism	1494	LC/MS Neg	1021	738.5	128.035	7405	98-79-3	C01879	HMDB00267	1.1071	1.0285	0.9714	0.8666	0.8212	0.9768	1.0699	0.9664	1.1668	0.5941	0.7961	1.2016	1.245	1.0215	1.0685	0.9987	0.8436	1.0246	0.9173	0.8419	0.8904	1.0646	1.1184	0.9471	1.0582	1.0013	0.7516
1598	methylmalonate (MMA)	Lipid	Fatty Acid Metabolism (also BCAA Metabolism)	1496	LC/MS Polar	418	3078.4	117.019	487	516-05-2	C02170	HMDB00202	0.5593	1.7619	0.9286	1.4021	0.6391	0.4361	0.6946	1.4425	2.3489	0.6746	1.4433	0.3235	1.2271	1.4806	0.9485	0.4574	1.1911	0.567	1.3467	0.9087	0.7201	2.2333	5.4352	5.4704	0.461	1.2383	0.5633
109	N6,N6,N6-trimethyllysine	Amino Acid	Lysine Metabolism	1498	LC/MS Pos Early	189	2825	189.16	440120	23284-33-5	C03793	HMDB01325	1.7581	0.3543	0.6714	0.8829	1.069	0.7981	1.0378	0.5303	0.7631	1.2876	0.9615	0.7449	1.4589	0.9622	0.6558	1.1994	1.2944	0.959	1.2675	1.3757	0.8452	0.9583	1.792	1.7233	1.4941	1.1167	1.1577
3825	orotate	Nucleotide	Pyrimidine Metabolism, Orotate containing	1505	LC/MS Polar	445	1638.1	155.01	967	50887-69-9	C00295	HMDB00226	1.6452	0.7751	1.5118	0.7755	1.1224	0.8161	1.0233	1.5291	3.1839	0.5549	0.8394	0.8619	1.1536	0.5076	0.6614	1.1624	0.9767	0.7546	1.0568	0.9365	0.8591	1.4353	1.3661	1.3254	0.6561	0.8606	0.6211
3945	pantothenate (Vitamin B5)	Cofactors and Vitamins	Pantothenate and CoA Metabolism	1508	LC/MS Neg	1024	1498.7	218.103	6613	137-08-6	C00864	HMDB00210	0.6599	1.265	1.102	1.1532	0.9648	1.0939	1.866	0.8257	1.2485	1.4477	1.3271	0.8054	1.2225	0.7512	4.1835	0.6683	0.7652	1.2607	0.9261	0.9847	0.6783	1.1938	0.7936	1.0634	1.3092	0.5696	0.9241
254	picolinate	Amino Acid	Tryptophan Metabolism	1512	LC/MS Pos Early	1022	910	124.039	1018	98-98-6	C10164	HMDB02243	1.5517	1.227	1.1907	0.6373	0.4688	0.5737	1.0534	0.4688	1.3188	0.9539	1.875	1.1255	1.19	0.7053	0.6229	0.5411	1.4137	0.7749	0.8839	0.7172	0.9813	0.6515	1.009	0.7506	1.0926	0.4752	1.3426
5142	salicylate	Xenobiotics	Drug - Topical Agents	1515	LC/MS Polar	501	802	137.024	338	69-72-7	C00805	HMDB01895	1.1746	1.0627	3.2629	1.3842	2.2917	0.8474	0.531	1.3364	2.695	0.6596	1.7324	1.1907	0.4953	1.3427	13.7814	0.8354	0.622	0.7592	3.0787	0.7178	0.4747	0.9373	0.8623	0.8358	0.8017	0.6971	1.8183
4	sarcosine	Amino Acid	Glycine, Serine and Threonine Metabolism	1516	LC/MS Pos Early	1023	1280	90.055	1088	107-97-1	C00213	HMDB00271	1.4601	0.6997	0.8073	0.7879	0.8535	0.7487	0.7733	0.7475	0.8286	1.1149	0.8157	1.1388	0.9722	1.3044	1.0701	1.1615	1.2236	1.5626	1.147	1.0278	1.1267	1.3064	0.6565	0.6516	1.2429	0.845	1.8109
1172	sucrose	Carbohydrate	Disaccharides and Oligosaccharides	1519	LC/MS Neg	935	865	341.109	5988	57-50-1	C00089	HMDB00258	2.8916	1.333	3.058	5.3843	1.1693	0.0908	0.9173	1.1557	1.04	0.7381	1.1712	0.1626	1.5961	0.0824	0.1757	0.6579	0.1335	0.96	0.0824	0.0824	0.1472	0.8943	5.3856	5.4983	0.0824	1.575	0.2417
365	3-hydroxyisobutyrate	Amino Acid	Leucine, Isoleucine and Valine Metabolism	1549	LC/MS Polar	111	1619	103.04	87	2068-83-9	C06001	HMDB00336	2.1461	3.8171	0.9084	1.0762	2.1209	1.7342	0.8614	1.5056	1.6503	2.6409	1.298	0.8395	1.3719	0.7504	0.8586	0.9307	1.0132	0.6882	0.9486	0.9868	0.8265	0.5281	0.8851	0.8545	1.4586	0.8054	1.3031
1374	erucate (22:1n9)	Lipid	Long Chain Monounsaturated Fatty Acid	1552	LC/MS Neg	1087	6355.6	337.311	5281116	112-86-7	C08316	HMDB02068	2.6276	2.291	1.5624	0.8687	1.6046	0.9995	1.0222	1.0005	0.6721	3.1964	0.52	0.9811	0.9651	0.5345	2.5066	0.9417	1.3169	1.9746	0.5892	0.9912	0.9593	1.2481	0.8611	0.8086	1.1863	1.4094	1.3811
484	4-acetamidobutanoate	Amino Acid	Polyamine Metabolism	1558	LC/MS Polar	1113	1925	144.067	18189	3025-96-5	C02946	HMDB03681	0.8522	0.6812	0.8281	0.7965	0.6675	0.6063	0.8915	1.0945	0.9647	0.6473	0.9847	0.83	1.9631	1.451	1.604	0.7818	0.7487	1.2687	1.0184	1.0153	0.7067	1.785	1.0969	1.1239	1.0248	1.0258	0.8721
3968	alpha-tocopherol	Cofactors and Vitamins	Tocopherol Metabolism	1561	LC/MS Pos Late	1105	2522	430.378	14985	59-02-9;10191-41-0	C02477	HMDB01893	1.0339	0.9521	1.0062	0.8353	1.0969	0.6276	0.8943	1.1216	1.0169	1.6563	0.8289	0.9622	0.8419	0.9317	0.9938	1.338	1.239	1.1321	0.9403	1.1045	1.1745	1.4105	0.9763	0.9816	1.2682	1.3233	0.9849
3090	chenodeoxycholate	Lipid	Primary Bile Acid Metabolism	1563	LC/MS Neg	1123	5264	391.285	10133	474-24-9;474-25-9	C02528	HMDB00518	1.5996	0.898	1.1748	1.0154	1	0.0901	1.236	0.9119	0.5457	0.7185	0.0901	1.1455	0.8354	2.3313	3.6744	0.7226	0.666	0.4046	0.0901	0.0901	0.5599	0.0901	7.7548	7.4812	2.0338	1.5895	1.295
1283	citrate	Energy	TCA Cycle	1564	LC/MS Neg	1124	582	191.02	311	77-92-9	C00158	HMDB00094	1.0337	1.4415	0.9409	1.2762	1.2867	0.9252	0.9178	1.1514	1.1401	0.786	0.774	0.84	1.2808	0.9379	1.0136	0.9864	0.9441	1.3382	1.0254	0.7464	0.8159	1.0261	1.0251	0.9818	1.0819	0.9631	1.128
3895	3-aminoisobutyrate	Nucleotide	Pyrimidine Metabolism, Thymine containing	1566	LC/MS Pos Early	1114	2190	104.071	64956	10569-72-9;214139-20-5	C05145	HMDB03911	0.6242	0.2012	0.2883	0.6381	1.2457	1.6328	1.002	1.2659	0.5098	0.5411	0.998	1.7007	1.4118	0.5228	1.2003	0.2389	1.6873	1.086	2.1384	0.8367	0.658	1.0049	1.1899	1.1793	1.2937	0.5521	1.1868
184	vanillylmandelate (VMA)	Amino Acid	Tyrosine Metabolism	1567	LC/MS Neg	1111	941	197.046	1245	55-10-7	C05584	HMDB00291	0.5452	0.608	1.1343	1.0155	0.7291	0.7453	1.3714	1.0832	1.2024	0.5452	0.9491	0.5452	1.9619	0.9153	1.0542	0.9245	0.9069	1.9884	0.9845	1.0721	0.5534	0.927	1.614	1.3058	0.8821	1.1321	0.7695
1093	glycerate	Carbohydrate	Glycolysis, Gluconeogenesis, and Pyruvate Metabolism	1572	LC/MS Polar	1052	2070.4	105.019	752	600-19-1	C00258	HMDB00139	0.9493	0.8414	1.2043	1.2087	0.832	0.9891	1.3151	1.2184	1.1383	1.1669	1.2528	0.8153	0.7382	0.644	1.4925	0.9017	1.0109	0.7752	0.5953	0.4805	1.2348	1.1381	0.9433	0.951	1.0115	0.8803	0.6949
4462	methyl indole-3-acetate	Xenobiotics	Food Component/Plant	1584	LC/MS Pos Early	1104	3380	190.086	74706	1912-33-0		HMDB29738	0.7638	1.7309	0.613	1.342	0.5835	2.634	0.6429	2.3011	1.3292	0.7533	0.8316	0.929	0.7438	0.5835	1.0105	1.4512	9.3801	0.9151	4.0281	0.9895	0.9562	0.6849	0.9514	0.9093	1.9636	4.7484	0.5835
30	N-acetylalanine	Amino Acid	Alanine and Aspartate Metabolism	1585	LC/MS Polar	1110	1564.8	130.051	88064	97-69-8	C02847	HMDB00766	1.2169	0.9274	1.2956	1.0725	0.8402	0.9515	1.0047	1.1102	1.0473	0.9266	0.9184	0.8776	1.3488	0.9953	0.9729	0.974	0.8417	1.3076	1.5863	1.1734	0.9264	1.3108	1.0831	1.0773	1.1861	0.9907	0.9666
290	N-acetylleucine	Amino Acid	Leucine, Isoleucine and Valine Metabolism	1587	LC/MS Neg	1082	2400	172.098	70912	1188-21-2	C02710	HMDB11756	0.6459	1.2658	1.5347	0.6459	0.9066	0.8217	0.8385	0.6459	1.3365	2.4545	1.1699	0.6459	0.6459	1.009	0.991	0.6459	0.7026	0.6459	0.7667	0.7705	0.6459	1.7852	0.8442	1.1045	1.2111	0.9788	1.2446
372	N-acetylmethionine	Amino Acid	Methionine, Cysteine, SAM and Taurine Metabolism	1589	LC/MS Neg	1083	1787	190.054	448580	65-82-7	C02712	HMDB11745	1.1106	1.0164	1.8059	0.9502	0.8781	0.8961	1.0147	1.0454	1.1756	1.138	1.1276	0.9079	1.3648	0.627	0.7378	0.8706	0.8045	1.2212	2.1173	0.9853	0.7385	1.2467	1.2481	1.2346	0.9302	1.0159	0.9133
355	N-acetylvaline	Amino Acid	Leucine, Isoleucine and Valine Metabolism	1591	LC/MS Neg	1084	1704	158.082	66789	96-81-1		HMDB11757	0.8328	0.9403	1.2116	0.9264	0.6604	1.0627	1.0043	0.8318	1.1731	1.2937	0.8188	0.6894	1.1286	1.3494	0.8858	1.0074	0.9107	1.1819	1.3056	0.6323	1.0783	1.2582	1.0762	0.9743	0.9957	0.8397	0.799
3823	N-carbamoylaspartate	Nucleotide	Pyrimidine Metabolism, Orotate containing	1594	LC/MS Polar	1108	3800	175.036	93072	923-37-5	C00438	HMDB00828	0.203	1.2515	2.296	0.203	0.203	1.263	0.7685	1.3153	3.3077	1.176	0.6236	0.6405	1	0.203	0.203	0.4695	0.6779	0.203	0.203	0.203	0.9951	0.203	2.8119	0.203	0.203	0.203	0.203
1980	phosphoethanolamine (PE)	Lipid	Phospholipid Metabolism	1600	LC/MS Pos Early	1026	700	142.026	1015	1071-23-4	C00346	HMDB00224	1.2051	0.9989	0.9322	0.9994	0.7183	0.782	1.2869	1.2509	1.2236	0.6489	1.0855	1.1321	0.9543	0.6046	0.6039	0.8185	1.0679	0.9209	0.8689	0.9211	1.0006	0.9774	1.7995	1.8074	0.7345	1.5493	1.5749
3753	urate	Nucleotide	Purine Metabolism, (Hypo)Xanthine/Inosine containing	1604	LC/MS Neg	1134	757.1	167.021	1175	69-93-2;120K5305	C00366	HMDB00289	1.3846	1.3595	0.8867	1.0752	0.6757	1.0567	0.6545	1.1664	1.1985	1.4491	1.0197	0.9397	1.2404	0.8982	1.1149	0.8634	0.7002	0.8312	0.9803	0.9682	0.9274	1.4159	1.1649	1.0876	1.586	0.752	0.681
3133	ursodeoxycholate	Lipid	Secondary Bile Acid Metabolism	1605	LC/MS Neg	1135	5055	391.285	31401	128-13-2	C07880	HMDB00946	1.7753	0.0838	1.0576	1.5295	0.4778	0.3587	1.4079	0.3753	1.1109	0.2346	0.1579	1.3341	0.459	2.7694	3.089	1.0188	1	0.2188	0.6699	0.5503	1.7962	0.2824	24.8594	24.9331	1.1374	2.103	0.8111
414	arginine	Amino Acid	Urea cycle; Arginine and Proline Metabolism	1638	LC/MS Pos Early	231	2825	175.119	232	1119-34-2	C00062	HMDB00517	0.9848	0.5408	0.8322	1.0951	0.7695	0.9038	1.2095	0.6514	1.3605	0.8806	1.0152	0.8267	1.2535	1.0561	0.8687	1.3291	0.8786	1.2273	1.1798	0.9595	1.3133	0.9044	0.9015	0.9252	1.6099	1.1493	1.0176
1332	caprate (10:0)	Lipid	Medium Chain Fatty Acid	1642	LC/MS Neg	888	5090.7	171.139	2969	334-48-5	C01571	HMDB00511	0.7321	0.8788	0.7671	0.6751	1.4339	0.832	1.6589	1.645	2.6681	2.4217	0.7106	0.4623	1.3356	0.7118	0.9181	0.7073	0.793	1.1047	0.8226	1.166	0.6668	1.5067	1.1119	1.2387	0.5747	0.5524	1.0819
1293	fumarate	Energy	TCA Cycle	1643	LC/MS Polar	330	3084	115.004	444972	100-17-8	C00122	HMDB00134	1.0125	2.785	0.8512	1.1712	1.2467	1.4854	1.0538	1.7314	1.0364	0.753	0.954	0.6614	1.5795	0.8952	1.2393	0.9953	0.8402	1.157	0.8831	0.8835	1.0357	1.2998	0.9613	0.9323	1.0047	0.9435	0.7271
1329	heptanoate (7:0)	Lipid	Medium Chain Fatty Acid	1644	LC/MS Neg	925	3670	129.092	8094	111-14-8	C17714	HMDB00666	1.0574	3.6705	0.9425	1.5361	0.9717	1.004	0.8291	4.3951	1.5076	1.4312	0.9004	0.9927	0.9025	0.9	0.9744	2.287	1.6256	1.2506	1.4251	0.7964	0.5988	0.8539	0.8992	0.996	1.4729	0.7321	0.7022
1337	laurate (12:0)	Lipid	Medium Chain Fatty Acid	1645	LC/MS Neg	181	5300	199.17	3893	143-07-7	C02679	HMDB00638	0.4249	0.7963	0.474	0.549	1.014	1.3227	1.1059	1.2502	0.7408	1.0268	1.9809	0.5602	2.1832	0.4384	0.9611	0.9448	0.689	1.6506	0.8037	1.4946	1.3131	2.0775	1.2387	1.2425	0.7963	0.986	1.7776
9	serine	Amino Acid	Glycine, Serine and Threonine Metabolism	1648	LC/MS Pos Early	503	1239	106.05	5951	56-45-1	C00065	HMDB00187	0.9838	0.9022	0.6104	1.2115	1.018	1.3318	1.023	1.1804	1.0384	0.7926	0.628	0.9832	0.9978	1.1745	1.064	1.1348	0.8825	0.8071	1.242	1.0195	1.2476	0.913	0.8438	0.8357	1.1288	1.0635	0.9653
354	valine	Amino Acid	Leucine, Isoleucine and Valine Metabolism	1649	LC/MS Pos Early	566	2479	118.086	6287	72-18-4	C00183	HMDB00883	1.3977	1.0077	0.9235	0.7409	1.0302	0.814	0.7917	1.0965	1.0565	1.6666	1.1199	0.8187	0.822	1.4271	1.1513	1.0035	0.9634	0.7466	0.9835	0.6916	1.1491	0.8947	1.0083	0.9965	1.3293	1.1048	0.6797
4052	pyridoxal	Cofactors and Vitamins	Vitamin B6 Metabolism	1651	LC/MS Pos Early	491	2343	168.065	1050	65-22-5	C00250	HMDB01545	1.0464	1.0448	0.9815	1.0583	0.9902	0.9874	0.8851	0.9391	0.9834	1.0098	1.0137	0.963	0.894	1.0669	2.1644	0.8656	0.9374	1.1031	0.9241	1.1483	0.8734	0.8676	1.1289	0.9579	1.0181	1.0441	0.9392
163	4-hydroxyphenylpyruvate	Amino Acid	Tyrosine Metabolism	1669	LC/MS Neg	1141	1690	179.035	979	156-39-8	C01179	HMDB00707	1.4178	0.6741	1.1016	0.8681	0.818	0.7827	0.8322	1.5164	1.4152	1.1073	1.2062	0.5671	1.0367	0.5569	1.0843	0.7053	0.8406	1.0925	0.5944	0.7155	0.9156	0.9768	1.0232	1.4474	1.1675	0.821	0.7939
416	urea	Amino Acid	Urea cycle; Arginine and Proline Metabolism	1670	LC/MS Pos Early	533	700	121.072	1176	57-13-6	C00086	HMDB00294	1.3712	1.4796	0.798	0.9786	0.9531	0.9794	1.4943	0.9633	0.8765	0.8915	1.0206	0.8148	1.2399	0.774	0.8281	0.8486	1.1565	1.124	0.8109	1.218	0.94	1.0782	1.4258	1.3434	1.3458	0.8985	1.435
2987	cortisol	Lipid	Corticosteroids	1712	LC/MS Neg	356	4710	361.202	5754	50-23-7	C00735	HMDB00063	0.8438	1.0967	1.0079	0.6321	1.3444	1.4523	0.8339	0.9921	1.1338	0.4358	0.8234	2.7995	1.6628	1.2269	1.9197	0.6886	1.3898	0.8008	0.6101	0.6923	0.4923	1.085	2.0786	2.1636	0.5434	0.8313	1.6273
2990	cortisone	Lipid	Corticosteroids	1769	LC/MS Neg	273	4575	359.186	222786	53-06-5	C00762	HMDB02802	1.3549	0.8956	1.1084	0.8691	1.2997	2.4233	0.8776	1.0829	0.9147	0.6949	0.716	1.1895	1.1737	0.9645	0.9047	1.3964	1.7577	0.8235	0.8276	0.746	0.8174	0.7712	1.3453	1.475	1.1803	0.8536	1.8317
4033	retinol (Vitamin A)	Cofactors and Vitamins	Vitamin A Metabolism	1806	LC/MS Pos Late	498	1636	269.226	445354	68-26-8	C00473	HMDB00305	1.1906	1.2822	1.116	0.9498	0.9712	0.9001	0.8853	0.8713	1.2377	1.42	1.3811	1.0019	0.9733	1.1202	1.0001	0.8967	0.9966	0.9383	0.7017	0.7755	1.4168	1.1898	0.9173	0.8198	1.3236	1.1767	0.7712
3941	riboflavin (Vitamin B2)	Cofactors and Vitamins	Riboflavin Metabolism	1827	LC/MS Neg	500	3160	255.089	493570	83-88-5	C00255	HMDB00244	8.4302	0.6997	4.2582	1.2007	0.6997	3.6462	0.7895	0.6997	0.6997	0.9018	1.6109	0.761	8.8486	0.6997	1.5045	0.6997	0.8039	1	0.6997	1.1786	0.6997	0.9961	0.6997	0.6997	0.6997	0.6997	0.9035
391	cysteine	Amino Acid	Methionine, Cysteine, SAM and Taurine Metabolism	1868	LC/MS Pos Early	800	1475	122.027	5862	52-90-4;56-89-3	C00097	HMDB00574	1.275	1.165	0.9355	0.8733	0.8118	1.0987	1.0333	1.225	0.8649	1.0455	0.9347	0.7759	1.3987	1.4735	1.0942	1.0929	0.6654	1.0786	0.8018	0.9664	0.7377	1.0217	0.9783	1.0453	1.0229	0.6958	0.9651
426	proline	Amino Acid	Urea cycle; Arginine and Proline Metabolism	1898	LC/MS Pos Early	480	1603	116.071	145742	147-85-3	C00148	HMDB00162	1.4142	1.6327	1.0206	0.9483	0.9226	0.7568	0.996	2.006	1.3692	1.2617	0.8798	0.5963	1.1788	1.2015	1.4981	0.9026	0.8949	0.8592	0.8526	0.9378	0.8785	1.506	1.0725	1.004	0.9849	0.7885	0.9281
3912	quinolinate	Cofactors and Vitamins	Nicotinate and Nicotinamide Metabolism	1899	LC/MS Pos Early	182	845	168.029	1066	89-00-9	C03722	HMDB00232	1.0665	0.6428	1.042	0.9508	0.5003	0.7349	0.9236	1.3747	1.483	0.7569	1.3404	1.0303	2.1799	0.8111	0.7071	0.8815	1.2756	1.1006	0.8528	1.8757	0.8182	2.7194	1.7864	1.8209	1.4611	0.9142	0.858
406	taurine	Amino Acid	Methionine, Cysteine, SAM and Taurine Metabolism	2125	LC/MS Pos Early	512	660	126.022	1123	107-35-7	C00245	HMDB00251	0.8247	0.5579	1.2859	0.9575	0.5563	0.83	1.4548	0.8269	1.1062	0.6139	0.9669	0.9752	0.9247	0.7078	0.7	1.0248	1.2139	0.9245	1.089	0.9363	1.0421	0.8994	1.5121	1.3737	1.1254	1.2923	1.1248
423	citrulline	Amino Acid	Urea cycle; Arginine and Proline Metabolism	2132	LC/MS Pos Early	391	1520	176.103	9750	372-75-8	C00327	HMDB00904	1.0514	0.4409	1.0816	0.8103	0.9388	0.8447	1.1018	0.4913	1.087	0.9545	1.0259	0.7598	1.5272	0.8805	0.7211	1.2781	0.8157	0.9879	1.2935	0.9104	0.9972	1.1316	1.345	1.2551	1.1273	1.0051	1.0028
4016	biliverdin	Cofactors and Vitamins	Hemoglobin and Porphyrin Metabolism	2137	LC/MS Pos Late	250	1016	583.255	5353439	55482-27-4;55482-27-4	C00500	HMDB01008	1.3803	2.2398	2.0193	1.2341	1.0636	0.8488	0.9712	0.5102	0.7901	0.498	0.3822	1.3399	2.2214	1.9965	0.8649	0.8403	0.8981	0.939	1.4057	1.3468	1.0288	1.6378	0.9337	0.8415	1.399	2.1221	2.3881
259	serotonin	Amino Acid	Tryptophan Metabolism	2342	LC/MS Pos Early	504	2550	177.102	5202	153-98-0	C00780	HMDB00259	0.5058	1.227	0.508	1.0124	0.6977	0.8435	2.3828	0.9835	1.1118	1.1741	0.8593	1.2325	0.9687	0.6768	0.2297	0.9959	1.345	0.6059	0.7593	1.0041	0.9491	1.2704	2.7943	2.7853	0.4502	1.5663	1.4968
551	gamma-glutamylglutamine	Peptide	Gamma-glutamyl Amino Acid	2730	LC/MS Pos Early	1140	1430	276.119	150914	10148-81-9	C05283	HMDB11738	0.9406	0.7312	0.971	1.0051	0.7881	0.8455	1.2497	1.1405	1.1744	0.6821	0.7834	1.1296	1.4016	1.2017	0.9018	1.1083	0.9298	0.9448	1.0146	0.7687	1.0398	1.1088	0.9949	0.9144	1.2564	1.2259	0.9172
562	gamma-glutamyltyrosine	Peptide	Gamma-glutamyl Amino Acid	2734	LC/MS Pos Early	1102	2518	311.124	94340	7432-23-7		HMDB11741	0.9425	0.5151	1.3959	1.1326	0.9543	0.8174	1.2872	1.2544	0.6289	0.993	0.7399	0.4736	1.5939	0.833	1.3857	0.4284	0.8156	1.3821	0.3863	0.4292	1.0905	1.007	1.5163	1.5077	1.6944	0.9159	0.3651
224	thyroxine	Amino Acid	Tyrosine Metabolism	2761	LC/MS Neg	1094	4808	775.679	5819	51-48-9	C01829	HMDB01918	0.9634	1.0309	0.8146	0.9433	1.1916	0.9455	0.9426	1.1684	0.8856	0.714	1.2376	1.4704	0.9062	1.0702	1.0105	1.3162	1.1822	0.8259	1.0362	0.9816	0.9895	1.0647	1.1489	1.0152	0.937	1.0679	1.0624
373	N-formylmethionine	Amino Acid	Methionine, Cysteine, SAM and Taurine Metabolism	2829	LC/MS Neg	194	1543.8	176.039	439750	4289-98-9	C03145	HMDB01015	1.1911	1.15	1.5624	0.8815	0.7467	0.7839	0.988	1.0411	1.2202	0.8587	0.8865	0.7976	1.4599	1.012	1.0164	0.8481	0.751	1.2623	1.3445	0.9273	0.7033	1.3026	1.0974	1.151	1.1156	0.845	0.9021
3764	adenosine 3',5'-cyclic monophosphate (cAMP)	Nucleotide	Purine Metabolism, Adenine containing	2831	LC/MS Neg	207	1952.2	328.045	6076	60-92-4	C00575	HMDB00058	1.1611	0.9795	0.6844	0.6844	0.6844	0.6844	0.6844	0.9521	0.6844	0.6844	0.6844	1.0205	1.0888	1.3472	0.9053	1.7092	0.8904	0.6844	0.6844	0.9629	0.9349	1.4594	0.6844	0.6844	1.03	0.6844	0.9444
3744	hypoxanthine	Nucleotide	Purine Metabolism, (Hypo)Xanthine/Inosine containing	3127	LC/MS Neg	171	1291.2	135.031	790	68-94-0	C00262	HMDB00157	0.998	1.2665	0.8506	0.9493	0.8541	1.7262	0.991	0.7083	1.002	1.0788	0.6461	1.0376	1.7936	0.7798	0.4001	0.8856	1.1235	1.1347	0.7823	1.2603	0.8918	1.4619	1.6898	1.5215	2.6961	1.0452	1.8065
6	betaine	Amino Acid	Glycine, Serine and Threonine Metabolism	3141	LC/MS Pos Early	799	1064	118.086	247	107-43-7	C00719	HMDB00043	0.9499	1.2561	0.7431	1.1905	0.98	0.828	1.356	1.0255	1.502	0.8315	0.8586	0.6846	1.5953	0.9102	1.0701	0.9833	0.8277	1.0034	1.2258	0.9262	0.9405	0.8545	1.0677	1.0179	0.9966	1.1954	1.1573
3745	xanthine	Nucleotide	Purine Metabolism, (Hypo)Xanthine/Inosine containing	3147	LC/MS Polar	1004	2023	151.026	1188	69-89-6	C00385	HMDB00292	0.7827	0.8568	0.7352	0.8092	0.8178	1.3525	1.1286	0.7606	0.804	0.6593	0.6033	1.1627	1.4231	1.1178	0.4233	1.0185	1.1232	1.6235	1.1651	1.9511	1.0477	1.3772	1.0333	0.998	1.6318	0.9907	1.002
3856	3-ureidopropionate	Nucleotide	Pyrimidine Metabolism, Uracil containing	3155	LC/MS Polar	1053	2230	131.046	111	462-88-4	C02642	HMDB00026	1.1535	2.0271	0.8227	1.2828	0.971	0.9761	1.2448	1.2821	1.4878	0.6777	1.3777	0.8394	1.4088	0.6777	0.8752	1.4347	0.7428	0.9942	1.5979	0.8956	1.2021	1.0176	0.8461	0.8835	1.3414	0.9465	0.891
390	alpha-ketobutyrate	Amino Acid	Methionine, Cysteine, SAM and Taurine Metabolism	4968	LC/MS Polar	796	940	101.024	58	600-18-0	C00109	HMDB00005	0.9069	2.0241	0.4004	1.0047	2.1609	1.4391	0.6522	1.4138	0.503	6.9554	1.0043	0.9957	0.7704	0.6889	1.0659	0.6571	0.8044	1.223	0.5769	1.2456	1.1633	0.9829	1.0571	0.9698	1.4076	0.6668	1.1935
5	dimethylglycine	Amino Acid	Glycine, Serine and Threonine Metabolism	5086	LC/MS Pos Early	806	1104	104.071	673	1118-68-9	C01026	HMDB00092	0.8097	0.8111	1.0144	0.828	1.8359	1.1427	0.8384	0.9885	0.7283	1.1218	1.3415	0.952	1.5108	1.1242	2.393	1.0115	0.9624	0.8952	1.2081	1.7904	0.8281	0.9767	1.2691	1.2596	2.1478	1.1107	0.7226
2981	corticosterone	Lipid	Corticosteroids	5983	LC/MS Neg	272	5040	345.207	5753	50-22-6	C02140	HMDB01547	1.0198	0.9827	0.7811	0.469	0.469	2.3919	0.8898	0.469	0.469	0.469	0.469	1.8226	2.6604	0.8898	5.1652	0.469	1.0173	0.469	0.469	0.4804	0.469	0.8209	3.8052	4.0662	0.469	0.5504	4.9913
115	2-aminoadipate	Amino Acid	Lysine Metabolism	6146	LC/MS Polar	381	3500	160.061	469	542-32-5;1118-90-7	C00956	HMDB00510	1.0205	1.0253	1.0805	0.7839	1.3496	1.0046	0.8169	1.1011	0.9527	2.5631	1.3925	0.9213	0.9954	1.2885	1.0909	1.1048	0.7112	0.685	0.7383	0.8604	1.014	0.9133	0.8129	0.5717	1.7507	1.0401	0.6117
186	3-methoxytyrosine	Amino Acid	Tyrosine Metabolism	12017	LC/MS Pos Early	1342	2555	212.092	1670	300-48-1		HMDB01434	0.9612	0.3105	1.1532	1.1571	0.6036	1.1793	1.6346	0.9543	0.9943	0.6312	0.7779	1.231	1.7335	0.8985	1.1764	0.6379	0.9477	1.37	1.7488	0.8706	1.1145	1.8055	1.145	0.9675	0.7062	1.0705	0.9961
4768	4-acetamidophenol	Xenobiotics	Drug - Analgesics, Anesthetics	12032	LC/MS Neg	1383	2173.7	150.056	1983	103-90-2	C06804	HMDB01859	0.1097	0.1097	0.1097	0.1097	1	0.1097	0.1097	0.1097	0.1097	0.1097	0.6121	0.1097	0.1097	0.1097	0.1097	0.1097	0.1097	0.1097	0.1097	0.1097	7	0.1097	0.1097	0.1097	0.1097	0.1097	0.1097
1331	pelargonate (9:0)	Lipid	Medium Chain Fatty Acid	12035	LC/MS Neg	437	4798	157.123	8158	112-05-0	C01601	HMDB00847	1.1222	1.0703	0.9806	1.0308	0.9878	1.0022	1.0406	0.9919	1.5082	0.9904	1.2764	0.8217	0.9337	1.9062	1.0256	0.967	0.9006	0.8164	1.768	1.0935	0.8849	0.8864	0.9978	1.1217	0.8697	0.9573	1.8087
1287	isocitrate	Energy	TCA Cycle	12110	LC/MS Pos Early	1206	773	210.061	1198	20226-99-7	C00311	HMDB00193	0.9707	1.2453	1.249	0.9048	0.3601	1.1989	0.8178	2.8483	1.0925	0.3601	1.5504	0.6659	1.9034	0.9808	1.3286	0.6222	0.637	1.2339	0.4109	0.3601	0.4839	1.1722	1.2752	1.1062	0.799	0.993	1.007
313	beta-hydroxyisovalerate	Amino Acid	Leucine, Isoleucine and Valine Metabolism	12129	LC/MS Neg	1442	1027	117.056	69362	625-08-1		HMDB00754	1.1964	1.7202	1.1695	0.372	1.2826	0.5054	0.4891	1.1656	0.9187	2.0457	1.1942	0.7236	0.7888	0.8824	1.0215	0.941	1.5097	0.519	0.8463	1.1091	1.3453	1.7996	1.731	1.5774	0.9595	0.3526	1.003
3119	taurodeoxycholate	Lipid	Secondary Bile Acid Metabolism	12261	LC/MS Neg	1668	5257.4	498.289	2733768	207737-97-1	C05463	HMDB00896	1.3329	0.8629	5.3192	1.516	0.6786	0.3985	1.8694	2.6262	1.8139	0.618	7.783	1.6749	1.3043	1.0864	0.0645	1.1106	2.4383	0.6284	0.9136	0.0645	0.1011	0.578	0.4512	0.5917	0.1204	0.0645	0.421
2543	glycerol	Lipid	Glycerolipid Metabolism	15122	LC/MS Neg	1254	758	91.0401	753	56-81-5	C00116	HMDB00131	0.6996	1.3237	0.5914	0.5534	0.832	2.2886	0.7499	0.9724	0.5838	1.2863	1.1367	0.6225	1.3491	0.807	1.0276	0.8349	0.4882	1.9657	0.5026	1.3019	0.8366	2.4966	1.2546	1.2599	1.4875	1.0649	1.1179
240	kynurenine	Amino Acid	Tryptophan Metabolism	15140	LC/MS Pos Early	100000265	2739	209.092	161166	2922-83-0	C00328	HMDB00684	1.1041	0.6831	0.9892	0.8984	1.0108	0.8049	0.8966	1.0932	1.0652	0.7496	0.966	0.9712	1.3254	0.8261	1.0603	0.8229	1.1304	1.1352	0.9058	0.8507	1.0427	1.0701	1.2477	1.2546	1.1038	0.842	0.7533
18	allo-threonine	Amino Acid	Glycine, Serine and Threonine Metabolism	15142	LC/MS Polar	100000272	2511.1	118.051	99289	28954-12-3	C05519	HMDB04041	1.7487	0.7419	0.4938	0.9441	0.4938	0.5953	0.9982	1.0045	2.7518	0.4938	0.5115	0.6881	2.3047	0.4938	2.6826	0.6461	1.9851	0.738	1.0018	0.5653	0.4938	0.4938	2.581	2.2717	0.9913	0.4938	2.2171
1251	glucuronate	Carbohydrate	Aminosugar Metabolism	15443	LC/MS Polar	100000257	3233.3	193.035	444791	207300-70-7	C00191	HMDB00127	0.9463	0.7663	1.1338	0.8145	1.0398	0.6808	0.9555	0.8505	1.0174	1.2662	1.2027	0.9252	1.0985	1.8151	0.9826	1.0373	0.7174	1.0342	0.9602	0.8282	1.0825	0.9064	1.0391	1.0675	1.1061	1.0372	0.5485
1704	carnitine	Lipid	Carnitine Metabolism	15500	LC/MS Pos Early	100000007	1978	162.113	10917	461-05-2	C00318	HMDB00062	1.3115	0.8155	1.0037	1.331	1.0637	0.9963	0.9371	1.0426	0.9667	1.2037	0.917	0.8642	1.069	1.1998	1.0162	0.9716	1.0525	0.9614	0.9362	0.8712	0.8936	1.2025	1.0156	0.9605	1.4372	0.7947	1.0292
1974	choline	Lipid	Phospholipid Metabolism	15506	LC/MS Pos Early	1256	1961	104.107	305	67-48-1	C00114	HMDB00097	0.8533	0.9354	1.0026	0.9398	0.8679	0.8109	1.2358	1.3778	0.9244	1.3026	1.3136	0.9974	1.4786	0.8606	1.2824	1.151	0.666	1.2244	0.9134	1.0248	0.9007	1.1044	1.2732	1.2004	0.8857	1.1998	0.8458
1117	xylose	Carbohydrate	Pentose Metabolism	15581	LC/MS Polar	826	1727	195.051	135191	609-06-3	C00181	HMDB00098	0.4929	1.3317	0.7819	4.7348	1.1622	0.27	1.5205	1.312	0.4731	1.4842	1.3326	0.3768	1.0529	1.187	0.9459	0.7682	1	0.275	0.2785	0.7807	0.27	0.27	0.27	1.0693	0.418	0.27	0.27
1146	maltose	Carbohydrate	Glycogen Metabolism	15586	LC/MS Polar	913	3329.4	387.114	10991489	6363-53-7	C00208	HMDB00163	0.8677	1.7604	1.6581	1.0982	1.6273	0.2718	1.5222	2.5382	1.2996	0.7794	1.5043	0.2439	1.6259	0.7651	1.4763	0.6859	0.7082	1.0618	0.5767	0.4723	0.4932	0.5801	2.4885	2.8929	0.3573	0.7636	0.6764
3774	1-methyladenosine	Nucleotide	Purine Metabolism, Adenine containing	15650	LC/MS Pos Early	1242	2120	282.12	27476	15763-06-1	C02494	HMDB03331	0.9869	0.8674	1.0131	0.9126	1.2078	0.9266	1.0538	1.0492	1.1026	0.5724	0.8988	0.8452	1.3462	1.0408	1.116	0.7841	0.8283	1.2092	0.9062	0.7741	0.7913	1.3205	1.1061	1.0525	1.0646	1.0283	0.8726
4284	2-isopropylmalate	Xenobiotics	Food Component/Plant	15667	LC/MS Polar	100000409	2605	175.061	77	3237-44-3	C02504	HMDB00402	0.4465	1.2052	1.5056	0.8153	0.9063	0.4465	0.4465	2.1215	0.4465	0.8253	30.5212	0.7041	0.4465	0.4465	0.4465	0.4465	0.4465	0.5992	0.4465	0.4465	0.4465	0.4465	0.9165	0.4465	0.4465	8.7765	0.4465
336	3-methyl-2-oxovalerate	Amino Acid	Leucine, Isoleucine and Valine Metabolism	15676	LC/MS Neg	100000036	2064.2	129.056	47	1460-34-0;51829-07-3	C00671	HMDB03736	1.6116	2.0426	0.8758	0.7918	1.6113	0.9328	0.7571	1.3436	1.1652	2.0528	1.1094	0.7968	0.9602	1.351	1.2245	1.1295	1.0239	0.7102	0.8076	0.7445	1.0687	0.8584	0.978	0.9025	1.3847	0.7938	0.8922
69	3-methylhistidine	Amino Acid	Histidine Metabolism	15677	LC/MS Neg	100000042	906.3	168.078	64969	368-16-1	C01152	HMDB00479	3.157	2.128	0.137	0.2578	2.7581	0.827	1.565	0.4958	0.0374	1.0512	2.8255	0.9539	0.434	0.0313	1.0461	1.1516	1.8168	0.5204	0.6632	0.7772	0.0863	1.1657	2.0802	2.0374	2.181	1.6892	1.6376
250	xanthurenate	Amino Acid	Tryptophan Metabolism	15679	LC/MS Neg	100000015	1476	204.03	5699	59-007	C02470	HMDB00881	1.6407	0.9853	1.0147	0.7795	1.1309	0.4585	0.8073	0.4585	1.6928	1.0526	1.5696	1.0901	0.9832	1.0196	0.4585	0.4585	0.8402	0.4585	0.7261	0.9179	1.0568	0.4585	0.8542	0.8224	1.1669	0.5928	0.4585
486	4-guanidinobutanoate	Amino Acid	Guanidino and Acetamido Metabolism	15681	LC/MS Pos Early	100000096	2320	146.092	500	463-003;463-00-3	C01035	HMDB03464	1.4186	1.0881	0.3745	1.4677	1.2342	0.2554	0.9033	1.2086	1.6864	1.9864	3.2247	1.0831	0.9903	0.6457	2.0482	0.5528	0.3824	0.9614	0.7701	1.0097	0.6042	0.5374	0.7326	0.8052	0.4774	0.6159	2.8381
111	5-hydroxylysine	Amino Acid	Lysine Metabolism	15685	LC/MS Pos Early	100000054	2790	163.108	1029	13204-98-3	C16741	HMDB00450	1.8719	0.662	0.6421	1.119	0.5572	1.9781	0.8283	1.2133	0.8048	2.3301	1.6777	1.098	1.008	0.776	1.2242	0.6376	0.9337	1.2956	1.3302	1.1736	0.9264	1.6775	0.992	0.9693	1.3414	0.853	1.035
389	cystathionine	Amino Acid	Methionine, Cysteine, SAM and Taurine Metabolism	15705	LC/MS Pos Early	310	2270	223.075	439258	535-34-2	C02291	HMDB00099	1.2383	0.8976	0.5601	0.7437	0.8567	0.6662	0.645	1.2142	1.2227	1.6664	1.8291	0.721	1.1017	2.1191	1.0146	0.8546	0.88	0.9742	1.281	0.9357	0.9854	1.5153	2.7706	2.9947	1.1778	0.6819	0.1659
78	imidazole lactate	Amino Acid	Histidine Metabolism	15716	LC/MS Pos Early	100000263	2040	157.061	793	14403-45-3	C05568	HMDB02320	0.823	1.96	1.481	0.8375	0.3955	0.7154	0.8663	1.0596	1.3091	0.6089	1.0888	0.7361	1.588	0.6858	1.0647	1.0843	0.7315	1.1226	0.9881	1.0441	0.7324	0.6212	0.8782	0.842	1.2251	0.666	1.0643
45	N-acetylglutamate	Amino Acid	Glutamate Metabolism	15720	LC/MS Polar	100000282	3106	188.056	70914	5817-08-03	C00624	HMDB01138	0.9976	1.2457	1.2354	0.8205	1.4284	0.8678	0.8299	1.3695	1.0252	1.3643	1.0024	0.5676	1.2456	0.9236	1.5424	0.8217	0.6416	1.1096	1.0934	0.8186	0.9158	1.2365	1.2635	1.2254	0.9032	0.8406	0.5692
1500	suberate (C8-DC)	Lipid	Fatty Acid, Dicarboxylate	15730	LC/MS Polar	100000016	2577.6	173.082	10457	505-48-6	C08278	HMDB00893	1	1.6075	0.6138	0.6138	1.0544	0.6138	1.6746	1.2233	0.9451	3.6683	3.2017	0.6138	1.36	0.6138	1.5077	0.8052	0.7348	0.623	0.6138	0.6138	0.6138	1.1121	0.899	0.7068	0.6138	0.6138	0.7427
4771	4-acetamidophenylglucuronide	Xenobiotics	Drug - Analgesics, Anesthetics	15736	LC/MS Neg	100000043	1400	326.088	83944	120595-80-4		HMDB10316	0.0083	0.0083	0.0083	0.0083	0.7224	0.0083	0.0083	0.0083	0.0083	0.0083	1.2776	0.0083	0.0083	0.0083	0.0083	0.0083	0.0083	0.0083	0.0083	0.0083	11.6976	0.0083	0.0083	0.0083	0.0083	0.0083	0.0083
5297	glycolate (hydroxyacetate)	Xenobiotics	Chemical	15737	LC/MS Polar	203	1790.4	159.011	757	79-14-1	C00160	HMDB00115	2.5534	0.5117	0.9669	1.2557	0.818	1.5411	0.7565	0.4057	0.3522	0.3522	0.4298	0.7462	0.3522	0.3522	0.8646	1.251	1.0849	1.1174	1.3496	0.9592	0.577	1.0322	80.9895	84.3399	1.016	1.0474	1.4066
348	methylsuccinate	Amino Acid	Leucine, Isoleucine and Valine Metabolism	15745	LC/MS Polar	2051	2800	131.035	10349	498-21-5		HMDB01844	0.7972	1.0246	0.703	0.7413	1.3677	1.1429	0.8167	0.826	1.172	1.1122	0.7467	0.8718	1.176	1.2059	1.0544	1.4742	1.0369	1.1515	1.238	0.8083	1.3044	0.9754	0.752	0.5855	0.7671	0.688	0.9319
4148	3-phenylpropionate (hydrocinnamate)	Xenobiotics	Benzoate Metabolism	15749	LC/MS Neg	100000010	2860	149.061	107	501-52-0	C05629	HMDB00764	0.6293	1.0881	0.5879	2.0904	0.2316	1.466	0.3839	1	2.39	0.0676	0.1186	1.4628	1.0904	0.1019	0.0676	2.8667	3.0848	0.5696	3.0524	0.8982	0.1747	0.6416	0.0676	0.0676	0.7628	0.6076	2.3704
4055	hippurate	Xenobiotics	Benzoate Metabolism	15753	LC/MS Neg	100000014	2106.9	178.051	464	495-69-2	C01586	HMDB00714	1.9268	0.9023	0.7859	1.2535	0.8579	0.8873	0.7312	0.5422	1.9317	0.1054	1.6065	2.0208	1.2587	0.7099	0.1332	1.8365	1.6705	1.8177	1.5622	0.6622	1.2135	0.5368	0.1957	0.1762	0.8522	1.2421	1.5222
347	ethylmalonate	Amino Acid	Leucine, Isoleucine and Valine Metabolism	15765	LC/MS Polar	2054	2785	131.035	11756	601-75-2		HMDB00622	0.5345	1.131	0.9297	0.8784	5.1299	1.0864	0.5672	0.9715	0.6464	1.1276	1.1452	0.3848	0.8499	1.1253	1.6603	2.4992	0.5951	1.6566	1.3381	1.6499	0.6363	3.439	0.7263	0.8015	1.1902	0.6292	1.0285
1112	ribitol	Carbohydrate	Pentose Metabolism	15772	LC/MS Polar	100000406	1789.6	151.061	6912	488-81-3	C00474	HMDB00508	0.9887	1.2625	0.9728	1.007	1.4756	0.8487	0.8497	1.0425	0.8394	1.365	1.0798	0.8777	1.092	3.5722	1.0896	1.0464	0.9507	0.993	0.9415	0.7318	1.0313	1.464	1.0974	1.1301	1.1379	0.8266	0.757
4069	benzoate	Xenobiotics	Benzoate Metabolism	15778	LC/MS Neg	100000008	1750	121.029	243	65-85-0	C00180	HMDB01870	0.9858	0.8751	1.2128	0.9653	0.9033	1.3813	0.9069	0.9021	1.0738	0.9915	1.0544	0.7533	1.0194	0.6721	0.8567	0.8699	1.0391	1.0439	0.891	0.9521	0.9376	1.1359	0.9262	2.5809	1.0242	1.1855	1.0085
1313	malonate	Lipid	Fatty Acid Synthesis	15872	LC/MS Polar	818	3447	103.004	867	141-82-2;26522-22-85-0	C00383	HMDB00691	0.6138	1.8141	0.9401	1.2942	1.5672	0.9106	0.904	1.7033	1.1814	0.7814	0.8534	0.9787	1.2671	1.2128	1.2072	0.9763	0.9835	1.1404	1.3292	1.1793	0.8023	1.0701	0.9454	1.0818	0.9458	1.4465	0.8136
1978	glycerophosphorylcholine (GPC)	Lipid	Phospholipid Metabolism	15990	LC/MS Pos Early	100000269	672	258.11	71920	28319-77-9	C00670	HMDB00086	0.3177	0.715	1.3613	1.5862	0.5722	0.6765	1.3577	0.8962	1.3982	0.6709	1.2005	0.9615	1.3684	0.7934	1.9883	1.164	2.9487	0.6994	0.8458	0.8069	0.9881	1.0119	1.2262	0.9473	0.8594	1.97	0.3568
2847	sphingosine	Lipid	Sphingosines	17747	LC/MS Pos Late	297	1393	300.29	5353955	123-78-4	C00319	HMDB00252	0.8975	0.8983	1.1545	1.0003	0.9997	0.7241	1.2039	1.1646	1.8513	1.2903	1.0632	0.9893	1.3958	0.6956	0.8524	0.8926	2.0324	0.8017	0.7567	0.9082	0.8003	1.2064	2.9247	2.2918	1.1214	1.0498	0.618
2696	sphinganine	Lipid	Sphingolipid Synthesis	17769	LC/MS Pos Late	313	1413	302.305	3126	3102-56-5	C00836	HMDB00269	0.8373	0.9061	0.8601	0.9738	0.7763	1.0537	0.9198	1.5132	1.566	1.4696	0.9068	0.9646	1.4534	0.6799	0.6857	1.0728	1.9164	1.0823	0.8888	1.0096	0.9904	1.2803	1.5886	1.5412	1.3598	1.3501	0.7114
1397	dihomolinoleate (20:2n6)	Lipid	Long Chain Polyunsaturated Fatty Acid (n3 and n6)	17805	LC/MS Neg	1231	5730	307.264	6439848	2091-39-6	C16525	HMDB05060	0.2107	1.0156	0.6008	0.6122	1.4667	2.0487	0.6373	1.1024	0.4836	0.9922	0.5418	0.6519	1.0727	0.656	0.5664	2.0798	0.8574	1.9323	1.0495	1.63	1.5668	3.1309	1.0078	0.9741	1.1418	1.5168	1.7134
1737	2-hydroxystearate	Lipid	Fatty Acid, Monohydroxy	17945	LC/MS Neg	1239	5695	299.259	69417	629-22-1	C03045		0.6268	0.9937	1.2238	1.1138	1.0089	0.584	0.6783	0.9983	1.4028	1.1654	0.9355	1.8173	0.9364	0.9427	0.8314	1.0734	0.982	0.8858	1.1514	1.2912	1.7015	1.4302	1.1139	0.6893	1.0017	1.3892	0.918
553	gamma-glutamylhistidine	Peptide	Gamma-glutamyl Amino Acid	18245	LC/MS Pos Early	1235	2740	285.119	7017195	37460-15-4			0.6268	0.8074	1.2195	1.0612	0.2019	0.8861	0.8355	1.2593	1.1378	0.6773	1.0063	0.7733	1.2658	1.0802	0.9656	0.7591	0.6884	1.034	0.9937	0.986	1.1749	0.9449	1.0434	1.1554	1.4297	1.0371	0.4431
4151	paraxanthine	Xenobiotics	Xanthine Metabolism	18254	LC/MS Neg	100000453	2279	179.058	4687	611-59-6	C13747	HMDB01860	1.0523	0.8416	2.1194	0.9641	1.2869	0.3898	0.1346	0.8297	0.8802	0.3111	2.6129	2.0255	0.8121	1.2145	0.678	0.9135	0.5786	1.0359	0.3588	1.0526	0.884	0.4653	1.5246	1.5488	1.3516	1.3134	0.1639
201	gentisate	Amino Acid	Tyrosine Metabolism	18280	LC/MS Polar	100000447	905	153.019	3469	490-79-9	C00628	HMDB00152	1.0251	0.467	0.8379	1.0129	1.3482	0.4225	0.8078	0.6802	5.0505	0.377	1.0712	1.7007	0.6251	1.4739	2.7276	0.3902	1.3019	0.8107	1.5519	0.5002	0.9871	1.3481	0.5551	0.5352	0.3414	0.6553	1.1367
4059	2-hydroxyhippurate (salicylurate)	Xenobiotics	Benzoate Metabolism	18281	LC/MS Neg	1869	2184	194.046	10253	487-54-7	C07588	HMDB00840	1.6091	1.22	2.3062	1.0933	0.9923	0.9604	0.4812	1.0077	3.1908	0.7458	1.0676	1.017	0.6794	1.2975	19.5818	0.8246	0.5701	0.8826	2.1481	0.6592	0.4314	0.8921	1.1252	1.1272	0.846	0.5163	0.8048
4407	quinate	Xenobiotics	Food Component/Plant	18335	LC/MS Polar	100000442	2432.9	191.056	6508	77-95-2	C00296	HMDB03072	5.7275	1.809	1.1052	0.3876	1.0207	0.693	0.5518	0.8361	1.9122	1.132	0.9793	0.39	1.2844	7.6215	0.8672	0.1552	0.1353	1.939	0.4859	0.055	9.9674	0.1313	1.4054	1.4263	0.8152	0.2804	0.1185
266	indolelactate	Amino Acid	Tryptophan Metabolism	18349	LC/MS Neg	100000463	2286	204.067	92904	832-97-3	C02043	HMDB00671	1.2677	1.5581	1.1015	0.6098	0.9049	0.5576	0.6236	1.2046	1.1493	0.7217	1.0161	0.9126	1.1426	1.0133	1.545	0.902	0.9447	0.9867	0.9383	0.9176	0.8199	0.8372	1.3993	1.3036	1.5407	0.9456	0.6951
1503	azelate (nonanedioate; C9)	Lipid	Fatty Acid, Dicarboxylate	18362	LC/MS Polar	2029	2520	187.098	2266	123-99-9	C08261	HMDB00784	1.0259	1.6323	0.8675	0.9071	0.8662	0.5231	1.8621	1.9865	1.5652	2.9496	4.2417	0.8589	1.4374	0.6049	1.8334	0.6008	0.6649	0.6443	1	0.7534	0.5231	0.8115	0.6925	1.0093	1.0256	0.8124	1.4704
498	cys-gly, oxidized	Amino Acid	Glutathione Metabolism	18368	LC/MS Pos Early	1224	2947	355.074	333293	7729-20-6			1.2406	0.5389	1.0421	1.0435	1.6243	0.8269	0.906	1.1819	0.7539	0.8472	0.9754	1.3169	0.7983	0.9745	1.0862	1.1211	1.0092	1.941	0.6138	0.8769	1.0399	0.5982	1.2432	1.3358	0.9908	0.7763	0.8095
555	gamma-glutamylleucine	Peptide	Gamma-glutamyl Amino Acid	18369	LC/MS Pos Early	1268	2991	261.144	151023	2566-39-4		HMDB11171	1.4117	1.1422	1.1723	0.7587	1.0429	0.7362	0.6743	1.3008	1.386	1.8172	1.2364	0.6686	1.0569	1.2403	1.3859	0.6384	0.7404	0.8069	0.803	0.6391	0.9755	0.8336	1.0273	0.9815	1.5177	0.9072	0.4759
376	methionine sulfoxide	Amino Acid	Methionine, Cysteine, SAM and Taurine Metabolism	18374	LC/MS Pos Early	100000039	1272	166.053	158980	3226-65-1	C02989	HMDB02005	0.8575	0.856	1.3727	1.0697	1.3426	0.9234	1.0966	2.4199	1.2873	1.0586	1.6791	0.5871	1.0953	0.8477	1.3771	0.737	0.7333	0.7303	0.6784	0.6883	0.9836	0.9178	1.0164	1.0353	0.8601	0.8698	0.5823
4152	theobromine	Xenobiotics	Xanthine Metabolism	18392	LC/MS Pos Early	100000445	1600	181.072	5429	83-67-0	C07480	HMDB02825	0.7933	1.278	1.2884	1.3093	0.5741	0.1503	0.1363	0.6491	2.5924	0.289	1.5574	2.4627	0.4593	0.7353	0.2383	1.3856	0.7553	1.0628	0.3911	1.1994	0.5126	0.3644	1.5075	1.2509	3.7011	1.2688	0.2549
4153	theophylline	Xenobiotics	Xanthine Metabolism	18394	LC/MS Neg	100000437	2356.9	179.058	2153	58-55-9	C07130	HMDB01889	0.8877	0.5844	2.8381	1.0036	2.0628	0.2731	0.1488	0.6774	1.455	0.3295	2.2755	2.5211	0.8285	0.9964	0.7148	0.9027	0.427	1.2959	0.4006	1.2026	0.8262	0.4247	1.7822	1.8113	1.4233	1.2513	0.2921
1387	eicosapentaenoate (EPA; 20:5n3)	Lipid	Long Chain Polyunsaturated Fatty Acid (n3 and n6)	18467	LC/MS Neg	2050	5450	301.217	446284	10-2005-9;10417-94-4	C06428	HMDB01999	0.244	0.7893	1.8234	0.6365	1.1151	1.648	0.97	0.6156	0.2731	1.3204	0.5855	1.03	0.9247	1.1656	1.5068	2.9876	0.5746	1.7894	0.5488	1.1175	1.7829	1.4248	0.7412	0.5743	1.166	2.246	0.7894
3088	glycocholate	Lipid	Primary Bile Acid Metabolism	18476	LC/MS Neg	342	5163	464.302	10140	475-31-0;863-57-0	C01921	HMDB00138	1.8003	1.4747	1.7975	0.5064	0.9851	0.344	0.7169	1.9319	2.6499	1.9462	1.326	0.8845	1.4232	1.1548	0.6987	1.9852	0.9541	0.2966	1.0149	0.0872	0.2761	0.7509	1.6198	1.6085	0.3171	0.2748	0.6278
3118	glycodeoxycholate	Lipid	Secondary Bile Acid Metabolism	18477	LC/MS Neg	100000436	5281	448.307	3035026	360-65-6	C05464	HMDB00631	2.7524	4.2004	2.8955	4.1863	0.9867	0.4583	0.816	1	3.8548	1.0277	1.4966	0.4135	1.2836	1.8064	0.1243	1.0839	1.8895	0.2564	0.8248	0.1431	0.1742	1.3275	0.832	0.9851	0.1243	0.5314	0.6236
3096	taurochenodeoxycholate	Lipid	Primary Bile Acid Metabolism	18494	LC/MS Neg	1629	5250	498.289	387316	6009-98-9	C05465	HMDB00951	1	0.099	3.9526	0.7952	0.8492	0.3138	1.9374	5.3255	0.94	1.0313	3.847	2.2631	1.2446	1.0835	1.7132	1.3548	0.8761	0.6208	0.8769	0.1566	0.3313	0.8584	1.789	1.7005	0.2534	0.099	0.5293
3089	taurocholate	Lipid	Primary Bile Acid Metabolism	18497	LC/MS Neg	1648	5150	514.284	6675	145-42-6	C05122	HMDB00036	0.5918	0.2642	2.1472	0.2642	0.5521	0.2642	1.0071	2.769	0.8111	1.5649	7.0752	3.5997	1.1354	0.339	0.6508	1.1058	0.8119	0.9929	0.5793	0.2642	0.2642	0.388	1.1964	1.1923	0.2642	0.2642	0.2819
2230	1-stearoyl-2-oleoyl-GPS (18:0/18:1)	Lipid	Phosphatidylserine (PS)	19265	LC/MS Pos Late	100000639	3000	790.559	9547087			HMDB10163	0.4648	1.0044	1.1756	0.892	0.857	0.5606	1.4608	1.6662	1.0147	0.6345	1.1878	1.1251	1.0608	0.5018	0.7224	0.6443	1.6683	0.6396	0.9079	1.6878	1.0727	0.7214	3.0209	2.4121	0.7375	1.4112	0.3912
1070	1,5-anhydroglucitol (1,5-AG)	Carbohydrate	Glycolysis, Gluconeogenesis, and Pyruvate Metabolism	20675	LC/MS Neg	100000580	802	163.061	64960	154-58-5	C07326	HMDB02712	1.1777	0.3114	1.0143	1.3761	0.0434	0.726	1.0395	0.3806	1.1567	0.0521	0.8534	1.4611	1.6671	1.0663	0.3164	0.9857	0.2471	0.7258	1.6241	1.3099	0.9121	0.768	1.7468	1.7021	1.998	1.2455	0.8302
1495	maleate	Lipid	Fatty Acid, Dicarboxylate	20676	LC/MS Polar	100000707	2640	115.004	444266	110-16-7	C01384	HMDB00176	0.6661	1.6957	1.0302	0.8918	1.401	1.071	0.7725	1.4171	2.262	1.3062	2.083	0.7149	0.9698	1.0877	1.6047	0.8995	0.7452	0.9126	1.0907	0.7196	1.092	1.0566	0.5724	0.58	0.6916	0.8392	0.7728
4683	tartronate (hydroxymalonate)	Xenobiotics	Food Component/Plant	20693	LC/MS Neg	100000840	610	118.999	45	80-69-3	C02287	HMDB35227	0.3471	0.1672	1.2786	1.3061	0.1672	0.9959	1.0779	0.6687	1.0041	1.1577	1.4796	1.0313	0.4759	0.1672	1.4506	0.5733	0.9935	0.4501	0.3345	0.1672	1.8722	0.7423	1.1463	0.7699	0.9283	0.8368	0.1672
3964	oxalate (ethanedioate)	Cofactors and Vitamins	Ascorbate and Aldarate Metabolism	20694	LC/MS Neg	100000841	603	88.988	971	144-62-7	C00209	HMDB02329	0.863	0.4567	1.2082	1.0445	0.5163	1.0691	1.3056	1.0017	1.0359	1.0821	1.1235	0.7027	0.712	0.3846	1.4293	0.818	1.2113	0.7377	0.5877	0.3451	1.0797	1.0281	0.9983	0.9367	0.9027	0.7862	0.579
4398	erythritol	Xenobiotics	Food Component/Plant	20699	LC/MS Polar	100000846	1491	167.056	222285	149-32-6	C00503	HMDB02994	1.1836	1.5041	1.0101	1.3936	0.9899	0.656	0.9702	1.0909	0.8356	1.2676	0.8972	0.739	1.463	1.0597	77.0002	0.8083	1.0105	1.4462	0.9743	0.6057	0.8676	1.6937	0.9482	0.985	1.0377	0.7614	0.8212
5302	iminodiacetate (IDA)	Xenobiotics	Chemical	21025	LC/MS Pos Early	100000900	830	134.045	8897	142-73-4	C19911	HMDB11753	1.4611	0.6883	0.8212	0.8787	0.8585	0.771	0.8291	0.7527	0.8523	0.9341	0.863	1.1839	0.9843	1.3023	1.1326	1.1287	1.2581	1.4608	1.199	1.0157	1.0741	1.3466	0.7476	0.7576	1.1364	0.8736	1.729
4274	1,6-anhydroglucose	Xenobiotics	Food Component/Plant	21049	LC/MS Polar	100000939	1175.5	207.051	2724705	498-07-7		HMDB00640	1.5999	0.5759	0.5759	6.2387	0.5759	0.5759	0.7278	0.5759	3.4386	0.5759	0.5759	0.5759	1.7346	0.7943	0.5759	0.5759	0.5759	0.5759	0.5759	0.6302	0.5759	0.5759	0.5759	0.5759	0.6957	0.5759	1.2947
4527	saccharin	Xenobiotics	Food Component/Plant	21151	LC/MS Neg	100000870	2000	181.992	5143	81-07-2	D01085	HMDB29723	0.398	0.5539	0.398	0.398	74.8405	0.5756	0.398	0.398	0.398	0.398	0.398	0.398	1.7913	4.1865	2.9145	8.4221	0.398	0.398	0.9086	0.398	1.8931	0.398	0.5788	0.4408	1	0.398	0.398
1751	3-hydroxymyristate	Lipid	Fatty Acid, Monohydroxy	21158	LC/MS Neg	100000882	5335	243.197	16064	3422-31-9			0.295	1.8065	0.6169	0.6649	1.0658	1.1032	1.1532	1.1968	0.6403	0.734	0.4525	0.7616	1.7091	1.0581	1.2644	0.9925	0.9167	1.9261	1.0075	1.6322	1.0457	0.713	0.7464	0.7066	0.9082	1.1247	1.2945
1745	3-hydroxyoctanoate	Lipid	Fatty Acid, Monohydroxy	22001	LC/MS Neg	100000773	3446	159.103	26613	88930-08-9		HMDB01954	0.4067	7.4998	0.4928	0.7028	1.661	1.0332	1.0624	3.6947	1.1545	0.9876	0.3004	0.5992	1.0737	1.1919	5.7507	0.8003	0.4927	1.348	0.8139	0.9227	0.7116	1.1645	0.9767	1.0136	0.6987	0.7247	0.7556
1731	2-hydroxyoctanoate	Lipid	Fatty Acid, Monohydroxy	22036	LC/MS Neg	100000743	3736.8	159.103	94180	617-73-2		HMDB02264	4.2673	1.4487	0.6263	0.94	1.8588	0.5851	0.8829	1.0716	2.7414	1.1976	0.8046	0.7945	1.3818	0.9113	1.3743	0.7104	0.6974	1.3418	0.663	0.4878	0.6984	0.9488	1.2001	1.071	1.6493	0.7527	0.919
1747	3-hydroxydecanoate	Lipid	Fatty Acid, Monohydroxy	22053	LC/MS Neg	100000997	4634.7	187.134	26612	5561-87-5		HMDB02203	0.2597	6.8311	0.4416	0.5204	1.2644	1.6702	1.2463	4.4544	0.6974	0.7847	0.2638	0.5351	1.5943	1.3092	3.2518	1.2161	0.5943	1.6614	1.133	1.4209	0.9734	1.0266	0.9492	0.8994	0.8351	0.8718	1.2
296	4-methyl-2-oxopentanoate	Amino Acid	Leucine, Isoleucine and Valine Metabolism	22116	LC/MS Neg	100000551	2170	129.056	70	816-66-0	C00233	HMDB00695	1.5475	2.0331	1.0549	0.8175	1.5735	0.9258	0.8131	1.3165	1.2002	1.9613	1.0263	0.9452	0.9496	1.3544	1.201	1.0933	0.891	0.7659	0.9546	0.7514	1.2768	0.7654	0.9737	0.8574	1.4747	0.8771	0.8616
141	phenyllactate (PLA)	Amino Acid	Phenylalanine Metabolism	22130	LC/MS Neg	100000774	2208	165.056	3848	828-01-3	C05607	HMDB00779	1.2563	1.3329	0.9622	0.6905	1.0923	0.5401	0.5993	1.7072	0.8868	0.6441	0.8456	1.0454	1.0695	0.8038	1.1618	0.9994	0.7181	1.095	0.7077	1.0056	0.5155	0.5303	1.1175	1.0194	1.0006	0.731	0.7847
300	alpha-hydroxyisocaproate	Amino Acid	Leucine, Isoleucine and Valine Metabolism	22132	LC/MS Neg	100000706	1840	131.071	83697	10303-64-7	C03264	HMDB00746	1.517	2.0255	0.9235	0.773	1.3866	1.027	0.7125	1.3136	1.0457	1.9034	0.7924	0.8511	1.2824	1.1672	1.0965	0.9951	1.0049	0.647	0.8908	0.8599	0.8849	0.5293	7.0988	6.7717	1.7026	0.9114	0.4588
424	homoarginine	Amino Acid	Urea cycle; Arginine and Proline Metabolism	22137	LC/MS Pos Early	100000961	2882	189.135	9085	156-86-5	C01924	HMDB00670	1.3442	0.8058	1.1658	0.8408	0.6589	1.0544	1.4087	0.5825	2.6965	1.1351	1.5086	0.9987	1.9659	0.9244	1.1023	1.5706	0.985	1.0656	0.978	0.8182	1.2575	0.6672	0.7507	0.7997	2.3705	0.91	1.0578
425	homocitrulline	Amino Acid	Urea cycle; Arginine and Proline Metabolism	22138	LC/MS Polar	100000963	3006.8	188.104	65072	1190-49-4	C02427	HMDB00679	1.5627	1.7565	1.0554	0.6101	0.9776	0.6323	1.0224	0.9388	0.8546	1.2995	1.234	1.2785	1.8734	0.7188	1.3456	0.5748	0.6999	1.6247	0.8532	0.9219	0.4922	1.4877	4.9555	4.6417	0.8127	0.6479	0.7436
5293	EDTA	Xenobiotics	Chemical	22163	LC/MS Neg	100001002	643	291.083	6049	60-00-4	C00284	HMDB15109	1.9757	0.8451	0.9968	0.9415	1.0152	0.9109	0.9388	0.78	1.0017	1.0696	0.8951	0.9598	1.0143	0.9784	1.0216	0.972	1.0694	1.2129	1.0414	0.7902	0.9985	1.1057	1.0717	1.0136	1.3039	0.8026	2.0366
396	cysteine s-sulfate	Amino Acid	Methionine, Cysteine, SAM and Taurine Metabolism	22176	LC/MS Polar	100000808	2273	199.969	115015	1637-71-4	C05824	HMDB00731	1.4981	1.2169	0.9687	1.0103	0.9305	0.9855	0.776	0.9916	0.9329	1.1206	0.8654	1.4469	1.258	1.1595	1.0084	1.388	1.0822	1.2506	1.1927	0.9628	0.8593	1.1624	0.6558	0.7094	0.4549	1.0901	1.3508
36	N-acetylaspartate (NAA)	Amino Acid	Alanine and Aspartate Metabolism	22185	LC/MS Polar	100000787	3143	174.041	65065	997-55-7;997-55-7	C01042	HMDB00812	0.9271	0.8786	0.9996	0.9698	0.7766	0.9762	0.9836	0.8452	1.024	0.7581	0.8344	0.944	1.2352	1.2568	0.9886	1.2279	1.2093	1.5529	1.1437	1.1394	1.542	1.4016	0.6735	0.6115	1.102	1.0004	1.6394
4557	theanine	Xenobiotics	Food Component/Plant	22206	LC/MS Pos Early	100000784	2180	175.108	439378	3081-61-6	C01047	HMDB34365	1.3692	9.2726	25.3597	0.4886	15.0929	0.1149	0.1149	9.5581	0.3516	7.2424	4.2211	1.44	0.4102	7.0838	0.4328	0.3109	0.2047	1.966	0.5779	0.1429	0.2453	0.3185	7.3334	7.1186	0.1149	0.6308	0.1348
3087	cholate	Lipid	Primary Bile Acid Metabolism	22842	LC/MS Neg	136	5165	407.28	221493	81-25-4	C00695	HMDB00619	4.566	0.257	0.4523	1.0779	3.1749	0.1859	0.5594	1.3169	1.4034	0.2803	0.4138	3.919	0.4171	0.5599	1.9981	0.7096	3.1999	1.5562	0.8135	0.1553	0.2824	0.3639	25.4587	24.418	1.1532	2.7365	9.1202
2905	beta-sitosterol	Lipid	Sterol	27414	LC/MS Pos Late	100001033	3054	397.383	222284	83-46-5	C01753	HMDB00852	1.593	0.6139	0.4011	0.9542	1.4495	0.4324	1.4604	2.1883	1.7981	0.5528	0.6124	0.4586	0.9199	0.9799	1.7543	1.9269	0.5534	1.1581	0.6594	1.2297	0.9551	0.8769	1.0201	0.8862	1.5098	1.7237	0.3211
267	indoleacetate	Amino Acid	Tryptophan Metabolism	27513	LC/MS Neg	100001034	2200	174.056	802	6505-45-9	C00954	HMDB00197	0.9461	1.9772	0.6636	1.4704	0.6863	3.6766	1.0041	2.1267	1.0746	0.5246	0.4281	0.8543	0.7848	0.6416	0.9959	1.3897	8.1732	0.8134	3.4418	0.817	0.7605	0.3965	0.8684	0.8461	1.8402	3.3765	1.0067
3928	1-methylnicotinamide	Cofactors and Vitamins	Nicotinate and Nicotinamide Metabolism	27665	LC/MS Pos Early	55	1940	137.071	457	1005-24-9	C02918	HMDB00699	1.1379	0.428	1.1363	0.4648	1.1921	1.4849	1.7539	0.2662	1.3236	0.449	0.8457	1.3274	0.931	0.6306	0.9507	1.5698	1.4864	0.8355	1.1318	1.5761	1.1294	1.0309	0.9666	0.9691	1.4538	1.1702	0.867
281	3-indoxyl sulfate	Amino Acid	Tryptophan Metabolism	27672	LC/MS Neg	100000467	2222.2	212.002	10258	2642-37-7		HMDB00682	2.6521	2.303	0.9909	0.3872	0.5302	0.8218	0.6716	1.4711	1.5345	0.388	0.5913	0.8632	0.7562	3.2487	0.2661	1.6207	0.8476	0.4534	1.0091	1.2982	1.5706	2.0255	0.539	0.5255	2.5051	0.3212	1.1482
2	N-acetylglycine	Amino Acid	Glycine, Serine and Threonine Metabolism	27710	LC/MS Pos Early	100001006	826	118.05	10972	543-24-8		HMDB00532	0.6625	1.0085	0.8573	1.069	0.5351	2.2238	1.0417	1.0162	0.9858	1.0048	0.6988	0.6953	1.2202	0.9952	0.7317	1.3031	0.7071	0.8724	2.6496	1.5184	1.6476	3.0843	0.869	0.8307	0.8992	1.0588	1.7826
456	creatine	Amino Acid	Creatine Metabolism	27718	LC/MS Pos Early	1221	1947	132.077	586	57-00-1	C00300	HMDB00064	0.4039	0.5722	0.6146	1.2242	1.3024	1.3749	1.2463	0.536	1.3903	1.8052	1.002	0.8169	0.8327	1.1253	1.0216	1.1386	0.6796	0.5672	0.9997	0.9414	1.5952	1.7546	0.7445	0.7126	1.5683	1.0003	1.0527
1219	galactonate	Carbohydrate	Fructose, Mannose and Galactose Metabolism	27719	LC/MS Polar	100001026	3085	195.051	128869	299-28-5	C00880	HMDB00565	2.5225	2.0866	1.7821	0.8479	1.2519	0.3205	0.8151	0.4818	5.9084	1.2291	1.0434	1.0236	1	0.1952	0.5353	0.306	0.7281	6.096	0.0732	0.1718	0.0732	0.6285	1.1185	1.2788	0.1197	0.5129	0.3008
1113	ribonate	Carbohydrate	Pentose Metabolism	27731	LC/MS Polar	100001007	2425	165.041	5460677	5336-08-03	C01685	HMDB00867	0.6448	2.189	1.1312	0.9184	0.2798	0.7401	1.0456	1.6272	0.4095	0.2798	1.0871	0.7067	1.29	1.0552	1.0885	0.8726	1.1557	0.364	0.6155	0.792	0.8007	1.7235	1.5611	1.0305	0.981	1.019	0.9047
3961	threonate	Cofactors and Vitamins	Ascorbate and Aldarate Metabolism	27738	LC/MS Polar	100001022	2384	135.03	151152	70753-61-6	C01620	HMDB00943	0.7988	0.5334	1.2355	1.1206	0.3737	1.0049	1.5025	1.1114	1.1097	1.0121	1.2601	0.7275	0.6872	0.3077	1.7673	0.8797	1.2521	0.7535	0.4085	0.2326	1.0898	1.2066	0.9951	0.9792	0.8075	0.9163	0.4485
68	1-methylhistidine	Amino Acid	Histidine Metabolism	30460	LC/MS Neg	100001051	1227	168.078	92105	332-80-9	C01152	HMDB00001	1.6873	0.9938	0.8166	1.2001	0.897	0.921	1.5997	0.8634	0.951	1.0028	1.1622	0.8404	1.4822	0.8732	1.2498	0.8517	1.1887	0.9972	1.0331	0.9753	0.7617	1.0921	1.4194	1.36	1.2789	1.1113	0.9554
4465	N-(2-furoyl)glycine	Xenobiotics	Food Component/Plant	31536	LC/MS Polar	100001086	1230	168.03	21863	5657-19-2;5657-19-2		HMDB00439	3.4389	1.9869	2.7605	0.9766	2.1242	0.2026	0.4412	0.9298	4.8644	1.0234	1.2937	0.2026	0.8244	0.6831	0.3787	0.2026	0.2026	1.0711	0.3618	0.2026	0.2026	0.2026	0.2026	0.4909	0.2026	0.2026	0.2026
1016	DSGEGDFXAEGGGVR*	Peptide	Fibrinogen Cleavage Peptide	31548	LC/MS Neg	100001323	2535	731.317					1	1	1	1	1	1	1	1	1	1	1	1	1	1	1	1	1	1	1	1	1	1	1	1	1	1	1
4053	pyridoxate	Cofactors and Vitamins	Vitamin B6 Metabolism	31555	LC/MS Neg	100001121	2185	182.046	6723	82-82-6	C00847	HMDB00017	1.0216	0.8529	0.7549	1.4168	0.7731	0.6141	3.0158	0.5288	1.0624	1.0075	1.192	0.7875	1.5809	0.9312	7.2631	0.4673	1.0977	1.1175	0.9942	0.8566	1.0058	0.7385	0.9188	0.926	1.0499	1.0243	1.2734
3022	androsterone sulfate	Lipid	Androgenic Steroids	31591	LC/MS Neg	100001073	5022	369.174	159663	2479-86-9		HMDB02759	2.5265	1.9434	0.6483	0.8021	0.5121	3.5727	2.7862	1.4596	0.8438	3.604	1.0669	0.3509	0.5179	0.9331	0.4628	3.3906	3.3803	0.6306	0.2115	0.5189	2.0962	0.5683	0.6814	0.6764	1.7316	0.7886	1.8461
1529	3-carboxy-4-methyl-5-propyl-2-furanpropanoate (CMPF)	Lipid	Fatty Acid, Dicarboxylate	31787	LC/MS Neg	100001178	2800	239.093	123979	86879-39-2		HMDB61112	0.9687	1.334	8.8727	0.468	5.0214	5.7368	1.0313	1.0466	0.8167	0.6342	0.4892	0.6623	0.3446	15.2354	14.202	7.6217	0.6622	1.0323	4.5587	0.5192	14.8787	0.0816	0.1862	0.1702	5.2711	16.6615	0.7405
1593	butyrylglycine (C4)	Lipid	Fatty Acid Metabolism (also BCAA Metabolism)	31850	LC/MS Neg	100001151	1470	144.067	88412	20208-73-5		HMDB00808	0.2949	0.2949	1	0.2949	1.6049	0.9368	0.5806	0.2949	0.2949	1.6248	0.7164	0.2949	0.8935	1.0781	0.2949	1.4914	0.2949	1.0742	1.348	0.2949	1.1256	3.3359	0.5637	0.8819	0.2949	0.6495	0.2949
1596	propionylglycine (C3)	Lipid	Fatty Acid Metabolism (also BCAA Metabolism)	31932	LC/MS Polar	100001150	1502.5	130.051	98681	21709-90-0		HMDB00783	1.6426	0.7345	0.7739	0.9558	0.5726	1.1815	1.0425	0.735	2.2773	0.6337	0.9575	0.469	1.0924	1.2381	0.6732	0.947	0.699	0.2638	4.0773	0.4467	1.8763	1.7554	1.4927	1.4434	0.3323	1.2141	0.7211
1749	3-hydroxysebacate	Lipid	Fatty Acid, Monohydroxy	31943	LC/MS Polar	100001145	2411	217.108	3017884	73141-46-5		HMDB00350	0.4574	17.3024	0.4574	0.9762	2.5543	2.1378	1.0642	3.0767	1	0.8319	0.7073	0.4574	0.9509	0.6481	15.2319	1.199	0.4574	1.759	0.9185	1.3095	0.8405	1.5268	0.9701	0.998	1.0363	0.9167	1.5585
168	3-(4-hydroxyphenyl)lactate (HPLA)	Amino Acid	Tyrosine Metabolism	32197	LC/MS Neg	240	1379	181.051	9378	6482-98-0	C03672	HMDB00755	1.1081	1.1807	1.0262	0.9093	0.7837	0.928	1.1156	1.3384	0.9596	0.9617	1.112	0.8097	1.7798	0.9738	1.5551	0.8108	0.969	1.4482	0.7444	0.9572	0.6026	0.7691	1.8587	1.7524	1.4661	0.93	0.6107
1634	acetylcarnitine (C2)	Lipid	Fatty Acid Metabolism (Acyl Carnitine, Short Chain)	32198	LC/MS Pos Early	100000802	2282	204.123	1	5080-50-2	C02571	HMDB00201	0.8647	1.6199	0.7272	1.0499	1.299	1.4362	1.0666	1.1854	0.9237	1.4698	0.8065	0.7292	1.2368	1.1033	0.8605	0.9411	0.5253	1.7053	1.155	1.1029	0.8297	1.3118	0.8277	0.8097	1.1988	0.6494	1.5885
441	hydroxyproline	Amino Acid	Urea cycle; Arginine and Proline Metabolism	32306	LC/MS Pos Early	1001	1064	132.065	5810	51-35-4	C01157	HMDB00725	1.9583	0.8355	0.5895	0.7922	1.1326	1.3491	0.4529	0.9579	0.5529	0.9109	0.6884	0.8731	1.1329	1.6421	1.2	1.134	2.0328	0.6296	1.3043	1.2248	1.0003	0.7367	1.0784	0.9997	1.9314	1.7579	1.3079
1638	hexanoylcarnitine (C6)	Lipid	Fatty Acid Metabolism (Acyl Carnitine, Medium Chain)	32328	LC/MS Pos Early	100000781	3358	260.186	6426853	6920-35-0		HMDB00705	0.5547	1.146	0.5598	0.7865	1.3955	1.2598	0.6145	1.1686	0.7931	2.185	0.5231	0.8508	1.1914	1.4626	1.2534	1.0744	0.7551	1.5813	1.6056	1.4263	0.7326	1.4996	0.753	0.8601	1.675	0.7186	1.5979
3761	AMP	Nucleotide	Purine Metabolism, Adenine containing	32342	LC/MS Pos Early	209	1013	348.07	6083	149022-20-8	C00020	HMDB00045	0.791	0.8048	0.6448	0.9672	0.5963	0.4506	1.0487	1.0772	1.2542	1.3215	0.8528	0.9394	1.0421	0.7379	0.4652	1.3751	1.5812	1.1247	0.9958	1.0679	0.7572	1.0189	1.5772	1.3789	0.5595	2.2264	5.2529
3095	glycochenodeoxycholate	Lipid	Primary Bile Acid Metabolism	32346	LC/MS Neg	1628	5236.1	448.307	12544	16564-43-5	C05466	HMDB00637	1.6584	0.4808	2.4432	1.3622	0.8918	0.2914	1.0035	2.1871	1.4945	1.5367	0.8165	0.3678	0.9965	1.5137	1.6644	0.8681	0.4436	0.2109	0.5605	0.1282	0.6004	1.2105	1.9038	1.7417	0.2092	0.2023	0.413
86	1-methyl-4-imidazoleacetate	Amino Acid	Histidine Metabolism	32350	LC/MS Pos Early	100001208	2064	141.066	75810	2625-49-2	C05828	HMDB02820	1.2133	0.8656	0.9584	0.9178	0.65	1.0784	1.0216	1.4296	0.9293	0.6277	1.047	0.6887	1.9292	1.1073	0.8335	0.6642	0.8783	1.2847	0.9784	1.0431	1.1178	1.9548	0.9254	0.9205	1.3335	1.6726	2.1239
1263	N-acetylneuraminate	Carbohydrate	Aminosugar Metabolism	32377	LC/MS Pos Early	1162	660	310.113	439197	131-48-6	C00270	HMDB00230	0.9197	0.9424	0.9223	0.9321	0.5495	0.9334	1.4522	1.5197	1.0452	0.7279	0.8768	1.0064	1.4195	0.9936	1.1828	1.1478	0.9594	1.4939	1.0201	1.0566	0.988	1.8435	1.5328	1.5924	0.9191	1.4907	0.6873
1510	dodecanedioate (C12)	Lipid	Fatty Acid, Dicarboxylate	32388	LC/MS Neg	100001102	2990	229.144	12736	693-23-2	C02678	HMDB00623	0.7366	0.8026	0.7544	1.051	1.0566	0.782	0.8641	1.2473	1.6366	1.0728	0.8386	0.2751	0.8135	0.2751	1.7893	1.0343	0.7691	1.1295	1.1894	0.6924	0.7236	1.5292	1	1.0896	0.6869	0.6602	1.5787
153	N-acetyltyrosine	Amino Acid	Tyrosine Metabolism	32390	LC/MS Neg	100001104	1680	222.077	68310	537-55-3		HMDB00866	0.6234	0.6234	1.5399	0.6234	0.6234	0.6234	0.855	0.6234	1.0036	0.9032	1.0161	0.7741	0.9937	0.6234	0.799	0.6234	0.6234	0.9964	0.6234	1.5027	0.8595	1.4455	1.0053	1.146	1.2329	0.6234	0.6234
4156	1,3-dimethylurate	Xenobiotics	Xanthine Metabolism	32391	LC/MS Neg	100001106	1671.4	195.052	70346	944-73-0		HMDB01857	2.024	0.6238	2.2657	0.8324	1.3681	0.1327	0.1703	0.9949	1.7728	0.3947	2.9341	2.4154	1.5403	1.4877	0.8131	0.6327	0.4867	1.6845	1	1.2264	0.5679	0.585	2.3179	2.2502	1.1466	0.9239	0.1327
345	3-hydroxy-2-ethylpropionate	Amino Acid	Leucine, Isoleucine and Valine Metabolism	32397	LC/MS Neg	100001170	975	117.056	188979	4374-62-3		HMDB00396	1.3944	1.6867	0.7628	0.5774	0.988	1.0632	0.8039	1.086	1.1256	1.1491	0.8286	0.5372	0.7244	0.8171	1.1483	0.824	0.9964	1.4598	1.0476	0.7051	0.7847	1.1953	0.7979	0.6602	1.1897	1.0416	1.0036
1505	sebacate (C10-DC)	Lipid	Fatty Acid, Dicarboxylate	32398	LC/MS Polar	100001211	2147	201.113	5192	111-20-6	C08277	HMDB00792	0.9139	1.0115	0.853	0.9851	1.1592	1.136	1.1007	1.2396	1.9612	2.341	1.1379	0.2896	0.7915	0.2896	1.0826	0.7776	0.4404	0.9772	0.7701	0.5834	0.668	1.9158	1.0527	1	0.5497	0.6337	1.1733
3933	trigonelline (N'-methylnicotinate)	Cofactors and Vitamins	Nicotinate and Nicotinamide Metabolism	32401	LC/MS Pos Early	100001092	1388	138.055	5570	535-83-1	C01004	HMDB00875	0.9832	0.6726	0.3239	0.4914	1.1752	0.3156	1.0908	1.2546	1.5961	0.381	1.0168	0.6371	2.0762	1.4824	1.7872	0.2383	0.2042	0.8727	0.8768	0.6767	2.4622	1.7398	1.1011	1.1003	0.246	0.9353	0.2615
270	indolepropionate	Amino Acid	Tryptophan Metabolism	32405	LC/MS Neg	100001083	2795	188.072	3744	830-96-6		HMDB02302	1.0615	0.7763	2.2775	0.7549	1.3613	0.7111	0.8928	3.6683	1.5053	0.1661	1.4083	0.5482	1.013	1.4829	0.0083	0.3964	0.7201	1.0735	1.0909	0.752	2.7514	1.2982	0.6279	0.5988	1	0.0083	0.753
1592	butyrylcarnitine (C4)	Lipid	Fatty Acid Metabolism (also BCAA Metabolism)	32412	LC/MS Pos Early	100001054	2860	232.154	439829	25576-40-3	C02862	HMDB02013	0.8588	0.8673	1.0748	0.8833	6.0673	1.5944	0.5011	0.9636	0.6498	3.0577	1.4042	0.6609	1.0364	1.4786	0.5006	2.5398	0.6601	1.7125	1.4779	1.3984	0.6699	4.1739	0.7106	0.7177	1.9656	0.6154	1.0871
1404	docosadienoate (22:2n6)	Lipid	Long Chain Polyunsaturated Fatty Acid (n3 and n6)	32415	LC/MS Neg	100001182	6034	335.296	5282807	7370-49-2	C16533	HMDB61714	0.3918	1.0082	0.6528	0.6509	1.5567	1.4986	0.6682	1.0193	0.5511	1.4819	0.4378	0.6046	1.0688	0.5843	0.6967	1.4061	0.9918	1.8609	1.0279	1.4859	1.3189	2.7992	0.8702	0.8666	1.1504	1.4499	1.6075
1391	docosatrienoate (22:3n3)	Lipid	Long Chain Polyunsaturated Fatty Acid (n3 and n6)	32417	LC/MS Neg	100001195	5823	333.28	5312556	59708-86-0	C16534	HMDB02823	0.3516	0.8698	0.7668	0.3516	1.7282	2.3214	0.3516	1.2232	0.3516	1.6468	0.9547	0.4019	1.5897	0.5768	0.5279	1.0152	0.6178	2.5553	0.7494	1.8263	1.3885	2.7539	1	0.9585	1.5095	1.3181	1.9226
1354	myristoleate (14:1n5)	Lipid	Long Chain Monounsaturated Fatty Acid	32418	LC/MS Neg	100001198	5346.9	225.186	5281119	544-64-9	C08322	HMDB02000	0.1752	1.0576	0.2047	0.4768	1.115	2.664	1.011	0.8878	0.4693	0.8406	0.6011	0.6686	1.8078	0.6691	0.5552	1.2931	0.5903	3.3165	1.0791	2.4547	1.3488	5.1666	1.7488	1.7044	0.9476	0.989	1.8741
3010	dehydroepiandrosterone sulfate (DHEA-S)	Lipid	Androgenic Steroids	32425	LC/MS Neg	100000792	4745	367.159	12594	651-48-9	C04555	HMDB01032	2.1399	0.6647	0.7309	1.1799	0.3136	1.4363	1.279	1.1268	0.7214	1.5419	1.0462	0.308	0.287	1.1238	0.3102	2.1557	1.2226	0.3517	0.3963	0.7234	0.9538	0.6253	0.7471	0.7088	1.4649	0.5844	1.6031
4161	3-methylxanthine	Xenobiotics	Xanthine Metabolism	32445	LC/MS Pos Early	100001108	1415	167.056	70639	1076-22-8	C16357	HMDB01886	1.2964	0.98	1.6421	1.0928	0.6147	0.3733	0.3713	0.807	0.6118	0.5055	1.5976	2.278	0.9169	1.062	0.4059	0.6713	0.8761	1.5581	0.5252	1.7573	1.02	0.4491	1.6546	1.7039	1.4007	0.6281	0.2911
487	guanidinosuccinate	Amino Acid	Guanidino and Acetamido Metabolism	32446	LC/MS Polar	100001212	3550	174.052	97856	6133-30-8	C03139	HMDB03157	0.848	2.4753	0.5801	0.987	1.8084	1.1807	1.5569	0.5801	0.5801	0.7244	0.5801	0.5801	2.0092	1.0608	0.6285	0.8895	0.5801	1.7029	0.9291	1.0242	1.1396	0.6488	0.8391	0.8817	1	0.915	0.9536
1595	propionylcarnitine (C3)	Lipid	Fatty Acid Metabolism (also BCAA Metabolism)	32452	LC/MS Pos Early	100001162	2590	218.139	107738	17298-37-2	C03017	HMDB00824	1.4376	1.0379	0.7554	1.2654	1.0794	0.7768	0.7355	1.1858	1.5057	1.8353	1.5027	0.6649	1.0164	1.3442	0.8276	0.7249	0.6767	0.5307	1.0091	0.6491	1.0186	0.9909	1.1853	1.143	1.1509	0.765	0.9833
1750	3-hydroxylaurate	Lipid	Fatty Acid, Monohydroxy	32457	LC/MS Neg	100001112	5175	215.165	94216	53941-38-1		HMDB00387	0.1145	2.8281	0.3471	0.2958	1.1638	1.4854	1.2195	1.9169	0.2745	0.8666	0.1145	0.7017	1.395	1.185	1.9841	1.4641	0.5196	2.3283	1.469	2.039	1	0.7604	0.6456	0.6148	0.6622	0.8526	1.3561
1913	arachidonoyl ethanolamide	Lipid	Endocannabinoid	32463	LC/MS Pos Late	1488	1560	348.29	5281969	94421-68-8	C11695	HMDB04080	0.7787	0.908	0.7787	0.8605	0.7787	1.6754	0.7787	0.7787	0.7787	0.9799	0.7787	1.0506	1.0987	0.7787	0.7787	0.7787	0.7787	1.8876	0.8547	0.7787	0.7787	2.1493	1.5322	0.9483	0.8297	1.0201	0.9003
1328	caproate (6:0)	Lipid	Medium Chain Fatty Acid	32489	LC/MS Neg	926	2713.7	115.076	8892	142-62-1	C01585	HMDB00535	0.7214	0.8968	1.0697	0.9712	0.8738	0.9867	0.8	1.1284	1.1332	0.9734	0.598	0.7761	0.9175	1.2509	1.0133	1.6325	0.9589	1.101	1.0766	1.0322	1.0347	1.2858	0.8508	1.3401	0.9463	1.034	0.7478
1330	caprylate (8:0)	Lipid	Medium Chain Fatty Acid	32492	LC/MS Neg	932	4362	143.108	379	124-07-2	C06423	HMDB00482	0.853	0.8966	1.1127	0.9994	1.7224	0.6972	1.2878	1.1471	3.6998	2.4107	0.8675	0.4399	0.9574	1.5593	1.1701	0.7721	0.9596	0.947	1.0006	0.8861	0.7473	1.4812	1.1482	1.0427	0.7084	0.5833	0.6549
1336	10-undecenoate (11:1n1)	Lipid	Medium Chain Fatty Acid	32497	LC/MS Neg	100001197	5085.8	183.139	14891	1333-28-4	C13910	HMDB33724	0.9393	0.729	1.1185	0.7663	0.7227	0.9236	1.4524	1.0798	1.0183	1.1716	0.6547	0.9993	1.2308	1.413	1.1876	0.6909	0.701	3.3654	0.6219	0.9615	1.0507	1.0007	0.473	0.4553	1.1755	0.966	1.2036
1389	docosapentaenoate (DPA; 22:5n3)	Lipid	Long Chain Polyunsaturated Fatty Acid (n3 and n6)	32504	LC/MS Neg	100001181	5571	329.249	6441454	2234-74-4	C16513	HMDB06528	0.2293	1.0943	0.8548	0.5921	1.4362	1.963	0.723	0.8577	0.3961	1.2392	0.5299	0.5719	1.3522	1.0022	0.9872	1.9047	0.739	3.1532	0.66	1.348	1.5776	2.8014	0.9978	0.885	1.4492	2.0417	1.3723
172	phenol sulfate	Amino Acid	Tyrosine Metabolism	32553	LC/MS Neg	100001510	2156	172.991	74426	937-34-8	C02180	HMDB60015	1.8279	5.2937	0.6628	1.535	0.9456	0.689	1.1876	1.4566	0.7144	1.0025	0.4646	0.5396	1.0235	1.3974	0.2729	0.9975	1.365	1.3236	1.4129	1.1703	0.3548	2.4684	0.476	0.4447	0.8493	0.6583	0.8575
2944	pregnen-diol disulfate*	Lipid	Pregnenolone Steroids	32562	LC/MS Neg	100001993	3868	238.077					2.4895	1.7486	0.7002	0.6261	0.3564	2.0276	2.0744	1.7369	1.0358	1.1897	1.5144	0.7103	0.5228	2.9797	0.95	2.1939	1.6143	0.9642	0.5542	0.7287	0.7842	0.4373	0.9	0.7966	2.548	0.6513	3.0745
	X - 11261			32578	LC/MS Pos Late		870	286.201					1.6101	1.1317	0.457	1.1017	1.563	1.1511	1.0271	0.6512	0.4835	5.2184	0.8206	1.3546	0.7332	1.3133	2.4962	0.8046	1.0907	2.4893	0.4152	1.4536	0.9729	0.4843	0.8656	0.8464	2.1221	0.8646	0.8721
4014	bilirubin (E,E)*	Cofactors and Vitamins	Hemoglobin and Porphyrin Metabolism	32586	LC/MS Pos Late	100001950	1045	585.271	5315454				1.0639	3.1201	1.4027	1.2667	0.8955	0.8855	1.1067	0.7277	0.8383	0.6057	0.4376	1.2849	1.3411	1.2287	0.8686	0.7008	0.7735	0.9518	1.1634	1.137	0.9743	1.9284	0.8055	0.8524	1.5126	0.6604	0.5584
3162	glycocholenate sulfate*	Lipid	Secondary Bile Acid Metabolism	32599	LC/MS Neg	100001989	4750	254.623					2.0469	1.4031	1.122	0.9195	1.0815	0.7441	0.9614	0.9149	1.2123	1.1327	0.5686	0.8452	1.107	2.2876	0.7545	1.1563	0.9556	1.2555	1.0132	0.8637	0.6043	1.3629	0.9513	0.9868	1.2328	0.7365	2.1444
2943	pregnenediol sulfate (C21H34O5S)*	Lipid	Pregnenolone Steroids	32619	LC/MS Neg	100002067	5000	397.205		1247-64-9			2.6072	1.1207	0.9981	1.1688	0.3376	1.2562	1.6283	2.0748	0.7541	0.9323	0.5725	0.3384	0.6891	1.9079	0.7888	2.8645	1.2888	0.3107	0.6016	0.973	1.0019	0.5729	0.9334	0.9325	2.4472	0.5259	3.0798
3129	glycolithocholate sulfate*	Lipid	Secondary Bile Acid Metabolism	32620	LC/MS Neg	100001657	5011	255.631	72222	15324-64-8	C11301	HMDB02639	1.1327	4.2406	1.7897	1.4878	0.7775	0.5488	0.1944	1.0761	2.4115	0.3496	0.9079	0.7542	0.933	0.8661	0.0188	1.067	1.8502	0.6269	1.9638	1.7173	0.1088	2.4806	0.1181	0.1133	0.5079	0.5153	2.0291
	X - 11381			32698	LC/MS Pos Early		2331	186.112					1.7986	1.1819	0.5216	0.5216	0.5216	0.737	0.5216	0.9949	0.66	1.6143	1.1593	1.0023	0.5216	1.739	0.5216	0.6125	0.7669	1.2683	0.9626	0.9977	0.5216	1.2456	0.5216	0.8058	1.8023	0.5216	1.607
3163	taurocholenate sulfate*	Lipid	Secondary Bile Acid Metabolism	32807	LC/MS Neg	100001990	4750	279.614					0.8578	0.3144	2.3963	0.6489	0.6675	1.35	2.234	1.5897	0.62	1.0051	3.4361	2.2129	0.9963	1.2099	0.8061	1.2758	0.9552	1.7987	1.0037	1.4871	0.7587	0.9753	0.4136	0.4543	1.4932	0.2533	1.9129
3060	andro steroid monosulfate C19H28O6S (1)*	Lipid	Androgenic Steroids	32827	LC/MS Neg	100002152	3871	383.153			C04555	HMDB02759	0.9696	0.5791	0.552	2.7951	0.2973	1.031	0.5404	0.8925	1	2.9724	1.205	0.9245	1.009	3.4199	0.6447	2.2025	0.9165	0.2973	1.0404	2.2124	0.6953	1.1593	1.1809	0.9047	2.2275	1.4024	0.3878
1402	adrenate (22:4n6)	Lipid	Long Chain Polyunsaturated Fatty Acid (n3 and n6)	32980	LC/MS Neg	100001193	5678	331.264	5497181	2091-25-0	C16527	HMDB02226	0.3277	1.1476	0.6004	0.6258	2.5003	1.912	0.8363	1.3169	0.3193	1.2614	0.6048	0.6954	1.5813	0.8353	0.5873	1.6718	0.9804	2.577	1.0196	1.9626	1.5091	3.725	0.8546	0.8797	1.5328	1.6055	1.6103
437	N-alpha-acetylornithine	Amino Acid	Urea cycle; Arginine and Proline Metabolism	32984	LC/MS Pos Early	100000285	2000	175.108	439232	6205-08-09	C00437	HMDB03357	1.9007	1.2393	0.7006	0.8257	1.3574	0.4289	0.4707	2.527	1.0356	1.0692	0.9644	1.4465	1.8028	2.3077	1.8324	0.4173	0.6055	0.6133	1.6155	0.891	1.6354	0.6147	0.4918	0.5201	0.4655	0.8264	0.6668
4435	homostachydrine*	Xenobiotics	Food Component/Plant	33009	LC/MS Pos Early	100001550	1750	158.118	441447	1195-94-4	C08283	HMDB33433	1.4404	0.9239	0.8578	0.9315	0.44	1.1993	0.6608	0.866	1.1909	0.4329	0.4329	0.4329	1.0845	0.4329	0.9708	0.4329	0.4329	6.7601	0.4825	0.4329	0.4329	1	0.4329	0.4329	0.5394	1.1675	1.1113
	X - 11787			33132	LC/MS Pos Early		2319	148.097					0.9104	0.8108	0.9356	1.2998	1.0368	0.9785	1.1961	0.9044	0.9861	0.9927	1.0073	0.8462	1.522	1.8659	1.3982	0.8877	0.9568	0.881	1.2075	0.8076	1.0486	1.0107	1.5187	1.4463	1.044	1.6768	0.5659
5015	pioglitazone	Xenobiotics	Drug - Metabolic	33139	LC/MS Pos Early	100001317	3240	357.127	4829	112529-15-4	C07675	HMDB15264	1	1	1	1	1	1	1	1	1	1	1	1	1	1	1	1	1	1	1	1	1	1	1	1	1	1	1
	X - 11795			33140	LC/MS Pos Early		2590	148.097					1.158	1.2812	0.676	1.6559	0.1257	0.9171	0.8263	0.9981	1.6856	0.9195	0.6489	1.0759	1.3584	2.017	3.048	0.943	0.5152	0.8598	0.6997	0.6762	1.0202	1.1206	1.0019	0.8728	1.7108	0.3239	0.9249
4774	2-methoxyacetaminophen glucuronide*	Xenobiotics	Drug - Analgesics, Anesthetics	33161	LC/MS Neg	100001795	1633	356.099	14367271				0.2415	0.2415	0.2415	0.2415	0.7544	0.2415	0.2415	0.2415	0.2415	0.2415	1	0.2415	0.2415	0.2415	0.2415	0.2415	0.2415	0.2415	0.2415	0.2415	11.1834	0.2415	0.2415	0.2415	0.2415	0.2415	0.2415
4772	2-hydroxyacetaminophen sulfate*	Xenobiotics	Drug - Analgesics, Anesthetics	33173	LC/MS Neg	100001791	1674	246.008	86290013				0.2533	0.2533	0.2533	0.2533	1	0.2533	0.2533	0.2533	0.2533	0.2533	0.3432	0.2533	0.2533	0.2533	0.2533	0.2533	0.2533	0.2533	0.2533	0.2533	11.3173	0.2533	0.2533	0.2533	0.2533	0.2533	0.2533
560	gamma-glutamylthreonine	Peptide	Gamma-glutamyl Amino Acid	33364	LC/MS Pos Early	100001314	1750	249.108	76078708	5652-48-2		HMDB29159	1.1497	0.6533	0.7123	0.9292	0.5486	0.6204	1.0026	1.4064	1.098	0.5259	0.6884	1.0439	1.0286	0.9974	1.2187	1.1358	0.8564	1.0488	0.8452	1.0334	0.9585	0.7004	1.2042	1.0213	1.2332	0.7749	0.914
559	gamma-glutamylphenylalanine	Peptide	Gamma-glutamyl Amino Acid	33422	LC/MS Pos Early	100000491	2992	295.129	111299	7432-24-8		HMDB00594	1.0829	0.7238	1.1543	0.9349	0.668	0.8729	0.9699	1.2866	1.1347	0.8673	1.2117	0.6763	1.4517	0.8531	1.0921	0.7613	0.7411	1.4585	0.92	0.8953	0.728	0.8572	1.1841	1.3598	1.2193	1.0301	0.6922
363	isobutyrylcarnitine (C4)	Amino Acid	Leucine, Isoleucine and Valine Metabolism	33441	LC/MS Pos Early	100001055	2810	232.154	168379	25518-49-4		HMDB00736	1.122	1.1895	1.4909	0.9857	1.3571	0.8765	0.7584	0.2738	1.4423	1.1385	1.0417	0.9187	0.6042	0.791	0.5092	1.225	1.0143	0.5208	2.0038	0.9196	1.8787	0.4804	0.5883	0.5342	1.2259	0.5828	0.9737
3839	pseudouridine	Nucleotide	Pyrimidine Metabolism, Uracil containing	33442	LC/MS Neg	821	1100	243.062	15047	1445-07-4	C02067	HMDB00767	1.0774	0.9538	1.0222	1.0518	0.6885	0.9943	1.0228	0.9917	1.1449	0.8045	0.992	0.87	1.3534	0.8937	0.9749	0.92	0.8401	1.2883	1.115	1.0121	0.8982	1.5019	1.0997	1.0439	1.0981	1.0035	0.8894
1357	palmitoleate (16:1n7)	Lipid	Long Chain Monounsaturated Fatty Acid	33447	LC/MS Neg	452	5475	253.217	445638	373-49-9	C08362	HMDB03229	0.2529	0.907	0.2111	0.7066	1.8824	3.7399	0.9486	0.8759	0.3429	0.9856	1.0144	1.0472	1.6122	0.7487	0.7141	1.3606	0.6993	3.4901	0.977	2.4886	1.7653	7.3903	1.6342	1.5865	1.6316	1.7388	2.6804
51	glutamate, gamma-methyl ester	Amino Acid	Glutamate Metabolism	33487	LC/MS Pos Early	100001103	2170	162.076	68662	1499-55-4;1499-55-4		HMDB61715	1.6195	1.2564	0.8038	0.7747	0.6674	0.7543	1.0916	1.3898	1.205	0.8357	1	0.9865	1.1934	0.9379	0.8618	0.8039	0.5123	1.1767	1	0.9374	1.0097	1.0312	0.8695	1.0338	1.0333	1.2072	1.7192
1370	eicosenoate (20:1n9 or 1n11)	Lipid	Long Chain Monounsaturated Fatty Acid	33587	LC/MS Neg	100001335	5950	309.28	5282768		C16526	HMDB02231	0.6895	2.1201	0.4699	0.8961	1.8692	1.8337	0.9003	1.0323	0.5473	1.8942	0.5571	1.0675	1.0482	0.6169	0.9538	1.3754	0.9144	2.9403	0.7225	1.5838	1.0662	2.6373	0.7809	0.7501	1.5825	1.4353	2.6848
557	gamma-glutamyl-epsilon-lysine	Peptide	Gamma-glutamyl Amino Acid	33934	LC/MS Pos Early	100001262	2725	276.155	7015685	17105-15-6		HMDB03869	0.8069	0.8498	0.6945	0.9051	0.5607	0.838	0.919	1.2561	1.1971	1.0983	1.0593	1.2727	1.0618	1.3935	0.5607	1.0666	0.8922	0.7974	0.9387	1.3365	1.1879	1.0648	0.8404	1.0416	1.5275	1.1644	0.8203
4494	piperine	Xenobiotics	Food Component/Plant	33935	LC/MS Pos Late	100001267	1168	286.144	638024	94-62-2	C03882	HMDB29377	3.0836	0.2451	0.5088	0.6685	0.2259	0.0101	4.9332	0.2202	1.1952	1.8888	4.207	2.517	1.3942	0.0366	0.5377	3.2229	7.3235	3.2774	0.1208	1.2558	0.0462	3.0402	0.8663	0.8341	8.4735	1.004	2.087
1641	octanoylcarnitine (C8)	Lipid	Fatty Acid Metabolism (Acyl Carnitine, Medium Chain)	33936	LC/MS Pos Late	100001247	950	288.217	123701	3671-77-0	C02838	HMDB00791	0.5459	1.3707	0.5172	0.6245	1.2456	1.0495	0.8703	1.0973	0.8535	1.246	0.3128	0.8271	1.4867	1.8626	1.8325	1.2719	0.9461	1.9001	1.8324	1.3019	0.6827	0.9505	0.6913	0.6201	1.4207	0.6686	1.495
17	N-acetylthreonine	Amino Acid	Glycine, Serine and Threonine Metabolism	33939	LC/MS Neg	100001274	821.6	160.061	152204	17093-74-2		HMDB62557	0.9982	0.9132	1.1471	1.0483	0.621	1.1571	1.1687	0.9542	0.9857	0.8981	0.8242	0.6052	1.3067	1.0933	0.9347	0.8903	0.8433	1.3284	1.225	1.0166	1.0018	1.276	1.1368	1.1333	1.0468	1.0473	0.8378
1644	decanoylcarnitine (C10)	Lipid	Fatty Acid Metabolism (Acyl Carnitine, Medium Chain)	33941	LC/MS Pos Late	100001251	1130	316.248	10245190	1492-27-9		HMDB00651	0.5123	1.4234	0.4478	0.627	1.103	1.0445	0.9079	0.9146	0.8746	0.9555	0.2704	0.9465	1.9629	2.4558	1.7939	1.1285	0.8024	2.1456	1.7437	1.4758	0.7402	1.0777	0.7795	0.5374	1.3667	0.6842	1.966
46	N-acetylglutamine	Amino Acid	Glutamate Metabolism	33943	LC/MS Polar	100001253	2140	187.072	182230	2490-97-3	C02716	HMDB06029	1.0064	0.7848	1.3347	0.8416	0.3759	0.5564	1.4232	1.1568	0.9684	1.1914	0.9936	0.8687	1.4655	1.3727	1.0069	0.7953	0.378	0.8672	0.8891	0.7824	0.7959	4.9377	1.2239	1.4157	1.3083	1.057	0.6205
70	N-acetylhistidine	Amino Acid	Histidine Metabolism	33946	LC/MS Polar	100001293	2088	196.073	75619	39145-52-3	C02997	HMDB32055	1.1978	1.2562	1.0654	1.003	0.4435	0.5883	1.1069	1.2218	0.8443	0.8217	0.7344	0.7025	1.3449	2.1749	0.7371	1.2177	0.6499	1.2124	0.997	1.1079	0.5056	1.9824	1.2512	1.0069	1.1403	0.8259	0.8922
561	gamma-glutamyltryptophan	Peptide	Gamma-glutamyl Amino Acid	33947	LC/MS Neg	100001295	1960	332.125	3989307	66471-20-3		HMDB29160	1.0016	0.8432	0.8833	0.773	0.7514	0.9852	1.1205	1.2449	1.0195	1.1185	0.9981	0.9984	1.4621	1.004	1.2748	0.9732	1.0635	1.1585	0.9115	1.1433	0.9424	1.225	0.9797	0.9522	1.2704	0.9461	0.9191
552	gamma-glutamylglycine	Peptide	Gamma-glutamyl Amino Acid	33949	LC/MS Pos Early	100001294	1535	205.082	165527	1948-29-4		HMDB11667	0.976	0.5213	0.6453	1.2515	0.9661	1.4423	1.155	1.0722	0.8834	0.4232	0.522	0.438	1.1338	1.0822	1.0109	1.2717	0.8116	0.8501	1.9089	0.7787	1.667	1.4247	1.0947	0.9891	0.7792	1.1178	0.8421
131	N-acetylphenylalanine	Amino Acid	Phenylalanine Metabolism	33950	LC/MS Neg	100001256	2597	206.082	74839	2018-61-3	C03519	HMDB00512	0.8491	0.6588	1.1923	1.104	0.809	0.7438	1.2749	0.9927	1.3218	1.2492	1.549	0.7731	1.1644	0.9708	0.6435	0.6193	0.6711	0.9969	0.7928	1.7753	0.9039	2.3447	1.0513	0.9692	1.4746	1.0031	0.6812
1646	myristoylcarnitine (C14)	Lipid	Fatty Acid Metabolism (Acyl Carnitine, Long Chain Saturated)	33952	LC/MS Pos Late	100001270	1350	372.311	6426854	18822-89-4		HMDB05066	0.7111	1.4336	0.7133	0.9065	0.9752	1.1183	1.0375	1.2022	1.0096	1.2255	0.622	0.7045	1.7845	1.4493	0.7241	0.8546	0.8251	2.469	0.9904	1.3216	0.8822	1.7088	0.8558	0.7556	1.4313	0.8937	1.3548
430	N-acetylarginine	Amino Acid	Urea cycle; Arginine and Proline Metabolism	33953	LC/MS Pos Early	100001266	2245	217.13	67427	155-84-0	C02562	HMDB04620	0.4972	0.7038	1.0478	0.8615	0.385	0.8071	1.8343	0.8306	1.2351	1.3183	0.8963	0.9035	1.4661	0.9099	0.8105	2.0065	1.0088	1.4465	0.6175	1.0575	1.047	3.2187	1.5896	1.6346	1.8655	1.0923	0.7366
230	N-acetyltryptophan	Amino Acid	Tryptophan Metabolism	33959	LC/MS Pos Early	100001254	2640	247.108	700653	1218-34-4	C03137	HMDB13713	1.0478	0.646	1.7455	0.8591	0.9671	0.5804	1.0329	1.0812	1.2294	0.514	1.8635	0.5191	1.2544	1.8582	0.7696	0.449	0.8968	0.9311	0.8946	2.5504	1.6961	1.7397	0.9156	0.8683	1.4543	0.7448	0.8593
1708	acetoacetate	Lipid	Ketone Bodies	33963	LC/MS Pos Early	1218	1062	103.039	96	3483-11-02	C00164	HMDB00060	0.8821	3.6023	0.6536	1.4995	0.4902	2.3865	0.8002	0.8623	1	8.0714	1.2501	1.0293	0.521	0.4902	0.9884	0.6585	0.4902	2.8766	0.4902	3.1649	0.8046	3.52	0.5944	0.7764	1.0347	0.8885	1.7175
1338	5-dodecenoate (12:1n7)	Lipid	Medium Chain Fatty Acid	33968	LC/MS Neg	100001232	5224	197.155	5312378	2430-94-6		HMDB00529	0.3125	0.8994	0.3125	0.5475	0.8811	2.2527	1.1967	0.9778	0.49	0.6412	0.5645	0.5598	1.3842	1.1457	0.9733	1.7166	0.8786	2.3788	1.5124	2.2169	1.377	2.8766	1.695	1.5169	1	0.7942	1.3337
1384	stearidonate (18:4n3)	Lipid	Long Chain Polyunsaturated Fatty Acid (n3 and n6)	33969	LC/MS Neg	100001229	5395	275.202	5312508	111174-40-4	C16300	HMDB06547	0.1761	1.2057	0.5495	0.473	2.5366	1.7517	1.0386	0.7901	0.1761	2.1195	0.1761	0.7384	0.747	0.6941	0.8394	2.3926	0.8615	2.4955	0.3316	1.4992	1	2.3199	1.1528	0.8964	1.1595	1.7013	1.3345
1359	10-heptadecenoate (17:1n7)	Lipid	Long Chain Monounsaturated Fatty Acid	33971	LC/MS Neg	100001278	5555	267.233	5312435	29743-97-3		HMDB60038	0.3278	0.9017	0.3147	0.5749	1.3562	2.4798	0.858	0.8893	0.4912	1.1505	0.6239	0.845	1.5058	0.8821	0.6852	1.1787	0.7098	3.0692	0.7849	1.6204	1.5295	5.6304	1.1273	1.1179	1.5427	1.4861	2.2559
1367	10-nonadecenoate (19:1n9)	Lipid	Long Chain Monounsaturated Fatty Acid	33972	LC/MS Neg	100001277	5780	295.264	5312513	73033-09-7		HMDB13622	0.3079	1.6888	0.3316	0.865	1.6375	2.0862	0.7616	1.154	0.6008	1.7203	0.6152	0.9554	1.0715	0.8595	0.5411	1.3317	0.9945	2.602	0.845	1.6956	1.0055	4.0636	0.9688	0.9832	1.4937	1.4323	2.8788
3014	epiandrosterone sulfate	Lipid	Androgenic Steroids	33973	LC/MS Neg	100001287	4855	369.174	9929317	22229-22-7			1.799	1.9935	0.4072	0.9006	0.3653	2.2437	1.8284	1.3193	0.6012	2.4405	0.5583	0.3532	0.4129	1.0994	0.5233	2.6745	2.722	0.4189	0.1897	0.2815	1.7634	0.4525	0.5699	0.5951	1.3666	0.7599	1.1063
2908	campesterol	Lipid	Sterol	33997	LC/MS Pos Late	100001269	2873	383.367	173183	474-62-4	C01789	HMDB02869	2.334	0.859	0.3957	0.9473	1.2553	0.3929	1.6256	1.6847	1.3874	0.9961	0.4665	0.596	0.7324	1.0039	1.9334	1.5465	0.5896	1.2596	0.5057	1.225	0.7019	0.7694	0.7849	0.8658	1.6924	1.626	0.3066
1396	linolenate (18:3n3 or 3n6)	Lipid	Long Chain Polyunsaturated Fatty Acid (n3 and n6)	34035	LC/MS Neg	100001337	5450	277.217	5280934		C06426	HMDB03073	0.3672	1.0244	0.1586	0.4355	1.9686	1.955	0.9873	0.7358	0.2629	1.5381	0.425	1.0301	1.0127	0.5537	0.9805	1.0737	0.7038	2.6387	0.4717	1.7486	0.9652	2.1767	1.4498	1.4343	1.4211	1.7226	1.4318
3152	hyocholate	Lipid	Secondary Bile Acid Metabolism	34093	LC/MS Neg	100001279	5046	407.28	92805	547-75-1	C17649	HMDB00760	1.2337	0.6544	0.7876	0.7015	0.9539	0.6335	1.1006	0.7357	0.8687	0.2321	0.2321	0.5071	1.3703	1.3045	1.3145	1.4645	0.7679	1.0975	1.4974	1.8429	0.4259	0.441	1.3643	1.4058	1.9019	1.3324	2.9649
4775	3-(cystein-S-yl)acetaminophen*	Xenobiotics	Drug - Analgesics, Anesthetics	34365	LC/MS Pos Early	100001797	2420	271.075	5233914				0.1359	0.1359	0.1359	0.1359	0.1359	0.1359	0.1359	0.1359	0.1359	0.1359	0.1359	0.1359	0.1359	0.1359	0.1359	0.1359	0.1359	0.1359	0.1359	0.1359	1	0.1359	0.1359	0.1359	0.1359	0.1359	0.1359
4548	stachydrine	Xenobiotics	Food Component/Plant	34384	LC/MS Pos Early	100001296	1440	144.102	115244	4136-37-2	C10172	HMDB04827	0.473	2.4208	0.0842	0.3179	0.5077	0.8658	4.6244	0.6347	3.4818	0.5416	2.5706	2.6328	2.8739	1.4694	1.9877	1.1342	0.2884	0.2145	0.5271	1.3946	2.7072	1.6572	0.3591	0.3406	0.335	1.3059	0.0894
4160	1-methylxanthine	Xenobiotics	Xanthine Metabolism	34389	LC/MS Neg	100001405	1568.8	165.042	80220	6136-37-4	C16358	HMDB10738	1.5234	1	1.3596	0.9974	0.6683	0.2521	0.2963	0.9468	0.5569	0.4898	1.3178	2.1547	1.081	0.9	0.4081	0.5211	0.7378	1.5562	0.3679	1.7824	1.0729	0.3503	1.5553	1.7341	1.2773	0.3841	0.2521
4162	7-methylxanthine	Xenobiotics	Xanthine Metabolism	34390	LC/MS Pos Early	100001396	1350	167.056	68374	552-62-5	C16353	HMDB01991	1.0994	1.4488	1.247	0.8843	0.7551	0.2254	0.4069	0.7259	3.2028	0.4037	0.6018	1.8267	1.014	0.8161	0.4249	0.986	0.5225	2.0991	0.4712	1.6135	1.0839	0.5939	1.5562	1.5874	2.6111	0.9203	0.4829
4154	1-methylurate	Xenobiotics	Xanthine Metabolism	34395	LC/MS Neg	100001400	1099	181.037	69726	708-79-2	C16359	HMDB03099	1.9344	0.6224	1.4796	0.9688	0.5806	0.2285	0.3747	0.8129	0.4771	0.4926	1.4616	1.8866	1.2473	1.2676	0.5892	0.645	0.471	2.0122	0.6422	1.4103	1.0312	0.5731	1.5413	1.5784	1.1787	0.5969	0.2765
1975	phosphocholine	Lipid	Phospholipid Metabolism	34396	LC/MS Pos Early	267	700	184.073	1014	72556-74-2	C00588	HMDB01565	1.0845	1.1667	0.9094	0.9436	0.9306	0.8226	1.1655	1.3797	1.1676	1.0255	1.1577	0.9131	0.7971	0.8475	1.235	0.7373	0.9431	0.82	0.8727	0.7967	0.9745	0.7662	1.2593	1.1618	0.9503	1.2149	1.4321
4158	3,7-dimethylurate	Xenobiotics	Xanthine Metabolism	34399	LC/MS Neg	100001398	1418	195.052	83126	13087-49-5	C16360	HMDB01982	0.973	1.2844	0.8008	0.8008	0.8403	0.8008	0.8008	0.8395	1.137	0.8008	1.027	1.5428	0.8008	0.9019	0.8008	0.8071	0.8008	0.8008	0.8008	0.8008	0.8008	0.8008	1.6623	1.4346	1.7151	0.8711	0.8008
4157	1,7-dimethylurate	Xenobiotics	Xanthine Metabolism	34400	LC/MS Neg	100001399	1578.6	195.052	91611	33868-03-0	C16356	HMDB11103	0.7919	0.7167	2.6922	0.9369	1.6778	0.1196	0.1705	0.8489	1.1666	0.6688	2.0348	2.7939	1.5162	1.2575	0.8446	0.8589	0.5221	2.1225	0.4557	1.1455	0.8867	0.7193	2.0515	1.9151	1.4941	1.0631	0.2286
4164	5-acetylamino-6-formylamino-3-methyluracil	Xenobiotics	Xanthine Metabolism	34401	LC/MS Polar	100001402	1424	225.063	108214	85438-96-6	C16365	HMDB11105	7.1864	0.7931	4.0693	0.8233	2.5069	0.9513	0.4009	0.7796	0.3923	0.4167	3.5182	1.4527	3.4308	4.8772	2.6803	2.7258	0.4477	2.0818	2.1689	0.6362	0.9002	1.5545	0.7151	0.5567	0.9762	1.2171	0.1766
4159	1,3,7-trimethylurate	Xenobiotics	Xanthine Metabolism	34404	LC/MS Neg	100001397	1985	209.068	79437	5415-44-1	C16361	HMDB02123	0.4967	0.8201	4.4959	0.4322	2.7381	0.2695	0.2695	0.9517	1.3879	0.5508	3.2303	1.7665	0.2695	1.2376	0.4651	0.499	0.2695	1.0269	0.2695	0.4987	0.3547	0.2695	2.4958	2.3553	0.9731	0.7265	0.2695
306	isovalerylcarnitine (C5)	Amino Acid	Leucine, Isoleucine and Valine Metabolism	34407	LC/MS Pos Early	100001393	3085	246.17	6426851	31023-24-2		HMDB00688	1.3109	1.0021	1.0885	1.0958	1.2338	0.8729	0.4124	1.157	1.0368	2.5561	1.2504	0.8452	1.2185	0.7431	0.4309	0.8424	0.7083	1.1997	0.9979	0.8504	0.9147	1.5083	0.9012	0.7425	1.9611	0.4777	1.0077
1650	stearoylcarnitine (C18)	Lipid	Fatty Acid Metabolism (Acyl Carnitine, Long Chain Saturated)	34409	LC/MS Pos Late	100001391	1485	428.373	6426855	18822-91-8		HMDB00848	1.0662	1.488	0.9143	1.0563	0.929	0.5932	0.971	0.9676	1.117	1.5983	0.5331	0.589	1.7349	0.6621	0.6213	0.7126	1.029	1.3917	0.7744	1.0499	0.6719	1.4754	0.7267	0.6519	1.5048	1.1104	1.6495
4163	5-acetylamino-6-amino-3-methyluracil	Xenobiotics	Xanthine Metabolism	34424	LC/MS Polar	100001403	1710	197.068	88299	1196153-01-1	C16366	HMDB04400	3.2507	0.6763	2.2795	0.8564	1.3582	0.3186	0.3168	0.6889	0.5272	0.4821	1.792	1.7702	2.1183	2.0518	1.1842	1.1945	0.4697	1.9812	1.2962	0.8761	0.9595	1.073	1.0405	1.0914	0.8169	0.869	0.2513
2849	sphingosine 1-phosphate	Lipid	Sphingosines	34445	LC/MS Pos Late	100000626	1375	380.256	5283560	26993-30-6	C06124	HMDB00277	0.8983	0.7782	0.9636	1.0365	0.7126	1.0021	1.0606	0.8564	1.1947	1.0168	0.9089	0.8695	1.1605	0.7821	0.6851	0.9059	1.3021	1.0538	0.8762	1.0224	0.9037	1.086	1.5478	1.3905	0.8997	1.19	1.0655
554	gamma-glutamylisoleucine*	Peptide	Gamma-glutamyl Amino Acid	34456	LC/MS Pos Early	100001485	2940	261.144	14253342			HMDB11170	1.3549	1.0709	1.0165	0.6316	1.232	0.6119	0.6542	1.253	1.0474	1.1777	1.1328	0.5076	1.0967	1.1818	1.2152	0.8232	0.7929	0.748	0.5785	0.5356	0.8121	0.7884	1.0717	1.0931	1.2877	0.6898	0.5856
1645	laurylcarnitine (C12)	Lipid	Fatty Acid Metabolism (Acyl Carnitine, Medium Chain)	34534	LC/MS Pos Late	100001392	1235	344.279	10427569	25518-54-1		HMDB02250	0.594	1.3487	0.4407	0.5828	0.866	1.3255	0.9982	1.0018	0.7	0.9343	0.4423	0.7424	1.7035	1.6605	1.1214	1.1413	0.7011	2.5393	1.6671	1.7595	0.7388	1.0153	0.7308	0.6814	1.5995	0.6086	1.3645
305	isovalerylglycine	Amino Acid	Leucine, Isoleucine and Valine Metabolism	35107	LC/MS Neg	100001452	1950	158.082	546304	16284-60-9		HMDB00678	1.8356	1.0842	1.2809	0.57	1	0.865	0.57	0.57	1.8053	1.6983	0.9392	0.6129	1.0941	0.57	1.1499	0.8025	0.57	0.8159	0.8522	0.7926	0.6631	1.2532	0.9793	0.9961	1.0503	0.8889	0.57
3806	7-methylguanine	Nucleotide	Purine Metabolism, Guanine containing	35114	LC/MS Pos Early	100001456	2175	166.072	11361	578-76-7	C02242	HMDB00897	1.1217	0.8267	1.018	0.9398	0.6966	1.027	0.898	1.0158	0.9708	0.8029	0.7975	0.9169	1.3995	1.0494	0.9842	1.3907	1.0724	1.2354	1.0196	1.0214	1.1209	1.2673	0.9232	0.9126	1.2456	0.9327	0.9701
1037	phenylacetylglutamine	Peptide	Acetylated Peptides	35126	LC/MS Neg	100001417	2330	263.104	92258	28047-15-6	C04148	HMDB06344	0.5204	1.4054	0.3283	1.1688	0.3463	0.465	0.3172	0.7644	1.8369	0.4091	0.1736	1.4409	0.3943	1.789	0.6033	1.849	2.4028	0.3756	2.8629	1.0169	0.4979	1.916	0.6441	0.6063	1.7112	0.9831	1.4846
443	prolylhydroxyproline	Amino Acid	Urea cycle; Arginine and Proline Metabolism	35127	LC/MS Pos Early	100001167	2128	229.118	11673055	18684-24-7		HMDB06695	2.5849	0.2973	0.5555	1.0906	0.9023	1.4219	0.9749	0.532	0.6144	0.5778	1.434	0.6922	1.3343	0.9659	0.7609	0.9998	1.2323	1.6667	1.6814	0.9122	1.2411	1.0002	1.6063	1.5849	1.3993	1.0047	2.1181
3872	N4-acetylcytidine	Nucleotide	Pyrimidine Metabolism, Cytidine containing	35130	LC/MS Pos Early	100001413	1580	286.103	107461	3768-18-1		HMDB05923	2.0111	2.0036	1.5203	1.2051	0.4914	1	0.8614	1.0608	1.588	0.265	2.8308	1.3483	1.4744	1.0144	0.5253	0.4126	0.265	2.0608	0.9914	0.6718	0.4847	1.6238	0.9145	1.0168	0.7056	0.8006	1.7833
3870	3-methylcytidine	Nucleotide	Pyrimidine Metabolism, Cytidine containing	35132	LC/MS Pos Early	100001466	2176	258.108	159649	21028-20-6			2.1096	0.6484	0.4653	0.4653	0.4653	1.2446	1.0555	1.0097	0.4653	0.4653	0.8588	0.9174	1.9648	2.2474	0.9903	0.7675	0.7265	0.7694	1.1253	1.3647	0.9441	1.5464	0.5497	0.79	1.2021	1.1084	0.4653
3842	5-methyluridine (ribothymidine)	Nucleotide	Pyrimidine Metabolism, Uracil containing	35136	LC/MS Neg	100001446	1778.1	257.078	445408	1463-10-1		HMDB00884	1.2459	0.9462	1.0295	0.9474	0.7168	0.8664	1.0496	0.9339	0.9705	0.783	1.2156	0.701	1.1284	0.8432	0.8811	0.953	1.0461	1.2757	1.0888	1.0606	0.7995	0.8534	1.2061	1.1342	1.3177	0.954	1.2033
3812	N2,N2-dimethylguanosine	Nucleotide	Purine Metabolism, Guanine containing	35137	LC/MS Pos Early	100001412	2210	312.13	92919	2140-67-2		HMDB04824	0.9936	0.7863	1.0012	0.9507	0.8126	0.847	1.158	0.9946	1.1873	0.7345	0.9619	0.9197	1.6345	0.9727	1.067	1.1073	0.8627	1.4051	1.172	1.0086	0.9988	1.4848	1.1496	1.0908	1.2978	0.9985	1.0489
3785	N6-carbamoylthreonyladenosine	Nucleotide	Purine Metabolism, Adenine containing	35157	LC/MS Neg	100001415	2164	411.127	161466	24719-82-2		HMDB41623	1.0934	0.7232	1.0281	1.1513	0.8507	1.0131	1.0823	1.122	1.1943	0.9917	0.9902	0.9229	1.4399	0.9894	0.8909	0.8998	0.7863	1.4383	1.1472	0.9037	0.9005	1.4209	1.2114	1.0931	1.4238	0.9901	0.7814
493	cysteine-glutathione disulfide	Amino Acid	Glutathione Metabolism	35159	LC/MS Pos Early	100001437	2465	427.095	4247235	13081-14-6		HMDB00656	1.1853	0.9921	0.851	1.0101	0.605	0.5127	1.4235	0.7912	1.1738	0.6118	0.5626	0.4579	1.2495	1.0079	0.824	1.019	0.6702	0.6461	1.3491	0.7267	0.7995	1.2159	1.1817	1.1493	1.0699	2.5983	2.906
1667	oleoylcarnitine (C18)	Lipid	Fatty Acid Metabolism (Acyl Carnitine, Monounsaturated)	35160	LC/MS Pos Late	100001501	1423	426.358	6441392	38677-66-6		HMDB05065	1.123	1.5972	0.7226	1.3613	1.2019	0.996	1.115	0.8761	0.7549	1.0316	0.4708	0.9348	1.3995	0.7697	1.004	0.7798	1.0364	2.0245	0.9054	1.1684	0.5699	1.9123	0.7729	0.7038	1.222	1.0497	1.4131
3827	orotidine	Nucleotide	Pyrimidine Metabolism, Orotate containing	35172	LC/MS Polar	100001416	2250	287.052	92751	314-50-1		HMDB00788	1.2751	1.7784	0.8575	0.9255	0.9244	0.7858	0.8331	1.6132	1.0895	1.4978	0.8668	0.7099	1.8762	1.3923	1.2922	0.8413	1.1387	1.0738	0.9773	0.9991	0.7509	1.8103	1.3291	1.2382	1.3994	1.0009	0.898
4087	catechol sulfate	Xenobiotics	Benzoate Metabolism	35320	LC/MS Neg	100001605	1906	188.986	3083879	4918-96-1		HMDB59724	1.1657	1.502	1.232	0.9923	0.9108	0.7223	0.5906	0.8672	2.2835	0.2681	0.9155	1.7629	1.0612	1.1555	0.2909	0.9798	1.7517	1.5563	1.0077	0.5009	1.6791	0.5097	0.7246	0.7004	0.7173	0.6918	1.0356
342	tiglyl carnitine (C5)	Amino Acid	Leucine, Isoleucine and Valine Metabolism	35428	LC/MS Pos Early	100001597	2962	244.154	22833596	64191-86-2		HMDB02366	0.8685	1.0735	0.9101	0.7561	1.4145	1.0636	1.0932	0.98	1.3819	1.0779	1.3152	0.656	1.5147	1.0679	0.9477	0.5604	0.7139	1.0924	0.71	0.9575	0.5153	0.8108	0.9517	1.02	1.9232	0.4016	0.8107
314	beta-hydroxyisovaleroylcarnitine	Amino Acid	Leucine, Isoleucine and Valine Metabolism	35433	LC/MS Pos Early	100001594	2584	262.165		99159-87-2			1.713	1.3646	0.9123	0.9267	1.5185	0.8565	0.993	1.2706	0.9937	1.8459	1.0063	0.8158	1.4323	0.7709	0.8421	0.807	1.2297	0.8917	0.8127	1.0076	1.3138	1.3561	2.8632	2.6013	1.4658	0.8769	0.8856
364	isobutyrylglycine (C4)	Amino Acid	Leucine, Isoleucine and Valine Metabolism	35437	LC/MS Neg	100001590	1420	144.067	10855600	15926-18-8		HMDB00730	0.7499	1.1656	0.7103	0.4817	0.7022	0.7259	0.4817	0.4817	1.8218	1.6218	0.6844	1.2457	0.7001	0.4817	0.4817	0.5736	0.4817	0.4817	1.3752	0.4817	1.2838	0.8447	0.7701	1	0.4817	1.2176	0.4817
4063	4-hydroxyhippurate	Xenobiotics	Benzoate Metabolism	35527	LC/MS Neg	100001423	1475	194.046	151012	2482-25-9		HMDB13678	0.8638	0.4406	1.2618	1.22	1.6632	0.2788	0.9903	0.4849	1.9376	0.5547	3.3745	0.7375	2.5144	3.2336	2.9551	0.6129	2.0589	1.5256	0.6263	0.6899	2.338	0.4097	1.8016	1.6433	0.5009	0.6944	0.4268
4146	3-(3-hydroxyphenyl)propionate	Xenobiotics	Benzoate Metabolism	35635	LC/MS Neg	100001624	1980	165.056	91	621-54-5	C11457	HMDB00375	0.8901	1.5424	2.0381	0.625	0.8928	0.6542	1.2858	0.2159	3.5743	0.2159	1.9791	0.4783	1.8948	5.675	0.5501	2.9862	1	1.0457	1.6666	0.5457	8.7352	0.2159	0.9217	0.8617	0.7776	0.775	0.6525
496	cysteinylglycine	Amino Acid	Glutathione Metabolism	35637	LC/MS Pos Early	278	2132	179.048	439498	19246-18-5	C01419	HMDB00078	1.6806	0.8911	1.1217	1.1769	1.6414	0.9784	0.9563	1.6089	0.8454	0.8809	0.9585	0.7853	1.0216	1.4843	1.3165	1.2278	0.7282	1.7197	0.7109	1.0885	0.6953	0.6749	1.4084	1.5461	1.1246	0.6953	0.8306
5292	ectoine	Xenobiotics	Chemical	35651	LC/MS Pos Early	100001635	1980	143.082	126041	96702-03-3	C06231		3.539	1.0403	0.4081	0.4081	2.1016	0.6788	0.4081	0.7958	0.4081	0.4081	1.3919	0.8019	0.4081	0.4081	0.4081	3.0324	1.5925	0.6616	0.896	1.068	0.4081	1.7821	1.0533	0.9597	3.2422	0.4543	0.6941
53	N-acetyl-aspartyl-glutamate (NAAG)	Amino Acid	Glutamate Metabolism	35665	LC/MS Pos Early	100001612	1035	305.098	5255	3106-85-2	C12270	HMDB01067	1.0364	0.4293	0.6873	1.2045	0.4293	1.6888	0.7737	0.6539	0.5699	0.8027	0.9517	0.7943	1.1572	1.0604	0.4293	1.1911	1.0364	0.8752	0.4293	1.6541	0.7811	0.4293	0.6231	0.6444	1.3282	0.9636	1.746
1515	tetradecanedioate (C14)	Lipid	Fatty Acid, Dicarboxylate	35669	LC/MS Neg	100001613	3985	257.176	13185	821-38-5		HMDB00872	0.5641	1.1519	0.6403	0.9254	1.1491	1.2402	1.1421	0.6033	1.44	1.3163	0.5777	0.5788	0.5456	0.995	0.9899	1.0531	0.5478	1.81	1.005	1.3776	1.1792	2.28	0.9057	0.992	1.1572	0.5369	1.7863
1735	2-hydroxypalmitate	Lipid	Fatty Acid, Monohydroxy	35675	LC/MS Neg	100001579	5511.2	271.228	92836	764-67-0		HMDB31057	0.4524	0.9966	0.9337	1.0851	0.8486	0.7721	0.7367	0.9055	1.0498	1.0306	0.9378	1.4595	1.1095	0.825	0.7581	1.0701	0.8889	1.4765	1.0041	1.0765	1.2685	1.5098	1.244	0.9083	1.1331	1.4473	0.943
1519	hexadecanedioate (C16)	Lipid	Fatty Acid, Dicarboxylate	35678	LC/MS Neg	100001614	4615	285.207	10459	505-54-4	C19615	HMDB00672	0.899	1.3687	0.9681	1.1128	1.7568	1.9189	0.9894	1.0726	1.9108	1.4042	0.5993	0.9065	1.4992	0.8331	0.923	0.8355	0.9931	1.8535	1.5565	1.26	0.9986	2.4882	0.919	1.0014	0.9285	0.8738	1.9202
1399	dihomolinolenate (20:3n3 or 3n6)	Lipid	Long Chain Polyunsaturated Fatty Acid (n3 and n6)	35718	LC/MS Neg	100001739	5596	305.249	5280581	17046-59-2	C03242	HMDB02925	0.1779	0.6394	1.2783	0.6886	1.5695	1.354	0.6758	1.0231	0.5793	0.9928	1.5119	1.3288	0.871	0.5739	0.4435	1.3668	0.7349	1.6077	0.7724	1.5772	1.4938	2.7866	1.1352	0.8246	1.2298	1.8408	1.0072
4560	thymol sulfate	Xenobiotics	Food Component/Plant	36095	LC/MS Neg	100001757	4410	229.054		89-83-8	C09908	HMDB01878	0.6463	1.014	4.6199	0.5966	1.585	1.3698	7.9144	3.0992	0.4324	2.0982	0.986	1.4884	0.8003	0.9551	2.2756	1.8239	1.2942	0.2153	2.0377	6.1055	0.1558	2.8456	0.3522	0.3886	0.4616	5.9582	0.5801
4110	4-vinylphenol sulfate	Xenobiotics	Benzoate Metabolism	36098	LC/MS Neg	100001755	3320	199.007	6426766	2628-17-3	C05627	HMDB62775	3.4469	0.999	1.8646	14.0423	0.8588	1.3843	0.3583	3.411	6.5175	0.5988	0.6052	1.4509	0.6012	2.8844	0.8275	0.7255	0.5442	0.4584	3.8036	0.2457	0.9863	0.4315	1.9274	1.8834	0.8463	1.001	0.3888
4108	4-ethylphenyl sulfate	Xenobiotics	Benzoate Metabolism	36099	LC/MS Neg	100001756	3580	201.023	20822574	123-07-9	C13637	HMDB62551	5.8387	1.4668	1.2787	1.8136	0.921	2.7629	0.3922	1.1601	7.9357	0.584	0.7198	0.9163	0.5695	0.6505	0.3063	0.4472	2.2281	0.7913	3.362	0.1509	1.2701	0.9681	0.4819	0.5152	1.2836	1.0319	0.8903
4132	p-cresol sulfate	Xenobiotics	Benzoate Metabolism	36103	LC/MS Neg	100001315	2890	187.007	4615423	3233-57-7		HMDB11635	0.4505	2.4081	0.2006	1.7504	0.6937	0.9632	0.6902	0.4069	3.1982	0.3518	0.0585	2.027	0.1102	0.6141	0.0378	1.7904	2.9229	0.3321	2.532	1.0368	0.4608	1.1007	0.2954	0.2893	2.2911	1.5336	1.0674
1279	N6-carboxymethyllysine	Carbohydrate	Advanced Glycation End-product	36713	LC/MS Pos Early	100001768	2500	205.118	123800	5746-04-03			1.9911	1.0511	0.9201	1.0873	1.1398	0.8796	1.2161	1.1348	0.962	1.0476	0.9237	0.8167	1.5641	1.0397	1.1499	0.9294	0.9035	1.3175	0.9193	0.6679	0.9058	0.9873	0.8196	0.7757	0.4404	1.0961	2.4174
550	gamma-glutamylglutamate	Peptide	Gamma-glutamyl Amino Acid	36738	LC/MS Pos Early	331	1775	277.103	92865	1116-22-9	C05282	HMDB11737	1.0954	0.5966	0.8241	1.2264	1.1792	1.092	0.8095	1.1125	0.7065	2.336	0.7224	0.5314	1.7106	1.5592	1.9832	0.908	0.7527	1.2787	0.803	0.5768	1.1909	1.4271	0.8348	0.8843	2.1244	1.8096	0.672
337	2-hydroxy-3-methylvalerate	Amino Acid	Leucine, Isoleucine and Valine Metabolism	36746	LC/MS Neg	100001541	1800	131.071	164623	488-15-3		HMDB00317	1.3616	2.7325	0.8882	0.7554	1.8239	0.7974	0.5831	2.807	0.6258	2.1199	1.0542	1.0347	0.994	2.0102	1.594	0.8701	0.8176	0.624	0.9939	0.9776	0.7354	0.71	1.6653	1.4883	1.4174	1.0266	0.3812
1703	deoxycarnitine	Lipid	Carnitine Metabolism	36747	LC/MS Pos Early	100001662	2052	146.118	134	6249-56-5	C01181	HMDB01161	1.1258	0.8084	1.0063	0.9584	0.9549	0.7966	0.9783	1.0022	1.2388	0.5962	0.6323	0.7193	1.459	1.6231	1.0121	0.9488	0.8461	1.105	1.5471	0.9756	0.7542	0.5892	1.0785	1.0113	1.3036	1.103	1.2085
1493	3-methyladipate	Lipid	Fatty Acid, Dicarboxylate	36749	LC/MS Polar	100001765	2865	159.066	12292	3058-01-03		HMDB00555	0.678	1.0096	2.2184	0.6546	1.5687	0.5352	0.8343	1.0582	0.9976	0.6445	0.5352	0.5443	0.6437	1.3044	1.069	1.0934	0.5352	1.6901	0.5352	0.8443	1.1594	0.5352	0.784	0.6702	0.6	1.3274	1.3058
100	N6-acetyllysine	Amino Acid	Lysine Metabolism	36752	LC/MS Neg	100001734	1059	187.109	92832	692-04-6	C02727	HMDB00206	1.1773	1.2392	0.8798	1.1573	0.8343	1.0142	1.1246	0.9758	1.0953	0.9404	1.674	0.6487	1.1876	0.9023	1.0408	0.7281	0.8806	1.0319	1.0376	0.8863	0.8471	1.3315	1.0526	0.9858	0.9134	0.9356	0.9137
1522	octadecanedioate (C18)	Lipid	Fatty Acid, Dicarboxylate	36754	LC/MS Neg	100001615	5043	313.238	70095	871-70-5		HMDB00782	2.1103	1.12	0.877	1.2561	1.3906	1.3296	0.7267	1.0498	0.7271	1.5428	0.629	0.5846	1.1305	0.8299	0.6151	0.6626	1.8279	1.0581	1.5106	1.1437	1.0051	0.9949	0.896	0.8393	0.9944	0.8312	1.8797
2891	7-HOCA	Lipid	Sterol	36776	LC/MS Neg	100001609	5288.1	429.301	3081085	115538-85-7	C17337	HMDB12458	1.5687	0.8939	1.3911	0.981	0.7003	0.7001	0.7596	0.8731	1.019	1.8152	0.5836	0.7692	1.1058	1.9456	1.1196	0.7582	0.7772	1.1629	0.9707	0.9653	1.04	0.877	1.4438	1.4128	1.4967	1.5265	0.6836
2893	3beta,7alpha-dihydroxy-5-cholestenoate	Lipid	Sterol	36803	LC/MS Neg	100001611	5275	431.317	3081084	115538-84-6	C17335		1.4298	0.9162	0.2365	1.3555	0.8788	1.0154	0.9846	0.9757	0.8155	0.8337	0.2041	0.7624	0.9778	1.7945	2.0151	1.3138	0.9405	1.4213	1.0367	1.1461	0.833	0.7521	1.2197	1.207	1.5674	0.9262	1.2166
429	dimethylarginine (ADMA + SDMA)	Amino Acid	Urea cycle; Arginine and Proline Metabolism	36808	LC/MS Pos Early	100001810	2850	203.15	123831	102783-24-4	C03626	HMDB01539	1.0326	0.728	0.9356	0.9952	0.8421	1.0276	1.3236	0.9539	1.0522	0.8222	0.9098	0.9552	1.4019	0.9469	1.0356	1.0051	0.9867	1.1198	1.2227	0.9399	0.9912	1.2644	0.9976	1.0039	1.5052	1.1437	0.9375
3131	taurolithocholate 3-sulfate	Lipid	Secondary Bile Acid Metabolism	36850	LC/MS Neg	100001658	5027	280.622	440071	64936-83-0	C03642	HMDB02580	1.1719	0.6916	3.3952	0.5814	0.6062	0.581	0.4219	1.3759	1.2251	0.2215	5.4152	3.2556	1.2208	0.3249	0.0375	0.9295	1.7621	1	1.6246	1.6912	0.0667	0.9974	0.0546	0.0375	0.3937	0.1797	3.5127
1291	succinylcarnitine (C4-DC)	Energy	TCA Cycle	37058	LC/MS Pos Early	100001948	2291	262.128	71464481	256928-74-2		HMDB61717	1.1233	0.6009	0.9122	1.2346	0.838	0.6395	1.3346	1.0031	0.7428	1.2156	0.7238	0.4644	1.6435	0.9969	1.32	1.0149	1.2048	1.2421	0.9256	0.9545	0.8078	1.2356	1.1211	1.0069	1.1515	1.4941	0.8043
548	gamma-glutamylalanine	Peptide	Gamma-glutamyl Amino Acid	37063	LC/MS Pos Early	100001843	1986	219.098	440103	5875-41-2		HMDB29142	1.4698	1.6012	1.1411	0.9906	1.0963	0.7322	0.7836	2.1649	1.1657	0.9933	0.8468	0.6584	1.2612	1.7522	2.0159	0.8458	0.7186	1.1028	0.5738	0.5152	0.9867	0.7084	0.9709	1.0067	1.1558	1.3533	0.4268
1729	alpha-hydroxycaproate	Lipid	Fatty Acid, Monohydroxy	37073	LC/MS Neg	100001723	1920	131.071	99824	6064-63-7		HMDB01624	1.9155	0.9069	0.6966	1.2113	0.7957	1.0976	0.3122	1.3939	0.5967	1.3025	0.3122	0.3122	1.2093	0.929	0.4928	1.0263	0.451	0.3122	0.9737	1.3134	0.8144	0.9138	2.9784	2.5582	1.0564	1.1305	0.3797
10	N-acetylserine	Amino Acid	Glycine, Serine and Threonine Metabolism	37076	LC/MS Polar	100001851	2000	146.046	65249	97-14-3		HMDB02931	1.1071	0.9626	1.2273	1.1271	0.7188	0.8937	1.18	1.1041	0.9364	0.8609	1.1428	0.7656	1.3463	0.9586	0.8587	0.8724	0.8468	1.2487	1.6802	1.1196	0.8482	1.4485	0.9976	1.0677	0.9429	1.1121	0.9533
566	gamma-glutamyl-2-aminobutyrate	Peptide	Gamma-glutamyl Amino Acid	37092	LC/MS Pos Early	100001502	2380	233.113		16869-42-4			1.4708	1.5493	0.3942	0.7125	0.3942	1.793	0.8019	1	0.3942	2.0421	1.2705	0.8336	0.965	2.7027	1.137	0.8195	0.3942	1.0022	0.9048	0.829	0.5898	0.5161	0.7284	0.6433	1.7045	1.1354	1.4161
238	tryptophan betaine	Amino Acid	Tryptophan Metabolism	37097	LC/MS Pos Early	100001743	2673	247.144	442106	20671-76-5	C09213	HMDB61115	0.4652	0.3705	0.9725	2.4191	0.5514	0.191	0.3467	1.372	1.0275	1.4308	1.1398	1.0356	0.9359	0.4044	1.2873	0.887	0.3196	0.3367	1.6509	1.4404	2.6995	1.9754	0.2673	0.2461	0.2777	0.8213	2.2279
673	cyclo(leu-pro)	Peptide	Dipeptide	37104	LC/MS Pos Early	100001925	2670	211.144	7074739	2873-36-1			2.678	1.1315	1.363	0.8444	2.5896	0.7854	0.1992	0.9114	2.1567	0.7961	2.0668	1.342	2.3894	0.8263	0.3195	1	0.994	0.8038	0.1494	0.9775	0.3911	0.1494	1.9211	1.8146	2.5186	0.9924	0.8946
1946	chiro-inositol	Lipid	Inositol Metabolism	37112	LC/MS Polar	100001859	3191.2	225.062		643-12-9	C19891	HMDB34220	0.3056	1.3413	0.2076	0.2076	0.2076	0.2076	9.4464	0.2076	0.7888	0.2076	0.2076	1.1159	1.8026	0.6978	1.1484	0.2076	0.2076	0.2076	0.2076	0.5053	0.2076	0.8841	0.2076	0.2076	0.2076	0.2076	0.2076
4571	4-allylphenol sulfate	Xenobiotics	Food Component/Plant	37181	LC/MS Neg	100001868	3805	213.023					0.5699	0.4862	2.5757	1.2411	1.9825	5.8972	0.5556	6.4981	0.4258	0.999	1.001	1.1622	1.665	1.7368	0.9934	5.6615	2.0213	1.3413	4.0972	0.4678	0.1378	5.204	0.1311	0.1187	0.4667	0.5532	0.8583
3026	5alpha-androstan-3alpha,17alpha-diol monosulfate	Lipid	Androgenic Steroids	37183	LC/MS Neg	100002008	5208	371.19					1.5839	2.2037	0.4681	1	0.3592	2.2934	1.4733	1.159	0.7522	1.5103	0.5061	0.3592	0.5412	0.4427	0.8322	4.1485	2.7564	0.3592	0.3592	0.3592	0.7122	0.7481	0.3592	0.3592	1.5307	0.3592	1.1841
3047	5alpha-androstan-3alpha,17beta-diol disulfate	Lipid	Androgenic Steroids	37184	LC/MS Neg	100002017	4275	225.07					4.1823	4.0818	0.1643	0.3541	0.1643	2.6562	0.6419	2.3272	0.1987	3.4336	1.8342	0.7871	1	2.5491	6.7293	0.7873	1.2445	0.2576	0.1643	0.1643	0.448	0.2088	0.1643	0.1643	2.4744	0.1643	0.6301
3045	5alpha-androstan-3alpha,17beta-diol monosulfate (1)	Lipid	Androgenic Steroids	37186	LC/MS Neg	100002018	4925	371.19					2.1201	2.6695	0.7783	0.9126	0.9577	4.1014	2.6845	1.9308	0.4768	7.8105	1.3648	0.2842	0.5933	0.8605	0.6563	2.9536	2.6584	0.6145	0.5711	0.7121	2.8037	0.4987	0.7314	0.6478	2.0476	0.7357	1.0423
3056	5alpha-androstan-3beta,17alpha-diol disulfate	Lipid	Androgenic Steroids	37187	LC/MS Neg	100002021	4215	225.07					1	4.3152	0.2992	2.7453	0.2205	1.3467	0.917	0.9078	1.2856	1.3701	0.4903	2.0375	1.0384	0.4649	0.811	4.399	8.0812	0.6096	1.9719	0.1959	0.4119	0.1959	0.1959	0.1959	1.9879	0.3294	1.2237
3053	5alpha-androstan-3beta,17beta-diol disulfate	Lipid	Androgenic Steroids	37190	LC/MS Neg	100001987	3880	225.07	242332	571-20-0	C12525	HMDB00493	1.7024	6.2454	0.3489	0.5793	0.5755	2.9067	1.2273	1.6739	0.4534	6.1441	1.9548	0.6861	1.1376	1.7758	3.8335	1.1428	2.1335	0.8475	0.1573	0.2726	1.7681	0.2916	0.7476	0.7192	1.9383	0.6204	0.3443
3052	5alpha-androstan-3beta,17beta-diol monosulfate (2)	Lipid	Androgenic Steroids	37192	LC/MS Neg	100002024	4685	371.19					1.5111	2.2202	0.3277	0.742	0.3681	1.7346	1.441	1.348	0.1984	3.7497	0.5406	0.1984	0.412	1.0453	0.3863	1.8525	1.9154	0.2407	0.1984	0.1984	2.0914	0.337	0.3888	0.4498	1.3292	0.4829	0.4007
2955	5alpha-pregnan-3beta,20beta-diol monosulfate (1)	Lipid	Progestin Steroids	37196	LC/MS Neg	100002009	5180	399.221					2.0788	1.0039	10.0474	0.9373	0.3564	1.1324	2.1759	1.0455	1.0999	0.1868	0.3835	0.7024	0.3204	1.1497	0.6114	2.5017	32.5137	0.2215	0.5053	1.0719	1.1657	0.8776	0.3979	0.4783	2.6969	0.438	35.4671
2964	5alpha-pregnan-3beta,20alpha-diol disulfate	Lipid	Progestin Steroids	37198	LC/MS Neg	100001988	3962	239.085					1.8912	1.7053	8.8343	0.7777	0.2107	1.3154	2.0569	0.9745	2.1276	0.5463	0.7798	1.2256	0.4749	5.4991	0.7864	1.7442	16.2373	0.5841	0.5521	0.7101	0.8281	0.5811	1.155	1.0039	1.8328	0.6769	27.788
2958	5alpha-pregnan-3beta,20alpha-diol monosulfate (2)	Lipid	Progestin Steroids	37200	LC/MS Neg	100002014	5060	399.221					2.0986	0.9455	14.8071	1.4432	0.2489	0.5988	1.6683	0.9429	1.4232	0.4277	0.1505	0.5039	0.4307	3.1708	0.7659	2.6119	21.3918	0.1804	0.4932	1.0545	1.3257	0.6275	0.8243	0.9001	1.9908	0.6657	34.398
3031	androstenediol (3beta,17beta) disulfate (1)	Lipid	Androgenic Steroids	37202	LC/MS Neg	100001992	3740	224.062	87120982		C04295	HMDB03818	1.6107	2.4513	0.5017	0.7267	0.4441	2.1458	1.5648	1.5935	0.9099	4.1183	3.3298	0.5848	0.4923	1.6153	0.8111	1.4424	1.3931	1.0197	0.5804	0.6539	1.1657	0.4161	1.1176	0.9326	2.6061	0.7689	0.6849
3032	androstenediol (3beta,17beta) disulfate (2)	Lipid	Androgenic Steroids	37203	LC/MS Neg	100001994	4065	224.062	87120982		C04295	HMDB03818	1.9494	1.8373	0.8522	1.2772	0.2742	1.3505	0.9558	1.1278	0.9716	1.6908	1.0543	0.6803	0.9091	1.6841	1.3452	2.2324	1.2221	0.6792	0.5588	0.9127	0.5789	1.0284	0.9466	0.8838	2.1611	0.692	1.6224
3035	androstenediol (3alpha, 17alpha) monosulfate (2)	Lipid	Androgenic Steroids	37207	LC/MS Neg	100002026	4712	369.174					2.1788	1.2711	1.1992	1.1221	0.3155	1.2006	0.6605	0.8291	0.6804	0.672	0.5005	0.6309	1.312	1.4849	0.9934	3.8207	1.0557	0.3531	0.3963	0.8793	0.9249	1.123	1.6251	1.5165	1.6271	0.5315	3.2506
3036	androstenediol (3alpha, 17alpha) monosulfate (3)	Lipid	Androgenic Steroids	37209	LC/MS Neg	100002027	5180	369.174					2.1758	2.1081	0.6705	0.6489	0.4547	2.4715	3.1214	1.2458	0.8403	1.331	0.874	0.3172	0.5186	1.6389	0.8182	3.1387	2.197	0.4771	0.2653	0.5547	1.2063	0.6906	0.9134	0.8914	1.5414	0.6625	4.3353
3029	androstenediol (3beta,17beta) monosulfate (2)	Lipid	Androgenic Steroids	37210	LC/MS Neg	100002029	4500	369.174					0.6545	1.1205	0.6967	1.4015	0.3642	2.072	1.1822	0.7321	0.6986	1.3645	2.2002	0.4354	0.4063	0.504	0.5029	1.2793	1.4808	0.936	0.466	0.7548	1.6699	0.6569	1.0382	0.9765	1.5665	1.0235	0.5203
3028	androstenediol (3beta,17beta) monosulfate (1)	Lipid	Androgenic Steroids	37211	LC/MS Neg	100002028	4535	369.174	13847309	521-17-5		HMDB03818	2.37	0.979	0.8315	1.2851	0.3947	1.6566	1.5346	1.4987	0.4507	3.0243	1.6783	0.2562	0.2873	1.4173	0.3129	2.7184	1.1603	0.2832	0.3956	0.8817	1.4752	0.7428	0.7407	0.6912	2.1253	0.5151	0.8908
1487	2-hydroxyglutarate	Lipid	Fatty Acid, Dicarboxylate	37253	LC/MS Polar	100002070	3352.8	147.03	43	40951-21-1	C02630	HMDB0059655	0.6793	1.9327	1.2344	0.869	1.0061	0.7075	0.7349	1.5899	0.8984	0.9939	0.9096	0.5814	1.3671	1.1688	1.3529	0.8526	0.9306	1.1468	0.9541	0.9718	0.8485	1.1435	1.0605	1.1744	0.7344	1.0206	0.5782
446	N-methylproline	Amino Acid	Urea cycle; Arginine and Proline Metabolism	37431	LC/MS Pos Early	100001956	1335	130.086	557	475-11-6			0.7168	2.2033	0.2715	0.3237	1.0736	0.9931	9.3583	0.2727	6.6862	0.3505	1.7696	3.5057	4.6224	1.8073	3.0678	0.5034	0.3431	0.272	0.8572	2.4803	1.1603	0.8553	0.6099	0.5472	1.0069	1.7033	0.1815
3858	N-acetyl-beta-alanine	Nucleotide	Pyrimidine Metabolism, Uracil containing	37432	LC/MS Neg	100002102	773	130.051	76406	3025-95-4	C01073		0.3492	0.3946	1.5682	0.5817	0.626	1.1292	1.4309	0.6155	0.934	0.9674	1.2286	0.7452	1.1919	1.0313	1.1444	0.7527	0.4014	1.3407	1.0331	0.8442	0.4214	1.0749	1.1564	1.0058	1.594	1.1424	0.8767
4969	4-hydroxycoumarin	Xenobiotics	Drug - Cardiovascular	37445	LC/MS Neg	100002049	2470	161.024	54682930	1076-38-6	C20414		0.4218	1.4726	0.9799	1.0982	0.5405	0.4218	0.4218	0.4218	3.666	0.4218	0.4218	1.0201	0.6339	0.4251	0.4218	0.4218	0.8268	0.4218	0.4218	1.0291	0.4218	1.2096	0.4218	0.4218	0.4218	0.8089	2.208
1982	glycerophosphoethanolamine	Lipid	Phospholipid Metabolism	37455	LC/MS Pos Early	100001620	659	216.063	123874	33049-08-0	C01233	HMDB00114	0.4916	0.6141	1.0477	1.0009	0.5388	0.6444	1.0042	0.9991	0.9227	0.9621	1.0847	0.7366	1.0463	0.6974	1.3457	1.0096	1.722	0.8666	0.6415	0.8466	0.9697	1.1734	1.0231	0.8876	1.0188	1.4272	0.5714
4396	ergothioneine	Xenobiotics	Food Component/Plant	37459	LC/MS Pos Early	100002154	850	230.096	3032311	58511-63-0	C05570	HMDB03045	1.4297	0.6379	1.1249	0.2561	0.7578	1.2402	0.4695	0.3649	0.6961	1.8869	1.4491	0.9508	0.2595	1.3525	2.2185	1	0.9474	0.671	0.8169	0.3832	1.5462	0.2561	0.5888	0.7918	1.7928	2.352	1.9305
4770	4-acetaminophen sulfate	Xenobiotics	Drug - Analgesics, Anesthetics	37475	LC/MS Neg	2049	1792	230.013	83939	10066-90-7;32113-41-0	C06804	HMDB59911	0.0142	0.0142	0.0142	0.0142	1.2312	0.0142	0.0142	0.0142	0.0142	0.0142	0.7688	0.0142	0.0142	0.0142	0.0142	0.0142	0.0142	0.0142	0.0142	0.0142	9.4091	0.0142	0.0142	0.0142	0.0142	0.0142	0.0142
1403	docosapentaenoate (n6 DPA; 22:5n6)	Lipid	Long Chain Polyunsaturated Fatty Acid (n3 and n6)	37478	LC/MS Neg	100001580	5624.5	329.249	6441454	25182-74-5	C16513	HMDB01976	0.2182	0.8175	0.9812	0.5623	2.7233	2.0393	0.8272	0.8809	0.4837	1.0662	1.0188	1.1927	1.2825	1.0703	0.4747	1.4385	0.8674	1.741	0.8692	1.7865	2.162	2.5415	0.9306	0.6871	1.2595	1.9939	1.522
2931	17alpha-hydroxypregnenolone 3-sulfate	Lipid	Pregnenolone Steroids	37482	LC/MS Neg	100002128	4800	411.185	152971	28901-70-4		HMDB00416	1.5655	0.5552	1	0.7962	0.5546	0.8776	1.0533	1.6608	0.8951	0.6079	0.6279	0.4739	0.603	3.9453	0.6782	1.4089	1.1719	0.4739	0.4739	0.8862	0.7112	0.4739	3.6749	3.4138	1.1795	0.6533	4.0066
465	N-acetylputrescine	Amino Acid	Polyamine Metabolism	37496	LC/MS Pos Early	192	2230	131.118	122356	18233-70-0	C02714	HMDB02064	0.9179	0.7085	0.9861	0.9925	0.9249	0.8677	1.0528	1.4744	0.9007	0.5663	1.1074	0.9594	1.5177	1.2591	1.9475	1.0075	0.9429	0.968	0.9554	1.2323	0.6933	2.0911	1.0509	1.0123	1.1755	1.1292	1.211
1769	13-HODE + 9-HODE	Lipid	Fatty Acid, Monohydroxy	37752	LC/MS Neg	100002196	5275	295.228	43013				0.8334	0.9057	1.1759	0.463	5.0701	1.0854	0.936	2.3836	1.5973	1.1057	2.725	1.6779	0.8596	0.2943	0.5081	0.6807	2.1779	0.7388	2.2733	0.6354	0.3208	1.6244	0.621	0.7862	0.3273	1.064	2.5369
1905	oleoyl ethanolamide	Lipid	Endocannabinoid	38102	LC/MS Neg	1137	6450	324.291	5283454	11-58-0;111-58-0		HMDB02088	0.5969	1.5675	0.4213	0.8315	0.7256	1.4775	0.7081	0.533	0.6411	1.1103	0.7052	1.072	0.7689	0.5667	0.6806	1.1036	1.0315	2.2644	0.9685	1.2879	0.6757	2.2468	1.208	1.1358	1.1539	1.2177	1.4007
2904	4-cholesten-3-one	Lipid	Sterol	38125	LC/MS Pos Late	100002227	2520	385.346	91477	601-57-0	C00599	HMDB00921	0.8953	1.0101	0.8982	0.9899	1.2137	0.5028	0.7155	0.7954	1.261	3.3982	1.0306	1.0837	1.0982	0.8239	0.5779	0.9634	0.8658	0.9291	0.6979	1.1763	1.4206	1.5146	1.2013	1.3809	1.4989	1.1608	0.8469
374	S-methylmethionine	Amino Acid	Methionine, Cysteine, SAM and Taurine Metabolism	38127	LC/MS Pos Early	100002183	2555	164.074	458	3493-12-07	C05319	HMDB38670	0.3135	1.609	0.2641	0.2641	0.2641	0.2641	0.8117	3.0819	1.2866	0.2641	0.9084	0.2641	1	0.2641	0.2641	0.2641	1.3125	0.2641	0.77	0.647	0.2641	0.2641	0.2641	0.2881	0.2641	6.3533	1.0358
3011	16a-hydroxy DHEA 3-sulfate	Lipid	Androgenic Steroids	38168	LC/MS Neg	100002126	4240	383.153					0.9712	0.6086	0.4466	2.4463	0.1487	1.4881	0.5619	0.8438	1.0012	1.8855	1.2457	0.7718	1.0075	4.3828	0.9388	2.9079	0.9988	0.3189	1.5778	2.5377	0.4695	1.2522	1.3072	1.1949	2.5632	1.1952	0.3203
2927	pregnenolone sulfate	Lipid	Pregnenolone Steroids	38170	LC/MS Neg	100002129	5100	395.19	105074	1247-64-9		HMDB00774	3.0147	0.8637	1.1851	0.8275	0.2119	0.8844	1.3748	1.6599	0.7493	1.066	0.5181	0.2952	0.6637	3.6215	0.8456	2.2042	1.7457	0.1846	0.1846	1	0.9877	0.714	1.6989	1.6451	1.5682	0.565	5.2562
1661	cis-4-decenoylcarnitine (C10:1)	Lipid	Fatty Acid Metabolism (Acyl Carnitine, Monounsaturated)	38178	LC/MS Pos Late	100002259	1057	314.233		98930-66-6			0.5752	0.6971	0.9622	0.8673	1.3061	1.1616	0.8191	1.2201	0.7926	1.1312	0.3928	0.9089	1.5027	1.8778	1.2049	1.6816	1.0378	2.0294	2.0771	1.3352	0.9197	1.0561	0.9398	0.8146	1.4137	0.9093	0.8932
4276	2,3-dihydroxyisovalerate	Xenobiotics	Food Component/Plant	38276	LC/MS Polar	100002417	1050	133.051	677	1756-18-9	C04039	HMDB12141	1.0588	0.6655	1	0.7195	2.4727	0.3059	0.8884	1.3956	1.5611	2.3724	17.8447	1.0644	2.6818	0.7158	0.9326	0.4132	0.378	1.2011	0.3519	0.3059	0.8889	0.4662	0.9082	0.759	3.2371	6.7989	0.7678
1459	(12 or 13)-methylmyristate (a15:0 or i15:0)	Lipid	Fatty Acid, Branched	38293	LC/MS Neg	100002344	5499	241.217	151014	2485-71-4			0.5692	1.0352	0.639	0.5692	0.9674	1.2458	1.1772	0.8859	1.0326	0.8862	0.6778	0.5976	1.8541	0.6027	0.7225	0.8871	1.1138	3.612	0.7262	1.1472	1.0833	1.6896	1.0662	0.861	0.5692	0.8928	1.9573
1466	(16 or 17)-methylstearate (a19:0 or i19:0)	Lipid	Fatty Acid, Branched	38296	LC/MS Neg	100002356	5993	297.28	3083779	2724-59-6		HMDB37397	0.4071	1.0421	0.7033	0.9662	1.2093	1.4094	0.7444	0.8831	0.8704	1.6278	0.5481	0.6948	1.0338	0.7701	0.7455	1.3157	0.9051	1.9144	1.1358	1.19	1.4219	1.7223	0.6927	0.8321	1.0675	1.2844	1.6438
5013	metformin	Xenobiotics	Drug - Metabolic	38306	LC/MS Pos Early	100002405	2817	130.109	4091	1115-70-4	C07151	HMDB01921	0.5466	1.1821	0.5466	0.5466	0.5466	0.5466	0.5466	0.9734	0.5466	0.5466	0.5466	0.5466	0.5466	0.5466	1.0266	0.5466	0.5466	0.5466	0.5466	0.5466	0.5466	0.5466	0.5466	0.5466	0.5466	0.5466	0.5466
1794	12,13-DiHOME	Lipid	Fatty Acid, Dihydroxy	38395	LC/MS Neg	62	5137	313.238	10236635	263399-35-5	C14829	HMDB04705	1.2835	0.5771	0.5067	0.8435	1.4772	1.2526	1.0601	0.9322	1.4196	1.7746	0.7327	0.5822	0.9917	0.5167	0.5067	0.7445	0.6112	1	0.6304	1.4132	0.8622	1.9741	1.2387	1.0015	1.2091	1.0498	0.9774
1795	9,10-DiHOME	Lipid	Fatty Acid, Dihydroxy	38399	LC/MS Neg	179	5180	313.238	9966640	263399-34-4	C14828	HMDB04704	0.6733	0.463	0.463	0.8837	1.6537	1.6116	1.6942	3.8587	1.5229	3.0678	0.8177	0.7213	1.133	0.8004	0.4687	0.6224	0.5142	0.543	0.6957	1.0881	1.1033	1.8396	1	0.7403	1.1549	1.0497	0.7385
5002	ranitidine	Xenobiotics	Drug - Gastrointestinal	38595	LC/MS Pos Early	100002735	2910	315.149	3001055	66357-59-3	D00422	HMDB01930	0.3756	0.3756	0.3756	0.3756	0.3756	0.3756	0.3756	0.3756	0.3756	0.3756	0.3756	0.3756	0.3756	0.3756	0.3756	0.3756	0.3756	0.3756	0.3756	0.3756	1.6244	0.3756	0.3756	0.3756	0.3756	0.3756	0.3756
5006	omeprazole	Xenobiotics	Drug - Gastrointestinal	38600	LC/MS Neg	100002725	4673	344.107	4594	73590-58-6	C07324	HMDB01913	1	1	1	1	1	1	1	1	1	1	1	1	1	1	1	1	1	1	1	1	1	1	1	1	1	1	1
1909	stearoyl ethanolamide	Lipid	Endocannabinoid	38625	LC/MS Pos Late	100002254	1787	328.321	27902	111-57-9		HMDB13078	0.4798	1.256	0.7473	0.9206	0.9897	0.9869	0.834	0.9675	1.0103	2.0041	0.8062	0.9366	1.0989	0.5905	0.62	1.0332	1.0774	1.6471	0.6778	1.0186	0.9738	1.5439	1.2055	1.017	1.1075	1.1535	1.0747
4359	cinnamoylglycine	Xenobiotics	Food Component/Plant	38637	LC/MS Neg	100002253	3127	204.067	709625	16534-24-0		HMDB11621	0.9734	1.1846	0.2055	1.8552	0.5005	5.0013	0.6716	0.6977	1.5488	0.0958	0.0958	0.7795	0.958	0.0958	0.0958	4.591	1.6004	0.8913	6.0846	1.4403	0.3561	3.5151	0.0958	0.0958	0.8784	1.4435	1.981
4167	hydroxycotinine	Xenobiotics	Tobacco Metabolite	38661	LC/MS Pos Early	100002717	2030	193.097	10219774	34834-67-8		HMDB01390	0.0315	0.0315	0.0315	0.0315	0.0315	0.0315	0.0315	0.0315	0.0315	2.0491	0.0315	0.0315	0.0315	1	0.0315	0.0315	0.0315	0.0315	0.0315	0.0315	2.4593	0.0315	0.0315	0.0315	0.0541	0.0315	0.0315
4168	cotinine N-oxide	Xenobiotics	Tobacco Metabolite	38662	LC/MS Pos Early	100002719	1377	193.097	9815514	36508-80-2		HMDB01411	0.1732	0.1732	0.1732	0.1732	0.1732	0.1732	0.1732	0.1732	0.1732	0.8995	0.1732	0.1732	0.1732	1.6319	0.1732	0.1732	0.1732	0.1732	0.1732	0.1732	1.1005	0.1732	0.1732	0.1732	0.1732	0.1732	0.1732
50	gamma-carboxyglutamate	Amino Acid	Glutamate Metabolism	38754	LC/MS Pos Early	100002679	903	192.05	40772	56271-99-9		HMDB41900	0.9416	0.8264	0.9642	0.7844	0.9926	0.9486	1.0473	1.2294	0.9021	0.809	0.9355	1.0788	1.1081	1.2109	0.9126	1.0074	1.0328	1.4351	1.0579	0.8566	0.822	1.1801	1.223	1.0571	1.1537	1.1041	0.9632
1462	(14 or 15)-methylpalmitate (a17:0 or i17:0)	Lipid	Fatty Acid, Branched	38768	LC/MS Neg	100002945	5695	269.249	17903417				0.5371	1.1024	0.6035	0.8234	1.3871	1.7138	1.0116	0.8681	0.8987	1.5597	0.6308	0.8527	1.5243	0.8575	0.7675	1.1999	0.85	3.311	0.8972	1.5038	1.62	2.9062	0.9884	0.8746	1.3818	1.3661	2.247
3142	glycoursodeoxycholate	Lipid	Secondary Bile Acid Metabolism	39379	LC/MS Neg	100002911	5033	448.307	12310288	64480-66-6		HMDB00708	1.3078	0.2135	3.0153	1.6371	0.3862	0.2891	1.9475	1.0918	1.7497	1.1949	0.2898	0.7991	0.5969	1.3207	2.5254	0.9082	0.2699	0.2034	0.4384	0.2003	1.3625	1.2476	8.5285	8.1057	0.5518	0.4686	0.4656
393	S-methylcysteine	Amino Acid	Methionine, Cysteine, SAM and Taurine Metabolism	39592	LC/MS Neg	100002749	880	134.028	24417	1187-84-4		HMDB02108	1.242	1.2874	0.7476	0.8362	0.9859	1.0195	0.9225	2.4768	1.4545	0.8355	0.356	0.6536	1.4659	1.3557	1.1117	1.0916	0.534	0.8882	2.06	1.1865	0.8269	0.9434	0.9135	0.8145	0.6297	1.5676	0.8303
4061	3-hydroxyhippurate	Xenobiotics	Benzoate Metabolism	39600	LC/MS Neg	100002122	1687	194.046	450268	1637-75-8		HMDB06116	0.7979	1.2163	1.7401	1	0.5311	1.0115	0.8456	0.0939	2.7007	0.0901	3.6667	0.5842	2.0939	5.0466	0.3213	1.981	0.698	1.2465	1.3431	0.5915	4.5399	0.0901	0.4311	0.4607	0.7149	0.808	0.5602
1526	eicosanedioate (C20-DC)	Lipid	Fatty Acid, Dicarboxylate	39831	LC/MS Neg	100002951	5200.9	341.27	75502	2424-92-2			3.3519	0.7215	1.0376	1.2896	0.9953	0.4984	0.9747	0.822	0.6295	1.0047	0.6815	1.0408	1.3554	1.1326	0.6371	0.8824	1.4873	1.066	0.931	1.7272	1.4444	0.8251	0.8442	0.6434	1.9155	0.9092	1.3564
1528	docosadioate (C22-DC)	Lipid	Fatty Acid, Dicarboxylate	39837	LC/MS Neg	100002952	5291.8	369.301	244872	505-56-6	C19625		4.7729	0.9455	0.5301	1.3761	1.0302	0.4577	1.132	1.143	0.6346	0.9891	0.9081	0.6517	1.3606	1.0109	1.1486	0.9848	2.0924	0.5918	0.6344	1.1766	1.3783	0.843	0.4648	0.5392	1.9291	0.9771	1.1254
942	valylleucine	Peptide	Dipeptide	39994	LC/MS Pos Early	100003210	3138	231.17	352039	22906-55-4		HMDB29131	1.3412	0.5403	0.5403	1.9705	0.5403	0.7029	0.5403	0.5403	0.917	0.5403	0.8735	0.5403	1.2748	0.6599	1.395	0.949	0.5403	1.2219	0.8024	0.8182	0.5403	0.5403	1.4431	1.1706	1.7476	1.2037	0.696
56	carboxyethyl-GABA	Amino Acid	Glutamate Metabolism	40007	LC/MS Pos Early	100003260	2085	176.092	2572	4386-03-02		HMDB02201	0.9377	1.0473	0.8883	1.1967	0.927	0.7242	1.1931	1	0.6298	0.8663	1.4038	0.1484	1.4108	0.8105	1.1468	0.6753	1.0673	1.1647	0.7451	0.8302	0.1484	0.8619	1.3483	1.2746	1.0536	1.0926	0.9601
1488	4-hydroxy-2-oxoglutaric acid	Lipid	Fatty Acid, Dicarboxylate	40062	LC/MS Polar	100002537	3073	161.009	599	1187-99-1	C01127	HMDB02070	1.1797	1.2463	0.956	1.0345	1.1627	0.9929	1.0271	1.0689	1.0071	1.3247	1.2428	0.9679	0.9221	0.7922	0.8458	1.171	0.8896	0.9427	0.9451	0.8225	1.3538	0.8299	0.4001	0.378	0.2061	1.0216	1.4411
1985	trimethylamine N-oxide	Lipid	Phospholipid Metabolism	40406	LC/MS Pos Early	100003397	2100	76.0757	1145	1184-78-7	C01104	HMDB00925	1.3065	1.1773	0.93	1.2139	1.1789	1.1523	0.6339	0.762	0.5326	20.6638	1.1788	0.6591	1.0003	0.9518	0.3297	0.7528	1.8201	0.676	1.521	2.3526	0.5512	1.4287	0.626	0.6232	0.6986	0.9988	1.7422
3935	N1-Methyl-2-pyridone-5-carboxamide	Cofactors and Vitamins	Nicotinate and Nicotinamide Metabolism	40469	LC/MS Pos Early	100001468	1250	153.066	69698	701-44-0	C05842	HMDB04193	1.1547	0.6337	0.9444	0.8912	0.5834	0.9991	1.2293	0.4963	1.2484	1.1984	1.5205	1.4566	0.861	0.4111	0.9554	0.8272	1.3138	1.0009	0.7602	1.9227	0.9366	1.2129	1.5516	1.3821	1.3457	1.017	1.0521
73	hydantoin-5-propionate	Amino Acid	Histidine Metabolism	40473	LC/MS Polar	100002514	2080	171.041	782	5624-26-0	C05565	HMDB01212	1.2391	1.5964	1.4212	0.2261	0.9912	0.3096	2.1175	1.1393	1.2642	3.589	2.5763	1.9972	1.5271	0.3819	0.5385	0.2261	0.4286	0.9913	0.923	1.0087	0.2261	0.9325	2.4403	2.6427	0.5567	0.7407	0.537
48	4-hydroxyglutamate	Amino Acid	Glutamate Metabolism	40499	LC/MS Pos Early	100002544	1141	164.055	439902	2485-33-8	C03079	HMDB01344	0.8742	0.3689	0.3689	0.4466	1.4494	0.8862	0.3689	1.1496	0.3689	2.0337	1.2997	0.3689	0.8458	1.9282	2.98	0.3689	1	0.3689	0.3689	0.3689	0.6985	0.4001	0.4267	0.3689	2.3863	2.152	0.3689
1326	butyrate (4:0)	Lipid	Short Chain Fatty Acid	40605	LC/MS Neg	1143	1062	87.0452	264	109-92-6	C00246	HMDB00039	0.6839	1.0215	0.584	0.5666	1.7997	0.6457	0.6576	0.7335	1.7006	1.5161	0.9386	0.9856	0.5216	0.5115	0.2273	1.6901	1.1297	0.7999	1.2259	1.2782	1.1153	1.7284	1.4893	0.2273	1	0.2273	1.4354
856	prolylglycine	Peptide	Dipeptide	40703	LC/MS Pos Early	100003674	2136	173.092	6426709	2578-57-6		HMDB11178	1.4677	0.4691	0.4691	0.4691	1.1601	0.4691	0.4691	4.4344	1	1.8592	3.4598	0.4691	0.6618	0.7944	0.6409	0.4691	0.4691	0.912	0.5287	0.4691	0.4691	0.4691	0.6735	0.7011	1.5173	0.6575	0.4691
2967	pregnanediol-3-glucuronide	Lipid	Progestin Steroids	40708	LC/MS Neg	100003470	5145	495.296	123796	1852-49-9		HMDB10318	1.3156	0.8409	5.1037	1.7172	0.1786	1.004	0.996	0.8704	1.1848	0.1786	0.1786	0.7194	0.3262	0.6055	0.334	2.93	16.2619	0.2965	1.0545	0.9419	1.3641	1.3161	0.3614	0.3732	1.2266	0.2184	19.1504
76	imidazole propionate	Amino Acid	Histidine Metabolism	40730	LC/MS Pos Early	100003434	2263	141.066	70630	1074-59-5		HMDB02271	1.0662	2.255	1.6335	0.5347	1.2987	0.3393	0.4783	2.0394	1	1.4565	0.9159	0.4316	1.3415	4.9398	10.5557	0.6763	1.1063	0.498	0.3489	0.9617	1.422	0.4797	1.8591	1.915	2.0507	0.9869	0.3393
4040	retinal	Cofactors and Vitamins	Vitamin A Metabolism	40807	LC/MS Pos Late	100004088	1666	285.221	638015		C00376	HMDB01358	1.7684	1.3339	0.8792	0.9272	0.7327	1	0.9532	0.8533	1.4407	1.1572	1.2127	0.8154	1.1668	0.9425	0.6613	1.3449	1.1972	0.7161	0.7546	0.6613	1.5471	0.845	0.9903	0.9842	1.5753	1.5313	1.9984
4322	alliin	Xenobiotics	Food Component/Plant	41494	LC/MS Pos Early	100003473	1470	178.053	87310	556-27-4	C08265	HMDB33592	2.5564	1.2741	0.4629	0.2878	0.841	1	1.4812	1.4624	2.6524	1.1093	3.0049	0.325	12.0983	2.1042	0.686	0.9138	0.3683	0.2044	5.9989	1.0785	1.2346	0.8207	0.5455	0.5284	0.2044	6.6469	0.3305
4012	heme	Cofactors and Vitamins	Hemoglobin and Porphyrin Metabolism	41754	LC/MS Pos Late	100001386	1124	616.176	26945	14875-96-8	C00032	HMDB03178	2.4718	0.4076	1.9834	0.7569	0.9514	0.8276	0.5651	0.9072	1.0087	1.8207	0.3417	0.9564	1.3059	0.81	1.3071	1.5747	3.8279	1.5548	0.9913	1.2135	0.4613	0.3578	1.102	2.2005	1.3016	8.7729	8.6266
5332	succinimide	Xenobiotics	Chemical	41888	LC/MS Polar	100003696	2155	116.035	11439	123-56-8	C07273		1.0011	2.2165	1.7332	1.4474	1.2948	0.6241	1.1743	0.5563	0.9299	0.6137	0.5288	1.377	1.5373	1.4008	0.7101	0.9401	0.766	0.7867	1.3142	0.8558	1.3277	0.996	0.9403	0.7214	1.3057	1.2511	1.5169
401	lanthionine	Amino Acid	Methionine, Cysteine, SAM and Taurine Metabolism	42002	LC/MS Pos Early	100003892	1730	209.059	98504	3183-08-02			2.5871	0.9198	0.701	0.8758	0.8133	0.5701	1.5549	1.182	0.99	0.9347	1.2603	1.0959	1.7229	1.0619	1.7059	0.9503	1.1279	0.6983	1.1556	0.7148	0.701	0.9567	2.2817	1.9168	1.01	0.8236	0.8934
5130	fexofenadine	Xenobiotics	Drug - Respiratory	42021	LC/MS Pos Late	100004018	944	502.295	3348	83799-24-0	C06999	HMDB05030	1	1	1	1	1	1	1	1	1	1	1	1	1	1	1	1	1	1	1	1	1	1	1	1	1	1	1
272	indoleacetylglutamine	Amino Acid	Tryptophan Metabolism	42087	LC/MS Pos Early	100001731	2185	304.129	25200879			HMDB13240	1	2.1786	0.3345	1.6091	0.3345	1.2488	0.4001	0.8579	0.7989	0.3345	0.9032	0.3345	1.588	0.6469	0.7083	0.8424	5.0477	0.7426	1.6736	0.3345	0.3345	0.3345	1.1099	1.0859	1.9351	3.6826	0.3797
1620	N-palmitoylglycine	Lipid	Fatty Acid Metabolism (Acyl Glycine)	42092	LC/MS Neg	100003686	5580	312.254	151008	2441-41-0		HMDB13034	0.6396	1.2072	0.6396	1.0154	1.0639	1.2232	0.6396	0.8685	0.9662	0.7434	0.6396	0.7163	0.9846	0.6396	0.6396	1.5763	1.088	1.3182	1.5916	0.9417	1.1059	2.0737	0.8713	0.8344	0.7753	1.241	0.8453
1310	phosphate	Energy	Oxidative Phosphorylation	42109	LC/MS Pos Early	461	576	98.9842	1061	7664-38-2	C00009	HMDB01429	1.1737	0.8604	0.7601	1.0882	1.0305	1.0073	0.7866	0.9764	0.6818	1.002	0.7094	0.8053	0.5876	1.0791	1.0729	0.8338	0.6975	1.0786	1.0395	1.0383	1.0766	1.3339	0.8769	0.9403	0.998	0.9647	0.8725
60	S-1-pyrroline-5-carboxylate	Amino Acid	Glutamate Metabolism	42370	LC/MS Pos Early	35	1528	114.055	1196	2906-39-0	C04322	HMDB01301	1.0214	1.4711	0.2286	1.008	0.9068	0.9014	0.3959	2.1348	0.8622	0.9875	1.4169	0.2286	1	1.4723	0.2286	1.0474	0.8151	0.2286	1.1961	0.7197	1.3093	0.6587	0.6064	0.5012	0.9287	0.853	1.8861
500	2-aminobutyrate	Amino Acid	Glutathione Metabolism	42374	LC/MS Pos Early	1128	2059	104.071	439691	1492-24-6	C02261	HMDB00650	1.394	1.3539	0.668	0.983	1.232	1.3792	1.0407	1.18	0.6208	1.5006	0.9001	0.8158	0.9201	1.4848	1.4383	1.0439	0.7627	0.8767	0.7067	0.9515	1.1096	0.7084	0.9116	0.9117	1.3972	1.017	1.2189
382	S-adenosylhomocysteine (SAH)	Amino Acid	Methionine, Cysteine, SAM and Taurine Metabolism	42382	LC/MS Neg	197	1832.4	383.114	439155	979-92-0	C00021	HMDB00939	1.1524	1.0015	0.5446	0.5446	0.5446	0.5446	0.7021	0.7968	0.5446	0.798	0.5446	0.5446	1.1207	0.5446	1	1.0718	0.8173	1.0867	0.8169	0.5446	0.5446	1.0059	0.9027	0.5446	1.1461	0.5446	1.2079
1275	erythronate*	Carbohydrate	Aminosugar Metabolism	42420	LC/MS Polar	100001320	2186	135.03	2781043	88759-55-1		HMDB00613	1.1944	1.2834	0.9753	1.021	0.9925	0.7527	0.9097	1.142	0.8615	1.1329	0.9884	0.6871	1.2907	1.1154	2.0451	0.8999	0.8275	1.1742	0.8646	0.7327	0.91	1.2409	0.997	0.985	1.0578	1.003	0.6847
1732	2-hydroxydecanoate	Lipid	Fatty Acid, Monohydroxy	42489	LC/MS Neg	100004089	4840	187.134	21488	5393-81-7			1.4073	1.1733	0.7139	1.774	1.4151	0.7163	1.3945	2.0536	1.2685	1.3819	0.9902	0.4736	1.531	0.577	0.6055	0.613	0.9962	1.0354	0.5782	0.8598	0.71	1.0038	0.8063	0.824	0.9748	0.7104	1.4689
3153	glycohyocholate	Lipid	Secondary Bile Acid Metabolism	42574	LC/MS Neg	100004083	5020	464.302					1.2507	0.4098	3.4273	0.4098	0.6584	0.9748	1.2672	0.813	1.4808	0.5753	1.0252	0.4098	1.4976	0.9639	0.7419	1.9997	0.4098	0.4098	2.1507	0.4098	0.698	0.4098	0.5432	0.4098	0.5142	0.4098	0.5055
407	N-methyltaurine	Amino Acid	Methionine, Cysteine, SAM and Taurine Metabolism	42989	LC/MS Polar	100004056	1650	138.023	7882	107-68-6			0.6672	0.7152	0.8951	0.1605	3.926	1.7773	0.376	0.1605	0.9755	0.1605	1.9248	1.0245	1.9174	1.0649	0.1605	0.492	0.4394	2.815	4.2903	2.2978	0.1605	1.4159	0.1605	0.1605	0.6104	3.153	0.2702
124	6-oxopiperidine-2-carboxylate	Amino Acid	Lysine Metabolism	43231	LC/MS Neg	100004499	965	142.051	3014237	34622-39-4		HMDB61705	1.2484	1.2567	1.482	1.1479	0.9908	0.4502	0.9906	2.4303	0.9216	2.2425	1.5023	2.0482	0.7548	1.0798	0.727	0.8388	0.6113	1.0358	1.362	2.0041	0.8298	1.1679	1.2499	1.0092	0.6276	0.8269	0.6895
4530	S-allylcysteine	Xenobiotics	Food Component/Plant	43239	LC/MS Pos Early	100004509	2690	162.058	98280	21593-77-1		HMDB34323	2.0724	1.8109	0.9567	0.6237	1.0007	0.9993	1.8236	0.7605	2.167	9.3501	1.9469	0.2115	2.53	1.6445	0.6207	1.2995	0.3559	0.2765	1.8413	1.1236	1.0252	0.6562	0.2834	0.2841	0.0559	3.4332	0.3647
436	N-delta-acetylornithine	Amino Acid	Urea cycle; Arginine and Proline Metabolism	43249	LC/MS Neg	100004523	858	173.093	9920500				2.0917	0.7406	0.5406	0.6385	1.7387	0.476	0.409	1.2628	1.4508	1.0221	0.9779	1.4662	1.5513	2.4473	3.2382	0.3341	0.5562	0.5653	1.6522	0.6949	2.2753	0.3136	0.4394	0.42	0.3586	1.2448	0.3764
72	N-acetyl-1-methylhistidine*	Amino Acid	Histidine Metabolism	43255	LC/MS Pos Early	100004299	2100	212.103	53859791				0.9521	0.633	0.633	1.0136	0.633	0.633	2.5326	0.633	0.633	0.633	0.8277	0.7398	0.7637	1	0.633	0.633	1.0547	0.8763	0.633	1.4021	0.633	4.0874	1.0657	1.1301	1.4397	0.8284	0.633
476	acisoga	Amino Acid	Polyamine Metabolism	43258	LC/MS Neg	100004541	2297	183.114	129397	106692-36-8			0.6664	2.2254	0.7862	0.7242	1.026	1.1849	1.532	0.8606	0.8086	0.9442	0.4342	0.4855	1.1464	1.0099	1.3223	1.4853	1.9696	1.1774	1.6313	1.7573	1.3443	1.7394	0.6756	0.7546	1.088	0.5676	0.9901
1695	(R)-3-hydroxybutyrylcarnitine	Lipid	Fatty Acid Metabolism (Acyl Carnitine, Hydroxy)	43264	LC/MS Pos Early	100003926	2400	248.149	53481617			HMDB13127	0.2719	4.0614	0.2719	0.2719	1.3796	1.0422	0.2719	1.3144	0.2719	3.3178	0.2719	0.2719	0.4846	1.2111	0.2719	0.2719	0.2719	1.4417	0.568	0.4554	0.2719	0.7458	0.2719	0.2719	0.4425	0.2719	0.9578
5245	2-aminophenol sulfate	Xenobiotics	Chemical	43266	LC/MS Neg	100004322	1677	188.002	181670			HMDB61116	1.232	4.4899	0.1686	8.0073	0.43	0.4501	2.4433	2.1181	5.1972	0.2023	1.8333	0.9333	7.671	0.2084	1.883	0.2448	1.0667	5.3669	0.2642	3.5724	0.1136	0.9062	0.867	0.8615	0.184	0.518	4.3721
1579	2-aminooctanoate	Lipid	Fatty Acid, Amino	43343	LC/MS Pos Late	100004227	750	160.133	69522	644-90-6		HMDB00991	3.1259	1.605	0.5482	1.1609	1.3394	0.4509	1.0296	1.0848	0.4426	1.0228	0.4091	0.5125	1.7849	0.9772	2.0639	0.7948	0.5782	1.3484	0.5626	0.4653	0.9502	0.3115	0.3091	0.2849	1.8872	0.886	1.5679
4439	indolin-2-one	Xenobiotics	Food Component/Plant	43374	LC/MS Pos Early	100004318	2575	134.06	321710	59-48-3	C12312		2.3272	2.1666	0.504	0.3533	0.7109	0.4758	0.4756	0.9329	1.1676	0.2467	0.2467	0.6466	0.2467	2.9528	0.2467	2.0568	1	0.3504	1.0382	0.9726	1.211	2.184	0.4041	0.4187	2.2527	0.4061	1.4055
394	S-methylcysteine sulfoxide	Amino Acid	Methionine, Cysteine, SAM and Taurine Metabolism	43378	LC/MS Pos Early	100002927	900	152.038	82142	6853-87-8		HMDB29432	1.0954	1.0022	0.7436	0.9024	1.413	1.2583	0.9855	3.2509	1.299	0.6661	0.3534	0.9978	1.2995	2.107	1.8234	0.9282	0.3759	0.8587	2.0667	0.9479	0.7626	1.1504	0.8907	0.8303	0.5721	1.6998	0.6959
4184	2-piperidinone	Xenobiotics	Food Component/Plant	43400	LC/MS Pos Early	100004295	1675	100.076	12665	675-20-7		HMDB11749	1.9792	2.9153	1.2088	2.0264	1.8161	0.9129	1.4881	0.7127	0.9944	0.815	0.1933	0.0929	0.6194	1.7991	1.2371	0.3681	1.0669	0.404	0.9639	1.1714	2.0825	0.9514	1.0062	1.0056	1.8868	3.3998	0.317
5290	dimethyl sulfone	Xenobiotics	Chemical	43424	LC/MS Pos Early	100004284	832	95.0161	6213	67-71-0	C11142	HMDB04983	0.2577	1.8883	0.2577	3.0246	0.2577	0.2577	0.2577	2.3243	2.4979	0.2577	0.2577	0.6929	0.7063	0.2577	0.2577	0.5527	1.6041	0.2577	1.7474	1.0699	0.2577	0.2577	0.4594	0.9144	0.7619	0.2577	1.0271
4170	3-hydroxycotinine glucuronide	Xenobiotics	Tobacco Metabolite	43470	LC/MS Neg	100004494	1745	367.115	183115	132929-88-5		HMDB01204	0.5926	0.5926	0.5926	0.5926	0.5926	0.5926	0.5926	0.5926	0.5926	1	0.5926	0.5926	0.5926	0.5926	0.5926	0.5926	0.5926	0.5926	0.5926	0.5926	1.1415	0.5926	0.5926	0.5926	0.5926	0.5926	0.5926
81	N-acetylcarnosine	Amino Acid	Histidine Metabolism	43488	LC/MS Neg	100004046	1235	267.11	9903482	56353-15-2		HMDB12881	3.1144	1.2138	0.621	0.4929	0.7875	0.4728	0.8007	1.5555	1.1379	0.6924	1.9112	0.2698	1.6647	0.7828	0.8621	1.3913	0.8502	1.1983	0.5451	0.6991	0.4179	0.6176	1.5047	1.2833	1.3263	1.2264	0.6189
77	formiminoglutamate	Amino Acid	Histidine Metabolism	43493	LC/MS Pos Early	100002500	1880	175.071	439233	816-90-0	C00439	HMDB00854	2.1638	1.882	0.9292	0.5851	1.0505	0.5465	0.7396	1.5267	0.8515	3.3326	2.88	2.2116	2.0425	0.9661	0.8652	0.6113	0.8283	1.1392	0.3221	0.8646	0.4609	0.6334	1.5203	1.5646	1.3682	1.7944	0.4547
3166	3b-hydroxy-5-cholenoic acid	Lipid	Secondary Bile Acid Metabolism	43507	LC/MS Neg	100004182	5205	373.275	92997	5255-17-4		HMDB00308	2.1581	1.9338	1	1.3953	0.7588	0.7588	0.7588	0.8272	1.704	0.7588	0.7588	0.7588	1.4384	0.7588	0.7588	0.9694	0.8208	0.7588	0.7588	0.7588	0.7588	0.7588	1.0663	0.8805	0.9398	0.7588	1.892
126	N-acetyl-cadaverine	Amino Acid	Lysine Metabolism	43530	LC/MS Pos Early	100002249	2385	145.133	189087	32343-73-0		HMDB02284	0.4611	1.2653	0.3623	0.5398	0.3623	1.7202	0.3623	1.1743	0.3623	0.4766	0.3623	0.3623	0.9944	3.6247	0.3623	0.6541	6.8458	0.4592	0.3623	0.6544	0.3623	2.9766	0.7303	1	1.7811	2.8384	0.4332
246	N-formylanthranilic acid	Amino Acid	Tryptophan Metabolism	43549	LC/MS Polar	100004561	900	164.035	101399	3342-77-6	C05653	HMDB04089	1.3075	1.4403	1.093	0.7871	0.5921	0.6646	0.887	1.076	1.665	0.5299	1.269	0.9422	0.8449	0.991	0.7557	0.5299	0.5299	0.7855	0.9201	1.0357	0.7736	0.9026	1.0094	1.009	1.6084	0.5812	1.0582
5016	ketopioglitazone	Xenobiotics	Drug - Metabolic	43579	LC/MS Neg	100004176	4165	369.091		146062-45-5			1	1	1	1	1	1	1	1	1	1	1	1	1	1	1	1	1	1	1	1	1	1	1	1	1	1	1
5017	hydroxypioglitazone (M-IV)	Xenobiotics	Drug - Metabolic	43580	LC/MS Pos Late	100004177	665	373.122		146062-44-4			1	1	1	1	1	1	1	1	1	1	1	1	1	1	1	1	1	1	1	1	1	1	1	1	1	1	1
112	5-(galactosylhydroxy)-L-lysine	Amino Acid	Lysine Metabolism	43582	LC/MS Pos Early	100002462	2755	325.161	123986	32448-36-5			1.556	0.4108	0.5528	1.1284	0.1852	1.0344	0.9838	1.013	0.8882	0.9775	0.987	0.6645	1.5595	1.0802	0.9389	0.8286	0.8528	1.6343	1.2913	1.1887	0.8992	1.3564	1.1189	1.463	1.6462	1.1724	1.4885
1574	2-aminoheptanoate	Lipid	Fatty Acid, Amino	43761	LC/MS Pos Early	100004542	3160	146.118	227939	1115-90-8			1.1047	1.4946	0.7614	1.0922	0.5757	0.4747	0.9257	1.1554	0.6057	1.4716	0.8014	0.5778	2.3862	1.8547	1.0489	1.1947	0.5847	1.2024	0.9869	0.6932	0.8814	1.6029	1.3577	1.2848	0.8818	0.9442	1.0131
455	guanidinoacetate	Amino Acid	Creatine Metabolism	43802	LC/MS Polar	344	2884	116.047	763	352-97-6	C00581	HMDB00128	0.9227	0.9273	1.0838	0.8699	0.5646	1.2111	0.774	0.6486	1.7681	0.843	1.1076	0.6889	1.4065	0.983	0.7327	1.2651	0.7066	1.1212	1.2157	0.7917	1.1888	1.0049	0.8955	0.8391	1.5145	1.548	1.2312
4013	bilirubin	Cofactors and Vitamins	Hemoglobin and Porphyrin Metabolism	43807	LC/MS Pos Late	1090	1840	585.271	5280352	635-65-4	C00486	HMDB00054	0.8525	2.1095	1.5949	1.2945	1.0491	0.6418	0.9894	0.575	0.6975	0.6501	0.4795	1.308	1.5003	1.4709	0.7908	0.8207	0.7506	0.9125	1.2453	0.9946	1.116	1.259	0.8269	0.7188	1.2111	1.1129	1.1411
563	gamma-glutamylvaline	Peptide	Gamma-glutamyl Amino Acid	43829	LC/MS Pos Early	100001126	2700	247.129	7015683	2746-34-1		HMDB11172	1.3274	1.135	1.1482	0.6455	1.1439	0.8041	0.9556	1.3014	1.0057	0.9922	1.0374	0.5674	1.067	1.5116	1.127	0.9305	0.9515	0.9943	0.7465	0.5888	0.984	0.6823	1.4751	1.4102	1.6258	1.0231	0.5888
2544	glycerol 3-phosphate	Lipid	Glycerolipid Metabolism	43847	LC/MS Pos Early	100000258	580	173.021	754	29849-82-9	C00093	HMDB00126	1.2128	1.2247	0.9676	0.8638	1.4058	1.0085	0.9392	1.0901	0.7233	1.4824	1.4263	0.889	0.8298	0.8956	1.0263	0.6903	0.7366	0.9915	0.8641	0.6955	1.2334	1.2168	0.8811	0.9598	0.8263	1.1795	1.1872
360	3-methyl-2-oxobutyrate	Amino Acid	Leucine, Isoleucine and Valine Metabolism	44526	LC/MS Neg	100000936	1465	115.04	49	3715-29-5	C00141	HMDB00019	1.0091	1.605	0.7408	0.8466	1.2444	1.0452	0.761	1.235	0.8299	1.7357	0.7955	0.7979	0.9167	1.2023	0.9554	1.0077	0.9561	0.8889	0.9144	0.7414	1.1705	1.0697	1.143	1.1256	1.2387	0.9923	0.9192
304	isovalerate (C5)	Amino Acid	Leucine, Isoleucine and Valine Metabolism	44656	LC/MS Neg	100000708	1564	101.061	10430	503-74-2	C08262	HMDB00718	1.3188	1.2151	0.8044	0.7034	0.5941	0.9496	1.6819	1.83	0.7372	2.677	0.9426	1.2261	0.6616	0.6408	0.6275	0.9951	1.1326	1.0545	0.7406	1.401	0.9092	1.4099	1.235	0.9546	1.2278	0.8543	1.0093
119	glutarylcarnitine (C5-DC)	Amino Acid	Lysine Metabolism	44664	LC/MS Pos Early	100001593	2393	276.144	71464488	102636-82-8		HMDB13130	2.6452	1.3475	0.6153	0.8291	0.9005	0.361	0.884	1.3921	1.3196	0.9094	1.1624	0.6637	1.6356	0.9255	0.361	1.3748	1.4299	1.9222	1.0506	1	0.7538	0.4721	1.1605	1.411	1.1815	0.9812	0.9696
1390	docosahexaenoate (DHA; 22:6n3)	Lipid	Long Chain Polyunsaturated Fatty Acid (n3 and n6)	44675	LC/MS Neg	100000665	5525	327.233	445580	6217-54-5	C06429	HMDB02183	0.2124	0.7865	1.7804	0.6668	1.8506	2.0804	0.995	0.8551	0.3759	1.0707	0.7468	1.1947	0.7626	1.2012	0.7885	2.1424	0.8071	1.8774	0.9707	1.3448	2.5342	1.124	0.7498	0.5413	1.4107	2.9517	1.005
1648	palmitoylcarnitine (C16)	Lipid	Fatty Acid Metabolism (Acyl Carnitine, Long Chain Saturated)	44681	LC/MS Pos Late	100000776	1425	400.342	461	6865-14-1	C02990	HMDB00222	0.655	1.2401	1.1237	1.1979	1.1387	0.8957	1.0921	1.1999	0.96	1.3764	0.7014	0.7928	2.1727	0.88	0.8674	0.783	1.0033	1.8592	0.9314	1.1593	0.8365	2.1383	0.9159	0.8039	1.5611	1.2197	1.3187
558	gamma-glutamylmethionine	Peptide	Gamma-glutamyl Amino Acid	44872	LC/MS Pos Early	100001313	2640	279.101	7009567	17663-87-5		HMDB29155	1.4372	0.6572	1.1039	0.8402	0.8122	0.8478	0.9827	0.9359	1.4496	0.9944	1.0361	0.7161	1.5764	1.2311	1.3278	1.0306	0.6888	1.0056	0.8325	0.696	1.0346	0.754	0.9887	1.0097	1.2347	1.0386	0.847
3976	gamma-CEHC	Cofactors and Vitamins	Tocopherol Metabolism	44876	LC/MS Neg	100002094	3843	263.129	133098	178167-75-4		HMDB01931	0.8129	0.7846	0.7336	1.018	3.677	0.665	0.982	0.9579	1.6918	0.5375	0.4764	1.3442	1.4441	1.3258	1.5847	0.6418	0.6507	1.4815	0.9009	0.7834	0.5461	0.5189	2.9883	2.8568	0.7684	1.0909	1.5644
375	methionine sulfone	Amino Acid	Methionine, Cysteine, SAM and Taurine Metabolism	44878	LC/MS Pos Early	100004635	1250	182.048	69961	820-10-0			1.4072	0.7174	1.1156	0.9491	1.4866	0.9289	1.9936	1.4165	0.8247	1.2769	1.1729	1.4831	1.4448	0.9242	1.7676	0.4476	0.7061	0.7389	1.3709	0.8379	0.6043	0.9387	1.0622	0.9375	0.583	0.9922	0.4719
339	2-methylbutyrylcarnitine (C5)	Amino Acid	Leucine, Isoleucine and Valine Metabolism	45095	LC/MS Pos Early	100001509	3050	246.17	6426901	31023-25-3		HMDB00378	1.1138	1.4699	1.0551	0.6449	1.6335	0.6161	0.8744	0.8203	1.4234	1.4307	1.1777	0.545	0.9975	0.9013	0.6343	1.0494	0.8889	1.0316	1.0819	0.7645	0.588	0.768	1.0025	0.9717	1.3985	0.5525	1.1177
4323	N-acetylalliin	Xenobiotics	Food Component/Plant	45404	LC/MS Pos Early	100005367	1348	220.064					0.9545	0.8345	1.3049	0.1508	0.1508	0.3417	3.1258	1.0684	1.762	6.4763	2.4376	0.5368	7.1685	2.2048	0.2894	0.7231	0.2365	0.194	1.8815	1.4561	1.0455	7.369	1.2363	0.9037	0.1508	5.0967	0.1723
5226	O-sulfo-L-tyrosine	Xenobiotics	Chemical	45413	LC/MS Neg	100005384	990	260.023	514186				0.8177	0.9978	1.1541	1.4598	0.568	1.1806	1.4084	1.1716	1.0022	0.5846	0.624	0.8029	1.5259	1.1215	0.8533	1.1428	0.5766	1.3692	1.0601	1.0537	0.7524	1.0854	0.8624	0.8134	1.241	1.1239	0.9725
4769	3-(N-acetyl-L-cystein-S-yl) acetaminophen	Xenobiotics	Drug - Analgesics, Anesthetics	45721	LC/MS Neg	2048	2094	311.071	83967	52372-86-8			0.0473	0.0473	0.0473	0.0473	0.0473	0.0473	0.0473	0.0473	0.0473	0.0473	0.2703	0.0473	0.0473	0.0473	0.0473	0.0473	0.0473	0.0473	0.0473	0.0473	1.7297	0.0473	0.0473	0.0473	0.0473	0.0473	0.0473
2419	1-oleoyl-GPG (18:1)*	Lipid	Lysophospholipid	45968	LC/MS Neg	100005716	5610	509.288					1.8653	1.0085	0.7072	1.1826	1.5441	0.4037	0.4037	0.4037	1.4758	0.4037	0.7616	0.9586	1.2856	0.7591	0.9915	0.4037	0.8757	0.4037	0.4142	0.4037	0.4037	0.4037	0.4037	0.9239	0.4037	0.4037	0.4037
2415	1-palmitoyl-GPG (16:0)*	Lipid	Lysophospholipid	45970	LC/MS Neg	100005717	5570	483.273	3300276				0.903	1.1072	1.3745	0.8698	0.9136	0.4975	0.4975	0.7957	1.1896	0.9943	1.3208	0.5792	1.7692	0.8333	1.0455	0.4975	0.7009	1	0.4975	0.8742	0.4975	0.4975	1.3376	1.3726	0.4975	0.9607	0.4975
4090	guaiacol sulfate	Xenobiotics	Benzoate Metabolism	46111	LC/MS Neg	100004208	2344	203.002	22473			HMDB60013	2.9255	1.8168	0.8528	1.343	0.9698	0.9485	0.6625	1.4187	2.9145	0.6056	0.752	2.0449	1.454	1.273	0.5141	1.002	1.147	2.0147	1.4374	0.8793	0.998	0.5892	0.7224	0.7062	1.3357	0.7858	0.4586
2937	21-hydroxypregnenolone disulfate	Lipid	Pregnenolone Steroids	46115	LC/MS Neg	100001999	3935	245.067	134595	1164-98-3			1.8118	0.9976	1.1153	1.2924	0.3895	1.5358	1.616	0.9072	1.0605	1.2187	0.8129	0.6184	0.5015	1.7459	0.8738	2.2578	1.0024	0.6229	0.4742	0.5495	0.9489	0.7252	1.453	1.4169	2.1113	0.7496	2.6803
1198	mannitol/sorbitol	Carbohydrate	Fructose, Mannose and Galactose Metabolism	46142	LC/MS Polar	100001740	2320	181.072	5780		C00794	HMDB00247	0.9582	1.8968	0.6613	1.01	2.2889	0.6458	0.779	1.1598	0.5303	1.8012	1.3997	0.8362	0.99	43.8093	1.6862	0.7614	0.6889	1.0961	1.0412	0.4473	0.6082	7.6823	3.2408	3.1495	0.7226	0.7197	0.5335
4573	methyl glucopyranoside (alpha + beta)	Xenobiotics	Food Component/Plant	46144	LC/MS Neg	100005864	1070	193.072					0.8797	0.1436	0.9988	1.1807	0.1436	0.2707	3.1199	0.7096	2.0252	0.1436	1.2115	1.3415	2.3029	0.5147	0.6542	0.1436	0.5004	0.7535	1	0.7172	1.0103	1.1339	1.711	1.7836	0.307	0.7752	0.9226
4094	4-methylcatechol sulfate	Xenobiotics	Benzoate Metabolism	46146	LC/MS Neg	100004111	2665	203.002					0.3148	2.1106	0.7035	4.425	7.8645	3.8783	0.3748	3.1801	3.0255	0.8799	0.6359	0.9293	0.0793	0.926	0.014	3.8367	1.5894	0.1574	9.712	0.7799	2.8842	0.4947	0.9405	0.8552	3.1887	4.7958	0.6308
4091	3-methyl catechol sulfate (1)	Xenobiotics	Benzoate Metabolism	46165	LC/MS Neg	100004112	2790	203.002					5.5813	2.2356	0.4297	0.6663	1.652	1.8548	0.2152	0.6337	4.7044	0.8917	0.2152	0.2152	0.9204	0.9778	0.2152	0.2152	0.4503	0.6737	1.3939	0.2152	2.306	0.5163	0.3006	0.3378	1.0982	1.3664	0.2152
2965	5alpha-pregnan-diol disulfate	Lipid	Progestin Steroids	46172	LC/MS Neg	100002015	4310	239.085	5127902				1.9851	0.8669	5.1994	0.2106	0.2106	1.4331	1.3198	0.5339	0.5369	0.2106	1.0549	1.1752	0.2106	0.9745	0.2106	1.0255	21.5065	0.2599	0.2106	0.3152	0.454	0.2368	0.2585	0.2106	1.6908	0.2106	32.464
1285	aconitate [cis or trans]	Energy	TCA Cycle	46173	LC/MS Neg	100001359	580	173.009					0.9562	1.8003	0.9531	1.2543	1.458	0.8317	0.7722	1.5178	1.1744	1.054	0.8866	0.7195	1.4553	1.055	1.3223	0.8548	0.8835	1.3553	0.8331	0.8099	0.6968	1.0723	1.1263	1.0076	1.0139	0.9006	0.7507
1672	linoleoylcarnitine (C18:2)*	Lipid	Fatty Acid Metabolism (Acyl Carnitine, Polyunsaturated)	46223	LC/MS Pos Late	100003151	1430	424.342	6450015	36816-10-1		HMDB06469	0.7137	0.7798	0.9954	1.3237	1.0911	1.1065	0.9163	1.1333	0.695	0.7977	0.3322	0.6681	1.3842	1.0276	0.8544	1.3557	1.0046	1.5533	1.3904	1.2905	0.699	2.1327	1.0961	0.9635	1.077	1.1557	0.8745
52	pyroglutamine*	Amino Acid	Glutamate Metabolism	46225	LC/MS Pos Early	100001540	1900	129.066	134508	2353-44-8			3.6295	3.4818	0.9964	0.7573	0.3	0.5809	0.6215	2.1666	0.7578	0.4916	1.4512	1.9782	2.8285	1.3271	0.9863	0.5319	0.8659	1.3215	0.9566	0.6425	0.818	0.7891	1.1508	1.1078	1.8479	1.0021	0.9979
113	fructosyllysine	Amino Acid	Lysine Metabolism	46227	LC/MS Pos Early	100005373	2784	309.166	123708	21291-40-7			0.3784	3.105	0.6288	1.0847	2.7557	1.0317	0.635	1.1279	0.9227	2.7803	1.0195	1.1065	0.9805	1.4292	1.6007	0.5706	1.3538	0.5685	0.8956	1.0505	1.2371	0.9322	0.8154	0.6637	1.5209	0.882	0.3328
	X - 21258			46259	LC/MS Neg		3915	213.023					1.0093	0.7248	4.0741	1.0604	0.9907	2.2743	0.4228	1.9195	0.2857	3.8313	0.7424	1.2346	1.569	0.337	1.8962	2.4817	0.5158	0.4309	2.1112	0.2477	0.4149	1.1141	0.3423	0.3407	0.5133	2.8732	0.571
	X - 19438			46261	LC/MS Neg		1209	217.072					1.1513	4.9382	1.4251	1.749	1.5453	1	0.1651	1.8954	1.6117	3.8532	1.9436	0.1651	1.1551	0.5177	1.4611	0.9382	0.6398	0.1651	0.3109	0.732	0.7178	0.9697	0.9291	0.8604	0.8517	0.1651	0.1651
	X - 15486			46266	LC/MS Neg		3629	269.151					2.1784	0.7346	0.4382	0.6384	1.117	1.096	1.5466	1.0069	0.7166	1.9449	1.1266	0.8659	1.0876	0.9945	1.8212	0.5991	0.5404	2.7692	0.4134	1.0055	0.3459	0.9022	1.9201	1.7975	1.4731	0.7113	0.3734
	X - 15461			46283	LC/MS Pos Early		1624	160.097					1.1805	1.3041	0.7244	1.2646	0.8619	0.6806	0.9934	1.1376	0.7212	1.1903	0.8008	0.7842	1.3482	1.5911	0.9857	0.8774	1.2562	1.1321	0.7098	0.8007	0.9364	1.5352	1.4421	1.3008	1.3619	1.0066	1.2227
	X - 21286			46295	LC/MS Neg		1550	164.036					0.9514	1.8839	0.8874	0.4546	0.9681	0.7018	0.7602	1.2312	1.4366	0.4349	0.4235	1.9562	0.9038	1.4108	0.3405	1.5562	1.6693	1.0316	1.3838	1.2877	0.7705	2.2494	0.5261	0.5154	1.3826	0.6105	1.4959
	X - 21310			46354	LC/MS Neg		2235	233.985					1.8961	1.7452	0.9599	0.3792	0.5543	0.7924	0.6808	1.3516	1.3548	0.4073	0.6138	0.8855	0.7653	2.0662	0.276	1.5199	0.8542	0.4712	1.0401	1.2935	1.4073	1.7193	0.5578	0.5257	1.8974	0.3106	1.1084
	X - 11441			46360	LC/MS Neg		3755.8	331.131					1.6816	1.5673	2.1592	1.2788	1.362	0.6644	0.9799	0.359	0.9628	0.6093	0.3869	1.7806	1.7448	1.614	0.6026	1.0685	0.8946	0.6686	1.658	0.7786	1.9133	0.854	1.0201	0.8443	1.9944	2.5034	3.2236
	X - 21319			46363	LC/MS Neg		4238.4	165.092					1.1344	0.8816	0.2416	0.9204	1.2421	2.5856	2.3661	0.9785	0.9293	1.364	1.0707	1.2891	0.7935	0.8983	2.2249	1.0798	1.0215	2.1045	0.5766	0.7332	0.5498	0.3516	1.8384	1.8654	1.1118	1.1418	0.7195
	X - 21339			46384	LC/MS Neg		5105	453.323					1.0369	0.6396	0.9324	1.1651	0.7266	0.6612	0.6113	0.6999	0.9108	0.7592	0.1931	0.9234	2.0294	1.7831	1.2086	2.0741	1.2046	1.2615	0.8776	4.3749	0.5528	0.6171	1.2081	1.1635	1.5061	1.3223	1.4384
	X - 21342			46387	LC/MS Neg		5149	385.166					0.9363	0.9348	1.1635	1.0139	1.0712	0.9144	0.9155	0.869	1.0272	1.1772	1.0116	0.9876	0.8963	0.8744	0.9103	1.0253	1.0377	0.9542	0.9155	1.0208	1.2249	1.6256	1.38	0.9743	0.9846	1.272	1.3118
	X - 11308			46390	LC/MS Neg		5163	365.27					1.137	1.0468	0.8997	0.8256	0.7529	0.9533	0.7356	1.1	0.864	0.7375	0.2844	0.7864	1.3974	1.1892	1.3051	1.8615	1.0673	1.1992	1.1791	1.1953	0.6857	0.4655	0.7992	0.781	1.6542	0.961	1.039
	X - 21353			46398	LC/MS Neg		5196	239.166					0.6625	1.599	0.5702	0.4526	1.034	1.3529	0.8338	2.9669	0.4152	0.7379	0.1508	0.53	1.5937	1.2827	1.4939	1.6574	0.4625	1.5526	1.3719	2.1658	1.081	0.9413	1.7843	1.3495	0.8155	0.966	0.4945
	X - 21364			46409	LC/MS Neg		3757	213.087					2.1309	1.1757	1.3365	1.1873	0.5333	1.2507	0.9561	0.8378	1.196	2.1716	0.6684	0.5961	1.0439	1.8798	0.6505	2.3408	0.8411	0.5142	0.6136	0.4252	0.8641	0.8023	1.4635	1.1257	2.0198	0.7897	1.8847
	X - 13866			46417	LC/MS Neg		2417.8	253.108					1.1723	0.7867	2.2103	0.4332	1.6084	2.0266	0.6301	0.7646	0.9986	0.756	0.3041	0.3041	0.3245	17.5157	1.2316	2.3539	0.5673	1	1.0901	0.632	4.2795	0.8108	0.5103	0.4472	1.4729	1.6215	1.1654
	X - 21383			46428	LC/MS Neg		2448	223.098					1.4533	0.5552	0.92	1.2551	0.6967	0.3933	0.8513	0.4146	1.0933	0.81	0.2462	1.3242	0.824	0.2462	3.4291	1.716	2.139	0.8356	0.2462	2.0349	0.5152	0.5952	1.1164	1.0808	3.9787	0.3202	0.2462
	X - 11442			46443	LC/MS Neg		3890	331.13					1.6992	1.5951	2.3405	1.3356	1.4027	0.6622	0.9903	0.3746	0.9631	0.6537	0.435	1.7869	1.8503	1.655	0.6341	1.0224	0.9335	0.6844	1.7429	0.8324	1.9124	0.825	1.0097	0.7993	1.941	2.5288	3.0534
	X - 11444			46460	LC/MS Neg		3972	541.265					1.6413	1.0721	1.545	0.9172	0.911	1.8161	1.0399	1.5157	1.6063	1.707	0.6859	0.5437	2.1849	1.0576	0.7553	0.79	0.8744	0.5638	0.6214	0.7168	1.0329	0.7574	1.7425	1.6045	1.782	0.9671	0.4538
	X - 16124			46461	LC/MS Neg		2563.6	203.002					1.8006	0.0169	0.0065	4.2149	0.0065	0.5475	0.0065	0.0065	1.6704	0.0065	0.0065	0.0065	0.0179	0.163	0.0065	0.0065	2.7873	0.008	0.0065	0.0065	0.1106	1.0834	0.0065	0.0065	1.02	0.98	1.5329
	X - 11843			46466	LC/MS Neg		2674.6	230.013					0.2477	0.2372	0.2015	14.9159	0.2015	3.8934	0.2015	0.2015	8.7749	0.2015	0.2015	1.6943	0.2015	0.2015	0.2015	0.7085	0.2015	0.2015	1.3599	0.2015	0.272	0.2015	0.2015	0.2015	0.5185	13.2337	1
	X - 21441			46486	LC/MS Neg		3025.4	294.113					2.5503	1.0029	0.8894	0.9666	0.5734	2.7714	1.4985	1.4574	0.846	0.7236	2.0177	1.1537	0.5209	1.807	0.4099	1.9161	1.1384	1.3829	0.5043	0.466	1.7603	1.1799	0.8777	0.7855	1.9036	0.8882	3.6451
	X - 21442			46487	LC/MS Neg		3823	333.208					0.4512	0.4512	0.6146	0.4512	0.4512	0.4512	0.4512	0.4512	0.7824	0.4512	0.4512	0.4512	0.4512	1	0.4512	0.4512	0.4512	0.4512	0.4512	0.4512	1.2655	0.4512	0.4512	0.4512	0.5893	0.4512	0.4512
	X - 11847			46488	LC/MS Neg		3087	259.01					0.5392	0.0383	0.0383	0.762	0.0383	0.1383	0.2816	1.5625	1.4246	3.7396	5.872	0.8712	1	0.0383	4.9749	0.1097	0.2315	0.0383	0.0383	0.0383	0.0383	0.0383	2.1698	1.8712	0.5366	0.0383	0.0898
	X - 17185			46490	LC/MS Neg		3079.5	215.002					13.4117	0.8339	4.4165	1	0.7742	3.1631	0.3118	0.3874	3.6697	1.703	0.734	0.3118	1.2598	1.4697	0.3118	0.5159	0.3118	0.6198	0.3399	0.3118	3.0433	0.3118	0.8907	0.8897	0.3118	4.4607	0.3118
	X - 21448			46493	LC/MS Neg		3098	317.115					1.233	1.9167	1.8096	1.1523	0.7077	0.3692	0.759	0.3692	0.3722	0.3692	0.3692	1.6634	1.2615	1.1397	0.3692	0.5137	0.3692	0.3692	1	0.4795	1.2598	0.5605	0.5021	0.6013	1.0836	1.5548	1.0641
	X - 11850			46507	LC/MS Neg		3176	226.018					0.7432	0.5668	0.2564	33.3828	0.1738	6.5012	0.1095	0.1095	13.4634	0.1095	0.1095	2.7741	0.1095	0.1095	0.1095	1.3819	0.1095	0.1631	2.8964	0.1095	0.4687	0.3205	0.1095	0.1095	1.0964	21.9351	2.249
	X - 12544			46510	LC/MS Neg		3166.9	209.082					0.4127	2.0898	0.2601	17.6434	0.2513	33.316	0.6298	1.1113	0.4833	0.2118	0.5605	0.3485	0.9874	0.2118	0.2118	0.2118	0.6288	1.1552	34.6969	0.5606	0.2118	2.5233	0.2118	0.2118	0.3617	52.0448	1.0126
	X - 21467			46512	LC/MS Neg		4041	262.62					0.9421	1.8637	0.8613	1.05	2.2541	0.8938	0.5063	0.8196	1.1784	0.95	0.5906	0.8532	1.3321	2.9685	2.4943	0.7403	0.9319	2.0224	1.1554	0.8677	0.7589	1.5456	1.0938	0.9194	1.5442	1.158	1.5737
	X - 21470			46515	LC/MS Neg		3249	232.06					1.7231	1.0845	0.3936	1.2358	0.1283	1.7872	0.8736	0.9823	0.7038	1.7961	1.6639	1.2076	0.607	3.3598	0.4199	1.6718	1.0736	0.6289	0.5747	1.0892	0.3228	1.3763	0.9204	0.7704	1.8085	0.6772	1.5283
	X - 21471			46516	LC/MS Neg		4039	295.112					0.8605	1.5602	0.6906	0.7528	2.1468	1.9311	0.5186	1.5884	0.964	0.9441	1.9836	1.3755	0.8624	5.1878	2.2189	0.9866	1.0298	2.122	0.7501	1.164	0.6156	1.0134	0.9397	0.9479	1.263	0.8143	2.4638
	X - 16946			46517	LC/MS Neg		3240	317.115					1.504	1.992	2.0132	1.1992	1.1315	0.6819	1.0155	0.3791	0.7998	0.7488	0.4873	1.9765	1.6131	1.4912	0.6375	0.8278	0.82	0.7002	1.2784	0.9925	1.678	0.9994	0.8075	0.7607	1.4474	1.4804	1.2106
361	alpha-hydroxyisovalerate	Amino Acid	Leucine, Isoleucine and Valine Metabolism	46537	LC/MS Polar	100001300	1052	117.056	99823	600-37-3		HMDB00407	0.9898	2.0178	0.7491	0.748	1.6916	0.6696	0.4817	1.1579	0.5282	2.2042	0.9533	0.8136	1.0102	1.9088	1.5409	0.9034	0.8944	0.6423	1.1791	1.0639	0.7117	0.5734	1.429	1.3332	1.3016	1.4141	0.5095
1277	N-acetylglucosamine/N-acetylgalactosamine	Carbohydrate	Aminosugar Metabolism	46539	LC/MS Pos Early	100006435	715	222.097	24139			HMDB00215	0.8823	0.914	1.3314	1.0353	0.6287	0.999	1.5648	1	0.8875	0.9903	1.2347	1.0737	1.4165	0.9644	1.0424	0.9178	0.7529	1.3283	1.3125	0.7262	0.6287	1.186	1.2282	1.0746	0.832	1.1642	0.854
320	3-methylglutarylcarnitine (2)	Amino Acid	Leucine, Isoleucine and Valine Metabolism	46548	LC/MS Pos Early	100005850	2687	290.16	128145			HMDB00552	0.9564	0.4903	1.5457	2.4725	1.6346	0.2866	1.121	1.1657	1.3479	0.8574	1.3653	0.5913	2.5009	1.4442	1.0391	0.7714	0.8457	1.8214	1.3528	0.8586	0.8914	2.0515	0.858	0.9341	0.9609	2.2849	0.3649
	X - 07765			46590	LC/MS Neg		3698	245.048					1.4542	0.3745	0.3769	0.2971	3.1505	0.3961	1	1.5903	0.2971	0.2971	0.2971	1.3789	4.3313	17.094	1.6037	1.3751	0.2971	0.3528	2.7733	0.2971	0.2971	0.2971	0.4801	0.4227	0.5312	0.2971	0.2971
	X - 11299			46592	LC/MS Neg		4886	507.222					0.8396	0.5971	0.1653	3.5284	0.1653	0.5053	0.4076	0.1653	0.6971	1.293	0.4254	1.1487	4.5722	0.8355	1	2.2073	0.4906	1.2167	1.3805	1.2615	0.2355	0.1653	0.1865	0.1653	0.4638	0.1653	2.5655
	X - 11372			46594	LC/MS Neg		5319	467.373					1.6269	1.4038	0.9342	1.0159	0.669	0.857	0.8457	1.0618	0.9712	0.652	0.6862	0.7848	1.7311	1.4314	1.2761	1.5654	0.9006	1.2361	1.0415	2.013	0.5382	0.356	0.9315	0.8858	1.9579	0.7593	1.4066
	X - 11470			46601	LC/MS Neg		4151	525.271					1.7159	1.3935	1.6966	0.7732	0.3499	2.1322	0.8447	0.9787	1.2305	0.7864	0.5036	1.2101	1.6273	0.8022	1.745	0.6397	0.6071	0.3085	0.7362	0.7329	1.0213	0.7509	1.5745	1.5838	1.9483	0.5389	1.239
	X - 11478			46602	LC/MS Neg		4285	165.092					1.1409	0.7035	0.2671	0.7193	1.0314	1.3526	1.5329	1.2516	0.2262	1.5023	0.383	1.3636	0.6251	1.0103	1.9948	0.9604	0.9897	2.1886	0.5099	1.1664	0.4403	0.4415	1.4395	1.2844	1.0499	0.4739	0.5279
	X - 11530			46603	LC/MS Neg		4892	313.12					1.3863	1.834	2.1382	1.3287	1.3487	0.714	0.9915	0.4113	0.7789	0.6159	0.4589	1.7151	1.7733	1.5047	0.7172	0.8614	0.825	0.7595	1.6072	0.9432	1.6062	1.0085	0.9096	0.89	1.708	2.2054	2.0819
	X - 11849			46607	LC/MS Neg		3215	266.018					0.8432	0.0283	0.0283	1.0284	0.0283	0.3232	0.7096	0.9716	2.7422	4.71	17.1446	0.3509	2.2409	0.0756	5.5944	0.0568	0.361	0.0429	0.0283	0.0283	0.0283	0.0396	2.5692	2.3975	2.0863	0.0283	0.0653
	X - 11880			46608	LC/MS Neg		5341	537.416					1.386	0.981	0.6957	1.0262	0.7278	1.1301	0.7263	1.346	0.9013	0.6828	0.5784	0.8229	1.3144	1.8003	1.4973	1.5615	1.0834	1.1327	1.1783	2.4133	0.6463	0.6204	0.8573	0.92	1.7817	0.742	1.2793
	X - 12007			46610	LC/MS Neg		1357	222.992					2.7038	3.0262	2.8237	3.6418	1.1994	0.1324	1.1221	1.8295	0.5177	0.7048	1.0875	0.1593	2.4148	0.169	0.4649	0.2361	0.1502	4.9607	0.1254	0.1254	0.1254	0.1254	0.8915	0.9125	0.2234	0.1789	0.1254
	X - 12013			46611	LC/MS Neg		2066	242.013					1.1848	0.7408	0.3961	18.8959	0.3929	3.3259	0.3483	0.3579	8.4461	0.3483	0.3483	1.9527	0.3483	0.3483	0.3483	1.967	0.3483	0.3483	3.2752	0.3483	0.5887	0.3483	0.3483	0.8152	0.6325	13.735	2.1321
	X - 12216			46613	LC/MS Neg		1691	227.997					0.9805	1.8442	0.2662	1.0195	1.0734	0.1444	0.6646	0.4583	1.1161	0.1181	0.1138	2.4378	0.5824	0.8554	0.1138	6.1578	2.7563	1.4518	2.7886	0.9149	0.623	2.4387	0.1138	0.1138	2.3799	0.1138	5.4627
	X - 12407			46615	LC/MS Neg		1873	204.981					3.0913	2.9585	3.0559	0.3606	1.1381	0.3606	0.3606	1.0747	0.469	0.6445	0.7096	0.3606	0.3606	0.3606	0.3606	0.3606	0.3606	0.9253	0.3606	0.3606	0.3606	0.3606	0.3606	0.3606	0.3606	0.3606	0.3606
	X - 12462			46620	LC/MS Pos Early		1790	148.043					1.2723	1.1581	0.9471	0.8919	0.8627	0.89	0.902	1.015	0.9837	1.1083	0.957	0.82	1.1852	1.1756	1.1219	1.0371	0.8441	1.0728	0.8855	0.8699	0.985	1.0439	1.0588	1.1115	1.1772	0.9537	1.2969
	X - 12524			46621	LC/MS Neg		5780	205.16					1.1665	0.9586	1.3342	0.9672	0.9609	0.5523	0.577	0.6991	0.7947	2.163	1.083	1.3683	0.7838	0.5768	0.5788	1.0058	0.896	1.3706	0.6623	1.0751	1.3388	1.7524	1.3598	1.0637	0.9695	1.2752	0.927
	X - 12729			46623	LC/MS Neg		2021	227.997					1.3876	0.5694	0.9941	1.3354	0.5623	1.6849	0.6881	1.0108	3.5883	0.8522	0.9868	0.6387	0.8073	0.7024	0.5458	1.8747	1.0343	0.6024	1.1189	1.0059	1.4522	0.4943	1.6714	1.9598	1.2529	4.2326	1.4528
	X - 12798			46624	LC/MS Pos Early		2011	240.102					0.1327	0.9727	1.5894	1.9781	0.4461	0.1327	0.9215	0.1327	0.7659	0.7711	1.3396	0.1327	1.7751	0.501	0.1615	0.1976	0.1327	0.1327	0.2044	0.53	0.1327	0.7673	2.1065	1.8258	1.3082	1.0884	1.8522
	X - 12740			46627	LC/MS Neg		2497	287.023					0.1733	1.1016	2.8779	1.5441	8.6525	3.0963	0.4965	0.1733	1.5162	0.1733	2.5795	0.707	0.3301	2.5898	0.1733	3.1109	0.4708	0.8477	0.893	0.1945	0.3378	0.1733	1.5331	1.4025	1	6.4508	0.1733
	X - 14056			46632	LC/MS Pos Early		810	192.032					1.4409	1.6103	0.7854	0.8815	0.6989	1.1182	0.5058	1.7032	0.6757	1.3793	0.8839	0.4308	1.3523	1.4868	1.1866	0.9667	0.7495	1.2939	0.9354	1.0174	0.6085	1.017	1.0517	1.1762	1.2081	0.6573	0.6921
	X - 12844			46633	LC/MS Neg		4185	539.249					1.6368	0.833	0.9544	1.2848	0.7673	2.2043	0.9401	1.3338	1.0793	1.0078	0.6045	0.3307	1.2321	0.2968	0.4523	1.5467	1.3775	0.9497	1.1606	0.725	1.0029	0.9971	1.4686	1.3247	1.1063	0.6169	0.8694
	X - 12849			46636	LC/MS Neg		4696	331.176					6.8205	3.729	1.972	0.4516	1.4152	2.829	1.3371	3.3409	0.22	0.2898	5.6569	0.2645	7.3804	2.1534	1.8071	1.0721	0.1286	0.8196	1.6421	0.2318	2.7888	0.7926	1	0.9308	0.913	0.1344	0.6043
	X - 12851			46639	LC/MS Neg		4844	311.666					0.2591	30.8629	0.9869	1.4997	0.2591	0.2591	0.2591	0.2591	3.3619	0.2591	0.2591	0.8065	1.0131	2.348	0.2591	0.747	0.6152	0.83	2.1314	1.7166	0.2591	1.4293	0.2591	0.2591	0.6349	0.4891	1.3877
	X - 15469			46640	LC/MS Pos Late		785	304.212					0.9952	1.5934	0.4019	0.6715	1.1082	1.5614	1.3389	1.0134	0.5311	0.968	0.3447	0.7542	1.2495	1.112	1.0544	1.3585	0.726	2.3333	1.0048	0.8786	0.7239	0.7083	0.6153	0.5977	1.7883	0.7094	1.2769
	X - 13728			46645	LC/MS Neg		1589	197.068					1.5021	2.2305	0.9113	0.941	1.0458	0.1281	0.21	0.9542	2.6345	0.265	2.1281	1.6476	0.5679	1.212	0.3706	0.8576	0.4495	1.1477	0.937	1.0519	0.4333	0.3247	2.4535	2.262	3.4998	1.3788	0.1221
	X - 13835			46646	LC/MS Neg		1017	169.062					2.8384	1.8653	0.1899	0.4485	3.776	0.4777	0.8972	0.5367	0.1438	1.0613	1.2798	0.9318	0.6572	0.1438	0.6143	1.1324	1.5694	0.9387	0.681	1.1896	0.1438	0.8444	1.8801	1.689	3.3724	1.3654	0.8497
	X - 14939			46657	LC/MS Neg		4353	165.092					0.8284	0.723	1.0788	0.8981	2.1212	2.0901	2.1357	0.7725	0.9824	1.8414	1.727	1.4932	0.7596	1.8314	2.9988	0.7357	0.7299	2.0223	0.7091	0.5634	0.7307	0.2064	2.1457	1.9937	1.1451	1.3333	0.6301
	X - 15492			46662	LC/MS Neg		4678	541.265					1.6219	1.5639	0.7975	0.7794	0.8021	2.4856	0.6748	1.7434	0.9836	1.9434	0.4851	0.6517	1.2813	0.7863	1.2119	1.1673	1.47	0.7814	0.9749	0.4871	1.0164	1.4918	2.0202	1.9063	1.2332	0.3901	0.6532
	X - 15728			46666	LC/MS Neg		3976	231.033					0.5381	4.4061	1	4.3142	0.1606	1.2363	0.1606	0.7165	0.1606	0.1606	0.1606	2.0962	0.6124	0.9501	0.1742	14.0877	0.1606	0.185	8.8804	0.3089	0.7097	0.1606	0.1606	0.1606	0.8367	1.1514	0.1606
	X - 17325			46672	LC/MS Neg		2868	184.098					7.1998	0.721	5.3203	1.2756	2.3563	0.3428	0.6352	1.0865	4.5327	0.3428	1.9479	0.7352	0.6012	0.6886	0.3428	0.7308	0.8477	0.3844	1.2457	0.3428	1.2513	0.3428	0.5928	0.3428	0.3428	0.9135	0.5417
	X - 16576			46673	LC/MS Neg		4496	167.108					0.9137	1.0482	0.7655	1.3239	0.7111	1.0652	1.2512	0.7235	0.7219	0.4976	0.847	1.0048	1.1196	0.7126	1.0897	1.1204	1.1889	1.4203	0.9728	0.9871	0.7094	1.161	0.8241	0.9952	1.1245	0.8642	1.1577
	X - 21607			46674	LC/MS Neg		4529	167.108					1.2299	0.6398	0.501	0.47	0.9153	0.749	1.0288	1.1549	0.6	1.093	0.3668	0.8186	1.2306	1.6373	1.3492	1.3782	0.8184	1.2884	1.0312	0.9757	1.038	0.8974	1.0509	1.0907	0.981	0.4025	0.7693
	X - 16935			46681	LC/MS Neg		4471	447.276					1.2912	0.3849	1.1757	1.0242	0.6012	1.1615	0.3862	1.4457	0.6485	0.467	0.3562	0.7691	1.4674	0.9758	1.2836	2.5831	1.228	0.5708	2.3303	1.9001	1.1883	0.3397	1.293	1.25	1.6446	0.655	0.2672
	X - 16944			46683	LC/MS Neg		3718	141.092					1.439	1.0336	0.4463	0.9433	1.8867	1.1212	2.0567	0.7689	0.4277	2.0036	0.8201	1.8665	0.6378	0.935	2.1589	0.9486	0.8335	2.8667	0.261	1.1799	0.7435	0.4985	1.2169	1.1379	2.0218	1.2846	0.5467
	X - 16964			46685	LC/MS Neg		3034	174.06					1.1301	1.2084	0.9196	0.8242	0.9235	1.0008	0.9163	1.0471	0.9643	0.9992	0.9183	0.8545	1.2081	1.267	1.2264	1.1463	0.9625	1.0485	0.965	0.9045	0.9829	1.0739	1.0231	1.0083	1.2108	0.8757	1.0416
	X - 18901			46690	LC/MS Neg		3800	211.025					0.3916	1.7115	1.5541	1.6448	0.3828	0.4006	1.1834	0.4804	1.4378	0.103	0.665	1	0.6062	0.2131	0.103	1.0637	1.9416	1.5673	1.2814	2.5196	0.103	0.3221	0.1983	0.204	0.4222	0.103	3.9159
	X - 17146			46691	LC/MS Neg		4851	375.181					3.8714	1.5756	12.0577	2.074	2.3908	1.064	4.4042	0.8907	0.7484	1.0793	2.0774	0.9838	0.1478	0.1322	0.1525	0.1153	0.1077	1.4783	0.1397	0.1202	0.1263	2.7635	0.1446	0.1508	2.1508	1.0162	3.4073
	X - 18913			46695	LC/MS Neg		4538	185.118					1.0149	0.9851	0.5859	0.6342	1.9181	0.8776	1.1878	4.0131	1.6995	3.5839	1.583	0.4688	1.654	0.631	0.6987	1.2145	0.6118	0.6481	0.6389	0.8057	0.9243	1.0793	1.5301	1.3815	0.7949	0.8517	0.6583
	X - 18922			46700	LC/MS Neg		4928	299.186					1.6994	1.1023	1.0054	0.8217	1.2913	0.3564	0.3564	0.9974	1.3393	1.0026	0.8362	1.3498	0.5166	1.2024	1.176	0.5701	1.0242	0.7845	0.7319	1.4567	0.3564	0.3564	1.0273	1.3942	0.958	0.6064	0.3564
	X - 19141			46701	LC/MS Neg		3705	415.197					1.9644	1.0505	0.7522	2.5782	0.5516	0.3207	0.6034	0.6312	1.2128	0.849	0.5326	1.3703	0.8565	0.7286	0.767	0.5691	0.589	4.2243	1.0131	0.5459	1.1166	4.074	3.1376	3.0993	2.6931	0.6424	0.9869
	X - 17653			46707	LC/MS Neg		5128	365.269					0.931	0.9832	1.0229	1.1519	0.4826	1.0122	0.7363	1.1433	0.6585	0.5993	0.3777	0.5081	1.9507	1.4657	1.215	1.3694	0.9385	1.1443	1.0948	1.6909	0.8038	1.4094	0.6808	0.7365	1.0598	0.8177	1.4135
	X - 17654			46709	LC/MS Neg		5200	365.269					1.0629	1	0.8484	1.0188	0.7875	1.2973	1.1794	1.2622	0.6875	0.3746	0.3746	0.6246	1.5815	1.2653	0.9679	1.6222	0.3746	1.0455	1.0975	1.2252	0.6592	0.7607	0.6731	0.7233	0.3746	0.8704	0.9414
	X - 17690			46710	LC/MS Neg		2904	245.049					1.3504	0.431	38.6285	0.3065	3.1179	1.3667	2.2805	0.5499	0.9657	0.3273	0.3662	0.4758	1.1044	3.8653	76.2646	1	0.3011	0.3011	1.1745	4.0196	1.6008	0.6002	0.4667	0.4083	0.3011	0.9798	0.74
	X - 21736			46905	LC/MS Neg		3345	183.139					0.6555	9.6076	1.0174	0.7741	1.7701	1.647	0.8879	0.9826	1.5564	1.5372	1.1463	1.871	2.1538	0.6391	1.8979	0.5568	0.7486	1.8168	0.3595	0.7328	0.7077	0.6047	1.4461	1.3756	1.2675	0.9117	0.9392
	X - 21740			46909	LC/MS Neg		3613	188.075					1.0954	1.1668	0.8085	0.7743	0.8006	0.9565	0.8932	0.9971	1.0029	0.9602	0.9113	0.9112	1.2093	1.1745	1.0724	1.1549	1.0404	1.1447	0.9829	0.8239	1.013	1.0868	1.0465	0.9529	1.32	0.9688	1.1396
	X - 11522			46914	LC/MS Neg		4760	313.12					1.3801	1.6275	2.0454	1.3728	1.2329	0.7459	1.0119	0.4389	0.8248	0.6298	0.4563	1.6222	1.6536	1.3984	0.7134	0.9698	0.8931	0.7869	1.6273	0.9675	1.648	0.9881	0.9022	0.8651	1.6117	2.2952	2.0801
	X - 12104			46932	LC/MS Pos Early		1300	271.092					0.5879	1.0866	1.044	1.2536	0.5509	1	1.6989	1.1475	1.4133	1.0019	1.1688	1.3164	1.6621	0.8924	0.8753	0.5655	0.714	2.1504	0.9571	1.0256	0.903	1.0627	0.9703	0.894	0.6039	1.4578	0.9658
3965	gulonate*	Cofactors and Vitamins	Ascorbate and Aldarate Metabolism	46957	LC/MS Polar	100001586	2750	195.051	152304	20246-53-1	C00257	HMDB03290	0.533	1.2776	0.4971	0.5085	1.177	0.6549	0.8752	1.2585	0.8621	2.1147	1.2433	0.682	1.2829	1.0021	0.5369	0.8351	0.94	1.3284	1.1726	1.0308	0.8902	1.791	1.1396	1.1134	0.9979	1.0299	0.5021
5223	sulfate*	Xenobiotics	Chemical	46960	LC/MS Neg	100002528	616	96.9601	1118	14808-79-8	C00059	HMDB01448	0.9963	0.9791	1.0648	0.9763	0.9501	1.0363	1.0737	1.0059	1.0859	0.8813	1.198	0.9817	1.152	0.9104	1.0886	0.9889	1.1294	0.9262	0.9986	1.0889	0.7931	1.0457	1.0799	0.983	1.0014	0.8328	0.8326
	X - 17676			46970	LC/MS Neg		1485	167.047					2.2036	1.6031	1.1121	1.0248	0.5065	0.8428	0.8788	0.971	1.7009	0.5065	1.2592	0.9251	0.681	0.5065	0.6567	0.5065	0.5065	1.1824	1.379	0.5065	0.7546	0.7379	0.9752	1.2038	0.8739	0.5065	0.5492
	X - 21803			46980	LC/MS Neg		2035	212.003					0.0604	0.0604	0.0604	0.0604	0.0604	0.0604	0.0604	0.0604	0.0604	1.9396	0.0604	0.0604	0.0604	0.0604	0.0604	0.0604	0.0604	0.0604	0.0604	0.0604	0.0604	0.0604	0.0604	0.0604	0.0604	0.0604	0.0604
	X - 21821			46998	LC/MS Neg		2930	243.078					1	0.9392	2.2657	0.5792	1.0367	0.4781	0.8481	2.0164	1.2459	0.2766	2.6568	0.3839	1.811	1.9817	0.2766	0.2766	0.5339	2.3031	0.6638	1.127	2.1581	2.1461	0.5681	0.5619	1.2231	0.2766	0.5716
4773	2-methoxyacetaminophen sulfate*	Xenobiotics	Drug - Analgesics, Anesthetics	47031	LC/MS Neg	100001793	1949	260.023	86290014				0.0739	0.0739	0.0739	0.0739	0.2183	0.0739	0.0739	0.0739	0.0739	0.0739	0.0739	0.0739	0.0739	0.0739	0.0739	0.0739	0.0739	0.0739	0.0739	0.0739	1.7817	0.0739	0.0739	0.0739	0.0739	0.0739	0.0739
1304	citraconate/glutaconate	Energy	TCA Cycle	47076	LC/MS Polar	100006438	2600	129.019					1.583	0.8283	1.4789	1.0062	1.1751	0.7628	0.854	0.9938	6.4846	1.4488	0.962	0.5421	1.2964	0.9465	1.1919	1.1004	0.7027	1.0282	1.2829	0.6957	1.5054	0.721	0.8484	0.6292	0.6758	1.126	0.8755
645	cyclo(ala-pro)	Peptide	Dipeptide	47098	LC/MS Pos Early	100004646	1486	169.097	6428987				2.0579	2.156	0.6563	1.0854	0.3678	0.9146	0.9021	0.6376	1.183	0.3033	2.0053	0.7084	1.4076	0.7329	0.4212	0.7781	1.291	1.2597	0.6485	0.7453	0.3033	0.4689	1.1762	1.6912	1.7679	0.8552	0.3033
4738	N-methylpipecolate	Xenobiotics	Bacterial/Fungal	47101	LC/MS Pos Early	100005383	1932	144.102	11286529	41447-17-0			4.2379	1.2896	0.9014	0.6656	0.7151	0.8619	1.0865	1.3871	1.0067	1.5764	1.0914	0.7125	1.4771	0.774	3.3769	0.665	2.8514	0.9505	0.8831	2.4586	1.1405	1.0693	0.7583	0.6771	1.3522	0.6581	0.8237
3025	etiocholanolone glucuronide	Lipid	Androgenic Steroids	47112	LC/MS Neg	100005403	4915	465.249	270605	3602-09-03		HMDB04484	1.773	1.123	0.3569	1.1709	0.2014	1.1962	1	1.3968	1.4377	0.4956	0.3276	0.2677	0.4361	0.2014	0.2163	3.1433	1.5295	0.3767	1.3283	0.4955	1.3096	2.5028	0.795	0.6318	1.1542	0.2711	2.381
4404	ferulic acid 4-sulfate	Xenobiotics	Food Component/Plant	47114	LC/MS Polar	100005389	1255	273.007	6305574	86321-29-1		HMDB29200	0.8334	1.1235	0.7681	0.0503	1.7209	0.0503	0.0503	0.8553	0.7025	0.8079	2.3418	0.0503	0.8765	0.6135	2.3534	0.0503	0.0503	0.0503	0.0503	0.0503	0.0503	0.0503	2.0387	1.8982	0.0503	0.2468	0.0503
1784	9-hydroxystearate	Lipid	Fatty Acid, Monohydroxy	47120	LC/MS Neg	100005834	5384	299.259	9570127	25498-28-6		HMDB61661	1.5201	0.6036	0.5872	0.5872	1.2875	2.1353	0.9857	0.8582	0.5872	0.5872	0.7794	0.5872	0.9932	0.5872	0.6983	0.5872	1.0142	1.5407	0.7337	2.4789	1.1239	4.3912	1.9083	1.7734	0.761	0.9736	0.9727
	X - 22162			47417	LC/MS Pos Early		960	150.058					0.887	0.8051	0.6745	1.2749	0.8828	0.7789	0.9595	0.8703	1.0691	0.724	0.6908	0.7533	0.9854	1.0435	0.8276	1.1193	1.2696	1.1779	1.066	1.759	0.7016	1.5318	0.6308	0.6414	1.313	1.0146	1.1844
	X - 12680			47437	LC/MS Pos Early		2875	229.129					2.2056	2.4957	0.4817	1.6439	1.12	0.1667	0.8872	1.3937	1.9329	0.888	1.2805	0.9045	1.3951	0.6539	1.6511	0.6863	0.7547	1.0707	0.7927	0.2535	0.3803	0.6675	1.4255	1.4229	0.8102	1.0873	0.3176
	X - 13507			47439	LC/MS Pos Early		2520	158.093					0.229	0.229	0.5972	0.229	1.1976	0.538	0.3093	0.5169	0.9361	0.229	0.229	0.229	1.1686	1.0639	2.0494	0.229	0.229	0.4368	5.2146	0.229	0.229	0.229	0.229	0.229	0.229	1.7713	0.229
	X - 12101			47642	LC/MS Pos Early		2700	164.074					1.5638	2.7204	0.3156	1.1002	1.7036	1.0361	1.3728	1.7471	0.5143	0.8154	0.4985	0.5741	0.9639	1.7465	3.8872	0.919	1.0805	3.2961	0.3318	1.0561	0.567	0.4523	1.9181	1.8938	0.8786	0.8101	0.896
	X - 11483			47650	LC/MS Neg		4449	505.208					0.4752	0.3759	0.3759	1	0.3759	0.3759	0.3759	0.3759	0.3759	0.3759	0.3759	0.3759	0.9935	0.3759	0.3759	1.3062	0.3759	0.3759	0.4131	0.3759	0.3759	0.3759	0.3759	0.3759	0.3759	0.3759	0.3759
	X - 11858			47654	LC/MS Neg		4414	437.055					0.5329	0.1242	0.1242	0.2855	0.1242	0.1242	0.1242	0.4674	2.884	4.3532	18.3492	0.5949	0.784	0.1242	2.7132	0.1242	0.1242	0.1242	0.1242	0.1242	0.1242	0.1242	1.035	0.965	0.5404	0.1242	0.1242
	X - 13658			47664	LC/MS Neg		4643	253.083					0.135	0.0795	2.0452	0.0795	15.006	25.047	0.221	0.2345	0.1319	0.6722	0.2406	0.0795	0.0964	119.204	1.9659	6.263	0.1315	0.0984	2.17	0.2082	30.9214	3.1265	0.0795	0.0795	1.5931	1.3278	0.0795
	X - 18899			47670	LC/MS Neg		3730	337.143					3.2004	0.9236	1.1509	1.495	0.9385	0.8744	1.4133	0.7836	0.6041	1.0261	1.9174	1.564	0.2168	1.3379	0.4331	0.8942	0.8771	1.2038	0.5864	2.3719	0.3211	1.0795	0.8985	0.6029	2.9456	0.5119	0.9739
	X - 18921			47671	LC/MS Neg		4870	193.124					1.4767	1.0329	0.5612	0.686	0.8886	1.3059	1.8894	1.2385	0.6603	2.0943	0.1985	1.7385	0.6938	0.8308	1.9387	0.8319	0.9671	2.4618	0.6052	1.8561	0.7496	0.5475	0.8454	0.7967	2.0844	0.7647	1.3168
	X - 12100			47687	LC/MS Pos Early		2650	221.092					1.0643	0.8033	1.0037	1.079	0.7806	0.9048	1.0061	1.1309	0.817	0.889	1.0049	0.9091	1.4978	0.7324	1.0934	0.6805	1.1267	1.1194	0.9595	1.026	0.9528	1.4434	1.0437	0.9963	1.0184	0.9849	0.817
	X - 12112			47690	LC/MS Pos Early		950	142.086					5.7061	1.3003	0.772	0.6194	0.563	1.0178	1.1625	0.7951	0.8259	3.2113	0.9822	0.6232	1.1264	1.3244	3.7252	0.8227	1.4043	0.4829	0.8067	2.9455	1.9265	0.6999	1.072	0.9101	1.2898	0.6315	1.7526
	X - 12117			47695	LC/MS Pos Early		2366	204.134					1.3896	0.8805	0.843	1.1246	0.1493	0.136	0.9458	1.1658	1.6691	1.0979	0.9297	0.4918	1.5766	1.5766	1.2624	1.4829	0.4369	1.9654	0.7922	1.0634	0.9608	2.187	0.9401	0.8103	1.0464	1.6034	0.5417
	X - 12283			47708	LC/MS Pos Early		2646	245.092					0.9082	1	1.8346	0.6366	1.2708	0.4296	0.8182	1.7973	1.2755	0.1257	2.2488	0.269	1.6041	1.8724	0.1257	0.1257	0.3674	1.7521	0.714	1.0291	1.7565	2.0215	0.5339	0.4718	1.1143	0.1257	0.6364
	X - 12753			47723	LC/MS Pos Early		1422	220.064					0.8577	0.1403	2.7832	0.1631	3.3843	0.475	1.75	5.021	1.319	2.4603	0.3851	0.1403	0.4016	1	0.2343	1.0781	0.1403	0.2459	0.1763	0.1403	0.1403	1.9	2.1717	1.7436	0.9345	1.5282	0.1403
	X - 22519			47783	LC/MS Pos Early		3490	304.211					1.0858	1.6342	0.4658	0.957	1.5294	1.7189	1.5743	1.2751	0.5732	1.0208	0.3438	0.911	1.3417	1.0592	0.9792	1.336	0.3863	2.5472	0.9218	0.8522	0.7945	0.8077	0.6683	0.6263	1.727	0.8364	1.3273
	X - 22520			47784	LC/MS Neg		4389	263.628					3.7416	2.3197	0.8087	2.1225	1.5719	0.8679	0.3606	0.3606	2.262	0.3606	0.9825	2.5826	0.5846	5.3911	0.3606	0.3606	2.0254	0.6228	0.7397	1.032	0.3606	1.537	0.4878	0.5977	0.6259	1	1.4248
	X - 13431			47788	LC/MS Pos Late		1015	302.232					1.7021	0.6568	0.9283	0.8749	1.2035	0.6011	3.031	0.6343	1.4069	0.5171	0.6466	0.7379	0.9356	1.8101	0.6883	1.2141	0.7193	1.9962	1.0644	0.7656	1.1873	1.1757	0.765	0.6748	2.2245	1.4	2.2255
	X - 13684			47790	LC/MS Pos Early		1642	242.015					0.6419	2.039	0.6449	0.5247	1.0053	1.094	0.6018	0.9021	1.0996	2.1389	1.3818	0.5821	2.0097	1.1454	2.4249	0.9392	1.1072	1.0346	0.7147	0.7642	0.9091	0.4486	1.171	0.9947	1.5738	1.0249	0.8884
	X - 15666			47800	LC/MS Pos Early		2755	221.092					1.6264	0.4543	1.1374	0.8754	1.1709	0.8708	1.6745	1.0125	1.0998	0.8689	1.4425	1.0929	0.8151	0.8669	1.5006	0.744	0.8938	0.8296	0.7049	0.4357	1.3392	0.6584	0.9791	0.9875	1.1586	1.1073	2.5115
	X - 16397			47802	LC/MS Pos Early		2809	248.095					1.4204	1.3156	0.5401	1.3361	1.1147	1.1151	1.2374	1.1337	0.5677	0.9093	1.2451	0.7545	1.2098	1.1602	2.1292	0.7206	0.5119	1.987	0.5248	0.5501	0.4376	0.4317	0.8974	1.0114	1.3015	0.9886	0.704
	X - 16580			47804	LC/MS Pos Early		2537	222.079					1.3302	2.3633	0.7243	1.5901	0.7295	1.9123	1.5571	1.6509	0.6677	0.9933	1.4915	0.7497	1.7541	1.5238	3.3956	0.7676	0.6044	2.0411	0.4724	0.5832	0.5515	0.4601	0.9469	0.9192	1.1998	1.2546	1.0067
	X - 17328			47818	LC/MS Pos Late		910	308.185					1.5407	0.1591	3.5974	0.9639	2.0606	0.5509	5.4222	0.3262	1.6368	0.5041	3.498	0.9002	19.3226	2.0663	10.988	3.1659	0.289	0.8763	1.0361	0.7995	0.1202	0.9143	3.2538	2.9845	0.2977	0.8579	3.923
	X - 17335			47820	LC/MS Pos Late		1052	248.168					0.6816	1.68	0.9651	0.7376	1.0813	1.7551	1.033	0.3501	0.4222	0.5052	0.3501	0.8578	1.6156	0.9065	1.0987	1.4524	1.0942	2.6523	0.9343	0.7276	0.3501	0.3986	1.4878	0.5211	1.7477	1.3369	1.1694
	X - 17346			47824	LC/MS Pos Early		1637	255.097					1.9982	0.7859	1.1197	1.0288	1.037	0.9312	0.9889	0.8792	0.9536	1.2399	0.7085	1.0518	1.0657	0.9003	1.0221	1.0865	1.1175	1.0589	1.0887	0.7628	1.0111	1.2454	0.7079	0.5675	0.2211	0.7773	2.5674
	X - 17340			47872	LC/MS Neg		4697	539.25					2.4464	1.8391	0.9486	0.6084	0.8949	2.4612	0.5435	1.4397	1.6064	2.3487	0.737	0.4931	0.8572	0.6155	1.4612	1.8557	0.9964	0.6662	1.0036	0.2341	0.9478	1.0444	2.4791	2.241	2.0364	0.4275	1.2249
4015	bilirubin (E,Z or Z,E)*	Cofactors and Vitamins	Hemoglobin and Porphyrin Metabolism	47886	LC/MS Pos Late	100001951	1265	585.271	5799469			HMDB00488	1.0008	2.2814	1.9235	1.4634	0.9771	0.6711	0.9741	0.547	0.832	0.6999	0.5331	1.303	1.5294	1.3408	0.8755	0.7734	0.7084	1.0273	1.2899	0.9992	1.1246	1.404	0.9415	0.7646	1.2606	0.8715	0.8478
	X - 12026			47905	LC/MS Neg		1652	180.053					0.9797	0.7473	1.3004	0.7364	0.6274	0.5729	1.3715	0.9334	1.6229	0.576	1.0203	1.1003	1.7959	0.9605	1.0827	0.4601	0.8078	1.6441	1.2023	1.1792	0.6459	1.8452	1.4414	1.2786	1.2017	1.2397	0.8932
	X - 17351			48001	LC/MS Neg		3390	243.078					1.3463	1.2529	1.8817	0.5442	1.1616	0.3813	1.0108	3.2973	1.753	0.3813	1.6822	0.3813	0.9293	1.5039	0.3813	0.4474	0.5317	1.7411	0.4536	0.8233	1.3775	1.7207	0.519	0.6491	1.553	0.3813	0.5048
	X - 17357			48009	LC/MS Neg		4098	541.265					1.2434	0.8519	0.8538	0.983	1.2449	1.7819	1.3116	1.8519	0.8987	1.017	0.6815	0.2232	1.0747	0.4135	0.6571	1.084	1.2166	1.3161	0.869	0.6052	0.8328	0.9363	1.6276	1.5068	1.2981	0.7775	0.566
	X - 17655			48019	LC/MS Neg		4169	421.061					0.0349	0.0349	0.0349	0.0349	0.0349	0.0349	0.0349	0.0349	0.0349	0.0349	0.0349	0.0349	0.0349	0.0349	0.0349	0.0349	0.0349	0.0349	0.0349	0.0349	0.0349	0.0349	0.0349	0.0349	0.0349	0.0349	0.0349
	X - 17685			48025	LC/MS Neg		2575	233.013					1.271	0.4027	8.396	3.064	1.1002	0.2628	0.2628	0.2628	0.5394	1.6822	6.3581	2.8833	0.2628	0.3279	0.762	0.3422	0.3684	0.9173	0.7374	0.4769	0.7708	0.2628	15.9746	15.6194	0.2628	15.9436	0.2628
	X - 17612			48052	LC/MS Neg		4308	567.319					0.4703	1	0.4043	1.1308	0.2539	0.2539	0.2539	0.2539	1.0143	0.2539	0.2539	1.834	0.6349	0.6141	0.2539	1.3018	1.3791	0.8098	2.7951	2.5566	0.2539	0.514	0.2539	0.2539	1.2242	0.3813	0.7067
	X - 22771			48076	LC/MS Neg		2180	160.044					1.138	1.0874	0.9119	0.8696	0.9221	1.0043	0.9013	1.0758	0.978	1.0538	0.9735	0.8274	1.2527	1.2372	1.2186	1.1294	0.966	1.0861	0.9716	0.8388	0.9957	1.0666	0.9867	1.0312	1.19	0.9464	1.134
4610	2-keto-3-deoxy-gluconate	Xenobiotics	Food Component/Plant	48141	LC/MS Polar	100005946	1900	177.041	161227	17510-99-5	C00204	HMDB01353	0.614	1.9385	1.1834	1.6304	1.6195	0.7016	1.0221	1.0282	1.0144	2.3627	1.0732	0.7696	1.6228	0.847	1.2976	0.9158	0.9074	0.9093	0.601	0.6265	0.5918	0.79	1.0906	0.9856	0.7923	1.0254	0.5625
1274	N-acetylglucosaminylasparagine	Carbohydrate	Aminosugar Metabolism	48149	LC/MS Pos Early	1215	1212	336.14	123826	2776-93-4	C04540	HMDB00489	1.9219	0.6866	0.6814	0.7905	0.392	0.5357	0.5422	1.1957	0.773	1.2853	0.7736	1.0003	1	1.3794	0.392	0.8912	1.2962	0.6751	1.3779	0.8214	1.0355	1.5087	1.086	1.0048	2.0149	0.6944	1.7039
1073	glucose	Carbohydrate	Glycolysis, Gluconeogenesis, and Pyruvate Metabolism	48152	LC/MS Polar	572	2342	225.062	5793	50-99-7	C00031	HMDB00122	0.6529	2.4645	0.9255	0.9507	2.7821	1.0035	1.0128	1.6865	0.7915	2.8921	1.094	0.9811	1.0701	1.2752	1.46	1.0421	1.2696	0.9665	0.963	0.9084	0.9849	0.8783	1.0713	1.0572	1.002	0.9902	0.9322
1199	mannose	Carbohydrate	Fructose, Mannose and Galactose Metabolism	48153	LC/MS Polar	803	2200	225.062	18950	3458-28-4	C00159	HMDB00169	0.3973	3.0106	0.5507	0.7718	2.7334	0.9894	0.9355	1.9157	0.5712	3.9419	0.6916	1.4658	1.1745	1.158	1.1731	1.0782	1.6952	1.0545	0.8852	1.0106	0.7768	1.0143	1.0863	1.1216	0.9877	0.6905	0.7679
1665	myristoleoylcarnitine (C14:1)*	Lipid	Fatty Acid Metabolism (Acyl Carnitine, Monounsaturated)	48182	LC/MS Pos Late	100006051	1316	370.295	90659872	889848-55-9			0.6657	1.835	0.3827	0.8276	1.002	1.3988	0.9604	0.8675	0.6013	0.998	0.2817	1.1095	1.2555	1.6806	1.0544	1.2875	0.6944	2.8541	1.6712	2.1269	0.6153	1.7684	0.7543	0.6566	1.4958	0.7157	1.8391
408	N-acetyltaurine	Amino Acid	Methionine, Cysteine, SAM and Taurine Metabolism	48187	LC/MS Polar	100005466	1249	166.018	159864				0.9372	1.4925	1.5517	0.9923	0.759	0.7583	1.5229	1.1204	0.9423	0.9072	0.8326	0.6187	1.6357	0.7956	1.2023	0.8951	1.0007	1.261	1.0795	0.889	0.7608	1.3468	1.7038	1.4596	1.7662	1.1572	1.0317
1193	fructose	Carbohydrate	Fructose, Mannose and Galactose Metabolism	48195	LC/MS Polar	878	2065	225.062	5984	57-48-7	C00095	HMDB00660	0.8358	3.4445	1.7668	2.5478	2.8416	0.9223	0.9552	1.4842	0.892	3.581	1.2562	0.9673	1.0792	0.5899	1.3344	1.038	1.1692	0.942	0.894	0.9552	0.818	0.8601	1.0282	0.9383	0.6786	1.5253	0.3622
1133	arabonate/xylonate	Carbohydrate	Pentose Metabolism	48255	LC/MS Polar	100006115	2700	165.041					0.9437	1.4841	0.974	1.8334	0.7186	0.5437	2.0901	1.1681	0.6685	0.9084	1.1591	0.7416	2.9751	0.7436	1.7544	1.1408	0.8526	2.4807	0.5384	0.7583	0.5628	1.2231	1.026	1.0769	0.7276	0.6086	0.6229
3750	N1-methylinosine	Nucleotide	Purine Metabolism, (Hypo)Xanthine/Inosine containing	48351	LC/MS Pos Early	100001409	1430	283.104	65095	20245-33-4		HMDB02721	1.0491	0.9069	1.0006	0.9342	0.7281	0.959	0.9976	1.2318	1.0405	1.0717	0.9674	0.9466	1.7804	1.0652	1.1585	1.1676	0.9173	1.3516	1.1937	1.2456	0.8943	1.9814	1.1241	0.9994	1.5542	0.9991	0.8993
206	dopamine 3-O-sulfate	Amino Acid	Tyrosine Metabolism	48407	LC/MS Neg	100006361	1556.2	232.029	122136		C13690	HMDB06275	1.0916	5.2751	0.8091	0.7191	0.7984	0.2519	0.9503	1.2917	1.604	1.0497	10.73	0.6773	1.587	1.0879	1.6938	0.7651	0.9441	0.9327	1.2634	0.6427	0.6094	2.3032	0.8869	0.8143	0.6785	8.6391	0.787
208	tyramine O-sulfate	Amino Acid	Tyrosine Metabolism	48408	LC/MS Neg	100006092	1565	216.034	153005	30223-92-8		HMDB06409	3.6033	0.684	0.4792	0.3587	0.3587	1.4041	0.3587	3.9281	0.3587	0.3587	1.0336	0.3587	0.3587	23.5399	1.6363	0.3587	0.4994	0.3587	0.8357	0.3587	0.4447	14.6588	3.7352	3.7262	0.3587	1.1323	0.9664
4089	4-methylguaiacol sulfate	Xenobiotics	Benzoate Metabolism	48418	LC/MS Neg	100006105	2978	217.018		756760-43-7			0.5528	0.8532	0.3301	3.8552	7.9352	1.7566	0.3301	1.7687	1.9558	0.3991	0.3301	0.6781	0.3301	0.5874	0.3301	1.9099	0.6179	0.3301	10.4684	0.3301	1	0.3301	0.4175	0.4545	3.4622	3.9438	0.3301
1034	phenylacetylcarnitine	Peptide	Acetylated Peptides	48425	LC/MS Pos Early	100006108	3092	280.154	101724840	287108-21-8			0.1627	0.9234	0.1627	1.3534	0.3237	0.1627	0.1627	0.2983	0.5363	3.0052	0.1627	1.2494	0.1627	1.2013	0.1627	1.0766	1.21	0.1627	2.1675	0.6375	0.1627	1.7899	0.1627	0.1627	1.965	0.3574	4.3536
4601	pyrraline	Xenobiotics	Food Component/Plant	48428	LC/MS Neg	100001767	2304	253.119	122228	74509-14-1		HMDB33143	2.5708	0.5015	1.2169	6.5999	1.8633	0.4276	0.9179	2.2188	3.1598	3.9776	3.4707	2.6156	2.2709	0.6276	1	0.45	0.6958	4.4795	0.7616	0.4276	0.8919	0.5394	0.8719	0.9498	0.8461	0.5362	0.5974
4125	methyl-4-hydroxybenzoate sulfate	Xenobiotics	Benzoate Metabolism	48429	LC/MS Neg	100006116	2873	230.997					0.0856	0.0856	2.1744	2.1636	1	8.351	0.2031	0.0856	2.0093	0.0856	2.7343	0.0966	24.1166	146.221	0.3439	0.1069	0.5273	15.2201	0.1074	0.0856	0.0856	1.6639	0.0856	0.0856	0.0856	0.3239	4.3244
209	N-formylphenylalanine	Amino Acid	Tyrosine Metabolism	48433	LC/MS Neg	100006056	2360	192.067	759256	13200-85-6			0.3389	0.3389	1.0175	1.0806	0.7985	0.3389	0.3389	1.1886	0.3389	1.7478	0.9312	0.9572	0.9841	0.3389	0.3389	0.3389	0.7941	1.4963	0.3389	1.479	1.0596	0.3389	1	1.8875	0.3389	1.8441	0.3389
5343	4-hydroxychlorothalonil	Xenobiotics	Chemical	48441	LC/MS Neg	100006082	4427	244.908	34217	28343-61-5			0.765	1.5608	1.4524	0.9509	0.3404	0.3394	2.7008	0.8257	2.4193	0.3569	0.7526	0.9006	1.3854	1.3863	0.4535	0.2298	0.9069	1.6317	0.3982	1.6112	0.3366	0.1159	2.4127	2.4564	1.0491	0.7126	1.8892
5349	2-methoxyresorcinol sulfate	Xenobiotics	Chemical	48445	LC/MS Neg	100006184	1863	218.997		1446269-78-8			0.2338	0.2338	4.3908	0.8583	0.3231	0.2338	0.2338	0.2338	0.2338	0.4073	4.5333	1	0.2338	0.2338	0.2338	0.2338	0.2338	0.2338	0.2338	0.2338	0.2979	0.2338	8.4239	8.3477	0.2338	4.9836	0.2338
5350	3-hydroxypyridine sulfate	Xenobiotics	Chemical	48448	LC/MS Neg	100006098	1595.5	173.987		1955-23-3			4.4819	0.763	1.0313	1.9087	1.219	1.1421	0.0759	0.3462	17.5586	0.4576	0.4376	0.2019	1.8852	1.2339	0.0759	0.9687	0.8306	0.4753	4.2478	0.0759	1.8011	0.0759	0.0759	0.1304	1.1815	0.2784	0.2002
175	4-methoxyphenol sulfate	Amino Acid	Tyrosine Metabolism	48457	LC/MS Neg	100006262	2412	203.002		3233-60-1			0.9674	1.8778	0.4727	3.0392	0.5608	1.5369	0.6023	0.9783	2.7643	0.3993	0.7225	1.0054	2.4009	0.5475	1.9873	0.9088	0.8303	1.9882	3.7859	0.8209	0.5117	0.5102	1.0279	1.1718	0.3993	0.8764	1.2838
4529	acesulfame	Xenobiotics	Food Component/Plant	48569	LC/MS Polar	100006203	756	161.987	36573	55589-62-3		HMDB33585	0.0655	0.0655	0.0655	3.678	0.3773	0.0655	0.8111	0.0655	0.0655	0.0655	15.7295	0.1305	0.0655	0.1312	1.1889	0.291	0.0655	0.0655	3.6357	8.2532	0.0655	0.0655	4.8749	4.5789	0.0655	0.0655	0.0885
4781	2-acetamidophenol sulfate	Xenobiotics	Drug - Analgesics, Anesthetics	48580	LC/MS Neg	100006190	2251	230.013	181671	40712-60-5			0.3238	1.0497	0.3238	4.2941	0.3238	0.3238	0.7426	0.3238	1.8907	0.3238	0.9503	0.3238	3.7213	0.3238	0.4819	0.3238	0.3238	1.6432	0.3238	0.9313	0.3238	0.3238	0.3238	0.5756	0.3238	0.3238	1.8711
5361	6-hydroxyindole sulfate	Xenobiotics	Chemical	48698	LC/MS Neg	100006260	2498	212.002	122198196				2.7675	2.9297	0.9818	0.3811	0.4874	0.8756	0.8068	1.4524	1.7145	0.3358	0.5228	0.8249	0.8518	3.4517	0.2319	1.6259	0.9207	0.518	1.0182	1.285	1.2359	2.1892	0.5108	0.4689	2.9255	0.2836	1.1057
4606	eugenol sulfate	Xenobiotics	Food Component/Plant	48715	LC/MS Neg	100006171	3782	243.033	180632	95480-60-7			0.7343	1.5199	1.199	0.5536	0.9967	0.2042	2.3749	1.2215	0.4492	0.9056	15.0822	1.6049	2.9373	2.0752	1.3356	1.6686	0.2915	0.3309	1.631	0.5745	0.3917	0.2042	0.4754	0.2042	0.2042	1.8368	0.5467
242	N-acetylkynurenine (2)	Amino Acid	Tryptophan Metabolism	48757	LC/MS Pos Early	100006378	2364	251.103					0.3977	0.38	0.9618	0.38	0.38	0.38	0.9818	0.38	0.9802	0.38	1.9939	0.38	0.5926	1	0.38	0.38	0.6044	0.38	0.38	2.665	0.38	2.345	1.135	1.1766	2.2482	0.5227	0.38
5347	1,2,3-benzenetriol sulfate (2)	Xenobiotics	Chemical	48762	LC/MS Neg	100006374	1709	204.981					1.0966	1.2179	15.6574	4.7996	3.2883	0.0344	0.0733	0.2037	0.6034	3.2372	9.3567	6.8306	0.2406	0.5503	1.0845	0.9155	0.631	1.9598	0.724	0.2405	2.2783	0.0637	27.5965	28.68	0.0782	21.1596	0.7153
4122	3-methoxycatechol sulfate (1)	Xenobiotics	Benzoate Metabolism	48763	LC/MS Neg	100006375	2163	218.997					1	0.6855	6.4486	3.4167	1.3799	0.0895	0.0895	0.2039	0.3057	2.8847	3.7745	4.2505	0.4819	0.3809	0.8252	0.7359	0.3217	1.7029	0.6459	0.9206	1.0353	0.0895	13.6196	13.1037	0.104	12.8742	0.0895
236	C-glycosyltryptophan	Amino Acid	Tryptophan Metabolism	48782	LC/MS Neg	100006379	1777	365.135	10981970	180509-18-6			0.9623	0.9923	1.015	1.181	0.7071	1.027	1.1408	1.0974	1.2732	0.9556	0.9083	1.0077	1.3779	0.9304	0.8676	0.8981	0.9153	1.3183	1.0638	0.9353	0.9897	1.5516	1.4335	1.3757	1.0463	1.1816	0.9339
207	p-cresol glucuronide*	Amino Acid	Tyrosine Metabolism	48841	LC/MS Neg	100006191	2420	283.082	154035	17680-99-8		HMDB11686	0.2821	0.8294	0.1057	1.8411	0.3502	0.1472	0.2454	0.1414	7.5679	0.1405	0.1057	3.9537	0.1057	0.9829	0.1057	1.1688	4.861	0.1057	4.3684	1.7072	0.1057	1	0.1057	0.1057	3.9968	1.8635	0.5653
2549	glycerophosphoglycerol	Lipid	Glycerolipid Metabolism	48857	LC/MS Polar	100001619	2430	245.043	439964		C03274		0.6564	1.1961	0.801	0.8075	2.8934	0.4627	1.298	1.8075	0.9592	1.8601	3.3134	0.4627	0.4992	1.0249	1.05	0.4627	0.8596	0.9756	0.7854	0.4627	0.4627	1.2701	0.6684	1	1.286	0.9195	0.5323
1127	arabitol/xylitol	Carbohydrate	Pentose Metabolism	48885	LC/MS Polar	100006430	1932.4	151.061					1.1133	1.0504	0.8923	1.0313	0.9272	0.7591	0.9423	1.0914	0.8512	1.2682	1.134	0.7472	1.938	44.9121	0.9496	0.7694	0.7881	1.4239	0.8768	0.8283	0.8792	1.3044	1.0783	1.0245	0.9872	0.7939	0.6915
1089	pyruvate	Carbohydrate	Glycolysis, Gluconeogenesis, and Pyruvate Metabolism	48990	LC/MS Polar	823	1083	87.0088	1060	127-17-3	C00022	HMDB00243	1.4139	2.2951	1.0638	1.1264	1.3038	1.1749	0.5595	1.5949	0.9549	2.4969	1.3335	0.8238	0.9871	0.8397	0.8812	0.9465	0.838	1.0403	0.6785	0.6434	1.0129	0.7809	1.0865	1.0188	0.8515	0.9191	0.8808
	X - 23583			49459	LC/MS Pos Early		1112	116.071					1.1924	1	0.1931	0.8904	0.4799	0.3785	0.5229	1.0959	0.1931	0.4091	1.7178	0.782	0.1931	0.5694	0.8692	1.8715	0.8617	2.4321	0.2726	2.1158	2.5673	0.1931	0.1931	0.1931	1.8794	8.0542	1.4179
	X - 23587			49463	LC/MS Pos Early		1230	132.102					2.2298	0.5321	1.0154	0.2545	0.2545	1.4761	1.1748	1.239	0.437	2.7874	1.1952	0.2545	0.8704	3.6297	0.2545	0.8645	0.76	0.772	1.4742	1.8039	0.9825	1.5052	0.2545	0.2545	0.9846	1.2452	0.6833
	X - 23590			49466	LC/MS Pos Early		1466	204.086					1.4667	1.5113	0.9987	1.0874	1.0482	0.7856	0.5364	1.9322	0.6854	1.1111	1.1492	0.4969	1.2881	1.2421	0.8584	0.8866	0.786	1.8844	0.6988	0.62	0.5889	0.4969	1.0013	0.8627	1.3367	0.7854	1.5336
	X - 23593			49469	LC/MS Pos Early		1531	191.102					2.4799	0.996	1.2711	1.2025	1.2167	1.0186	1.1324	0.957	1.0383	1.1597	0.886	0.9872	0.9798	0.955	1.004	0.8268	0.8089	0.9765	0.7604	0.5901	0.7517	0.8724	1.1087	1.047	0.5083	1.009	1.5536
	X - 23636			49512	LC/MS Pos Early		1129	249.108					1.468	0.8742	1.0694	0.933	1.0192	0.9275	0.9258	0.9147	0.9733	1.0439	1.1125	1.1095	0.9147	1.0306	0.834	1.0112	1.1128	1.1139	0.9416	0.7799	1.0116	1.0968	0.9888	0.8939	1.7247	0.8582	1.6516
	X - 23639			49515	LC/MS Pos Early		1640	134.081					1.5087	0.7331	1.1323	1.0095	1.0138	0.7088	0.8042	1.2254	0.7217	0.6353	0.5729	0.879	1.4005	1.7028	0.8963	1.6444	0.6488	1.1339	1.5022	0.7321	0.9905	0.6885	1.1044	0.9796	0.95	1.2253	1.2135
	X - 23641			49517	LC/MS Pos Late		910	288.217					1.0344	1.9952	0.5284	0.7154	0.5151	0.5151	0.5151	0.5683	0.7372	1.0384	0.5847	0.5151	0.8008	3.0675	1.015	1.0229	1.0207	0.5151	1.2042	1.1217	2.0498	0.985	0.5151	0.5509	1.3628	1.3011	0.5151
	X - 23644			49521	LC/MS Pos Early		983	146.081					1.9401	0.3865	1.2925	4.9006	20.2121	0.5447	0.9026	7.3192	2.7014	0.3692	2.001	1.0637	0.5633	2.6381	1.0793	0.4936	0.2192	0.9363	1.3318	0.5206	0.5981	0.3897	0.4968	0.4261	0.4389	1.2553	0.9155
	X - 23648			49525	LC/MS Pos Early		1656	262.103					1.8021	0.4367	0.2143	0.2143	0.81	0.2143	0.2565	0.2143	0.2143	0.2143	0.2143	0.688	1.0036	2.0711	1.6451	0.9366	1.564	0.2143	0.9964	0.3488	0.5332	0.2143	2.3068	1.8825	1.7868	2.4139	0.2143
	X - 23659			49536	LC/MS Pos Early		2449	143.118					1.0287	0.8781	0.58	1.4274	0.6661	0.8391	1.4877	2.3258	0.9727	1.0273	1.661	0.5407	0.9208	0.6921	1.3905	0.5407	0.7137	1.9249	0.9027	0.7511	2.3083	2.5608	0.8025	0.5407	1.2075	0.7775	0.5407
	X - 23662			49539	LC/MS Pos Early		2622	159.149					1.275	1.2337	0.2712	0.3029	0.2712	1.6932	0.2712	0.7802	0.2712	0.2712	0.2712	0.2712	0.5163	3.1621	0.4535	0.2712	1.0814	0.5719	0.2712	0.2712	0.4691	2.1494	0.4923	0.902	1.6792	1	0.2712
	X - 23666			49543	LC/MS Pos Early		2990	159.149					1.3074	1.0293	1.2412	0.6558	0.7777	0.849	1.1474	0.6995	1.3282	0.5252	0.8322	0.971	1.093	1.4223	1.2538	0.8628	1.103	1.029	0.866	0.3203	0.5549	0.6816	1.3206	1.3176	0.9697	0.6671	1.1569
	X - 23678			49555	LC/MS Pos Late		871	220.136					0.9627	2.523	0.4593	0.4798	1.363	1.4427	1.5284	1.4027	0.3168	0.4789	0.3168	0.3168	1	0.3717	1.548	1.2141	0.3168	4.0531	1.0358	1.0097	0.3168	0.42	0.3948	0.3168	1.243	0.5268	0.8864
	X - 23680			49557	LC/MS Pos Late		1049	338.232					1.4953	0.8776	0.8749	1.3816	1.4213	0.9542	1.107	0.9075	0.7759	1.7911	0.6594	1.5478	0.7844	1.3624	1.4272	1.0013	0.9506	3.2425	0.7211	1.2632	0.6533	0.9891	1.1779	0.858	2.5026	1.2088	0.7737
	X - 15503			49565	LC/MS Pos Early		2300	195.076					2.308	0.3998	0.7971	0.3627	0.986	0.3627	0.4219	1.2028	1.3615	0.5583	0.6727	1.0246	2.1709	0.8696	0.884	1.2199	1.3893	1.3282	0.8325	1.2463	0.3956	2.3985	1	1.3678	1.2073	0.3893	0.5557
	X - 11315			49592	LC/MS Neg		1157	128.071					1.6032	1.1416	1.3978	1.2321	0.8009	0.9296	1.0288	0.3221	0.8683	0.9825	1.2211	1.0645	0.8479	1.3359	0.2951	0.1924	0.9847	1.0153	2.1841	0.7099	0.9197	0.6443	1.6011	1.3444	0.8487	0.5836	0.9521
	X - 23739			49637	LC/MS Pos Early		1286	262.103					1.1064	0.8505	0.9446	0.9841	0.9225	0.6274	1.0656	1.3494	1.0159	0.5644	0.8856	0.8509	1.393	1.1324	2.072	1.202	0.9118	0.8935	1.0336	0.5766	0.9587	0.6928	1.8629	1.7379	1.1524	0.8873	0.7543
	X - 23780			49679	LC/MS Pos Early		2190	144.102					1.5869	0.9895	0.7159	0.6653	3.51	10.9265	1.2637	0.9355	0.6865	0.8744	1.7702	0.582	0.8243	4.2745	1.0105	12.4872	0.6715	1.1467	12.5322	2.1051	32.4946	0.9214	0.6893	0.6673	0.3771	3.4774	1.3251
	X - 23782			49681	LC/MS Pos Late		1627	349.273					0.462	0.7737	1.0628	0.7358	2.279	1.7077	1.2458	0.7509	0.4864	1.1877	0.158	0.6441	0.996	3.4079	0.7359	2.2924	0.5042	1.6663	1.004	1.347	2.2704	1.2368	0.9949	0.8118	0.973	2.029	1.1813
	X - 23787			49688	LC/MS Neg		4343	383.153					0.9249	1.0281	0.5379	1.1988	0.3162	3.7213	0.8168	0.3162	1.1624	2.4244	1.0518	0.358	0.4676	0.9271	0.3162	2.0002	2.4505	0.5275	0.3408	0.5035	0.9895	1.604	1.276	1.1006	2.0517	0.7399	1.4314
	X - 23314			49704	LC/MS Pos Early		1132	226.128					0.8574	0.0548	0.0548	0.387	0.0548	0.2473	5.1711	1.1426	1.3983	0.2147	2.1253	1.7307	2.13	0.4941	0.0548	0.3858	0.0548	0.2618	0.1334	1.3614	0.5444	0.1985	4.9904	4.4547	0.0548	0.0548	0.2998
694	cyclo(pro-val)	Peptide	Dipeptide	49795	LC/MS Pos Early	100006065	2098	197.129	98951	2854-40-2			2.8489	3.0614	0.8907	1.321	0.9833	1.6065	0.7188	1.5668	2.0083	1.3963	0.6185	0.7406	1.5016	0.7605	0.7024	0.8775	0.9786	0.8637	0.4287	0.9546	0.6924	0.5197	1.5504	1.4564	3.8428	1.0167	0.7359
	X - 23974			49883	LC/MS Neg		4995.3	197.118					0.941	0.7788	1.4021	0.9911	1.3264	0.9744	1.1087	0.5415	0.9432	1.2433	0.4191	1.7264	0.9472	2.1928	0.5618	1.2588	0.9914	1.0391	0.8414	0.6428	1.8851	1.0637	1.2856	1.0023	1.1813	2.1498	0.9977
	X - 23997			52025	LC/MS Pos Early		1634	223.075					0.4157	1.5504	0.1214	1.7186	0.6808	1	0.6257	0.313	2.1871	0.3659	0.1154	2.0261	0.1154	0.465	0.1154	2.0918	2.5951	0.1871	2.2797	0.9521	0.5312	0.9896	0.1195	0.1154	1.7693	1.3583	1.6126
	X - 24027			52056	LC/MS Pos Late		1518	714.467					1.0175	1.0231	1.891	1.6229	2.2032	1.0721	1.1465	1.4418	1.1458	1.3348	0.6507	0.8624	0.6087	0.7383	0.721	0.6079	0.6322	0.8522	1.4112	1.1427	1.0656	1.0554	0.7847	0.8465	0.7411	0.5437	0.964
2233	1-stearoyl-2-arachidonoyl-GPS (18:0/20:4)	Lipid	Phosphatidylserine (PS)	52235	LC/MS Pos Late	100001872	2565	812.544				HMDB12383	0.4089	0.8401	1.06	0.5553	1.2785	0.8465	0.952	1.7729	1.0974	0.588	0.4089	1.407	0.5698	0.4847	0.4913	0.7117	2.6788	0.7907	1.048	1.9005	1.5136	0.4089	3.9671	3.469	0.4089	0.4089	0.6416
	X - 24241			52280	LC/MS Pos Early		2239	186.112					1.5311	0.8054	1.576	1.2803	1.0942	0.5073	1.7646	0.5645	1.0706	1.1612	0.759	0.6764	2.0678	0.6595	1.4668	0.4639	0.6006	1.1538	0.6293	0.7671	0.5933	0.7392	0.6485	0.7006	1.0927	1.3047	1.2806
502	2-hydroxybutyrate/2-hydroxyisobutyrate	Amino Acid	Glutathione Metabolism	52281	LC/MS Polar	100008928	1258	103.04					1.099	3.0867	0.6422	0.9218	2.3027	1.5173	0.813	1.5992	0.6627	5.312	1.2933	0.7883	0.9878	1.0122	1.4016	0.8726	0.7422	1.3697	0.6814	1.153	0.9393	1.0151	1.0211	0.9794	1.4574	0.8781	0.951
1361	oleate/vaccenate (18:1)	Lipid	Long Chain Monounsaturated Fatty Acid	52285	LC/MS Neg	100008930	5655	281.249					0.3794	1.8388	0.2029	0.6871	2.1479	2.1974	0.8429	0.8863	0.3919	1.6305	0.5467	1.0203	1.2521	0.5692	0.6828	1.4461	0.7699	2.7279	0.7438	1.844	1.1667	3.6043	1.0588	0.9797	1.7351	1.5827	2.5825
	X - 24243			52286	LC/MS Pos Early		1003	132.065					1.8785	2.3043	0.8402	0.6995	1.8007	0.7181	1.0903	0.844	1.0157	1.1057	0.2451	0.0666	0.4803	2.2751	0.8278	0.3234	0.9843	0.1867	1.0708	1.2863	1.5189	0.3785	1.2277	1.1661	1.7384	1.8655	0.0666
677	cyclo(met-pro)	Peptide	Dipeptide	52350	LC/MS Pos Early	100006759	2190	229.101	5325718	1355217-56-9			1.8313	0.9485	1.1162	1.3743	0.914	0.6113	0.6431	0.7653	1.0119	0.4386	1.2649	0.5279	1.536	0.4386	0.4386	0.7548	1.3975	0.9881	0.625	0.4685	0.4386	0.4386	1.565	1.5708	0.909	1.2318	0.9159
3990	gamma-tocopherol/beta-tocopherol	Cofactors and Vitamins	Tocopherol Metabolism	52473	LC/MS Pos Late	100008998	2384	416.364					1.4008	0.7575	0.3523	0.7504	2.9115	0.3275	0.7744	1.073	0.8384	3.4293	0.9246	1.3059	0.5185	1.0419	0.776	0.63	1.5058	1.6585	0.6527	1.0576	0.7575	1.7943	1.1576	1.1139	1.7201	0.9581	0.834
	X - 24295			52483	LC/MS Neg		1152	217.071					0.9789	5.3558	1.6661	1.5778	1.3991	1.0662	0.4153	2.6265	1.4477	3.9495	1.5569	0.4153	0.8921	0.8726	0.9573	0.7816	0.4864	0.4952	0.5684	0.739	1	0.65	1.0299	0.8825	1.3807	0.476	0.4153
	X - 24307			52502	LC/MS Neg		1342	171.078					1.4298	0.7747	0.878	0.9034	0.8522	0.9071	0.9837	0.7739	1.0163	0.9773	0.9832	1.0579	1.2181	1.0711	1.0716	1.1523	1.342	1.6284	1.2083	0.9776	1.1869	1.3147	0.5799	0.5801	0.9572	0.9595	2.1798
2697	sphinganine-1-phosphate	Lipid	Sphingolipid Synthesis	52605	LC/MS Pos Late	100001876	1431	382.272	520	19794-97-9		HMDB01383	0.7027	0.8885	0.8903	0.9073	0.6143	1.0922	1.1052	1.0718	1.1358	0.7801	0.8656	0.9972	1.0834	0.8037	0.5751	0.9406	1.5416	1.0587	1.0236	1.1851	0.79	1.0028	1.5855	1.3675	0.9257	1.1058	0.9458
2250	1-stearoyl-2-oleoyl-GPG (18:0/18:1)	Lipid	Phosphatidylglycerol (PG)	52623	LC/MS Polar	100001866	717	775.549		322647-48-3			1.0182	0.8689	1.0885	0.8911	1.1261	1.177	0.9128	0.8336	0.5863	1.59	0.7177	1.0124	0.6881	1.0736	0.7851	1.1257	0.5863	1.2337	0.5863	1.0612	1.4577	0.9876	0.8052	0.6484	1.1892	1.5253	1.3785
	X - 24411			52640	LC/MS Pos Early		1171	116.07					1.3726	1.7302	1.129	0.615	0.5135	0.9385	0.8197	1.163	0.7496	1.2757	0.8437	0.8578	1.0039	1.3744	0.784	0.9862	0.7718	1.2773	0.9961	0.9527	1.0535	1.1472	1.188	1.004	1.7325	1.0533	1.0784
	X - 24431			52661	LC/MS Pos Early		566	210.06					1.0044	0.559	1.5661	1.118	0.8311	0.9939	1.7536	1.3446	1.7561	1.5136	1.6592	0.7709	0.7364	0.2297	1.3828	0.8561	1.0593	0.732	0.2603	0.2022	1.1129	0.8076	1.0663	0.9956	0.8277	0.7688	0.8486
	X - 24432			52662	LC/MS Pos Early		618	210.061					1.3731	0.5143	0.1943	1.1321	0.1943	0.8559	1.539	0.1943	0.1943	1.3389	1.295	0.9466	0.6548	0.1943	1.4358	0.7957	1.2718	0.6398	0.3085	0.1943	1.4656	1.0713	0.9639	0.7772	0.9949	0.659	1.1551
	X - 24435			52665	LC/MS Neg		6625	465.304					1.2964	1.1642	0.9733	0.6527	1.2434	0.6835	1.0267	0.7159	1.4764	1.8718	1.172	0.503	0.8208	0.8092	0.7274	1.3502	0.9005	1.1355	0.6657	0.6784	1.0293	0.6446	1.3349	1.4031	1.2165	1.5783	0.6319
1376	nervonate (24:1n9)*	Lipid	Long Chain Monounsaturated Fatty Acid	52674	LC/MS Neg	100001231	6804	365.342	5281120	506-37-6	C08323	HMDB02368	0.5996	1	0.5214	0.309	2.5884	2.1852	0.6207	2.272	1.5663	5.1285	0.6295	3.1111	1.2593	0.8746	0.3669	1.169	2.0236	0.585	0.4865	1.0179	2.3018	1.4404	0.8908	0.4054	1.2312	0.238	2.29
2306	1-linoleoyl-GPA (18:2)*	Lipid	Lysophospholipid	52690	LC/MS Polar	100009082	1441	433.236				HMDB07856	1.5764	0.5383	1	1.5441	0.5383	0.5383	0.5383	0.8551	0.936	0.5383	0.5383	0.6257	1.339	0.5383	0.5383	1.6085	0.5383	0.7328	0.5383	0.5383	0.5383	1.6012	1.6418	1.5703	0.8405	1.319	0.6637
	X - 24473			52790	LC/MS Pos Early		1709	146.081					0.7072	1.1514	1.9549	1.4042	1.0797	0.4002	2.1169	1	0.3406	0.3406	1.5492	0.6981	0.8529	0.3406	0.6903	0.3406	0.3406	1.1942	4.2046	0.3406	0.3406	0.5193	0.6629	0.621	0.3406	0.4645	0.9437
	X - 24544			52865	LC/MS Neg		4448	411.184					1.9841	1.0562	0.7711	1.1176	0.3062	1.6213	0.9348	1.3318	1.0976	0.9989	0.7766	0.5625	0.6287	1.1869	0.3895	2.0328	2.1414	0.4602	0.7554	0.7959	1.0011	0.8085	1.0351	1.0261	2.2535	0.4292	1.6068
	X - 24546			52867	LC/MS Neg		3289	231.051					3.2244	0.8839	0.5596	1.0774	0.2596	2.4967	1.1585	1.4027	1.0355	2.6433	3.1771	0.6935	0.3787	2.3375	0.2621	4.2169	1.6689	0.4557	0.5573	1	0.557	0.8889	0.8488	0.8169	3.2466	0.6072	1.4375
	X - 24549			52870	LC/MS Neg		2610	202.051					0.9257	1.516	0.7105	0.6236	0.8442	0.6414	1.0773	2.1321	1.3193	0.8652	1.7199	0.3578	0.9871	0.822	1.5839	1.1043	1.3489	1.1806	0.5787	0.7221	0.373	0.7909	1.124	1.1653	1.0129	0.2405	0.4181
	X - 24556			52877	LC/MS Neg		2318	283.119					0.906	0.5365	1.5979	1.194	0.711	0.7113	0.8111	0.3725	1.8221	0.7795	0.3957	0.9177	1	1.4778	0.9546	0.9959	0.3725	2.7332	0.5715	0.4555	1.707	0.3725	2.28	2.0972	3.7609	1.6935	2.354
	X - 24588			52909	LC/MS Neg		2350	485.167					0.801	0.5383	1.6922	0.958	0.4876	0.8973	1.1415	0.9087	0.8513	0.6779	2.0703	1.5341	1.6246	1.1425	1.1405	0.7599	0.7903	1.6341	0.6214	0.6285	0.9611	1.0389	1.1912	1.185	1.7968	1.3303	0.6554
1783	3-hydroxystearate	Lipid	Fatty Acid, Monohydroxy	52938	LC/MS Neg	100008933	5674	299.259	5282907	45261-96-9			0.3636	1.23	0.3636	1.0137	1.018	0.3636	0.9731	1.6573	0.3636	0.9053	0.5814	0.3636	1.2551	0.6419	1.0287	0.9503	0.9057	0.3636	1.0681	0.3636	0.3636	0.3636	0.4932	0.9863	0.3636	1.0647	0.3636
1714	palmitoylcholine	Lipid	Fatty Acid Metabolism (Acyl Choline)	52944	LC/MS Pos Late	100009233	1482	342.337	151731				0.0139	0.116	2.2894	1.4136	0.0735	0.5599	1.6706	0.2876	1.918	0.2207	2.6503	1.3972	2.0384	0.3291	0.7658	0.9827	0.3692	0.8515	0.5895	1	1.0726	1.1172	1.5849	1.2767	0.4467	3.8364	0.0139
5020	sitagliptin	Xenobiotics	Drug - Metabolic	52954	LC/MS Neg	100008964	4485	468.111	11306691	486460-32-6			1	1	1	1	1	1	1	1	1	1	1	1	1	1	1	1	1	1	1	1	1	1	1	1	1	1	1
3108	glycochenodeoxycholate 3-sulfate	Lipid	Primary Bile Acid Metabolism	52974	LC/MS Neg	100006641	4820	263.628					1.6167	0.3472	1.6247	0.1799	1.1251	1.0911	0.5744	0.9432	1.0163	1.0689	1.6028	0.8754	0.8058	1.678	0.9158	1.3711	0.7073	0.6078	1.1178	0.8961	0.466	0.8686	1.0487	0.9837	0.5874	0.2974	2.488
3167	glycodeoxycholate 3-sulfate	Lipid	Secondary Bile Acid Metabolism	52975	LC/MS Neg	100006642	4875	263.628					2.3684	2.7701	1.2563	0.5914	0.9342	1.3157	0.6692	0.2794	2.546	0.6639	2.0357	1.231	0.7888	1.5068	0.11	1	2.6733	0.554	1.5093	0.8297	0.11	0.6799	0.3228	0.2837	0.3175	0.3444	1.3979
3106	glycochenodeoxycholate glucuronide (1)	Lipid	Primary Bile Acid Metabolism	52983	LC/MS Neg	100009264	4806	311.666					4.0258	2.3451	1.2496	0.7657	0.9598	0.9765	0.6172	1.0324	1.6264	1.9376	2.9924	1.7941	1.6223	5.0841	0.6754	1.0218	1.8687	0.3753	0.7744	0.5659	0.7435	0.6131	0.9145	0.7946	0.9782	0.4099	0.5679
1696	(S)-3-hydroxybutyrylcarnitine	Lipid	Fatty Acid Metabolism (Acyl Carnitine, Hydroxy)	52984	LC/MS Pos Early	100009271	2340	248.149				HMDB13127	1.1769	3.3436	0.3821	0.9605	1.9104	1.6365	0.7356	2.316	0.3821	1.3265	0.4513	0.7311	0.7958	1.2745	2.2289	0.8519	0.3821	4.9427	0.7669	1.2052	0.3821	1.1284	0.8416	0.9987	1.0013	0.4323	1.395
1685	adipoylcarnitine (C6-DC)	Lipid	Fatty Acid Metabolism (Acyl Carnitine, Dicarboxylate)	52988	LC/MS Pos Early	100006614	2570	290.16	71296139			HMDB61677	2.3596	1.2176	0.6059	1.0891	1.081	1.5256	0.5493	0.8704	0.9585	1.1505	0.3982	0.4676	1.5341	0.9524	1.3852	0.8032	0.5202	1	0.3213	0.1922	1.1988	0.9366	1.1886	1.3472	0.6454	1.4715	2.0486
1691	suberoylcarnitine (C8-DC)	Lipid	Fatty Acid Metabolism (Acyl Carnitine, Dicarboxylate)	52990	LC/MS Pos Early	100006627	2964	318.191					1.9435	1.6842	0.5689	1.0474	1.4674	1.9716	0.8175	1.0144	0.5002	1.5084	0.5086	0.5853	1.205	0.9563	0.9529	0.6189	0.7414	1.3547	0.9982	0.5526	0.7872	2.8631	1.3607	1.3569	0.9131	1.0116	2.4849
	X - 24699			53127	LC/MS Pos Early		2402	241.154					1.516	0.9581	1.0419	1.3013	0.918	0.8362	1.1096	1.0702	0.7661	0.521	0.803	0.7652	1.7456	1.0947	1.422	0.9124	0.7805	1.2304	0.8199	0.7206	0.6383	0.9277	1.2143	1.1425	1.2277	1.2068	1.353
	X - 24728			53157	LC/MS Pos Early		1431	238.038					1.0292	0.9071	0.4249	0.6223	0.4785	0.7202	0.452	1.8284	0.4249	1.1416	1.0757	0.6295	1.5296	1.5905	1.3173	0.719	0.9708	1.3764	0.7112	0.7202	0.4249	1.517	1.1305	1.1124	1.4241	0.9684	0.4249
	X - 24736			53172	LC/MS Pos Early		2821	189.135					1.6526	0.7555	0.7431	0.5395	1.125	0.2985	1.0713	0.7488	0.4097	1.2238	0.9816	1.1196	1.3776	0.6089	1.6427	1.0184	1.1228	0.9473	1.2098	0.719	0.6509	1.9023	0.2985	0.3149	1.1792	0.2985	0.8153
1666	palmitoleoylcarnitine (C16:1)*	Lipid	Fatty Acid Metabolism (Acyl Carnitine, Monounsaturated)	53223	LC/MS Pos Late	100009406	1357	398.327	71464547				0.7209	1.6421	0.6196	1.3091	1.1845	1.3417	1.1066	0.9754	0.7473	0.8868	0.5908	0.9759	1.5909	1.1618	1.0241	0.9739	0.7984	2.844	1.4785	1.7017	0.7409	2.3794	0.9729	0.7882	1.5743	1.0382	1.3927
1690	pimeloylcarnitine/3-methyladipoylcarnitine (C7-DC)	Lipid	Fatty Acid Metabolism (Acyl Carnitine, Dicarboxylate)	53224	LC/MS Pos Early	100009407	2773	304.175					1.3852	1.2252	0.7931	1.5834	0.3908	0.4917	0.9922	0.3908	0.5515	0.4015	0.6509	0.4599	1.03	1.9336	1.1612	1.5958	2.2563	1.1778	0.5346	0.4303	2.1545	2.5295	0.5111	0.5978	0.5413	2.0289	1.2518
1744	3-hydroxyhexanoate	Lipid	Fatty Acid, Monohydroxy	53230	LC/MS Neg	100006367	1725	131.071	151492	10191-24-9			0.6899	3.1755	0.7004	0.7839	1.6407	1.171	1.0162	2.1724	1.3051	2.2597	0.5723	0.9436	1.1096	0.7179	1.8301	0.7539	1.2185	2.5244	1.0937	0.9838	0.5767	1.0965	0.8075	0.8228	0.8959	0.9468	0.8718
5365	thioproline	Xenobiotics	Chemical	53231	LC/MS Pos Early	100009232	1250	134.027	93176	34592-47-4			1.2948	0.7562	0.9348	0.7801	0.9264	0.9754	1.0246	1.2838	0.7137	0.9514	1.0349	0.4923	1.1433	1.0475	2.295	0.95	1.1458	1.0747	0.7171	0.6296	0.7448	1.2093	0.9157	0.9383	1.0388	0.7573	1.7263
1136	sedoheptulose	Carbohydrate	Pentose Metabolism	53237	LC/MS Polar	100002619	2255	209.067	5459879	3019-74-7		HMDB03219	1.6095	0.4238	1.0131	1.2931	0.7487	0.3503	0.3503	0.9254	0.3503	2.9965	0.3503	0.9003	0.3503	0.9279	0.3503	0.9648	1.2014	2.3574	0.3503	0.3503	0.3503	0.3503	1.2316	0.3503	1.467	3.0688	0.9791
4680	caffeic acid sulfate	Xenobiotics	Food Component/Plant	53254	LC/MS Polar	100009337	1307	258.992				HMDB41708	0.3073	1.1142	1.359	1.1652	1.6104	0.1917	0.8942	1.262	5.2995	0.2815	2.1047	1.379	0.495	0.7233	2.7369	0.3247	0.2633	0.9513	0.1917	0.2578	0.417	0.1917	1.0487	1.097	0.5796	0.4608	0.4817
1716	palmitoloelycholine	Lipid	Fatty Acid Metabolism (Acyl Choline)	53257	LC/MS Pos Late	100009334	1385	340.321					0.1676	0.1676	1.2982	1.0338	0.1676	0.1676	0.8018	0.1676	1.3483	0.1676	2.3439	0.9662	1.1561	0.1676	0.5632	0.5102	0.1676	0.5289	0.1676	0.6543	0.5362	1.3365	1.1534	1.0946	0.1676	1.8677	0.1676
1724	eicosapentaenoylcholine	Lipid	Fatty Acid Metabolism (Acyl Choline)	53258	LC/MS Pos Late	100009336	1343	388.321					0.1667	0.1667	2.5618	0.8815	0.1667	0.1667	1.1483	0.1667	0.6792	0.1667	1.1545	1.0704	0.8671	0.1667	1.2197	1.3626	0.2591	0.9396	0.1667	0.1667	1.0604	0.5037	0.1667	0.4643	0.3128	3.3822	0.1667
1715	oleoylcholine	Lipid	Fatty Acid Metabolism (Acyl Choline)	53260	LC/MS Pos Late	100009331	1449	368.352					0.0471	0.1277	1.7755	1.551	0.0471	0.3949	1.3792	0.2553	1.8924	0.167	2.2867	1.3202	1.8708	0.3082	0.8685	0.7334	0.3605	0.844	0.5208	1.1315	0.799	1.1564	1.2974	1.141	0.4665	2.9417	0.0471
1723	arachidonoylcholine	Lipid	Fatty Acid Metabolism (Acyl Choline)	53261	LC/MS Pos Late	100009332	1390	390.337					0.0185	0.096	2.3235	1.917	0.1018	0.6273	1.8718	0.2509	1.2758	0.2681	2.7375	1.5945	1.8548	0.3826	0.7148	0.9586	0.403	1.1848	0.7053	0.8852	1.1867	1	1.2171	1.0242	0.3917	3.9762	0.0185
1718	dihomo-linolenoyl-choline	Lipid	Fatty Acid Metabolism (Acyl Choline)	53262	LC/MS Pos Late	100009335	1424	392.352					0.122	0.122	2.5233	1.037	0.122	0.3786	1.206	0.2701	1.5301	0.122	3.4301	1.5987	1.0207	0.1666	0.3199	0.7267	0.2797	0.6752	0.5159	1.0529	0.8644	1.3519	1.3181	1.0561	0.4213	3.0273	0.122
1722	docosahexaenoylcholine	Lipid	Fatty Acid Metabolism (Acyl Choline)	53263	LC/MS Pos Late	100009333	1378	414.337					0.1021	0.1021	4.4399	1.3419	0.1021	0.9185	1.8545	0.3335	1.1374	0.1135	2.7173	2.3508	1.0935	0.5916	0.7169	1.2568	0.4721	1.1022	0.6036	0.8204	2.1406	0.553	0.9448	1	0.5985	6.1689	0.1021
1288	isocitric lactone	Energy	TCA Cycle	54724	LC/MS Polar	100009239	2970	173.009	98259	4702-32-3			0.7316	1.2194	0.292	1	0.8624	0.3512	1.1538	1.3144	0.3834	0.406	1.4775	0.3073	1.3994	1.1931	1.2506	0.292	0.292	1.2116	0.292	0.8264	0.292	0.8107	0.5954	1.2242	0.5968	2.4612	0.292
5131	cetirizine	Xenobiotics	Drug - Respiratory	54745	LC/MS Pos Late	100009034	1052	389.163	2678	83881-51-0	C07778	HMDB05032	0.2143	0.2143	0.2143	0.2143	0.2143	0.2143	0.2143	0.2143	0.2143	0.2143	0.2143	0.2143	0.2143	0.2143	0.2143	0.2143	0.2143	0.2143	0.2143	0.2143	1.7857	0.2143	0.2143	0.2143	0.2143	0.2143	0.2143
2894	3beta-hydroxy-5-cholestenoate	Lipid	Sterol	54805	LC/MS Neg	100006370	5398	415.322	165511	6561-58-6	C17333		2.0575	0.5977	0.967	1.0401	1.0034	0.5472	0.9966	0.7905	0.6232	0.845	0.3816	0.4558	1.055	1.3781	0.4528	0.9834	0.7363	1.1811	1.1984	0.7655	1.1143	0.7863	1.1365	1.2478	1.1832	0.865	1.1176
	X - 24813			54841	LC/MS Neg		1286	202.048					1.2308	0.7057	0.9382	0.8746	1.0275	0.9725	0.9484	1.3248	0.9252	1.1408	0.9223	1.1302	0.9711	1.2097	0.9508	1.2571	1.3635	0.9116	1.0967	1.1017	1.2794	1.2115	0.9484	0.9596	1.4214	0.8282	1.0581
	X - 24849			54877	LC/MS Neg		4611	313.119					1.1754	1.8859	1.9893	1.4307	1.1454	0.7123	1.0056	0.4071	0.7438	0.5406	0.3924	1.7661	1.7694	1.4419	0.589	0.8405	0.7818	0.6963	1.6374	0.9944	1.6602	0.9856	0.8854	0.8404	1.5569	2.0255	1.874
2421	1-linoleoyl-GPG (18:2)*	Lipid	Lysophospholipid	54885	LC/MS Neg	100009227	5516	507.273					0.9967	0.8855	1.0934	1.2761	1.0624	0.8061	0.7673	1.1092	1.0033	0.9182	0.9113	0.8046	1.2181	1.178	0.9207	1.2795	0.9363	1.5015	0.7407	0.9346	0.5615	0.844	1.4918	1.2944	0.6738	1.1962	0.5362
1600	hexanoylglutamine	Lipid	Fatty Acid Metabolism (Acyl Glutamine)	54907	LC/MS Neg	100001733	2780	243.135					0.9498	1.5404	0.5061	0.4632	1	0.6088	1.2747	1.5408	1.1859	1.4514	0.4798	0.5517	0.8502	1.3694	0.6637	1.1389	0.3629	1.3562	1.2732	1.6282	0.3629	5.5838	1.1337	1.1188	0.8378	0.6889	0.8095
54	beta-citrylglutamate	Amino Acid	Glutamate Metabolism	54923	LC/MS Neg	100003271	530	320.062	72715786	73590-26-8	C20775		0.8608	1.1743	0.8908	0.9658	1.9992	0.4714	1.0656	1.1132	1.0309	1.1214	0.6012	0.5397	1.1824	1.2149	0.9991	0.7091	1.1615	0.8246	0.7903	0.8708	0.7895	1.1677	1.0187	0.9857	1.356	1.0009	0.7066
556	gamma-glutamyl-alpha-lysine	Peptide	Gamma-glutamyl Amino Acid	55015	LC/MS Pos Early	100010901	2784	276.155	65254				1.1095	1.093	1.0209	0.9791	0.8557	0.8751	1.0859	0.9387	1.3103	1.2073	1.0817	0.8562	1.1515	1.2012	1.2319	0.9613	0.6563	0.898	0.8049	0.8487	1.1119	1.3436	0.8966	0.8449	1.5624	1.1655	0.6967
1039	4-hydroxyphenylacetylglutamine	Peptide	Acetylated Peptides	55017	LC/MS Pos Early	100010850	1528	281.113					1.7607	0.7936	1.5071	0.9119	0.1293	0.6539	0.3695	1.586	1.7753	0.1293	0.4514	1	1.5831	15.2072	1.0562	0.4274	0.9661	0.8985	0.8637	0.6657	0.3387	3.6459	3.4057	3.1646	1.3828	1.1188	0.3018
422	2-oxoarginine*	Amino Acid	Urea cycle; Arginine and Proline Metabolism	55072	LC/MS Pos Early	100002784	1760	174.087	558	3715-10-04	C03771	HMDB04225	1.0937	0.5004	0.7901	0.694	1.1891	0.3155	0.583	0.9063	2.1881	1.2646	1.8029	0.5718	0.5499	1.1156	4.0303	0.5162	0.8137	0.2985	1.3223	0.1711	0.9016	0.1711	1.2219	0.8513	1.372	1.7891	0.1711
450	argininate*	Amino Acid	Urea cycle; Arginine and Proline Metabolism	57461	LC/MS Pos Early	100002769	2150	176.103	160437	157-07-3		HMDB03148	0.8914	0.7926	1.4255	0.5156	1.5159	0.6183	0.618	1.0454	0.978	1.0594	0.8465	0.6186	1.1442	1.3548	1.8911	0.8799	0.639	0.5011	1.7331	1.022	1.658	0.7001	0.7329	0.7555	1.6251	1.937	0.448
1719	linoleoylcholine*	Lipid	Fatty Acid Metabolism (Acyl Choline)	57463	LC/MS Pos Late	100015760	1388	366.337					0.0267	0.0764	2.0769	1.5595	0.0492	0.4798	1.4306	0.2377	2.2187	0.1619	2.1761	1.2257	2.2156	0.2401	0.5896	1.2886	0.3914	1.0144	0.5688	1	0.9962	0.8227	1.9901	1.6869	0.4712	3.5607	0.0267
1721	stearoylcholine*	Lipid	Fatty Acid Metabolism (Acyl Choline)	57464	LC/MS Pos Late	100015759	1520	370.368					0.2187	0.2187	2.0973	1.3076	0.2187	0.4038	1.2765	0.2187	1.5469	0.2187	2.0547	1.186	1.7384	0.268	0.5886	0.982	0.3334	0.8782	0.5419	1	0.9721	0.8103	1.6123	1.2682	0.3534	3.969	0.2187
1673	linolenoylcarnitine (C18:3)*	Lipid	Fatty Acid Metabolism (Acyl Carnitine, Polyunsaturated)	57511	LC/MS Pos Late	100015831	1310	422.327					0.8539	1.1624	0.2193	1.1216	0.9249	0.9999	0.9407	0.8905	0.5923	1.0104	0.2834	1.0001	1.2226	1.0441	1.1597	0.8461	1.0274	2.32	0.9106	1.2572	0.6009	1.3894	1.4498	1.1543	1.3256	1.0264	0.9067
1649	margaroylcarnitine (C17)*	Lipid	Fatty Acid Metabolism (Acyl Carnitine, Long Chain Saturated)	57512	LC/MS Pos Late	100004054	1424	414.358		106182-29-0		HMDB06210	0.8181	1.0371	1.0006	1.1342	0.7937	0.675	1.1163	0.953	1.0175	1.5423	0.4775	0.6187	1.6976	1.0579	0.9287	0.649	0.9634	2.2083	0.8156	0.9881	0.9994	2.1009	0.7494	0.6736	1.0211	1.2764	1.816
1651	arachidoylcarnitine (C20)*	Lipid	Fatty Acid Metabolism (Acyl Carnitine, Long Chain Saturated)	57513	LC/MS Pos Late	100015833	1512	456.405				HMDB06460	1.722	1.4239	0.7227	0.8566	0.9745	0.4586	1.1948	1.0489	1.3091	1.5568	0.5601	0.6927	2.1459	1.0255	0.7788	0.7584	0.7945	1.3822	0.7238	0.7016	0.5956	1.117	0.9399	0.6395	1.3164	1.4653	1.1069
1652	behenoylcarnitine (C22)*	Lipid	Fatty Acid Metabolism (Acyl Carnitine, Long Chain Saturated)	57514	LC/MS Pos Late	100015832	1561	484.436					1.5089	1.3996	0.749	1.0228	1.8633	0.4797	1.0196	1.9594	1.6272	2.4516	0.7745	0.9917	1.0965	0.9756	0.4797	0.8432	1.02	1	0.7236	0.4797	0.7669	0.9138	0.4797	0.4915	1.4583	1.5909	0.7693
1653	lignoceroylcarnitine (C24)*	Lipid	Fatty Acid Metabolism (Acyl Carnitine, Long Chain Saturated)	57515	LC/MS Pos Late	100015834	1603	512.467					1.0903	1.2076	0.8296	0.9414	2.1398	0.715	1.3128	1.1818	1.3677	2.309	0.9816	1.0184	1.3288	0.9744	0.5476	0.8005	1.2174	1.2639	0.9816	0.6516	0.757	1.0857	0.9373	0.7994	1.1645	1.3479	0.7896
1654	cerotoylcarnitine (C26)*	Lipid	Fatty Acid Metabolism (Acyl Carnitine, Long Chain Saturated)	57516	LC/MS Pos Late	100015835	1649	540.499				HMDB06347	0.8221	1.264	0.9426	0.7645	2.3837	1.0574	1.2951	1.1584	1.2034	2.6589	0.8846	0.7667	2.1952	0.8184	0.5841	0.8097	1.1987	1.7641	1.1042	0.7981	0.6404	2.5856	0.6914	0.6178	1.6261	1.3399	0.9096
1671	ximenoylcarnitine (C26:1)*	Lipid	Fatty Acid Metabolism (Acyl Carnitine, Monounsaturated)	57517	LC/MS Pos Late	100015836	1607	538.483					1.1849	1.767	1.3603	1	1.7084	0.9823	1.5524	0.8213	1.1847	2.0836	1.0251	0.9004	1.7085	0.8972	1.0443	0.5802	1.19	1.4836	0.8864	0.541	0.541	1.4057	0.9157	0.7606	1.0593	0.8971	0.8507
1675	arachidonoylcarnitine (C20:4)	Lipid	Fatty Acid Metabolism (Acyl Carnitine, Polyunsaturated)	57518	LC/MS Pos Late	100015837	1353	448.342					0.8566	1.1498	0.994	2.0797	1.1708	1.0924	1.0533	0.8015	0.7645	0.8838	0.6288	0.7442	1.8714	1.2784	0.9129	0.9046	1.7167	1.9268	1.3538	1.1346	0.7737	1.9215	0.7129	0.6232	1.2166	1.006	1.19
1668	eicosenoylcarnitine (C20:1)*	Lipid	Fatty Acid Metabolism (Acyl Carnitine, Monounsaturated)	57519	LC/MS Pos Late	100015838	1484	454.389					1.2541	1.9193	0.6864	1.4695	1.0117	0.7394	1.0168	0.8591	0.9412	0.9716	0.47	1.0517	1.7934	0.9872	1.1263	0.7994	1.2015	2.4046	0.9211	1.0129	0.4682	1.6383	0.628	0.4393	1.1759	1.372	1.3448
1674	dihomo-linoleoylcarnitine (C20:2)*	Lipid	Fatty Acid Metabolism (Acyl Carnitine, Polyunsaturated)	57520	LC/MS Pos Late	100015839	1436	452.373					0.7748	1.2027	0.7826	1.6482	0.8817	1.032	1.0397	1.2633	0.968	0.8503	0.5156	0.6472	1.9466	0.8955	0.9486	1.1007	1.2016	1.7886	1.5439	1.3287	0.7924	2.5601	0.8898	0.8548	1.345	1.4581	1.2365
1676	dihomo-linolenoylcarnitine (C20:3n3 or 6)*	Lipid	Fatty Acid Metabolism (Acyl Carnitine, Polyunsaturated)	57521	LC/MS Pos Late	100015840	1392	450.358					1.017	1.2458	0.9433	1.5142	1.3395	1.0075	0.8848	1.3266	0.871	0.8181	0.7784	0.6982	1.5679	0.9925	0.8173	0.9686	1.5073	1.5948	1.1974	1.3518	0.5878	2.4889	0.9211	0.9239	1.3903	0.9675	0.9767
1683	docosahexaenoylcarnitine (C22:6)*	Lipid	Fatty Acid Metabolism (Acyl Carnitine, Polyunsaturated)	57523	LC/MS Pos Late	100015845	1349	472.342					0.3022	0.7671	1.2298	1.0054	0.9775	2.4744	1.4974	0.9946	0.4147	0.8356	0.3862	1.9645	0.4777	2.078	0.8691	1.7344	1.0889	1.644	1.123	1.1662	2.422	0.4915	0.3857	0.2952	1.6275	2.3863	0.8164
1680	adrenoylcarnitine (C22:4)*	Lipid	Fatty Acid Metabolism (Acyl Carnitine, Polyunsaturated)	57528	LC/MS Pos Late	100015850	1415	476.373					0.7692	1.2307	0.7081	1.877	1.0867	1.0023	0.8961	0.8857	0.7331	0.976	0.8096	0.4808	1.7555	1.086	0.6087	0.7034	1.7828	1.6615	1.2779	1.1468	0.4696	2.8047	0.5847	0.6106	1.28	1.094	1.2337
1681	docosapentaenoylcarnitine (C22:5n3)*	Lipid	Fatty Acid Metabolism (Acyl Carnitine, Polyunsaturated)	57529	LC/MS Pos Late	100015851	1387	474.358					0.303	1	1.0149	1.5409	0.303	0.303	0.303	0.303	0.303	1.1477	0.4876	0.303	0.303	1.0448	1.1124	0.9938	1.8838	1.7874	0.303	0.6892	0.303	1.6677	0.4132	0.303	1.4145	0.303	0.7151
1670	nervonoylcarnitine (C24:1)*	Lipid	Fatty Acid Metabolism (Acyl Carnitine, Monounsaturated)	57531	LC/MS Pos Late	100015846	1602	510.452					1.993	1.6938	1.2462	0.9422	1.4584	0.7375	1.3853	0.9373	1.1729	1.9226	0.9175	0.8791	1.2974	0.8148	0.9095	0.4871	1.1564	1.7339	0.7089	0.6802	0.7189	1.4275	0.8585	0.6347	1.0753	1.1508	1.0864
366	2,3-dihydroxy-2-methylbutyrate	Amino Acid	Leucine, Isoleucine and Valine Metabolism	57547	LC/MS Polar	100010869	1318	133.051	301941	14868-24-7		HMDB29576	0.7706	1.3658	0.2669	0.5837	1.2222	0.4202	0.5903	2.5024	0.8407	0.9334	10.6618	0.2968	1.3078	1	1.5795	0.5555	0.2669	1.1448	0.2669	0.2669	0.722	0.2669	0.801	1.2637	0.6391	1.662	0.2669
3879	2'-O-methylcytidine	Nucleotide	Pyrimidine Metabolism, Cytidine containing	57554	LC/MS Pos Early	100010895	2411	258.108	150971	2140-72-9			0.7617	0.9005	0.8181	1.1024	0.5908	0.9588	1.4417	0.983	1.2909	0.5908	0.9119	0.9331	1.1412	1.0036	1.0778	1	1.2837	0.9012	1.1948	1.2177	0.9761	1.1454	0.7795	0.7713	1.3437	0.7913	0.9506
5323	perfluorooctanesulfonate (PFOS)	Xenobiotics	Chemical	57564	LC/MS Polar	100010955	662	498.93	74483	1763-23-1	C18142	HMDB59586	2.0779	2.8607	0.7731	0.6475	1.1472	1.0044	0.7957	1.4386	1.0982	0.9956	1.1341	0.9619	2.0753	2.6019	2.0541	1.5819	0.5494	1.6717	0.914	0.5162	0.9752	0.2026	0.3588	0.3643	2.2226	2.6947	0.9712
3137	isoursodeoxycholate	Lipid	Secondary Bile Acid Metabolism	57577	LC/MS Neg	100002488	4809	391.285	127601	78919-26-3	C17662	HMDB00686	1.6146	1.1056	2.3474	0.9981	1.1985	0.548	1.0065	0.6898	0.4057	0.8257	0.1626	0.698	0.2961	4.4778	3.8426	2.898	0.4767	0.4456	0.5956	1.0019	6.5187	0.9177	9.0898	9.0134	2.45	2.9981	0.432
3936	N1-Methyl-4-pyridone-3-carboxamide	Cofactors and Vitamins	Nicotinate and Nicotinamide Metabolism	57584	LC/MS Pos Early	100001469	1260	153.066	440810	769-49-3	C05843	HMDB04194	0.9383	0.5746	0.9786	1.1225	1.2407	1.0514	1.6083	0.3698	1.3437	0.9337	1.149	1.1183	1.0388	0.3138	1.4705	0.574	0.9337	0.9041	0.6596	1.8223	0.7391	1.1065	1.3991	1.2865	1.0214	1.1313	0.7628
4039	beta-cryptoxanthin	Cofactors and Vitamins	Vitamin A Metabolism	57591	LC/MS Pos Late	100001977	2560	552.433	6384256	472-70-8		HMDB33844	0.5841	0.7123	1.4788	0.5856	0.2639	0.476	1.3716	0.5076	2.9846	0.2013	2.4969	1.4893	0.9898	0.6522	1.2478	1.0102	1.2322	1.4233	0.4063	0.535	2.0355	0.6937	0.5084	0.5046	1.1012	0.6106	1.8105
4035	carotene diol (1)	Cofactors and Vitamins	Vitamin A Metabolism	57635	LC/MS Pos Late	100015966	1720	568.428					0.7941	0.5399	1.0552	0.7315	0.9919	0.4473	0.8288	1.9165	1.4857	1.0976	1.108	0.7159	1.0081	1.2161	0.6488	1.6517	0.9133	1.1207	1.0242	0.5452	1.1873	1.3823	0.8178	0.7929	0.745	0.9824	0.8497
4036	carotene diol (2)	Cofactors and Vitamins	Vitamin A Metabolism	57636	LC/MS Pos Late	100015967	1904	568.428					0.9226	0.5871	0.9752	0.8381	0.9148	0.5435	1.0128	2.622	0.7832	0.6589	1.1752	0.8084	1.5213	1.5915	0.6868	1.7659	1.0014	1.0423	1.3812	0.8573	1.3265	1.3654	0.7307	0.7473	0.9986	0.8495	1.3145
4037	carotene diol (3)	Cofactors and Vitamins	Vitamin A Metabolism	57637	LC/MS Pos Late	100015968	1948	568.428					1.1183	0.8571	0.5713	1.0633	0.5559	0.6098	0.8464	1.8338	1.3828	0.5701	1.4797	0.847	1.3213	0.9668	1.0214	1.7116	0.9323	1.3823	0.9786	0.8817	0.6899	1.4586	0.9159	0.7018	1.1145	0.6551	1.1138
1393	hexadecadienoate (16:2n6)	Lipid	Long Chain Polyunsaturated Fatty Acid (n3 and n6)	57652	LC/MS Neg	100009394	5398	251.202		28290-73-5		HMDB00477	0.1309	0.6753	0.3701	0.4861	1.1058	2.4199	0.7394	0.9613	0.2076	1.4911	0.3883	0.5878	1.2418	0.8214	0.5571	2.4288	1.0853	1.7655	0.9934	2.2849	1.4746	4.8173	1.013	0.9116	1.0066	1.3932	1.6885
3841	2'-O-methyluridine	Nucleotide	Pyrimidine Metabolism, Uracil containing	57655	LC/MS Neg	100010896	1831	257.078	102212	2140-76-3			0.5353	1.0683	0.5353	1.1966	0.9866	0.9296	0.5353	0.7474	1.0902	0.5353	1.2684	0.8354	1.1152	0.9632	0.9385	0.9756	1.3185	1.3643	0.5353	1.0552	0.7895	0.8385	0.9093	1.0107	1.5174	0.9893	0.9387
129	N,N,N-trimethyl-5-aminovalerate	Amino Acid	Lysine Metabolism	57687	LC/MS Pos Early	100015962	2186	160.133					1.0818	2.0084	0.7401	1.7475	1.1931	0.6262	0.7927	1.0759	0.8258	1.526	1.1928	0.869	1.1061	1.0705	0.6043	0.8823	0.8528	1.0149	0.929	0.7234	0.3179	1.6793	1.6333	1.5625	0.9851	0.5404	1.1771
2996	cortolone glucuronide (1)	Lipid	Corticosteroids	57699	LC/MS Neg	100015971	4600	541.265					1.8064	0.7161	1.1635	0.7422	0.8162	1.7742	0.8523	1.4264	1.3519	1.8417	1.1178	0.5848	0.9875	0.7086	0.468	1.0768	1.1659	1.1516	0.9672	0.6518	1.0125	1.2052	1.3097	1.2768	2.4705	0.8022	0.7073
4882	fluconazole	Xenobiotics	Drug - Antibiotic	57707	LC/MS Neg	100015972	3564	305.097	3365	86386-73-4	D00322	HMDB14342	1	1	1	1	1	1	1	1	1	1	1	1	1	1	1	1	1	1	1	1	1	1	1	1	1	1	1
1008	ADSGEGDFXAEGGGVR*	Peptide	Fibrinogen Cleavage Peptide	57709	LC/MS Neg	100001322	2474	766.835	16133137	25422-31-5			1	1	1	1	1	1	1	1	1	1	1	1	1	1	1	1	1	1	1	1	1	1	1	1	1	1	1
1017	ADpSGEGDFXAEGGGVR*	Peptide	Fibrinogen Cleavage Peptide	57712	LC/MS Neg	100001324	2016	806.818		886023-52-5			1	1	1	1	1	1	1	1	1	1	1	1	1	1	1	1	1	1	1	1	1	1	1	1	1	1	1
	X - 24947			57714	LC/MS Neg		4518	387.185					0.4172	3.16	0.3834	0.6898	0.2869	2.9563	1.7859	1.0921	0.9644	5.2105	0.8556	0.2925	1.9177	0.3736	1.1571	2.8039	4.2184	0.8056	0.3062	1.0752	0.6274	1.0356	0.6652	0.5233	1.2081	1.823	1.3927
	X - 24951			57718	LC/MS Neg		5227	481.353					1.7551	1.2091	0.8276	0.7048	0.6567	0.7577	0.4894	1.0224	1	0.416	0.7898	0.5713	0.8768	1.7287	1.4826	1.2344	1.7069	1.6527	0.7684	0.7064	0.564	0.4081	1.1111	1.0928	0.8495	1.0618	1.5581
	X - 24953			57720	LC/MS Neg		5342	439.343					1.4065	2.5139	0.1864	1.1479	0.5409	0.776	1.4163	0.958	1.4254	0.506	0.4785	0.2584	1.042	0.3203	2.7737	1.6489	1.2056	1.1208	0.1864	1.6059	0.1864	0.2084	1.2393	1.159	3.1906	0.2132	0.3392
145	phenylacetate	Amino Acid	Phenylalanine Metabolism	57745	LC/MS Neg	100000011	2150	91.0554	999	103-82-2	C07086	HMDB00209	0.5139	0.6846	0.5139	1	0.5139	0.5139	0.5139	0.533	1.5919	0.5139	0.5139	0.8314	0.5139	0.9412	0.5139	1.4649	2.5924	0.5139	2.3927	0.7809	0.5139	1.4058	0.5139	0.5139	0.8014	0.5139	3.391
316	3-methylglutaconate	Amino Acid	Leucine, Isoleucine and Valine Metabolism	57747	LC/MS Polar	100002458	2700	99.0452	1551553	5746-90-7		HMDB00522	0.6398	1.4724	0.8629	2.1721	2.6846	0.9648	1.4773	1.3696	0.9883	0.6559	0.9932	0.7597	1.3304	1.7397	1.4127	0.6647	0.7239	0.8507	1.0253	0.7275	1.6645	1.6858	0.9955	1.0045	0.914	1.4831	0.5745
	X - 24970			57754	LC/MS Pos Early		2468	161.128					1.9749	0.7841	1.0903	0.9571	1.0005	0.8232	0.8937	0.5784	0.9464	0.8984	0.9151	0.9235	1.1316	1.1877	1.1671	0.9532	0.9848	1.4571	0.9995	0.647	1.2005	1.2358	1.8474	1.8207	35.1482	0.9374	2.3095
4467	N-oxalyl glycine (NOG)	Xenobiotics	Food Component/Plant	57776	LC/MS Polar	100015923	3292	146.01	3080614				0.5667	0.5616	0.6727	1.1725	0.5965	2.0661	1.5251	0.9435	0.8942	0.8266	0.9033	1.42	0.8463	0.6864	1.232	1.7072	2.2637	1.2712	0.8646	0.6423	3.7768	2.0382	1	0.5616	1.7582	0.6226	1.5549
475	(N(1) + N(8))-acetylspermidine	Amino Acid	Polyamine Metabolism	57814	LC/MS Pos Early	100016038	3080	188.176					0.9364	0.7822	1.2392	0.7519	1.1125	1.125	1.9516	0.9825	0.7655	0.5595	0.7601	0.7721	1.4961	0.9501	0.7427	1.0416	1.089	1.1216	1.0175	1.2558	0.8592	1.3637	0.8318	0.8453	1.1791	0.6779	1.6064
1741	2-hydroxynervonate*	Lipid	Fatty Acid, Monohydroxy	61698	LC/MS Neg	100015638	6345	381.337	5312783				1.0789	2.391	0.9482	1.0164	1.2141	0.9098	0.7081	1.1438	0.6851	1.9311	0.5567	1.4466	0.861	1.4546	2.2438	0.9837	1.3232	1.4921	0.8035	0.6586	0.6255	1.833	0.7866	0.8055	0.912	0.9494	1.5199
1473	2-hydroxyphytanate*	Lipid	Fatty Acid, Branched	61702	LC/MS Neg	100004414	5751	327.291	189026	14721-68-7			2.6042	0.4406	0.8878	0.9445	0.83	0.495	1.3822	0.8664	1.5232	1.0555	0.7197	0.6125	1.6515	0.9258	0.3473	0.6706	1.1295	2.5797	0.5978	0.7269	0.7576	1.5281	1.1621	1.1065	1.41	0.8321	1.1883
1663	5-dodecenoylcarnitine (C12:1)	Lipid	Fatty Acid Metabolism (Acyl Carnitine, Monounsaturated)	61769	LC/MS Pos Late	100016069	1135	342.264				HMDB13326	0.2782	0.5545	0.7346	0.5339	1.4337	1.3905	0.9262	0.7433	0.4569	0.5174	0.4769	0.9086	0.9832	2.7956	1	1.3592	1.2081	3.0354	3.0048	2.477	0.7829	2.3271	1.3212	1.2066	1.0878	0.608	1.0047
1642	nonanoylcarnitine (C9)	Lipid	Fatty Acid Metabolism (Acyl Carnitine, Medium Chain)	61775	LC/MS Pos Late	100006620	1003	302.233				HMDB13288	0.3975	1.085	0.6464	0.603	0.77	0.737	1	1.1676	1.0931	1.1835	0.3975	0.6731	1.3687	1.6885	1.6797	0.7034	0.9313	1.8459	1.2531	1.0006	0.3975	0.8193	0.8694	0.8166	0.3975	0.3975	0.3975
1625	2-butenoylglycine	Lipid	Fatty Acid Metabolism (Acyl Glycine)	61785	LC/MS Neg	100016110	1380	142.051	6303498	71428-89-2			1.4305	0.9284	0.4682	0.4682	0.7986	0.9682	1.3865	1.0444	0.4682	0.704	0.4682	0.4682	0.4682	1	0.6641	0.4682	0.4682	1.0463	1.0036	0.8095	0.4682	2.9814	1.6207	0.8411	0.4682	0.4682	0.4682
3840	5,6-dihydrouridine	Nucleotide	Pyrimidine Metabolism, Uracil containing	61833	LC/MS Neg	100001425	1119	245.078	94312	5627-05-04			1.0038	0.9045	1.015	1.2328	0.4761	1.1424	0.9962	0.8271	1.2214	0.5764	1.0914	0.7459	1.233	0.7559	1.0159	0.7518	0.6375	1.2221	1.005	0.9182	0.7165	1.512	1.1324	1.0836	0.8207	0.9358	0.8141
1702	3-hydroxyoleoylcarnitine	Lipid	Fatty Acid Metabolism (Acyl Carnitine, Hydroxy)	61840	LC/MS Pos Late	100019801	1406	442.353					1.0977	3.7951	0.4176	1.0062	1.0998	1.1293	0.8081	1.698	0.7353	0.9212	0.3925	0.9938	1.4266	1.664	2.1311	0.7667	0.6447	3.4083	0.8876	1.1254	0.672	1.6101	0.5974	0.6473	1.4733	0.8663	1.4689
1754	3-hydroxyoleate*	Lipid	Fatty Acid, Monohydroxy	61843	LC/MS Neg	100019966	5508	297.243					0.4999	1.6442	0.4999	1	0.6994	0.9009	0.948	1.8483	0.8928	0.731	0.7452	1.2854	1.2721	2.1601	1.0603	1.1404	1.2611	1.1659	0.8375	2.1091	0.9285	0.5123	1.1112	0.6863	4.2681	0.6635	0.5295
3012	androsterone glucuronide	Lipid	Androgenic Steroids	61846	LC/MS Neg	100002761	4953	465.249	114833	1852-43-3	C11135	HMDB02829	3.1562	1.063	0.8437	1.0995	0.2074	1.1244	0.6105	2.1474	2.4276	1.0127	0.4502	0.438	1.0548	1.9086	0.453	2.1184	0.8983	0.1317	0.555	0.3723	1.1917	1.1874	0.9873	0.9845	2.0401	0.3979	2.1429
1137	ribulonate/xylulonate/lyxonate*	Carbohydrate	Pentose Metabolism	61858	LC/MS Polar	100019968	2350	165.041					0.9524	0.5785	0.8724	0.5785	0.5785	0.5785	1.1041	0.6386	1	0.7454	0.8202	0.5785	0.5785	0.5785	1.1489	1.1227	0.5785	1.2989	0.5785	0.5785	0.5785	0.5785	0.5785	0.823	0.5785	0.5785	0.5785
1524	octadecadienedioate (C18:2-DC)*	Lipid	Fatty Acid, Dicarboxylate	61860	LC/MS Neg	100019982	4676	309.207					1.1128	0.8359	0.3161	0.844	0.8823	1.0832	0.6721	1.0469	1.1485	1.4325	0.3161	0.6668	1.4436	1.4359	0.6575	0.776	0.8157	1.008	1.3774	0.3161	0.992	0.4723	1.0793	0.9551	0.5841	0.6507	1.1142
1523	octadecenedioate (C18:1-DC)*	Lipid	Fatty Acid, Dicarboxylate	61861	LC/MS Neg	100019978	4875	311.223					1.2095	1.3035	0.7345	1.3963	0.9683	0.8891	0.7086	0.9814	0.9925	1.1698	1.074	0.7353	1.2186	0.812	0.769	0.5009	1.3467	1.1221	1.0075	0.9877	0.5913	0.8123	1.0412	1.0526	0.5559	0.4627	1.4385
1520	hexadecenedioate (C16:1-DC)*	Lipid	Fatty Acid, Dicarboxylate	61862	LC/MS Neg	100019975	4380	283.192					3.9089	1.0564	0.9044	1.102	0.9716	0.8961	1	0.8527	1.3178	1.0226	0.8263	0.5508	0.2407	1.2755	0.71	0.2407	1.6945	1.0756	0.7783	1.2082	0.7177	1.5041	0.9687	0.9192	1.437	0.6218	1.3911
1512	dodecenedioate (C12:1-DC)*	Lipid	Fatty Acid, Dicarboxylate	61864	LC/MS Neg	100019972	2700	227.129					0.7204	1.4827	1.2401	0.4473	1.5045	0.9712	0.4473	0.8414	0.7049	1.2631	1.4882	0.4473	0.4473	0.4473	0.4473	1.0624	0.4473	1.2845	0.9455	0.838	0.6362	1.2628	0.764	1.1222	0.9795	1.0205	1.151
1694	octadecenedioylcarnitine (C18:1-DC)*	Lipid	Fatty Acid Metabolism (Acyl Carnitine, Dicarboxylate)	61865	LC/MS Pos Late	100005996	1180	456.332		251981-06-3			2.204	1.9137	0.7188	1.7203	1.5207	1.3768	0.7373	0.8311	1.0984	0.8484	0.711	0.7534	1.6817	1.6826	1.0303	0.542	0.9271	2.2201	1.0022	1.2343	0.5698	0.8668	0.9749	0.9978	0.9842	0.6168	2.1215
1498	heptenedioate (C7:1-DC)*	Lipid	Fatty Acid, Dicarboxylate	61866	LC/MS Polar	100019981	2816	157.051					0.5176	1.0086	1.0518	1.4204	0.617	0.8574	2.2925	0.8963	1.1415	0.8911	1.0381	0.9914	1.8127	1.0246	1.9794	0.6395	0.5733	4.5657	0.386	0.8317	0.5826	1.0726	0.6402	0.7435	1.1951	0.8933	1.2495
1693	octadecanedioylcarnitine (C18-DC)*	Lipid	Fatty Acid Metabolism (Acyl Carnitine, Dicarboxylate)	61867	LC/MS Pos Late	100005998	1227	458.348		123233-50-1			1.5776	1.1837	0.6544	1.0538	1.5871	1.1744	0.752	0.725	1.175	1.1279	0.3546	0.7367	1.3671	2.0958	0.6426	0.6178	1.0193	0.8879	1.0958	0.6777	0.9842	0.7487	1.0158	0.9215	1.2515	0.6944	1.8052
89	1-ribosyl-imidazoleacetate*	Amino Acid	Histidine Metabolism	61868	LC/MS Pos Early	100001668	2006	259.092	5117448	29605-99-0	C05131	HMDB02331	1.1172	1.2513	1.0073	0.613	0.4416	0.367	0.8491	1.1488	0.7049	0.3983	1.3429	0.6824	1.8752	0.7667	0.891	0.4879	0.7666	1.2542	0.6694	0.6859	1.6063	1.387	1.0016	0.8988	1.0096	1.5881	1.1722
1531	3-carboxy-4-methyl-5-pentyl-2-furanpropionate (3-CMPFP)	Lipid	Fatty Acid, Dicarboxylate	61871	LC/MS Neg	100020004	4000	267.124	194501				1.1278	0.5867	1.7036	1.1652	1.8058	0.6974	0.9784	0.39	1.9155	0.6364	0.3794	0.6701	0.7649	2.8968	0.7221	0.7409	0.8265	1.5834	0.77	0.6514	1.1724	0.8266	1.101	1.0158	1.9747	1.1315	1.2715
5420	glucuronide of C10H18O2 (7)*	Partially Characterized Molecules	Partially Characterized Molecules	61887	LC/MS Neg	100020014	3790	345.156					0.8436	0.4743	0.4743	0.4743	5.0291	0.4743	21.1653	0.4743	1.0741	0.686	2.9252	0.6553	0.7957	5.855	1.1348	0.4964	0.4743	0.4743	0.4743	0.5751	0.4955	3.3518	1.1764	0.9259	0.4743	0.5678	0.4743
1580	N-acetyl-2-aminooctanoate*	Lipid	Fatty Acid, Amino	62059	LC/MS Neg	100020204	3943	200.129	95555			HMDB59745	2.0617	1.3602	1.0045	0.9569	1.0887	0.4903	2.1005	0.9955	0.5163	2.0215	0.7396	0.7934	1.8219	1.6331	2.0576	0.7781	0.4704	1.2173	0.3469	0.4444	0.9402	1.6654	0.8583	0.6251	2.7188	0.9758	0.8213
41	hydroxyasparagine	Amino Acid	Alanine and Aspartate Metabolism	62060	LC/MS Pos Early	100020205	1149	149.056	97663		C03124	HMDB32332	1.0476	0.6211	1.0612	1.1687	0.7228	0.9046	1.0359	1.1784	0.9218	0.9925	0.9595	0.8134	1.7183	0.9279	1.0519	1.0075	0.9142	1.5189	1.2152	1.0084	0.9559	1.5308	1.1413	1.1581	0.9891	1.1284	0.9659
4549	3-hydroxystachydrine*	Xenobiotics	Food Component/Plant	62062	LC/MS Pos Early	100020203	1049	160.097	442640				0.3245	3.6049	0.2316	0.1213	0.1146	0.3368	10.6919	0.1815	1.9512	0.1958	1.2541	2.4234	3.0637	1.0152	2.1889	1.81	0.4915	0.1146	0.1146	0.9848	5.6235	3.042	0.295	0.2742	0.143	0.3613	0.1146
1627	3-hydroxybutyroylglycine	Lipid	Fatty Acid Metabolism (Acyl Glycine)	62064	LC/MS Neg	100020211	889	160.061					0.7963	1.1503	1.647	1.1272	1.113	0.0445	0.4805	0.7664	0.9709	0.8019	1.501	2.0848	1.0222	0.8544	0.4207	1.0162	0.4613	1.6333	1.4515	0.914	0.7996	1.3663	1.4304	1.2249	0.0445	0.8189	0.4403
3103	glyco-beta-muricholate	Lipid	Primary Bile Acid Metabolism	62066	LC/MS Neg	100020214	4762	464.302					1.564	1.0284	2.5904	1.3681	0.4013	0.9716	0.3897	0.3897	4.1308	0.3897	0.7772	0.7884	1.919	0.4756	0.3897	1.4526	0.681	0.3897	6.1315	0.8599	0.3897	0.406	0.3897	0.4789	0.8725	0.6234	1.4601
440	N-methylhydroxyproline	Amino Acid	Urea cycle; Arginine and Proline Metabolism	62068	LC/MS Pos Early	100020215	1145	146.081					0.5698	1	0.1953	0.1953	0.1953	0.4525	2.061	0.933	2.617	0.1953	2.1641	4.7368	2.0354	0.8873	2.2698	0.1953	0.1953	0.1953	0.3294	1.5758	0.7114	0.695	0.46	0.7452	0.7165	1.0837	0.1953
1492	3-hydroxyadipate*	Lipid	Fatty Acid, Dicarboxylate	62069	LC/MS Polar	100004396	3131	161.046	151913			HMDB00345	0.5137	3.1115	0.4818	1	1.0168	0.8547	0.6959	1.5942	0.4818	1.0621	0.4818	0.4818	1.0541	1.8089	10.5138	0.4818	0.4818	1.1415	0.667	0.6212	0.4818	0.6233	1.6812	1.6491	0.6412	0.8598	0.7636
5367	perfluorooctanoate (PFOA)	Xenobiotics	Chemical	62071	LC/MS Polar	100020208	685	412.966	9554			HMDB59587	1.0322	1.9406	0.6523	0.7965	0.8624	0.5111	0.9279	1.3515	0.9678	1.6286	1.6817	1.0954	1.3445	2.3382	2.0387	0.6795	0.3691	1.5161	0.9545	0.538	0.5237	0.2114	0.2916	0.3298	1.3964	1.8825	0.4557
44	alpha-ketoglutaramate*	Amino Acid	Glutamate Metabolism	62101	LC/MS Polar	100002397	1916	144.03	48	18465-19-5			1.0057	1.0961	0.7813	0.7745	0.6357	0.8135	1.0739	1.1341	0.9424	0.7295	1.5032	0.7627	1.4532	1.0613	0.9943	0.9921	0.9473	1.0618	0.8197	1.0706	0.8138	0.7631	1.0337	0.9333	1.1642	1.6164	0.7841
497	cysteinylglycine disulfide*	Amino Acid	Glutathione Metabolism	62103	LC/MS Pos Early	100002466	2547	298.053		70555-24-7		HMDB00709	1.0506	0.7589	0.9159	1.0918	1.142	0.9592	0.9876	1.0429	0.8403	0.9404	1.0074	1.1541	1.2003	1.1325	1.2615	1.0612	0.9926	1.6496	0.8513	0.9823	0.9683	0.8369	1.1288	1.1129	1.0943	0.9811	0.9064
565	gamma-glutamylcitrulline*	Peptide	Gamma-glutamyl Amino Acid	62104	LC/MS Pos Early	100020241	1644	305.146					1.1554	0.2089	0.9503	0.6963	0.6782	0.7012	1.2275	0.2709	1.0805	1	0.7563	0.7469	1.8808	0.8544	0.4865	1.6965	0.6793	0.995	1.5134	0.7891	1.01	1.5842	1.4874	1.288	1.4119	1.341	1.0088
5460	glycine conjugate of C10H14O2 (1)*	Partially Characterized Molecules	Partially Characterized Molecules	62146	LC/MS Neg	100020254	4335	222.114					2.2969	1.5583	0.8024	0.5424	1.0038	1.0348	1.3023	0.7457	0.675	1.7419	0.6378	0.9962	0.5458	0.7752	1.1706	0.3392	1.0049	1.6493	0.2376	0.7441	0.2364	0.9945	1.516	1.3849	2.3685	0.6387	0.3861
1013	Fibrinopeptide A (5-16)*	Peptide	Fibrinogen Cleavage Peptide	62148	LC/MS Neg	100020274	2850	601.778					1	1	1	1	1	1	1	1	1	1	1	1	1	1	1	1	1	1	1	1	1	1	1	1	1	1	1
	X - 25172			62151	LC/MS Pos Early		1452	191.102					4.2013	0.7816	0.202	0.8005	0.202	0.202	0.6763	1.2268	0.202	0.202	1.5835	1.4882	0.202	0.8498	0.8124	1.1401	1.8428	2.0301	1.0021	0.716	0.5263	1.5109	0.202	0.202	0.9279	0.7815	4.8383
1513	dodecadienoate (12:2)*	Lipid	Fatty Acid, Dicarboxylate	62276	LC/MS Neg	100020478	5146	195.139					0.202	0.584	0.635	0.5821	0.8387	1.7186	1.24	1.1746	0.4884	0.6945	0.2653	0.5408	1.1586	1.3091	1.0372	2.0691	0.8447	1.5523	1.3605	1.4093	1.2033	0.7764	1.2249	1.4844	1.0208	0.9792	0.7384
1530	hydroxy-CMPF*	Lipid	Fatty Acid, Dicarboxylate	62277	LC/MS Polar	100019794	2153	255.087					1.5432	0.5564	12.3198	0.9731	3.6837	7.5979	1.5352	0.8777	0.7912	0.7095	0.4371	0.9251	0.5817	5.4307	7.9357	12.097	0.6242	1.428	18.2536	0.9698	24.943	0.0275	0.2694	0.2636	5.2021	32.0763	1.0269
278	indoleacetoylcarnitine*	Amino Acid	Tryptophan Metabolism	62279	LC/MS Pos Early	100020479	3114	319.165					1.522	2.2163	0.6247	3.6156	0.4511	3.9084	0.1546	1.3173	0.7962	1.2166	0.6987	0.8385	0.6272	1.4947	0.5979	1.4633	4.5725	0.5695	3.4599	0.6628	0.5935	0.5355	1.088	0.912	2.92	4.3336	3.3334
4497	glucuronide of piperine metabolite C17H21NO3 (3)*	Xenobiotics	Food Component/Plant	62290	LC/MS Neg	100020491	3951	462.177					3.6095	0.6147	0.6147	0.6147	0.6147	0.6147	4.7415	0.6147	0.8308	2.0551	4.994	0.6147	1.0526	0.6147	0.6514	0.9594	2.5354	0.7502	0.6147	0.7066	0.6147	2.6623	1.0406	1.2545	8.8065	0.9261	0.8341
4498	glucuronide of piperine metabolite C17H21NO3 (4)*	Xenobiotics	Food Component/Plant	62291	LC/MS Neg	100020492	3992	462.177					3.4335	0.1542	0.7943	0.4236	0.3868	0.137	5.1907	0.137	1.0293	3.4022	7.5898	3.1375	1.6445	0.1699	0.641	0.6448	2.7595	1.044	0.2781	1.3561	0.137	3.7918	0.9627	0.6723	9.5551	1.0801	1.1552
[truncated: 105 more rows]

## Sheet: Explanation & Notes
	OrigScale		Values are normalized in terms of raw area counts.
	ScaledImpData		Each biochemical in OrigScale is rescaled to set the median equal to 1.
			Then, missing values are imputed with the minimum.
[truncated: 7 more rows]
