# Supplementary material for: Characterising a healthy adult with a rare HAO1 knockout to support a therapeutic strategy for primary hyperoxaluria
Source: eLife. 2020 Mar 24;9:e54363. doi: 10.7554/eLife.54363 (PMC7108859; doi:10.7554/eLife.54363)
Supplement: Supplementary file 2. [file elife-54363-supp2.xlsx]

## Sheet: Explanation
	TrueMass® Complex Lipid Panel
	Date:	2019-04-02
	Project Code:	QMUL-01-19MLCLP+
	Client:	David Vanheel
	Organization:	Queen Mary's School of Medicine and Dentistry
	Quantitative Units:	uM
	Worksheet	Sheet Name		Data Type
	2	Lipid Class Concentrations		Quantitative
	3	Lipid Class Compositions		Mole%
	4	Species Concentrations		Quantitative
	5	Species Compositions		Mole%
	6	Fatty Acid Concentrations		Quantitative
	7	Fatty Acid Compositions		Mole%
	8	Methods	:	Explanation of Metabolon's Complex Lipid Platform Sample Preparation and Data Acquisition Details and Dataset RSD
	9	OrigScale	:	Values are normalized in terms of raw area counts.
	10	ScaledImpData	:	Each biochemical in OrigScale is re-scaled to have median equal to 1, then, missing values are imputed with the minimum.
	Abbreviation	Name	Group
	CE	Cholesteryl ester	Neutral Lipids
	MAG	Monoacylglycerol
	TAG	Triacylglycerol
	DAG	Diacylglycerol
	FFA	Free fatty acid
	PC	Phosphatidylcholine	Phospholipids
	PE	Phosphatidylethanolamine
	PI	Phosphatidylinositol
	LPC	Lysophosphatidylcholine
	LPE	Lysophosphatidylethanolamine
	SM	Sphingomyelin	Sphingolipids
	CER	Ceramide
	HCER	Hexosylceramide
	LCER	Lactosylceramide
	DCER	Dihydroceramide
	Total	Total lipid in sample

## Sheet: Lipid Class Concentrations
TrueMass® Complex Lipid Panel: Lipid Class Concentrations
Project Code:	QMUL-01-19MLCLP+
		CLIENT IDENTIFIER	S2-003-31818	S2-003-31815	S2-003-31831	S2-003-31834	S2-003-31830	S2-003-31806	S2-003-31811	S2-003-31814	S2-003-31824	S2-003-31820	S2-003-31842	S2-002-34108	S2-002-34107	S2-002-34095	S2-002-34077	S2-002-34075	S2-002-34102	S2-002-34112	S2-002-34071	S2-002-34089	S2-002-34096	S2-002-34099	S00005-001	S00005-001	S2-006-00001	S00005-06233	S2-002-00001	S2-002-00002	S2-003-31832	S2-002-34080
		SAMPLE NAME	QMUL-00224-01	QMUL-00225-01	QMUL-00226-01	QMUL-00227-01	QMUL-00228-01	QMUL-00229-01	QMUL-00230-01	QMUL-00231-01	QMUL-00232-01	QMUL-00233-01	QMUL-00234-01	QMUL-00235-01	QMUL-00236-01	QMUL-00237-01	QMUL-00238-01	QMUL-00239-01	QMUL-00240-01	QMUL-00241-01	QMUL-00242-01	QMUL-00243-01	QMUL-00244-01	QMUL-00245-01	QMUL-00246-01	QMUL-00247-01	QMUL-00248-01	QMUL-00249-01	QMUL-00250-01	QMUL-00251-01	QMUL-00252-01	QMUL-00253-01
		ORIG ORDER	1	2	3	4	5	6	7	8	9	10	11	12	13	14	15	16	17	18	19	20	21	22	23	24	25	26	27	28	29	30
		SAMPLE AMOUNT	250ul	250ul	250ul	250ul	250ul	250ul	250ul	250ul	250ul	250ul	250ul	250ul	250ul	250ul	250ul	250ul	250ul	250ul	250ul	250ul	250ul	250ul	250ul	250ul	250ul	250ul	250ul	250ul	250ul	250ul
		SAMPLE TYPE	Plasma	Plasma	Plasma	Plasma	Plasma	Plasma	Plasma	Plasma	Plasma	Plasma	Plasma	Plasma	Plasma	Plasma	Plasma	Plasma	Plasma	Plasma	Plasma	Plasma	Plasma	Plasma	Plasma	Plasma	Plasma	Plasma	Plasma	Plasma	Plasma	Plasma
Class	Name	Group Units	Predicted Knock out	control	control	Predicted Knock out	Predicted Knock out	Predicted Knock out	Predicted Knock out	Predicted Knock out	control	Predicted Knock out	Predicted Knock out	Predicted Knock out	control	Predicted Knock out	Predicted Knock out	Predicted Knock out	Predicted Knock out	Predicted Knock out	Predicted Knock out	control	control	Predicted Knock out	Predicted Knock out	Predicted Knock out	.	.	.	.	Predicted Knock out	Predicted Knock out
CE	CE	uM	2623.42	2609.97	2210.23	2305.44	1990.6	2174.27	2701.42	2109.85	3600.2	4275.3	2613.64	2532.02	2371.74	2008.2	1554.55	2948.62	3006.26	2991.84	2073.41	2603.48	3402.99	3388.28	2900.69	2527.44	3400.34	2594.8	2668.68	2568.8	4103.06	2178.89
CER	CER	uM	3.4186	4.1154	2.7834	3.0532	3.2492	3.2132	3.631	2.5406	6.7938	10.0278	2.4176	2.3928	3.2097	2.502	2.3455	3.8591	3.5504	3.7414	3.0602	3.139	4.4035	4.9387	3.8005	3.4861	4.4647	3.1963	2.927	3.1932	5.621	2.3844
DAG	DAG	uM	14.564	32.1797	42.2888	24.988	50.834	30.2934	16.1335	29.831	41.4817	213.011	31.2404	26.6942	19.7276	24.8836	26.8284	15.0802	27.82	27.7606	23.1747	19.873	46.8589	39.6056	34.4001	32.1625	22.7893	16.3459	16.3657	16.9382	40.9174	9.8107
DCER	DCER	uM	0.7511	0.8683	0.7132	0.581	0.8137	0.8293	0.9573	0.6494	1.1284	2.0022	0.8425	0.748	0.7696	0.751	1.1101	0.8641	0.9852	0.8362	0.6101	0.9076	0.7778	1.0187	0.9057	0.8062	0.9595	0.7692	0.7444	0.8518	0.9671	0.7409
FFA	FFA	uM	1007.27	1226.9	1113.34	1053.51	1484.85	1438.45	1117.5	1209.41	983.448	1139.49	1029.34	1166.8	1288.49	1086.29	864.953	1286.08	1093.74	1269.87	1032.2	1389.23	1323.22	1638.51	1093.52	1208.22	1241.41	1136.5	1047.27	1085.45	1412.06	1458.06
HCER	HCER	uM	2.8979	2.3069	2.0239	2.6229	1.2677	1.8144	3.1916	1.9127	3.4283	3.0009	2.1577	1.8772	2.5531	2.0859	1.2863	2.6571	3.2433	2.363	2.6445	1.9726	3.1361	4.0709	2.4844	2.6466	3.1233	2.3453	2.6971	2.3801	3.293	2.8178
LCER	LCER	uM	5.204	4.6333	3.3524	3.9914	2.2167	2.996	6.6408	4.0732	6.0844	3.0591	3.1089	3.9912	4.6478	2.8022	1.6423	5.6698	5.6807	4.7196	4.1164	4.8976	3.9322	4.7224	3.6328	3.7865	3.7322	3.997	4.5018	4.0734	4.5959	5.0098
LPC	LPC	uM	111.786	117.216	104.792	90.4321	104.043	68.4149	101.533	115.223	104.045	113.104	87.3219	81.7538	124.127	99.2194	134.658	96.8407	94.4257	91.5214	82.9558	106.487	111.926	124.272	105.992	108.568	108.114	129.307	124.152	147.521	138.99	104.356
LPE	LPE	uM	3.8949	4.3754	3.0089	2.5868	4.0849	1.438	3.0699	4.7423	2.8059	4.0077	3.043	2.5253	4.8687	3.141	5.9662	2.7306	2.91	4.1657	2.212	3.7491	3.1684	4.4927	3.5689	3.3567	3.1865	4.0227	4.1038	6.0526	4.3634	2.9888
MAG	MAG	uM	1.5098	1.7213	1.8914	1.4702	2.8027	1.7908	1.3257	1.6871	1.4686	2.2514	1.4689	1.3778	1.4571	1.6267	1.9725	1.2002	1.6926	1.3657	1.4253	1.5204	1.5237	1.3328	1.2864	1.2188	1.4989	1.4928	1.3773	1.4143	1.4768	1.2964
PC	PC	uM	1357.12	1611.35	1452.9	1269.12	1500.6	1138.41	1295.22	1169.94	1607.69	2738.41	1602.06	1429.88	1371.88	1094.01	1040.31	1556.94	1577.78	1786.07	1076.61	1379.4	1648.59	1638.88	1777.19	1685.95	1524.58	1448.41	1654.42	1706.95	1971.91	1258.08
PE	PE	uM	121.414	130.531	104.941	85.4439	143.4	91.288	90.173	99.994	94.5451	271.986	119.591	102.737	84.757	84.7568	91.8449	119.916	152.82	158.997	66.4551	108.731	123.649	113.825	110.912	103.143	139.535	119.661	129.84	122.815	172.987	118.909
PI	PI	uM	38.4846	42.8865	53.3323	36.9491	39.5159	33.1238	29.1919	29.2549	45.6862	79.7376	44.9434	46.0143	39.6048	25.2321	25.835	41.1754	48.2756	35.9821	44.1037	40.1963	40.59	63.7663	61.1086	59.1687	36.5848	35.9669	48.6595	51.3085	56.7752	30.3465
SM	SM	uM	441.925	389.073	346.677	345.866	327.291	333.199	426.285	331.046	612.863	631.849	373.839	422.912	396.102	301.243	273.154	524.698	479.569	467.83	335.933	365.686	436.674	504.611	473.956	453.389	477.247	397.472	408.977	421.137	564.674	384.687
TAG	TAG	uM	480.682	1028.25	1237.59	830.678	1504.15	864.33	489.262	919.827	1607.32	6542.05	1049.1	877.688	538.544	859.307	1060.72	501.856	835.555	852.454	731.053	586.839	1398.84	1057.25	1285.11	1187.75	796.493	477.19	457.987	636.961	1313.65	359.626

## Sheet: Lipid Class Compositions
TrueMass® Complex Lipid Panel: Lipid Class Compositions
Project Code:	QMUL-01-19MLCLP+
		CLIENT IDENTIFIER	S2-003-31818	S2-003-31815	S2-003-31831	S2-003-31834	S2-003-31830	S2-003-31806	S2-003-31811	S2-003-31814	S2-003-31824	S2-003-31820	S2-003-31842	S2-002-34108	S2-002-34107	S2-002-34095	S2-002-34077	S2-002-34075	S2-002-34102	S2-002-34112	S2-002-34071	S2-002-34089	S2-002-34096	S2-002-34099	S00005-001	S00005-001	S2-006-00001	S00005-06233	S2-002-00001	S2-002-00002	S2-003-31832	S2-002-34080
		SAMPLE NAME	QMUL-00224-01	QMUL-00225-01	QMUL-00226-01	QMUL-00227-01	QMUL-00228-01	QMUL-00229-01	QMUL-00230-01	QMUL-00231-01	QMUL-00232-01	QMUL-00233-01	QMUL-00234-01	QMUL-00235-01	QMUL-00236-01	QMUL-00237-01	QMUL-00238-01	QMUL-00239-01	QMUL-00240-01	QMUL-00241-01	QMUL-00242-01	QMUL-00243-01	QMUL-00244-01	QMUL-00245-01	QMUL-00246-01	QMUL-00247-01	QMUL-00248-01	QMUL-00249-01	QMUL-00250-01	QMUL-00251-01	QMUL-00252-01	QMUL-00253-01
		ORIG ORDER	1	2	3	4	5	6	7	8	9	10	11	12	13	14	15	16	17	18	19	20	21	22	23	24	25	26	27	28	29	30
		SAMPLE AMOUNT	250ul	250ul	250ul	250ul	250ul	250ul	250ul	250ul	250ul	250ul	250ul	250ul	250ul	250ul	250ul	250ul	250ul	250ul	250ul	250ul	250ul	250ul	250ul	250ul	250ul	250ul	250ul	250ul	250ul	250ul
		SAMPLE TYPE	Plasma	Plasma	Plasma	Plasma	Plasma	Plasma	Plasma	Plasma	Plasma	Plasma	Plasma	Plasma	Plasma	Plasma	Plasma	Plasma	Plasma	Plasma	Plasma	Plasma	Plasma	Plasma	Plasma	Plasma	Plasma	Plasma	Plasma	Plasma	Plasma	Plasma
Class	Name	Group Units	Predicted Knock out	control	control	Predicted Knock out	Predicted Knock out	Predicted Knock out	Predicted Knock out	Predicted Knock out	control	Predicted Knock out	Predicted Knock out	Predicted Knock out	control	Predicted Knock out	Predicted Knock out	Predicted Knock out	Predicted Knock out	Predicted Knock out	Predicted Knock out	control	control	Predicted Knock out	Predicted Knock out	Predicted Knock out	.	.	.	.	Predicted Knock out	Predicted Knock out
CE	CE	Mole%	42.2156	36.2175	33.088	38.0641	27.8028	35.1604	42.9784	34.9894	41.2915	26.6718	37.5301	37.7946	37.9328	35.886	30.5582	41.4821	40.989	38.8575	37.8362	39.3506	39.7997	39.4464	36.9112	34.2421	43.7959	40.7253	40.6025	37.9112	41.8879	36.818
CER	CER	Mole%	0.055	0.0571	0.0417	0.0504	0.0454	0.052	0.0578	0.0421	0.0779	0.0626	0.0347	0.0357	0.0513	0.0447	0.0461	0.0543	0.0484	0.0486	0.0558	0.0474	0.0515	0.0575	0.0484	0.0472	0.0575	0.0502	0.0445	0.0471	0.0574	0.0403
DAG	DAG	Mole%	0.2344	0.4465	0.6331	0.4126	0.71	0.4899	0.2567	0.4947	0.4758	1.3289	0.4486	0.3985	0.3155	0.4447	0.5274	0.2122	0.3793	0.3606	0.4229	0.3004	0.548	0.4611	0.4377	0.4357	0.2935	0.2565	0.249	0.25	0.4177	0.1658
DCER	DCER	Mole%	0.0121	0.012	0.0107	0.0096	0.0114	0.0134	0.0152	0.0108	0.0129	0.0125	0.0121	0.0112	0.0123	0.0134	0.0218	0.0122	0.0134	0.0109	0.0111	0.0137	0.0091	0.0119	0.0115	0.0109	0.0124	0.0121	0.0113	0.0126	0.0099	0.0125
FFA	FFA	Mole%	16.2088	17.0252	16.6671	17.3941	20.7389	23.2614	17.7789	20.0566	11.2794	7.1088	14.7806	17.4165	20.6077	19.4118	17.0026	18.0929	14.9127	16.4928	18.8359	20.9977	15.4758	19.0755	13.915	16.3691	15.9892	17.8373	15.9336	16.0194	14.4156	24.6377
HCER	HCER	Mole%	0.0466	0.032	0.0303	0.0433	0.0177	0.0293	0.0508	0.0317	0.0393	0.0187	0.031	0.028	0.0408	0.0373	0.0253	0.0374	0.0442	0.0307	0.0483	0.0298	0.0367	0.0474	0.0316	0.0359	0.0402	0.0368	0.041	0.0351	0.0336	0.0476
LCER	LCER	Mole%	0.0837	0.0643	0.0502	0.0659	0.031	0.0484	0.1057	0.0675	0.0698	0.0191	0.0446	0.0596	0.0743	0.0501	0.0323	0.0798	0.0775	0.0613	0.0751	0.074	0.046	0.055	0.0462	0.0513	0.0481	0.0627	0.0685	0.0601	0.0469	0.0847
LPC	LPC	Mole%	1.7988	1.6266	1.5688	1.4931	1.4532	1.1063	1.6153	1.9108	1.1933	0.7056	1.2539	1.2203	1.9852	1.773	2.647	1.3624	1.2875	1.1887	1.5138	1.6095	1.309	1.4468	1.3487	1.4709	1.3925	2.0295	1.8889	2.1772	1.4189	1.7634
LPE	LPE	Mole%	0.0627	0.0607	0.045	0.0427	0.0571	0.0233	0.0488	0.0786	0.0322	0.025	0.0437	0.0377	0.0779	0.0561	0.1173	0.0384	0.0397	0.0541	0.0404	0.0567	0.0371	0.0523	0.0454	0.0455	0.041	0.0631	0.0624	0.0893	0.0445	0.0505
MAG	MAG	Mole%	0.0243	0.0239	0.0283	0.0243	0.0391	0.029	0.0211	0.028	0.0168	0.014	0.0211	0.0206	0.0233	0.0291	0.0388	0.0169	0.0231	0.0177	0.026	0.023	0.0178	0.0155	0.0164	0.0165	0.0193	0.0234	0.021	0.0209	0.0151	0.0219
PC	PC	Mole%	21.8385	22.36	21.7504	20.9539	20.9589	18.4094	20.6064	19.402	18.4389	17.0838	23.0045	21.3434	21.9414	19.5496	20.4496	21.9035	21.5123	23.1972	19.6463	20.8492	19.2811	19.0799	22.6148	22.8414	19.6364	22.7327	25.171	25.1916	20.1311	21.2585
PE	PE	Mole%	1.9538	1.8113	1.571	1.4107	2.0029	1.4762	1.4346	1.6583	1.0844	1.6968	1.7173	1.5335	1.3556	1.5146	1.8054	1.687	2.0836	2.065	1.2127	1.6434	1.4461	1.3252	1.4114	1.3974	1.7972	1.8781	1.9754	1.8125	1.766	2.0093
PI	PI	Mole%	0.6193	0.5951	0.7984	0.61	0.5519	0.5356	0.4644	0.4852	0.524	0.4974	0.6454	0.6868	0.6334	0.4509	0.5078	0.5793	0.6582	0.4673	0.8048	0.6076	0.4747	0.7424	0.7776	0.8016	0.4712	0.5645	0.7403	0.7572	0.5796	0.5128
SM	SM	Mole%	7.1114	5.399	5.1899	5.7104	4.5713	5.3882	6.782	5.49	7.0291	3.9418	5.3681	6.3127	6.3351	5.3831	5.3695	7.3816	6.5387	6.0761	6.1302	5.5272	5.1071	5.8747	6.0311	6.1426	6.1469	6.2383	6.2224	6.2153	5.7647	6.5003
TAG	TAG	Mole%	7.735	14.2686	18.5272	13.7149	21.0085	13.9772	7.7839	15.2542	18.4347	40.8131	15.0643	13.101	8.6133	15.3556	20.8509	7.0603	11.3924	11.0715	13.3405	8.8698	16.3602	12.3085	16.353	16.0918	10.2587	7.4895	6.968	9.4005	13.4109	6.0768

## Sheet: ScaledImpData ANALYSIS
							SAMPLE NAME	QMUL-00246-01	QMUL-00247-01
	TO REDO with 26						PARENT SAMPLE ID	6049964	6049965
							CLIENT IDENTIFIER	S00005-001	S00005-001		S00005-001
							AMOUNT EXTRACTED CLP	50	50
							CLP IS LOT	LIS-CM-021519	LIS-CM-021519							HAO1 knockout vs 25 control samples
							ORIG ORDER	23	24		HAO1 knockout		25 control samples	25 control samples
							SPL AMNT	250ul	250ul		p.Leu333SerfsTer4		(see ScaledImpData INDIVIDUAL for individual level data)	(see ScaledImpData INDIVIDUAL for individual level data)
							SPL TYPE	Plasma	Plasma
PATHWAY SORTORDER	BIOCHEMICAL	SUPER PATHWAY	SUB PATHWAY	COMP ID	PLATFORM	CHEMICAL ID	Group HMDB				mean (of 2 aliquots from 1 individual)		mean (of 25 individuals)	SD (of 25 individuals)		fold SD (of 25 individuals): HAO1 knockout mean versus 25 controls mean
6962	LPC(14:0)	Lysophosphatidylcholine	LPC Ester	53285	GC-FID	100009433		0.7692	0.7692		0.7692		0.7692	0		(not tested, no variability across samples)
6755	PC(14:0/14:0)	Phosphatidylcholine	PC Ester	53293	GC-FID	100009441		1	1		1		1	0		(not tested, no variability across samples)
7188	PE(P-18:0/20:2)	Phosphatidylethanolamine	PE Plasmalogen	53340	GC-FID	100009488		1	1		1		1	0		(not tested, no variability across samples)
7182	PE(P-18:0/18:0)	Phosphatidylethanolamine	PE Plasmalogen	53522	GC-FID	100009670		1	1		1		1	0		(not tested, no variability across samples)
7026	PE(16:0/14:0)	Phosphatidylethanolamine	PE Ester	53844	GC-FID	100009992		1	1		1		1	0		(not tested, no variability across samples)
7166	PE(P-16:0/18:3)	Phosphatidylethanolamine	PE Plasmalogen	53854	GC-FID	100010002		1	1		1		1	0		(not tested, no variability across samples)
6993	PE(14:0/18:2)	Phosphatidylethanolamine	PE Ester	54005	GC-FID	100010153		1	1		1		1	0		(not tested, no variability across samples)
7055	PE(17:0/18:2)	Phosphatidylethanolamine	PE Ester	54009	GC-FID	100010157		1	1		1		1	0		(not tested, no variability across samples)
7217	PE(P-18:2/22:6)	Phosphatidylethanolamine	PE Plasmalogen	54023	GC-FID	100010171		1	1		1		1	0		(not tested, no variability across samples)
7178	PE(P-16:1/18:1)	Phosphatidylethanolamine	PE Plasmalogen	54207	GC-FID	100010355		1	1		1		1	0		(not tested, no variability across samples)
6766	PC(14:0/20:5)	Phosphatidylcholine	PC Ester	54523	GC-FID	100010671		1	1		1		1	0		(not tested, no variability across samples)
6992	PE(14:0/18:1)	Phosphatidylethanolamine	PE Ester	54538	GC-FID	100010686		1	1		1		1	0		(not tested, no variability across samples)
7067	PE(18:0/14:0)	Phosphatidylethanolamine	PE Ester	54546	GC-FID	100010694		1	1		1		1	0		(not tested, no variability across samples)
6760	PC(14:0/18:3)	Phosphatidylcholine	PC Ester	53294	GC-FID	100009442		0.9275	1.0725		1		0.9275	4.53247e-16		(not tested, almost no variability across samples)
7035	PE(16:0/18:3)	Phosphatidylethanolamine	PE Ester	54183	GC-FID	100010331		1.5573	1.9833		1.7703		0.4513	0.134488		9.80757
7076	PE(18:0/18:3)	Phosphatidylethanolamine	PE Ester	53847	GC-FID	100009995		3.6094	4.7546		4.182		0.748884	0.454132		7.55973
7228	LPE(18:3)	Lysophosphatidylethanolamine	LPE Ester	54517	GC-FID	100010665		2.3152	2.1394		2.2273		0.517816	0.254999		6.70389
6853	PC(18:2/18:3)	Phosphatidylcholine	PC Ester	53835	GC-FID	100009983		2.9072	2.2716		2.5894		1.00083	0.255738		6.21172
7092	PE(18:1/18:3)	Phosphatidylethanolamine	PE Ester	54194	GC-FID	100010342		1	1.6563		1.32815		0.547404	0.127516		6.12274
7566	PI(18:2/18:2)	Phosphatidylinositol	PI Ester	53686	GC-FID	100009834		2.8364	2.576		2.7062		0.742932	0.323665		6.06574
6971	LPC(18:3)	Lysophosphatidylcholine	LPC Ester	54513	GC-FID	100010661		1.4717	1.2359		1.3538		0.54626	0.163811		4.92972
6791	PC(16:0/18:3)	Phosphatidylcholine	PC Ester	53825	GC-FID	100009973		2.6077	2.8245		2.7161		0.955364	0.389063		4.52558
6838	PC(18:1/18:3)	Phosphatidylcholine	PC Ester	54347	GC-FID	100010495		3.094	2.5162		2.8051		1.01123	0.527743		3.39914
8707	TAG48:4-FA16:0	Triacylglycerol	TAG Ester	53362	GC-FID	100009510		6.8717	5.9167		6.3942		1.35363	1.82411		2.7633
6821	PC(18:0/18:3)	Phosphatidylcholine	PC Ester	54164	GC-FID	100010312		2.2029	2.4346		2.31875		1.01652	0.472282		2.75731
8894	TAG50:5-FA18:1	Triacylglycerol	TAG Ester	53553	GC-FID	100009701		5.109	5.0057		5.05735		1.29055	1.46028		2.5795
8721	TAG48:5-FA18:2	Triacylglycerol	TAG Ester	54043	GC-FID	100010191		6.4002	5.4128		5.9065		1.50605	1.87463		2.34738
7536	PI(18:0/18:3)	Phosphatidylinositol	PI Ester	54024	GC-FID	100010172		1.6276	1.0732		1.3504		0.801488	0.235595		2.3299
7499	PI(16:0/18:2)	Phosphatidylinositol	PI Ester	54382	GC-FID	100010530		2.3605	1.8835		2.122		1.03192	0.471993		2.30954
6820	PC(18:0/18:2)	Phosphatidylcholine	PC Ester	54345	GC-FID	100010493		1.6071	1.4965		1.5518		0.985948	0.269619		2.09871
7550	PI(18:1/18:2)	Phosphatidylinositol	PI Ester	53530	GC-FID	100009678		1.825	1.4845		1.65475		0.900812	0.379489		1.98672
8709	TAG48:4-FA18:1	Triacylglycerol	TAG Ester	54404	GC-FID	100010552		5.308	4.7994		5.0537		1.47781	1.84095		1.94242
8575	TAG46:3-FA16:0	Triacylglycerol	TAG Ester	54396	GC-FID	100010544		5.9964	4.9143		5.45535		1.58598	2.10788		1.83567
7535	PI(18:0/18:2)	Phosphatidylinositol	PI Ester	54218	GC-FID	100010366		1.8604	1.4616		1.661		1.02326	0.349645		1.82395
6856	PC(18:2/20:2)	Phosphatidylcholine	PC Ester	53836	GC-FID	100009984		1.437	1.66		1.5485		1.0383	0.2913		1.75146
7505	PI(16:0/20:4)	Phosphatidylinositol	PI Ester	53861	GC-FID	100010009		1.7959	1.8279		1.8119		1.04061	0.443784		1.73798
6852	PC(18:2/18:2)	Phosphatidylcholine	PC Ester	53304	GC-FID	100009452		1.6361	1.4985		1.5673		1.00359	0.334451		1.68547
8706	TAG48:4-FA14:1	Triacylglycerol	TAG Ester	54403	GC-FID	100010551		3.1381	2.9414		3.03975		1.20175	1.12212		1.63797
6788	PC(16:0/18:0)	Phosphatidylcholine	PC Ester	54157	GC-FID	100010305		1.2017	1.2891		1.2454		0.954452	0.177719		1.63712
6851	PC(18:2/16:1)	Phosphatidylcholine	PC Ester	54173	GC-FID	100010321		1.5238	1.3622		1.443		1.02172	0.265417		1.58722
7999	LCER(22:0)	Sphingolipids	Lactosylceramide	53640	GC-FID	100009788		1.5385	1.4215		1.48		1.03004	0.283749		1.58575
6790	PC(16:0/18:2)	Phosphatidylcholine	PC Ester	54341	GC-FID	100010489		1.4242	1.3227		1.37345		0.97412	0.252565		1.58109
6759	PC(14:0/18:2)	Phosphatidylcholine	PC Ester	54152	GC-FID	100010300		1.6155	1.3789		1.4972		0.985172	0.331308		1.54548
7215	PE(P-18:2/18:2)	Phosphatidylethanolamine	PE Plasmalogen	54214	GC-FID	100010362		1.2721	0.7494		1.01075		0.813548	0.130914		1.50635
8708	TAG48:4-FA16:1	Triacylglycerol	TAG Ester	53873	GC-FID	100010021		2.9961	2.848		2.92205		1.24987	1.11114		1.50493
6727	Total PI	Phospholipid SUM	Phosphatidylinositols	54663	GC-FID	100010826		1.4947	1.4473		1.471		1.02496	0.296734		1.50317
6868	PC(20:0/18:2)	Phosphatidylcholine	PC Ester	53307	GC-FID	100009455		1.5386	1.228		1.3833		0.969872	0.2823		1.4645
6863	PC(18:2/22:5)	Phosphatidylcholine	PC Ester	53498	GC-FID	100009646		1.4412	0.9434		1.1923		0.882312	0.212794		1.45675
6786	PC(16:0/16:0)	Phosphatidylcholine	PC Ester	53655	GC-FID	100009803		1.2223	1.3098		1.26605		0.962472	0.209416		1.44964
7175	PE(P-16:0/22:4)	Phosphatidylethanolamine	PE Plasmalogen	54206	GC-FID	100010354		1.4877	1.4405		1.4641		0.983224	0.335656		1.43264
6857	PC(18:2/20:3)	Phosphatidylcholine	PC Ester	53497	GC-FID	100009645		1.3716	1.4286		1.4001		0.994336	0.288903		1.4045
7194	PE(P-18:0/22:4)	Phosphatidylethanolamine	PE Plasmalogen	53680	GC-FID	100009828		1.4682	1.3358		1.402		0.995732	0.290371		1.39914
7556	PI(18:1/20:4)	Phosphatidylinositol	PI Ester	54221	GC-FID	100010369		1.4163	1.5635		1.4899		1.03535	0.326861		1.39065
7107	PE(18:2/18:2)	Phosphatidylethanolamine	PE Ester	53325	GC-FID	100009473		1.3791	1.4879		1.4335		0.866912	0.418036		1.35536
10596	MAG(18:3)	MAG	Ester	62012	GC-FID	100020139		1.4982	1.1653		1.33175		1.02712	0.224793		1.35518
6817	PC(18:0/16:1)	Phosphatidylcholine	PC Ester	53830	GC-FID	100009978		1.7766	1.8669		1.82175		1.10964	0.531927		1.33873
8892	TAG50:5-FA16:1	Triacylglycerol	TAG Ester	53890	GC-FID	100010038		2.3134	2.2177		2.26555		1.19611	0.877921		1.21815
8576	TAG46:3-FA16:1	Triacylglycerol	TAG Ester	54397	GC-FID	100010545		3.6823	3.2455		3.4639		1.62245	1.52278		1.20927
7079	PE(18:0/20:2)	Phosphatidylethanolamine	PE Ester	54012	GC-FID	100010160		1.4833	0.9037		1.1935		0.902984	0.241512		1.20291
8693	TAG48:3-FA14:1	Triacylglycerol	TAG Ester	53883	GC-FID	100010031		3.1134	2.8375		2.97545		1.35819	1.36465		1.18511
7034	PE(16:0/18:2)	Phosphatidylethanolamine	PE Ester	53502	GC-FID	100009650		2.0258	1.3681		1.69695		1.04116	0.569283		1.15195
8490	TAG44:2-FA16:0	Triacylglycerol	TAG Ester	53353	GC-FID	100009501		5.4952	5.0976		5.2964		1.86574	3.01672		1.13722
9128	TAG52:6-FA18:1	Triacylglycerol	TAG Ester	54422	GC-FID	100010570		3.292	2.8075		3.04975		1.38062	1.50886		1.10621
8722	TAG48:5-FA18:3	Triacylglycerol	TAG Ester	53875	GC-FID	100010023		3.208	2.6308		2.9194		1.29336	1.47376		1.10333
6841	PC(18:1/20:2)	Phosphatidylcholine	PC Ester	54171	GC-FID	100010319		1.3533	1.1573		1.2553		0.962088	0.270108		1.08553
7224	LPE(17:0)	Lysophosphatidylethanolamine	LPE Ester	53993	GC-FID	100010141		1.256	1.1643		1.21015		0.951116	0.242915		1.06636
7504	PI(16:0/20:3)	Phosphatidylinositol	PI Ester	53860	GC-FID	100010008		1.7666	1.7152		1.7409		1.07238	0.630683		1.06
7540	PI(18:0/20:3)	Phosphatidylinositol	PI Ester	54025	GC-FID	100010173		1.5695	1.4905		1.53		1.05434	0.464526		1.02397
7541	PI(18:0/20:4)	Phosphatidylinositol	PI Ester	54026	GC-FID	100010174		1.4033	1.499		1.45115		1.07449	0.372392		1.01147
7075	PE(18:0/18:2)	Phosphatidylethanolamine	PE Ester	54011	GC-FID	100010159		1.7948	1.5429		1.66885		1.04628	0.617401		1.00838
8877	TAG50:4-FA16:1	Triacylglycerol	TAG Ester	54052	GC-FID	100010200		1.868	1.7083		1.78815		1.04776	0.735384		1.00681
8895	TAG50:5-FA18:2	Triacylglycerol	TAG Ester	53372	GC-FID	100009520		3.0978	2.782		2.9399		1.4383	1.49796		1.00243
8573	TAG46:3-FA14:1	Triacylglycerol	TAG Ester	53357	GC-FID	100009505		3.5746	2.7906		3.1826		1.47346	1.72091		0.99316
7997	LCER(20:0)	Sphingolipids	Lactosylceramide	53477	GC-FID	100009625		1.1411	1.0867		1.1139		0.912364	0.203242		0.991606
8572	TAG46:3-FA14:0	Triacylglycerol	TAG Ester	54395	GC-FID	100010543		3.5123	2.8615		3.1869		1.41096	1.80967		0.981357
6775	PC(15:0/18:2)	Phosphatidylcholine	PC Ester	54154	GC-FID	100010302		1.3194	1.2683		1.29385		0.951304	0.353648		0.968606
7227	LPE(18:2)	Lysophosphatidylethanolamine	LPE Ester	53817	GC-FID	100009965		1.4204	1.2768		1.3486		0.964532	0.406842		0.944022
7991	HCER(26:0)	Sphingolipids	Hexosylceramide	53811	GC-FID	100009959		1.3305	1.3054		1.31795		1.06142	0.272528		0.941299
8491	TAG44:2-FA16:1	Triacylglycerol	TAG Ester	54033	GC-FID	100010181		3.3579	3.2466		3.30225		1.5589	1.85739		0.9386
8570	TAG46:3-FA12:0	Triacylglycerol	TAG Ester	54038	GC-FID	100010186		3.7139	3.4254		3.56965		1.70007	1.9973		0.936055
7091	PE(18:1/18:2)	Phosphatidylethanolamine	PE Ester	54551	GC-FID	100010699		1.5849	1.4748		1.52985		1.02933	0.540406		0.926196
8695	TAG48:3-FA16:0	Triacylglycerol	TAG Ester	53884	GC-FID	100010032		3.0026	2.8468		2.9247		1.36028	1.70215		0.919086
6825	PC(18:0/20:2)	Phosphatidylcholine	PC Ester	53300	GC-FID	100009448		1.3066	1.198		1.2523		0.959512	0.321945		0.909435
8891	TAG50:5-FA16:0	Triacylglycerol	TAG Ester	54410	GC-FID	100010558		2.7671	2.8		2.78355		1.42027	1.54412		0.882886
8876	TAG50:4-FA16:0	Triacylglycerol	TAG Ester	53371	GC-FID	100009519		2.4544	2.2063		2.33035		1.19457	1.30138		0.872754
7548	PI(18:1/16:1)	Phosphatidylinositol	PI Ester	54220	GC-FID	100010368		1.1927	0.9265		1.0596		0.833476	0.262394		0.861772
6784	PC(16:0/14:0)	Phosphatidylcholine	PC Ester	53490	GC-FID	100009638		1.3838	1.4586		1.4212		1.04194	0.444236		0.853744
8781	TAG49:3-FA15:0	Triacylglycerol	TAG Ester	53547	GC-FID	100009695		2.6815	2.2629		2.4722		1.34282	1.33006		0.84912
6966	LPC(16:1)	Lysophosphatidylcholine	LPC Ester	53479	GC-FID	100009627		1.072	1.2093		1.14065		0.940552	0.236842		0.844857
8783	TAG49:3-FA16:1	Triacylglycerol	TAG Ester	53368	GC-FID	100009516		2.3449	2.1878		2.26635		1.35052	1.09842		0.833773
8579	TAG46:3-FA18:3	Triacylglycerol	TAG Ester	54039	GC-FID	100010187		3.7454	3.5429		3.64415		1.67897	2.39119		0.821844
8879	TAG50:4-FA18:1	Triacylglycerol	TAG Ester	53888	GC-FID	100010036		2.4106	2.2852		2.3479		1.27914	1.3222		0.808317
8009	SM(20:0)	Sphingolipids	Sphingomyelin	53687	GC-FID	100009835		1.2835	1.1859		1.2347		0.981896	0.313972		0.80518
7981	HCER(14:0)	Sphingolipids	Hexosylceramide	53808	GC-FID	100009956		0.681	1.931		1.306		0.994124	0.388406		0.802964
8711	TAG48:4-FA18:3	Triacylglycerol	TAG Ester	53703	GC-FID	100009851		2.6626	2.2886		2.4756		1.35164	1.4213		0.790797
9130	TAG52:6-FA18:3	Triacylglycerol	TAG Ester	54064	GC-FID	100010212		2.5619	2.2944		2.42815		1.36107	1.34965		0.790637
6837	PC(18:1/18:2)	Phosphatidylcholine	PC Ester	53833	GC-FID	100009981		1.2096	1.108		1.1588		0.926296	0.295761		0.78612
8561	TAG46:2-FA14:1	Triacylglycerol	TAG Ester	54574	GC-FID	100010722		2.9237	2.7541		2.8389		1.45662	1.76155		0.784694
8896	TAG50:5-FA18:3	Triacylglycerol	TAG Ester	54411	GC-FID	100010559		2.287	2.171		2.229		1.26562	1.22906		0.783832
6787	PC(16:0/16:1)	Phosphatidylcholine	PC Ester	53491	GC-FID	100009639		1.5683	1.6803		1.6243		1.09213	0.679485		0.783199
8616	TAG47:1-FA16:1	Triacylglycerol	TAG Ester	54577	GC-FID	100010725		3.1272	3.063		3.0951		1.63936	1.86571		0.780259
8863	TAG50:3-FA18:0	Triacylglycerol	TAG Ester	53708	GC-FID	100009856		2.8367	2.5646		2.70065		1.31378	1.78461		0.777127
7033	PE(16:0/18:1)	Phosphatidylethanolamine	PE Ester	54007	GC-FID	100010155		1.41	1.5088		1.4594		0.994756	0.604054		0.769209
8499	TAG44:3-FA18:2	Triacylglycerol	TAG Ester	54391	GC-FID	100010539		4.4881	3.7814		4.13475		1.76117	3.09888		0.765949
9129	TAG52:6-FA18:2	Triacylglycerol	TAG Ester	53387	GC-FID	100009535		2.157	1.8249		1.99095		1.22386	1.00253		0.765153
7144	PE(O-18:0/18:2)	Phosphatidylethanolamine	PE Ether	54368	GC-FID	100010516		1.2554	1.1368		1.1961		0.948024	0.328651		0.75483
8438	TAG42:1-FA16:0	Triacylglycerol	TAG Ester	53351	GC-FID	100009499		4.8892	4.1517		4.52045		2.04142	3.29706		0.751891
9006	TAG51:5-FA18:3	Triacylglycerol	TAG Ester	54416	GC-FID	100010564		2.1066	1.8519		1.97925		1.15147	1.1041		0.749735
9126	TAG52:6-FA16:1	Triacylglycerol	TAG Ester	53386	GC-FID	100009534		2.0663	1.7428		1.90455		1.17607	0.978177		0.744734
8705	TAG48:4-FA14:0	Triacylglycerol	TAG Ester	53361	GC-FID	100009509		2.7184	2.3976		2.558		1.37841	1.58523		0.744113
8888	TAG50:5-FA14:0	Triacylglycerol	TAG Ester	54240	GC-FID	100010388		2.6731	2.693		2.68305		1.45063	1.65657		0.74396
8578	TAG46:3-FA18:2	Triacylglycerol	TAG Ester	54576	GC-FID	100010724		3.2766	2.8807		3.07865		1.57587	2.06027		0.729412
6723	Total PC	Phospholipid SUM	Phosphatidylcholines	54661	GC-FID	100010824		1.1749	1.1146		1.14475		0.98104	0.230789		0.709348
8493	TAG44:2-FA18:2	Triacylglycerol	TAG Ester	54226	GC-FID	100010374		4.6286	4.1299		4.37925		2.15197	3.17143		0.702295
6968	LPC(18:0)	Lysophosphatidylcholine	LPC Ester	54144	GC-FID	100010292		1.122	1.13		1.126		0.991968	0.191047		0.701567
6806	PC(17:0/18:2)	Phosphatidylcholine	PC Ester	54163	GC-FID	100010311		1.223	1.1575		1.19025		0.97342	0.310382		0.698591
8439	TAG42:1-FA16:1	Triacylglycerol	TAG Ester	53691	GC-FID	100009839		3.2712	3.4288		3.35		1.71847	2.33818		0.697778
8627	TAG47:2-FA16:1	Triacylglycerol	TAG Ester	54579	GC-FID	100010727		2.2663	2.6057		2.436		1.4469	1.41983		0.696631
8577	TAG46:3-FA18:1	Triacylglycerol	TAG Ester	54575	GC-FID	100010723		3.6643	3.126		3.39515		1.56734	2.6302		0.694932
8889	TAG50:5-FA14:1	Triacylglycerol	TAG Ester	53889	GC-FID	100010037		2.0124	2.0431		2.02775		1.23944	1.13715		0.693234
8563	TAG46:2-FA16:0	Triacylglycerol	TAG Ester	53356	GC-FID	100009504		3.3444	3.0775		3.21095		1.69173	2.19654		0.691642
6832	PC(18:0/22:5)	Phosphatidylcholine	PC Ester	53662	GC-FID	100009810		1.4702	1.2154		1.3428		1.07144	0.395139		0.686746
8710	TAG48:4-FA18:2	Triacylglycerol	TAG Ester	54042	GC-FID	100010190		2.6361	2.3163		2.4762		1.46955	1.48036		0.680001
8692	TAG48:3-FA14:0	Triacylglycerol	TAG Ester	53551	GC-FID	100009699		2.5278	2.2836		2.4057		1.38162	1.51177		0.677406
8011	SM(22:0)	Sphingolipids	Sphingomyelin	53347	GC-FID	100009495		1.3289	1.2047		1.2668		1.06758	0.296615		0.671659
8481	TAG44:1-FA16:0	Triacylglycerol	TAG Ester	53864	GC-FID	100010012		3.9687	3.3556		3.66215		1.82246	2.74213		0.670901
8564	TAG46:2-FA16:1	Triacylglycerol	TAG Ester	53867	GC-FID	100010015		2.9994	2.8702		2.9348		1.71774	1.86645		0.65207
8586	TAG46:4-FA18:2	Triacylglycerol	TAG Ester	53869	GC-FID	100010017		4.1012	3.8696		3.9854		1.77515	3.42592		0.645154
8696	TAG48:3-FA16:1	Triacylglycerol	TAG Ester	54408	GC-FID	100010556		2.2156	2.079		2.1473		1.3869	1.18483		0.64178
8881	TAG50:4-FA18:3	Triacylglycerol	TAG Ester	53552	GC-FID	100009700		2.0818	2.1122		2.097		1.24942	1.32986		0.637344
6826	PC(18:0/20:3)	Phosphatidylcholine	PC Ester	54531	GC-FID	100010679		1.1154	1.1921		1.15375		0.934916	0.346182		0.632136
9091	TAG52:4-FA18:0	Triacylglycerol	TAG Ester	53382	GC-FID	100009530		2.5687	2.2456		2.40715		1.36352	1.67067		0.624675
8520	TAG45:1-FA16:0	Triacylglycerol	TAG Ester	54573	GC-FID	100010721		2.893	3.2787		3.08585		1.68988	2.23751		0.623898
8492	TAG44:2-FA18:1	Triacylglycerol	TAG Ester	54225	GC-FID	100010373		3.3846	3.1528		3.2687		1.64091	2.62186		0.620852
8782	TAG49:3-FA16:0	Triacylglycerol	TAG Ester	53367	GC-FID	100009515		2.4406	2.1691		2.30485		1.31881	1.5926		0.61914
8005	SM(14:0)	Sphingolipids	Sphingomyelin	54222	GC-FID	100010370		1.1805	1.1678		1.17415		0.985816	0.309704		0.60811
8625	TAG47:2-FA15:0	Triacylglycerol	TAG Ester	54230	GC-FID	100010378		2.5058	2.4749		2.49035		1.4745	1.68145		0.604149
8678	TAG48:2-FA14:1	Triacylglycerol	TAG Ester	53700	GC-FID	100009848		2.3622	2.1805		2.27135		1.35079	1.54134		0.597245
8566	TAG46:2-FA18:1	Triacylglycerol	TAG Ester	54037	GC-FID	100010185		2.4899	2.4262		2.45805		1.40718	1.78152		0.589874
8523	TAG45:1-FA18:1	Triacylglycerol	TAG Ester	53537	GC-FID	100009685		2.9517	3.1923		3.072		1.64058	2.42816		0.589508
8558	TAG46:2-FA12:0	Triacylglycerol	TAG Ester	54035	GC-FID	100010183		3.0444	2.6465		2.84545		1.66056	2.04343		0.579857
7975	DCER(22:1)	Sphingolipids	Dihydroceramide	53804	GC-FID	100016011		1.1814	1.132		1.1567		0.98242	0.300595		0.579783
8861	TAG50:3-FA16:1	Triacylglycerol	TAG Ester	53885	GC-FID	100010033		2.1039	1.8578		1.98085		1.29809	1.17774		0.57972
9158	TAG52:8-FA18:2	Triacylglycerol	TAG Ester	53724	GC-FID	100009872		3.0051	2.4254		2.71525		1.5368	2.03851		0.578091
9075	TAG52:3-FA18:0	Triacylglycerol	TAG Ester	54246	GC-FID	100010394		2.5534	2.2755		2.41445		1.39916	1.75775		0.577608
8990	TAG51:4-FA16:1	Triacylglycerol	TAG Ester	54245	GC-FID	100010393		1.5751	1.4678		1.52145		1.09919	0.731084		0.577578
8787	TAG49:3-FA18:3	Triacylglycerol	TAG Ester	54407	GC-FID	100010555		2.7118	2.2307		2.47125		1.36666	1.9317		0.571826
8623	TAG47:2-FA14:0	Triacylglycerol	TAG Ester	53541	GC-FID	100009689		2.756	2.2942		2.5251		1.52859	1.78942		0.556891
8664	TAG48:1-FA14:1	Triacylglycerol	TAG Ester	54231	GC-FID	100010379		2.571	2.488		2.5295		1.49732	1.85938		0.555122
6858	PC(18:2/20:4)	Phosphatidylcholine	PC Ester	54533	GC-FID	100010681		1.0934	1.0752		1.0843		0.96912	0.208432		0.552601
8683	TAG48:2-FA18:0	Triacylglycerol	TAG Ester	53701	GC-FID	100009849		3.6166	3.0628		3.3397		1.93618	2.54607		0.551249
8699	TAG48:3-FA18:2	Triacylglycerol	TAG Ester	54232	GC-FID	100010380		2.2832	2.071		2.1771		1.44285	1.33402		0.550402
8978	TAG51:3-FA17:0	Triacylglycerol	TAG Ester	53377	GC-FID	100009525		2.4785	2.01		2.24425		1.41464	1.53263		0.541297
8771	TAG49:2-FA17:0	Triacylglycerol	TAG Ester	53366	GC-FID	100009514		2.5536	2.1535		2.35355		1.44113	1.69315		0.53889
8704	TAG48:4-FA12:0	Triacylglycerol	TAG Ester	53702	GC-FID	100009850		2.7292	2.4361		2.58265		1.6741	1.69646		0.535559
8982	TAG51:3-FA18:3	Triacylglycerol	TAG Ester	53712	GC-FID	100009860		2.73	2.5611		2.64555		1.44578	2.2484		0.53361
9106	TAG52:5-FA16:0	Triacylglycerol	TAG Ester	54250	GC-FID	100010398		2.3705	2.0977		2.2341		1.336	1.68954		0.531568
8860	TAG50:3-FA16:0	Triacylglycerol	TAG Ester	54050	GC-FID	100010198		2.3745	2.1964		2.28545		1.41832	1.63291		0.531032
8553	TAG46:1-FA18:0	Triacylglycerol	TAG Ester	54034	GC-FID	100010182		2.7983	2.7972		2.79775		1.51435	2.44069		0.525833
7555	PI(18:1/20:3)	Phosphatidylinositol	PI Ester	54027	GC-FID	100010175		0.8213	1.0082		0.91475		0.751272	0.31339		0.521644
9429	TAG54:8-FA18:3	Triacylglycerol	TAG Ester	53740	GC-FID	100009888		2.472	2.0586		2.2653		1.37747	1.70572		0.520504
7933	CE(18:2)	Cholesterol Ester	CE Ester	53968	GC-FID	100010116		1.2661	1.1211		1.1936		1.05732	0.261976		0.520186
8617	TAG47:1-FA17:0	Triacylglycerol	TAG Ester	53872	GC-FID	100010020		2.2418	1.9787		2.11025		1.37357	1.42614		0.516555
9005	TAG51:5-FA18:2	Triacylglycerol	TAG Ester	54058	GC-FID	100010206		2.0716	1.7403		1.90595		1.26206	1.24717		0.516281
9111	TAG52:5-FA18:2	Triacylglycerol	TAG Ester	54251	GC-FID	100010399		1.9095	1.6866		1.79805		1.23963	1.08383		0.51523
8445	TAG42:2-FA18:2	Triacylglycerol	TAG Ester	53352	GC-FID	100009500		3.9351	3.5673		3.7512		2.06566	3.28792		0.512645
8479	TAG44:1-FA14:1	Triacylglycerol	TAG Ester	54032	GC-FID	100010180		4.1452	3.5624		3.8538		2.06357	3.50088		0.511366
8436	TAG42:1-FA14:0	Triacylglycerol	TAG Ester	53350	GC-FID	100009498		4.0132	3.8195		3.91635		1.8632	4.03542		0.508783
9144	TAG52:7-FA18:1	Triacylglycerol	TAG Ester	54423	GC-FID	100010571		2.4275	2.2885		2.358		1.42054	1.85831		0.504468
8698	TAG48:3-FA18:1	Triacylglycerol	TAG Ester	54585	GC-FID	100010733		2.1655	2.0264		2.09595		1.40692	1.37076		0.50266
9112	TAG52:5-FA18:3	Triacylglycerol	TAG Ester	53720	GC-FID	100009868		2.123	1.8646		1.9938		1.28156	1.41931		0.501824
7496	PI(16:0/16:1)	Phosphatidylinositol	PI Ester	54381	GC-FID	100010529		1.7073	1.4209		1.5641		1.11075	0.91202		0.497081
8994	TAG51:4-FA18:3	Triacylglycerol	TAG Ester	54057	GC-FID	100010205		1.9611	1.9084		1.93475		1.25768	1.37696		0.491718
7099	PE(18:1/22:0)	Phosphatidylethanolamine	PE Ester	55177	GC-FID	100013437		0.9866	0.8839		0.93525		0.797448	0.280258		0.491696
8629	TAG47:2-FA18:1	Triacylglycerol	TAG Ester	53698	GC-FID	100009846		1.8254	1.961		1.8932		1.23937	1.33927		0.488201
8874	TAG50:4-FA14:1	Triacylglycerol	TAG Ester	53887	GC-FID	100010035		1.8708	1.6633		1.76705		1.22667	1.12417		0.480696
8681	TAG48:2-FA16:1	Triacylglycerol	TAG Ester	54402	GC-FID	100010550		2.5692	2.2616		2.4154		1.58102	1.73603		0.480627
8567	TAG46:2-FA18:2	Triacylglycerol	TAG Ester	53868	GC-FID	100010016		2.6915	2.4285		2.56		1.60973	1.99421		0.476514
9340	TAG54:3-FA18:3	Triacylglycerol	TAG Ester	54605	GC-FID	100010753		2.0504	1.9256		1.988		1.31766	1.41205		0.474728
8012	SM(22:1)	Sphingolipids	Sphingomyelin	54570	GC-FID	100010718		1.1953	1.084		1.13965		1.0221	0.250478		0.469286
8786	TAG49:3-FA18:2	Triacylglycerol	TAG Ester	53705	GC-FID	100009853		1.9966	1.6445		1.82055		1.30283	1.10456		0.468713
8630	TAG47:2-FA18:2	Triacylglycerol	TAG Ester	54580	GC-FID	100010728		2.3571	2.2445		2.3008		1.47631	1.76234		0.467838
9125	TAG52:6-FA16:0	Triacylglycerol	TAG Ester	54599	GC-FID	100010747		2.813	2.4503		2.63165		1.56485	2.281		0.46769
8700	TAG48:3-FA18:3	Triacylglycerol	TAG Ester	53544	GC-FID	100009692		2.456	2.2357		2.34585		1.37915	2.07854		0.465085
9110	TAG52:5-FA18:1	Triacylglycerol	TAG Ester	54420	GC-FID	100010568		1.9791	1.7181		1.8486		1.27918	1.22965		0.463076
6732	Total SM	Sphingolipid SUM	Sphingomyelins	54666	GC-FID	100010829		1.1419	1.0924		1.11715		1.01142	0.22886		0.461985
8486	TAG44:2-FA12:0	Triacylglycerol	TAG Ester	53535	GC-FID	100009683		3.9394	3.3095		3.62445		2.18277	3.13904		0.459273
6815	PC(18:0/14:0)	Phosphatidylcholine	PC Ester	54004	GC-FID	100010152		0.9301	0.7603		0.8452		0.802056	0.0944905		0.456596
8690	TAG48:3-FA12:0	Triacylglycerol	TAG Ester	53370	GC-FID	100009518		2.065	1.9879		2.02645		1.39902	1.39108		0.451041
7976	DCER(22:2)	Sphingolipids	Dihydroceramide	57732	GC-FID	100009952		1.3303	1		1.16515		1.01272	0.340129		0.448154
8965	TAG51:2-FA18:0	Triacylglycerol	TAG Ester	54592	GC-FID	100010740		1.7852	1.6295		1.70735		1.24975	1.02433		0.446729
8680	TAG48:2-FA16:0	Triacylglycerol	TAG Ester	53360	GC-FID	100009508		2.473	2.2302		2.3516		1.50473	1.91013		0.443355
8488	TAG44:2-FA14:0	Triacylglycerol	TAG Ester	54224	GC-FID	100010372		4.0037	3.3677		3.6857		2.25412	3.2616		0.438921
8560	TAG46:2-FA14:0	Triacylglycerol	TAG Ester	54036	GC-FID	100010184		2.5019	2.3614		2.43165		1.57902	1.95072		0.437086
9245	TAG53:5-FA18:3	Triacylglycerol	TAG Ester	53730	GC-FID	100009878		1.7023	1.6056		1.65395		1.21265	1.01213		0.43601
7085	PE(18:0/22:4)	Phosphatidylethanolamine	PE Ester	53674	GC-FID	100009822		1.3815	1.7385		1.56		1.21768	0.78637		0.435317
7924	CE(12:0)	Cholesterol Ester	CE Ester	54493	GC-FID	100010641		1.499	1.4302		1.4646		1.09535	0.86465		0.427054
9157	TAG52:8-FA16:1	Triacylglycerol	TAG Ester	53388	GC-FID	100009536		1.9694	2.0766		2.023		1.35976	1.56166		0.424706
8484	TAG44:1-FA18:1	Triacylglycerol	TAG Ester	53695	GC-FID	100009843		2.7018	2.4797		2.59075		1.59658	2.35641		0.421899
9371	TAG54:5-FA18:0	Triacylglycerol	TAG Ester	54440	GC-FID	100010588		2.3597	2.1811		2.2704		1.43706	2.00038		0.416589
6819	PC(18:0/18:1)	Phosphatidylcholine	PC Ester	54530	GC-FID	100010678		1.1066	1.0344		1.0705		0.96706	0.248416		0.416398
8519	TAG45:1-FA15:0	Triacylglycerol	TAG Ester	53536	GC-FID	100009684		2.587	2.4609		2.52395		1.58096	2.28176		0.413273
7180	PE(P-18:0/16:0)	Phosphatidylethanolamine	PE Plasmalogen	53337	GC-FID	100009485		0.8727	1.2357		1.0542		0.9471	0.259687		0.412419
8669	TAG48:1-FA18:0	Triacylglycerol	TAG Ester	53699	GC-FID	100009847		2.3804	2.2746		2.3275		1.55857	1.87177		0.410805
8988	TAG51:4-FA15:0	Triacylglycerol	TAG Ester	53556	GC-FID	100009704		1.9578	1.7367		1.84725		1.32882	1.26605		0.40949
8482	TAG44:1-FA16:1	Triacylglycerol	TAG Ester	54571	GC-FID	100010719		2.6469	2.2247		2.4358		1.60499	2.0614		0.403034
9120	TAG52:5-FA22:5	Triacylglycerol	TAG Ester	53385	GC-FID	100009533		2.4571	2.0551		2.2561		1.50935	1.87286		0.398722
8993	TAG51:4-FA18:2	Triacylglycerol	TAG Ester	53557	GC-FID	100009705		1.857	1.6936		1.7753		1.32479	1.1417		0.394595
8770	TAG49:2-FA16:1	Triacylglycerol	TAG Ester	53546	GC-FID	100009694		2.2555	1.936		2.09575		1.49433	1.53614		0.391513
6965	LPC(16:0)	Lysophosphatidylcholine	LPC Ester	53287	GC-FID	100009435		1.0182	1.0607		1.03945		0.98218	0.147554		0.388128
8440	TAG42:1-FA18:1	Triacylglycerol	TAG Ester	54223	GC-FID	100010371		3.9074	3.1264		3.5169		2.12677	3.62116		0.383891
6793	PC(16:0/20:1)	Phosphatidylcholine	PC Ester	53657	GC-FID	100009805		1.2061	0.9661		1.0861		0.998292	0.23114		0.379891
8551	TAG46:1-FA16:1	Triacylglycerol	TAG Ester	53540	GC-FID	100009688		3.1154	2.809		2.9622		1.87752	2.86173		0.379031
7498	PI(16:0/18:1)	Phosphatidylinositol	PI Ester	53344	GC-FID	100009492		1.041	1.1923		1.11665		0.966592	0.396502		0.378455
8677	TAG48:2-FA14:0	Triacylglycerol	TAG Ester	54583	GC-FID	100010731		2.4028	2.2476		2.3252		1.55552	2.03558		0.378114
8769	TAG49:2-FA16:0	Triacylglycerol	TAG Ester	54234	GC-FID	100010382		2.2519	1.9954		2.12365		1.44861	1.7901		0.377095
8848	TAG50:2-FA18:0	Triacylglycerol	TAG Ester	54049	GC-FID	100010197		2.4297	2.0809		2.2553		1.48748	2.03923		0.376522
8768	TAG49:2-FA15:0	Triacylglycerol	TAG Ester	53877	GC-FID	100010025		2.3471	1.8415		2.0943		1.44862	1.72538		0.374225
8614	TAG47:1-FA15:0	Triacylglycerol	TAG Ester	53358	GC-FID	100009506		2.6994	2.5149		2.60715		1.73775	2.33343		0.372583
8550	TAG46:1-FA16:0	Triacylglycerol	TAG Ester	53355	GC-FID	100009503		2.6013	2.2471		2.4242		1.59747	2.22794		0.371074
7972	DCER(20:0)	Sphingolipids	Dihydroceramide	53280	GC-FID	100009428		1.0178	1.1652		1.0915		1.00042	0.246177		0.369962
8024	DAG(14:0/14:0)	Diacylglycerol	DAG Ester	53270	GC-FID	100009418		1.2226	1.0247		1.12365		0.873512	0.676925		0.369521
7126	PE(O-16:0/18:2)	Phosphatidylethanolamine	PE Ether	53850	GC-FID	100009998		0.968	0.9114		0.9397		0.827196	0.305808		0.367891
9412	TAG54:7-FA18:2	Triacylglycerol	TAG Ester	54075	GC-FID	100010223		1.9709	1.8795		1.9252		1.35344	1.55999		0.366517
7216	PE(P-18:2/20:4)	Phosphatidylethanolamine	PE Plasmalogen	54215	GC-FID	100010363		1.0331	1.0336		1.03335		0.921756	0.304911		0.365989
8006	SM(16:0)	Sphingolipids	Sphingomyelin	54385	GC-FID	100010533		1.0801	1.0782		1.07915		0.995324	0.229484		0.36528
7510	PI(16:0/22:5)	Phosphatidylinositol	PI Ester	53527	GC-FID	100009675		0.806	1.1565		0.98125		0.899416	0.225145		0.363472
8756	TAG49:1-FA16:1	Triacylglycerol	TAG Ester	53545	GC-FID	100009693		2.9627	2.1863		2.5745		1.72286	2.34802		0.362706
8067	DAG(16:1/18:2)	Diacylglycerol	DAG Ester	53632	GC-FID	100009780		1.8154	1.6902		1.7528		1.35357	1.10495		0.361311
9230	TAG53:4-FA18:3	Triacylglycerol	TAG Ester	53729	GC-FID	100009877		1.974	1.7749		1.87445		1.31743	1.54676		0.360122
8476	TAG44:1-FA12:0	Triacylglycerol	TAG Ester	54390	GC-FID	100010538		3.6062	3.2987		3.45245		2.26508	3.31355		0.358337
9078	TAG52:3-FA18:3	Triacylglycerol	TAG Ester	53897	GC-FID	100010045		2.1332	1.9304		2.0318		1.35393	1.89667		0.3574
7223	LPE(16:1)	Lysophosphatidylethanolamine	LPE Ester	54147	GC-FID	100010295		1.2987	1.4104		1.35455		1.12201	0.652921		0.35615
8992	TAG51:4-FA18:1	Triacylglycerol	TAG Ester	54415	GC-FID	100010563		1.3066	1.2507		1.27865		1.1157	0.458008		0.355788
8545	TAG46:1-FA12:0	Triacylglycerol	TAG Ester	53866	GC-FID	100010014		2.6732	2.4954		2.5843		1.74965	2.34973		0.355211
8880	TAG50:4-FA18:2	Triacylglycerol	TAG Ester	54053	GC-FID	100010201		1.7657	1.6932		1.72945		1.32815	1.1373		0.352851
7937	CE(20:1)	Cholesterol Ester	CE Ester	54318	GC-FID	100010466		0.8374	1.4199		1.12865		0.989496	0.397175		0.35036
8010	SM(20:1)	Sphingolipids	Sphingomyelin	53531	GC-FID	100009679		1.1315	1.0833		1.1074		1.01669	0.259675		0.349313
8977	TAG51:3-FA16:1	Triacylglycerol	TAG Ester	53376	GC-FID	100009524		1.7542	1.4545		1.60435		1.2441	1.03671		0.347488
8661	TAG48:1-FA12:0	Triacylglycerol	TAG Ester	53542	GC-FID	100009690		2.1878	2.0415		2.11465		1.49067	1.81058		0.344631
8675	TAG48:2-FA12:0	Triacylglycerol	TAG Ester	54582	GC-FID	100010730		2.0991	1.9882		2.04365		1.51714	1.53487		0.34303
8068	DAG(16:1/18:3)	Diacylglycerol	DAG Ester	53981	GC-FID	100010129		1.668	1.65		1.659		1.28488	1.09897		0.340428
8967	TAG51:2-FA18:2	Triacylglycerol	TAG Ester	54413	GC-FID	100010561		2.3979	2.2257		2.3118		1.60937	2.06673		0.339874
7988	HCER(22:1)	Sphingolipids	Hexosylceramide	53474	GC-FID	100009622		1.131	1.1693		1.15015		1.02704	0.366192		0.336179
8865	TAG50:3-FA18:2	Triacylglycerol	TAG Ester	53886	GC-FID	100010034		1.7226	1.5942		1.6584		1.26281	1.19401		0.331313
8774	TAG49:2-FA18:2	Triacylglycerol	TAG Ester	54047	GC-FID	100010195		2.0948	1.7588		1.9268		1.37165	1.67996		0.330455
8685	TAG48:2-FA18:2	Triacylglycerol	TAG Ester	54041	GC-FID	100010189		2.1508	1.9748		2.0628		1.44431	1.88313		0.328439
8938	TAG51:0-FA18:0	Triacylglycerol	TAG Ester	53554	GC-FID	100009702		2.8685	2.4447		2.6566		1.73516	2.80798		0.32815
9092	TAG52:4-FA18:1	Triacylglycerol	TAG Ester	53898	GC-FID	100010046		1.6734	1.5304		1.6019		1.21628	1.18092		0.326545
8014	SM(24:1)	Sphingolipids	Sphingomyelin	54028	GC-FID	100010176		1.1497	1.0988		1.12425		1.05355	0.21688		0.325978
9100	TAG52:4-FA22:1	Triacylglycerol	TAG Ester	54598	GC-FID	100010746		1.7685	1.6082		1.68835		1.25394	1.33728		0.324846
9394	TAG54:6-FA18:3	Triacylglycerol	TAG Ester	53739	GC-FID	100009887		1.8828	1.6931		1.78795		1.33527	1.40521		0.322146
9428	TAG54:8-FA18:2	Triacylglycerol	TAG Ester	53400	GC-FID	100009548		2.1639	1.8214		1.99265		1.4576	1.66794		0.320786
9413	TAG54:7-FA18:3	Triacylglycerol	TAG Ester	53398	GC-FID	100009546		2.0426	1.8767		1.95965		1.42308	1.68175		0.319052
7074	PE(18:0/18:1)	Phosphatidylethanolamine	PE Ester	54548	GC-FID	100010696		1.225	1.3283		1.27665		1.07308	0.646452		0.314903
8873	TAG50:4-FA14:0	Triacylglycerol	TAG Ester	54589	GC-FID	100010737		1.9526	1.8742		1.9134		1.47624	1.38969		0.314577
6831	PC(18:0/22:4)	Phosphatidylcholine	PC Ester	53831	GC-FID	100009979		1.1661	1.0738		1.11995		0.986616	0.425417		0.31342
8843	TAG50:2-FA14:1	Triacylglycerol	TAG Ester	53369	GC-FID	100009517		1.8433	1.6137		1.7285		1.23921	1.57759		0.310153
7961	CER(26:0)	Sphingolipids	Ceramide	54497	GC-FID	100010645		1.2102	1.4034		1.3068		1.14386	0.525771		0.309899
9088	TAG52:4-FA16:0	Triacylglycerol	TAG Ester	54249	GC-FID	100010397		1.8774	1.7477		1.81255		1.39571	1.34802		0.309223
8478	TAG44:1-FA14:0	Triacylglycerol	TAG Ester	53694	GC-FID	100009842		3.5031	2.8277		3.1654		2.17821	3.20689		0.307833
8964	TAG51:2-FA17:0	Triacylglycerol	TAG Ester	54056	GC-FID	100010204		2.1845	2.0353		2.1099		1.52843	1.89829		0.306311
7176	PE(P-16:0/22:5)	Phosphatidylethanolamine	PE Plasmalogen	53521	GC-FID	100009669		1.1756	1.229		1.2023		1.06977	0.434814		0.304792
6801	PC(16:0/22:5)	Phosphatidylcholine	PC Ester	54529	GC-FID	100010677		1.3107	0.9621		1.1364		1.03707	0.328596		0.302292
9095	TAG52:4-FA20:0	Triacylglycerol	TAG Ester	53383	GC-FID	100009531		2.0516	1.8607		1.95615		1.4828	1.57318		0.300888
9226	TAG53:4-FA17:0	Triacylglycerol	TAG Ester	54426	GC-FID	100010574		1.8523	1.7023		1.7773		1.38184	1.31651		0.300388
8615	TAG47:1-FA16:0	Triacylglycerol	TAG Ester	54398	GC-FID	100010546		2.4907	2.2838		2.38725		1.71071	2.29164		0.295221
9060	TAG52:2-FA18:0	Triacylglycerol	TAG Ester	53380	GC-FID	100009528		2.0929	1.8887		1.9908		1.41903	1.97849		0.288994
8056	DAG(16:0/18:3)	Diacylglycerol	DAG Ester	53979	GC-FID	100010127		2.0476	1.8065		1.92705		1.35612	1.98352		0.287838
8684	TAG48:2-FA18:1	Triacylglycerol	TAG Ester	54584	GC-FID	100010732		2.0528	1.8716		1.9622		1.51608	1.55027		0.287772
8547	TAG46:1-FA14:0	Triacylglycerol	TAG Ester	53696	GC-FID	100009844		2.6203	2.4317		2.526		1.77942	2.60273		0.286843
10588	MAG(14:1)	MAG	Ester	62004	GC-FID	100020131		1.1053	0.9114		1.00835		0.959112	0.172093		0.286113
9411	TAG54:7-FA18:1	Triacylglycerol	TAG Ester	53573	GC-FID	100009721		2.0042	1.8359		1.92005		1.44815	1.65474		0.285182
8619	TAG47:1-FA18:1	Triacylglycerol	TAG Ester	54578	GC-FID	100010726		2.2536	2.0214		2.1375		1.55866	2.03437		0.284528
8537	TAG46:0-FA12:0	Triacylglycerol	TAG Ester	53538	GC-FID	100009686		2.7515	2.4657		2.6086		1.86106	2.6298		0.284257
8951	TAG51:1-FA18:0	Triacylglycerol	TAG Ester	54591	GC-FID	100010739		2.0951	2.009		2.05205		1.4609	2.12646		0.277999
8884	TAG50:4-FA20:3	Triacylglycerol	TAG Ester	54239	GC-FID	100010387		1.5991	1.5977		1.5984		1.30574	1.05492		0.277424
9377	TAG54:5-FA20:2	Triacylglycerol	TAG Ester	53396	GC-FID	100009544		1.5102	1.3521		1.43115		1.18689	0.884558		0.27614
9358	TAG54:4-FA20:1	Triacylglycerol	TAG Ester	54263	GC-FID	100010411		1.5155	1.5807		1.5481		1.24363	1.11122		0.273999
9200	TAG53:2-FA18:0	Triacylglycerol	TAG Ester	53726	GC-FID	100009874		1.5312	1.4118		1.4715		1.20123	0.987864		0.273592
9283	TAG54:0-FA18:0	Triacylglycerol	TAG Ester	54068	GC-FID	100010216		2.0309	2.1896		2.11025		1.47351	2.36958		0.268713
8001	LCER(24:0)	Sphingolipids	Lactosylceramide	53989	GC-FID	100010137		0.958	1.1099		1.03395		0.955888	0.291546		0.267752
8409	TAG40:0-FA14:0	Triacylglycerol	TAG Ester	53349	GC-FID	100009497		4.2138	4.5352		4.3745		2.71651	6.19407		0.267673
8080	DAG(18:0/18:3)	Diacylglycerol	DAG Ester	53982	GC-FID	100010130		1.9853	1.7261		1.8557		1.40921	1.67403		0.266716
6847	PC(18:1/22:4)	Phosphatidylcholine	PC Ester	53834	GC-FID	100009982		0.9372	0.872		0.9046		0.850232	0.206177		0.263696
9107	TAG52:5-FA16:1	Triacylglycerol	TAG Ester	54063	GC-FID	100010211		1.3597	1.2088		1.28425		1.09352	0.72926		0.261534
9392	TAG54:6-FA18:1	Triacylglycerol	TAG Ester	54072	GC-FID	100010220		1.8977	1.6656		1.78165		1.35978	1.61706		0.260885
8757	TAG49:1-FA17:0	Triacylglycerol	TAG Ester	54045	GC-FID	100010193		2.1238	1.9204		2.0221		1.4903	2.05201		0.259159
9093	TAG52:4-FA18:2	Triacylglycerol	TAG Ester	54597	GC-FID	100010745		1.6075	1.5803		1.5939		1.28849	1.18427		0.257891
8667	TAG48:1-FA16:1	Triacylglycerol	TAG Ester	53543	GC-FID	100009691		3.0911	2.8003		2.9457		2.08163	3.35335		0.257674
9202	TAG53:2-FA18:2	Triacylglycerol	TAG Ester	53727	GC-FID	100009875		2.1575	1.8152		1.98635		1.50014	1.89459		0.256631
8963	TAG51:2-FA16:1	Triacylglycerol	TAG Ester	53375	GC-FID	100009523		1.8581	1.7172		1.78765		1.42146	1.43785		0.254681
8989	TAG51:4-FA16:0	Triacylglycerol	TAG Ester	54414	GC-FID	100010562		1.1613	1.1263		1.1438		1.07508	0.276539		0.248485
8000	LCER(22:1)	Sphingolipids	Lactosylceramide	54142	GC-FID	100010290		1.0197	1.0965		1.0581		0.991576	0.268942		0.247355
8034	DAG(14:0/20:0)	Diacylglycerol	DAG Ester	53974	GC-FID	100010122		1.232	1		1.116		0.998008	0.479278		0.246187
8008	SM(18:1)	Sphingolipids	Sphingomyelin	53862	GC-FID	100010010		1.1713	1.1672		1.16925		1.09665	0.296019		0.245248
8612	TAG47:1-FA14:0	Triacylglycerol	TAG Ester	53871	GC-FID	100010019		2.8373	2.3739		2.6056		1.93878	2.75122		0.242372
8747	TAG49:0-FA18:0	Triacylglycerol	TAG Ester	53363	GC-FID	100009511		2.7478	2.4578		2.6028		1.85898	3.07395		0.241975
8866	TAG50:3-FA18:3	Triacylglycerol	TAG Ester	54051	GC-FID	100010199		2.3576	2.1355		2.24655		1.5755	2.77344		0.241956
8766	TAG49:2-FA14:0	Triacylglycerol	TAG Ester	54046	GC-FID	100010194		1.8922	1.5799		1.73605		1.35782	1.57338		0.240393
9356	TAG54:4-FA18:3	Triacylglycerol	TAG Ester	54436	GC-FID	100010584		2.2078	1.8577		2.03275		1.52707	2.10372		0.240375
8912	TAG50:6-FA20:4	Triacylglycerol	TAG Ester	54055	GC-FID	100010203		2.0643	1.7654		1.91485		1.47218	1.84568		0.239839
8832	TAG50:1-FA16:1	Triacylglycerol	TAG Ester	54236	GC-FID	100010384		2.2207	1.9762		2.09845		1.58418	2.16564		0.237466
8432	TAG42:0-FA16:0	Triacylglycerol	TAG Ester	53690	GC-FID	100009838		3.2265	2.9956		3.11105		2.17166	3.97888		0.236094
8947	TAG51:1-FA15:0	Triacylglycerol	TAG Ester	53373	GC-FID	100009521		1.7934	1.5896		1.6915		1.30618	1.65845		0.232335
8845	TAG50:2-FA16:0	Triacylglycerol	TAG Ester	54586	GC-FID	100010734		2.2296	1.9619		2.09575		1.60562	2.1119		0.232078
8051	DAG(16:0/16:1)	Diacylglycerol	DAG Ester	53978	GC-FID	100010126		1.9229	2.2557		2.0893		1.65084	1.92135		0.228206
8554	TAG46:1-FA18:1	Triacylglycerol	TAG Ester	54394	GC-FID	100010542		2.1409	1.9843		2.0626		1.61768	1.95078		0.228075
8019	DAG(12:0/18:0)	Diacylglycerol	DAG Ester	53973	GC-FID	100010121		0.6257	1		0.81285		0.740648	0.316772		0.227931
9094	TAG52:4-FA18:3	Triacylglycerol	TAG Ester	54419	GC-FID	100010567		1.7428	1.5538		1.6483		1.28914	1.59765		0.224803
8511	TAG45:0-FA15:0	Triacylglycerol	TAG Ester	53865	GC-FID	100010013		3.5239	3.3283		3.4261		2.40566	4.5658		0.223497
7080	PE(18:0/20:3)	Phosphatidylethanolamine	PE Ester	54549	GC-FID	100010697		1.0432	1.1559		1.09955		0.979428	0.540552		0.222221
8606	TAG47:0-FA16:0	Triacylglycerol	TAG Ester	53697	GC-FID	100009845		2.6735	2.8071		2.7403		1.99237	3.36785		0.22208
8981	TAG51:3-FA18:2	Triacylglycerol	TAG Ester	54244	GC-FID	100010392		1.7138	1.5078		1.6108		1.32336	1.29527		0.221916
7113	PE(18:2/20:4)	Phosphatidylethanolamine	PE Ester	54555	GC-FID	100010703		1.0302	0.791		0.9106		0.872548	0.175047		0.217381
8654	TAG48:0-FA14:0	Triacylglycerol	TAG Ester	54399	GC-FID	100010547		2.5336	2.5332		2.5334		1.88134	3.0305		0.215167
9142	TAG52:7-FA16:0	Triacylglycerol	TAG Ester	53564	GC-FID	100009712		2.3399	2.1866		2.26325		1.68364	2.69531		0.215043
8410	TAG40:0-FA16:0	Triacylglycerol	TAG Ester	53689	GC-FID	100009837		2.2469	2.2879		2.2674		1.63072	2.98042		0.213619
8543	TAG46:0-FA18:0	Triacylglycerol	TAG Ester	53539	GC-FID	100009687		2.8061	2.7853		2.7957		2.10429	3.2564		0.212324
8079	DAG(18:0/18:2)	Diacylglycerol	DAG Ester	53273	GC-FID	100009421		1.8098	1.5004		1.6551		1.32033	1.58868		0.210723
8512	TAG45:0-FA16:0	Triacylglycerol	TAG Ester	54572	GC-FID	100010720		2.8427	2.8533		2.848		2.09376	3.59079		0.210048
7090	PE(18:1/18:1)	Phosphatidylethanolamine	PE Ester	53321	GC-FID	100009469		1.3088	1.459		1.3839		1.19823	0.885525		0.209674
8031	DAG(14:0/18:2)	Diacylglycerol	DAG Ester	54128	GC-FID	100010276		1.8718	1.6496		1.7607		1.4284	1.58804		0.209252
8975	TAG51:3-FA15:0	Triacylglycerol	TAG Ester	54593	GC-FID	100010741		1.6482	1.4622		1.5552		1.30098	1.21809		0.208704
8864	TAG50:3-FA18:1	Triacylglycerol	TAG Ester	54409	GC-FID	100010557		1.6526	1.4819		1.56725		1.31413	1.21456		0.208403
7530	PI(18:0/16:0)	Phosphatidylinositol	PI Ester	53345	GC-FID	100009493		1.1923	0.8581		1.0252		0.937372	0.423875		0.207203
8470	TAG44:0-FA14:0	Triacylglycerol	TAG Ester	54389	GC-FID	100010537		4.0658	3.4811		3.77345		2.7499	5.14823		0.198816
7979	DCER(26:0)	Sphingolipids	Dihydroceramide	53634	GC-FID	100009782		1.5301	1.0067		1.2684		1.14597	0.616395		0.198626
7938	CE(20:2)	Cholesterol Ester	CE Ester	53624	GC-FID	100009772		1.1358	1.0164		1.0761		1.01488	0.309066		0.198094
8038	DAG(14:1/18:1)	Diacylglycerol	DAG Ester	54325	GC-FID	100010473		1.1884	1.1442		1.1663		1.07954	0.438321		0.197937
8858	TAG50:3-FA14:1	Triacylglycerol	TAG Ester	54587	GC-FID	100010735		1.6368	1.5092		1.573		1.29458	1.41705		0.196476
8472	TAG44:0-FA16:0	Triacylglycerol	TAG Ester	54031	GC-FID	100010179		2.6587	2.4369		2.5478		1.93163	3.14514		0.195911
8510	TAG45:0-FA14:0	Triacylglycerol	TAG Ester	54392	GC-FID	100010540		3.3748	3.4252		3.4		2.45848	4.81864		0.195391
9323	TAG54:2-FA18:2	Triacylglycerol	TAG Ester	54432	GC-FID	100010580		1.9103	1.7663		1.8383		1.44078	2.07081		0.191964
8834	TAG50:1-FA18:0	Triacylglycerol	TAG Ester	54237	GC-FID	100010385		2.1342	1.9394		2.0368		1.58474	2.35679		0.191812
8027	DAG(14:0/16:1)	Diacylglycerol	DAG Ester	54498	GC-FID	100010646		1.3943	1.6314		1.51285		1.33175	0.946344		0.191366
8846	TAG50:2-FA16:1	Triacylglycerol	TAG Ester	53881	GC-FID	100010029		1.7471	1.532		1.63955		1.35359	1.53263		0.186583
8020	DAG(12:0/18:1)	Diacylglycerol	DAG Ester	53799	GC-FID	100009947		1.4575	1.7845		1.621		1.40394	1.16679		0.186035
8604	TAG47:0-FA14:0	Triacylglycerol	TAG Ester	54228	GC-FID	100010376		2.8071	2.6057		2.7064		2.07723	3.45695		0.182002
6835	PC(18:1/16:1)	Phosphatidylcholine	PC Ester	54346	GC-FID	100010494		1.0607	0.9551		1.0079		0.9732	0.192906		0.17988
8468	TAG44:0-FA12:0	Triacylglycerol	TAG Ester	53693	GC-FID	100009841		2.6948	2.3278		2.5113		1.97157	3.03961		0.177565
9062	TAG52:2-FA18:2	Triacylglycerol	TAG Ester	53895	GC-FID	100010043		1.7791	1.6798		1.72945		1.42118	1.74161		0.177003
8070	DAG(16:1/20:2)	Diacylglycerol	DAG Ester	54131	GC-FID	100010279		1.4451	1.2608		1.35295		1.183	0.961544		0.176747
9041	TAG52:1-FA16:1	Triacylglycerol	TAG Ester	53379	GC-FID	100009527		1.7317	1.6812		1.70645		1.40902	1.68722		0.176284
7956	CER(20:1)	Sphingolipids	Ceramide	53972	GC-FID	100010120		1.1321	0.6918		0.91195		0.847784	0.365026		0.175785
8773	TAG49:2-FA18:1	Triacylglycerol	TAG Ester	54406	GC-FID	100010554		1.6003	1.4061		1.5032		1.28432	1.25083		0.17499
8962	TAG51:2-FA16:0	Triacylglycerol	TAG Ester	53374	GC-FID	100009522		1.8041	1.6865		1.7453		1.45527	1.67508		0.173143
8755	TAG49:1-FA16:0	Triacylglycerol	TAG Ester	53876	GC-FID	100010024		2.0234	1.8232		1.9233		1.54215	2.20661		0.17273
9079	TAG52:3-FA20:0	Triacylglycerol	TAG Ester	53561	GC-FID	100009709		1.6621	1.4587		1.5604		1.31586	1.42297		0.171849
8948	TAG51:1-FA16:0	Triacylglycerol	TAG Ester	53710	GC-FID	100009858		1.9732	1.825		1.8991		1.51262	2.2555		0.171352
8744	TAG49:0-FA15:0	Triacylglycerol	TAG Ester	53704	GC-FID	100009852		2.4234	1.9232		2.1733		1.73634	2.55448		0.171058
8541	TAG46:0-FA16:0	Triacylglycerol	TAG Ester	53354	GC-FID	100009502		3.3356	2.9033		3.11945		2.38892	4.28235		0.17059
7989	HCER(24:0)	Sphingolipids	Hexosylceramide	54511	GC-FID	100010659		0.9725	1.1103		1.0414		0.995324	0.277154		0.166247
9076	TAG52:3-FA18:1	Triacylglycerol	TAG Ester	54594	GC-FID	100010742		1.4286	1.335		1.3818		1.21287	1.01792		0.165954
9229	TAG53:4-FA18:2	Triacylglycerol	TAG Ester	54256	GC-FID	100010404		1.4351	1.2988		1.36695		1.20374	0.985619		0.165595
9359	TAG54:4-FA20:2	Triacylglycerol	TAG Ester	53908	GC-FID	100010056		1.5122	1.3459		1.42905		1.2739	0.937488		0.165491
9031	TAG52:0-FA18:0	Triacylglycerol	TAG Ester	53892	GC-FID	100010040		2.1914	1.9225		2.05695		1.58689	2.85652		0.164557
8658	TAG48:0-FA18:0	Triacylglycerol	TAG Ester	54400	GC-FID	100010548		2.6105	2.5012		2.55585		2.01533	3.28728		0.164427
8605	TAG47:0-FA15:0	Triacylglycerol	TAG Ester	54229	GC-FID	100010377		2.6204	2.3153		2.46785		1.9458	3.22396		0.16193
8937	TAG51:0-FA17:0	Triacylglycerol	TAG Ester	53709	GC-FID	100009857		2.1441	1.9924		2.06825		1.62472	2.78531		0.159238
8936	TAG51:0-FA16:0	Triacylglycerol	TAG Ester	54242	GC-FID	100010390		2.1392	1.8921		2.01565		1.6016	2.61154		0.158546
6724	Total LPC	Phospholipid SUM	Lysophosphatidylcholines	54664	GC-FID	100010827		0.9977	1.0219		1.0098		0.985524	0.154821		0.1568
8818	TAG50:0-FA14:0	Triacylglycerol	TAG Ester	53706	GC-FID	100009854		2.2228	1.9021		2.06245		1.65796	2.58184		0.156669
8666	TAG48:1-FA16:0	Triacylglycerol	TAG Ester	53359	GC-FID	100009507		2.2567	2.0207		2.1387		1.7266	2.63157		0.156598
8053	DAG(16:0/18:0)	Diacylglycerol	DAG Ester	54500	GC-FID	100010648		1.5521	1.8737		1.7129		1.45741	1.64652		0.155169
9353	TAG54:4-FA18:0	Triacylglycerol	TAG Ester	53907	GC-FID	100010055		1.7247	1.5873		1.656		1.39346	1.70698		0.153804
8607	TAG47:0-FA17:0	Triacylglycerol	TAG Ester	53870	GC-FID	100010018		2.1772	1.8711		2.02415		1.69749	2.13607		0.152925
8013	SM(24:0)	Sphingolipids	Sphingomyelin	53863	GC-FID	100010011		1.1416	1.0821		1.11185		1.07686	0.229652		0.152361
8663	TAG48:1-FA14:0	Triacylglycerol	TAG Ester	54040	GC-FID	100010188		2.0307	1.84		1.93535		1.58111	2.32601		0.152295
8430	TAG42:0-FA14:0	Triacylglycerol	TAG Ester	54029	GC-FID	100010177		3.7365	3.4067		3.5716		2.71104	5.70095		0.15095
9186	TAG53:1-FA18:0	Triacylglycerol	TAG Ester	54424	GC-FID	100010572		1.8699	1.7794		1.82465		1.47379	2.32574		0.150859
8745	TAG49:0-FA16:0	Triacylglycerol	TAG Ester	54044	GC-FID	100010192		2.5773	2.312		2.44465		1.93997	3.36614		0.149928
9374	TAG54:5-FA18:3	Triacylglycerol	TAG Ester	54441	GC-FID	100010589		1.8467	1.5673		1.707		1.46277	1.65294		0.147754
8850	TAG50:2-FA18:2	Triacylglycerol	TAG Ester	53882	GC-FID	100010030		2.2402	1.8409		2.04055		1.67315	2.49581		0.147206
8980	TAG51:3-FA18:1	Triacylglycerol	TAG Ester	53378	GC-FID	100009526		1.1987	1.1246		1.16165		1.10229	0.405008		0.14657
8752	TAG49:1-FA14:0	Triacylglycerol	TAG Ester	54233	GC-FID	100010381		2.1307	1.7688		1.94975		1.60614	2.37639		0.144595
9072	TAG52:3-FA16:0	Triacylglycerol	TAG Ester	53381	GC-FID	100009529		1.4919	1.3645		1.4282		1.26554	1.13426		0.143402
9077	TAG52:3-FA18:2	Triacylglycerol	TAG Ester	54247	GC-FID	100010395		1.4521	1.3619		1.407		1.24989	1.11281		0.141185
7951	CER(16:0)	Sphingolipids	Ceramide	53971	GC-FID	100010119		1.0842	1.2649		1.17455		1.11387	0.432797		0.1402
9097	TAG52:4-FA20:2	Triacylglycerol	TAG Ester	53899	GC-FID	100010047		1.451	1.3705		1.41075		1.27418	0.982032		0.139073
8539	TAG46:0-FA14:0	Triacylglycerol	TAG Ester	54393	GC-FID	100010541		3.2707	3.1007		3.1857		2.5511	4.65091		0.136447
8670	TAG48:1-FA18:1	Triacylglycerol	TAG Ester	54401	GC-FID	100010549		1.8188	1.7104		1.7646		1.49008	2.02978		0.135244
8065	DAG(16:1/18:0)	Diacylglycerol	DAG Ester	54129	GC-FID	100010277		1.1751	1.4016		1.28835		1.20039	0.652541		0.134793
9216	TAG53:3-FA18:2	Triacylglycerol	TAG Ester	53390	GC-FID	100009538		1.6714	1.5196		1.5955		1.39882	1.46244		0.134485
9211	TAG53:3-FA16:0	Triacylglycerol	TAG Ester	54255	GC-FID	100010403		2.0652	1.714		1.8896		1.59818	2.22218		0.13114
7943	CE(22:1)	Cholesterol Ester	CE Ester	53796	GC-FID	100009944		1.288	0.9207		1.10435		1.06005	0.338722		0.130791
7934	CE(18:3)	Cholesterol Ester	CE Ester	53969	GC-FID	100010117		1.2709	1.0028		1.13685		1.07943	0.439905		0.130524
6842	PC(18:1/20:3)	Phosphatidylcholine	PC Ester	54532	GC-FID	100010680		1.0149	0.9893		1.0021		0.962992	0.30288		0.129121
7982	HCER(16:0)	Sphingolipids	Hexosylceramide	53809	GC-FID	100009957		1.1018	1.1451		1.12345		1.07932	0.345692		0.127657
9325	TAG54:2-FA20:0	Triacylglycerol	TAG Ester	53905	GC-FID	100010053		1.2595	1.5201		1.3898		1.22	1.36595		0.124306
7155	PE(O-18:0/22:5)	Phosphatidylethanolamine	PE Ether	54370	GC-FID	100010518		1.0587	1.1359		1.0973		1.05782	0.331344		0.119151
9381	TAG54:5-FA22:1	Triacylglycerol	TAG Ester	54442	GC-FID	100010590		1.4534	1.4632		1.4583		1.28884	1.45355		0.116584
8754	TAG49:1-FA15:0	Triacylglycerol	TAG Ester	53364	GC-FID	100009512		2.0345	1.6889		1.8617		1.59408	2.30484		0.116112
7539	PI(18:0/20:2)	Phosphatidylinositol	PI Ester	53528	GC-FID	100009676		1.2007	0.9131		1.0569		1.0061	0.43868		0.115811
8952	TAG51:1-FA18:1	Triacylglycerol	TAG Ester	53891	GC-FID	100010039		1.6876	1.5797		1.63365		1.4084	1.95817		0.115033
9089	TAG52:4-FA16:1	Triacylglycerol	TAG Ester	54062	GC-FID	100010210		1.2469	1.1218		1.18435		1.10206	0.724651		0.113553
7984	HCER(18:1)	Sphingolipids	Hexosylceramide	53810	GC-FID	100009958		1.0909	1.1399		1.1154		1.07356	0.371085		0.11274
9393	TAG54:6-FA18:2	Triacylglycerol	TAG Ester	54073	GC-FID	100010221		1.6613	1.4944		1.57785		1.39362	1.64602		0.111927
9080	TAG52:3-FA20:1	Triacylglycerol	TAG Ester	53562	GC-FID	100009710		1.5356	1.3684		1.452		1.30588	1.31435		0.111176
9183	TAG53:1-FA16:0	Triacylglycerol	TAG Ester	54602	GC-FID	100010750		1.6202	1.7007		1.66045		1.4248	2.15198		0.109502
7945	CE(22:4)	Cholesterol Ester	CE Ester	54124	GC-FID	100010272		1.1935	0.9964		1.09495		1.05591	0.357046		0.109336
6795	PC(16:0/20:3)	Phosphatidylcholine	PC Ester	53296	GC-FID	100009444		0.9998	1.0002		1		0.95946	0.376572		0.107655
6800	PC(16:0/22:4)	Phosphatidylcholine	PC Ester	54161	GC-FID	100010309		1.2148	0.9177		1.06625		1.02024	0.427979		0.107505
8759	TAG49:1-FA18:1	Triacylglycerol	TAG Ester	53365	GC-FID	100009513		1.8447	1.5742		1.70945		1.49905	2.01641		0.104345
9337	TAG54:3-FA18:0	Triacylglycerol	TAG Ester	54604	GC-FID	100010752		1.6978	1.5612		1.6295		1.44137	1.81995		0.103372
9029	TAG52:0-FA16:0	Triacylglycerol	TAG Ester	53714	GC-FID	100009862		1.95	1.8432		1.8966		1.59608	2.90881		0.103314
8976	TAG51:3-FA16:0	Triacylglycerol	TAG Ester	53711	GC-FID	100009859		1.1058	1.0586		1.0822		1.06096	0.210615		0.100829
8746	TAG49:0-FA17:0	Triacylglycerol	TAG Ester	54405	GC-FID	100010553		2.48	2.1135		2.29675		1.95472	3.44037		0.0994156
9046	TAG52:1-FA20:0	Triacylglycerol	TAG Ester	53893	GC-FID	100010041		1.1598	1.6176		1.3887		1.25561	1.35149		0.0984753
8828	TAG50:1-FA14:0	Triacylglycerol	TAG Ester	54048	GC-FID	100010196		1.7655	1.6299		1.6977		1.49517	2.12576		0.095275
8055	DAG(16:0/18:2)	Diacylglycerol	DAG Ester	53271	GC-FID	100009419		1.5502	1.632		1.5911		1.42729	1.72157		0.0951525
6848	PC(18:1/22:5)	Phosphatidylcholine	PC Ester	53663	GC-FID	100009811		1.041	1.0031		1.02205		1.00002	0.234085		0.094094
9295	TAG54:1-FA18:0	Triacylglycerol	TAG Ester	54069	GC-FID	100010217		2.0598	1.8422		1.951		1.684	2.86755		0.0931096
9339	TAG54:3-FA18:2	Triacylglycerol	TAG Ester	54433	GC-FID	100010581		1.6445	1.5229		1.5837		1.42629	1.70592		0.0922715
9185	TAG53:1-FA17:0	Triacylglycerol	TAG Ester	53725	GC-FID	100009873		1.5841	1.5782		1.58115		1.40042	1.96193		0.0921164
8822	TAG50:0-FA18:0	Triacylglycerol	TAG Ester	53878	GC-FID	100010026		2.4535	2.118		2.28575		1.94482	3.73682		0.0912353
8030	DAG(14:0/18:1)	Diacylglycerol	DAG Ester	53800	GC-FID	100009948		1.2418	1.4348		1.3383		1.24363	1.04886		0.0902584
7962	CER(26:1)	Sphingolipids	Ceramide	53798	GC-FID	100009946		1.0841	1.0093		1.0467		1.01571	0.343429		0.0902311
8428	TAG42:0-FA12:0	Triacylglycerol	TAG Ester	53533	GC-FID	100009681		3.0633	3.0028		3.03305		2.58688	4.94578		0.0902122
6738	Total TAG	Neutral Complex Lipids SUM	Triacylglycerols	54658	GC-FID	100010821		1.4912	1.3782		1.4347		1.31457	1.3615		0.088232
8950	TAG51:1-FA17:0	Triacylglycerol	TAG Ester	54412	GC-FID	100010560		1.8026	1.5875		1.69505		1.48966	2.33077		0.0881195
9083	TAG52:3-FA22:1	Triacylglycerol	TAG Ester	53719	GC-FID	100009867		1.5147	1.3582		1.43645		1.32189	1.34775		0.0849997
9398	TAG54:6-FA20:3	Triacylglycerol	TAG Ester	54074	GC-FID	100010222		1.5494	1.2379		1.39365		1.30136	1.08818		0.084811
8857	TAG50:3-FA14:0	Triacylglycerol	TAG Ester	53707	GC-FID	100009855		1.5234	1.317		1.4202		1.30996	1.31532		0.0838155
7996	LCER(18:1)	Sphingolipids	Lactosylceramide	53476	GC-FID	100009624		0.8534	1.155		1.0042		0.99302	0.136856		0.0816918
9213	TAG53:3-FA17:0	Triacylglycerol	TAG Ester	54067	GC-FID	100010215		1.537	1.3524		1.4447		1.33651	1.34863		0.080221
8032	DAG(14:0/18:3)	Diacylglycerol	DAG Ester	54324	GC-FID	100010472		1.0129	1.1674		1.09015		1.02271	0.899309		0.0749887
8961	TAG51:2-FA15:0	Triacylglycerol	TAG Ester	54243	GC-FID	100010391		1.4549	1.3373		1.3961		1.2976	1.32657		0.0742517
8838	TAG50:1-FA20:1	Triacylglycerol	TAG Ester	53548	GC-FID	100009696		1.563	1.7302		1.6466		1.49898	2.03662		0.0724847
7950	CER(14:0)	Sphingolipids	Ceramide	54496	GC-FID	100010644		1.0333	0.9967		1.015		1.00173	0.185525		0.0715161
9224	TAG53:4-FA16:0	Triacylglycerol	TAG Ester	53391	GC-FID	100009539		1.9622	1.5921		1.77715		1.6272	2.20918		0.0678757
9066	TAG52:2-FA20:2	Triacylglycerol	TAG Ester	54418	GC-FID	100010566		1.7261	1.3898		1.55795		1.43946	1.77182		0.0668748
9372	TAG54:5-FA18:1	Triacylglycerol	TAG Ester	53736	GC-FID	100009884		1.5045	1.3656		1.43505		1.33677	1.47553		0.0666054
9081	TAG52:3-FA20:2	Triacylglycerol	TAG Ester	54248	GC-FID	100010396		1.4491	1.3573		1.4032		1.32721	1.15255		0.0659338
8854	TAG50:2-FA20:2	Triacylglycerol	TAG Ester	54238	GC-FID	100010386		1.7805	1.627		1.70375		1.58045	1.87346		0.065815
7226	LPE(18:1)	Lysophosphatidylethanolamine	LPE Ester	53288	GC-FID	100009436		1.1506	1.0627		1.10665		1.07113	0.550627		0.0645119
9187	TAG53:1-FA18:1	Triacylglycerol	TAG Ester	54603	GC-FID	100010751		1.5156	1.3747		1.44515		1.32802	1.81692		0.0644663
9342	TAG54:3-FA20:1	Triacylglycerol	TAG Ester	54434	GC-FID	100010582		1.2812	1.3265		1.30385		1.23584	1.08032		0.0629497
6818	PC(18:0/18:0)	Phosphatidylcholine	PC Ester	53660	GC-FID	100009808		1.03	1.008		1.019		1.00511	0.22754		0.0610355
6973	LPC(20:0)	Lysophosphatidylcholine	LPC Ester	53480	GC-FID	100009628		0.9983	1.0124		1.00535		0.996496	0.145971		0.0606559
9043	TAG52:1-FA18:0	Triacylglycerol	TAG Ester	53715	GC-FID	100009863		1.7408	1.5938		1.6673		1.52304	2.39641		0.0602002
8066	DAG(16:1/18:1)	Diacylglycerol	DAG Ester	54130	GC-FID	100010278		1.2472	1.2625		1.25485		1.19847	0.941945		0.059857
8899	TAG50:5-FA20:4	Triacylglycerol	TAG Ester	54590	GC-FID	100010738		1.3978	1.4182		1.408		1.3232	1.43091		0.0592603
8820	TAG50:0-FA16:0	Triacylglycerol	TAG Ester	54235	GC-FID	100010383		2.2394	1.9215		2.08045		1.87844	3.44496		0.0586392
8656	TAG48:0-FA16:0	Triacylglycerol	TAG Ester	54581	GC-FID	100010729		2.4249	2.2403		2.3326		2.09788	4.05854		0.0578327
6859	PC(18:2/20:5)	Phosphatidylcholine	PC Ester	53665	GC-FID	100009813		0.838	0.9619		0.89995		0.878364	0.386694		0.0558219
8849	TAG50:2-FA18:1	Triacylglycerol	TAG Ester	53550	GC-FID	100009698		1.5216	1.2832		1.4024		1.31892	1.50346		0.0555254
8831	TAG50:1-FA16:0	Triacylglycerol	TAG Ester	53879	GC-FID	100010027		1.7699	1.5711		1.6705		1.54179	2.34986		0.0547725
8094	DAG(18:2/18:3)	Diacylglycerol	DAG Ester	53279	GC-FID	100009427		1.4804	1.39		1.4352		1.37224	1.25039		0.0503489
8399	TAG38:0-FA12:0	Triacylglycerol	TAG Ester	53532	GC-FID	100009680		3.0172	3.2924		3.1548		2.86584	5.87182		0.0492106
9058	TAG52:2-FA16:1	Triacylglycerol	TAG Ester	53560	GC-FID	100009708		1.5026	1.3682		1.4354		1.36651	1.4302		0.0481668
9116	TAG52:5-FA20:3	Triacylglycerol	TAG Ester	53902	GC-FID	100010050		1.5562	1.3406		1.4484		1.39742	1.11123		0.0458733
7531	PI(18:0/16:1)	Phosphatidylinositol	PI Ester	54569	GC-FID	100010717		1.1887	1.1993		1.194		1.15704	0.825543		0.0447705
8064	DAG(16:1/16:1)	Diacylglycerol	DAG Ester	53631	GC-FID	100009779		0.9671	1.3487		1.1579		1.13781	0.45519		0.0441398
7942	CE(22:0)	Cholesterol Ester	CE Ester	53625	GC-FID	100009773		0.9233	1.2358		1.07955		1.06426	0.364677		0.0419384
9373	TAG54:5-FA18:2	Triacylglycerol	TAG Ester	53910	GC-FID	100010058		1.424	1.2976		1.3608		1.30146	1.42335		0.0416904
7959	CER(24:0)	Sphingolipids	Ceramide	54322	GC-FID	100010470		1.197	1.0458		1.1214		1.10118	0.491398		0.0411479
9069	TAG52:3-FA14:0	Triacylglycerol	TAG Ester	54061	GC-FID	100010209		1.5327	1.235		1.38385		1.3338	1.22658		0.0408012
7231	LPE(20:1)	Lysophosphatidylethanolamine	LPE Ester	53647	GC-FID	100009795		1.0309	0.9732		1.00205		0.98706	0.369208		0.0406004
9197	TAG53:2-FA16:0	Triacylglycerol	TAG Ester	54253	GC-FID	100010401		1.5369	1.4474		1.49215		1.41662	2.0103		0.0375735
6855	PC(18:2/20:1)	Phosphatidylcholine	PC Ester	53305	GC-FID	100009453		1.1406	0.7848		0.9627		0.952732	0.268705		0.0370964
6758	PC(14:0/18:1)	Phosphatidylcholine	PC Ester	53996	GC-FID	100010144		0.9754	1.0672		1.0213		1.01116	0.273486		0.0370768
8016	SM(26:1)	Sphingolipids	Sphingomyelin	53348	GC-FID	100009496		1.1768	0.9603		1.06855		1.06119	0.209604		0.0351233
8966	TAG51:2-FA18:1	Triacylglycerol	TAG Ester	53555	GC-FID	100009703		1.3439	1.2001		1.272		1.22926	1.22986		0.0347551
9362	TAG54:4-FA22:1	Triacylglycerol	TAG Ester	54438	GC-FID	100010586		1.4209	1.4772		1.44905		1.3951	1.57498		0.0342544
8026	DAG(14:0/16:0)	Diacylglycerol	DAG Ester	54323	GC-FID	100010471		1.8383	1.3668		1.60255		1.53806	2.04289		0.031566
6789	PC(16:0/18:1)	Phosphatidylcholine	PC Ester	53656	GC-FID	100009804		1.0749	1.0141		1.0445		1.03534	0.296125		0.0309194
7893	FFA(12:0)	Free Fatty Acids	Saturated FFA	54508	GC-FID	100010656		0.9678	1.0426		1.0052		1.00046	0.15394		0.0308171
9355	TAG54:4-FA18:2	Triacylglycerol	TAG Ester	54262	GC-FID	100010410		1.4289	1.3034		1.36615		1.32322	1.46591		0.0292883
7936	CE(20:0)	Cholesterol Ester	CE Ester	54317	GC-FID	100010465		0.9365	1.1042		1.02035		1.00929	0.382876		0.0288814
10605	MAG(22:1)	MAG	Ester	62021	GC-FID	100020148		0.9685	0.6923		0.8304		0.824608	0.207452		0.0279197
9685	TAG56:6-FA18:3	Triacylglycerol	TAG Ester	53747	GC-FID	100009895		1.3644	1.2836		1.324		1.2901	1.23155		0.0275296
9298	TAG54:1-FA20:1	Triacylglycerol	TAG Ester	54431	GC-FID	100010579		1.3014	1.5334		1.4174		1.37036	1.71036		0.0275053
9064	TAG52:2-FA20:0	Triacylglycerol	TAG Ester	54060	GC-FID	100010208		1.2822	1.3341		1.30815		1.27156	1.38037		0.0265045
9354	TAG54:4-FA18:1	Triacylglycerol	TAG Ester	54435	GC-FID	100010583		1.4559	1.3356		1.39575		1.35993	1.419		0.0252445
6730	Total HCER	Sphingolipid SUM	Hexosylceramides	54668	GC-FID	100010831		0.96	1.0226		0.9913		0.985292	0.265579		0.0226223
9040	TAG52:1-FA16:0	Triacylglycerol	TAG Ester	54417	GC-FID	100010565		1.4875	1.4485		1.468		1.42381	2.09814		0.0210605
7915	FFA(18:4)	Free Fatty Acids	Polyunsaturated FFA (PUFA)	53636	GC-FID	100009784		1.0171	1.0762		1.04665		1.04402	0.129211		0.0203233
9417	TAG54:7-FA20:4	Triacylglycerol	TAG Ester	53574	GC-FID	100009722		1.6234	1.4155		1.51945		1.48516	1.70484		0.0201157
7939	CE(20:3)	Cholesterol Ester	CE Ester	54319	GC-FID	100010467		1.1411	1.0115		1.0763		1.06914	0.360227		0.0198874
9047	TAG52:1-FA20:1	Triacylglycerol	TAG Ester	53559	GC-FID	100009707		1.4662	1.6368		1.5515		1.5192	2.02243		0.0159709
9321	TAG54:2-FA18:0	Triacylglycerol	TAG Ester	54259	GC-FID	100010407		1.5503	1.5108		1.53055		1.50593	2.13325		0.0115402
7958	CER(22:1)	Sphingolipids	Ceramide	54127	GC-FID	100010275		1.2122	1.0014		1.1068		1.10247	0.391653		0.0110608
9033	TAG52:0-FA20:0	Triacylglycerol	TAG Ester	54059	GC-FID	100010207		1.3831	1.6694		1.52625		1.50114	2.34959		0.0106853
8842	TAG50:2-FA14:0	Triacylglycerol	TAG Ester	53549	GC-FID	100009697		1.5672	1.4105		1.48885		1.47172	1.63541		0.0104769
6849	PC(18:1/22:6)	Phosphatidylcholine	PC Ester	53496	GC-FID	100009644		1.1697	0.8941		1.0319		1.02974	0.304651		0.00710322
9296	TAG54:1-FA18:1	Triacylglycerol	TAG Ester	53568	GC-FID	100009716		1.6896	1.5651		1.62735		1.61151	2.55545		0.00619773
9215	TAG53:3-FA18:1	Triacylglycerol	TAG Ester	53389	GC-FID	100009537		1.1479	1.1068		1.12735		1.12392	0.601635		0.00570778
6735	Total CE	Neutral Complex Lipids SUM	Cholesteryl Esters	54657	GC-FID	100010820		1.1128	0.9696		1.0412		1.04005	0.260903		0.00441544
9504	TAG55:4-FA18:2	Triacylglycerol	TAG Ester	54078	GC-FID	100010226		1.6141	1.4503		1.5322		1.52325	2.38822		0.0037484
9065	TAG52:2-FA20:1	Triacylglycerol	TAG Ester	53718	GC-FID	100009866		1.3456	1.3141		1.32985		1.32598	1.28904		0.00300224
8078	DAG(18:0/18:1)	Diacylglycerol	DAG Ester	54504	GC-FID	100010652		1.2732	1.287		1.2801		1.282	1.5634		-0.00121786
9085	TAG52:4-FA14:0	Triacylglycerol	TAG Ester	54596	GC-FID	100010744		1.3953	1.3119		1.3536		1.3563	1.34321		-0.00201011
9262	TAG53:6-FA20:4	Triacylglycerol	TAG Ester	53567	GC-FID	100009715		1.5472	1.4238		1.4855		1.48868	1.56836		-0.00203014
9432	TAG54:8-FA20:4	Triacylglycerol	TAG Ester	53741	GC-FID	100009889		1.6158	1.2741		1.44495		1.45018	1.84011		-0.00284004
9491	TAG55:3-FA18:2	Triacylglycerol	TAG Ester	53575	GC-FID	100009723		1.6254	1.466		1.5457		1.5586	2.50731		-0.00514336
9688	TAG56:6-FA20:2	Triacylglycerol	TAG Ester	54082	GC-FID	100010230		1.1866	1.2207		1.20365		1.20952	0.954418		-0.00615034
7899	FFA(18:0)	Free Fatty Acids	Saturated FFA	53805	GC-FID	100009953		0.9223	1.0374		0.97985		0.980556	0.108027		-0.00653541
7549	PI(18:1/18:1)	Phosphatidylinositol	PI Ester	53346	GC-FID	100009494		0.9866	1.0883		1.03745		1.0414	0.533734		-0.00740819
9553	TAG55:7-FA20:4	Triacylglycerol	TAG Ester	53917	GC-FID	100010065		1.0034	1.0202		1.0118		1.01226	0.0609327		-0.00754932
7212	PE(P-18:1/22:4)	Phosphatidylethanolamine	PE Plasmalogen	54567	GC-FID	100010715		1.0546	0.8962		0.9754		0.97768	0.265062		-0.00860175
9054	TAG52:2-FA14:0	Triacylglycerol	TAG Ester	53716	GC-FID	100009864		1.4006	1.499		1.4498		1.46473	1.594		-0.00936514
9134	TAG52:6-FA20:4	Triacylglycerol	TAG Ester	54065	GC-FID	100010213		1.5969	1.4432		1.52005		1.53744	1.80247		-0.00964785
9044	TAG52:1-FA18:1	Triacylglycerol	TAG Ester	53558	GC-FID	100009706		1.3551	1.3612		1.35815		1.38221	1.88233		-0.012781
9519	TAG55:5-FA18:2	Triacylglycerol	TAG Ester	53913	GC-FID	100010061		1.6446	1.4836		1.5641		1.60164	2.70875		-0.0138588
7990	HCER(24:1)	Sphingolipids	Hexosylceramide	54512	GC-FID	100010660		0.9951	1.0049		1		1.0044	0.276221		-0.0159438
7165	PE(P-16:0/18:2)	Phosphatidylethanolamine	PE Plasmalogen	54561	GC-FID	100010709		1.1981	0.9844		1.09125		1.10004	0.503246		-0.0174745
8835	TAG50:1-FA18:1	Triacylglycerol	TAG Ester	53880	GC-FID	100010028		1.6153	1.4745		1.5449		1.59624	2.54153		-0.0201989
8548	TAG46:1-FA14:1	Triacylglycerol	TAG Ester	54227	GC-FID	100010375		0.9827	1.1092		1.04595		1.05569	0.476414		-0.0204486
7149	PE(O-18:0/20:3)	Phosphatidylethanolamine	PE Ether	53335	GC-FID	100009483		0.9212	0.7878		0.8545		0.858032	0.155993		-0.022642
8996	TAG51:4-FA20:4	Triacylglycerol	TAG Ester	53713	GC-FID	100009861		1.382	1.0883		1.23515		1.27438	1.65763		-0.0236687
8050	DAG(16:0/16:0)	Diacylglycerol	DAG Ester	53977	GC-FID	100010125		1.7403	1.4342		1.58725		1.6537	2.70303		-0.024585
7926	CE(14:1)	Cholesterol Ester	CE Ester	53453	GC-FID	100009601		0.9404	0.9951		0.96775		0.984016	0.653204		-0.0249019
8434	TAG42:1-FA12:0	Triacylglycerol	TAG Ester	54030	GC-FID	100010178		2.4623	1.9497		2.206		2.34264	5.47183		-0.0249708
9503	TAG55:4-FA18:1	Triacylglycerol	TAG Ester	54611	GC-FID	100010759		1.4017	1.399		1.40035		1.46354	2.19251		-0.0288208
10592	MAG(17:0)	MAG	Ester	62008	GC-FID	100020135		1.1718	0.6701		0.92095		0.92852	0.234299		-0.0323092
9101	TAG52:4-FA22:4	Triacylglycerol	TAG Ester	53384	GC-FID	100009532		1.7824	1.3979		1.59015		1.66699	2.30198		-0.0333808
9351	TAG54:4-FA16:1	Triacylglycerol	TAG Ester	53570	GC-FID	100009718		1.0949	1.0609		1.0779		1.1047	0.750449		-0.0357066
9969	TAG58:6-FA16:0	Triacylglycerol	TAG Ester	53589	GC-FID	100009737		1.2389	1.1717		1.2053		1.24462	1.08827		-0.0361308
9539	TAG55:6-FA20:3	Triacylglycerol	TAG Ester	54445	GC-FID	100010593		0.9861	1.0408		1.01345		1.01552	0.0558075		-0.0370918
7944	CE(22:2)	Cholesterol Ester	CE Ester	53269	GC-FID	100009417		1.0446	0.9635		1.00405		1.01494	0.292691		-0.0371928
8021	DAG(12:0/18:2)	Diacylglycerol	DAG Ester	53455	GC-FID	100009603		1.199	0.9792		1.0891		1.12661	0.985443		-0.0380621
8084	DAG(18:1/18:2)	Diacylglycerol	DAG Ester	53276	GC-FID	100009424		1.2551	1.1014		1.17825		1.22609	1.24056		-0.0385648
6726	Total LPE	Phospholipid SUM	Lysophosphatidylethanolamines	54665	GC-FID	100010828		1.0306	0.9694		1		1.01105	0.286401		-0.0385892
7911	FFA(24:1)	Free Fatty Acids	Monounsaturated FFA	54140	GC-FID	100010288		0.8965	1.1109		1.0037		1.009	0.132469		-0.0400395
7044	PE(16:0/22:4)	Phosphatidylethanolamine	PE Ester	54358	GC-FID	100010506		0.9325	0.9706		0.95155		0.970108	0.460794		-0.0402739
7545	PI(18:0/22:5)	Phosphatidylinositol	PI Ester	54384	GC-FID	100010532		0.9354	1.1578		1.0466		1.06323	0.412162		-0.0403531
9103	TAG52:5-FA14:0	Triacylglycerol	TAG Ester	53901	GC-FID	100010049		1.4823	1.2494		1.36585		1.42756	1.52127		-0.0405621
9490	TAG55:3-FA18:1	Triacylglycerol	TAG Ester	54077	GC-FID	100010225		1.4435	1.3276		1.38555		1.47892	2.28674		-0.0408328
8885	TAG50:4-FA20:4	Triacylglycerol	TAG Ester	54054	GC-FID	100010202		1.3663	1.4204		1.39335		1.48214	2.15401		-0.0412227
9378	TAG54:5-FA20:3	Triacylglycerol	TAG Ester	53737	GC-FID	100009885		1.3733	1.1261		1.2497		1.29818	1.15792		-0.0418647
8407	TAG40:0-FA12:0	Triacylglycerol	TAG Ester	53688	GC-FID	100009836		1.6295	1.8068		1.71815		1.90925	4.3048		-0.0443928
8054	DAG(16:0/18:1)	Diacylglycerol	DAG Ester	53630	GC-FID	100009778		1.3788	1.3115		1.34515		1.43512	1.95173		-0.0460997
8870	TAG50:3-FA20:3	Triacylglycerol	TAG Ester	54588	GC-FID	100010736		1.3805	1.2332		1.30685		1.39574	1.91185		-0.0464962
9234	TAG53:4-FA20:4	Triacylglycerol	TAG Ester	53903	GC-FID	100010051		1.216	1.1964		1.2062		1.30362	1.88979		-0.0515528
9322	TAG54:2-FA18:1	Triacylglycerol	TAG Ester	54070	GC-FID	100010218		1.4223	1.379		1.40065		1.50514	2.02442		-0.0516128
9518	TAG55:5-FA18:1	Triacylglycerol	TAG Ester	53912	GC-FID	100010060		1.2669	1.152		1.20945		1.28974	1.50679		-0.0532881
9098	TAG52:4-FA20:3	Triacylglycerol	TAG Ester	53900	GC-FID	100010048		1.4331	1.254		1.34355		1.41756	1.34383		-0.0550708
6964	LPC(15:0)	Lysophosphatidylcholine	LPC Ester	53286	GC-FID	100009434		0.9383	1.0129		0.9756		0.988788	0.233774		-0.0564135
7929	CE(16:1)	Cholesterol Ester	CE Ester	54316	GC-FID	100010464		1.0744	0.9307		1.00255		1.03258	0.517594		-0.0580108
9619	TAG56:2-FA18:0	Triacylglycerol	TAG Ester	54272	GC-FID	100010420		1.5415	1.434		1.48775		1.64008	2.61548		-0.0582417
9668	TAG56:5-FA20:1	Triacylglycerol	TAG Ester	54447	GC-FID	100010595		1.3062	1.2854		1.2958		1.40656	1.83994		-0.0601998
9593	TAG56:10-FA18:2	Triacylglycerol	TAG Ester	54079	GC-FID	100010227		1.49	1.2147		1.35235		1.4844	2.1865		-0.0603914
9199	TAG53:2-FA17:0	Triacylglycerol	TAG Ester	54254	GC-FID	100010402		1.2556	1.2036		1.2296		1.3219	1.50516		-0.0613249
9629	TAG56:3-FA16:0	Triacylglycerol	TAG Ester	54612	GC-FID	100010760		1.3678	1.398		1.3829		1.5413	2.55998		-0.061874
9368	TAG54:5-FA16:0	Triacylglycerol	TAG Ester	54439	GC-FID	100010587		1.3488	1.211		1.2799		1.37562	1.53737		-0.0622622
8714	TAG48:4-FA20:4	Triacylglycerol	TAG Ester	53874	GC-FID	100010022		1.3626	1.2587		1.31065		1.43856	2.01267		-0.0635525
9297	TAG54:1-FA20:0	Triacylglycerol	TAG Ester	54430	GC-FID	100010578		1.1422	1.4579		1.30005		1.41491	1.78016		-0.0645211
9057	TAG52:2-FA16:0	Triacylglycerol	TAG Ester	53717	GC-FID	100009865		1.2091	1.1417		1.1754		1.25662	1.25822		-0.0645482
7910	FFA(22:1)	Free Fatty Acids	Monounsaturated FFA	53472	GC-FID	100009620		0.837	1.0951		0.96605		0.975584	0.147683		-0.0645571
9399	TAG54:6-FA20:4	Triacylglycerol	TAG Ester	53911	GC-FID	100010059		1.4516	1.3213		1.38645		1.49256	1.62428		-0.0653299
9369	TAG54:5-FA16:1	Triacylglycerol	TAG Ester	53735	GC-FID	100009883		1.2369	1.1159		1.1764		1.23899	0.949048		-0.0659524
9292	TAG54:1-FA16:0	Triacylglycerol	TAG Ester	54429	GC-FID	100010577		1.2784	1.2581		1.26825		1.4207	2.26503		-0.067306
9648	TAG56:4-FA18:2	Triacylglycerol	TAG Ester	53745	GC-FID	100009893		1.3327	1.2425		1.2876		1.42219	1.9468		-0.0691349
6736	Total DAG	Neutral Complex Lipids SUM	Diacylglycerols	54659	GC-FID	100010822		1.2603	1.1784		1.21935		1.317	1.40465		-0.0695219
9117	TAG52:5-FA20:4	Triacylglycerol	TAG Ester	53721	GC-FID	100009869		1.5248	1.2544		1.3896		1.51612	1.79617		-0.070441
9617	TAG56:2-FA16:0	Triacylglycerol	TAG Ester	53402	GC-FID	100009550		1.6147	1.5505		1.5826		1.84552	3.71273		-0.0708158
9388	TAG54:6-FA16:0	Triacylglycerol	TAG Ester	53572	GC-FID	100009720		1.3286	1.2251		1.27685		1.39606	1.67101		-0.0713401
7935	CE(18:4)	Cholesterol Ester	CE Ester	53623	GC-FID	100009771		1.2014	0.9035		1.05245		1.0931	0.568365		-0.0715279
9327	TAG54:2-FA20:2	Triacylglycerol	TAG Ester	53394	GC-FID	100009542		1.2531	1.1222		1.18765		1.28518	1.35711		-0.0718631
8398	TAG36:0-FA12:0	Triacylglycerol	TAG Ester	54388	GC-FID	100010536		1.9687	2.1567		2.0627		2.59124	7.29988		-0.0724045
9548	TAG55:7-FA18:1	Triacylglycerol	TAG Ester	53916	GC-FID	100010064		1.0391	1.0635		1.0513		1.07869	0.378141		-0.0724386
9082	TAG52:3-FA20:3	Triacylglycerol	TAG Ester	54595	GC-FID	100010743		1.3494	1.241		1.2952		1.44899	2.10869		-0.0729324
9073	TAG52:3-FA16:1	Triacylglycerol	TAG Ester	53896	GC-FID	100010044		1.3312	1.1777		1.25445		1.33384	1.05923		-0.0749472
9334	TAG54:3-FA16:0	Triacylglycerol	TAG Ester	53569	GC-FID	100009717		1.2618	1.1139		1.18785		1.28721	1.31721		-0.0754307
9338	TAG54:3-FA18:1	Triacylglycerol	TAG Ester	53906	GC-FID	100010054		1.5049	1.4055		1.4552		1.59194	1.71856		-0.0795668
7086	PE(18:0/22:5)	Phosphatidylethanolamine	PE Ester	53319	GC-FID	100009467		1.0799	1.02		1.04995		1.11409	0.801866		-0.0799859
9552	TAG55:7-FA20:3	Triacylglycerol	TAG Ester	53576	GC-FID	100009724		1.0399	0.9979		1.0189		1.02577	0.0855196		-0.0803559
7225	LPE(18:0)	Lysophosphatidylethanolamine	LPE Ester	53484	GC-FID	100009632		1.0595	1.0015		1.0305		1.0538	0.28406		-0.082039
9259	TAG53:6-FA18:2	Triacylglycerol	TAG Ester	54428	GC-FID	100010576		0.9999	1.0471		1.0235		1.03852	0.174219		-0.0862364
9633	TAG56:3-FA18:2	Triacylglycerol	TAG Ester	53404	GC-FID	100009552		1.2148	1.1719		1.19335		1.39525	2.33535		-0.0864548
7045	PE(16:0/22:5)	Phosphatidylethanolamine	PE Ester	54359	GC-FID	100010507		0.9758	1.0471		1.01145		1.06835	0.654745		-0.0869072
9631	TAG56:3-FA18:0	Triacylglycerol	TAG Ester	54613	GC-FID	100010761		1.336	1.1671		1.25155		1.39392	1.60884		-0.0884922
9637	TAG56:3-FA20:2	Triacylglycerol	TAG Ester	53579	GC-FID	100009727		1.1257	1.297		1.21135		1.33392	1.37623		-0.0890593
6728	Total CER	Sphingolipid SUM	Ceramides	54667	GC-FID	100010830		1.1762	1.0789		1.12755		1.17424	0.52232		-0.0893973
6764	PC(14:0/20:3)	Phosphatidylcholine	PC Ester	53823	GC-FID	100009971		1.0793	0.7858		0.93255		0.965688	0.370567		-0.0894252
6794	PC(16:0/20:2)	Phosphatidylcholine	PC Ester	54528	GC-FID	100010676		1.0154	0.9805		0.99795		1.02718	0.321149		-0.0910293
9350	TAG54:4-FA16:0	Triacylglycerol	TAG Ester	53734	GC-FID	100009882		1.2756	1.1024		1.189		1.31081	1.29771		-0.0938638
9635	TAG56:3-FA20:0	Triacylglycerol	TAG Ester	53405	GC-FID	100009553		1.1013	1.3391		1.2202		1.41605	2.06713		-0.0947458
9201	TAG53:2-FA18:1	Triacylglycerol	TAG Ester	54425	GC-FID	100010573		1.2932	1.0887		1.19095		1.33882	1.5414		-0.0959295
9477	TAG55:2-FA18:1	Triacylglycerol	TAG Ester	54268	GC-FID	100010416		1.2341	1.2762		1.25515		1.45144	2.04128		-0.0961623
9651	TAG56:4-FA20:1	Triacylglycerol	TAG Ester	54274	GC-FID	100010422		1.1907	1.2234		1.20705		1.37823	1.74314		-0.0982034
9061	TAG52:2-FA18:1	Triacylglycerol	TAG Ester	53894	GC-FID	100010042		1.1343	1.1172		1.12575		1.23748	1.11785		-0.0999474
9099	TAG52:4-FA20:4	Triacylglycerol	TAG Ester	53563	GC-FID	100009711		1.4551	1.293		1.37405		1.6608	2.84979		-0.100623
7495	PI(16:0/16:0)	Phosphatidylinositol	PI Ester	54568	GC-FID	100010716		1.0046	0.9954		1		1.08016	0.776168		-0.103282
7992	HCER(26:1)	Sphingolipids	Hexosylceramide	53988	GC-FID	100010136		1.0889	0.7		0.89445		0.923996	0.283908		-0.104069
7955	CER(20:0)	Sphingolipids	Ceramide	54321	GC-FID	100010469		1.1286	1.0718		1.1002		1.15288	0.50564		-0.104177
9712	TAG56:7-FA22:4	Triacylglycerol	TAG Ester	54084	GC-FID	100010232		1.2864	1.1863		1.23635		1.37639	1.32743		-0.105499
7534	PI(18:0/18:1)	Phosphatidylinositol	PI Ester	53684	GC-FID	100009832		1.0156	0.9505		0.98305		1.02258	0.367444		-0.10757
7136	PE(O-16:0/22:4)	Phosphatidylethanolamine	PE Ether	53852	GC-FID	100010000		0.634	0.9803		0.80715		0.834764	0.256373		-0.10771
8007	SM(18:0)	Sphingolipids	Sphingomyelin	54386	GC-FID	100010534		1.0291	0.9676		0.99835		1.02782	0.272605		-0.108105
8441	TAG42:2-FA12:0	Triacylglycerol	TAG Ester	53692	GC-FID	100009840		1.7245	1.6107		1.6676		2.3734	6.31269		-0.111806
7040	PE(16:0/20:4)	Phosphatidylethanolamine	PE Ester	54544	GC-FID	100010692		0.9969	1.015		1.00595		1.0729	0.59806		-0.111952
6970	LPC(18:2)	Lysophosphatidylcholine	LPC Ester	54331	GC-FID	100010479		0.9914	1.0186		1.005		1.05244	0.415606		-0.114137
6729	Total DCER	Sphingolipid SUM	Dihydroceramides	54670	GC-FID	100010833		1.0876	0.9681		1.02785		1.06549	0.326129		-0.11542
9643	TAG56:4-FA16:0	Triacylglycerol	TAG Ester	54614	GC-FID	100010762		1.1728	1.1885		1.18065		1.37165	1.64377		-0.116197
9669	TAG56:5-FA20:2	Triacylglycerol	TAG Ester	53407	GC-FID	100009555		1.1321	0.9868		1.05945		1.15897	0.850436		-0.117025
9704	TAG56:7-FA18:3	Triacylglycerol	TAG Ester	53585	GC-FID	100009733		1.2723	1.123		1.19765		1.36261	1.39602		-0.118163
6836	PC(18:1/18:1)	Phosphatidylcholine	PC Ester	53832	GC-FID	100009980		0.9576	0.9838		0.9707		1.01407	0.363971		-0.119163
9623	TAG56:2-FA20:1	Triacylglycerol	TAG Ester	53403	GC-FID	100009551		1.2592	1.3979		1.32855		1.5918	2.17169		-0.121221
7913	FFA(18:2)	Free Fatty Acids	Polyunsaturated FFA (PUFA)	53635	GC-FID	100009783		1.0338	1.0058		1.0198		1.09092	0.586698		-0.121221
8035	DAG(14:0/20:4)	Diacylglycerol	DAG Ester	53975	GC-FID	100010123		0.9574	1.2738		1.1156		1.31115	1.58384		-0.123467
9693	TAG56:6-FA22:4	Triacylglycerol	TAG Ester	53922	GC-FID	100010070		1.2256	1.1489		1.18725		1.36673	1.4251		-0.125944
7222	LPE(16:0)	Lysophosphatidylethanolamine	LPE Ester	54516	GC-FID	100010664		0.998	0.9915		0.99475		1.0358	0.322823		-0.127159
9389	TAG54:6-FA16:1	Triacylglycerol	TAG Ester	53738	GC-FID	100009886		1.2435	1.0793		1.1614		1.29657	1.02782		-0.131509
9326	TAG54:2-FA20:1	Triacylglycerol	TAG Ester	53393	GC-FID	100009541		1.1015	1.0595		1.0805		1.25686	1.32796		-0.132802
9281	TAG54:0-FA16:0	Triacylglycerol	TAG Ester	53732	GC-FID	100009880		1.2558	1.2377		1.24675		1.54523	2.24371		-0.133031
9930	TAG58:3-FA18:1	Triacylglycerol	TAG Ester	54282	GC-FID	100010430		1.9007	1.6061		1.7534		2.55781	6.02007		-0.133622
7171	PE(P-16:0/20:4)	Phosphatidylethanolamine	PE Plasmalogen	54020	GC-FID	100010168		1.0048	1.0195		1.01215		1.0703	0.431675		-0.134717
8044	DAG(15:0/18:1)	Diacylglycerol	DAG Ester	53457	GC-FID	100009605		1.2264	0.8953		1.06085		1.15993	0.734906		-0.134823
9344	TAG54:3-FA20:3	Triacylglycerol	TAG Ester	53395	GC-FID	100009543		1.1445	0.9985		1.0715		1.28694	1.57393		-0.136877
9244	TAG53:5-FA18:2	Triacylglycerol	TAG Ester	54257	GC-FID	100010405		0.9884	1.0407		1.01455		1.02886	0.103876		-0.137722
6774	PC(15:0/18:1)	Phosphatidylcholine	PC Ester	54526	GC-FID	100010674		1.1023	0.9006		1.00145		1.05568	0.389403		-0.139264
9122	TAG52:6-FA14:0	Triacylglycerol	TAG Ester	54421	GC-FID	100010569		1.2935	1.1859		1.2397		1.50522	1.87412		-0.141679
8045	DAG(15:0/18:2)	Diacylglycerol	DAG Ester	53976	GC-FID	100010124		1.2877	1.1995		1.2436		1.41214	1.17951		-0.14289
9318	TAG54:2-FA16:0	Triacylglycerol	TAG Ester	53733	GC-FID	100009881		1.1263	0.9984		1.06235		1.28386	1.54779		-0.143116
9363	TAG54:4-FA22:4	Triacylglycerol	TAG Ester	53571	GC-FID	100009719		1.3922	1.2678		1.33		1.73236	2.74764		-0.146439
9742	TAG56:9-FA20:4	Triacylglycerol	TAG Ester	54622	GC-FID	100010770		1.2115	1.0143		1.1129		1.4154	2.06242		-0.146672
7986	HCER(20:1)	Sphingolipids	Hexosylceramide	54510	GC-FID	100010658		0.6321	1.217		0.92455		0.971328	0.315077		-0.148465
9248	TAG53:5-FA20:4	Triacylglycerol	TAG Ester	53731	GC-FID	100009879		1.2522	1.1356		1.1939		1.4471	1.68281		-0.15046
7946	CE(22:5)	Cholesterol Ester	CE Ester	53797	GC-FID	100009945		1.0753	0.9965		1.0359		1.09344	0.381139		-0.150979
9665	TAG56:5-FA18:2	Triacylglycerol	TAG Ester	54275	GC-FID	100010423		1.1093	1.0384		1.07385		1.27458	1.3045		-0.153872
9652	TAG56:4-FA20:2	Triacylglycerol	TAG Ester	53580	GC-FID	100009728		1.1155	1.0934		1.10445		1.25959	0.996711		-0.155654
8071	DAG(16:1/20:4)	Diacylglycerol	DAG Ester	53272	GC-FID	100009420		1.3246	1.2741		1.29935		1.54912	1.5978		-0.156321
9343	TAG54:3-FA20:2	Triacylglycerol	TAG Ester	54261	GC-FID	100010409		1.1246	0.9936		1.0591		1.22278	1.03109		-0.158745
7969	DCER(16:0)	Sphingolipids	Dihydroceramide	54134	GC-FID	100010282		1.0963	0.7671		0.9317		0.987568	0.348012		-0.160534
9620	TAG56:2-FA18:1	Triacylglycerol	TAG Ester	53577	GC-FID	100009725		1.1943	1.1298		1.16205		1.41907	1.57704		-0.162978
9335	TAG54:3-FA16:1	Triacylglycerol	TAG Ester	54260	GC-FID	100010408		1.0844	1.0467		1.06555		1.24034	1.05607		-0.16551
9361	TAG54:4-FA20:4	Triacylglycerol	TAG Ester	54437	GC-FID	100010585		1.125	1.0475		1.08625		1.46554	2.2527		-0.168371
9578	TAG56:1-FA16:0	Triacylglycerol	TAG Ester	53401	GC-FID	100009549		1.6634	1.3718		1.5176		2.33399	4.80518		-0.169898
9632	TAG56:3-FA18:1	Triacylglycerol	TAG Ester	54446	GC-FID	100010594		1.3139	1.2078		1.26085		1.60884	2.03392		-0.171091
9622	TAG56:2-FA20:0	Triacylglycerol	TAG Ester	54273	GC-FID	100010421		1.2521	1.4479		1.35		1.78424	2.52913		-0.171694
7164	PE(P-16:0/18:1)	Phosphatidylethanolamine	PE Plasmalogen	53336	GC-FID	100009484		0.8513	1.0576		0.95445		1.01322	0.339399		-0.173171
9382	TAG54:5-FA22:4	Triacylglycerol	TAG Ester	54071	GC-FID	100010219		1.1611	1.1304		1.14575		1.41288	1.52371		-0.175318
9636	TAG56:3-FA20:1	Triacylglycerol	TAG Ester	53578	GC-FID	100009726		1.2453	1.2912		1.26825		1.62459	2.01688		-0.176678
9582	TAG56:1-FA18:1	Triacylglycerol	TAG Ester	54080	GC-FID	100010228		1.1158	1.2191		1.16745		1.66486	2.81328		-0.176808
9563	TAG55:8-FA20:4	Triacylglycerol	TAG Ester	53743	GC-FID	100009891		1.0122	0.9949		1.00355		1.0268	0.130916		-0.177595
7995	LCER(18:0)	Sphingolipids	Lactosylceramide	53475	GC-FID	100009623		0.9577	0.9657		0.9617		0.998796	0.20876		-0.177697
7906	FFA(14:1)	Free Fatty Acids	Monounsaturated FFA	53985	GC-FID	100010133		1.0018	1.031		1.0164		1.08936	0.404033		-0.180589
9173	TAG53:0-FA16:0	Triacylglycerol	TAG Ester	54601	GC-FID	100010749		1.2375	1.1408		1.18915		1.55972	2.03306		-0.182274
7202	PE(P-18:1/18:2)	Phosphatidylethanolamine	PE Plasmalogen	54211	GC-FID	100010359		1.244	0.92		1.082		1.17723	0.514219		-0.185197
7952	CER(18:0)	Sphingolipids	Ceramide	54320	GC-FID	100010468		0.9461	1.1919		1.069		1.19537	0.680357		-0.185744
7928	CE(16:0)	Cholesterol Ester	CE Ester	54315	GC-FID	100010463		1.0627	0.9154		0.98905		1.0443	0.295846		-0.186766
9723	TAG56:8-FA18:3	Triacylglycerol	TAG Ester	53924	GC-FID	100010072		1.1882	0.992		1.0901		1.39404	1.5967		-0.190356
7138	PE(O-16:0/22:6)	Phosphatidylethanolamine	PE Ether	53332	GC-FID	100009480		1.1134	0.7314		0.9224		0.978476	0.291126		-0.192618
6765	PC(14:0/20:4)	Phosphatidylcholine	PC Ester	54338	GC-FID	100010486		1.0126	1.008		1.0103		1.09547	0.43422		-0.196149
9727	TAG56:8-FA20:4	Triacylglycerol	TAG Ester	54451	GC-FID	100010599		1.1903	1.0956		1.14295		1.64258	2.53678		-0.196954
7968	DCER(14:0)	Sphingolipids	Dihydroceramide	53803	GC-FID	100009951		0.9778	0.9778		0.9778		0.979576	0.00888		-0.2
7030	PE(16:0/16:1)	Phosphatidylethanolamine	PE Ester	53672	GC-FID	100009820		0.9225	0.9225		0.9225		0.9287	0.031		-0.2
6742	PC(12:0/18:1)	Phosphatidylcholine	PC Ester	54335	GC-FID	100010483		0.7669	0.7669		0.7669		0.785548	0.09324		-0.2
7078	PE(18:0/20:1)	Phosphatidylethanolamine	PE Ester	54363	GC-FID	100010511		0.6396	0.6396		0.6396		0.668432	0.14416		-0.2
7230	LPE(20:0)	Lysophosphatidylethanolamine	LPE Ester	53289	GC-FID	100009437		0.6783	0.6783		0.6783		0.691168	0.06434		-0.2
7509	PI(16:0/22:4)	Phosphatidylinositol	PI Ester	54383	GC-FID	100010531		0.9721	0.9721		0.9721		0.974332	0.01116		-0.2
7511	PI(16:0/22:6)	Phosphatidylinositol	PI Ester	54217	GC-FID	100010365		0.9888	0.9888		0.9888		0.989696	0.00448		-0.2
8083	DAG(18:1/18:1)	Diacylglycerol	DAG Ester	53275	GC-FID	100009423		0.9882	1.0518		1.02		1.2566	1.17028		-0.202173
7240	LPE(22:5)	Lysophosphatidylethanolamine	LPE Ester	54519	GC-FID	100010667		1.03	1.0478		1.0389		1.13068	0.447265		-0.205212
9647	TAG56:4-FA18:1	Triacylglycerol	TAG Ester	53744	GC-FID	100009892		1.0482	1.0068		1.0275		1.3079	1.35282		-0.207273
7957	CER(22:0)	Sphingolipids	Ceramide	53627	GC-FID	100009775		1.0702	1.0004		1.0353		1.16829	0.634955		-0.209451
9379	TAG54:5-FA20:4	Triacylglycerol	TAG Ester	54264	GC-FID	100010412		1.1019	0.9959		1.0489		1.42798	1.78172		-0.212762
9656	TAG56:4-FA22:4	Triacylglycerol	TAG Ester	53918	GC-FID	100010066		1.0417	0.9583		1		1.38742	1.78767		-0.216718
7039	PE(16:0/20:3)	Phosphatidylethanolamine	PE Ester	54543	GC-FID	100010691		1.0965	0.6759		0.8862		0.988544	0.463957		-0.220589
7931	CE(18:0)	Cholesterol Ester	CE Ester	54123	GC-FID	100010271		1.0155	0.8784		0.94695		1.02056	0.327716		-0.224628
8474	TAG44:0-FA18:0	Triacylglycerol	TAG Ester	53534	GC-FID	100009682		0.7923	1.0777		0.935		0.982164	0.209657		-0.224958
9360	TAG54:4-FA20:3	Triacylglycerol	TAG Ester	53909	GC-FID	100010057		1.0586	0.9679		1.01325		1.3261	1.38118		-0.226509
9708	TAG56:7-FA20:3	Triacylglycerol	TAG Ester	53410	GC-FID	100009558		1.0603	0.9921		1.0262		1.34275	1.39746		-0.226519
7184	PE(P-18:0/18:2)	Phosphatidylethanolamine	PE Plasmalogen	54377	GC-FID	100010525		0.9928	0.9268		0.9598		1.06988	0.480652		-0.229031
9919	TAG58:2-FA18:1	Triacylglycerol	TAG Ester	53753	GC-FID	100009901		1.2677	1.3331		1.3004		2.73337	6.12952		-0.233782
8015	SM(26:0)	Sphingolipids	Sphingomyelin	54387	GC-FID	100010535		0.9626	0.9215		0.94205		1.00134	0.253352		-0.234007
8061	DAG(16:0/20:5)	Diacylglycerol	DAG Ester	54502	GC-FID	100010650		0.8725	0.8097		0.8411		1.65658	3.48268		-0.234152
9118	TAG52:5-FA20:5	Triacylglycerol	TAG Ester	53722	GC-FID	100009870		1.0687	0.9774		1.02305		1.9128	3.78112		-0.235314
7987	HCER(22:0)	Sphingolipids	Hexosylceramide	53473	GC-FID	100009621		0.985	1.0135		0.99925		1.0774	0.328143		-0.238171
6833	PC(18:0/22:6)	Phosphatidylcholine	PC Ester	54170	GC-FID	100010318		1.0171	1.0622		1.03965		1.14578	0.4452		-0.238387
7985	HCER(20:0)	Sphingolipids	Hexosylceramide	53639	GC-FID	100009787		0.9511	0.9408		0.94595		1.02362	0.31993		-0.24276
9709	TAG56:7-FA20:4	Triacylglycerol	TAG Ester	53750	GC-FID	100009898		1.0209	0.9916		1.00625		1.47414	1.90611		-0.245466
9955	TAG58:5-FA18:1	Triacylglycerol	TAG Ester	53588	GC-FID	100009736		1.0092	0.9073		0.95825		1.36028	1.63041		-0.246585
7239	LPE(22:4)	Lysophosphatidylethanolamine	LPE Ester	53487	GC-FID	100009635		0.8769	1.0539		0.9654		1.12586	0.647666		-0.247745
9228	TAG53:4-FA18:1	Triacylglycerol	TAG Ester	53392	GC-FID	100009540		0.9828	1.0127		0.99775		1.0257	0.112611		-0.248234
8060	DAG(16:0/20:4)	Diacylglycerol	DAG Ester	53458	GC-FID	100009606		0.8634	0.9423		0.90285		1.65062	3.00882		-0.248527
7195	PE(P-18:0/22:5)	Phosphatidylethanolamine	PE Plasmalogen	53681	GC-FID	100009829		1.0925	0.8755		0.984		1.11635	0.530374		-0.249545
7081	PE(18:0/20:4)	Phosphatidylethanolamine	PE Ester	54013	GC-FID	100010161		0.9976	0.957		0.9773		1.13757	0.64051		-0.250225
9684	TAG56:6-FA18:2	Triacylglycerol	TAG Ester	54081	GC-FID	100010229		1.027	1.0043		1.01565		1.33248	1.25466		-0.25252
7980	DCER(26:1)	Sphingolipids	Dihydroceramide	53281	GC-FID	100009429		0.8597	0.8597		0.8597		0.894792	0.138607		-0.253176
8900	TAG50:5-FA20:5	Triacylglycerol	TAG Ester	54241	GC-FID	100010389		1.0207	1.0286		1.02465		1.47314	1.76143		-0.254617
9739	TAG56:9-FA18:3	Triacylglycerol	TAG Ester	54621	GC-FID	100010769		1.1413	0.9697		1.0555		1.53729	1.88035		-0.256225
9689	TAG56:6-FA20:3	Triacylglycerol	TAG Ester	53408	GC-FID	100009556		1.043	0.9354		0.9892		1.29893	1.20262		-0.257545
7151	PE(O-18:0/20:5)	Phosphatidylethanolamine	PE Ether	54204	GC-FID	100010352		0.8924	0.8924		0.8924		0.909072	0.064625		-0.25798
9660	TAG56:5-FA16:0	Triacylglycerol	TAG Ester	54616	GC-FID	100010764		1.0414	0.9327		0.98705		1.45665	1.8199		-0.258037
9540	TAG55:6-FA20:4	Triacylglycerol	TAG Ester	54269	GC-FID	100010417		1.0237	1.0838		1.05375		1.3159	1.0144		-0.258424
7098	PE(18:1/20:5)	Phosphatidylethanolamine	PE Ester	53675	GC-FID	100009823		0.8349	0.8349		0.8349		0.85954	0.0947344		-0.260096
10587	MAG(14:0)	MAG	Ester	62028	GC-FID	100020155		0.7108	1.1508		0.9308		0.98462	0.206902		-0.260123
9433	TAG54:8-FA20:5	Triacylglycerol	TAG Ester	54444	GC-FID	100010592		1.2896	1.13		1.2098		1.81762	2.31072		-0.263044
7921	FFA(22:4)	Free Fatty Acids	Polyunsaturated FFA (PUFA)	53637	GC-FID	100009785		1.0043	0.9855		0.9949		1.03451	0.150143		-0.263828
9135	TAG52:6-FA20:5	Triacylglycerol	TAG Ester	53723	GC-FID	100009871		1.1789	0.9241		1.0515		1.66734	2.33243		-0.264036
9383	TAG54:5-FA22:5	Triacylglycerol	TAG Ester	54606	GC-FID	100010754		1.0978	0.9805		1.03915		1.65934	2.33486		-0.26562
6840	PC(18:1/20:1)	Phosphatidylcholine	PC Ester	53493	GC-FID	100009641		0.9108	0.9108		0.9108		0.932452	0.0808212		-0.2679
9380	TAG54:5-FA20:5	Triacylglycerol	TAG Ester	54265	GC-FID	100010413		0.9188	0.9548		0.9368		1.8278	3.29856		-0.270119
6810	PC(17:0/20:5)	Phosphatidylcholine	PC Ester	53298	GC-FID	100009446		0.7827	0.7827		0.7827		0.809092	0.0976624		-0.270237
7983	HCER(18:0)	Sphingolipids	Hexosylceramide	53638	GC-FID	100009786		0.9158	0.9914		0.9536		1.03917	0.315024		-0.271624
8096	DAG(18:2/20:4)	Diacylglycerol	DAG Ester	53462	GC-FID	100009610		1.0405	1.063		1.05175		1.68765	2.33319		-0.272547
7233	LPE(20:3)	Lysophosphatidylethanolamine	LPE Ester	54334	GC-FID	100010482		1.0119	0.8623		0.9371		1.05136	0.417687		-0.273564
9646	TAG56:4-FA18:0	Triacylglycerol	TAG Ester	53406	GC-FID	100009554		0.9677	0.9529		0.9603		1.31446	1.29284		-0.273939
9703	TAG56:7-FA18:2	Triacylglycerol	TAG Ester	53409	GC-FID	100009557		0.9992	0.9644		0.9818		1.37966	1.45044		-0.274306
10597	MAG(18:4)	MAG	Ester	62013	GC-FID	100020140		0.7394	0.7394		0.7394		0.768972	0.107083		-0.276159
7106	PE(18:2/16:1)	Phosphatidylethanolamine	PE Ester	53510	GC-FID	100009658		1.0513	0.7083		0.8798		0.994868	0.413672		-0.278162
7907	FFA(16:1)	Free Fatty Acids	Monounsaturated FFA	54136	GC-FID	100010284		1.1947	1.1927		1.1937		1.60799	1.48414		-0.279144
9987	TAG58:7-FA16:0	Triacylglycerol	TAG Ester	53591	GC-FID	100009739		0.987	1.013		1		1.28788	1.02966		-0.279582
7925	CE(14:0)	Cholesterol Ester	CE Ester	53452	GC-FID	100009600		1.0087	0.8887		0.9487		1.08791	0.497695		-0.279705
6770	PC(14:0/22:5)	Phosphatidylcholine	PC Ester	53998	GC-FID	100010146		0.8448	0.8448		0.8448		0.884956	0.143432		-0.279966
10601	MAG(20:3)	MAG	Ester	62017	GC-FID	100020144		0.899	0.899		0.899		0.908472	0.033166		-0.285593
6757	PC(14:0/16:1)	Phosphatidylcholine	PC Ester	54151	GC-FID	100010299		0.5509	0.5509		0.5509		0.591952	0.142571		-0.287941
7977	DCER(24:0)	Sphingolipids	Dihydroceramide	54328	GC-FID	100010476		1.0109	0.9348		0.97285		1.10166	0.442527		-0.291087
9409	TAG54:7-FA16:1	Triacylglycerol	TAG Ester	54266	GC-FID	100010414		1.0924	0.9629		1.02765		1.36199	1.13353		-0.294953
9227	TAG53:4-FA18:0	Triacylglycerol	TAG Ester	53565	GC-FID	100009713		0.96	1.0263		0.99315		1.01558	0.0745626		-0.300768
7993	LCER(14:0)	Sphingolipids	Lactosylceramide	53284	GC-FID	100009432		0.8624	0.9741		0.91825		1.05658	0.459238		-0.301216
7161	PE(P-16:0/16:0)	Phosphatidylethanolamine	PE Plasmalogen	54373	GC-FID	100010521		0.9196	0.9196		0.9196		0.956832	0.123268		-0.302041
7901	FFA(20:0)	Free Fatty Acids	Saturated FFA	53470	GC-FID	100009618		0.9209	1.0535		0.9872		1.02644	0.128557		-0.305204
7137	PE(O-16:0/22:5)	Phosphatidylethanolamine	PE Ether	53331	GC-FID	100009479		0.7972	1.0563		0.92675		1.03778	0.360209		-0.308238
9884	TAG58:10-FA20:4	Triacylglycerol	TAG Ester	53414	GC-FID	100009562		0.8431	0.7368		0.78995		2.07155	4.13997		-0.309567
6725	Total PE	Phospholipid SUM	Phosphatidylethanolamines	54662	GC-FID	100010825		0.9531	0.8864		0.91975		1.0289	0.352353		-0.309786
9463	TAG55:1-FA18:1	Triacylglycerol	TAG Ester	54610	GC-FID	100010758		0.9907	0.8625		0.9266		1.60863	2.17879		-0.313032
9674	TAG56:5-FA22:4	Triacylglycerol	TAG Ester	54276	GC-FID	100010424		0.9684	0.9092		0.9388		1.45495	1.64246		-0.314253
9478	TAG55:2-FA18:2	Triacylglycerol	TAG Ester	53742	GC-FID	100009890		1.0243	0.9928		1.00855		1.7899	2.48411		-0.314539
9418	TAG54:7-FA20:5	Triacylglycerol	TAG Ester	53399	GC-FID	100009547		1.1096	1.0292		1.0694		1.927	2.72615		-0.314583
10610	MAG(24:0)	MAG	Ester	62026	GC-FID	100020153		0.7368	0.7368		0.7368		0.786488	0.154838		-0.320904
7897	FFA(16:0)	Free Fatty Acids	Saturated FFA	53986	GC-FID	100010134		0.9083	1.0328		0.97055		1.00987	0.121529		-0.32356
10608	MAG(22:5)	MAG	Ester	62024	GC-FID	100020151		0.7884	0.7884		0.7884		0.82624	0.116874		-0.323766
7917	FFA(20:3)	Free Fatty Acids	Polyunsaturated FFA (PUFA)	54138	GC-FID	100010286		0.9894	1.0081		0.99875		1.08228	0.257314		-0.324623
8059	DAG(16:0/20:3)	Diacylglycerol	DAG Ester	54501	GC-FID	100010649		0.886	0.8436		0.8648		1.39713	1.63153		-0.326277
7974	DCER(22:0)	Sphingolipids	Dihydroceramide	53465	GC-FID	100009613		0.9903	0.9356		0.96295		1.11746	0.473194		-0.326534
9525	TAG55:5-FA20:4	Triacylglycerol	TAG Ester	53914	GC-FID	100010062		1.0227	0.9618		0.99225		1.54361	1.68837		-0.326565
9664	TAG56:5-FA18:1	Triacylglycerol	TAG Ester	53920	GC-FID	100010068		0.962	0.8744		0.9182		1.38965	1.43206		-0.329209
9743	TAG56:9-FA20:5	Triacylglycerol	TAG Ester	53925	GC-FID	100010073		0.9567	0.9313		0.944		2.29939	4.09574		-0.330926
7919	FFA(20:5)	Free Fatty Acids	Polyunsaturated FFA (PUFA)	54329	GC-FID	100010477		0.9795	0.9787		0.9791		1.01398	0.105386		-0.331012
6782	PC(15:0/22:6)	Phosphatidylcholine	PC Ester	53654	GC-FID	100009802		0.7968	0.7968		0.7968		0.82814	0.093739		-0.334333
10586	MAG(12:0)	MAG	Ester	62002	GC-FID	100020128		0.92	0.6473		0.78365		0.857032	0.219241		-0.334709
9150	TAG52:7-FA20:5	Triacylglycerol	TAG Ester	54066	GC-FID	100010214		1.1454	0.9535		1.04945		1.81043	2.24189		-0.339436
6734	Total FFA	Neutral Complex Lipids SUM	Free Fatty Acids	54660	GC-FID	100010823		0.9483	1.0478		0.99805		1.05292	0.161147		-0.340496
7978	DCER(24:1)	Sphingolipids	Dihydroceramide	53466	GC-FID	100009614		0.9253	1.1178		1.02155		1.14038	0.34729		-0.342175
10032	TAG58:9-FA20:4	Triacylglycerol	TAG Ester	53927	GC-FID	100010075		0.8104	0.7534		0.7819		1.71196	2.70598		-0.343707
8097	DAG(18:2/20:5)	Diacylglycerol	DAG Ester	54505	GC-FID	100010653		0.859	0.8252		0.8421		2.34603	4.34449		-0.346169
8090	DAG(18:1/22:4)	Diacylglycerol	DAG Ester	53278	GC-FID	100009426		0.8411	1.1446		0.99285		1.43962	1.28726		-0.347074
7970	DCER(18:0)	Sphingolipids	Dihydroceramide	53464	GC-FID	100009612		0.8097	0.8097		0.8097		0.929144	0.343349		-0.34788
9683	TAG56:6-FA18:1	Triacylglycerol	TAG Ester	54277	GC-FID	100010425		0.9764	0.8877		0.93205		1.50638	1.63661		-0.35093
6873	PC(20:0/20:3)	Phosphatidylcholine	PC Ester	54175	GC-FID	100010323		0.6343	0.6343		0.6343		0.686192	0.147567		-0.351649
9679	TAG56:6-FA16:0	Triacylglycerol	TAG Ester	54617	GC-FID	100010765		0.9728	0.9146		0.9437		1.48706	1.53946		-0.352953
9721	TAG56:8-FA18:1	Triacylglycerol	TAG Ester	54280	GC-FID	100010428		0.9066	0.87		0.8883		1.66142	2.16948		-0.356362
8085	DAG(18:1/20:1)	Diacylglycerol	DAG Ester	53801	GC-FID	100009949		0.9665	0.8667		0.9166		1.31785	1.1248		-0.35673
7998	LCER(20:1)	Sphingolipids	Lactosylceramide	53812	GC-FID	100009960		0.8492	1.0428		0.946		1.06636	0.336249		-0.357961
7143	PE(O-18:0/18:1)	Phosphatidylethanolamine	PE Ether	53513	GC-FID	100009661		1.0432	0.7355		0.88935		1.01278	0.3442		-0.3586
10604	MAG(22:0)	MAG	Ester	62020	GC-FID	100020147		0.8559	0.8559		0.8559		0.884364	0.0790327		-0.360155
9400	TAG54:6-FA20:5	Triacylglycerol	TAG Ester	54607	GC-FID	100010755		0.9452	0.9114		0.9283		1.95354	2.84213		-0.360728
9690	TAG56:6-FA20:4	Triacylglycerol	TAG Ester	54618	GC-FID	100010766		0.8471	0.8119		0.8295		1.4679	1.76377		-0.361949
9701	TAG56:7-FA18:0	Triacylglycerol	TAG Ester	53749	GC-FID	100009897		0.9968	0.8555		0.92615		1.61698	1.90712		-0.362236
7235	LPE(20:5)	Lysophosphatidylethanolamine	LPE Ester	53994	GC-FID	100010142		0.7279	0.7279		0.7279		0.833204	0.289149		-0.364186
7954	CER(18:1)	Sphingolipids	Ceramide	53626	GC-FID	100009774		0.7143	0.4592		0.58675		0.741644	0.425217		-0.364271
9670	TAG56:5-FA20:3	Triacylglycerol	TAG Ester	54448	GC-FID	100010596		0.9341	0.8308		0.88245		1.35301	1.28838		-0.365231
9653	TAG56:4-FA20:3	Triacylglycerol	TAG Ester	53746	GC-FID	100009894		0.8648	0.8449		0.85485		1.38182	1.43091		-0.368276
9728	TAG56:8-FA20:5	Triacylglycerol	TAG Ester	53751	GC-FID	100009899		0.9102	0.8756		0.8929		2.1007	3.27451		-0.368848
9654	TAG56:4-FA20:4	Triacylglycerol	TAG Ester	54615	GC-FID	100010763		0.8	0.9043		0.85215		1.5563	1.90673		-0.369299
9675	TAG56:5-FA22:5	Triacylglycerol	TAG Ester	53581	GC-FID	100009729		0.8442	0.8311		0.83765		1.47541	1.72591		-0.369522
6771	PC(14:0/22:6)	Phosphatidylcholine	PC Ester	53999	GC-FID	100010147		0.8833	0.8833		0.8833		0.939696	0.152129		-0.370711
8088	DAG(18:1/20:4)	Diacylglycerol	DAG Ester	53460	GC-FID	100009608		0.853	0.777		0.815		1.64093	2.2255		-0.37112
6975	LPC(20:2)	Lysophosphatidylcholine	LPC Ester	53990	GC-FID	100010138		0.9943	0.89		0.94215		1.01726	0.202338		-0.371192
9138	TAG52:6-FA22:6	Triacylglycerol	TAG Ester	54252	GC-FID	100010400		1.0891	0.9387		1.0139		2.03319	2.73134		-0.373184
9991	TAG58:7-FA18:2	Triacylglycerol	TAG Ester	53926	GC-FID	100010074		1.009	0.8343		0.92165		1.37762	1.19877		-0.380363
9722	TAG56:8-FA18:2	Triacylglycerol	TAG Ester	53411	GC-FID	100009559		1.0385	0.9044		0.97145		1.8594	2.33332		-0.380554
10000	TAG58:7-FA22:4	Triacylglycerol	TAG Ester	54623	GC-FID	100010771		0.9324	0.8051		0.86875		1.3386	1.23438		-0.380638
8089	DAG(18:1/20:5)	Diacylglycerol	DAG Ester	53277	GC-FID	100009425		0.6139	0.5977		0.6058		1.74789	2.99856		-0.38088
7170	PE(P-16:0/20:3)	Phosphatidylethanolamine	PE Plasmalogen	53855	GC-FID	100010003		0.8961	0.8682		0.88215		1.0452	0.424665		-0.38394
7898	FFA(17:0)	Free Fatty Acids	Saturated FFA	53468	GC-FID	100009616		0.9223	0.972		0.94715		1.10598	0.412831		-0.384734
9710	TAG56:7-FA20:5	Triacylglycerol	TAG Ester	54279	GC-FID	100010427		0.8125	0.7875		0.8		2.00395	3.11068		-0.387038
8017	DAG(12:0/16:0)	Diacylglycerol	DAG Ester	53629	GC-FID	100009777		0.9046	0.897		0.9008		1.09324	0.49166		-0.391417
7102	PE(18:1/22:4)	Phosphatidylethanolamine	PE Ester	53323	GC-FID	100009471		0.7607	0.7607		0.7607		0.817748	0.145543		-0.391966
10589	MAG(15:0)	MAG	Ester	62005	GC-FID	100020132		0.9337	0.8906		0.91215		1.0221	0.280481		-0.391991
9971	TAG58:6-FA18:0	Triacylglycerol	TAG Ester	54455	GC-FID	100010603		1.0025	0.8489		0.9257		1.5945	1.70443		-0.392391
9272	TAG53:7-FA18:3	Triacylglycerol	TAG Ester	54258	GC-FID	100010406		0.9389	0.9938		0.96635		1.00033	0.0863492		-0.393542
6827	PC(18:0/20:4)	Phosphatidylcholine	PC Ester	54167	GC-FID	100010315		0.9768	0.9649		0.97085		1.11542	0.367264		-0.39363
9691	TAG56:6-FA20:5	Triacylglycerol	TAG Ester	54278	GC-FID	100010426		0.7662	0.662		0.7141		1.77448	2.68334		-0.395171
8095	DAG(18:2/20:3)	Diacylglycerol	DAG Ester	54132	GC-FID	100010280		1.0258	0.766		0.8959		1.45151	1.40426		-0.395663
8002	LCER(24:1)	Sphingolipids	Lactosylceramide	53478	GC-FID	100009626		0.9306	0.7912		0.8609		0.992208	0.331237		-0.396417
9982	TAG58:6-FA22:4	Triacylglycerol	TAG Ester	53415	GC-FID	100009563		0.9248	0.818		0.8714		1.36827	1.24776		-0.398209
10609	MAG(22:6)	MAG	Ester	62025	GC-FID	100020152		0.8681	0.8681		0.8681		0.887504	0.0487226		-0.398254
6824	PC(18:0/20:1)	Phosphatidylcholine	PC Ester	53299	GC-FID	100009447		0.8809	0.8809		0.8809		0.930276	0.123826		-0.398752
7960	CER(24:1)	Sphingolipids	Ceramide	53628	GC-FID	100009776		1.0142	0.9061		0.96015		1.16968	0.523868		-0.399967
8037	DAG(14:1/16:0)	Diacylglycerol	DAG Ester	53456	GC-FID	100009604		0.9311	1.0736		1.00235		1.26242	0.643861		-0.403916
7082	PE(18:0/20:5)	Phosphatidylethanolamine	PE Ester	54192	GC-FID	100010340		0.7536	0.9872		0.8704		1.02382	0.375505		-0.40858
7232	LPE(20:2)	Lysophosphatidylethanolamine	LPE Ester	53818	GC-FID	100009966		0.829	1.1036		0.9663		1.10074	0.326414		-0.411858
9972	TAG58:6-FA18:1	Triacylglycerol	TAG Ester	53754	GC-FID	100009902		0.8775	0.7865		0.832		1.36564	1.28677		-0.414713
9403	TAG54:6-FA22:5	Triacylglycerol	TAG Ester	53397	GC-FID	100009545		0.9321	0.8614		0.89675		1.49206	1.42532		-0.417668
10611	MAG(24:1)	MAG	Ester	62027	GC-FID	100020154		0.7614	0.7614		0.7614		0.821744	0.142932		-0.422186
9260	TAG53:6-FA18:3	Triacylglycerol	TAG Ester	53566	GC-FID	100009714		1.0135	0.9787		0.9961		1.02419	0.066242		-0.424082
6731	Total LCER	Sphingolipid SUM	Lactosylceramides	54669	GC-FID	100010832		0.8919	0.9296		0.91075		1.03621	0.29468		-0.425756
9885	TAG58:10-FA20:5	Triacylglycerol	TAG Ester	54087	GC-FID	100010235		0.4941	0.498		0.49605		1.83561	3.14525		-0.425899
8086	DAG(18:1/20:2)	Diacylglycerol	DAG Ester	54327	GC-FID	100010475		0.851	0.7768		0.8139		1.32916	1.20814		-0.426485
9702	TAG56:7-FA18:1	Triacylglycerol	TAG Ester	53584	GC-FID	100009732		0.8198	0.7916		0.8057		1.57728	1.80771		-0.426825
9404	TAG54:6-FA22:6	Triacylglycerol	TAG Ester	54608	GC-FID	100010756		0.9034	0.8255		0.86445		2.41172	3.62231		-0.42715
9663	TAG56:5-FA18:0	Triacylglycerol	TAG Ester	53919	GC-FID	100010067		0.808	0.7742		0.7911		1.50422	1.64674		-0.433053
7920	FFA(22:2)	Free Fatty Acids	Polyunsaturated FFA (PUFA)	53283	GC-FID	100009431		0.9385	0.9899		0.9642		1.02034	0.128741		-0.4361
9420	TAG54:7-FA22:5	Triacylglycerol	TAG Ester	54443	GC-FID	100010591		0.9861	0.8353		0.9107		1.57924	1.5175		-0.440551
7544	PI(18:0/22:4)	Phosphatidylinositol	PI Ester	53685	GC-FID	100009833		0.74	0.74		0.74		0.83982	0.226354		-0.440992
7908	FFA(18:1)	Free Fatty Acids	Monounsaturated FFA	53469	GC-FID	100009617		0.9985	0.987		0.99275		1.27464	0.637546		-0.442155
10602	MAG(20:4)	MAG	Ester	62018	GC-FID	100020145		0.6318	0.6318		0.6318		0.710636	0.177582		-0.443941
9545	TAG55:7-FA15:0	Triacylglycerol	TAG Ester	54270	GC-FID	100010418		0.8802	0.9931		0.93665		1.58755	1.45113		-0.448548
9713	TAG56:7-FA22:5	Triacylglycerol	TAG Ester	54450	GC-FID	100010598		0.9714	0.8789		0.92515		1.61683	1.54054		-0.448983
9694	TAG56:6-FA22:5	Triacylglycerol	TAG Ester	54083	GC-FID	100010231		0.7431	0.7007		0.7219		1.44889	1.61659		-0.449706
10595	MAG(18:2)	MAG	Ester	62011	GC-FID	100020138		1.0091	0.8697		0.9394		1.35268	0.91782		-0.45028
7916	FFA(20:2)	Free Fatty Acids	Polyunsaturated FFA (PUFA)	54137	GC-FID	100010285		0.9629	0.9982		0.98055		1.13647	0.344671		-0.452368
8062	DAG(16:0/22:5)	Diacylglycerol	DAG Ester	54326	GC-FID	100010474		0.8527	0.6551		0.7539		1.52735	1.70741		-0.452994
7103	PE(18:1/22:5)	Phosphatidylethanolamine	PE Ester	53324	GC-FID	100009472		0.9213	0.9596		0.94045		1.0806	0.308282		-0.454603
7073	PE(18:0/18:0)	Phosphatidylethanolamine	PE Ester	54547	GC-FID	100010695		0.9335	0.951		0.94225		1.1083	0.36502		-0.454906
7097	PE(18:1/20:4)	Phosphatidylethanolamine	PE Ester	54364	GC-FID	100010512		0.908	0.9793		0.94365		1.13265	0.414676		-0.455773
9784	TAG57:3-FA18:2	Triacylglycerol	TAG Ester	53586	GC-FID	100009734		0.774	0.72		0.747		2.02945	2.8131		-0.455885
9730	TAG56:8-FA22:5	Triacylglycerol	TAG Ester	54620	GC-FID	100010768		0.9284	0.9038		0.9161		1.5541	1.39387		-0.45772
8087	DAG(18:1/20:3)	Diacylglycerol	DAG Ester	53633	GC-FID	100009781		0.875	0.6774		0.7762		1.48997	1.54615		-0.461645
10598	MAG(20:0)	MAG	Ester	62014	GC-FID	100020141		0.7345	0.8586		0.79655		0.907728	0.240133		-0.462985
7213	PE(P-18:1/22:5)	Phosphatidylethanolamine	PE Plasmalogen	53343	GC-FID	100009491		0.9514	0.8722		0.9118		1.13172	0.465521		-0.472416
6814	PC(18:0/12:0)	Phosphatidylcholine	PC Ester	53828	GC-FID	100009976		0.6686	0.8307		0.74965		0.866496	0.247228		-0.472624
8063	DAG(16:0/22:6)	Diacylglycerol	DAG Ester	53980	GC-FID	100010128		0.6633	0.7418		0.70255		1.89054	2.49141		-0.476833
10014	TAG58:8-FA20:3	Triacylglycerol	TAG Ester	54088	GC-FID	100010236		0.7163	0.7037		0.71		1.47864	1.60731		-0.478217
7905	FFA(24:0)	Free Fatty Acids	Saturated FFA	53807	GC-FID	100009955		0.8305	0.942		0.88625		1.04762	0.334803		-0.481997
7895	FFA(14:0)	Free Fatty Acids	Saturated FFA	53467	GC-FID	100009615		0.9115	0.9853		0.9484		1.04146	0.193059		-0.482049
10603	MAG(20:5)	MAG	Ester	62019	GC-FID	100020146		0.6723	0.9426		0.80745		0.93068	0.253089		-0.486904
6777	PC(15:0/20:3)	Phosphatidylcholine	PC Ester	54339	GC-FID	100010487		0.7865	0.7865		0.7865		0.8812	0.19445		-0.487016
9695	TAG56:6-FA22:6	Triacylglycerol	TAG Ester	53582	GC-FID	100009730		0.6255	0.6344		0.62995		1.99632	2.7895		-0.489828
9682	TAG56:6-FA18:0	Triacylglycerol	TAG Ester	53921	GC-FID	100010069		0.8055	0.7916		0.79855		1.58337	1.59853		-0.490963
9699	TAG56:7-FA16:0	Triacylglycerol	TAG Ester	53748	GC-FID	100009896		0.9001	0.7931		0.8466		1.76232	1.86186		-0.491827
7189	PE(P-18:0/20:3)	Phosphatidylethanolamine	PE Plasmalogen	54564	GC-FID	100010712		0.8859	0.8406		0.86325		1.07848	0.433376		-0.496635
7932	CE(18:1)	Cholesterol Ester	CE Ester	54494	GC-FID	100010642		0.9627	0.7975		0.8801		1.0177	0.276103		-0.49838
9880	TAG58:10-FA18:2	Triacylglycerol	TAG Ester	54281	GC-FID	100010429		0.7674	0.6565		0.71195		2.05721	2.69605		-0.498975
10590	MAG(16:0)	MAG	Ester	62006	GC-FID	100020133		1.0265	0.8628		0.94465		1.02128	0.150889		-0.50783
10015	TAG58:8-FA20:4	Triacylglycerol	TAG Ester	54458	GC-FID	100010606		0.7592	0.6769		0.71805		1.63386	1.77753		-0.515213
8069	DAG(16:1/20:0)	Diacylglycerol	DAG Ester	54503	GC-FID	100010651		0.6186	0.6186		0.6186		0.827152	0.402673		-0.517919
9989	TAG58:7-FA18:0	Triacylglycerol	TAG Ester	53416	GC-FID	100009564		0.7155	0.7721		0.7438		1.8102	2.04898		-0.520453
9979	TAG58:6-FA20:4	Triacylglycerol	TAG Ester	54283	GC-FID	100010431		0.6622	0.6677		0.66495		1.42208	1.45332		-0.520964
9671	TAG56:5-FA20:4	Triacylglycerol	TAG Ester	54449	GC-FID	100010597		0.6923	0.6037		0.648		1.49534	1.62435		-0.52165
6983	LPC(22:5)	Lysophosphatidylcholine	LPC Ester	54333	GC-FID	100010481		0.793	0.7398		0.7664		0.953744	0.358001		-0.523307
9153	TAG52:7-FA22:6	Triacylglycerol	TAG Ester	54600	GC-FID	100010748		1.0011	0.9247		0.9629		2.17447	2.28032		-0.531317
9990	TAG58:7-FA18:1	Triacylglycerol	TAG Ester	54284	GC-FID	100010432		0.7067	0.6452		0.67595		1.50925	1.56675		-0.531865
10599	MAG(20:1)	MAG	Ester	62015	GC-FID	100020142		0.7388	0.7388		0.7388		0.85776	0.223568		-0.532098
7918	FFA(20:4)	Free Fatty Acids	Polyunsaturated FFA (PUFA)	53471	GC-FID	100009619		0.9583	0.9201		0.9392		1.06994	0.245475		-0.532599
9774	TAG57:2-FA18:1	Triacylglycerol	TAG Ester	54086	GC-FID	100010234		0.619	0.539		0.579		1.72414	2.12306		-0.53938
9459	TAG55:1-FA16:0	Triacylglycerol	TAG Ester	54267	GC-FID	100010415		0.8026	0.7604		0.7815		2.08128	2.40352		-0.540779
7191	PE(P-18:0/20:5)	Phosphatidylethanolamine	PE Plasmalogen	54208	GC-FID	100010356		0.9039	0.9487		0.9263		1.25745	0.610298		-0.542607
6783	PC(16:0/12:0)	Phosphatidylcholine	PC Ester	54527	GC-FID	100010675		0.853	0.711		0.782		0.886728	0.19295		-0.542772
7903	FFA(22:0)	Free Fatty Acids	Saturated FFA	54139	GC-FID	100010287		0.8925	1.0003		0.9464		1.01324	0.123048		-0.543236
7154	PE(O-18:0/22:4)	Phosphatidylethanolamine	PE Ether	54019	GC-FID	100010167		0.7724	0.7724		0.7724		0.835424	0.115779		-0.544347
9983	TAG58:6-FA22:5	Triacylglycerol	TAG Ester	53590	GC-FID	100009738		0.7766	0.6413		0.70895		1.572	1.58402		-0.544846
10002	TAG58:7-FA22:6	Triacylglycerol	TAG Ester	53418	GC-FID	100009566		0.4666	0.441		0.4538		1.65964	2.19715		-0.548822
10009	TAG58:8-FA18:2	Triacylglycerol	TAG Ester	53755	GC-FID	100009903		0.7796	0.7376		0.7586		1.56237	1.4603		-0.550412
6978	LPC(20:5)	Lysophosphatidylcholine	LPC Ester	53644	GC-FID	100009792		0.6191	0.6191		0.6191		0.865256	0.446872		-0.550842
7994	LCER(16:0)	Sphingolipids	Lactosylceramide	54141	GC-FID	100010289		0.8414	0.8756		0.8585		1.03602	0.321935		-0.551428
9887	TAG58:10-FA22:5	Triacylglycerol	TAG Ester	53752	GC-FID	100009900		0.8067	0.7297		0.7682		1.53979	1.39907		-0.551504
7948	CE(24:0)	Cholesterol Ester	CE Ester	54125	GC-FID	100010273		0.8575	0.9336		0.89555		1.105	0.376538		-0.556242
10035	TAG58:9-FA22:5	Triacylglycerol	TAG Ester	53420	GC-FID	100009568		0.7705	0.7062		0.73835		1.55469	1.46597		-0.556862
6808	PC(17:0/20:3)	Phosphatidylcholine	PC Ester	54343	GC-FID	100010491		0.8817	0.8574		0.86955		1.03604	0.296454		-0.561605
10591	MAG(16:1)	MAG	Ester	62007	GC-FID	100020134		0.9432	0.9347		0.93895		1.10619	0.297713		-0.561757
9718	TAG56:8-FA16:0	Triacylglycerol	TAG Ester	53923	GC-FID	100010071		0.7653	0.6359		0.7006		2.00007	2.31112		-0.562267
10027	TAG58:9-FA18:2	Triacylglycerol	TAG Ester	54624	GC-FID	100010772		0.6252	0.5584		0.5918		1.6534	1.88414		-0.563442
7089	PE(18:1/16:1)	Phosphatidylethanolamine	PE Ester	54550	GC-FID	100010698		0.7511	0.7511		0.7511		0.86214	0.196945		-0.563813
9997	TAG58:7-FA20:4	Triacylglycerol	TAG Ester	54456	GC-FID	100010604		0.6869	0.7649		0.7259		1.54046	1.43846		-0.566272
7949	CE(24:1)	Cholesterol Ester	CE Ester	54126	GC-FID	100010274		0.7774	1.0195		0.89845		1.06552	0.293457		-0.569316
8099	DAG(18:2/22:5)	Diacylglycerol	DAG Ester	53463	GC-FID	100009611		0.7374	0.5797		0.65855		1.56047	1.58296		-0.569771
8004	LCER(26:1)	Sphingolipids	Lactosylceramide	53642	GC-FID	100009790		0.6573	0.6573		0.6573		0.81804	0.279791		-0.574499
9534	TAG55:6-FA18:1	Triacylglycerol	TAG Ester	53915	GC-FID	100010063		0.9163	0.9959		0.9561		1.03664	0.140124		-0.574748
10607	MAG(22:4)	MAG	Ester	62023	GC-FID	100020150		0.7181	0.7181		0.7181		1.03998	0.558103		-0.576747
6796	PC(16:0/20:4)	Phosphatidylcholine	PC Ester	54158	GC-FID	100010306		0.9047	0.8818		0.89325		1.14354	0.432759		-0.578359
8098	DAG(18:2/22:4)	Diacylglycerol	DAG Ester	54133	GC-FID	100010281		0.9988	0.7491		0.87395		1.24043	0.633354		-0.578631
6865	PC(20:0/14:1)	Phosphatidylcholine	PC Ester	54350	GC-FID	100010498		0.6924	0.6924		0.6924		0.815876	0.213019		-0.579647
8091	DAG(18:1/22:5)	Diacylglycerol	DAG Ester	53802	GC-FID	100009950		0.5325	0.657		0.59475		1.417	1.41805		-0.579842
10026	TAG58:9-FA18:1	Triacylglycerol	TAG Ester	54089	GC-FID	100010237		0.5457	0.4412		0.49345		1.67452	2.02995		-0.581823
7922	FFA(22:5)	Free Fatty Acids	Polyunsaturated FFA (PUFA)	54509	GC-FID	100010657		0.9233	0.9822		0.95275		1.03678	0.143789		-0.584399
7198	PE(P-18:1/16:0)	Phosphatidylethanolamine	PE Plasmalogen	54565	GC-FID	100010713		0.7911	0.9437		0.8674		1.05841	0.326176		-0.585597
7150	PE(O-18:0/20:4)	Phosphatidylethanolamine	PE Ether	54203	GC-FID	100010351		0.8613	0.7842		0.82275		1.03984	0.364369		-0.595808
6778	PC(15:0/20:4)	Phosphatidylcholine	PC Ester	53295	GC-FID	100009443		0.6965	0.9111		0.8038		0.983844	0.300657		-0.598835
10001	TAG58:7-FA22:5	Triacylglycerol	TAG Ester	53417	GC-FID	100009565		0.6577	0.5696		0.61365		1.4746	1.43554		-0.599735
6874	PC(20:0/20:4)	Phosphatidylcholine	PC Ester	53308	GC-FID	100009456		0.7865	0.9566		0.87155		1.06808	0.324855		-0.60499
9888	TAG58:10-FA22:6	Triacylglycerol	TAG Ester	53587	GC-FID	100009735		0.438	0.5208		0.4794		1.94276	2.39067		-0.612113
7208	PE(P-18:1/20:4)	Phosphatidylethanolamine	PE Plasmalogen	53859	GC-FID	100010007		0.875	0.885		0.88		1.15518	0.448601		-0.613409
10008	TAG58:8-FA18:1	Triacylglycerol	TAG Ester	54457	GC-FID	100010605		0.5415	0.468		0.50475		1.53912	1.67129		-0.618906
7207	PE(P-18:1/20:3)	Phosphatidylethanolamine	PE Plasmalogen	53682	GC-FID	100009830		0.7413	0.9575		0.8494		1.07721	0.365152		-0.623871
7927	CE(15:0)	Cholesterol Ester	CE Ester	53454	GC-FID	100009602		0.8642	0.7935		0.82885		1.13291	0.486247		-0.625325
9436	TAG54:8-FA22:6	Triacylglycerol	TAG Ester	54076	GC-FID	100010224		0.5702	0.4468		0.5085		1.68188	1.8684		-0.628016
9421	TAG54:7-FA22:6	Triacylglycerol	TAG Ester	54609	GC-FID	100010757		0.6341	0.6217		0.6279		1.80647	1.86497		-0.631949
7172	PE(P-16:0/20:5)	Phosphatidylethanolamine	PE Plasmalogen	54562	GC-FID	100010710		0.5051	0.8223		0.6637		1.01028	0.54674		-0.633903
7190	PE(P-18:0/20:4)	Phosphatidylethanolamine	PE Plasmalogen	53524	GC-FID	100009672		0.9331	0.8183		0.8757		1.15665	0.442022		-0.635597
9557	TAG55:7-FA22:6	Triacylglycerol	TAG Ester	54271	GC-FID	100010419		0.5705	0.4872		0.52885		1.55726	1.59722		-0.643879
8036	DAG(14:0/22:6)	Diacylglycerol	DAG Ester	54499	GC-FID	100010647		0.9045	0.3371		0.6208		1.21686	0.922786		-0.645939
10019	TAG58:8-FA22:5	Triacylglycerol	TAG Ester	53756	GC-FID	100009904		0.6204	0.5937		0.60705		1.4816	1.33529		-0.654952
7930	CE(17:0)	Cholesterol Ester	CE Ester	54122	GC-FID	100010270		0.9165	0.7483		0.8324		1.11448	0.430303		-0.655528
9746	TAG56:9-FA22:6	Triacylglycerol	TAG Ester	54452	GC-FID	100010600		0.7017	0.6482		0.67495		1.96461	1.95507		-0.659648
9731	TAG56:8-FA22:6	Triacylglycerol	TAG Ester	53412	GC-FID	100009560		0.5239	0.51		0.51695		1.85864	2.03145		-0.660463
7177	PE(P-16:0/22:6)	Phosphatidylethanolamine	PE Plasmalogen	53679	GC-FID	100009827		0.9855	0.6404		0.81295		1.11809	0.460673		-0.662374
10594	MAG(18:1)	MAG	Ester	62010	GC-FID	100020137		0.7377	0.7236		0.73065		1.50303	1.15784		-0.667086
6969	LPC(18:1)	Lysophosphatidylcholine	LPC Ester	54145	GC-FID	100010293		0.8315	0.7737		0.8026		1.02335	0.330259		-0.668409
6813	PC(17:0/22:6)	Phosphatidylcholine	PC Ester	53659	GC-FID	100009807		0.5222	0.5222		0.5222		0.750096	0.340369		-0.669557
9853	TAG57:8-FA22:6	Triacylglycerol	TAG Ester	54454	GC-FID	100010602		0.7687	0.7528		0.76075		1.34601	0.873953		-0.669672
10132	TAG60:10-FA22:5	Triacylglycerol	TAG Ester	53757	GC-FID	100009905		0.5016	0.5666		0.5341		1.6722	1.69114		-0.672977
10159	TAG60:12-FA22:6	Triacylglycerol	TAG Ester	54285	GC-FID	100010433		0.2908	0.2934		0.2921		2.57186	3.3855		-0.67339
10020	TAG58:8-FA22:6	Triacylglycerol	TAG Ester	53419	GC-FID	100009567		0.3751	0.3517		0.3634		1.55796	1.77135		-0.674379
9714	TAG56:7-FA22:6	Triacylglycerol	TAG Ester	54619	GC-FID	100010767		0.4114	0.3628		0.3871		1.54437	1.71469		-0.674918
10147	TAG60:11-FA22:6	Triacylglycerol	TAG Ester	53421	GC-FID	100009569		0.4053	0.391		0.39815		2.11694	2.54514		-0.675325
7087	PE(18:0/22:6)	Phosphatidylethanolamine	PE Ester	54193	GC-FID	100010341		0.6866	0.7818		0.7342		1.35788	0.921966		-0.676472
8082	DAG(18:0/22:6)	Diacylglycerol	DAG Ester	53274	GC-FID	100009422		0.7992	0.5082		0.6537		1.38263	1.06801		-0.682508
10036	TAG58:9-FA22:6	Triacylglycerol	TAG Ester	54459	GC-FID	100010607		0.4684	0.3995		0.43395		1.95151	2.21823		-0.68413
10600	MAG(20:2)	MAG	Ester	62016	GC-FID	100020143		0.6629	0.6629		0.6629		0.81248	0.217432		-0.687941
9700	TAG56:7-FA16:1	Triacylglycerol	TAG Ester	53583	GC-FID	100009731		0.6814	0.7526		0.717		1.33537	0.895369		-0.690634
7947	CE(22:6)	Cholesterol Ester	CE Ester	53970	GC-FID	100010118		0.8	0.7217		0.76085		1.1497	0.559298		-0.69524
8100	DAG(18:2/22:6)	Diacylglycerol	DAG Ester	54506	GC-FID	100010654		0.3854	0.4355		0.41045		1.92018	2.14046		-0.70533
10146	TAG60:11-FA22:5	Triacylglycerol	TAG Ester	54090	GC-FID	100010238		0.4786	0.4221		0.45035		1.89341	2.02625		-0.712184
7125	PE(O-16:0/18:1)	Phosphatidylethanolamine	PE Ether	54366	GC-FID	100010514		0.6998	0.6998		0.6998		0.82552	0.17574		-0.715374
6967	LPC(17:0)	Lysophosphatidylcholine	LPC Ester	54143	GC-FID	100010291		0.8283	0.8691		0.8487		1.00277	0.215072		-0.716373
8072	DAG(16:1/22:6)	Diacylglycerol	DAG Ester	53459	GC-FID	100009607		0.8199	0.3975		0.6087		1.29473	0.950511		-0.721751
8092	DAG(18:1/22:6)	Diacylglycerol	DAG Ester	53461	GC-FID	100009609		0.4348	0.3408		0.3878		1.67712	1.77696		-0.725578
9719	TAG56:8-FA16:1	Triacylglycerol	TAG Ester	54085	GC-FID	100010233		0.6658	0.6409		0.65335		1.43819	1.06765		-0.735114
6976	LPC(20:3)	Lysophosphatidylcholine	LPC Ester	54146	GC-FID	100010294		0.7881	0.7532		0.77065		1.06378	0.397432		-0.73756
7096	PE(18:1/20:3)	Phosphatidylethanolamine	PE Ester	54195	GC-FID	100010343		0.7373	0.7925		0.7649		0.9505	0.24861		-0.746552
9862	TAG57:9-FA22:6	Triacylglycerol	TAG Ester	53413	GC-FID	100009561		0.9168	1		0.9584		1.00096	0.0565552		-0.752539
10606	MAG(22:2)	MAG	Ester	62022	GC-FID	100020149		0.6142	0.6142		0.6142		0.797732	0.243081		-0.755024
6802	PC(16:0/22:6)	Phosphatidylcholine	PC Ester	54003	GC-FID	100010151		0.7105	0.8215		0.766		1.06615	0.395611		-0.758704
6828	PC(18:0/20:5)	Phosphatidylcholine	PC Ester	54168	GC-FID	100010316		0.7682	0.781		0.7746		1.2521	0.62248		-0.767093
6823	PC(18:0/20:0)	Phosphatidylcholine	PC Ester	54166	GC-FID	100010314		0.6479	0.8511		0.7495		0.951512	0.258783		-0.780624
7104	PE(18:1/22:6)	Phosphatidylethanolamine	PE Ester	53509	GC-FID	100009657		0.6603	0.6765		0.6684		1.08599	0.527649		-0.79142
9214	TAG53:3-FA18:0	Triacylglycerol	TAG Ester	53728	GC-FID	100009876		0.9658	0.9781		0.97195		1.02011	0.060715		-0.793181
6864	PC(18:2/22:6)	Phosphatidylcholine	PC Ester	54349	GC-FID	100010497		0.6431	0.6431		0.6431		0.823296	0.227121		-0.793391
7183	PE(P-18:0/18:1)	Phosphatidylethanolamine	PE Plasmalogen	53338	GC-FID	100009486		0.7104	0.739		0.7247		1.03941	0.392169		-0.802491
10133	TAG60:10-FA22:6	Triacylglycerol	TAG Ester	53758	GC-FID	100009906		0.3072	0.2549		0.28105		1.67104	1.67273		-0.830973
7896	FFA(15:0)	Free Fatty Acids	Saturated FFA	54135	GC-FID	100010283		0.8682	0.9085		0.88835		1.0312	0.171709		-0.831956
7546	PI(18:0/22:6)	Phosphatidylinositol	PI Ester	54219	GC-FID	100010367		0.5507	0.5507		0.5507		0.86624	0.378198		-0.834325
6797	PC(16:0/20:5)	Phosphatidylcholine	PC Ester	54159	GC-FID	100010307		0.6406	0.5672		0.6039		1.16061	0.667158		-0.834447
7941	CE(20:5)	Cholesterol Ester	CE Ester	53795	GC-FID	100009943		0.7001	0.6548		0.67745		1.20496	0.610735		-0.863736
6843	PC(18:1/20:4)	Phosphatidylcholine	PC Ester	54172	GC-FID	100010320		0.8721	0.8158		0.84395		1.11575	0.314104		-0.865326
7909	FFA(20:1)	Free Fatty Acids	Monounsaturated FFA	53987	GC-FID	100010135		0.8771	0.8778		0.87745		1.07183	0.224504		-0.86581
6844	PC(18:1/20:5)	Phosphatidylcholine	PC Ester	53494	GC-FID	100009642		0.5209	0.6368		0.57885		1.04145	0.528176		-0.875848
7940	CE(20:4)	Cholesterol Ester	CE Ester	54495	GC-FID	100010643		0.8757	0.7743		0.825		1.12362	0.33842		-0.882407
7132	PE(O-16:0/20:4)	Phosphatidylethanolamine	PE Ether	53329	GC-FID	100009477		0.6698	0.7566		0.7132		1.06788	0.401237		-0.883956
6805	PC(17:0/18:1)	Phosphatidylcholine	PC Ester	54162	GC-FID	100010310		0.8903	0.6723		0.7813		1.10782	0.366143		-0.891771
7046	PE(16:0/22:6)	Phosphatidylethanolamine	PE Ester	53845	GC-FID	100009993		0.6142	0.4649		0.53955		1.19989	0.72564		-0.910014
7214	PE(P-18:1/22:6)	Phosphatidylethanolamine	PE Plasmalogen	54022	GC-FID	100010170		0.9026	0.5375		0.72005		1.04072	0.352197		-0.910474
6984	LPC(22:6)	Lysophosphatidylcholine	LPC Ester	53645	GC-FID	100009793		0.8421	0.6825		0.7623		1.15835	0.431994		-0.91679
6867	PC(20:0/18:1)	Phosphatidylcholine	PC Ester	53306	GC-FID	100009454		0.8201	0.6964		0.75825		1.05548	0.320477		-0.92746
9243	TAG53:5-FA18:1	Triacylglycerol	TAG Ester	54427	GC-FID	100010575		0.9444	0.9823		0.96335		1.00828	0.0471827		-0.952172
7201	PE(P-18:1/18:1)	Phosphatidylethanolamine	PE Plasmalogen	54210	GC-FID	100010358		0.6832	0.6602		0.6717		1.0132	0.354989		-0.962013
7185	PE(P-18:0/18:3)	Phosphatidylethanolamine	PE Plasmalogen	53523	GC-FID	100009671		0.8108	0.8108		0.8108		0.8108	3.39935e-16		-0.979796
7196	PE(P-18:0/22:6)	Phosphatidylethanolamine	PE Plasmalogen	54209	GC-FID	100010357		0.6377	0.6468		0.64225		1.04583	0.410583		-0.982938
6739	Total MAG	Neutral Complex Lipids SUM	Monoacylglycerols	62056	GC-FID	100020183		0.873	0.8271		0.85005		1.09005	0.232317		-1.03308
6982	LPC(22:4)	Lysophosphatidylcholine	LPC Ester	53815	GC-FID	100009963		0.5045	0.5045		0.5045		0.828888	0.31388		-1.03348
9258	TAG53:6-FA18:1	Triacylglycerol	TAG Ester	53904	GC-FID	100010052		0.9988	0.9283		0.96355		1.00579	0.0407774		-1.03582
8003	LCER(26:0)	Sphingolipids	Lactosylceramide	53641	GC-FID	100009789		0.5664	0.5664		0.5664		0.883908	0.305691		-1.03866
7209	PE(P-18:1/20:5)	Phosphatidylethanolamine	PE Plasmalogen	54380	GC-FID	100010528		0.4661	0.4661		0.4661		0.913516	0.426251		-1.04965
7923	FFA(22:6)	Free Fatty Acids	Polyunsaturated FFA (PUFA)	53806	GC-FID	100009954		0.7978	0.8678		0.8328		1.04664	0.203689		-1.04984
7234	LPE(20:4)	Lysophosphatidylethanolamine	LPE Ester	53485	GC-FID	100009633		0.7555	0.6142		0.68485		1.03774	0.306546		-1.15117
6809	PC(17:0/20:4)	Phosphatidylcholine	PC Ester	53826	GC-FID	100009974		0.6179	0.5674		0.59265		1.06741	0.411843		-1.15276
7156	PE(O-18:0/22:6)	Phosphatidylethanolamine	PE Ether	54371	GC-FID	100010519		0.8047	0.5731		0.6889		1.05244	0.299238		-1.21487
6977	LPC(20:4)	Lysophosphatidylcholine	LPC Ester	53481	GC-FID	100009629		0.6067	0.6535		0.6301		1.07751	0.357825		-1.25036
7241	LPE(22:6)	Lysophosphatidylethanolamine	LPE Ester	53649	GC-FID	100009797		0.6143	0.6509		0.6326		1.08981	0.357629		-1.27844
6974	LPC(20:1)	Lysophosphatidylcholine	LPC Ester	53813	GC-FID	100009961		0.6904	0.6073		0.64885		0.99544	0.178008		-1.94705
10593	MAG(18:0)	MAG	Ester	62009	GC-FID	100020136		0.7876	0.8961		0.84185		1.00252	0.0806934		-1.99117

## Sheet: ScaledImpData INDIVIDUAL
							SAMPLE NAME	QMUL-00224-01	QMUL-00225-01	QMUL-00226-01	QMUL-00227-01	QMUL-00228-01	QMUL-00229-01	QMUL-00230-01	QMUL-00231-01	QMUL-00232-01	QMUL-00233-01	QMUL-00234-01	QMUL-00235-01	QMUL-00236-01	QMUL-00237-01	QMUL-00238-01	QMUL-00239-01	QMUL-00240-01	QMUL-00241-01	QMUL-00242-01	QMUL-00243-01	QMUL-00244-01	QMUL-00245-01	QMUL-00246-01	QMUL-00247-01	QMUL-00248-01	QMUL-00252-01	QMUL-00253-01
							PARENT SAMPLE ID	6049942	6049943	6049944	6049945	6049946	6049947	6049948	6049949	6049950	6049951	6049952	6049953	6049954	6049955	6049956	6049957	6049958	6049959	6049960	6049961	6049962	6049963	6049964	6049965	6049966	6049970	6049971
							CLIENT IDENTIFIER	S2-003-31818	S2-003-31815	S2-003-31831	S2-003-31834	S2-003-31830	S2-003-31806	S2-003-31811	S2-003-31814	S2-003-31824	S2-003-31820	S2-003-31842	S2-002-34108	S2-002-34107	S2-002-34095	S2-002-34077	S2-002-34075	S2-002-34102	S2-002-34112	S2-002-34071	S2-002-34089	S2-002-34096	S2-002-34099	S00005-001	S00005-001	S2-006-00001	S2-003-31832	S2-002-34080
							AMOUNT EXTRACTED CLP	50	50	50	50	50	50	50	50	50	50	50	50	50	50	50	50	50	50	50	50	50	50	50	50	50	50	50
							CLP IS LOT	LIS-CM-021519	LIS-CM-021519	LIS-CM-021519	LIS-CM-021519	LIS-CM-021519	LIS-CM-021519	LIS-CM-021519	LIS-CM-021519	LIS-CM-021519	LIS-CM-021519	LIS-CM-021519	LIS-CM-021519	LIS-CM-021519	LIS-CM-021519	LIS-CM-021519	LIS-CM-021519	LIS-CM-021519	LIS-CM-021519	LIS-CM-021519	LIS-CM-021519	LIS-CM-021519	LIS-CM-021519	LIS-CM-021519	LIS-CM-021519	LIS-CM-021519	LIS-CM-021519	LIS-CM-021519
							ORIG ORDER	1	2	3	4	5	6	7	8	9	10	11	12	13	14	15	16	17	18	19	20	21	22	23	24	25	29	30
							SPL AMNT	250ul	250ul	250ul	250ul	250ul	250ul	250ul	250ul	250ul	250ul	250ul	250ul	250ul	250ul	250ul	250ul	250ul	250ul	250ul	250ul	250ul	250ul	250ul	250ul	250ul	250ul	250ul
							SPL TYPE	Plasma	Plasma	Plasma	Plasma	Plasma	Plasma	Plasma	Plasma	Plasma	Plasma	Plasma	Plasma	Plasma	Plasma	Plasma	Plasma	Plasma	Plasma	Plasma	Plasma	Plasma	Plasma	Plasma	Plasma	Plasma	Plasma	Plasma
PATHWAY SORTORDER	BIOCHEMICAL	SUPER PATHWAY	SUB PATHWAY	COMP ID	PLATFORM	CHEMICAL ID	Group HMDB																							HAO1 knockout individual	HAO1 knockout individual
7944	CE(22:2)	Cholesterol Ester	CE Ester	53269	GC-FID	100009417		0.8618	0.9279	0.591	1.1445	0.6246	0.77	1.2324	0.8412	1.1039	1.3398	1.0702	0.7925	1.0452	0.7894	0.5448	1.3061	1.346	1.1295	0.8674	1.0365	1.2006	0.9535	1.0446	0.9635	1.2025	1.8752	0.7769
8024	DAG(14:0/14:0)	Diacylglycerol	DAG Ester	53270	GC-FID	100009418		0.4382	0.4382	1.3746	0.4382	0.8516	0.7067	0.6784	0.7385	2.3251	3.3392	1.3569	0.4382	0.4382	0.4382	0.682	0.5194	0.9859	0.4382	0.4382	0.6714	1	1.106	1.2226	1.0247	1.1201	0.4382	0.4382
8055	DAG(16:0/18:2)	Diacylglycerol	DAG Ester	53271	GC-FID	100009419		0.4163	0.847	1.9253	0.8611	1.8995	1.2605	0.5426	1.2761	1.4917	9.3571	1.4122	1.0358	0.8927	0.9911	0.7853	0.5778	1.0089	1.0205	0.7342	0.667	2.0326	1.8672	1.5502	1.632	0.9113	1.5615	0.3069
8071	DAG(16:1/20:4)	Diacylglycerol	DAG Ester	53272	GC-FID	100009420		0.5504	0.8947	1.7654	0.6711	2.864	1.0132	0.6228	2.3399	0.693	8.2895	1.8004	0.875	1.2632	1.443	0.9101	0.6338	1.1535	1.1557	0.9561	0.6798	1.6425	3.6447	1.3246	1.2741	0.9868	1.5	0.3794
8079	DAG(18:0/18:2)	Diacylglycerol	DAG Ester	53273	GC-FID	100009421		0.5666	1.0105	1.6424	0.8833	1.6517	1.0955	0.5103	1.0826	1.3442	8.6952	1.0302	0.8327	0.7026	0.8566	0.8028	0.6058	1.0253	1.0761	0.7793	0.5915	1.8978	1.6	1.8098	1.5004	0.8629	1.5482	0.3141
8082	DAG(18:0/22:6)	Diacylglycerol	DAG Ester	53274	GC-FID	100009422		0.6885	1.0164	2.9713	0.5082	1.4098	3.3607	1.5943	1.1516	1.0492	5.0738	0.9754	1	0.6762	1.5287	1.8074	0.8115	0.7992	0.8074	0.6107	0.5656	2.4344	0.5451	0.7992	0.5082	1.082	1.4549	0.6434
8083	DAG(18:1/18:1)	Diacylglycerol	DAG Ester	53275	GC-FID	100009423		0.9368	2.1049	1.0623	1.0405	1.8012	1.0118	0.6336	0.8631	1.6809	6.4974	1.0579	1.2774	0.5874	0.7201	1.5815	0.3098	0.9671	1.0755	0.7099	0.8965	1.0826	1.3281	0.9882	1.0518	0.7548	1.0526	0.3813
8084	DAG(18:1/18:2)	Diacylglycerol	DAG Ester	53276	GC-FID	100009424		0.4356	1.0149	1.4495	0.9603	1.7578	1.1679	0.5031	1.0136	1.4963	6.8774	0.7669	1.0126	0.6228	0.8391	0.8605	0.568	1.016	1.0263	0.9874	0.6999	1.7326	1.1587	1.2551	1.1014	0.7105	1.6528	0.3218
8089	DAG(18:1/20:5)	Diacylglycerol	DAG Ester	53277	GC-FID	100009425		0.5009	1.8125	2.3157	0.5894	1.8986	0.9514	0.6778	1.2315	0.6935	15.8583	0.6907	0.5491	0.663	1.7074	2.069	1.8204	1.1704	1.1796	0.5181	0.4852	1.7542	1.2611	0.6139	0.5977	1.1324	1.8523	0.3148
8090	DAG(18:1/22:4)	Diacylglycerol	DAG Ester	53278	GC-FID	100009426		0.6428	1.2855	1.3429	0.7551	2.4731	0.9773	0.5974	1.3286	1.5508	7.1804	1.2569	0.994	0.8196	1.2378	1.006	0.6332	1.3166	1.8136	0.8769	0.8435	1.5388	2.0669	0.8411	1.1446	0.9821	1.8017	0.6691
8094	DAG(18:2/18:3)	Diacylglycerol	DAG Ester	53279	GC-FID	100009427		0.3973	0.9104	1.6238	0.8525	2.3815	0.9995	0.7004	1.2686	1.0522	6.5753	0.4539	0.9419	0.7072	1.4646	1.0005	0.8484	1.1067	1.2051	2.1164	0.7397	1.8975	1.42	1.4804	1.39	0.6277	2.815	0.2
7972	DCER(20:0)	Sphingolipids	Dihydroceramide	53280	GC-FID	100009428		0.9663	0.8437	1.0107	0.6661	1.0231	0.6856	1.238	0.8011	1.3996	1.8277	1.1563	0.8561	0.9858	0.9876	0.9893	1.0266	0.8597	0.8952	0.7584	0.6892	1.0213	1.1421	1.0178	1.1652	1.0533	1.1456	0.9822
7980	DCER(26:1)	Sphingolipids	Dihydroceramide	53281	GC-FID	100009429		0.8597	0.8597	0.8597	0.8597	0.8597	0.8597	0.8597	0.8597	0.8597	0.8597	0.8597	0.8597	0.8597	0.8597	1.5297	1.067	0.8597	0.8597	0.8597	0.8597	0.8597	0.8597	0.8597	0.8597	0.8597	0.8597	0.8597
7920	FFA(22:2)	Free Fatty Acids	Polyunsaturated FFA (PUFA)	53283	GC-FID	100009431		0.8789	1.0882	0.983	0.9757	1.148	1.228	1.0401	1.0437	0.7305	0.7337	1.0906	0.9431	1.0223	0.9895	0.9774	1.0693	1.0777	0.9177	1.0664	1.2704	0.9616	1.217	0.9385	0.9899	0.9661	1.0101	1.0796
7993	LCER(14:0)	Sphingolipids	Lactosylceramide	53284	GC-FID	100009432		1.0709	0.7773	0.7656	1.0259	0.3061	0.7606	1.8674	0.7882	1.8132	0.4646	0.8332	0.965	1.2911	0.5279	0.4454	1.2702	1.5129	2.0575	0.9675	1.2969	1.2402	1.4712	0.8624	0.9741	0.598	0.9566	1.3411
6962	LPC(14:0)	Lysophosphatidylcholine	LPC Ester	53285	GC-FID	100009433		0.7692	0.7692	0.7692	0.7692	0.7692	0.7692	0.7692	0.7692	0.7692	0.7692	0.7692	0.7692	0.7692	0.7692	0.7692	0.7692	0.7692	0.7692	0.7692	0.7692	0.7692	0.7692	0.7692	0.7692	0.7692	0.7692	0.7692
6964	LPC(15:0)	Lysophosphatidylcholine	LPC Ester	53286	GC-FID	100009434		0.9749	0.7105	1.1298	0.9876	0.7475	0.5407	1.0207	1.0962	1.7198	1.0028	0.895	1.2874	0.9954	1.0199	0.8793	0.7249	1.0858	1.0098	0.8785	0.8545	0.8357	1.3332	0.9383	1.0129	0.8462	0.9972	1.1464
6965	LPC(16:0)	Lysophosphatidylcholine	LPC Ester	53287	GC-FID	100009435		0.9128	1.1272	1.0857	0.8294	1.0083	0.6946	0.9265	0.9917	1.0161	1.1234	0.8877	0.8266	1.0981	0.9141	1.1684	0.8858	0.9114	0.8254	0.7906	0.9843	1.1103	1.2416	1.0182	1.0607	0.973	1.3065	0.915
7226	LPE(18:1)	Lysophosphatidylethanolamine	LPE Ester	53288	GC-FID	100009436		2.1614	1.7353	0.5159	0.9199	1.6869	0.239	1.0422	1.7687	0.8982	1.1787	1.0235	0.6122	1.8691	0.845	2.3185	0.6369	0.8562	0.9765	0.4801	1.243	0.4359	0.8944	1.1506	1.0627	0.8367	0.8269	0.7771
7230	LPE(20:0)	Lysophosphatidylethanolamine	LPE Ester	53289	GC-FID	100009437		0.6783	0.6783	0.6783	0.6783	0.6783	0.6783	0.6783	0.6783	0.6783	0.6783	0.6783	0.6783	0.6783	0.6783	0.6783	0.6783	0.6783	0.6783	0.6783	0.6783	0.6783	0.6783	0.6783	0.6783	0.6783	1	0.6783
6755	PC(14:0/14:0)	Phosphatidylcholine	PC Ester	53293	GC-FID	100009441		1	1	1	1	1	1	1	1	1	1	1	1	1	1	1	1	1	1	1	1	1	1	1	1	1	1	1
6760	PC(14:0/18:3)	Phosphatidylcholine	PC Ester	53294	GC-FID	100009442		0.9275	0.9275	0.9275	0.9275	0.9275	0.9275	0.9275	0.9275	0.9275	0.9275	0.9275	0.9275	0.9275	0.9275	0.9275	0.9275	0.9275	0.9275	0.9275	0.9275	0.9275	0.9275	0.9275	1.0725	0.9275	0.9275	0.9275
6778	PC(15:0/20:4)	Phosphatidylcholine	PC Ester	53295	GC-FID	100009443		0.7374	0.8648	1.2845	1.1214	0.6965	0.6965	1.1173	0.7937	0.8505	1.8324	1.0841	0.8504	0.7214	1.2776	0.991	0.6965	0.8191	1.4687	0.9356	0.6965	1.0502	1.4412	0.6965	0.9111	0.6965	1.1758	0.6965
6795	PC(16:0/20:3)	Phosphatidylcholine	PC Ester	53296	GC-FID	100009444		0.626	0.8232	1.1763	0.6039	1.0132	0.7718	0.8049	1.0471	1.0413	1.5573	1.8711	1.2612	0.6251	0.4688	0.4345	0.739	0.9101	0.9247	0.6478	1.1157	1.0396	1.7551	0.9998	1.0002	1.0243	1.2235	0.481
6810	PC(17:0/20:5)	Phosphatidylcholine	PC Ester	53298	GC-FID	100009446		0.7827	0.7827	0.7827	0.7827	0.7827	0.7827	0.7827	0.7827	0.7827	0.7827	0.7827	0.7827	0.7827	0.7827	0.9929	0.7827	0.7827	1.2323	0.7827	0.7827	0.7827	0.7827	0.7827	0.7827	0.7827	0.7827	0.7827
6824	PC(18:0/20:1)	Phosphatidylcholine	PC Ester	53299	GC-FID	100009447		0.8809	0.8809	0.8809	0.8809	0.8809	0.8809	0.8809	0.9432	1.2556	1.0435	0.8809	1	0.8809	0.8809	0.8809	0.8809	0.8809	0.8809	0.8809	0.8809	0.8809	1.3744	0.8809	0.8809	0.8809	0.9031	0.8809
6825	PC(18:0/20:2)	Phosphatidylcholine	PC Ester	53300	GC-FID	100009448		0.8809	0.654	1.1901	0.5337	0.7984	0.6997	0.7877	0.9948	1.3074	1.1582	1.1551	1.1873	0.6252	0.5388	0.3956	1.0052	1.3282	1.0331	0.8453	1.299	0.8649	1.7054	1.3066	1.198	1.3188	1.1384	0.5426
6852	PC(18:2/18:2)	Phosphatidylcholine	PC Ester	53304	GC-FID	100009452		1.6219	0.9971	0.8212	0.9062	0.6206	0.4805	1.0029	0.6873	1.4126	1.1815	0.7478	0.8388	1.5969	0.5256	0.7106	1.7138	0.9231	1.408	0.9767	1.0398	0.943	0.7637	1.6361	1.4985	0.9353	1.1981	1.0368
6855	PC(18:2/20:1)	Phosphatidylcholine	PC Ester	53305	GC-FID	100009453		1.4689	0.694	1.1006	0.9994	0.7215	0.6795	0.7084	0.9116	1.0212	0.8804	0.6795	1.4947	0.852	0.6795	1.2382	1.5342	1.0159	1.2448	1.0773	0.7506	0.7364	0.8505	1.1406	0.7848	0.7997	1	0.6795
6867	PC(20:0/18:1)	Phosphatidylcholine	PC Ester	53306	GC-FID	100009454		0.9158	1.5584	0.9392	0.9943	0.7152	0.6964	0.9029	0.6964	1.2561	1.9578	0.9605	1.1191	0.8476	0.8417	0.9947	1	1.1856	1.077	0.8763	0.8448	0.6964	1.5314	0.8201	0.6964	1.6548	1.1193	1.0053
6868	PC(20:0/18:2)	Phosphatidylcholine	PC Ester	53307	GC-FID	100009455		1.2119	0.8346	0.8504	0.7191	0.6561	0.8522	0.7904	0.7464	1.4449	1.7488	0.8789	0.8544	1.1754	0.627	0.5319	1.2706	1.1042	0.9976	0.7482	0.9983	1.0334	1.0017	1.5386	1.228	1.1424	1.2974	0.7306
6874	PC(20:0/20:4)	Phosphatidylcholine	PC Ester	53308	GC-FID	100009456		0.894	1.0195	0.7663	0.9607	1.3483	1.1371	1.1576	1.0118	0.9128	2.1196	1.097	1.4078	0.7635	0.8031	0.6572	0.9782	1.0915	1.5131	0.7285	0.9271	1.1337	0.749	0.7865	0.9566	0.9882	1.577	0.9595
7086	PE(18:0/22:5)	Phosphatidylethanolamine	PE Ester	53319	GC-FID	100009467		0.3456	1.2735	1.5858	0.3805	2.0184	0.8002	0.5197	0.98	0.9099	4.4096	1.0823	0.9261	0.7469	0.8681	1.1615	0.5529	1.1393	1.3082	0.3904	0.934	1.183	1.4484	1.0799	1.02	1.0373	1.4393	0.4113
7090	PE(18:1/18:1)	Phosphatidylethanolamine	PE Ester	53321	GC-FID	100009469		2.0792	2.6886	0.6187	1.0912	3.1862	0.3395	0.771	1.0178	1.6998	3.6382	1.8411	0.9822	0.9126	0.5083	1.6177	0.6594	1.2504	0.9663	0.4444	0.7146	0.6207	0.4635	1.3088	1.459	0.5436	0.8961	0.4046
7102	PE(18:1/22:4)	Phosphatidylethanolamine	PE Ester	53323	GC-FID	100009471		0.7607	0.7607	0.7607	0.7607	0.7607	0.7607	0.7607	0.7607	0.7607	1.2834	0.7607	0.7607	0.7607	0.7607	0.7607	0.7607	1.1036	0.7607	0.7607	0.7607	0.7607	1.1856	0.7607	0.7607	0.8964	0.7607	0.7607
7103	PE(18:1/22:5)	Phosphatidylethanolamine	PE Ester	53324	GC-FID	100009472		1	1.454	1.2522	0.9699	1.3923	1.1254	0.9879	0.8816	1.2471	2.25	1.1342	0.996	1.0868	0.9268	1.1812	0.9474	0.8485	1.196	0.7471	0.7471	0.9349	1.0482	0.9213	0.9596	0.7985	1.0934	0.7684
7107	PE(18:2/18:2)	Phosphatidylethanolamine	PE Ester	53325	GC-FID	100009473		1.2	0.7272	0.5021	0.9967	0.9113	0.5021	0.5021	1.1757	1.0494	2.5105	0.605	0.6586	1.1414	0.6033	1.0033	1.0259	0.8544	0.9925	0.5021	0.7682	0.5021	0.7322	1.3791	1.4879	0.6159	1.0519	0.5389
7132	PE(O-16:0/20:4)	Phosphatidylethanolamine	PE Ether	53329	GC-FID	100009477		0.9567	0.7166	0.8691	1.0214	1.2641	1.2547	1.0924	0.4358	0.6848	1.5671	1.4006	0.6177	0.6689	0.7103	0.4696	1.0156	1.8013	1.5696	0.7828	1.2384	0.7449	1.1092	0.6698	0.7566	1.3294	1.6092	1.7667
7137	PE(O-16:0/22:5)	Phosphatidylethanolamine	PE Ether	53331	GC-FID	100009479		0.9976	0.7527	1.0024	0.8916	1.2545	0.6656	1.0088	0.8	0.8667	1.5482	0.7615	0.7527	0.9076	0.6194	0.5117	1.1091	1.2712	1.3515	0.7717	1.341	0.5152	1.57	0.7972	1.0563	1.8135	1.253	1.6073
7138	PE(O-16:0/22:6)	Phosphatidylethanolamine	PE Ether	53332	GC-FID	100009480		1.2589	0.804	1.1596	0.556	1.1085	1.1337	1.0708	0.556	0.8626	1.1643	0.9589	0.8528	0.676	0.9285	0.556	0.9936	1.0818	1.2834	0.7449	1	1.3357	0.556	1.1134	0.7314	1.1075	1.7933	0.9191
7149	PE(O-18:0/20:3)	Phosphatidylethanolamine	PE Ether	53335	GC-FID	100009483		0.7878	0.7878	0.7878	0.7878	0.7878	0.7878	0.7878	0.7878	1.2149	0.7878	0.7878	0.7878	0.7878	0.7878	0.7878	0.7878	0.7878	1.4125	0.7878	0.9266	0.7878	1.0525	0.9212	0.7878	0.9475	0.7878	0.9286
7164	PE(P-16:0/18:1)	Phosphatidylethanolamine	PE Plasmalogen	53336	GC-FID	100009484		1.3519	1.2296	0.5728	0.6144	0.7044	0.5303	0.709	0.9189	1.1148	1.3878	0.9528	0.9365	0.8697	0.5154	0.9657	1.0278	1.1308	1.6781	0.5584	1.1264	0.9403	1.6734	0.8513	1.0576	1.2634	1.0941	1.4639
7180	PE(P-18:0/16:0)	Phosphatidylethanolamine	PE Plasmalogen	53337	GC-FID	100009485		0.939	0.8773	0.65	1	0.65	0.65	0.65	0.8604	1.2331	1.4299	1.0571	0.8987	0.7299	0.65	0.8669	1.1364	1.2364	1.0364	0.65	0.739	0.711	1.2117	0.8727	1.2357	1.5	1.1669	1.1474
7183	PE(P-18:0/18:1)	Phosphatidylethanolamine	PE Plasmalogen	53338	GC-FID	100009486		1.5887	1.465	0.5674	0.8811	0.8413	0.5669	0.8268	1.0341	1.0088	1.9398	0.8234	0.8634	0.8862	0.5208	0.6392	1.1719	1.0053	1.665	0.6124	0.9947	0.6987	1.3713	0.7104	0.739	1.7103	1.0649	1.2379
7188	PE(P-18:0/20:2)	Phosphatidylethanolamine	PE Plasmalogen	53340	GC-FID	100009488		1	1	1	1	1	1	1	1	1	1	1	1	1	1	1	1	1	1	1	1	1	1	1	1	1	1	1
7213	PE(P-18:1/22:5)	Phosphatidylethanolamine	PE Plasmalogen	53343	GC-FID	100009491		1.667	0.9865	0.695	0.7355	1.0087	0.8498	1.2344	0.5761	1.0859	2.7367	0.6542	0.9372	1.0977	0.808	1.3404	0.9692	0.9913	1.572	0.5245	1.2851	0.985	1.2932	0.9514	0.8722	1.7453	1.098	1.4163
7498	PI(16:0/18:1)	Phosphatidylinositol	PI Ester	53344	GC-FID	100009492		1.0092	1.0283	1.0297	0.5319	0.8612	0.3972	0.904	0.6433	1.3557	1.3311	1.6598	1.1382	1.2587	0.3158	0.4784	0.7132	1.4434	0.7579	0.7066	1.2134	0.6747	1.9728	1.041	1.1923	0.9908	0.9477	0.8018
7530	PI(18:0/16:0)	Phosphatidylinositol	PI Ester	53345	GC-FID	100009493		0.8939	0.8971	0.8927	1.0294	0.7872	0.5744	0.8767	0.5744	1.0556	1.076	1.9751	2.1732	0.5744	0.5744	0.5744	0.5744	1.2556	0.816	0.5744	1	0.9553	1.5476	1.1923	0.8581	0.9655	0.5744	0.6422
7549	PI(18:1/18:1)	Phosphatidylinositol	PI Ester	53346	GC-FID	100009494		3.0591	1.4466	0.7824	0.8205	0.8673	0.319	0.9121	0.6079	1.5119	1.0217	0.9469	1.6142	1.2946	0.2836	0.9916	0.9947	1.2632	1.0053	0.8135	1.2204	0.6506	1.1636	0.9866	1.0883	0.6363	0.7965	1.0116
8011	SM(22:0)	Sphingolipids	Sphingomyelin	53347	GC-FID	100009495		1.1344	0.9677	0.8249	0.8553	0.8788	0.7898	0.9867	0.8672	1.4762	1.8676	0.9473	1.0491	0.99	0.7662	0.5818	1.4352	1.307	1.1583	0.8325	0.9399	1.2236	1.1152	1.3289	1.2047	1.3013	1.5789	0.8145
8016	SM(26:1)	Sphingolipids	Sphingomyelin	53348	GC-FID	100009496		1.0091	1.0188	0.9614	0.8975	0.7542	0.674	1.1785	0.8453	1.51	1.4571	1.0033	1.2437	0.9601	0.9936	0.9411	1.1134	1.3181	1.0452	0.8312	1.0281	0.9967	1.2376	1.1768	0.9603	0.9252	1.3012	1.2853
8409	TAG40:0-FA14:0	Triacylglycerol	TAG Ester	53349	GC-FID	100009497		1.2478	0.4513	5.053	0.9517	0.9596	0.3325	1.4268	1.0404	30.2977	5.7815	10.4181	0.2993	0.7379	0.19	2.5241	0.2644	0.7189	0.5495	0.312	0.3167	1.6263	1.365	4.2138	4.5352	0.3341	0.2597	0.4545
8436	TAG42:1-FA14:0	Triacylglycerol	TAG Ester	53350	GC-FID	100009498		1.3141	0.2647	3.9735	0.284	0.6907	0.1757	1.0878	1.0638	19.5764	7.2611	3.9218	0.1492	0.3983	0.3538	0.9362	0.1492	0.5042	0.568	0.1492	0.2395	1.1023	1.5572	4.0132	3.8195	0.4525	0.231	0.1757
8438	TAG42:1-FA16:0	Triacylglycerol	TAG Ester	53351	GC-FID	100009499		1.2371	0.3442	3.7448	0.673	2.8965	0.1399	1.3115	1.5332	11.3597	12.99	3.198	0.1835	0.6894	0.5495	0.8165	0.1272	0.8592	0.6249	0.1462	0.2916	1.1408	4.8619	4.8892	4.1517	0.802	0.3569	0.158
8445	TAG42:2-FA18:2	Triacylglycerol	TAG Ester	53352	GC-FID	100009500		0.8187	0.3147	3.8565	1.0314	1.7076	0.3456	0.874	1.4173	8.689	10.9176	11.7459	0.1808	0.9686	0.4646	1.9926	0.2903	0.5976	0.5284	0.37	0.3434	1.429	1.4981	3.9351	3.5673	0.4678	0.387	0.4051
8490	TAG44:2-FA16:0	Triacylglycerol	TAG Ester	53353	GC-FID	100009501		0.8377	0.3764	4.1734	0.5177	2.5897	0.2495	1.0215	1.8219	7.6148	14.0036	2.3303	0.2169	0.7057	0.5074	0.9785	0.2625	1.1074	0.817	0.2237	0.3526	1.5118	3.0562	5.4952	5.0976	0.6456	0.5374	0.1843
8541	TAG46:0-FA16:0	Triacylglycerol	TAG Ester	53354	GC-FID	100009502		0.5163	0.3835	3.5444	0.4168	2.4973	0.3957	0.9364	1.141	8.4722	20.3185	7.0752	0.4341	0.9823	0.5295	0.8473	0.1578	1.0177	0.6647	0.1416	0.4901	2.4457	3.5809	3.3356	2.9033	1.7644	0.7041	0.2656
8550	TAG46:1-FA16:0	Triacylglycerol	TAG Ester	53355	GC-FID	100009503		0.529	0.3371	2.4211	0.5658	1.5414	0.3028	0.5518	1.0902	3.9571	10.1584	5.7929	0.375	0.9689	0.4432	1.6167	0.1235	0.8464	0.5856	0.2077	0.398	2.0686	2.9709	2.6013	2.2471	1.0709	0.6653	0.3484
8563	TAG46:2-FA16:0	Triacylglycerol	TAG Ester	53356	GC-FID	100009504		0.5277	0.2883	3.3589	0.6519	1.6985	0.3727	0.5559	1.4585	3.3917	9.8832	6.1466	0.3215	1.1483	0.5447	1.7961	0.2175	0.9519	0.6833	0.4194	0.4238	2.9276	2.411	3.3444	3.0775	0.888	0.9361	0.2901
8573	TAG46:3-FA14:1	Triacylglycerol	TAG Ester	53357	GC-FID	100009505		0.8562	0.4174	3.2428	0.5779	1.1559	0.6074	0.693	1.4796	5.0863	8.0428	1.4033	0.6783	0.6756	0.7559	1.101	0.3987	0.9445	1.0555	0.7171	0.7438	2.0321	2.2475	3.5746	2.7906	0.8669	0.8977	0.1592
8614	TAG47:1-FA15:0	Triacylglycerol	TAG Ester	53358	GC-FID	100009506		0.782	0.517	2.6163	0.5932	0.981	0.4902	0.8018	1.218	7.484	10.199	2.8512	0.9257	0.8673	0.7353	0.93	0.2038	1.0963	1.1542	0.3706	0.4757	2.0783	3.7957	2.6994	2.5149	1.019	0.8506	0.4076
8666	TAG48:1-FA16:0	Triacylglycerol	TAG Ester	53359	GC-FID	100009507		0.4717	0.7774	2.0683	0.5638	2.0079	0.6054	0.505	1.1688	3.2253	13.458	4.0287	0.8084	0.8696	0.7252	1.0158	0.2117	1.0883	0.8965	0.2783	0.5741	2.0837	2.8894	2.2567	2.0207	1.5401	0.9842	0.3194
8680	TAG48:2-FA16:0	Triacylglycerol	TAG Ester	53360	GC-FID	100009508		0.4019	0.46	2.7172	0.6006	1.5991	0.7571	0.5175	1.1956	2.591	9.8691	2.5572	0.6897	0.8275	0.9094	0.8085	0.3539	1.0869	0.9615	0.546	0.543	2.435	2.4475	2.473	2.2302	1.2422	1.2612	0.2397
8705	TAG48:4-FA14:0	Triacylglycerol	TAG Ester	53361	GC-FID	100009509		0.501	0.4281	2.2341	0.6022	1.5585	0.5822	0.5388	1.0081	2.0929	8.4242	1.5674	0.8835	0.6144	1.2705	1.3561	0.5694	1.1337	0.9919	0.849	0.5154	2.4676	1.4495	2.7184	2.3976	1.0092	1.6486	0.164
8707	TAG48:4-FA16:0	Triacylglycerol	TAG Ester	53362	GC-FID	100009510		0.4775	0.456	1.9772	0.5198	1.7253	0.3902	0.5594	1.3741	2.1269	9.6595	1.8227	0.5688	0.6917	0.961	1.1323	0.3405	1.0934	1.0383	0.5191	0.4876	1.5017	1.9913	6.8717	5.9167	0.9617	1.2042	0.2606
8747	TAG49:0-FA18:0	Triacylglycerol	TAG Ester	53363	GC-FID	100009511		0.8999	0.6068	2.7526	0.6115	1.063	0.4484	0.9968	1.0032	9.9039	13.4208	2.4429	0.5642	0.5162	0.5422	0.6028	0.2065	0.8802	1.0362	0.2309	0.6115	1.8235	2.6998	2.7478	2.4578	1.0709	0.9031	0.6367
8754	TAG49:1-FA15:0	Triacylglycerol	TAG Ester	53364	GC-FID	100009512		0.7727	0.9668	1.9655	0.7695	1.1596	0.6035	0.6288	0.9805	4.9414	11.6848	1.8703	1.0069	0.8511	0.7289	0.819	0.1842	1.1542	1.2393	0.2822	0.6122	1.6481	2.5217	2.0345	1.6889	0.9385	0.9931	0.5292
8759	TAG49:1-FA18:1	Triacylglycerol	TAG Ester	53365	GC-FID	100009513		0.7401	0.8848	1.783	0.729	1.1059	0.6118	0.7248	0.9034	4.8819	10.1245	1.8773	1.0019	0.8207	0.7512	0.7988	0.1906	1.1898	1.1806	0.3327	0.5905	1.6425	2.2432	1.8447	1.5742	0.8717	0.9981	0.4974
8771	TAG49:2-FA17:0	Triacylglycerol	TAG Ester	53366	GC-FID	100009514		0.6437	0.3254	2.4262	0.6408	0.9271	0.6313	0.5969	1.1944	3.5945	8.4956	1.5471	0.6586	0.7753	1.0883	0.7416	0.3889	0.9407	1.3112	0.6218	0.5779	2.7753	2.6384	2.5536	2.1535	0.9087	1.2341	0.3444
8782	TAG49:3-FA16:0	Triacylglycerol	TAG Ester	53367	GC-FID	100009515		0.5743	0.5371	1.7623	0.692	1.24	0.6051	0.6063	1.184	2.6583	8.4806	1.26	0.7417	0.6754	0.9709	0.7914	0.3423	1.0537	1.2131	0.5463	0.5931	1.9783	1.7371	2.4406	2.1691	0.9046	1.4446	0.3777
8783	TAG49:3-FA16:1	Triacylglycerol	TAG Ester	53368	GC-FID	100009516		0.5283	0.4506	1.865	1.1592	1.0979	0.9487	0.6588	1.4193	2.6624	5.5503	1.4495	0.9869	0.7596	1.1032	0.8839	0.467	1.0131	1.3407	0.8502	0.7503	2.3729	2.9332	2.3449	2.1878	0.7605	1.3643	0.3871
8843	TAG50:2-FA14:1	Triacylglycerol	TAG Ester	53369	GC-FID	100009517		1.3813	1.1212	1.1112	0.7038	1.4153	0.4972	0.5782	1.0461	3.5597	8.1233	1.1359	0.5947	0.4397	0.6404	1.4822	0.1468	0.9539	0.8723	0.388	0.7056	0.84	1.5181	1.8433	1.6137	0.7596	0.6399	0.3258
8690	TAG48:3-FA12:0	Triacylglycerol	TAG Ester	53370	GC-FID	100009518		0.7366	0.4085	2.8267	0.7406	1.3757	0.4313	0.5313	1.2491	2.3985	6.236	4.2486	0.568	0.7402	0.7777	2.4799	0.3687	0.9565	0.7578	1.1391	0.4919	2.3639	1.1005	2.065	1.9879	0.4797	1.2659	0.3027
8876	TAG50:4-FA16:0	Triacylglycerol	TAG Ester	53371	GC-FID	100009519		0.3641	0.6612	1.3643	0.6557	1.6887	0.7738	0.484	1.1177	1.1229	7.1138	1.2941	0.819	0.5728	1.2356	1.1845	0.4459	0.9807	1.0315	0.5905	0.4988	1.5537	1.6459	2.4544	2.2063	1.0193	1.4217	0.224
8895	TAG50:5-FA18:2	Triacylglycerol	TAG Ester	53372	GC-FID	100009520		0.6448	0.4262	2.1759	0.9136	1.4483	0.9445	0.6218	1.3179	1.8456	8.0975	0.8869	1.1964	0.4416	1.7036	1.6585	0.9905	0.9338	1.0209	1.6888	0.6784	2.3667	1.0095	3.0978	2.782	0.8321	1.9216	0.1921
8947	TAG51:1-FA15:0	Triacylglycerol	TAG Ester	53373	GC-FID	100009521		1.0249	1.2099	1.2875	0.8505	1.0461	0.4525	0.731	0.993	3.8402	8.5887	1.0437	0.9487	0.6093	0.6454	0.9566	0.2117	0.9433	1.0667	0.407	0.6627	1.2235	1.6779	1.7934	1.5896	0.7097	0.9736	0.5505
8962	TAG51:2-FA16:0	Triacylglycerol	TAG Ester	53374	GC-FID	100009522		0.5212	0.9037	1.4964	0.8794	1.4764	0.833	0.5955	1.3492	2.5007	9.036	1.6112	0.962	0.8406	0.9532	1.1236	0.3933	1.038	1.2252	0.5315	0.6637	1.995	2.4832	1.8041	1.6865	1.0529	1.3372	0.5797
8963	TAG51:2-FA16:1	Triacylglycerol	TAG Ester	53375	GC-FID	100009523		0.5682	0.857	1.1601	1.0029	1.502	0.7209	0.6091	1.4658	2.6228	7.6173	1.9214	1.0356	0.7689	0.971	1.3788	0.3044	0.9958	1.4049	0.5146	0.7581	1.7668	2.9538	1.8581	1.7172	0.9971	1.1688	0.4703
8977	TAG51:3-FA16:1	Triacylglycerol	TAG Ester	53376	GC-FID	100009524		0.5075	0.6702	1.313	0.9688	1.3987	0.8075	0.5243	1.2111	2.0639	5.5796	1.2908	1.0312	0.6692	1.0326	1.5877	0.3491	0.798	1.0943	0.7879	0.7171	1.9911	2.2909	1.7542	1.4545	0.7848	1.2412	0.3921
8978	TAG51:3-FA17:0	Triacylglycerol	TAG Ester	53377	GC-FID	100009525		0.5806	0.6401	1.4835	0.9699	1.2775	0.9068	0.5262	1.3865	2.1178	8.3154	1.2705	0.8648	0.757	1.2829	1.0669	0.4344	1.0301	1.3802	0.8467	0.676	2.3054	2.2981	2.4785	2.01	0.9594	1.5816	0.4078
8980	TAG51:3-FA18:1	Triacylglycerol	TAG Ester	53378	GC-FID	100009526		0.9117	1.0287	1.1534	1.0221	0.9705	1.0024	0.8829	0.9976	1.5819	2.9062	0.944	1.0579	0.9029	1.0332	1.0657	0.8137	0.9906	1.1097	0.9742	0.9156	1.2508	1.1038	1.1987	1.1246	0.9391	1.1123	0.8863
9041	TAG52:1-FA16:1	Triacylglycerol	TAG Ester	53379	GC-FID	100009527		0.9015	1.3512	1.0554	0.8306	1.9617	0.6754	0.6032	1.2694	2.1405	9.1289	1.9513	0.7506	0.6475	0.7863	1.6865	0.334	1.0428	0.8228	0.4492	0.7867	1.3981	1.9222	1.7317	1.6812	1.2237	0.9572	0.5488
9060	TAG52:2-FA18:0	Triacylglycerol	TAG Ester	53380	GC-FID	100009528		0.5024	1.0476	1.5321	0.8277	1.9826	0.9729	0.4594	1.2165	1.8646	10.6486	1.4595	0.7644	0.6695	0.8117	1.0271	0.427	0.906	0.9473	0.5761	0.6512	1.9148	1.426	2.0929	1.8887	1.0341	1.4196	0.387
9072	TAG52:3-FA16:0	Triacylglycerol	TAG Ester	53381	GC-FID	100009529		0.4445	1.0925	1.4563	0.9994	1.6802	1.257	0.5357	1.1836	1.7101	6.3981	0.9622	1.1008	0.6376	1.0006	0.9625	0.644	0.9968	1.0354	0.8713	0.7095	1.7085	1.1882	1.4919	1.3645	0.9358	1.6845	0.4435
9091	TAG52:4-FA18:0	Triacylglycerol	TAG Ester	53382	GC-FID	100009530		0.7145	1.0017	1.3329	0.7287	1.9618	0.797	0.5336	1.1922	1.5651	9.124	0.9532	0.9983	0.4716	1.1209	1.7255	0.5784	0.9123	1.1217	0.7681	0.6435	1.7521	1.2327	2.5687	2.2456	1.0661	1.4602	0.332
9095	TAG52:4-FA20:0	Triacylglycerol	TAG Ester	53383	GC-FID	100009531		0.3705	0.7359	2.2103	0.9659	1.6584	1.6285	0.5359	1.3237	1.7534	8.4348	0.8344	0.9321	0.6086	1.318	0.9109	0.9964	0.9345	1.071	1.3964	0.6759	2.7564	1.149	2.0516	1.8607	1.0036	2.494	0.3715
9101	TAG52:4-FA22:4	Triacylglycerol	TAG Ester	53384	GC-FID	100009532		0.3503	0.5845	2.7347	0.7658	2.0373	0.9658	0.5876	1.1016	1.8052	12.0995	2.9181	0.7482	0.8819	1.4622	0.7306	0.5565	1.2974	1.0342	0.7565	0.5979	2.7855	1.8632	1.7824	1.3979	1.058	1.7005	0.2518
9120	TAG52:5-FA22:5	Triacylglycerol	TAG Ester	53385	GC-FID	100009533		0.375	0.7204	2.8444	0.6714	1.7562	0.8498	0.5489	0.9458	1.9254	9.9266	1.7123	0.9356	0.5856	1.5874	1.0542	0.5005	1.1393	1.1186	0.7177	0.6049	2.4872	1.1712	2.4571	2.0551	1.2191	2.0205	0.3157
9126	TAG52:6-FA16:1	Triacylglycerol	TAG Ester	53386	GC-FID	100009534		0.5065	0.6207	1.1758	1.0026	1.6249	1.0256	0.6025	0.9974	1.0902	5.3252	0.5547	1.1771	0.4073	1.4756	1.9225	0.6364	0.8217	1.0145	1.3229	0.5638	1.6509	0.8677	2.0663	1.7428	0.8442	1.9396	0.2314
9129	TAG52:6-FA18:2	Triacylglycerol	TAG Ester	53387	GC-FID	100009535		0.462	0.514	1.532	0.957	1.5019	1.0291	0.5272	1.0537	1.1166	5.3017	0.4731	1.1362	0.3928	1.7516	1.5781	1.1687	0.9231	0.9709	1.6848	0.602	1.9978	0.7747	2.157	1.8249	0.7105	2.2467	0.1903
9157	TAG52:8-FA16:1	Triacylglycerol	TAG Ester	53388	GC-FID	100009536		0.6508	0.7657	1.1654	0.7228	1.6723	0.5268	0.706	1.3936	2.6432	8.2236	1.7458	0.8315	0.6998	0.7657	1.294	0.3568	0.902	1.1884	0.4303	0.5926	1.3982	2.8622	1.9694	2.0766	1	1	0.4564
9215	TAG53:3-FA18:1	Triacylglycerol	TAG Ester	53389	GC-FID	100009537		0.8245	1.0056	1.0694	1.022	1.1973	0.9072	0.7717	0.9944	1.5642	3.8593	0.9215	1.0173	0.768	1.0877	1.2398	0.7606	0.9473	1.143	0.8864	0.8777	1.2654	1.1034	1.1479	1.1068	0.8697	1.231	0.7635
9216	TAG53:3-FA18:2	Triacylglycerol	TAG Ester	53390	GC-FID	100009538		0.6112	0.8694	1.5428	1.0006	1.4378	1.0322	0.5873	1.1482	2.2669	8.0185	0.8109	0.9994	0.6077	1.4534	1.1407	0.6422	0.9868	1.3798	0.9947	0.7347	2.255	1.4203	1.6714	1.5196	0.705	1.8496	0.4755
9224	TAG53:4-FA16:0	Triacylglycerol	TAG Ester	53391	GC-FID	100009539		0.537	0.9128	1.7826	0.7568	2.1617	0.8182	0.5913	1.5921	1.8473	11.879	1.8568	0.8419	0.8055	1.3458	0.9156	0.5427	1.2437	1.3075	0.6897	0.641	2.4198	1.8936	1.9622	1.5921	1.0844	1.7173	0.4959
9228	TAG53:4-FA18:1	Triacylglycerol	TAG Ester	53392	GC-FID	100009540		0.9409	1.024	1.0429	1.0387	0.9718	0.999	0.9217	1.0434	1.0939	1.5151	0.9721	1.0287	0.938	1.0154	1.0856	1.0019	0.9697	1.0342	1.001	0.9816	1.0954	0.978	0.9828	1.0127	0.9852	1.0303	0.9341
9326	TAG54:2-FA20:1	Triacylglycerol	TAG Ester	53393	GC-FID	100009541		0.7588	1.5869	1.2004	1.1917	1.616	0.807	0.5719	0.995	2.0112	7.3352	1.6323	1.0637	0.6684	0.6614	1.1488	0.3495	1.044	1.0718	0.3957	0.8178	1.0591	1.005	1.1015	1.0595	0.9901	0.9392	0.5005
9327	TAG54:2-FA20:2	Triacylglycerol	TAG Ester	53394	GC-FID	100009542		0.3745	1.1314	1.4188	0.6791	1.6774	1.0448	0.5301	1.0381	1.7519	7.472	1.7184	0.7331	0.8314	0.8686	0.9699	0.3967	0.9527	1.0301	0.5008	0.9054	1.7992	1.4243	1.2531	1.1222	1.2134	1.1757	0.4916
9344	TAG54:3-FA20:3	Triacylglycerol	TAG Ester	53395	GC-FID	100009543		0.376	1.3308	1.294	0.4856	2.3343	0.6225	0.483	1.1917	1.2872	8.4737	1.485	0.7246	0.6792	1.0203	0.8075	0.282	1.0105	1.0015	0.5316	0.7303	1.4534	1.7856	1.1445	0.9985	1.0998	1.2631	0.4202
9377	TAG54:5-FA20:2	Triacylglycerol	TAG Ester	53396	GC-FID	100009544		0.374	0.6701	1.4918	1.0166	1.6304	1.0656	0.5035	1.1476	1.3468	5.005	0.8264	0.9697	0.5831	1.297	1.0977	0.6304	0.9119	0.9834	1.4163	0.8886	1.7033	1.2057	1.5102	1.3521	0.9236	1.6637	0.32
9403	TAG54:6-FA22:5	Triacylglycerol	TAG Ester	53397	GC-FID	100009545		0.3865	0.7463	2.477	0.706	2.1025	1.1585	0.7807	1.1874	1.4572	7.6024	1.8669	0.9001	0.6714	2.0007	1.1399	0.618	1.0679	1.1711	0.6728	0.7288	2.7862	1.5807	0.9321	0.8614	1.3317	1.8136	0.3472
9413	TAG54:7-FA18:3	Triacylglycerol	TAG Ester	53398	GC-FID	100009546		0.5989	0.7161	1.297	1.0575	1.9599	1.0059	0.5678	0.9443	1.221	8.9266	0.367	1.2812	0.3381	1.804	1.9903	0.9941	0.9676	1.1096	1.56	0.5883	1.8364	0.6043	2.0426	1.8767	0.7623	2.8612	0.2177
9418	TAG54:7-FA20:5	Triacylglycerol	TAG Ester	53399	GC-FID	100009547		0.3678	1.0087	3.8979	0.8227	1.9248	0.9776	0.6744	1.3932	0.8052	14.1397	0.6289	0.7818	0.6436	2.7323	2.4601	2.615	0.9913	1.4521	0.6742	0.4989	2.9959	1.1904	1.1096	1.0292	1.2502	2.9911	0.2572
9428	TAG54:8-FA18:2	Triacylglycerol	TAG Ester	53400	GC-FID	100009548		0.5431	0.5987	2.4575	0.7777	1.6571	0.911	0.7351	0.9012	1.056	8.7066	0.4615	1.142	0.2997	1.988	2.1095	1.8923	0.944	1.2301	1.0783	0.4814	2.2814	0.4994	2.1639	1.8214	0.7918	2.6878	0.2087
9578	TAG56:1-FA16:0	Triacylglycerol	TAG Ester	53401	GC-FID	100009549		1.4204	2.1507	2.9526	3.5662	3.1252	0.3341	0.4714	1.9587	5.4933	24.6112	1.4982	0.52	0.8991	0.8566	1.4168	0.4107	0.7266	0.4702	0.226	0.5699	1.4532	0.9453	1.6634	1.3718	1.0158	0.9842	0.2734
9617	TAG56:2-FA16:0	Triacylglycerol	TAG Ester	53402	GC-FID	100009550		1.2385	1.4731	2.6418	0.9489	2.1141	0.5544	0.367	1.6196	2.8165	19.3667	1.5632	0.9003	0.7594	0.6319	1.4406	0.2952	1.0095	0.6319	0.2099	0.5692	1.4456	0.9905	1.6147	1.5505	1.0877	1.1504	0.3121
9623	TAG56:2-FA20:1	Triacylglycerol	TAG Ester	53403	GC-FID	100009551		1.863	2.1013	1.3032	2.3885	1.9573	0.68	0.5748	0.9201	2.8588	11.5261	1.1848	0.9619	0.5131	0.595	2.0506	0.4536	1.3076	1.0381	0.5162	0.9029	0.9553	0.7822	1.2592	1.3979	0.7844	1.0566	0.5197
9633	TAG56:3-FA18:2	Triacylglycerol	TAG Ester	53404	GC-FID	100009552		1.042	1.1347	1.3889	1.0174	1.6576	0.5088	0.5739	0.9969	2.4244	12.4061	0.8369	0.7592	0.5746	0.6531	1.3646	0.6328	1.0031	0.7759	0.5961	0.5589	1.0753	0.6593	1.2148	1.1719	0.6159	1.1602	0.4647
9635	TAG56:3-FA20:0	Triacylglycerol	TAG Ester	53405	GC-FID	100009553		1.2208	1.4439	0.76	1.6552	1.7965	0.533	0.8294	1.0829	2.228	11.0905	0.8913	0.7986	0.5624	0.5875	1.7706	0.9365	1.191	0.8615	0.7736	0.6768	1.0635	0.525	1.1013	1.3391	0.5148	1.0936	0.5144
9646	TAG56:4-FA18:0	Triacylglycerol	TAG Ester	53406	GC-FID	100009554		0.5168	1.0499	1.6183	0.7571	2.4292	1.139	0.682	1.1643	1.7537	7.1238	1.2137	0.8028	0.4862	1.3055	1.0323	0.5245	0.943	1.1987	0.6721	0.8194	1.5009	1.1856	0.9677	0.9529	1.0608	1.4422	0.4397
9669	TAG56:5-FA20:2	Triacylglycerol	TAG Ester	53407	GC-FID	100009555		0.5167	1.0862	1.2939	1.1381	1.6697	0.9668	0.5863	1.0171	1.2556	4.9388	0.6763	0.9109	0.6031	0.9935	1.4623	0.8069	1.0065	1.0114	1.4555	0.9113	1.3178	1.0068	1.1321	0.9868	0.6162	1.3216	0.405
9689	TAG56:6-FA20:3	Triacylglycerol	TAG Ester	53408	GC-FID	100009556		0.4978	1.2184	1.2443	1.0054	2.3236	0.8079	0.6848	1.2133	0.9946	6.7036	0.7014	0.8937	0.6639	1.2834	1.1852	0.6973	1.0871	1.2096	1.7159	0.81	1.2983	1.206	1.043	0.9354	0.781	1.7908	0.4559
9703	TAG56:7-FA18:2	Triacylglycerol	TAG Ester	53409	GC-FID	100009557		0.4072	0.8043	2.0575	0.8749	1.8786	1.0643	0.6091	1.2581	1.0047	7.8522	0.5696	0.7882	0.6227	2.0169	1.0712	1.036	1.0008	1.2397	1.3174	0.5805	2.0434	1.0397	0.9992	0.9644	0.8105	2.1668	0.3773
9708	TAG56:7-FA20:3	Triacylglycerol	TAG Ester	53410	GC-FID	100009558		0.4703	1.0128	1.4865	0.8369	2.1537	0.8459	0.68	1.333	0.7701	7.6143	0.5726	0.8623	0.6847	1.4141	1.1291	0.9446	1.0079	1.0588	2.2278	0.7206	1.3696	1.1278	1.0603	0.9921	0.7136	2.113	0.4188
9722	TAG56:8-FA18:2	Triacylglycerol	TAG Ester	53411	GC-FID	100009559		0.4593	0.7283	3.4578	0.8856	1.9796	1.7105	0.9426	1.513	0.9429	12.1421	0.6798	1.0172	0.6427	2.5892	1.3242	2.0246	0.9828	1.2647	1.4801	0.5957	3.6775	0.7637	1.0385	0.9044	1.0918	3.2013	0.3881
9731	TAG56:8-FA22:6	Triacylglycerol	TAG Ester	53412	GC-FID	100009560		0.3303	0.6402	5.2841	0.7009	2.0301	2.4743	1.1511	1.2171	1.0118	8.7989	1.0127	1.1108	0.2798	3.4108	1.0983	1.6493	0.7056	0.9882	0.7884	0.6054	5.4812	0.3533	0.5239	0.51	1.6482	3.4141	0.2812
9862	TAG57:9-FA22:6	Triacylglycerol	TAG Ester	53413	GC-FID	100009561		0.899	1.0468	1.0116	1.0425	1.0169	0.9707	0.9827	1.0089	1.0378	1.1904	1.0065	1.0024	0.9206	0.9586	0.9962	1.0244	1.008	1.048	0.9766	1.0206	1.0232	0.9164	0.9168	1	1	0.9651	0.9501
9884	TAG58:10-FA20:4	Triacylglycerol	TAG Ester	53414	GC-FID	100009562		0.5041	0.8114	2.0465	0.8121	2.1699	0.836	1.0545	2.177	0.4028	21.6939	0.7049	0.9357	1.4609	2.4322	1.1369	1.7888	1.1659	1.3443	0.7314	0.3573	2.3392	1.1123	0.8431	0.7368	1.0975	2.2283	0.4449
9982	TAG58:6-FA22:4	Triacylglycerol	TAG Ester	53415	GC-FID	100009563		0.7287	1.6151	1.2214	0.9629	2.5103	0.8996	0.8699	1.1564	1.1062	7.033	1.1877	1.0256	0.7543	1.4112	1.2201	0.5066	1.2504	1.2868	0.9744	0.7533	1.4247	1.1847	0.9248	0.818	0.9424	1.5979	0.5831
9989	TAG58:7-FA18:0	Triacylglycerol	TAG Ester	53416	GC-FID	100009564		0.5133	1.0077	3.4264	0.9951	2.7197	1.7936	0.9562	1.2061	1.2794	10.6511	1.0049	0.8518	0.4373	3.2669	1.4876	1.2293	0.9214	1.4486	0.5602	0.7749	3.208	0.888	0.7155	0.7721	1.5743	2.5755	0.4776
10001	TAG58:7-FA22:5	Triacylglycerol	TAG Ester	53417	GC-FID	100009565		0.7031	1.4834	1.8331	0.8841	2.2218	1.2024	1.0334	0.9496	1.3499	7.9637	1.1372	1.1136	0.4972	2.0728	1.6222	0.9049	1.0217	1.1787	0.7374	0.8035	2.0383	0.7018	0.6577	0.5696	0.9783	1.7973	0.6355
10002	TAG58:7-FA22:6	Triacylglycerol	TAG Ester	53418	GC-FID	100009566		0.5504	1.3014	3.9249	0.6568	2.3208	1.5318	1.1234	0.9396	1.0053	11.2694	0.9982	1.0371	0.199	2.4445	1.4579	1.0018	0.6826	0.9554	0.4011	0.5776	3.1787	0.3	0.4666	0.441	1.2629	1.995	0.3755
10020	TAG58:8-FA22:6	Triacylglycerol	TAG Ester	53419	GC-FID	100009567		0.5978	1.2509	3.3452	0.7025	1.8387	1.4421	1.4114	1.0484	0.9401	9.1463	0.9516	1.1624	0.2583	2.4958	1.7452	1.2944	0.6349	0.8504	0.5752	0.5098	2.9165	0.245	0.3751	0.3517	1.1751	2.0557	0.3554
10035	TAG58:9-FA22:5	Triacylglycerol	TAG Ester	53420	GC-FID	100009568		0.4601	0.7625	2.5167	0.7944	2.1069	1.385	1.077	1.1952	0.9845	7.594	0.7614	1.0155	0.4826	2.8342	1.224	1.7607	1.0309	1.1334	1.2031	0.7065	2.8504	0.6941	0.7705	0.7062	0.9389	2.8559	0.4994
10147	TAG60:11-FA22:6	Triacylglycerol	TAG Ester	53421	GC-FID	100009569		0.5931	0.9555	5.9264	0.6387	2.3476	1.8731	1.7705	1.6716	0.7716	12.1922	0.9857	1.0143	0.5189	4.6156	1.4997	2.0044	0.7721	1.2718	0.6123	0.7155	4.6359	0.4053	0.4053	0.391	1.704	2.9665	0.4613
7925	CE(14:0)	Cholesterol Ester	CE Ester	53452	GC-FID	100009600		0.6462	0.5813	1.2775	0.7815	0.8336	0.538	1.048	0.7525	2.3475	1.6024	1.1268	0.8581	0.9199	0.6213	0.5162	0.7699	1.2297	1.5681	0.7212	0.9913	1.7714	2.1206	1.0087	0.8887	1.3202	1.5256	0.7289
7926	CE(14:1)	Cholesterol Ester	CE Ester	53453	GC-FID	100009601		0.5659	0.4174	1.0086	0.7215	0.6805	0.5374	0.8122	1.0049	2.6755	1.0765	1.408	0.5986	0.7524	0.4362	0.4414	0.4567	1.1781	1.1886	0.5389	1.2109	1.0442	3.052	0.9404	0.9951	1.4162	1.0486	0.3292
7927	CE(15:0)	Cholesterol Ester	CE Ester	53454	GC-FID	100009602		0.9808	0.8162	0.9537	0.9384	0.5637	0.5461	1.3836	0.8116	2.5581	1.2075	0.9339	1.1038	1.2363	0.908	0.5544	0.8637	1.2484	1.8625	0.7497	0.8467	1.6188	2.0983	0.8642	0.7935	1.0215	1.4979	1.0192
8021	DAG(12:0/18:2)	Diacylglycerol	DAG Ester	53455	GC-FID	100009603		0.4864	0.4864	2.1263	0.9362	1.2419	0.4864	0.5584	1.2293	1.2293	4.7277	3.2028	0.4864	0.7922	0.6481	1.266	0.4864	0.921	0.4864	0.4864	0.801	1.7915	1.3746	1.199	0.9792	0.4864	0.6734	0.7543
8037	DAG(14:1/16:0)	Diacylglycerol	DAG Ester	53456	GC-FID	100009604		0.5962	1.0784	1.0451	0.8361	1.0665	2.848	2.943	1.5796	1.4727	2.2684	0.9905	0.6532	1.0523	1.4228	2.0641	0.8812	0.8622	0.9121	0.6983	0.9335	0.9572	1.6936	0.9311	1.0736	0.9192	1.0095	0.7767
8044	DAG(15:0/18:1)	Diacylglycerol	DAG Ester	53457	GC-FID	100009605		1.7531	1.1551	1.2709	1.0825	0.9222	0.907	1.3212	0.8075	1.9064	4.3452	1.0743	0.8543	0.7209	0.9526	1.2662	0.6893	0.8286	0.8859	0.7817	0.9748	1.0345	1.2522	1.2264	0.8953	1.0252	0.6261	0.5606
8060	DAG(16:0/20:4)	Diacylglycerol	DAG Ester	53458	GC-FID	100009606		0.5011	1.172	1.7211	0.6629	2.4571	0.8429	0.6497	1.2109	1.0577	15.8669	1.7274	0.8177	1.1474	1.4166	0.6503	0.3777	1.112	0.7834	0.5691	0.4874	1.7006	1.9263	0.8634	0.9423	0.9114	1.1611	0.3349
8072	DAG(16:1/22:6)	Diacylglycerol	DAG Ester	53459	GC-FID	100009607		0.3975	0.9524	2.9896	0.6128	1.9959	1.5445	1.0145	1.1097	0.8903	4.4969	1.354	0.9938	0.3975	1.3623	0.9358	1.0683	0.7495	1.0062	0.6625	0.7205	3.06	0.911	0.8199	0.3975	1.5528	1.1925	0.3975
8088	DAG(18:1/20:4)	Diacylglycerol	DAG Ester	53460	GC-FID	100009608		0.679	1.7704	1.5618	0.8976	3.0989	1.0077	0.8302	1.798	0.8495	11.985	1.1519	0.9923	1.0559	1.542	1.0297	0.5549	1.213	1.1744	0.9289	0.7105	1.6169	1.5609	0.853	0.777	0.8197	1.7759	0.4182
8092	DAG(18:1/22:6)	Diacylglycerol	DAG Ester	53461	GC-FID	100009609		0.4855	1.1318	4.3732	0.6477	2.4564	2.3617	1.2813	1.192	0.9479	8.7221	0.9939	1.1034	0.3692	2.1122	1.3225	1.0061	0.8999	1.0615	0.6112	0.7343	3.6565	0.4929	0.4348	0.3408	1.4652	2.2732	0.2265
8096	DAG(18:2/20:4)	Diacylglycerol	DAG Ester	53462	GC-FID	100009610		0.4811	0.892	2.2292	0.8936	2.5718	1.302	0.7262	1.9317	0.6483	12.4825	0.9136	0.8545	1.0487	1.9362	0.7698	0.9595	1.1028	1.2551	1.5637	0.6692	2.2397	1.5677	1.0405	1.063	0.7459	2.1309	0.2756
8099	DAG(18:2/22:5)	Diacylglycerol	DAG Ester	53463	GC-FID	100009611		0.3002	0.8967	2.9704	0.9856	1.9063	1.8199	0.6533	1.1049	1.2626	8.1577	1.0144	0.9327	0.542	2.1145	0.7214	1.1633	0.9039	1.193	1.0344	0.8423	3.4291	1.0745	0.7374	0.5797	1.048	2.6317	0.309
7970	DCER(18:0)	Sphingolipids	Dihydroceramide	53464	GC-FID	100009612		0.8097	0.8097	0.8097	0.8097	0.8097	0.8525	1	0.8097	0.8097	2.4531	1.1206	0.8097	0.8097	0.8097	0.8097	0.8097	0.8097	0.8097	0.8097	0.8847	0.8097	0.8097	0.8097	0.8097	1.3753	0.8097	0.9678
7974	DCER(22:0)	Sphingolipids	Dihydroceramide	53465	GC-FID	100009613		1.0491	0.9984	0.8512	0.8311	1.037	0.6549	1.0732	1.0225	1.5495	2.9091	0.8005	0.8705	0.8866	0.8351	0.8262	0.9163	1.671	0.8423	0.6621	1.3387	1.1271	1.2156	0.9903	0.9356	1.4481	1.6822	0.8383
7978	DCER(24:1)	Sphingolipids	Dihydroceramide	53466	GC-FID	100009614		0.9916	0.9508	0.9617	0.7904	1.0492	0.9493	1.2643	0.9624	1.7105	2.4309	1.0689	1.3897	1.0062	0.9902	1.2213	1.0733	1.4036	1.117	0.743	0.9807	0.9158	1.467	0.9253	1.1178	0.9508	1.1651	0.9559
7895	FFA(14:0)	Free Fatty Acids	Saturated FFA	53467	GC-FID	100009615		1.0699	0.8752	1.0363	0.7982	1.1009	1.3431	0.9982	1.1312	0.8434	0.8399	0.8858	1.0856	1.2461	0.9447	0.7791	0.9647	0.8807	1.1824	0.944	1.0979	1.0589	1.6568	0.9115	0.9853	1.0018	1.0532	1.2186
7898	FFA(17:0)	Free Fatty Acids	Saturated FFA	53468	GC-FID	100009616		0.8817	0.9815	0.9738	0.8547	1.1779	1.1916	0.9246	1.0371	0.8597	1.0358	0.903	0.8886	1.0185	2.9752	0.8761	1.072	0.9505	1.1335	0.9059	1.0765	1.3875	1.2699	0.9223	0.972	1.0236	1.0772	1.1731
7908	FFA(18:1)	Free Fatty Acids	Monounsaturated FFA	53469	GC-FID	100009617		0.5086	1.8837	0.2988	0.757	1.6763	2.0199	1.0015	0.944	0.4923	1.5424	0.6849	1.0642	1.3054	0.6566	0.7989	1.4082	0.8279	2.1538	0.7943	1.8778	1.1218	2.7225	0.9985	0.987	1.4602	1.4928	2.3723
7901	FFA(20:0)	Free Fatty Acids	Saturated FFA	53470	GC-FID	100009618		0.9787	1.0366	1.0164	1.0535	1.153	1.3213	1.3428	1.2228	0.9404	0.881	1.0008	0.8973	1.0101	0.9175	1.1353	0.9676	1.0062	0.9739	0.9324	0.987	0.966	0.9271	0.9209	1.0535	0.9106	0.9043	1.1783
7918	FFA(20:4)	Free Fatty Acids	Polyunsaturated FFA (PUFA)	53471	GC-FID	100009619		0.6366	1.0757	0.8424	0.7739	1.4759	1.3951	1.1048	1.0964	0.6547	1.0191	0.7473	0.8569	1.0429	0.9478	0.913	1.5025	1.1061	1.2702	0.9809	1.2268	1.2914	1.3467	0.9583	0.9201	0.9287	1.2034	1.3093
7910	FFA(22:1)	Free Fatty Acids	Monounsaturated FFA	53472	GC-FID	100009620		0.8657	1.0188	1.2118	1.0739	1.0753	0.9869	1.0152	0.8699	0.8537	0.7564	1.2861	1.0653	1.0219	0.7317	0.6905	1.1104	1.0238	0.8479	0.9417	1.1227	0.9463	1.06	0.837	1.0951	0.9554	1.0682	0.7901
7987	HCER(22:0)	Sphingolipids	Hexosylceramide	53473	GC-FID	100009621		1.4341	0.9697	0.8633	1.3147	0.5237	0.8093	1.3263	0.7285	1.4474	1.3624	0.8221	0.7829	1.0291	0.9105	0.4391	1.2897	1.3137	0.7619	1.184	0.8261	1.2142	1.5924	0.985	1.0135	1.3498	1.6537	0.9865
7988	HCER(22:1)	Sphingolipids	Hexosylceramide	53474	GC-FID	100009622		1.1374	1.0011	0.7178	1.3525	0.5644	0.541	0.9137	0.6858	1.3461	1.8083	0.8115	0.8371	0.9712	0.9244	0.5666	1.1203	1.3887	1.3482	0.4728	0.8839	1.0586	1.0927	1.131	1.1693	1.9148	1.2247	0.9925
7995	LCER(18:0)	Sphingolipids	Lactosylceramide	53475	GC-FID	100009623		1.0049	1.3318	0.7243	0.9033	0.7359	0.6886	1.2445	0.922	1.2748	1.4379	0.849	0.751	1.0797	0.9416	0.7314	1.1777	1.1724	1.0788	0.7938	0.8508	0.9042	1.1501	0.9577	0.9657	1.0539	1.1225	1.045
7996	LCER(18:1)	Sphingolipids	Lactosylceramide	53476	GC-FID	100009624		1.1155	1.1443	0.9156	1.0123	0.7901	0.9105	1.268	0.9551	1.2015	0.9821	1.043	1.0151	1.0249	0.7985	0.9291	1.1378	1.1053	1.1095	0.8371	0.9877	0.7674	1.142	0.8534	1.155	0.871	0.8255	0.9366
7997	LCER(20:0)	Sphingolipids	Lactosylceramide	53477	GC-FID	100009625		0.9467	1.256	0.6061	1.0261	0.6332	0.6082	1.0972	0.5664	1.1139	1.1411	0.8966	0.9154	0.5977	1.0428	0.7461	1.2059	0.9969	1.0094	0.7252	0.8589	0.8109	1.0052	1.1411	1.0867	1.0094	1.0993	0.8945
8002	LCER(24:1)	Sphingolipids	Lactosylceramide	53478	GC-FID	100009626		1.1381	1.2007	0.6135	0.9933	0.5034	0.5805	1.3122	1.0067	1.5837	0.84	0.4361	0.9444	1.0085	0.725	0.4149	1.4237	1.5795	1.0726	0.9235	1.1381	0.8471	0.9087	0.9306	0.7912	1.1232	1.0329	1.4549
6966	LPC(16:1)	Lysophosphatidylcholine	LPC Ester	53479	GC-FID	100009627		1.1094	0.794	0.7992	1.1179	1.0638	0.6228	0.8581	1.0534	1.0865	0.7633	1.1278	0.6426	1.0657	0.9559	1.4212	0.794	0.7094	0.6346	0.7061	1.0221	0.7472	1.5545	1.072	1.2093	1.0843	0.9779	0.8021
6973	LPC(20:0)	Lysophosphatidylcholine	LPC Ester	53480	GC-FID	100009628		1.0299	1.1837	0.9626	0.9783	0.9717	0.8541	0.8701	1.0017	0.9667	1.2982	0.6915	0.9739	1.2153	0.8888	1.0017	1.2532	1.0261	0.8472	0.8575	0.9242	1.0737	0.9936	0.9983	1.0124	1.0699	1.1722	0.8066
6977	LPC(20:4)	Lysophosphatidylcholine	LPC Ester	53481	GC-FID	100009629		1.004	1.3153	0.7503	1.1425	1.6015	0.6101	1.3952	1.204	0.6081	1.3611	0.891	0.6521	1.2954	1.6279	1.9817	0.6966	0.7881	1.0187	0.6881	0.8987	0.853	0.932	0.6067	0.6535	0.996	1.3092	1.3171
7225	LPE(18:0)	Lysophosphatidylethanolamine	LPE Ester	53484	GC-FID	100009632		0.7883	1.2245	0.9297	0.7193	1.1705	0.5547	0.843	1.1961	0.8659	1.5326	0.8544	0.7673	1.1948	0.8366	1.57	1.0314	0.9985	1.2632	0.8026	0.9673	1.3728	1.3496	1.0595	1.0015	0.8918	1.6243	0.9959
7234	LPE(20:4)	Lysophosphatidylethanolamine	LPE Ester	53485	GC-FID	100009633		0.9627	1.3173	0.7718	1.0585	1.1104	0.4619	1.2445	1.1269	0.6546	1.324	0.7933	0.755	1.4142	1.0434	1.709	0.7349	0.9021	1.5471	0.7779	1.138	0.6882	1.4359	0.7555	0.6142	0.941	1.0985	0.9323
7239	LPE(22:4)	Lysophosphatidylethanolamine	LPE Ester	53487	GC-FID	100009635		1.1425	0.9184	0.6058	0.6307	1.5021	0.3873	0.5615	1.4495	0.9156	1.5214	1.0152	0.769	2.1051	1.0567	0.9848	0.5422	1.0373	1.1784	0.6528	1.1397	0.9156	3.6487	0.8769	1.0539	1.1674	1.3582	0.9405
6784	PC(16:0/14:0)	Phosphatidylcholine	PC Ester	53490	GC-FID	100009638		0.842	0.6125	1.3836	0.688	0.909	0.5233	0.9246	0.8896	1.577	2.2106	1.4713	0.7516	1.2453	0.5354	0.6568	0.7513	1.1616	1.2988	0.5343	0.8361	1.2648	2.0601	1.3838	1.4586	0.9208	0.9295	1.0705
6787	PC(16:0/16:1)	Phosphatidylcholine	PC Ester	53491	GC-FID	100009639		0.5372	0.9213	0.7284	0.6812	1.455	0.5535	0.6581	1.4774	1.0075	2.0811	1.8565	0.7808	1.0459	0.7545	0.887	0.55	0.9925	1.1548	0.3953	1.0639	1.1428	3.6977	1.5683	1.6803	1.3184	0.9017	0.6607
6840	PC(18:1/20:1)	Phosphatidylcholine	PC Ester	53493	GC-FID	100009641		1.2863	0.9108	0.9108	0.9108	0.9108	0.9108	0.9108	0.9108	1.0766	0.9108	0.9108	0.9108	0.9108	0.9108	0.9108	0.9108	0.9108	0.9108	0.9108	0.9108	0.9108	0.9108	0.9108	0.9108	0.9108	0.9108	0.9108
6844	PC(18:1/20:5)	Phosphatidylcholine	PC Ester	53494	GC-FID	100009642		1.2118	1.4972	1.2711	1.133	0.6362	0.6273	1.1809	0.3487	0.6484	2.0993	0.7377	1.0838	0.5895	0.7368	1.9848	2.4375	1.0276	1.2297	0.3747	0.9973	0.9096	0.517	0.5209	0.6368	1.0027	1.2149	0.5388
6849	PC(18:1/22:6)	Phosphatidylcholine	PC Ester	53496	GC-FID	100009644		1.1156	0.9999	1.4456	1.4119	1.0001	0.8928	1.0049	0.5571	0.9518	0.8601	1.1143	1.6719	0.5676	1.1112	1.1728	1.3124	1.1264	0.9539	0.6274	0.9679	1.1634	0.4444	1.1697	0.8941	1.0558	1.5119	0.7023
6857	PC(18:2/20:3)	Phosphatidylcholine	PC Ester	53497	GC-FID	100009645		0.8699	0.9989	1.1405	0.9106	0.6952	0.7202	0.8738	0.9193	1.2974	0.9057	1.2653	1.0711	0.9664	0.4998	0.4362	1.3549	0.939	1.1355	1.0011	1.4487	0.7216	1.3902	1.3716	1.4286	1.1551	1.524	0.618
6863	PC(18:2/22:5)	Phosphatidylcholine	PC Ester	53498	GC-FID	100009646		0.7977	0.7977	0.7977	0.7977	0.7977	0.7977	0.7977	0.7977	0.7977	0.7977	0.7977	0.7977	1.7058	0.7977	1.1131	0.7977	1.3233	0.7977	0.7977	0.7977	0.7977	0.7977	1.4412	0.9434	1	0.9538	0.8055
7034	PE(16:0/18:2)	Phosphatidylethanolamine	PE Ester	53502	GC-FID	100009650		0.6205	1.4357	0.9631	0.6412	1.3449	0.5349	0.5749	1.0168	1.3786	3.0784	1.592	0.9663	1.1426	0.4436	0.958	1.1208	1.1028	0.9832	0.4079	0.5484	0.8984	1.6229	2.0258	1.3681	0.7654	1.5158	0.372
7104	PE(18:1/22:6)	Phosphatidylethanolamine	PE Ester	53509	GC-FID	100009657		0.7353	1.5319	1.5886	0.5676	2.0425	0.7041	0.8892	0.6858	0.8149	2.0984	1.1542	1.7365	0.495	1.4855	1.4709	0.9635	0.8191	1.1648	0.4287	0.5333	1.1973	0.4147	0.6603	0.6765	1.2476	1.9165	0.4639
7106	PE(18:2/16:1)	Phosphatidylethanolamine	PE Ester	53510	GC-FID	100009658		1.2657	0.4833	0.7163	1.1508	0.4833	0.4833	0.6854	0.6482	1.2446	1.5937	0.4833	0.5954	0.8879	0.6995	0.6183	1.6967	1.4707	1.3677	0.8903	0.8678	1.7146	1.6429	1.0513	0.7083	1.0344	1	1.1476
7143	PE(O-18:0/18:1)	Phosphatidylethanolamine	PE Ether	53513	GC-FID	100009661		0.9674	0.9694	0.6744	0.9688	1.2066	0.6744	0.7037	0.8551	0.8279	2.2365	1.2133	0.9462	0.99	0.7017	1.1688	1.0658	1.0625	1.4412	0.6744	0.6897	0.6744	1.4505	1.0432	0.7355	0.9369	1.194	1.0259
7176	PE(P-16:0/22:5)	Phosphatidylethanolamine	PE Plasmalogen	53521	GC-FID	100009669		1.1553	0.9604	0.7236	0.7306	1.0396	0.65	0.85	0.6799	1.1452	2.6155	0.9263	0.9568	1.1154	0.7609	0.778	0.8326	1.0771	1.4368	0.478	1.2733	0.9084	1.375	1.1756	1.229	1.8019	1.2109	1.2628
7182	PE(P-18:0/18:0)	Phosphatidylethanolamine	PE Plasmalogen	53522	GC-FID	100009670		1	1	1	1	1	1	1	1	1	1	1	1	1	1	1	1	1	1	1	1	1	1	1	1	1	1	1
7185	PE(P-18:0/18:3)	Phosphatidylethanolamine	PE Plasmalogen	53523	GC-FID	100009671		0.8108	0.8108	0.8108	0.8108	0.8108	0.8108	0.8108	0.8108	0.8108	0.8108	0.8108	0.8108	0.8108	0.8108	0.8108	0.8108	0.8108	0.8108	0.8108	0.8108	0.8108	0.8108	0.8108	0.8108	0.8108	0.8108	0.8108
7190	PE(P-18:0/20:4)	Phosphatidylethanolamine	PE Plasmalogen	53524	GC-FID	100009672		1.474	1.117	0.7306	1.0013	1.1651	0.9987	0.9216	0.8383	0.614	2.5023	0.9096	0.92	0.9026	0.85	0.5258	1.2467	1.8735	1.6333	0.7085	1.2788	1.1204	1.0087	0.9331	0.8183	1.4293	1.497	1.6491
7510	PI(16:0/22:5)	Phosphatidylinositol	PI Ester	53527	GC-FID	100009675		0.7757	0.7757	1.2584	0.7757	0.994	0.7757	0.7757	0.7757	0.7757	0.7757	0.7757	1.038	0.7757	0.7757	0.7757	0.7757	0.7757	0.7757	0.7757	1	0.9305	1.7296	0.806	1.1565	1.0759	1.1855	0.8623
7539	PI(18:0/20:2)	Phosphatidylinositol	PI Ester	53528	GC-FID	100009676		1.0809	0.5816	1.3173	0.8765	0.8285	1	0.6036	0.6424	2.2711	1.9433	1.5492	0.8189	0.8262	0.6781	0.5816	1.3269	0.9332	0.5816	0.9794	0.8944	0.5839	1.177	1.2007	0.9131	1.0764	1.4188	0.5816
7550	PI(18:1/18:2)	Phosphatidylinositol	PI Ester	53530	GC-FID	100009678		1.8865	0.6585	0.8569	1.1155	0.659	0.4629	0.8098	0.5528	1.0324	0.8877	0.5178	1.4306	1.0533	0.4899	0.5393	1.6398	0.9848	0.6627	1.3937	1.0503	0.5543	1.0152	1.825	1.4845	0.6212	1.0796	0.5658
8010	SM(20:1)	Sphingolipids	Sphingomyelin	53531	GC-FID	100009679		1.1651	0.8547	0.7306	0.9846	0.8947	0.8132	1.1106	0.6651	1.6461	1.4619	0.9182	1.1808	0.7868	0.6745	0.7193	1.3208	0.9458	1.3325	0.8618	0.865	0.8218	1.144	1.1315	1.0833	1.2662	1.2367	1.0165
8399	TAG38:0-FA12:0	Triacylglycerol	TAG Ester	53532	GC-FID	100009680		0.9435	0.8182	3.1769	2.3636	1.0147	0.6511	1.2998	0.9853	15.7666	3.0442	26.8329	0.5823	2.0197	0.5651	4.7518	0.4423	0.5651	0.5528	0.57	0.3907	1.7174	0.9115	3.0172	3.2924	0.3563	0.3489	0.9754
8428	TAG42:0-FA12:0	Triacylglycerol	TAG Ester	53533	GC-FID	100009681		0.6664	0.1871	5.0397	0.7769	1.0416	0.156	1	0.8384	19.5945	7.362	16.3034	0.1531	1.1399	0.1701	2.2391	0.1257	0.5293	0.2845	0.1257	0.2599	2.5974	2.5983	3.0633	3.0028	0.6323	0.2949	0.5558
8474	TAG44:0-FA18:0	Triacylglycerol	TAG Ester	53534	GC-FID	100009682		0.7651	1.0663	1.1162	0.7045	1.0093	1.2321	0.865	1.0866	1.5277	1.5044	0.8945	1.016	0.9553	0.8523	1.0549	0.8457	0.8933	0.6603	1.0305	0.8948	1.0423	0.9356	0.7923	1.0777	0.7448	0.8659	0.9907
8486	TAG44:2-FA12:0	Triacylglycerol	TAG Ester	53535	GC-FID	100009683		0.8522	0.1952	5.4099	0.8884	1.2219	0.3615	0.7257	1.2074	8.6787	8.4465	11.9864	0.2603	1.1116	0.4618	2.4826	0.2133	0.7501	0.7592	0.3949	0.3398	4.0922	1.9593	3.9394	3.3095	0.6516	0.7347	0.3841
8519	TAG45:1-FA15:0	Triacylglycerol	TAG Ester	53536	GC-FID	100009684		1.0022	0.3739	2.9522	0.3935	0.6761	0.3978	0.8283	1.0326	10.1696	6.463	3.7348	0.5739	0.7826	0.337	1.2848	0.263	1	0.6957	0.263	0.4109	1.5717	2.8674	2.587	2.4609	0.613	0.4522	0.3848
8523	TAG45:1-FA18:1	Triacylglycerol	TAG Ester	53537	GC-FID	100009685		1.2398	0.5579	2.9425	0.6161	0.99	0.2759	1.01	1.0713	10.1931	8.4107	2.9747	0.3356	0.4736	0.6284	1.3287	0.2789	0.849	0.8398	0.3356	0.5303	1.6031	1.7946	2.9517	3.1923	0.564	0.6253	0.5456
8537	TAG46:0-FA12:0	Triacylglycerol	TAG Ester	53538	GC-FID	100009686		0.8808	0.3423	3.0464	0.8425	1.531	0.2338	0.8464	1.1854	8.1968	9.9227	7.3316	0.2611	1.1192	0.3839	2.0792	0.113	0.6762	0.556	0.2429	0.3423	2.1039	2.2813	2.7515	2.4657	0.8405	0.5606	0.6067
8543	TAG46:0-FA18:0	Triacylglycerol	TAG Ester	53539	GC-FID	100009687		1.0295	0.4734	3.6279	0.8553	1.4838	0.3698	1.3032	0.9062	12.6823	11.2049	6.4873	0.2685	0.9705	0.3953	1.8455	0.1904	0.7477	0.6453	0.2593	0.4294	2.2807	2.0324	2.8061	2.7853	0.8258	0.6528	0.64
8551	TAG46:1-FA16:1	Triacylglycerol	TAG Ester	53540	GC-FID	100009688		0.4539	0.3654	2.4588	0.4722	2.1437	0.4402	0.4747	1.2605	3.701	13.8571	5.7152	0.5984	0.8657	0.7362	0.997	0.2093	1.0873	0.6545	0.245	0.5821	2.4669	4.2726	3.1154	2.809	1.8288	0.7982	0.2532
8623	TAG47:2-FA14:0	Triacylglycerol	TAG Ester	53541	GC-FID	100009689		0.6105	0.349	3.606	0.6097	0.7822	0.6604	0.6563	1.1107	5.4965	7.9281	1.9215	0.7454	0.6539	0.9922	0.7658	0.3702	1.0078	1.2276	0.6653	0.5517	2.8762	2.3956	2.756	2.2942	0.9023	1.02	0.3098
8661	TAG48:1-FA12:0	Triacylglycerol	TAG Ester	53542	GC-FID	100009690		1.2925	0.5008	2.3568	1.0605	1.4007	0.2946	0.6879	0.9764	4.4364	7.7975	5.1507	0.376	0.6826	0.3824	2.7535	0.1505	0.7995	0.6057	0.3824	0.4533	1.6398	1.2793	2.1878	2.0415	0.5861	0.6849	0.5359
8667	TAG48:1-FA16:1	Triacylglycerol	TAG Ester	53543	GC-FID	100009691		0.3422	0.7898	1.746	0.6599	2.9286	0.7442	0.4613	1.478	2.7104	16.6226	6.1107	0.8466	1.1005	0.833	1.0532	0.2235	1.0417	0.8713	0.2534	0.6023	2.1834	4.9962	3.0911	2.8003	2.1567	0.9583	0.3269
8700	TAG48:3-FA18:3	Triacylglycerol	TAG Ester	53544	GC-FID	100009692		0.4612	0.5207	1.8483	0.3656	1.7572	0.417	0.5055	0.8175	2.4456	10.9146	1.9144	0.6759	0.611	1.1225	1.0331	0.1915	1.2593	0.9555	0.4725	0.4212	1.7247	1.4977	2.456	2.2357	0.9416	1.4189	0.1858
8756	TAG49:1-FA16:1	Triacylglycerol	TAG Ester	53545	GC-FID	100009693		0.5823	0.5908	1.479	0.7391	1.4682	0.6545	0.6429	1.5559	3.632	11.6537	3.58	0.8067	0.8929	0.7694	0.8214	0.3043	1.0016	1.1196	0.3851	0.6211	2.1056	4.7415	2.9627	2.1863	1.354	1.1638	0.4061
8770	TAG49:2-FA16:1	Triacylglycerol	TAG Ester	53546	GC-FID	100009694		0.6978	0.6945	1.3866	0.9505	1.3681	0.8216	0.5953	1.5101	3.0224	7.6621	2.4359	1.1035	0.8108	0.9065	1.129	0.2391	0.9971	1.3586	0.5377	0.6755	1.9205	4.0157	2.2555	1.936	1.0029	1.005	0.5115
8781	TAG49:3-FA15:0	Triacylglycerol	TAG Ester	53547	GC-FID	100009695		0.481	0.4492	1.8181	0.9235	1.1475	0.8622	0.7651	1.314	2.9197	6.9877	1.2819	1.0874	0.6624	1.0855	0.8051	0.3645	1.0418	1.2696	0.8398	0.5568	2.0758	2.2987	2.6815	2.2629	0.8058	1.388	0.3394
8838	TAG50:1-FA20:1	Triacylglycerol	TAG Ester	53548	GC-FID	100009696		0.6387	0.577	2.662	0.5444	1.2269	0.5285	0.5677	0.8758	4.2988	10.1102	3.3697	0.8786	0.7899	0.5836	1.0943	0.2969	1.1662	0.9057	0.2988	0.7292	1.4771	1.5145	1.563	1.7302	1.2689	0.8441	0.2269
8842	TAG50:2-FA14:0	Triacylglycerol	TAG Ester	53549	GC-FID	100009697		0.764	1.2778	1.8271	0.8815	1.6068	0.7763	0.6672	0.9358	2.9953	8.8408	1.4194	1.2775	0.6447	0.8645	1.8572	0.3967	1.1739	1.0252	0.7867	0.8623	1.8677	1.2316	1.5672	1.4105	0.9748	1.4274	0.4107
8849	TAG50:2-FA18:1	Triacylglycerol	TAG Ester	53550	GC-FID	100009698		0.5416	1.1433	1.289	0.7812	1.6682	0.788	0.5127	0.9822	2.1956	8.1524	1.7801	1.0832	0.6362	0.7002	1.3305	0.265	1.0188	0.9455	0.5597	0.6743	1.5337	1.7906	1.5216	1.2832	1.0178	1.1959	0.3873
8692	TAG48:3-FA14:0	Triacylglycerol	TAG Ester	53551	GC-FID	100009699		0.4468	0.3972	2.2122	0.7399	1.4611	0.8968	0.5113	1.1073	2.2244	7.9871	1.7853	0.8714	0.6699	1.0295	1.0688	0.4488	0.9599	0.9759	1.0241	0.6047	2.702	1.7718	2.5278	2.2836	1.0463	1.3934	0.2045
8881	TAG50:4-FA18:3	Triacylglycerol	TAG Ester	53552	GC-FID	100009700		0.4773	0.7347	1.2195	0.7102	1.9113	0.6962	0.6074	0.9814	1.419	7.2777	1.079	1.0186	0.5422	1.2746	1.5322	0.3422	1.1305	1.1073	0.8558	0.5498	1.5344	1.5328	2.0818	2.1122	0.8426	1.6359	0.2229
8894	TAG50:5-FA18:1	Triacylglycerol	TAG Ester	53553	GC-FID	100009701		1.0692	0.8413	1.5113	0.7572	1.5793	0.6157	0.6164	1.3285	1.5679	8.0107	1.0019	1.1526	0.4581	1.278	2.1323	0.7036	1.0027	0.9981	0.8107	0.5912	1.2237	0.943	5.109	5.0057	0.6929	1.1465	0.231
8938	TAG51:0-FA18:0	Triacylglycerol	TAG Ester	53554	GC-FID	100009702		0.7351	0.8581	1.9176	0.7018	1.3649	0.5206	0.7737	0.9758	6.501	13.8064	2.2289	0.4748	0.6056	0.6965	0.7933	0.2269	1.0981	1.0634	0.2413	0.6841	1.7874	2.707	2.8685	2.4447	1.0235	0.9765	0.6167
8966	TAG51:2-FA18:1	Triacylglycerol	TAG Ester	53555	GC-FID	100009703		0.7002	1.2262	1.0656	0.8965	1.1057	0.6573	0.6568	0.9945	3.0173	6.5642	1.1672	1.1741	0.6669	0.7996	1.1763	0.251	1.0055	1.1646	0.4895	0.6534	1.3167	1.7462	1.3439	1.2001	0.704	1.0105	0.5216
8988	TAG51:4-FA15:0	Triacylglycerol	TAG Ester	53556	GC-FID	100009704		0.484	0.498	2.2744	0.9982	0.9053	1.0892	0.6105	1.1669	2.4754	6.5939	0.5618	1.0657	0.5644	1.5145	0.6899	0.8194	1.0018	1.1793	1.4982	0.6169	2.5962	1.1314	1.9578	1.7367	0.5861	1.9792	0.3198
8993	TAG51:4-FA18:2	Triacylglycerol	TAG Ester	53557	GC-FID	100009705		0.4209	0.4412	2.3098	1.0608	0.9848	1.2033	0.6163	1.2525	2.3596	5.854	0.6108	1.0152	0.5515	1.5529	0.7148	0.8944	0.9668	1.2208	1.5972	0.6216	2.6883	1.225	1.857	1.6936	0.6226	2.0308	0.3039
9044	TAG52:1-FA18:1	Triacylglycerol	TAG Ester	53558	GC-FID	100009706		0.5974	1.8044	1.0423	0.8834	1.955	0.7723	0.5343	1.0214	2.1596	10.1239	1.5341	0.9853	0.6272	0.642	1.3055	0.2836	0.9498	0.9385	0.3916	0.6776	1.2299	1.3805	1.3551	1.3612	1.0147	1.1743	0.5266
9047	TAG52:1-FA20:1	Triacylglycerol	TAG Ester	53559	GC-FID	100009707		0.5738	1.1	1.8893	0.8704	1.7467	0.8168	0.5071	1.0254	2.9985	10.548	3.3614	1.029	0.9221	0.7038	0.9746	0.2824	1.0271	0.7689	0.2824	0.7379	1.3541	1.701	1.4662	1.6368	1.3726	0.962	0.4247
9058	TAG52:2-FA16:1	Triacylglycerol	TAG Ester	53560	GC-FID	100009708		0.8564	1.5237	0.9889	1.0545	2.0892	0.9155	0.5595	1.1429	1.7637	7.8345	1.7146	1.2157	0.5309	0.8078	2.1319	0.3315	0.8657	0.951	0.6232	0.8654	1.2934	1.5728	1.5026	1.3682	1.0111	1.0733	0.4457
9079	TAG52:3-FA20:0	Triacylglycerol	TAG Ester	53561	GC-FID	100009709		0.4446	1.0119	1.4637	1.0374	1.6765	1.224	0.518	1.1185	1.8072	7.8315	0.8993	0.926	0.6232	1.0682	0.9816	0.6225	0.9924	1.0076	0.8713	0.6643	2.0176	1.067	1.6621	1.4587	0.8692	1.779	0.3741
9080	TAG52:3-FA20:1	Triacylglycerol	TAG Ester	53562	GC-FID	100009710		0.5859	0.775	2.0233	1.0228	1.3866	0.9446	0.4956	1.1304	2.2552	7.1942	1.2837	1.014	0.6269	0.9404	1.4276	0.68	0.986	1.0731	0.7867	0.6474	1.973	1.0158	1.5356	1.3684	0.9031	1.1761	0.2995
9099	TAG52:4-FA20:4	Triacylglycerol	TAG Ester	53563	GC-FID	100009711		0.2234	0.8942	2.2189	0.5536	2.4797	0.6923	0.4441	1.2758	1.0284	14.9044	2.5099	0.654	1.1356	1.9685	0.6715	0.2801	1.0122	0.865	0.3389	0.3857	1.9434	2.0246	1.4551	1.293	1.1744	1.5241	0.3174
9142	TAG52:7-FA16:0	Triacylglycerol	TAG Ester	53564	GC-FID	100009712		0.7173	0.9124	1.8239	0.7239	1.9544	0.4799	0.8037	1.1052	4.4429	13.8595	2.4842	0.6285	0.7239	0.8379	0.968	0.2763	1.032	0.9418	0.2089	0.5697	1.6948	2.4591	2.3399	2.1866	0.958	1.0686	0.4163
9227	TAG53:4-FA18:0	Triacylglycerol	TAG Ester	53565	GC-FID	100009713		0.9565	0.9949	0.9953	1.0744	1.0101	1.004	0.9903	1.0559	1.0179	1.2658	1.0026	1.0306	0.9543	0.9347	1.0059	1.0923	0.9093	1.1176	1.0616	0.9543	1.0694	0.9226	0.96	1.0263	0.9494	0.9964	1.0233
9260	TAG53:6-FA18:3	Triacylglycerol	TAG Ester	53566	GC-FID	100009714		0.9504	1.0013	0.9759	1.1108	1.0242	1.0417	0.9642	1.0654	1.065	1.2596	0.9446	1.0293	0.9987	0.99	1.0795	0.996	0.9852	1.0158	1.0375	0.9796	1.0269	0.951	1.0135	0.9787	1.057	1.0754	0.9798
9262	TAG53:6-FA20:4	Triacylglycerol	TAG Ester	53567	GC-FID	100009715		0.6224	0.6996	2.3526	0.8643	1.2169	0.7322	0.9439	1.6809	1.509	8.4536	0.9248	0.9471	0.9885	2.5388	0.7608	0.6224	1.1731	1.4302	1.0919	0.5165	2.343	1.6474	1.5472	1.4238	0.7147	1.9586	0.4839
9296	TAG54:1-FA18:1	Triacylglycerol	TAG Ester	53568	GC-FID	100009716		1.3665	2.0217	1.1013	1.8393	2.1239	0.5952	0.6432	0.9781	3.0864	13.4983	1.307	0.8115	0.559	0.5641	1.7128	0.3555	1.0002	0.8662	0.3918	0.8237	1.0875	1.0874	1.6896	1.5651	0.8994	0.9998	0.568
9334	TAG54:3-FA16:0	Triacylglycerol	TAG Ester	53569	GC-FID	100009717		0.449	1.0103	1.6694	0.7993	1.6903	1.0134	0.45	1.174	1.8128	7.2863	1.4166	0.9449	0.7147	0.9436	0.8807	0.4271	0.9897	1.0908	0.5988	0.8668	1.7384	1.3324	1.2618	1.1139	1.1066	1.3563	0.418
9351	TAG54:4-FA16:1	Triacylglycerol	TAG Ester	53570	GC-FID	100009718		0.531	0.8319	1.3045	0.9886	1.7304	0.8865	0.4388	1.0687	1.4586	4.2991	1.0511	1.1376	0.5549	1.0771	1.4015	0.4468	0.7623	0.8605	0.9113	1.0114	1.2918	1.2985	1.0949	1.0609	0.8429	1.135	0.2966
9363	TAG54:4-FA22:4	Triacylglycerol	TAG Ester	53571	GC-FID	100009719		0.2855	0.9818	2.0664	0.6713	2.3711	0.8441	0.556	1.2824	1.5082	14.4321	2.9889	0.824	1.0182	1.5821	0.6283	0.2997	1.1851	0.9393	0.382	0.5218	2.215	2.5172	1.3922	1.2678	1.3671	1.396	0.4454
9388	TAG54:6-FA16:0	Triacylglycerol	TAG Ester	53572	GC-FID	100009720		0.2861	0.7701	2.4183	0.687	1.8283	1.0726	0.5982	1.2362	0.929	8.9426	1.0099	0.7866	0.718	1.8083	1.0259	0.8244	0.9963	1.0924	0.7182	0.4711	2.2659	1.1317	1.3286	1.2251	1.0037	1.9855	0.2952
9411	TAG54:7-FA18:1	Triacylglycerol	TAG Ester	53573	GC-FID	100009721		0.9519	1.2136	1.6754	0.8483	2.0661	0.7279	0.7741	0.8536	1.402	8.8436	0.5965	1.2314	0.3425	1.5124	2.9374	1.0481	1.1693	1.2288	0.7757	0.5478	1.6481	0.6204	2.0042	1.8359	0.7919	2.0799	0.317
9417	TAG54:7-FA20:4	Triacylglycerol	TAG Ester	53574	GC-FID	100009722		0.554	0.7548	1.5261	1.007	2.2072	0.9494	0.6971	1.5823	0.7864	9.2826	0.8141	1.0674	0.9309	2.0982	1.2174	0.8087	0.993	1.2026	1.2356	0.5115	1.9046	1.4586	1.6234	1.4155	0.9681	2.2088	0.3625
9491	TAG55:3-FA18:2	Triacylglycerol	TAG Ester	53575	GC-FID	100009723		1.2279	0.8298	1.4425	0.9927	1.8729	0.6484	0.6372	1.2621	2.1936	13.4176	1.1912	0.7575	0.6088	1.1174	1.3883	0.9702	1.0073	0.9589	0.7936	0.6357	1.5027	0.8714	1.6254	1.466	0.6724	1.5853	0.3795
9552	TAG55:7-FA20:3	Triacylglycerol	TAG Ester	53576	GC-FID	100009724		0.9586	1.0755	0.9835	1.0827	0.9457	0.9881	0.9843	1.0096	1.0475	1.3338	1.0006	1.1511	0.8981	0.9786	0.9143	1.0081	0.9941	1.0834	1.0066	1.077	1.0418	0.9896	1.0399	0.9979	0.9968	1.041	1.0539
9620	TAG56:2-FA18:1	Triacylglycerol	TAG Ester	53577	GC-FID	100009725		1.7561	1.7273	1.0928	1.8259	1.6056	0.6876	0.83	1.0005	2.3614	8.7019	1.0752	0.976	0.906	0.7074	1.4185	0.6943	1.1303	0.9382	0.6379	0.878	0.9889	0.8515	1.1943	1.1298	0.9293	0.9995	0.7567
9636	TAG56:3-FA20:1	Triacylglycerol	TAG Ester	53578	GC-FID	100009726		1.6359	2.922	1.2	2.1788	2.0987	0.7043	0.6744	0.9256	2.4776	10.6412	1.2273	1.2093	0.5687	0.6427	2.9942	0.4982	1.3992	1.0397	0.6585	0.9603	0.8805	0.7732	1.2453	1.2912	0.7002	1.0842	0.52
9637	TAG56:3-FA20:2	Triacylglycerol	TAG Ester	53579	GC-FID	100009727		0.6962	1.6993	1.3592	0.9908	1.8626	0.841	0.6352	0.9858	1.5896	7.6944	1.2957	1.0092	0.6168	0.8269	1.5712	0.4436	1.1448	1.0893	0.727	0.9791	1.2828	1.2502	1.1257	1.297	0.9322	1.3007	0.5243
9652	TAG56:4-FA20:2	Triacylglycerol	TAG Ester	53580	GC-FID	100009728		0.7695	1.8617	1.0675	1.2772	1.9687	0.8814	0.6463	0.9091	1.617	5.6661	0.9546	1.0761	0.65	0.8802	1.755	0.5306	1.2357	1.0356	0.9673	0.9685	1.0315	1.0483	1.1155	1.0934	0.7928	1.3772	0.5219
9675	TAG56:5-FA22:5	Triacylglycerol	TAG Ester	53581	GC-FID	100009729		0.2912	1.4349	2.0843	0.7337	2.2897	1.0903	0.668	0.9916	1.3421	9.3101	1.2947	0.8246	0.6708	1.7279	1.0084	0.5953	1.0264	1.3604	0.3902	0.6388	2.3752	1.2163	0.8442	0.8311	1.3016	1.6753	0.5435
9695	TAG56:6-FA22:6	Triacylglycerol	TAG Ester	53582	GC-FID	100009730		0.4065	1.2222	5.0226	0.6441	2.5088	1.9417	1.1184	1.1189	1.3623	14.0734	1.4727	0.9928	0.3493	2.6854	1.264	0.9114	0.7857	1.0072	0.4298	0.6404	4.6244	0.5849	0.6255	0.6344	1.9473	2.4057	0.3882
9700	TAG56:7-FA16:1	Triacylglycerol	TAG Ester	53583	GC-FID	100009731		0.6416	1.035	1.8558	0.9768	1.9421	1.2489	0.7323	1.1202	1.0446	4.8713	0.9318	1.0232	0.5749	2.2987	2.0424	0.8673	0.7887	1.2526	0.951	0.7968	2.0498	1.0638	0.6814	0.7526	1.1674	1.7231	0.3842
9702	TAG56:7-FA18:1	Triacylglycerol	TAG Ester	53584	GC-FID	100009732		0.6478	1.2756	2.4045	0.8489	2.2619	1.2095	0.9421	1.2354	0.9776	9.822	0.7968	1.0772	0.6256	1.9611	1.6997	1.0224	1.0809	1.2472	0.9404	0.5699	2.3521	0.8893	0.8198	0.7916	1.123	1.9974	0.4236
9704	TAG56:7-FA18:3	Triacylglycerol	TAG Ester	53585	GC-FID	100009733		0.4778	1.0474	1.3493	0.7965	2.6193	0.868	0.7558	1.2253	0.9822	7.5428	0.5726	0.9754	0.5154	1.9922	1.4665	0.598	1.1859	1.3724	1.1588	0.6833	1.5024	1.0178	1.2723	1.123	0.8206	2.1508	0.3887
9784	TAG57:3-FA18:2	Triacylglycerol	TAG Ester	53586	GC-FID	100009734		0.5421	0.6378	4.38	0.7208	1.6539	1.7935	1.1645	1.5317	0.9809	14.2759	0.723	0.8829	0.6128	3.1373	1.2919	3.0692	0.8289	1.0841	1.2651	0.5711	4.5847	0.5807	0.774	0.72	1.0191	3.0213	0.383
9888	TAG58:10-FA22:6	Triacylglycerol	TAG Ester	53587	GC-FID	100009735		0.4395	0.6345	4.9128	0.6293	1.8392	2.0969	1.345	1.3171	0.734	11.4683	0.7152	1.1804	0.2495	3.775	1.5192	2.8706	0.7118	0.907	1.093	0.4859	4.6435	0.3094	0.438	0.5208	1.2029	3.21	0.2789
9955	TAG58:5-FA18:1	Triacylglycerol	TAG Ester	53588	GC-FID	100009736		0.8461	1.5051	1.0687	0.8082	2.59	0.7364	0.5711	0.9541	1.3326	8.934	1.1155	1.0042	0.6351	1.0827	1.1879	0.4481	1.1634	1.1289	0.6858	0.9168	1.3031	1.1294	1.0092	0.9073	0.9958	1.1767	0.6874
9969	TAG58:6-FA16:0	Triacylglycerol	TAG Ester	53589	GC-FID	100009737		0.2953	0.7419	1.8087	0.6234	1.8031	0.8187	0.421	1.074	1.6791	5.8143	1.3862	1.1749	0.6074	0.8868	0.6939	0.5698	0.9892	1.2125	0.3561	1.0108	2.4498	1.0164	1.2389	1.1717	1.8047	1.1132	0.7643
9983	TAG58:6-FA22:5	Triacylglycerol	TAG Ester	53590	GC-FID	100009738		0.6095	1.5481	2.0043	0.8462	2.6589	1.183	0.9102	0.9682	1.494	8.6499	1.2938	1.0013	0.5619	2.4399	1.5619	0.7264	0.9987	1.5176	0.5975	0.8909	2.2105	1.0176	0.7766	0.6413	1.2917	1.692	0.6259
9987	TAG58:7-FA16:0	Triacylglycerol	TAG Ester	53591	GC-FID	100009739		0.3133	0.6718	2.5641	0.6161	2.1969	0.956	0.4755	1.239	1.3944	5.3115	1.2427	1.1598	0.639	1.1461	0.6452	0.7059	1.1703	1.226	0.457	0.9579	2.4012	1.0483	0.987	1.013	1.7604	1.4279	0.4706
7935	CE(18:4)	Cholesterol Ester	CE Ester	53623	GC-FID	100009771		0.5582	1.221	1.3422	0.5609	1.0364	0.2919	0.8955	0.9081	0.7209	1.9632	0.8032	1.1847	0.6543	0.5521	0.777	0.942	1.4737	1.2873	0.4317	1.8266	1.1939	2.194	1.2014	0.9035	2.2271	1.8892	0.3925
7938	CE(20:2)	Cholesterol Ester	CE Ester	53624	GC-FID	100009772		0.9477	0.7591	0.9911	0.7724	0.6943	0.9006	1.1396	0.9001	1.3353	1.1192	1.33	1.2394	0.8393	0.6364	0.3715	1.0742	1.1454	0.8351	0.8031	1.1029	1.1991	1.6839	1.1358	1.0164	1.3884	1.5466	0.6172
7942	CE(22:0)	Cholesterol Ester	CE Ester	53625	GC-FID	100009773		1.1635	1.0618	0.9222	0.7948	0.6315	0.6728	1.4902	0.7132	1.235	1.8282	0.9029	0.9139	0.7484	0.7404	0.5363	1.4534	1.411	1.1246	0.7097	1.015	1.2091	1.0635	0.9233	1.2358	1.517	1.8628	0.8852
7954	CER(18:1)	Sphingolipids	Ceramide	53626	GC-FID	100009774		1.2143	0.4592	0.4592	0.602	0.4592	0.4592	1.0204	0.4592	1.1531	2.1837	0.4592	0.4592	0.8571	0.4592	0.4592	0.4592	0.6837	1.2041	0.4592	0.7959	0.4592	0.4592	0.7143	0.4592	1.1735	1.2245	0.4592
7957	CER(22:0)	Sphingolipids	Ceramide	53627	GC-FID	100009775		0.9416	1.2727	0.7838	1.0144	0.9872	0.9304	1.0789	0.7295	2.1791	3.6213	0.6472	0.7444	0.9323	0.7271	0.5852	1.3032	1.0789	1.084	0.8426	0.9996	1.4372	1.4909	1.0702	1.0004	1.4229	1.7618	0.6111
7960	CER(24:1)	Sphingolipids	Ceramide	53628	GC-FID	100009776		1.0101	1.3852	1.025	0.8406	0.8569	1.0765	0.9507	0.7096	2.2311	3.1288	0.7211	0.9043	0.9321	0.8396	1.0515	0.8462	1.1658	1.3863	0.7878	0.9527	1.1723	1.3793	1.0142	0.9061	1.3346	1.564	0.9899
8017	DAG(12:0/16:0)	Diacylglycerol	DAG Ester	53629	GC-FID	100009777		1.114	1.5197	1.1064	0.6192	0.6413	0.8811	0.8929	0.774	1.877	1.4914	1.2578	0.3511	0.8839	1.2287	0.7298	1.3711	1.6379	0.6925	0.9454	0.6766	1.2827	0.8521	0.9046	0.897	1.1389	0.6987	2.6669
8054	DAG(16:0/18:1)	Diacylglycerol	DAG Ester	53630	GC-FID	100009778		0.5754	1.5987	1.2318	0.8676	2.1069	0.89	0.5126	1.0081	2.0762	10.4824	1.8749	1.0022	0.8654	0.6658	1.0928	0.2572	0.9978	0.9132	0.4078	0.7275	1.4677	1.642	1.3788	1.3115	1.0862	1.187	0.3409
8064	DAG(16:1/16:1)	Diacylglycerol	DAG Ester	53631	GC-FID	100009779		0.7346	1.0768	1.3684	0.7654	1.2675	1.1184	0.7368	1.8728	1.6316	2.1206	1.8355	1.1053	0.9737	0.864	0.8662	0.6557	1.0044	0.9759	1.0526	0.8114	1.0154	2.1842	0.9671	1.3487	1.0044	0.9518	0.4518
8067	DAG(16:1/18:2)	Diacylglycerol	DAG Ester	53632	GC-FID	100009780		0.3725	0.774	1.6822	1.0475	1.9734	1.4011	0.5374	1.4307	1.3185	5.9258	1.4452	0.9468	0.8136	0.8154	0.9057	0.6364	0.9183	1.1961	1.1139	0.7343	2.4888	2.4266	1.8154	1.6902	0.9525	1.6425	0.34
8087	DAG(18:1/20:3)	Diacylglycerol	DAG Ester	53633	GC-FID	100009781		0.5663	2.3818	1.3065	0.8011	3.0595	0.8658	0.685	1.3743	1.1051	8.3626	1.0898	0.9979	1.0438	1.0021	0.9634	0.4511	1.2916	1.3065	0.9512	1.1905	1.4543	2.0153	0.875	0.6774	0.8819	1.6167	0.4852
7979	DCER(26:0)	Sphingolipids	Dihydroceramide	53634	GC-FID	100009782		0.9574	1.6093	0.7362	0.6728	1.0551	1.4366	1.1836	0.5927	1.0367	2.2529	1.4908	0.8614	0.7604	1.2679	3.374	1.1068	0.5217	1.5501	0.6052	1.4382	0.8139	1.0225	1.5301	1.0067	0.6686	0.7479	0.8865
7913	FFA(18:2)	Free Fatty Acids	Polyunsaturated FFA (PUFA)	53635	GC-FID	100009783		0.3114	0.7979	0.3243	0.5131	1.4206	1.9578	0.7852	1.082	0.3643	1.2477	0.5145	0.7105	1.1718	0.6421	0.5711	1.7687	0.7315	1.5224	0.9942	1.8547	1.3029	2.6324	1.0338	1.0058	1.0398	1.6622	1.3499
7915	FFA(18:4)	Free Fatty Acids	Polyunsaturated FFA (PUFA)	53636	GC-FID	100009784		1.0057	1.1016	1.0664	0.9664	1.2001	1.1117	1.0857	1.3921	0.9043	0.9937	1.0287	0.9074	0.9856	0.8668	1.1034	1.2897	1.2771	0.9263	0.9503	0.9705	0.9943	0.9634	1.0171	1.0762	0.9919	1.0346	0.9829
7921	FFA(22:4)	Free Fatty Acids	Polyunsaturated FFA (PUFA)	53637	GC-FID	100009785		0.9042	1.154	0.913	0.8321	1.1946	1.2421	0.9562	1.2376	0.724	0.8981	1.0451	0.8476	1.1822	0.9078	1.0082	1.1836	1.0149	1.0981	0.9957	1.2032	1.0603	1.2812	1.0043	0.9855	0.8943	0.9669	1.1178
7983	HCER(18:0)	Sphingolipids	Hexosylceramide	53638	GC-FID	100009786		1.0653	0.9433	1.0086	0.8247	0.5533	0.8522	1.0584	0.8694	1.2285	1.3814	0.6375	0.8024	0.7887	0.8058	0.4381	1.2663	1.2148	1.2509	1.7234	0.8436	1.1821	1.6254	0.9158	0.9914	1.1581	1.0137	1.4433
7985	HCER(20:0)	Sphingolipids	Hexosylceramide	53639	GC-FID	100009787		1.1945	0.9443	0.7725	1.1934	0.5552	0.5995	1.3754	0.5722	1.3584	1.4107	0.7577	0.818	0.9681	0.9989	0.5506	0.9022	1.2309	1.0296	1.0011	0.7679	0.9067	1.8089	0.9511	0.9408	1.4198	1.1706	1.2833
7999	LCER(22:0)	Sphingolipids	Lactosylceramide	53640	GC-FID	100009788		1.1398	1.3124	0.5641	1.0798	0.7678	0.7331	1.5876	0.8292	1.316	1.1044	0.9679	0.8646	0.8032	0.9693	0.4594	1.6215	1.0683	1.1398	0.8053	0.9108	0.887	1.2322	1.5385	1.4215	1.2597	1.2972	1.0307
8003	LCER(26:0)	Sphingolipids	Lactosylceramide	53641	GC-FID	100009789		1.3009	0.5664	0.5664	1.0442	0.7699	0.5664	0.5664	1.0708	1.3186	0.5664	1.2743	0.9204	1.2389	0.5664	0.9558	1.3274	1.2655	0.5664	0.5664	0.8673	0.8496	0.5664	0.5664	0.5664	0.9381	1.292	0.5664
8004	LCER(26:1)	Sphingolipids	Lactosylceramide	53642	GC-FID	100009790		0.6573	1.5869	0.6573	0.6573	0.6573	0.6573	1.1174	0.6573	1.615	0.6573	0.6573	0.9765	0.6573	0.6573	0.6573	1.0704	0.7418	0.6573	0.7793	0.6573	0.6573	0.6573	0.6573	0.6573	0.7042	1.0047	0.9953
6978	LPC(20:5)	Lysophosphatidylcholine	LPC Ester	53644	GC-FID	100009792		0.7234	1.3393	0.9616	0.6191	0.6191	0.6191	0.6191	0.6191	0.6191	1.2908	0.6191	0.6191	0.6191	1.1121	2.7045	1.0094	0.6191	0.6191	0.6191	0.9295	0.8793	0.6191	0.6191	0.6191	1.0141	1	0.6191
6984	LPC(22:6)	Lysophosphatidylcholine	LPC Ester	53645	GC-FID	100009793		1.3333	1.2448	1.1938	0.6988	1.181	0.8922	1.3868	1.9983	0.6243	0.9671	0.819	0.8768	1	1.7163	2.1267	0.8845	0.9101	0.9491	0.6243	0.9178	1.6269	0.6406	0.8421	0.6825	1.2358	1.9273	1.1831
7231	LPE(20:1)	Lysophosphatidylethanolamine	LPE Ester	53647	GC-FID	100009795		1.6371	1.3237	1.4763	0.7918	1.3113	0.5031	0.7835	1.0309	0.8495	1.0969	1.0021	0.8784	0.9856	1.4062	1.934	0.5155	0.8619	1.0268	0.5031	0.9979	0.5031	0.833	1.0309	0.9732	0.6639	1.1052	0.6557
7241	LPE(22:6)	Lysophosphatidylethanolamine	LPE Ester	53649	GC-FID	100009797		0.8017	1.1961	1.4937	0.6813	1.1179	0.7634	1.1814	1.5466	0.4883	1.097	0.7854	1.1218	0.9052	1.6512	1.8875	0.9862	0.7522	1.4121	0.652	1.0909	1.1044	0.8354	0.6143	0.6509	1.0138	1.703	0.9767
6782	PC(15:0/22:6)	Phosphatidylcholine	PC Ester	53654	GC-FID	100009802		0.7968	0.7968	0.927	0.7968	0.7968	0.7968	0.7968	0.7968	0.7968	0.7968	0.7968	1.1739	0.7968	0.7968	0.7968	0.7968	0.7968	0.7968	0.7968	0.7968	1.073	0.7968	0.7968	0.7968	0.7968	0.7968	0.7968
6786	PC(16:0/16:0)	Phosphatidylcholine	PC Ester	53655	GC-FID	100009803		0.8095	1.0315	1.1353	0.7401	0.8937	0.7424	0.9901	0.7773	1.1573	1.4708	1.1268	0.9472	1.0702	0.6501	0.6248	1.0448	1.0099	1.0642	0.6471	0.918	0.9284	1.3349	1.2223	1.3098	0.9435	1.1534	0.8505
6789	PC(16:0/18:1)	Phosphatidylcholine	PC Ester	53656	GC-FID	100009804		0.8844	1.5998	0.8628	0.7451	1.084	0.7432	0.8423	0.9075	1.2279	1.9543	1.133	0.9931	0.9814	0.777	0.8797	0.7546	1.0259	0.9937	0.6092	1.1755	1.0063	1.5084	1.0749	1.0141	1.1259	1.0907	0.9779
6793	PC(16:0/20:1)	Phosphatidylcholine	PC Ester	53657	GC-FID	100009805		0.9834	1.1533	1.5452	0.8102	0.9066	0.8585	0.6932	0.8817	1.1986	1.4034	0.9175	1.4846	0.7714	0.8615	0.5752	1.0011	0.9989	0.95	0.7789	1.0389	1.0914	1.0454	1.2061	0.9661	1.0944	1.0485	0.8655
6813	PC(17:0/22:6)	Phosphatidylcholine	PC Ester	53659	GC-FID	100009807		0.5222	1.04	0.96	0.5222	0.5222	0.5222	0.5222	0.7469	0.5222	0.5222	0.5222	0.8096	0.5222	1.0801	0.951	0.9396	0.5222	1.322	0.5222	0.5222	1.2851	0.5222	0.5222	0.5222	0.5222	1.7851	0.5222
6818	PC(18:0/18:0)	Phosphatidylcholine	PC Ester	53660	GC-FID	100009808		0.8981	1.0709	1.1412	0.8159	1.0716	0.7183	0.9026	0.9038	1.0652	1.3591	0.9262	0.9935	0.809	0.7898	0.6155	0.9252	0.9875	1.0065	0.7222	1.0778	1.092	1.4856	1.03	1.008	1.4699	1.3749	0.9055
6832	PC(18:0/22:5)	Phosphatidylcholine	PC Ester	53662	GC-FID	100009810		0.6	0.6573	1.1517	0.9762	1.0607	0.7651	0.6706	1.0256	0.8235	1.4028	1.2456	0.907	0.907	1.1652	0.8006	0.7416	1.2949	1.3713	0.4419	1.0107	1.6609	2.0921	1.4702	1.2154	1.419	1.7886	0.8061
6848	PC(18:1/22:5)	Phosphatidylcholine	PC Ester	53663	GC-FID	100009811		1.1615	0.7812	0.7805	1.2797	0.8688	0.6436	0.7178	0.8813	1.3036	0.9369	1.0455	1.1401	1.0987	0.8531	1.0878	0.7208	0.9969	1.1769	0.6777	1.3622	0.7898	1.1561	1.041	1.0031	1.4661	1.2456	0.8284
6859	PC(18:2/20:5)	Phosphatidylcholine	PC Ester	53665	GC-FID	100009813		1.0563	1.1658	1.0004	0.5894	0.5894	0.5894	0.7158	0.5894	0.7805	1.4953	0.9996	0.5894	0.5894	0.5894	1.1398	2.2111	0.7956	1.3372	0.5894	0.5894	0.7621	0.5894	0.838	0.9619	1.0268	0.9894	0.5894
7030	PE(16:0/16:1)	Phosphatidylethanolamine	PE Ester	53672	GC-FID	100009820		0.9225	0.9225	0.9225	0.9225	0.9225	0.9225	0.9225	0.9225	0.9225	0.9225	1.0775	0.9225	0.9225	0.9225	0.9225	0.9225	0.9225	0.9225	0.9225	0.9225	0.9225	0.9225	0.9225	0.9225	0.9225	0.9225	0.9225
7085	PE(18:0/22:4)	Phosphatidylethanolamine	PE Ester	53674	GC-FID	100009822		0.8077	0.9706	0.9635	0.6695	1.599	0.8477	0.6956	0.9434	1.1523	4.0833	1.978	1.1513	1.5126	0.908	0.47	0.5522	1.852	0.827	0.6109	1.0294	1.2194	2.7037	1.3815	1.7385	1.0945	1.2536	0.5468
7098	PE(18:1/20:5)	Phosphatidylethanolamine	PE Ester	53675	GC-FID	100009823		0.8349	0.8349	1.2858	0.8349	0.8349	0.8349	0.8349	0.8349	1	0.8349	0.8349	0.8349	0.8349	0.8349	0.8349	0.8349	0.8349	0.8349	0.8349	0.8349	0.8349	0.8349	0.8349	0.8349	0.8349	0.8349	0.8349
7177	PE(P-16:0/22:6)	Phosphatidylethanolamine	PE Plasmalogen	53679	GC-FID	100009827		1.2299	0.9853	0.9746	0.5903	1.3327	1.055	0.8647	1.1225	0.8053	2.0579	0.9883	0.8174	0.5173	1.0255	0.7167	1.207	1.2052	1.5185	0.6151	1.0117	1.5643	0.5018	0.9855	0.6404	1.6422	2.4351	1.1679
7194	PE(P-18:0/22:4)	Phosphatidylethanolamine	PE Plasmalogen	53680	GC-FID	100009828		1.0001	0.8666	0.8281	0.9018	0.6541	0.6123	1.1127	0.7655	1.1314	1.5731	0.7969	0.9954	1.3744	0.6207	0.4931	0.8614	1.4015	1.2081	0.8114	1.1436	0.7764	1.5008	1.4682	1.3358	1.1798	1.297	0.9871
7195	PE(P-18:0/22:5)	Phosphatidylethanolamine	PE Plasmalogen	53681	GC-FID	100009829		1.1964	1.1865	0.7588	0.8153	0.965	0.5954	0.8428	0.7796	1.079	3.2477	0.6557	1.0243	0.9246	0.8695	0.7332	1.0487	1.1556	1.4562	0.722	1.1434	0.9525	1.2802	1.0925	0.8755	1.9176	1.2418	1.317
7207	PE(P-18:1/20:3)	Phosphatidylethanolamine	PE Plasmalogen	53682	GC-FID	100009830		1.6548	1.0152	0.9601	0.7456	0.9962	0.9217	0.8547	0.7936	0.8689	1.4624	1.0524	0.8373	0.649	0.5205	0.5819	1.4462	1.3726	1.6238	0.591	1.6417	1.0038	1.2956	0.7413	0.9575	1.615	0.955	1.4712
7534	PI(18:0/18:1)	Phosphatidylinositol	PI Ester	53684	GC-FID	100009832		1.8041	0.9448	1.172	0.7504	0.7908	0.4531	0.7768	0.4531	1.2677	1.513	1.73	1.2856	0.9248	0.4775	0.5799	0.9204	1.3648	0.9969	1.0031	1.3147	0.7989	1.2876	1.0156	0.9505	0.9831	1.1485	0.8228
7544	PI(18:0/22:4)	Phosphatidylinositol	PI Ester	53685	GC-FID	100009833		0.74	0.74	0.987	0.74	0.74	0.74	0.74	0.74	0.8658	1.6487	1.3177	0.9167	0.74	0.74	0.74	0.74	0.74	0.74	0.74	0.74	0.74	1.1996	0.74	0.74	0.74	0.74	0.74
7566	PI(18:2/18:2)	Phosphatidylinositol	PI Ester	53686	GC-FID	100009834		0.7435	0.5192	0.8319	0.5192	0.5192	0.5192	0.5192	0.5192	0.5192	1.3856	0.5192	0.9093	1.0963	0.5192	0.5192	1.5771	0.5192	0.9277	1.0295	0.9705	0.5192	0.5192	2.8364	2.576	0.5192	1.3139	0.5192
8009	SM(20:0)	Sphingolipids	Sphingomyelin	53687	GC-FID	100009835		0.9986	1.0043	0.7746	0.7866	0.8938	0.763	0.8276	0.6915	1.432	2.1503	1.0014	0.9782	0.9584	0.7282	0.5841	1.1526	1.0446	1.177	0.6969	0.7911	0.9911	1.0187	1.2835	1.1859	1.0182	1.2973	0.7873
8407	TAG40:0-FA12:0	Triacylglycerol	TAG Ester	53688	GC-FID	100009836		0.3952	0.1337	2.7766	0.9629	0.5022	0.1327	0.5399	0.5854	10.9946	2.2358	19.5552	0.1327	1.3839	0.1327	3.6434	0.1327	0.1327	0.2209	0.1327	0.1476	1.2293	0.8539	1.6295	1.8068	0.1347	0.1327	0.5072
8410	TAG40:0-FA16:0	Triacylglycerol	TAG Ester	53689	GC-FID	100009837		0.619	0.107	2.863	0.556	1.2103	0.107	1	0.6916	12.3458	6.074	8.422	0.107	0.9011	0.2366	1.4498	0.107	0.2894	0.1626	0.107	0.1407	0.7883	1.9238	2.2469	2.2879	0.1832	0.107	0.2689
8432	TAG42:0-FA16:0	Triacylglycerol	TAG Ester	53690	GC-FID	100009838		0.8614	0.171	4.0441	0.5618	1.7833	0.2113	1.4435	1.1064	17.2986	10.2769	7.5643	0.1177	0.8936	0.2685	1.2825	0.1204	0.5776	0.3889	0.1001	0.2834	1.4489	2.4963	3.2265	2.9956	0.4721	0.2347	0.2842
8439	TAG42:1-FA16:1	Triacylglycerol	TAG Ester	53691	GC-FID	100009839		0.8942	0.4712	2.8423	0.4788	1.3404	0.5019	1.1058	1.2404	10.1558	5.8154	5.9231	0.4212	0.7154	0.5365	1.2346	0.3808	0.7442	0.725	0.3846	0.4385	1.7385	3.2962	3.2712	3.4288	0.7462	0.3885	0.4423
8441	TAG42:2-FA12:0	Triacylglycerol	TAG Ester	53692	GC-FID	100009840		0.4775	0.2277	4.123	1.4215	0.7438	0.2277	0.472	0.5051	4.3728	4.3489	31.9174	0.2277	1.168	0.2277	3.7741	0.2277	0.3214	0.4867	0.2277	0.3067	1.6437	0.8852	1.7245	1.6107	0.2277	0.3508	0.4224
8468	TAG44:0-FA12:0	Triacylglycerol	TAG Ester	53693	GC-FID	100009841		0.5459	0.2633	3.3005	0.6033	1.7316	0.2413	0.885	1.115	10.3022	10.1372	8.7145	0.1607	1.4184	0.2763	1.5402	0.1238	0.5974	0.3871	0.16	0.3069	1.9395	2.6988	2.6948	2.3278	0.8277	0.503	0.5097
8478	TAG44:1-FA14:0	Triacylglycerol	TAG Ester	53694	GC-FID	100009842		0.936	0.2605	4.1347	0.6067	1.2305	0.3121	0.854	1.1127	11.6754	9.9645	8.985	0.3685	0.9049	0.4442	2.6553	0.1515	0.85	0.6041	0.2828	0.4486	2.9766	2.6539	3.5031	2.8277	1.064	0.5269	0.4519
8484	TAG44:1-FA18:1	Triacylglycerol	TAG Ester	53695	GC-FID	100009843		1.0253	0.3798	2.9126	0.6831	1.2988	0.2494	1.0232	0.9768	9.1438	8.2092	4.755	0.2347	0.6402	0.3607	1.77	0.1883	0.7626	0.6802	0.2502	0.2984	1.3674	1.4617	2.7018	2.4797	0.4453	0.4377	0.3602
8547	TAG46:1-FA14:0	Triacylglycerol	TAG Ester	53696	GC-FID	100009844		0.6462	0.4078	3.139	0.4624	1.5131	0.4448	0.6131	0.952	6.2692	12.2526	4.1014	0.6686	0.7225	0.6701	1.0716	0.1989	1.048	0.7791	0.3259	0.5188	2.661	2.5961	2.6203	2.4317	1.3186	0.8784	0.2264
8606	TAG47:0-FA16:0	Triacylglycerol	TAG Ester	53697	GC-FID	100009845		0.6693	0.4137	2.8275	0.4692	1.3106	0.3414	1.0269	1.1307	9.6394	15.0632	3.7078	0.5256	0.9176	0.4705	0.5169	0.2435	0.9731	0.894	0.1427	0.5512	1.7704	4.0266	2.6735	2.8071	1.061	0.725	0.3914
8629	TAG47:2-FA18:1	Triacylglycerol	TAG Ester	53698	GC-FID	100009846		1.0353	0.5014	1.8124	0.6063	0.9786	0.3343	0.6732	1.0845	4.7604	6.0613	1.7762	0.7372	0.5497	0.6732	1.3008	0.2321	1.0214	0.9415	0.5432	0.5775	1.3231	1.6407	1.8254	1.961	0.662	0.7577	0.4002
8669	TAG48:1-FA18:0	Triacylglycerol	TAG Ester	53699	GC-FID	100009847		1.0104	0.6038	2.167	0.9896	1.4447	0.432	0.7153	1.1868	5.0398	8.5756	4.2938	0.4348	0.7475	0.5396	2.0846	0.1812	0.8626	0.7702	0.3724	0.5329	1.8814	1.9768	2.3804	2.2746	0.8851	0.6834	0.5529
8678	TAG48:2-FA14:1	Triacylglycerol	TAG Ester	53700	GC-FID	100009848		0.6987	0.8186	1.6628	0.6507	1.582	0.4843	0.6269	1.3453	3.4125	7.8655	2.1643	0.7066	0.7847	0.6244	0.9574	0.1692	1.0904	1.1246	0.4325	0.6917	1.2523	2.4967	2.3622	2.1805	0.9966	0.8369	0.2942
8683	TAG48:2-FA18:0	Triacylglycerol	TAG Ester	53701	GC-FID	100009849		0.904	0.4224	3.8282	1.0087	1.9791	0.387	0.6953	1.5004	4.5357	11.956	6.1776	0.387	0.9913	0.6209	2.6664	0.3372	0.9466	0.8578	0.6708	0.6332	2.7495	1.8823	3.6166	3.0628	0.769	0.9812	0.517
8704	TAG48:4-FA12:0	Triacylglycerol	TAG Ester	53702	GC-FID	100009850		0.7285	0.2843	4.2392	0.7414	1.5619	0.5885	0.5956	1.5596	2.5695	7.2975	4.8424	0.5799	0.7421	0.9979	2.695	0.6827	1.0012	0.8617	1.8228	0.5065	3.4625	0.9988	2.7292	2.4361	0.5174	1.6896	0.2859
8711	TAG48:4-FA18:3	Triacylglycerol	TAG Ester	53703	GC-FID	100009851		0.7945	0.4449	1.6365	0.5471	1.8745	0.4475	0.6829	1.0608	2.1691	7.408	2.5957	0.7065	0.6259	0.9796	2.343	0.2453	1.272	0.9828	0.9085	0.5224	1.7466	1.4805	2.6626	2.2886	0.7611	1.3292	0.2261
8744	TAG49:0-FA15:0	Triacylglycerol	TAG Ester	53704	GC-FID	100009852		0.9235	0.8301	2.3526	0.6765	1.0978	0.5576	0.8447	1.1766	7.4457	11.9593	2.2705	0.8167	0.8715	0.8447	0.8841	0.173	0.9676	1.0324	0.2611	0.6825	1.5993	2.6324	2.4234	1.9232	1.0451	0.9269	0.5362
8786	TAG49:3-FA18:2	Triacylglycerol	TAG Ester	53705	GC-FID	100009853		0.4958	0.4086	2.3156	0.8751	0.9887	0.8232	0.6483	1.2698	2.9554	5.4994	1.2254	0.932	0.6429	1.1439	0.8261	0.477	1.0458	1.2883	1.0944	0.6215	2.4481	2.1479	1.9966	1.6445	0.7133	1.406	0.2782
8818	TAG50:0-FA14:0	Triacylglycerol	TAG Ester	53706	GC-FID	100009854		1.0216	0.7862	2.0156	0.7592	1.4673	0.4799	0.8865	0.9784	6.9508	12.3778	2.2835	0.6204	0.5736	0.561	1.0565	0.3243	0.8559	0.7309	0.379	0.6456	1.7135	1.5532	2.2228	1.9021	1.0258	0.8949	0.5075
8857	TAG50:3-FA14:0	Triacylglycerol	TAG Ester	53707	GC-FID	100009855		0.508	0.6475	2.3307	0.7562	1.3203	0.903	0.524	0.9833	2.2544	6.9811	1.0377	1.0167	0.53	1.0618	1.1238	0.644	1.0761	0.8676	1.1826	0.6767	2.5842	1.0545	1.5234	1.317	0.7782	1.6406	0.2659
8863	TAG50:3-FA18:0	Triacylglycerol	TAG Ester	53708	GC-FID	100009856		0.7718	0.6407	1.588	0.5548	1.5329	0.6071	0.5586	1.0625	3.0261	9.4377	1.1265	0.6603	0.4825	0.8367	1.3117	0.3649	0.8287	1.0112	0.6771	0.5982	1.6477	1.2585	2.8367	2.5646	0.8189	1.1321	0.3094
8937	TAG51:0-FA17:0	Triacylglycerol	TAG Ester	53709	GC-FID	100009857		0.6915	0.8141	1.664	0.6094	1.3219	0.4476	0.6218	1.1391	4.4052	14.3193	1.9704	0.5836	0.7025	0.6485	0.8986	0.2133	0.9368	0.9845	0.2372	0.5865	1.6736	2.4973	2.1441	1.9924	1.1167	1.0155	0.5192
8948	TAG51:1-FA16:0	Triacylglycerol	TAG Ester	53710	GC-FID	100009858		0.5559	0.9423	1.4826	0.7025	1.4371	0.5882	0.5449	1.1305	3.2969	11.807	2.0649	0.7151	0.798	0.7796	0.9629	0.215	0.9926	1.1706	0.2945	0.5773	1.7282	2.4459	1.9732	1.825	1.0074	1.0626	0.5129
8976	TAG51:3-FA16:0	Triacylglycerol	TAG Ester	53711	GC-FID	100009859		0.9358	0.9824	1.1037	0.9968	1.0044	1.0237	0.8888	1.0989	1.1826	1.9968	0.9832	0.9692	1.0128	0.9671	1.0166	0.957	0.986	1.0349	0.9717	0.9638	1.2134	1.1886	1.1058	1.0586	1.0032	1.0566	0.9861
8982	TAG51:3-FA18:3	Triacylglycerol	TAG Ester	53712	GC-FID	100009860		0.5815	0.7886	1.2074	0.6197	1.5472	0.5584	0.5455	1.0644	2.4385	11.9442	0.984	0.8546	0.5747	1.398	0.999	0.2302	1.2026	1.4001	0.523	0.572	1.5758	1.7753	2.73	2.5611	0.826	1.6023	0.3316
8996	TAG51:4-FA20:4	Triacylglycerol	TAG Ester	53713	GC-FID	100009861		0.5167	0.6087	2.2779	0.5651	0.9991	0.5177	0.6283	0.9879	1.7444	8.8225	1.5474	0.6348	1.0493	1.3931	0.4665	0.3346	1.1236	1.0009	0.381	0.4433	1.658	1.8401	1.382	1.0883	0.75	1.0864	0.4823
9029	TAG52:0-FA16:0	Triacylglycerol	TAG Ester	53714	GC-FID	100009862		0.7048	1.3062	1.3441	0.9187	2.0853	0.5335	0.5219	1.0357	3.1263	15.2008	2.0998	0.5886	0.6654	0.5522	0.9643	0.2227	0.9003	0.7882	0.2451	0.6296	1.2697	1.6037	1.95	1.8432	1.1951	0.9468	0.4532
9043	TAG52:1-FA18:0	Triacylglycerol	TAG Ester	53715	GC-FID	100009863		0.6317	1.704	1.2541	0.9614	2.2147	0.6727	0.5243	1.1467	2.2993	12.7182	1.9054	0.7995	0.6854	0.6474	1.1994	0.2561	0.9452	0.8697	0.3258	0.6308	1.4073	1.6074	1.7408	1.5938	1.0386	1.1629	0.4679
9054	TAG52:2-FA14:0	Triacylglycerol	TAG Ester	53716	GC-FID	100009864		1.0317	0.9573	2.4906	0.9663	1.4667	0.7366	0.5586	0.9495	3.5553	8.345	1.8369	1.2803	0.6149	0.7489	1.7922	0.3534	1.2201	1.0686	0.5094	0.9631	1.6634	1.2013	1.4006	1.499	0.9521	0.9683	0.3877
9057	TAG52:2-FA16:0	Triacylglycerol	TAG Ester	53717	GC-FID	100009865		0.567	1.8043	1.108	0.9735	1.7478	0.9403	0.5636	0.9874	1.8349	6.9908	1.2463	1.1691	0.6592	0.7277	1.2996	0.3429	1.007	1.0184	0.522	0.738	1.2032	1.1506	1.2091	1.1417	0.993	1.2817	0.5391
9065	TAG52:2-FA20:1	Triacylglycerol	TAG Ester	53718	GC-FID	100009866		0.6605	0.9734	1.6087	0.9575	1.4752	0.8099	0.5513	1.0791	2.4379	6.8846	2.6663	1.0756	0.7031	0.7392	1.3859	0.3547	1.0746	1.0266	0.4496	0.847	1.4656	1.6238	1.3456	1.3141	1.0719	0.8743	0.3532
9083	TAG52:3-FA22:1	Triacylglycerol	TAG Ester	53719	GC-FID	100009867		0.3819	1.0983	1.5184	0.9455	1.7392	1.2967	0.5785	1.2976	1.8202	7.4411	0.939	1.1598	0.599	0.979	1.1896	0.5962	0.8971	1.021	0.8626	0.5403	1.7513	1.1337	1.5147	1.3582	0.8971	1.9469	0.4173
9112	TAG52:5-FA18:3	Triacylglycerol	TAG Ester	53720	GC-FID	100009868		0.407	0.7868	1.3151	0.8051	1.9989	0.9644	0.5448	1.0526	1.2463	7.678	0.6026	1.0268	0.4595	1.3849	1.2653	0.527	1.0885	1.1282	1.0893	0.5605	1.7007	0.9732	2.123	1.8646	0.8471	2.3235	0.2628
9117	TAG52:5-FA20:4	Triacylglycerol	TAG Ester	53721	GC-FID	100009869		0.4077	0.7782	2.0321	0.6314	2.4169	0.7419	0.622	1.6903	0.9569	9.5459	1.8741	0.7941	1.0135	1.9495	0.9865	0.333	1.19	1.1185	0.7737	0.4476	2.2028	2.3859	1.5248	1.2544	1.0704	1.6128	0.3274
9118	TAG52:5-FA20:5	Triacylglycerol	TAG Ester	53722	GC-FID	100009870		0.2857	1.0852	3.763	0.5895	2.0019	0.6889	0.4861	1.0441	1.073	19.6749	1.2488	0.6232	0.8205	1.9687	1.6515	1.0063	0.9798	0.9937	0.2943	0.4075	2.3146	1.4874	1.0687	0.9774	1.4501	1.6066	0.2747
9135	TAG52:6-FA20:5	Triacylglycerol	TAG Ester	53723	GC-FID	100009871		0.3159	0.9478	3.242	0.6014	1.9633	0.6859	0.6361	1.1856	0.9842	12.2436	1.0158	0.6406	0.6473	2.1376	2.397	1.1689	1.0557	1.2081	0.4393	0.4675	2.5491	1.7344	1.1789	0.9241	1.2587	1.8661	0.2917
9158	TAG52:8-FA18:2	Triacylglycerol	TAG Ester	53724	GC-FID	100009872		0.7101	0.6436	2.2268	0.7238	1.26	0.913	0.5942	1.2916	2.3282	10.9037	1.335	0.6718	0.6905	1.3538	0.9693	0.8568	1.0307	1.1287	0.8269	0.4919	2.5789	1.8201	3.0051	2.4254	0.8431	1.8167	0.4109
9185	TAG53:1-FA17:0	Triacylglycerol	TAG Ester	53725	GC-FID	100009873		0.9455	1.3861	1.1802	0.8553	1.2962	0.5963	0.659	0.9376	2.8913	10.4896	1.1685	0.7715	0.6416	0.8097	1.3378	0.2539	1.104	1.1261	0.4318	0.7296	1.49	1.5746	1.5841	1.5782	0.7158	1.0545	0.5641
9200	TAG53:2-FA18:0	Triacylglycerol	TAG Ester	53726	GC-FID	100009874		0.856	0.9965	1.1372	1.0035	1.1606	0.9463	0.7413	1.0449	1.6735	5.7841	1.0617	0.8407	0.7287	0.9799	1.1066	0.6799	0.9425	1.1147	0.7752	0.7809	1.4862	1.497	1.5312	1.4118	0.8225	1.1583	0.712
9202	TAG53:2-FA18:2	Triacylglycerol	TAG Ester	53727	GC-FID	100009875		0.732	0.7564	1.5928	0.9736	1.5531	0.9118	0.6734	1.2773	2.6762	10.2051	0.9957	0.8441	0.6468	1.4193	1.0914	0.5996	1.0043	1.2789	0.7871	0.6005	2.4038	1.4979	2.1575	1.8152	0.7903	1.7361	0.456
9214	TAG53:3-FA18:0	Triacylglycerol	TAG Ester	53728	GC-FID	100009876		1.0031	0.9975	0.942	1.0218	1.0084	1.0263	0.9969	1.0448	0.9962	1.2289	0.9719	1.0312	0.9971	1.0388	1.0745	1.0828	0.965	1.0955	0.9601	1.0025	1.0192	0.9323	0.9658	0.9781	1.0503	0.9614	1.0542
9230	TAG53:4-FA18:3	Triacylglycerol	TAG Ester	53729	GC-FID	100009877		0.6977	1.1174	1.1192	0.7275	1.6263	0.6758	0.6501	1.0545	1.8358	8.4383	0.6879	0.9145	0.5441	1.5032	1.4831	0.3491	1.1254	1.3245	0.799	0.5405	1.4837	1.2291	1.974	1.7749	0.682	1.891	0.436
9245	TAG53:5-FA18:3	Triacylglycerol	TAG Ester	53730	GC-FID	100009878		0.6242	0.855	1.0992	0.8006	1.4132	0.7951	0.7535	0.9944	1.5777	5.7204	0.6529	1.0056	0.5754	1.5984	1.5048	0.5745	1.1062	1.3256	1.0113	0.6782	1.5464	1.08	1.7023	1.6056	0.7251	1.8104	0.4882
9248	TAG53:5-FA20:4	Triacylglycerol	TAG Ester	53731	GC-FID	100009879		0.6153	0.7843	1.6765	0.7654	1.5533	0.6461	0.8636	1.5	1.5026	9.1585	1.2007	0.8904	1.0647	2.0489	0.9269	0.4151	1.1558	1.4129	0.6796	0.4639	1.8327	2.1932	1.2522	1.1356	0.761	1.5207	0.5453
9281	TAG54:0-FA16:0	Triacylglycerol	TAG Ester	53732	GC-FID	100009880		0.9971	0.729	3.0607	1.2601	1.5267	0.5246	0.6842	0.9834	4.4371	11.4104	1.3266	0.4227	0.6756	1.0462	0.8649	1.2522	0.6662	0.6048	0.31	0.5802	1.9942	0.6655	1.2558	1.2377	0.888	1.2912	0.4292
9318	TAG54:2-FA16:0	Triacylglycerol	TAG Ester	53733	GC-FID	100009881		0.7578	1.5045	1.2999	0.9504	1.632	0.717	0.4661	1.018	2.1402	8.4152	1.6742	1.0546	0.7173	0.5887	1.1223	0.2374	0.9203	1.0687	0.3416	0.7713	1.1301	1.0138	1.1263	0.9984	1.0394	1.0016	0.5142
9350	TAG54:4-FA16:0	Triacylglycerol	TAG Ester	53734	GC-FID	100009882		0.3175	1.0094	1.7257	0.6291	2.1295	0.9603	0.4476	1.3773	1.3406	7.115	1.3859	0.8814	0.7173	1.2494	0.8283	0.4891	1.0317	0.9906	0.7965	0.8444	1.8147	1.6459	1.2756	1.1024	1.1584	1.531	0.3536
9369	TAG54:5-FA16:1	Triacylglycerol	TAG Ester	53735	GC-FID	100009883		0.4813	0.7763	1.394	0.9005	2.2303	0.9425	0.4498	1.2966	1.0967	5.3138	1.3237	1.0007	0.6116	1.356	1.3333	0.5589	0.8766	0.9761	1.1925	0.9993	1.5805	1.6466	1.2369	1.1159	0.9578	1.3323	0.3471
9372	TAG54:5-FA18:1	Triacylglycerol	TAG Ester	53736	GC-FID	100009884		0.6685	1.1293	1.2531	1.0984	1.9841	1.0165	0.5607	0.9835	1.6145	8.0669	0.5485	1.0633	0.4135	1.2362	1.6845	0.939	0.948	0.9217	1.5778	0.651	1.568	0.6897	1.5045	1.3656	0.6136	1.8933	0.2957
9378	TAG54:5-FA20:3	Triacylglycerol	TAG Ester	53737	GC-FID	100009885		0.294	0.8136	1.8306	0.7163	2.1798	0.9203	0.4957	1.5169	1.1266	6.2932	0.9977	0.8301	0.7436	1.3972	0.7816	0.6137	1.0352	1.0292	1.14	0.8245	1.9082	1.6421	1.3733	1.1261	1.0023	1.9836	0.3384
9389	TAG54:6-FA16:1	Triacylglycerol	TAG Ester	53738	GC-FID	100009886		0.5059	0.77	1.6698	0.9359	2.0809	0.9054	0.6608	1.4468	0.8752	5.7605	1.0622	0.9617	0.7307	1.5911	1.3722	0.7402	0.8858	1.0514	1.2204	0.7486	1.6943	1.7106	1.2435	1.0793	1.0383	1.6626	0.3329
9394	TAG54:6-FA18:3	Triacylglycerol	TAG Ester	53739	GC-FID	100009887		0.6643	0.9745	1.0838	1.0255	2.0069	0.9682	0.646	0.8984	1.49	7.5969	0.4536	1.2988	0.367	1.4933	2.1425	0.78	1.0402	1.0983	1.4216	0.6296	1.408	0.6388	1.8828	1.6931	0.738	2.2484	0.2691
9429	TAG54:8-FA18:3	Triacylglycerol	TAG Ester	53740	GC-FID	100009888		0.5912	0.7306	1.0309	0.8027	2.0451	0.7424	0.7269	0.8678	0.9691	8.9478	0.3326	1.3042	0.3526	1.9854	2.5213	0.7511	1.0854	1.2142	1.2417	0.5281	1.3408	0.5994	2.472	2.0586	0.7524	2.7594	0.2136
9432	TAG54:8-FA20:4	Triacylglycerol	TAG Ester	53741	GC-FID	100009889		0.6002	0.7064	1.4146	0.7017	2.1127	0.645	0.9159	1.8637	0.5943	9.9422	0.7135	0.9914	1.0086	2.1942	1.4057	0.8303	1.1407	1.1632	1.0174	0.4267	1.6306	1.3579	1.6158	1.2741	0.8433	1.7067	0.3275
9478	TAG55:2-FA18:2	Triacylglycerol	TAG Ester	53742	GC-FID	100009890		0.6118	0.6729	2.9114	0.7903	1.6252	1.2084	0.904	1.2669	0.9065	12.9928	0.565	0.9144	0.6238	2.6985	1.7348	3.4876	0.9282	1.17	1.1102	0.5012	2.5437	0.7652	1.0243	0.9928	0.9455	2.5132	0.356
9563	TAG55:8-FA20:4	Triacylglycerol	TAG Ester	53743	GC-FID	100009891		0.8798	1.1305	0.9601	1.0591	1.042	1.0078	0.9514	1.0122	1.0565	1.568	0.9638	0.904	1.0478	0.9975	1.126	0.9741	1.052	0.9841	1.0283	0.9746	1.0992	0.8682	1.0122	0.9949	1.0025	0.9638	1.0167
9647	TAG56:4-FA18:1	Triacylglycerol	TAG Ester	53744	GC-FID	100009892		0.8052	1.5758	1.2216	1.0812	2.096	0.9313	0.6164	1.0567	1.6668	7.5199	0.983	1.0856	0.5335	0.8662	1.7679	0.49	1.1065	1.0466	0.8471	0.8789	1.1075	0.9932	1.0482	1.0068	0.7595	1.2092	0.452
9648	TAG56:4-FA18:2	Triacylglycerol	TAG Ester	53745	GC-FID	100009893		1.0006	1.2721	1.4495	1.2282	1.9265	0.8492	0.601	1.094	1.961	10.5514	0.8102	1.0172	0.4995	0.885	1.8145	0.7054	1.0117	0.9994	0.9634	0.6909	1.1514	0.7338	1.3327	1.2425	0.5888	1.3471	0.403
9653	TAG56:4-FA20:3	Triacylglycerol	TAG Ester	53746	GC-FID	100009894		0.5704	1.7334	1.3381	0.8617	2.6609	0.9389	0.6983	1.115	1.5636	7.89	1.194	1.1049	0.5857	1.1261	1.2164	0.5212	0.9901	1.2345	0.7891	0.9251	1.3098	1.2503	0.8648	0.8449	1.0099	1.4556	0.4625
9685	TAG56:6-FA18:3	Triacylglycerol	TAG Ester	53747	GC-FID	100009895		0.665	0.9882	1.2495	0.9425	2.1618	0.8699	0.6078	1.0434	1.3379	6.8177	0.5526	1.0118	0.5024	1.3777	1.8814	0.6853	1.0434	1.2894	1.1529	0.7604	1.3089	0.9073	1.3644	1.2836	0.8446	1.8507	0.3999
9699	TAG56:7-FA16:0	Triacylglycerol	TAG Ester	53748	GC-FID	100009896		0.3584	1.0846	3.5936	0.8722	2.3585	1.887	0.8899	1.2107	1.2728	9.5114	1.0092	0.9838	0.5099	2.7457	1.2255	1.1448	0.9908	1.4737	0.7853	0.6987	3.8688	0.9746	0.9001	0.7931	1.4623	2.6985	0.4472
9701	TAG56:7-FA18:0	Triacylglycerol	TAG Ester	53749	GC-FID	100009897		0.5369	0.9804	2.4418	0.8327	2.4015	1.1944	0.8486	1.1381	1.2953	10.1455	0.6681	0.8869	0.4312	2.3994	1.8486	1.4838	0.9161	1.5783	0.6617	0.5582	2.4737	0.7844	0.9968	0.8555	1.0935	2.4461	0.3792
9709	TAG56:7-FA20:4	Triacylglycerol	TAG Ester	53750	GC-FID	100009898		0.6695	1.0555	1.4081	0.9852	2.1911	0.8955	0.8589	1.4775	0.8192	10.4058	0.6064	1.0633	0.8776	1.5712	1.222	0.9116	1.2303	1.2607	1.3119	0.4807	1.3976	1.0084	1.0209	0.9916	0.7439	1.9115	0.49
9728	TAG56:8-FA20:5	Triacylglycerol	TAG Ester	53751	GC-FID	100009899		0.7416	1.5197	2.9104	0.9304	1.9361	0.8705	0.9952	1.4437	0.8002	17.1838	0.5628	0.8499	0.7524	2.4098	3.3588	3.7159	1.23	1.6137	0.9374	0.5465	2.2875	0.9227	0.9102	0.8756	1.0048	2.6348	0.3588
9887	TAG58:10-FA22:5	Triacylglycerol	TAG Ester	53752	GC-FID	100009900		0.5873	0.816	2.3087	0.7027	2.0988	1.236	0.9875	1.1674	0.947	7.1538	0.6871	1.0125	0.5353	3.1466	1.7859	1.7432	1.0541	1.1892	0.8888	0.7484	2.6965	0.6424	0.8067	0.7297	1.0551	2.8825	0.422
9919	TAG58:2-FA18:1	Triacylglycerol	TAG Ester	53753	GC-FID	100009901		3.3043	4.8505	1.3655	6.0809	2.5867	0.3173	0.3954	2.2694	5.9683	30.9574	1.0496	0.4967	0.6155	0.5846	1.6912	0.2575	0.9835	0.484	0.2462	0.5536	1.0616	0.4931	1.2677	1.3331	0.617	0.8653	0.2392
9972	TAG58:6-FA18:1	Triacylglycerol	TAG Ester	53754	GC-FID	100009902		0.7213	1.6943	1.2943	0.8755	2.4325	0.884	0.7697	1.0341	1.362	7.209	1.0301	1.0488	0.6169	1.5222	1.3949	0.5105	1.235	1.3213	0.7298	0.8127	1.4065	0.9699	0.8775	0.7865	1.1615	1.4609	0.6433
10009	TAG58:8-FA18:2	Triacylglycerol	TAG Ester	53755	GC-FID	100009903		0.5643	0.8238	2.6778	0.9632	1.9302	1.4624	0.9545	1.1926	1.1187	7.791	0.7864	1.0052	0.5161	2.5688	1.4651	1.5402	0.9948	1.4026	1.221	0.7168	2.7265	0.7306	0.7796	0.7376	1.0594	2.3835	0.4637
10019	TAG58:8-FA22:5	Triacylglycerol	TAG Ester	53756	GC-FID	100009904		0.6088	0.9292	2.151	0.8998	2.115	1.2855	1.0569	1.1592	1.1065	7.2914	0.9482	1.0518	0.5096	2.4497	1.2177	1.439	0.9464	1.1693	1.1966	0.8109	2.3912	0.7403	0.6204	0.5937	0.928	2.1083	0.5297
10132	TAG60:10-FA22:5	Triacylglycerol	TAG Ester	53757	GC-FID	100009905		0.6154	0.9978	2.3933	0.8819	2.7281	1.2947	1.1668	1.3521	0.9285	9.0141	1.1278	0.8992	0.8277	2.9794	1.2178	1.2687	1.0022	1.4561	0.7573	0.6251	2.8137	0.9707	0.5016	0.5666	1.2492	2.5558	0.6815
10133	TAG60:10-FA22:6	Triacylglycerol	TAG Ester	53758	GC-FID	100009906		0.3721	0.74	4.1815	0.5753	2.404	1.8593	1.4728	1.2065	0.6156	7.4271	1.0195	0.9805	0.3342	4.0379	1.3267	1.3261	0.6486	1.0322	0.6522	0.5717	3.9717	0.4364	0.3072	0.2549	1.4914	2.7532	0.3396
7941	CE(20:5)	Cholesterol Ester	CE Ester	53795	GC-FID	100009943		0.8829	0.9751	1.3275	0.7641	0.9152	0.7579	1.5072	0.7682	0.8877	2.4853	0.9081	1.1204	0.6588	1.0441	1.5549	1.0539	1.0111	1.5539	0.3733	0.907	2.1347	1.2184	0.7001	0.6548	1.842	2.9488	0.5236
7943	CE(22:1)	Cholesterol Ester	CE Ester	53796	GC-FID	100009944		1.1988	0.8831	1.3144	0.8159	0.5719	0.8679	0.9373	0.7707	1.661	1.9386	0.708	0.8952	0.9566	0.79	0.6023	1.1487	1.159	1.0864	1.0587	0.9893	1.584	1.0408	1.288	0.9207	1.3542	1.4317	0.7367
7946	CE(22:5)	Cholesterol Ester	CE Ester	53797	GC-FID	100009945		0.9675	0.9601	1.0409	0.8116	0.8366	0.8997	1.0407	0.8268	1.1418	1.2849	1.1629	1.2142	0.8088	1.009	0.5394	0.8915	1.4463	1.0646	0.5368	0.9949	2.1531	1.4668	1.0753	0.9965	1.1501	2.0836	1.0035
7962	CER(26:1)	Sphingolipids	Ceramide	53798	GC-FID	100009946		0.9813	0.6636	1.3925	0.8411	0.6636	1	0.6729	0.8972	1.7944	1.8131	0.6636	0.7944	0.8692	0.6636	0.972	0.785	1.3738	1.0187	0.8318	0.7103	1.4393	1.4019	1.0841	1.0093	0.8692	1.028	1.2523
8020	DAG(12:0/18:1)	Diacylglycerol	DAG Ester	53799	GC-FID	100009947		0.9225	0.5501	2.1172	0.9206	1.3025	0.7618	1.0095	1.5331	2.3686	5.5331	4.0775	0.6352	1.4386	0.5255	1.896	0.7618	1.0189	0.7883	0.6068	0.6938	1.7977	1.5974	1.4575	1.7845	0.8393	0.879	0.5236
8030	DAG(14:0/18:1)	Diacylglycerol	DAG Ester	53800	GC-FID	100009948		0.75	1.1319	1.6484	0.7541	1.3568	0.7741	0.8511	1.0724	2.0026	5.8296	1.6396	0.8008	1.1304	0.6899	1.3516	0.4492	0.9025	0.8994	0.595	0.6124	1.5975	1.8583	1.2418	1.4348	1.0488	0.9512	0.3932
8085	DAG(18:1/20:1)	Diacylglycerol	DAG Ester	53801	GC-FID	100009949		1.1535	1.8509	1.3658	1.3468	1.8964	0.9855	0.8364	1.0145	1.9899	6.3411	1.4605	1.1194	0.7618	0.9375	1.5856	0.6027	1.0587	1.0815	0.4283	1.1383	0.8402	0.9008	0.9665	0.8667	0.6406	1.0929	0.5167
8091	DAG(18:1/22:5)	Diacylglycerol	DAG Ester	53802	GC-FID	100009950		0.4627	1.3917	2.1414	0.855	2.1709	1.4332	0.7323	1.0517	1.2407	7.7617	1.1498	0.8604	0.5126	1.6324	0.9856	0.5939	1.0596	1.0144	0.6606	0.7413	2.0608	1.21	0.5325	0.657	1.2593	1.9513	0.4916
7968	DCER(14:0)	Sphingolipids	Dihydroceramide	53803	GC-FID	100009951		0.9778	0.9778	0.9778	0.9778	0.9778	0.9778	0.9778	0.9778	0.9778	0.9778	0.9778	0.9778	0.9778	0.9778	0.9778	0.9778	1.0222	0.9778	0.9778	0.9778	0.9778	0.9778	0.9778	0.9778	0.9778	0.9778	0.9778
7975	DCER(22:1)	Sphingolipids	Dihydroceramide	53804	GC-FID	100016011		0.7381	1.3423	1.1732	0.7464	0.9876	0.9505	1.3979	0.7381	1.0021	2.066	1.0804	0.7381	0.899	0.9464	1.2701	0.9876	0.7608	0.7381	0.8701	0.7381	0.7381	1.0371	1.1814	1.132	0.8619	0.7381	1.0144
7899	FFA(18:0)	Free Fatty Acids	Saturated FFA	53805	GC-FID	100009953		0.8487	1.0021	1.0382	0.9789	1.2131	0.9979	0.9344	1.0136	0.9058	0.8855	0.9163	0.9814	1.0455	0.8397	0.7269	1.0075	0.9521	0.906	0.8505	1.065	1.0853	1.0446	0.9223	1.0374	1.0064	1.1309	1.1376
7923	FFA(22:6)	Free Fatty Acids	Polyunsaturated FFA (PUFA)	53806	GC-FID	100009954		0.8079	0.9049	1.0241	0.8169	1.2014	1.4103	1.0216	1.1216	0.6995	0.8532	0.841	0.7907	0.9803	1.0144	0.9024	1.4163	1.0525	1.2063	0.9856	1.2308	1.371	0.9422	0.7978	0.8678	1.1113	1.3387	1.1211
7905	FFA(24:0)	Free Fatty Acids	Saturated FFA	53807	GC-FID	100009955		1.5698	0.8977	0.8629	1.4172	0.8202	1.2085	1.2729	1.0359	0.8778	1.4767	1.075	0.5648	0.7305	1.0672	0.5927	1.8977	1.1604	0.735	0.6059	1.0191	0.9445	0.7672	0.8305	0.942	1.2889	0.8834	1.4187
7981	HCER(14:0)	Sphingolipids	Hexosylceramide	53808	GC-FID	100009956		0.9052	1.0517	1	0.7241	0.5517	0.75	1.6552	0.6034	1.6897	0.5517	0.6466	1.1293	0.931	0.5948	0.5517	0.8879	1.6379	1.3103	0.8103	0.9224	1.6293	1.5603	0.681	1.931	1.1552	0.5517	1.0517
7982	HCER(16:0)	Sphingolipids	Hexosylceramide	53809	GC-FID	100009957		1.0333	0.9364	0.8505	0.9704	0.5133	0.7464	1.5484	0.8614	1.6375	1.2919	0.8109	0.9226	0.9963	0.8333	0.5438	1.1614	1.3052	1.0207	0.9845	0.9616	1.3787	2.0799	1.1018	1.1451	1.2728	1.3181	1.0037
7984	HCER(18:1)	Sphingolipids	Hexosylceramide	53810	GC-FID	100009958		1.3776	0.9161	0.7133	1.1608	0.979	0.7063	1.014	0.4965	1.3497	2.1888	1.1888	0.7622	1.0629	0.6853	0.7133	1.1399	1.6573	1.3916	0.9161	0.7692	0.9301	0.7902	1.0909	1.1399	1.4056	1.1818	1.3427
7991	HCER(26:0)	Sphingolipids	Hexosylceramide	53811	GC-FID	100009959		1.2134	1.1715	0.7448	0.9874	1.046	0.6862	0.9038	1.113	1.6569	1.5816	0.9958	0.8033	0.9874	0.9372	0.7448	0.9958	1.2636	1.205	0.8117	0.6444	1.2134	1.3724	1.3305	1.3054	1.0042	1.523	0.9289
7998	LCER(20:1)	Sphingolipids	Lactosylceramide	53812	GC-FID	100009960		1.1397	1.2812	0.8268	0.9832	0.9721	0.5885	1.1806	0.9162	1.7169	2.1304	1.0168	0.797	0.8231	0.6927	0.689	1.1806	1.2737	1.203	0.7374	0.9497	0.9497	1.2998	0.8492	1.0428	1.2439	1.1993	0.8678
6974	LPC(20:1)	Lysophosphatidylcholine	LPC Ester	53813	GC-FID	100009961		1.1875	0.9789	0.9903	1.0763	0.8624	0.6743	1.1266	1.0345	1.1024	0.6895	0.7365	1.2592	1.0435	1.0097	1.4692	1.0516	1.1414	0.8762	0.8967	0.9138	0.7964	0.9717	0.6904	0.6073	0.9342	1.0905	0.9727
6982	LPC(22:4)	Lysophosphatidylcholine	LPC Ester	53815	GC-FID	100009963		0.5045	1.1451	0.5045	0.5045	1.1907	0.5045	0.5045	1.3651	0.6218	1.15	0.8989	0.5045	1.2486	1.1043	0.9943	0.5045	0.8916	1.0057	0.8712	0.8362	0.5045	1.3822	0.5045	0.5045	0.9715	0.5045	0.5045
7227	LPE(18:2)	Lysophosphatidylethanolamine	LPE Ester	53817	GC-FID	100009965		1.7533	1.0729	0.6898	0.8989	0.9951	0.2975	0.807	1.6357	1.0049	0.8546	0.7455	0.385	1.8957	0.6612	1.4838	0.9426	0.666	1.1445	0.5794	1.2085	0.5135	1.2729	1.4204	1.2768	1.0178	0.8979	0.6893
7232	LPE(20:2)	Lysophosphatidylethanolamine	LPE Ester	53818	GC-FID	100009966		0.8497	1	1.0829	1.0777	1.2176	0.7617	0.8964	1.3109	0.9534	0.9534	0.8187	0.7617	1.3161	1.5648	2.1969	1.0777	0.8342	1.4352	0.9689	1.4508	0.8083	1.3264	0.829	1.1036	0.8446	1.114	0.8964
6764	PC(14:0/20:3)	Phosphatidylcholine	PC Ester	53823	GC-FID	100009971		0.7827	0.448	1.6341	0.5643	0.8043	0.4982	0.8282	0.8787	1.0308	1.1991	1.7147	1.4494	0.5462	0.448	0.4562	0.8735	1.0193	1.2205	1	1.1063	1.1525	1.3978	1.0793	0.7858	1.2766	1.1666	0.6462
6791	PC(16:0/18:3)	Phosphatidylcholine	PC Ester	53825	GC-FID	100009973		1.1021	1.5407	0.5581	0.5165	1.0176	0.5543	0.7761	0.9824	0.8983	1.9688	0.7729	1.1727	0.9304	0.5176	0.956	0.3948	1.4295	1.4269	0.3961	1.1013	0.6627	1.336	2.6077	2.8245	1.0593	1.1015	0.7115
6809	PC(17:0/20:4)	Phosphatidylcholine	PC Ester	53826	GC-FID	100009974		0.6734	1.1221	1.064	1.1448	1.0116	0.8578	1.3842	0.6864	0.9108	2.0213	0.7767	0.8624	0.7675	1.5788	0.6077	0.7545	1.1566	2.0797	0.9368	0.612	1.5367	1.2228	0.6179	0.5674	0.4801	1.2062	1.2303
6814	PC(18:0/12:0)	Phosphatidylcholine	PC Ester	53828	GC-FID	100009976		0.6686	0.6686	1.3428	0.6686	1.0677	0.6686	0.9371	0.6686	0.6686	1.544	0.9993	0.6686	0.6686	0.7081	0.8828	1.0339	0.8824	1.2413	0.6686	0.6686	1.0151	0.9847	0.6686	0.8307	0.6686	1	0.6686
6817	PC(18:0/16:1)	Phosphatidylcholine	PC Ester	53830	GC-FID	100009978		0.9572	0.9559	0.7478	0.896	1.1594	0.5712	0.636	1.5358	0.7526	1.6665	1.3866	0.9096	1.0608	0.938	1.0952	0.5939	1.0371	1.4777	0.5422	1.2404	1.1853	3.161	1.7766	1.8669	1.5395	0.8698	0.8256
6831	PC(18:0/22:4)	Phosphatidylcholine	PC Ester	53831	GC-FID	100009979		0.5078	0.619	0.841	0.8591	1.0218	0.6063	0.7517	1.1152	0.6622	1.4919	1.2575	0.7284	0.9811	0.7043	0.4509	0.5964	1.2818	0.899	0.7174	1.2585	1.3525	2.4668	1.1661	1.0738	1.3122	1.0189	1.1637
6836	PC(18:1/18:1)	Phosphatidylcholine	PC Ester	53832	GC-FID	100009980		2.1342	1.9937	0.6452	1.0692	0.8876	0.5	0.8742	0.7222	1.1144	1.2836	0.9371	1.1077	0.8591	0.8112	1.0712	0.846	1.0443	1.0548	0.7547	1.1436	0.6592	0.8867	0.9576	0.9838	1.0162	1.0508	0.8849
6837	PC(18:1/18:2)	Phosphatidylcholine	PC Ester	53833	GC-FID	100009981		1.89	1.0408	0.7108	1.1294	0.6966	0.5044	0.8579	0.5817	1.2141	1.1771	0.7689	0.8392	0.9664	0.585	0.6687	1.2737	1.048	1.1524	0.8173	0.9005	0.7266	0.6686	1.2096	1.108	1.0847	1.0336	0.821
6847	PC(18:1/22:4)	Phosphatidylcholine	PC Ester	53834	GC-FID	100009982		0.7252	0.7252	0.7252	0.7252	0.7252	0.8379	0.7252	0.7252	0.7252	1.1932	0.7252	1.0628	1.3458	0.8207	0.7252	0.7252	0.7252	0.7252	0.8942	1.0694	0.7252	1.3653	0.9372	0.872	0.7252	0.7252	1.0633
6853	PC(18:2/18:3)	Phosphatidylcholine	PC Ester	53835	GC-FID	100009983		1.5262	0.8838	0.705	0.7136	0.883	0.7805	0.8494	0.7749	1.2976	1.3708	0.7726	1.0533	0.9377	0.8484	1	1.1072	1.1088	1.5919	0.8621	1.2416	0.8905	0.831	2.9072	2.2716	0.705	1.2979	0.9879
6856	PC(18:2/20:2)	Phosphatidylcholine	PC Ester	53836	GC-FID	100009984		1.2278	0.6791	1.1503	0.901	0.8673	0.816	0.9139	1.0109	1.231	0.941	1.0974	0.8736	0.8205	0.6629	0.8164	2.0033	0.8256	0.9149	1.2643	1.4348	1.1673	0.9891	1.437	1.66	1.054	1.4536	0.8415
7026	PE(16:0/14:0)	Phosphatidylethanolamine	PE Ester	53844	GC-FID	100009992		1	1	1	1	1	1	1	1	1	1	1	1	1	1	1	1	1	1	1	1	1	1	1	1	1	1	1
7046	PE(16:0/22:6)	Phosphatidylethanolamine	PE Ester	53845	GC-FID	100009993		0.2494	2.0226	1.9114	0.4733	2.4642	0.8588	0.6899	1.1582	0.7324	2.6816	1.7569	1.496	0.4034	1.067	1.623	0.8265	1.0269	1.596	0.4694	0.482	1.6768	0.5642	0.6142	0.4649	0.8431	2.4945	0.4298
7076	PE(18:0/18:3)	Phosphatidylethanolamine	PE Ester	53847	GC-FID	100009995		0.5151	1.3592	0.5151	0.5151	1.5075	0.5151	0.6717	0.8303	0.5151	2.4826	0.586	0.6864	0.5151	0.5151	0.5151	0.5151	0.9381	1	0.5151	0.5151	0.5151	0.5151	3.6094	4.7546	0.5151	0.9338	0.5151
7126	PE(O-16:0/18:2)	Phosphatidylethanolamine	PE Ether	53850	GC-FID	100009998		1.0822	0.4776	0.4776	0.7301	0.8832	0.9024	0.643	0.4776	0.4776	1.225	0.4776	0.7071	0.5952	0.4776	0.4776	1.1244	1.19	1.2111	0.8722	1.0554	0.4776	1.032	0.968	0.9114	1.2307	1.0513	1.3238
7136	PE(O-16:0/22:4)	Phosphatidylethanolamine	PE Ether	53852	GC-FID	100010000		0.634	0.8367	0.634	0.634	0.634	0.634	0.8823	0.634	0.634	0.634	1.095	0.8911	1.1822	0.634	0.634	0.634	1.1008	1.0186	0.634	1.03	0.634	1.4229	0.634	0.9803	1.4152	0.7523	1
7166	PE(P-16:0/18:3)	Phosphatidylethanolamine	PE Plasmalogen	53854	GC-FID	100010002		1	1	1	1	1	1	1	1	1	1	1	1	1	1	1	1	1	1	1	1	1	1	1	1	1	1	1
7170	PE(P-16:0/20:3)	Phosphatidylethanolamine	PE Plasmalogen	53855	GC-FID	100010003		1.7655	0.8775	0.6612	0.7701	1.0605	0.7517	0.6755	0.787	0.8325	1.0001	1.1858	0.8266	0.7089	0.3609	0.5042	1.2991	1.1881	1.587	0.635	1.5632	0.9999	1.5925	0.8961	0.8682	2.0971	1.265	1.135
7208	PE(P-18:1/20:4)	Phosphatidylethanolamine	PE Plasmalogen	53859	GC-FID	100010007		1.7025	1.1504	0.6428	0.9749	1.1741	1.0587	1.0939	0.6351	0.5487	2.2814	0.9781	1.0233	0.8072	0.7873	0.7494	1.3816	1.8957	1.7047	0.658	1.3814	1.0219	0.7988	0.875	0.885	1.4198	1.1999	1.8098
7504	PI(16:0/20:3)	Phosphatidylinositol	PI Ester	53860	GC-FID	100010008		0.8443	0.8215	1.2561	0.6939	0.8561	0.6173	0.4972	0.962	2.2531	0.9856	1.3418	1.1962	0.7519	0.4341	0.3245	1.2892	0.9402	0.9112	1.1277	1.4899	1.0428	3.4257	1.7666	1.7152	1.0144	1.1852	0.5475
7505	PI(16:0/20:4)	Phosphatidylinositol	PI Ester	53861	GC-FID	100010009		0.586	1.0074	1.377	0.7525	1.0408	0.6565	0.7145	0.8141	1.2971	1.7543	0.9669	1.1824	1.2015	0.5931	0.5283	0.7679	1.3359	0.8281	0.7842	1.1818	1.2123	2.5972	1.7959	1.8279	0.8893	1.2482	0.698
8008	SM(18:1)	Sphingolipids	Sphingomyelin	53862	GC-FID	100010010		1.1991	1.0976	0.9499	0.9694	0.9649	0.9422	1.1582	0.7567	1.7907	1.8944	1.0658	0.9008	0.8927	0.7077	0.7524	1.2885	0.9778	1.4323	0.8475	0.8444	0.945	1.2393	1.1713	1.1672	1.2514	1.329	1.2186
8013	SM(24:0)	Sphingolipids	Sphingomyelin	53863	GC-FID	100010011		1.1249	0.9426	0.8622	0.8202	0.8699	0.8828	1.1889	1.0031	1.4897	1.3281	1.0257	1.1629	0.9969	0.7869	0.7461	1.3734	1.3902	0.9575	0.9003	0.8979	1.1894	1.188	1.1416	1.0821	1.3088	1.5542	0.9309
8481	TAG44:1-FA16:0	Triacylglycerol	TAG Ester	53864	GC-FID	100010012		0.9526	0.3942	3.2666	0.5755	1.8495	0.2179	1.0474	1.4262	9.1452	11.1255	4.5553	0.2213	0.7951	0.4895	1.1816	0.1247	0.875	0.7248	0.1315	0.3489	1.5743	3.0941	3.9687	3.3556	0.7936	0.4079	0.2432
8511	TAG45:0-FA15:0	Triacylglycerol	TAG Ester	53865	GC-FID	100010013		1.1261	0.2913	4.9457	0.4652	0.887	0.3826	1.2913	0.9522	21.0239	11.7217	3.6261	0.5674	0.7087	0.4283	0.6283	0.3543	1.3043	0.7913	0.2196	0.6783	1.8152	3.6609	3.5239	3.3283	1.0478	0.6348	0.5891
8545	TAG46:1-FA12:0	Triacylglycerol	TAG Ester	53866	GC-FID	100010014		0.686	0.4161	2.7863	0.783	1.4652	0.3088	0.6258	1.1297	4.7527	9.8496	7.3258	0.3641	1.1374	0.4034	2.4101	0.108	0.79	0.6054	0.2655	0.3743	2.573	2.4529	2.6732	2.4954	0.8703	0.7786	0.4793
8564	TAG46:2-FA16:1	Triacylglycerol	TAG Ester	53867	GC-FID	100010015		0.8094	0.4102	2.2132	0.7398	1.6726	0.5287	0.621	1.5886	3.38	7.8131	6.2776	0.675	0.9893	0.7248	2.3717	0.2749	0.8977	0.7975	0.5901	0.6124	2.4469	3.8119	2.9994	2.8702	1.3326	0.9911	0.3735
8567	TAG46:2-FA18:2	Triacylglycerol	TAG Ester	53868	GC-FID	100010016		0.5026	0.2612	4.1251	0.6509	1.3042	0.4112	0.6183	1.2746	4.0883	8.5646	5.3571	0.394	0.9406	0.6639	1.5154	0.2664	0.8801	0.6178	0.5163	0.423	3.1513	1.633	2.6915	2.4285	0.7662	1.0594	0.2577
8586	TAG46:4-FA18:2	Triacylglycerol	TAG Ester	53869	GC-FID	100010017		1.0543	0.2559	3.6371	0.6221	2.4732	0.3495	0.6714	1.9206	4.7375	17.3855	1.4406	0.2926	0.4732	0.9457	1.0727	0.4732	0.8361	0.7684	0.7057	0.3144	1.2977	1.1781	4.1012	3.8696	0.4114	0.8846	0.1773
8607	TAG47:0-FA17:0	Triacylglycerol	TAG Ester	53870	GC-FID	100010018		0.869	0.7916	2.2449	0.9066	1.2363	0.5424	1.3383	0.9033	6.5618	9.9667	2.7057	0.8851	0.768	0.7884	0.7573	0.5285	1.1128	0.9398	0.7068	0.6004	1.8872	2.9366	2.1772	1.8711	1.0602	0.8421	0.5575
8612	TAG47:1-FA14:0	Triacylglycerol	TAG Ester	53871	GC-FID	100010019		0.8977	0.5412	3.1673	0.7018	0.9642	0.5729	0.865	1.2286	9.5519	11.5831	2.8864	0.9279	0.8384	0.8501	0.8399	0.2015	1.3954	1.1217	0.3453	0.6189	2.5647	3.3514	2.8373	2.3739	1.0066	0.9934	0.4542
8617	TAG47:1-FA17:0	Triacylglycerol	TAG Ester	53872	GC-FID	100010020		0.8183	0.4517	1.9209	0.7376	1.0068	0.3772	0.7802	1.1924	5.0555	6.0015	3.0357	0.5065	1.0114	0.6464	1.3521	0.4365	0.7316	0.9932	0.4897	0.4989	1.7369	2.6266	2.2418	1.9787	0.7042	0.6555	0.5719
8708	TAG48:4-FA16:1	Triacylglycerol	TAG Ester	53873	GC-FID	100010021		0.5479	0.4697	1.7512	0.8377	1.4262	0.7292	0.6075	1.2322	2.0655	6.0601	1.5943	0.9668	0.6168	1.108	1.3226	0.4101	0.9834	0.9541	1.0855	0.6383	1.7302	1.7664	2.9961	2.848	1.0166	1.1427	0.1838
8714	TAG48:4-FA20:4	Triacylglycerol	TAG Ester	53874	GC-FID	100010022		0.4186	0.3506	3.8022	0.4895	1.3347	0.2717	0.6044	1.3177	2.1888	9.5425	4.6424	0.2398	1.0549	1.1578	1.3996	0.1668	0.7942	0.5504	0.4016	0.2458	2.0559	1.3297	1.3626	1.2587	0.5305	0.7572	0.3167
8722	TAG48:5-FA18:3	Triacylglycerol	TAG Ester	53875	GC-FID	100010023		0.7007	0.3539	2.0235	0.4788	1.3207	0.3304	0.5287	1.1074	1.8659	7.3471	3.1602	0.4431	0.5637	0.8684	2.5787	0.2911	1.0382	0.7463	1.2123	0.4595	2.0335	0.9147	3.208	2.6308	0.5202	1.2672	0.1798
8755	TAG49:1-FA16:0	Triacylglycerol	TAG Ester	53876	GC-FID	100010024		0.6579	0.8152	1.728	0.6653	1.2116	0.5991	0.6255	0.965	4.2313	11.2383	2.4432	0.8313	0.8643	0.6615	0.7344	0.2032	1.09	1.107	0.2795	0.5645	1.7079	2.8352	2.0234	1.8232	0.9891	1.0109	0.4946
8768	TAG49:2-FA15:0	Triacylglycerol	TAG Ester	53877	GC-FID	100010025		0.496	0.593	2.1079	0.86	1.0612	0.7643	0.6151	1.2147	3.4865	8.9298	1.6176	0.9275	0.7842	0.9719	0.6983	0.3325	1.1259	1.2933	0.5578	0.5367	2.1807	2.4635	2.3471	1.8415	0.8821	1.3159	0.3991
8822	TAG50:0-FA18:0	Triacylglycerol	TAG Ester	53878	GC-FID	100010026		0.4955	1.0502	1.8222	0.688	2.5758	0.5896	0.6109	1.1764	4.4079	19.1143	4.0082	0.5433	0.8504	0.6526	0.7621	0.2003	0.8391	0.7629	0.192	0.5366	1.6327	2.3218	2.4535	2.118	1.4816	0.9498	0.3563
8831	TAG50:1-FA16:0	Triacylglycerol	TAG Ester	53879	GC-FID	100010027		0.3823	1.2843	1.3494	0.7373	2.0662	0.8091	0.4624	1.0713	2.5308	12.3711	2.6443	0.9127	0.9248	0.7416	0.9258	0.2151	0.991	0.8318	0.242	0.5677	1.4817	2.0664	1.7699	1.5711	1.3705	1.1704	0.3948
8835	TAG50:1-FA18:1	Triacylglycerol	TAG Ester	53880	GC-FID	100010028		0.4133	1.384	1.3895	0.7529	2.033	0.804	0.4866	1.036	2.7221	13.3856	2.5527	0.9966	0.9437	0.7432	0.9807	0.2087	1.0034	0.8518	0.2768	0.575	1.4688	1.9303	1.6153	1.4745	1.3684	1.2089	0.3899
8846	TAG50:2-FA16:1	Triacylglycerol	TAG Ester	53881	GC-FID	100010029		0.3852	1.0145	1.1154	0.8203	2.0015	0.9492	0.4536	1.1883	1.6751	8.1973	2.3381	1.0204	0.7455	0.7291	1.213	0.2421	0.9004	0.9855	0.4605	0.7106	1.5123	2.3433	1.7471	1.532	1.2795	1.1693	0.3897
8850	TAG50:2-FA18:2	Triacylglycerol	TAG Ester	53882	GC-FID	100010030		0.2807	0.8775	2.227	0.7698	2.1219	1.2356	0.4589	1.2541	2.4018	13.2224	1.873	0.9296	0.9307	1.1038	0.671	0.4631	1.0583	0.9417	0.5736	0.5935	2.4762	1.9676	2.2402	1.8409	1.3938	1.6753	0.3279
8693	TAG48:3-FA14:1	Triacylglycerol	TAG Ester	53883	GC-FID	100010031		0.602	0.4932	2.2016	0.8291	1.4663	0.7608	0.5985	1.6242	2.8399	7.1191	1.6142	0.7463	0.7478	0.8682	0.8627	0.3402	1.0554	1.1676	0.8099	0.7087	1.7663	2.437	3.1134	2.8375	0.9798	1.0727	0.2432
8695	TAG48:3-FA16:0	Triacylglycerol	TAG Ester	53884	GC-FID	100010032		0.4828	0.4134	2.141	0.6129	1.4964	0.6843	0.5634	1.2407	2.5522	8.9689	1.8202	0.6518	0.6837	0.9182	0.833	0.2536	1.1329	1.1319	0.6143	0.5567	1.8262	1.9962	3.0026	2.8468	1.0287	1.1968	0.2068
8861	TAG50:3-FA16:1	Triacylglycerol	TAG Ester	53885	GC-FID	100010033		0.3411	0.6189	1.3706	0.9765	1.8325	1.2324	0.4337	1.3983	1.5392	6.3414	1.6556	0.9929	0.6961	0.9149	1.0961	0.4249	0.8543	1.0071	0.803	0.6418	1.9828	2.3995	2.1039	1.8578	1.1218	1.4902	0.2866
8865	TAG50:3-FA18:2	Triacylglycerol	TAG Ester	53886	GC-FID	100010034		0.3577	0.6263	1.8287	0.8094	1.4791	1.1279	0.4831	1.1493	1.7661	6.4782	1.21	0.8469	0.6353	1.0052	0.9948	0.555	0.915	1.0061	1.034	0.6261	2.3367	1.6014	1.7226	1.5942	0.8768	1.5462	0.2749
8874	TAG50:4-FA14:1	Triacylglycerol	TAG Ester	53887	GC-FID	100010035		0.9353	0.8043	1.7206	0.9705	1.4135	0.7136	0.6855	1.3833	2.3442	6.2005	0.7728	1.0334	0.4962	1.1207	1.4783	0.6209	0.8082	0.9614	1.2789	0.8104	1.243	1.052	1.8708	1.6633	0.5597	1.0332	0.2263
8879	TAG50:4-FA18:1	Triacylglycerol	TAG Ester	53888	GC-FID	100010036		0.8798	0.7795	1.4729	0.8402	1.4263	0.6673	0.6845	0.9948	2.2293	7.2517	1.0435	1.0914	0.4463	1.128	1.9817	0.5004	0.947	1.0437	1.0052	0.6854	1.5161	1.0243	2.4106	2.2852	0.7803	1.3007	0.2582
8889	TAG50:5-FA14:1	Triacylglycerol	TAG Ester	53889	GC-FID	100010037		0.7942	0.5923	1.8807	0.9259	1.2861	0.8236	0.6676	1.4072	1.7637	6.3014	0.6823	1.0186	0.5001	1.3953	1.1585	0.9814	0.7369	0.9245	1.8128	0.7314	1.5054	1.0434	2.0124	2.0431	0.5744	1.2319	0.2464
8892	TAG50:5-FA16:1	Triacylglycerol	TAG Ester	53890	GC-FID	100010038		0.5364	0.7	1.1885	0.994	1.7544	0.802	0.538	1.3242	0.9214	4.8604	1.006	1.238	0.5543	1.3831	2.041	0.6037	0.843	1.0613	1.0518	0.6979	1.6114	1.644	2.3134	2.2177	0.964	1.3584	0.2256
8952	TAG51:1-FA18:1	Triacylglycerol	TAG Ester	53891	GC-FID	100010039		0.6527	1.0775	1.386	0.7015	1.1841	0.55	0.5844	0.983	3.4189	10.269	1.5463	0.8648	0.6879	0.7334	0.9947	0.2145	1.0348	1.1146	0.3363	0.6092	1.5998	2.158	1.6876	1.5797	0.9216	1.0713	0.5156
9031	TAG52:0-FA18:0	Triacylglycerol	TAG Ester	53892	GC-FID	100010040		0.6731	1.3909	1.4367	0.9132	2.0733	0.5717	0.5014	1.0265	3.1501	14.9218	2.1124	0.6156	0.5869	0.5273	0.9912	0.1937	0.8193	0.798	0.2552	0.6196	1.3246	1.6095	2.1914	1.9225	1.0927	0.9911	0.4764
9046	TAG52:1-FA20:0	Triacylglycerol	TAG Ester	53893	GC-FID	100010041		0.952	1.0222	0.9778	1.1686	1.2411	0.5871	0.8374	0.8744	3.17	7.1072	2.1617	0.77	0.7533	0.4286	1.4406	0.3834	1.1178	0.8942	0.3977	0.7681	1.0674	1.1755	1.1598	1.6176	0.7718	0.7986	0.5238
9061	TAG52:2-FA18:1	Triacylglycerol	TAG Ester	53894	GC-FID	100010042		0.6282	1.8597	1.051	0.9595	1.6598	0.902	0.6171	0.9854	1.8408	6.2616	1.3123	1.1982	0.6829	0.711	1.3869	0.3283	1.0146	1.0427	0.5251	0.7547	1.2203	1.1904	1.1343	1.1172	0.9813	1.2469	0.5762
9062	TAG52:2-FA18:2	Triacylglycerol	TAG Ester	53895	GC-FID	100010043		0.4498	1.116	1.6522	0.9393	1.9221	1.1527	0.5225	1.1972	1.9147	9.4981	1.1831	0.9381	0.6627	0.9698	0.9216	0.5626	0.9875	1.0824	0.7936	0.6935	1.9583	1.2727	1.7791	1.6798	1.0125	1.6949	0.4316
9073	TAG52:3-FA16:1	Triacylglycerol	TAG Ester	53896	GC-FID	100010044		0.8209	1.5915	0.9988	1.3433	1.9808	1.0012	0.6328	1.0558	1.8781	5.8483	1.2275	1.5852	0.5143	0.9487	2.4962	0.432	0.9403	0.9945	0.8718	0.8679	1.2671	1.3105	1.3312	1.1777	0.937	1.3554	0.446
9078	TAG52:3-FA18:3	Triacylglycerol	TAG Ester	53897	GC-FID	100010045		0.5297	1.2561	1.0711	0.6588	2.1332	0.7513	0.5172	0.9539	1.5724	10.2164	0.937	0.9325	0.5346	1.1302	1.2588	0.3542	1.1516	1.0719	0.6466	0.5416	1.4455	1.1209	2.1332	1.9304	1.0461	1.6807	0.336
9092	TAG52:4-FA18:1	Triacylglycerol	TAG Ester	53898	GC-FID	100010046		0.5471	1.0627	1.1299	1.0443	1.708	1.0192	0.5376	0.9699	1.4789	6.5966	0.7762	1.1839	0.4466	0.9808	1.7208	0.5606	0.8647	1.0269	1.0208	0.695	1.4298	0.9615	1.6734	1.5304	0.8398	1.4931	0.3122
9097	TAG52:4-FA20:2	Triacylglycerol	TAG Ester	53899	GC-FID	100010047		0.3955	0.5874	2.3585	0.8706	1.4463	1.0639	0.4854	1.1931	1.6007	5.1926	1.0873	0.8505	0.7512	1.2188	0.9782	0.7189	0.9516	1.0218	1.3901	0.8242	2.6398	1.3836	1.451	1.3705	0.9492	1.6307	0.2645
9098	TAG52:4-FA20:3	Triacylglycerol	TAG Ester	53900	GC-FID	100010048		0.3177	0.8377	1.818	0.7113	2.622	0.747	0.4927	1.6077	1.2967	7.0757	1.9205	0.8241	0.8553	1.179	0.9029	0.3924	1.1209	1.0592	0.9408	0.8658	2.0938	2.6872	1.4331	1.254	1.2376	1.4949	0.338
9103	TAG52:5-FA14:0	Triacylglycerol	TAG Ester	53901	GC-FID	100010049		0.431	0.5718	3.0911	0.5545	1.8063	0.6097	0.554	1.3235	1.4514	7.9421	1.4362	0.7658	0.6623	1.7321	1.0204	0.5385	1.2237	0.9572	1.1856	0.665	2.7432	1.441	1.4823	1.2494	0.9796	1.7054	0.2975
9116	TAG52:5-FA20:3	Triacylglycerol	TAG Ester	53902	GC-FID	100010050		0.3418	0.5928	2.6325	0.7281	2.1241	0.7523	0.588	1.5484	1.2525	5.649	1.1291	0.9039	0.7267	1.5559	0.9213	0.6346	1.1797	1.0787	1.8194	0.9043	2.7203	2.0704	1.5562	1.3406	0.8747	1.9293	0.2778
9234	TAG53:4-FA20:4	Triacylglycerol	TAG Ester	53903	GC-FID	100010051		0.3734	0.7662	1.6614	0.4582	1.2677	0.5134	0.4879	1.2737	1.3017	10.0577	1.4204	0.5821	1.0047	1.6046	0.6118	0.2817	1.0598	1.0327	0.336	0.4268	1.6385	2.0891	1.216	1.1964	0.7204	1.0912	0.5295
9258	TAG53:6-FA18:1	Triacylglycerol	TAG Ester	53904	GC-FID	100010052		0.9951	1.0146	0.9781	1.0561	1.0118	0.979	0.9689	0.982	1.0337	1.1191	1.0184	0.969	0.9495	1.0046	1.0012	1.0405	0.9712	1.0127	1.0433	1.0053	1.0192	0.9111	0.9988	0.9283	1.0483	0.9886	1.0234
9325	TAG54:2-FA20:0	Triacylglycerol	TAG Ester	53905	GC-FID	100010053		0.6841	1.0645	0.9905	1.4599	1.5124	0.6765	0.7793	1.0533	1.8275	7.5829	1.3479	0.7106	0.6871	0.6498	1.1438	0.7352	1.0331	1.0095	0.5438	0.6978	1.1364	0.7931	1.2595	1.5201	0.7819	1.1387	0.4605
9338	TAG54:3-FA18:1	Triacylglycerol	TAG Ester	53906	GC-FID	100010054		1.3463	2.8165	0.9539	1.7793	2.4686	0.8681	0.765	0.9427	2.5164	9.1931	1.0461	1.3665	0.5479	0.8926	2.648	0.4953	1.3789	1.1788	0.9169	0.9127	1.0495	0.9494	1.5049	1.4055	0.7981	1.4283	0.5396
9353	TAG54:4-FA18:0	Triacylglycerol	TAG Ester	53907	GC-FID	100010055		0.5482	0.8731	1.6808	0.9475	1.7899	1.1104	0.5096	1.1237	2.0018	9.2531	0.6619	0.8389	0.4324	1.2531	1.0793	1.0879	0.8395	1.0008	1.1406	0.7052	1.9339	0.7998	1.7247	1.5873	0.8581	2.0299	0.3371
9359	TAG54:4-FA20:2	Triacylglycerol	TAG Ester	53908	GC-FID	100010056		0.3423	0.7689	1.8953	0.8985	1.7095	1.2292	0.4655	1.2894	1.7436	5.1486	1.0525	0.8825	0.8229	1.282	0.8755	0.6935	0.9956	1.0438	1.0044	0.9177	2.201	1.4016	1.5122	1.3459	0.9805	1.8471	0.3562
9360	TAG54:4-FA20:3	Triacylglycerol	TAG Ester	53909	GC-FID	100010057		0.3234	1.4096	1.3512	0.6999	2.5285	0.7436	0.5247	1.3334	1.2623	7.5271	1.3857	0.8997	0.7307	1.1754	0.9579	0.343	1.0321	1.0913	0.7116	0.8732	1.5054	1.7214	1.0586	0.9679	1.0369	1.545	0.4395
9373	TAG54:5-FA18:2	Triacylglycerol	TAG Ester	53910	GC-FID	100010058		0.4516	0.724	1.4796	1.1138	1.9625	1.1209	0.483	1.0937	1.5856	7.6778	0.478	0.9063	0.3891	1.2481	1.1522	1.1519	0.8942	0.8193	1.8871	0.6447	1.6342	0.7141	1.424	1.2976	0.561	2.0927	0.2711
9399	TAG54:6-FA20:4	Triacylglycerol	TAG Ester	53911	GC-FID	100010059		0.3813	0.7931	2.074	0.9168	2.1852	1.0559	0.6674	1.6119	0.9837	8.7464	1.0163	0.9247	0.9638	2.2718	0.8573	0.7481	1.1011	1.2207	1.0923	0.4959	2.1775	1.3974	1.4516	1.3213	0.8621	2.3869	0.3825
9518	TAG55:5-FA18:1	Triacylglycerol	TAG Ester	53912	GC-FID	100010060		0.894	0.9977	1.0715	0.8069	1.6134	0.7119	0.7357	1.0571	1.4206	8.4108	1.0023	0.9299	0.7452	1.2718	1.1729	0.6069	1.0887	1.1856	0.8568	0.738	1.3302	1.1086	1.2669	1.152	0.7008	1.2196	0.5667
9519	TAG55:5-FA18:2	Triacylglycerol	TAG Ester	53913	GC-FID	100010061		0.6359	0.6103	1.55	1.0091	2.1393	0.7915	0.6673	1.6186	1.7005	14.426	1.0894	0.7294	0.5843	1.2586	1.0029	0.8877	0.9851	0.9971	1.2349	0.6855	1.6951	1.0499	1.6446	1.4836	0.594	1.6943	0.4043
9525	TAG55:5-FA20:4	Triacylglycerol	TAG Ester	53914	GC-FID	100010062		0.6386	1.1709	1.7723	0.8533	1.9002	0.9298	0.8313	1.3346	1.536	9.2547	0.9432	1.1017	0.8741	2.3729	1.1281	0.512	1.2011	1.7317	0.7544	0.6157	2.1465	1.8725	1.0227	0.9618	0.8144	1.6665	0.6338
9534	TAG55:6-FA18:1	Triacylglycerol	TAG Ester	53915	GC-FID	100010063		0.9059	1.029	1.1543	1.068	1.0354	0.9803	0.9049	1.0012	1.0784	1.638	0.9481	1.0107	0.9523	1.0106	0.9871	1.0746	0.9575	1.0466	0.9774	1.0229	1.1517	0.9988	0.9163	0.9959	1.0012	1.0332	0.9478
9548	TAG55:7-FA18:1	Triacylglycerol	TAG Ester	53916	GC-FID	100010064		0.9496	1.121	1.1001	1.0749	1.1407	0.8405	0.9782	1.0784	1.3872	2.8101	1.0383	0.9617	0.8541	0.9407	1.0136	0.9292	0.9461	1.0353	0.8379	0.9993	1.0489	0.9025	1.0391	1.0635	0.993	1.0007	0.9853
9553	TAG55:7-FA20:4	Triacylglycerol	TAG Ester	53917	GC-FID	100010065		0.9451	1.0488	0.9901	1.0457	0.9581	0.9847	0.9194	1.0411	1.014	1.2281	0.9966	0.9613	0.9347	1.0502	1.0605	0.9896	1.0247	1.0588	1.0197	1.0141	1.059	0.9605	1.0034	1.0202	0.9807	0.9942	1.0268
9656	TAG56:4-FA22:4	Triacylglycerol	TAG Ester	53918	GC-FID	100010066		0.3838	1.2515	1.2463	0.6944	2.5037	0.8275	0.5716	1.4108	1.1279	9.6243	1.5694	0.7624	0.7917	1.2858	0.7566	0.2822	1.2193	1.1462	0.5073	0.5263	1.6096	1.5899	1.0417	0.9583	1.0482	1.462	0.4868
9663	TAG56:5-FA18:0	Triacylglycerol	TAG Ester	53919	GC-FID	100010067		0.4898	1.2823	1.6518	1.0075	2.6447	1.4813	0.8201	1.1665	1.6388	9.0326	0.9307	0.9239	0.5549	1.7898	1.2106	0.7444	0.9925	1.4618	0.7872	0.7525	1.7963	1.1108	0.808	0.7742	1.019	1.7851	0.5307
9664	TAG56:5-FA18:1	Triacylglycerol	TAG Ester	53920	GC-FID	100010068		0.5863	1.5558	1.2817	0.9906	2.5332	0.973	0.6708	1.1479	1.4569	7.9553	1.0094	0.9827	0.6043	1.3286	1.4042	0.5194	1.2277	1.2665	1.0327	0.841	1.2358	1.2079	0.962	0.8744	0.9139	1.4946	0.521
9682	TAG56:6-FA18:0	Triacylglycerol	TAG Ester	53921	GC-FID	100010069		0.4223	0.8782	2.3082	1.0947	2.4987	1.8553	0.912	1.2052	1.3723	8.5845	0.7432	0.9339	0.4998	2.251	1.2191	1.121	0.9169	1.5801	1.0992	0.6647	2.545	0.926	0.8055	0.7916	1.0661	2.4107	0.4761
9693	TAG56:6-FA22:4	Triacylglycerol	TAG Ester	53922	GC-FID	100010070		0.3415	0.7229	1.8471	0.8888	2	1.1521	0.5604	1.4198	1.1677	7.7555	0.9926	0.8715	0.8343	1.653	0.6724	0.5792	1.0341	1.1922	1.0074	0.6292	2.0685	1.3477	1.2256	1.1489	0.9026	2.1195	0.4083
9718	TAG56:8-FA16:0	Triacylglycerol	TAG Ester	53923	GC-FID	100010071		0.3145	0.7817	5.6196	0.796	2.2121	2.42	1.0856	1.3734	1.2006	10.7509	0.9144	1.1546	0.3588	3.5721	1.0999	1.6179	0.8383	1.267	0.7967	0.6608	5.2238	0.5629	0.7653	0.6359	1.6651	3.4217	0.2933
9723	TAG56:8-FA18:3	Triacylglycerol	TAG Ester	53924	GC-FID	100010072		0.5026	1.0505	1.2847	0.6776	2.36	0.6354	0.7785	1.3194	0.7917	8.5711	0.5098	0.8835	0.6904	1.9916	1.52	0.7056	1.2271	1.5274	1.0124	0.5423	1.5547	1.0693	1.1882	0.992	0.805	2.4694	0.371
9743	TAG56:9-FA20:5	Triacylglycerol	TAG Ester	53925	GC-FID	100010073		0.5253	1.0502	3.3674	0.8049	1.7303	0.8236	0.8871	1.4195	0.6499	21.1214	0.5154	0.8101	0.6943	2.7581	3.0764	5.1811	1.1629	1.599	1.0433	0.451	2.5731	0.9527	0.9567	0.9313	0.9218	3.0692	0.2967
9991	TAG58:7-FA18:2	Triacylglycerol	TAG Ester	53926	GC-FID	100010074		0.4317	0.8527	1.9727	0.9541	1.9759	1.2791	0.7182	1.094	1.1473	6.614	0.8174	0.9579	0.6184	1.8876	0.9923	1.0077	1.0541	1.3114	1.1569	0.7529	2.2206	0.9609	1.009	0.8343	1.0426	2.105	0.515
10032	TAG58:9-FA20:4	Triacylglycerol	TAG Ester	53927	GC-FID	100010075		0.5113	1.0653	1.4369	0.787	2.4399	0.7105	0.9861	1.8878	0.4315	14.4219	0.8155	1.0139	1.5044	2.3056	1.1061	0.9693	1.2434	1.4125	0.6701	0.4335	1.7797	1.2941	0.8104	0.7534	1.0939	1.9571	0.5218
7933	CE(18:2)	Cholesterol Ester	CE Ester	53968	GC-FID	100010116		1.0733	0.9296	0.8913	0.9528	0.6987	0.9182	1.056	0.8147	1.4491	1.5899	0.9565	0.9609	0.9851	0.7535	0.5814	1.2676	1.2289	1.19	0.8843	1.0149	1.342	1.1912	1.2661	1.1211	1.2737	1.5931	0.8364
7934	CE(18:3)	Cholesterol Ester	CE Ester	53969	GC-FID	100010117		0.8702	0.9473	0.763	0.6763	0.9761	0.5162	1.03	1.1137	1.0219	1.941	0.9628	0.9972	0.8477	0.6135	0.5653	0.9635	1.2575	1.2233	0.6656	1.493	1.4086	2.0922	1.2709	1.0028	1.739	1.7423	0.5586
7947	CE(22:6)	Cholesterol Ester	CE Ester	53970	GC-FID	100010118		1.0067	1.0097	1.2887	0.7626	0.7569	1.1065	1.4161	0.9649	0.9187	1.0136	1.0169	1.3683	0.6118	1.2676	0.6779	1.2042	1.4364	0.9782	0.6482	0.8076	2.837	0.595	0.8	0.7217	1.2631	2.7925	0.9933
7951	CER(16:0)	Sphingolipids	Ceramide	53971	GC-FID	100010119		0.8235	1.3994	1.0245	0.8875	1.0188	0.8403	1.4355	0.9072	1.6069	2.5656	0.9358	0.8378	1.0453	0.636	0.6857	0.9801	1.0893	1.1025	0.7001	0.9379	1.0549	1.8809	1.0842	1.2649	1.0814	1.5983	0.7716
7956	CER(20:1)	Sphingolipids	Ceramide	53972	GC-FID	100010120		0.6918	0.6918	0.6918	0.8931	0.956	0.6918	0.6918	0.6918	2.3648	0.6918	0.6918	0.6918	0.6918	0.6918	0.6918	0.6918	0.7044	1.044	0.8805	0.6918	0.6918	0.6918	1.1321	0.6918	1.2327	1.3585	0.6918
8019	DAG(12:0/18:0)	Diacylglycerol	DAG Ester	53973	GC-FID	100010121		0.6257	0.6257	0.8187	0.6257	0.6257	0.6257	0.6257	0.6257	1.3139	1.9703	1.2736	0.6257	0.6257	0.6257	0.6257	0.6257	0.6257	0.6257	0.6257	0.6257	0.6257	0.6257	0.6257	1	0.6257	0.6257	0.6257
8034	DAG(14:0/20:0)	Diacylglycerol	DAG Ester	53974	GC-FID	100010122		0.8638	0.6257	0.7557	0.6257	0.92	0.6257	0.9938	0.7724	1.6784	2.6538	1.0255	0.7276	1.2004	0.6257	0.6336	0.6257	1.0185	0.6257	0.7882	0.9288	1.6678	1.551	1.232	1	0.9359	1.4174	0.6634
8035	DAG(14:0/20:4)	Diacylglycerol	DAG Ester	53975	GC-FID	100010123		0.6491	0.9817	2.3043	0.6288	1.3103	0.5801	0.5801	1.1846	0.8682	8.5558	2.0162	0.5963	1.0183	1.2008	0.6572	0.5801	0.8316	0.9371	0.5801	0.6126	1.9189	1.3144	0.9574	1.2738	1.2495	1.0426	0.5801
8045	DAG(15:0/18:2)	Diacylglycerol	DAG Ester	53976	GC-FID	100010124		0.8389	0.6763	1.3566	0.8037	0.8085	3.1763	2.8534	1.2316	1.7989	6.0825	1.004	0.7772	0.8277	1.2019	2.008	0.5417	0.9487	1.121	0.9022	0.8077	1.899	1.3389	1.2877	1.1995	0.778	0.996	0.5248
8050	DAG(16:0/16:0)	Diacylglycerol	DAG Ester	53977	GC-FID	100010125		0.4428	1.0478	1.7125	0.7427	2.2941	0.8306	0.579	1.1933	2.655	14.0229	3.4781	0.7395	1.0387	0.6222	0.6557	0.2557	0.9613	0.7302	0.2803	0.5756	1.4913	2.5324	1.7403	1.4342	1.2081	0.9317	0.3211
8051	DAG(16:0/16:1)	Diacylglycerol	DAG Ester	53978	GC-FID	100010126		0.5113	0.9554	1.5804	0.9823	2.367	1.0642	0.641	1.6049	1.6318	9.7933	3.4312	0.9223	0.9872	0.9382	1.3235	0.3829	1.1327	0.8648	0.5541	0.7804	1.644	4.2875	1.9229	2.2557	1.4875	1.0128	0.3902
8056	DAG(16:0/18:3)	Diacylglycerol	DAG Ester	53979	GC-FID	100010127		0.398	1.1575	1.1074	0.5867	2.5232	0.6709	0.5769	0.8968	1.2595	10.5812	1.0293	1.0653	0.7253	0.9841	1.0159	0.3755	1.116	0.9267	0.5226	0.5446	1.4689	1.6844	2.0476	1.8065	0.9353	1.5433	0.2076
8063	DAG(16:0/22:6)	Diacylglycerol	DAG Ester	53980	GC-FID	100010128		0.7772	0.7949	4.8734	0.9215	1.8405	1.9266	0.9165	1.3038	1.1013	12.7823	2.0481	1.1772	0.6076	2.0228	1.0861	0.9873	0.8051	1.0127	0.6304	0.6203	3.8506	0.9114	0.6633	0.7418	1.8658	2.0886	0.3114
8068	DAG(16:1/18:3)	Diacylglycerol	DAG Ester	53981	GC-FID	100010129		0.65	0.812	1.296	1	2.762	0.778	0.55	1.106	0.768	5.742	0.994	0.742	0.734	0.988	1.126	0.458	1.088	1.52	1.096	0.568	1.492	2.652	1.668	1.65	0.924	1.818	0.458
8080	DAG(18:0/18:3)	Diacylglycerol	DAG Ester	53982	GC-FID	100010130		0.7721	1.1085	1.6121	0.9908	2.3879	0.8217	0.7335	1.2022	1.1618	9.1728	0.9651	1	0.7004	1.0074	0.8456	0.5809	1.2096	0.9283	0.9871	0.8015	1.6581	1.4596	1.9853	1.7261	0.8493	1.8548	0.4191
7906	FFA(14:1)	Free Fatty Acids	Monounsaturated FFA	53985	GC-FID	100010133		1.0216	0.9039	0.8951	0.6874	0.8377	2.3645	1.3687	1.279	0.6333	0.6625	0.8055	0.9412	1.1202	1.1163	1.3593	1.1297	0.7484	1.2923	1.0153	1.3163	0.9787	2.064	1.0018	1.031	0.8395	0.8389	1.0148
7897	FFA(16:0)	Free Fatty Acids	Saturated FFA	53986	GC-FID	100010134		0.9691	0.9785	1.0562	0.9019	1.2309	1.1128	0.9528	1.0302	0.9074	0.9167	0.8984	1.0311	1.0833	0.9007	0.7137	1.0052	0.9455	0.9582	0.8816	1.0689	1.114	1.2517	0.9083	1.0328	1.0387	1.1797	1.1196
7909	FFA(20:1)	Free Fatty Acids	Monounsaturated FFA	53987	GC-FID	100010135		0.8701	1.4763	0.8178	1.0005	1.2276	1.291	0.9995	1.0486	0.6845	1.1403	0.8491	0.9452	1.0413	0.8022	0.9352	1.201	1.0064	1.4177	0.933	1.2887	0.925	1.4022	0.8771	0.8778	0.9752	1.0054	1.5119
7992	HCER(26:1)	Sphingolipids	Hexosylceramide	53988	GC-FID	100010136		0.8667	0.9	0.7	1	0.7333	0.7	0.7	0.9444	1.4222	0.7	0.7	0.7	1.0889	0.8333	0.7	0.7	1.4667	1.4444	0.8	0.7	1.2	1.4778	1.0889	0.7	0.7	0.7	1.2222
8001	LCER(24:0)	Sphingolipids	Lactosylceramide	53989	GC-FID	100010137		1.1099	1.5113	0.4235	0.9392	0.6534	0.603	1.3062	1.1624	1.3271	0.7845	0.5862	0.7449	1.0171	0.8148	0.3818	1.2612	1.282	0.9829	0.7308	0.9425	0.9466	1.0205	0.958	1.1099	1.1637	1.116	1.0857
6975	LPC(20:2)	Lysophosphatidylcholine	LPC Ester	53990	GC-FID	100010138		1.1827	0.7833	1.0911	1.1408	1.0394	0.7787	1.0267	1.4696	0.8264	0.9409	0.869	0.8461	1.0057	0.7849	1.1219	1.2767	0.9626	0.7746	0.9709	1.2131	0.8128	1.2287	0.9943	0.89	1.0131	1.4314	0.8403
7224	LPE(17:0)	Lysophosphatidylethanolamine	LPE Ester	53993	GC-FID	100010141		0.7005	0.8502	1	0.9565	0.7005	0.7005	0.8986	0.7826	1.0628	0.7005	0.7005	0.9903	0.8551	1.2609	1.628	0.7633	1.087	1.1256	0.8454	0.971	1.0097	1.5072	1.256	1.1643	0.7005	1.0483	0.9324
7235	LPE(20:5)	Lysophosphatidylethanolamine	LPE Ester	53994	GC-FID	100010142		0.7279	0.7279	1.034	0.7279	0.7279	0.7279	0.7279	0.7279	0.7279	0.7279	0.7279	0.7279	0.9252	0.7279	2.1293	0.7959	0.7279	0.7279	0.7279	0.7279	0.7279	0.966	0.7279	0.7279	1.0748	0.8027	0.7279
6758	PC(14:0/18:1)	Phosphatidylcholine	PC Ester	53996	GC-FID	100010144		0.9965	0.937	1.1959	0.6776	0.8087	0.495	0.889	0.7877	1.3331	1.7756	1.0742	1.0035	0.8697	0.6918	0.9162	0.7933	1.2797	1.2	0.9155	1.2272	1.1046	1.4379	0.9754	1.0672	1.0408	1.0306	0.7979
6770	PC(14:0/22:5)	Phosphatidylcholine	PC Ester	53998	GC-FID	100010146		0.8448	0.8448	0.8448	0.8448	0.8448	0.8448	0.8448	0.8448	0.8448	1.0497	0.8448	0.8448	0.8448	0.8448	0.8448	0.8448	0.8448	0.8448	0.8448	0.8448	0.9503	0.8448	0.8448	0.8448	0.8448	1.5383	0.8448
6771	PC(14:0/22:6)	Phosphatidylcholine	PC Ester	53999	GC-FID	100010147		0.8833	0.8833	1.3328	0.8833	0.8833	0.8833	0.8833	0.8833	0.9617	0.8833	0.8833	0.8833	0.8833	0.8833	0.8833	0.8833	1	0.8833	0.8833	0.8833	1.5112	0.8833	0.8833	0.8833	0.8833	1.0207	0.8833
6802	PC(16:0/22:6)	Phosphatidylcholine	PC Ester	54003	GC-FID	100010151		0.6432	1.1934	1.6851	0.7146	1.014	1.1373	1.1013	0.8226	0.774	1.5293	1.1513	1.2818	0.5546	1.162	0.8559	1.0934	1.0493	1.044	0.6617	0.7286	1.852	0.5517	0.7105	0.8215	0.9362	2.1305	0.986
6815	PC(18:0/14:0)	Phosphatidylcholine	PC Ester	54004	GC-FID	100010152		0.7603	0.7603	1.083	0.7603	0.7603	0.7603	0.7603	0.7603	0.7603	1	0.7603	0.7603	0.7603	0.7603	0.7603	0.7603	0.8483	0.7603	0.7603	0.7603	0.7603	0.8825	0.9301	0.7603	0.7603	1.0316	0.7603
6993	PE(14:0/18:2)	Phosphatidylethanolamine	PE Ester	54005	GC-FID	100010153		1	1	1	1	1	1	1	1	1	1	1	1	1	1	1	1	1	1	1	1	1	1	1	1	1	1	1
7033	PE(16:0/18:1)	Phosphatidylethanolamine	PE Ester	54007	GC-FID	100010155		0.5385	1.5464	0.7505	0.6042	1.443	0.4391	0.4902	1.1289	0.9306	2.8988	2.367	1.138	1.1007	0.4656	1.3836	0.5434	1.2042	0.9327	0.3938	0.6519	0.5863	1.0673	1.41	1.5088	0.6687	1.1048	0.4907
7055	PE(17:0/18:2)	Phosphatidylethanolamine	PE Ester	54009	GC-FID	100010157		1	1	1	1	1	1	1	1	1	1	1	1	1	1	1	1	1	1	1	1	1	1	1	1	1	1	1
7075	PE(18:0/18:2)	Phosphatidylethanolamine	PE Ester	54011	GC-FID	100010159		0.7209	1.2039	1.0556	0.6371	1.4864	0.6581	0.5832	0.9416	1.547	3.591	1.4011	0.7061	0.9561	0.4927	0.9168	1.1264	1.1111	1.0162	0.5066	0.7223	0.9608	1.1628	1.7948	1.5429	0.8162	1.4016	0.4353
7079	PE(18:0/20:2)	Phosphatidylethanolamine	PE Ester	54012	GC-FID	100010160		0.7153	1.076	1.1495	0.7153	1.2721	0.7153	0.7153	0.924	0.8074	1.5203	1.1543	1.2099	0.7153	0.7452	0.7153	0.7321	0.9013	1.2267	0.8176	0.7153	0.7153	0.7153	1.4833	0.9037	0.7153	1.1699	0.7153
7081	PE(18:0/20:4)	Phosphatidylethanolamine	PE Ester	54013	GC-FID	100010161		0.4337	1.5519	1.1452	0.9198	1.7412	0.8773	0.8895	0.979	0.8129	3.6636	1.5822	1.0716	0.7421	0.8074	1.0024	0.7706	1.3431	1.4671	0.6748	0.6415	1.2293	1.2184	0.9976	0.957	0.7385	1.6644	0.4718
7154	PE(O-18:0/22:4)	Phosphatidylethanolamine	PE Ether	54019	GC-FID	100010167		0.835	0.7724	0.7724	0.7724	0.7724	0.7724	0.7724	0.8858	0.7724	0.7724	0.7724	0.7724	0.7724	0.7724	0.7724	0.7724	1.1032	0.7724	1.0531	0.7724	0.7724	1.1053	0.7724	0.7724	1.0282	0.7724	0.9718
7171	PE(P-16:0/20:4)	Phosphatidylethanolamine	PE Plasmalogen	54020	GC-FID	100010168		1.4691	0.9155	0.564	0.7496	1.2165	0.8873	0.9586	0.6763	0.6331	1.9122	1.0219	0.8143	0.663	0.6055	0.5488	1.0234	1.8552	1.5433	0.545	1.2786	0.9993	1.0485	1.0048	1.0195	1.5128	1.7855	1.5303
7214	PE(P-18:1/22:6)	Phosphatidylethanolamine	PE Plasmalogen	54022	GC-FID	100010170		1.5319	0.981	0.8383	0.715	0.9806	1.0331	1.019	1.044	0.6364	1.7562	0.7549	0.9666	0.426	1.075	0.8738	1.4605	1.1095	1.4053	0.4548	1.127	1.2233	0.5074	0.9026	0.5375	1.3273	1.6192	1.1518
7217	PE(P-18:2/22:6)	Phosphatidylethanolamine	PE Plasmalogen	54023	GC-FID	100010171		1	1	1	1	1	1	1	1	1	1	1	1	1	1	1	1	1	1	1	1	1	1	1	1	1	1	1
7536	PI(18:0/18:3)	Phosphatidylinositol	PI Ester	54024	GC-FID	100010172		0.5757	0.5757	1.1745	0.6615	0.8485	0.6551	0.9903	0.7309	0.8113	1.014	0.5757	0.9991	0.5757	0.5757	1.0997	0.5757	0.6909	0.5757	0.8903	1.3403	0.5757	1.0009	1.6276	1.0732	0.7911	1.1575	0.5757
7540	PI(18:0/20:3)	Phosphatidylinositol	PI Ester	54025	GC-FID	100010173		0.9206	0.9121	1.8456	0.6902	1.0241	0.8729	0.4395	0.8423	1.5462	2.4422	1.6196	1.0154	0.6865	0.5715	0.6401	1.1559	0.7717	0.7487	1.2772	0.8889	0.976	1.6131	1.5695	1.4905	1.0654	1.2618	0.531
7541	PI(18:0/20:4)	Phosphatidylinositol	PI Ester	54026	GC-FID	100010174		0.7587	1.285	1.3173	0.9939	1.1483	0.9889	0.6258	0.7878	1.1393	2.5096	1.0838	0.9711	0.9716	0.8313	0.7995	0.8984	1.1422	1.0061	1.1717	0.7196	1.1165	1.3584	1.4033	1.499	0.8457	1.5583	0.8334
7555	PI(18:1/20:3)	Phosphatidylinositol	PI Ester	54027	GC-FID	100010175		1.3748	0.5131	0.5131	1.1039	0.5131	0.5131	0.5131	0.5131	1.5463	1.0722	0.7245	0.6989	0.7583	0.5131	0.5131	1.085	0.5131	0.5131	0.7962	0.765	0.5131	1.1946	0.8213	1.0082	0.9918	0.5131	0.5131
8014	SM(24:1)	Sphingolipids	Sphingomyelin	54028	GC-FID	100010176		1.174	0.861	1.0335	0.8311	0.6867	0.8493	1.158	0.8588	1.5197	1.2837	0.9633	1.2868	0.9158	0.8093	0.8501	1.2446	1.3115	1.1054	0.8803	0.8705	0.9665	1.1927	1.1497	1.0988	1.175	1.4242	1.087
8430	TAG42:0-FA14:0	Triacylglycerol	TAG Ester	54029	GC-FID	100010177		0.9184	0.1788	5.5218	0.5479	1.0464	0.1802	1.1927	0.9685	26.6793	9.0119	10.9482	0.1632	1.0315	0.2072	1.9553	0.1321	0.5073	0.4247	0.1145	0.3231	2.3285	2.0129	3.7365	3.4067	0.6915	0.2269	0.4633
8434	TAG42:1-FA12:0	Triacylglycerol	TAG Ester	54030	GC-FID	100010178		0.754	0.1473	3.4026	1	0.5974	0.1473	0.4576	0.7204	9.246	3.671	26.7176	0.1473	1.0541	0.1808	4.5228	0.1473	0.3197	0.2246	0.1678	0.2274	2.109	1.2898	2.4623	1.9497	0.2423	0.3234	0.7484
8472	TAG44:0-FA16:0	Triacylglycerol	TAG Ester	54031	GC-FID	100010179		0.5746	0.1667	3.465	0.4884	1.5748	0.1745	0.9225	1.0775	11.1331	11.0988	7.1174	0.1686	1.2499	0.2767	1.1942	0.0796	0.5638	0.3607	0.0882	0.2644	1.9238	2.7153	2.6587	2.4369	0.9053	0.4029	0.3041
8479	TAG44:1-FA14:1	Triacylglycerol	TAG Ester	54032	GC-FID	100010180		0.7914	0.407	3.773	0.4376	1.2168	0.3149	0.7055	1.1104	15.2618	10.5133	3.9182	0.6115	0.7669	0.5072	0.6421	0.2618	1	0.7914	0.2618	0.4397	1.6258	3.7832	4.1452	3.5624	1.4969	0.6074	0.3436
8491	TAG44:2-FA16:1	Triacylglycerol	TAG Ester	54033	GC-FID	100010181		1.0286	0.3774	2.3429	0.5323	1.5278	0.3323	0.8571	1.5895	7.0391	6.3338	4.5654	0.3338	0.6511	0.6436	1.6526	0.3368	0.9714	0.7143	0.3188	0.4932	1.4271	3.4556	3.3579	3.2466	0.6812	0.5173	0.2496
8553	TAG46:1-FA18:0	Triacylglycerol	TAG Ester	54034	GC-FID	100010182		1.3161	0.3107	2.1381	0.9137	1.3161	0.2697	1.206	0.9569	9.8091	8.8641	2.7379	0.2643	0.4854	0.3603	1.1683	0.1402	0.6419	0.5534	0.2384	0.411	1.0431	1.5027	2.7983	2.7972	0.4498	0.3873	0.3743
8558	TAG46:2-FA12:0	Triacylglycerol	TAG Ester	54035	GC-FID	100010183		0.5472	0.2776	3.625	0.6209	1.5694	0.3838	0.5677	1.4026	3.4259	8.2107	6.9075	0.3546	1.0969	0.5133	2.0536	0.1979	0.8529	0.6172	0.4676	0.4184	2.9807	2.3816	3.0444	2.6465	0.8049	0.9031	0.3329
8560	TAG46:2-FA14:0	Triacylglycerol	TAG Ester	54036	GC-FID	100010184		0.5399	0.296	4.1035	0.5647	1.1486	0.6273	0.6234	1.0151	4.9998	8.9009	2.7342	0.6503	0.7118	0.8431	0.9273	0.4024	0.9849	0.8427	0.6334	0.5061	3.2537	1.8144	2.5019	2.3614	1.0621	1.1211	0.1687
8566	TAG46:2-FA18:1	Triacylglycerol	TAG Ester	54037	GC-FID	100010185		1.4599	0.5628	2.1057	0.7267	1.4174	0.2643	0.7645	1.0653	5.8079	7.8243	2.9234	0.3918	0.5762	0.5036	1.9025	0.1667	0.9347	0.7732	0.403	0.4189	1.257	1.5918	2.4899	2.4262	0.5098	0.5829	0.2451
8570	TAG46:3-FA12:0	Triacylglycerol	TAG Ester	54038	GC-FID	100010186		0.7763	0.2628	3.0312	0.6834	1.6375	0.4071	0.632	1.4211	3.2751	8.0031	7.165	0.3857	0.8539	0.7592	2.6498	0.2995	0.9389	0.8056	0.7567	0.4438	3.1161	1.9144	3.7139	3.4254	0.8148	1.1265	0.3423
8579	TAG46:3-FA18:3	Triacylglycerol	TAG Ester	54039	GC-FID	100010187		0.7439	0.3338	2.2362	0.485	1.832	0.3551	0.7645	0.9971	4.6772	11.5649	4.7806	0.3815	0.7894	0.8547	2.4835	0.226	1.069	0.7762	0.5304	0.449	2.047	1.5752	3.7454	3.5429	0.7528	1.0029	0.2663
8663	TAG48:1-FA14:0	Triacylglycerol	TAG Ester	54040	GC-FID	100010188		0.5375	0.7591	2.3809	0.5925	1.5575	0.56	0.5186	0.9511	3.6809	11.9612	2.9806	0.8474	0.8033	0.7202	1.0855	0.2186	1.0598	0.841	0.3232	0.5687	1.9469	2.0121	2.0307	1.84	1.3288	0.991	0.3014
8685	TAG48:2-FA18:2	Triacylglycerol	TAG Ester	54041	GC-FID	100010189		0.3499	0.4117	2.9288	0.5962	1.3346	0.7813	0.4788	1.0392	2.7467	9.6943	2.0931	0.6622	0.7237	0.9867	0.7857	0.4187	1.0133	0.8784	0.5899	0.5174	2.7141	1.6735	2.1508	1.9748	1.1144	1.3514	0.2237
8710	TAG48:4-FA18:2	Triacylglycerol	TAG Ester	54042	GC-FID	100010190		0.5445	0.2337	3.9496	0.7313	1.3376	0.5784	0.5359	1.6678	2.1648	6.7808	3.4463	0.5589	0.6709	1.0056	1.7278	0.7097	0.8596	0.7181	1.8676	0.5502	2.9349	0.9944	2.6361	2.3163	0.4937	1.4727	0.204
8721	TAG48:5-FA18:2	Triacylglycerol	TAG Ester	54043	GC-FID	100010191		0.8919	0.2794	2.4104	0.6882	1.4941	0.5304	0.5785	1.4223	2.4081	9.6701	3.0071	0.5801	0.5359	1.0395	2.8224	0.6417	0.9605	0.9155	1.2463	0.502	2.0142	0.9266	6.4002	5.4128	0.5817	1.3141	0.1902
8745	TAG49:0-FA16:0	Triacylglycerol	TAG Ester	54044	GC-FID	100010192		0.6111	0.5877	2.3706	0.5651	1.4856	0.4166	0.7516	1.1846	6.8145	16.5803	3.314	0.5997	0.8958	0.6314	0.7392	0.1846	1.0045	0.9955	0.2013	0.5622	1.9283	3.4538	2.5773	2.312	1.2142	0.9118	0.4953
8757	TAG49:1-FA17:0	Triacylglycerol	TAG Ester	54045	GC-FID	100010193		0.7641	0.5025	1.7767	0.5598	1.1034	0.4105	0.6021	1.1159	3.9971	10.3093	2.394	0.679	0.7131	0.8815	0.8095	0.2034	0.955	1.045	0.3486	0.5694	1.9699	3.2359	2.1238	1.9204	1.089	0.8511	0.3718
8766	TAG49:2-FA14:0	Triacylglycerol	TAG Ester	54046	GC-FID	100010194		0.5679	0.4321	2.1	0.629	1.0467	0.6332	0.562	1.0965	3.4946	7.9898	1.6367	0.7824	0.7041	0.9754	1.1081	0.2162	0.9898	1.04	0.6079	0.6767	2.4377	2.1348	1.8922	1.5799	0.7894	1.0102	0.2843
8774	TAG49:2-FA18:2	Triacylglycerol	TAG Ester	54047	GC-FID	100010195		0.4699	0.4506	2.4533	0.7549	0.9594	0.7471	0.6128	1.0265	3.5718	8.5551	1.2018	0.7545	0.7572	0.9981	0.4933	0.3484	1.1138	1.1947	0.5835	0.5141	2.3633	1.8589	2.0948	1.7588	0.7632	1.3902	0.3548
8828	TAG50:1-FA14:0	Triacylglycerol	TAG Ester	54048	GC-FID	100010196		0.8042	1.0197	1.9744	0.7074	1.4673	0.5973	0.6166	0.9476	4.0263	11.026	1.8524	0.8591	0.5436	0.6576	1.4236	0.2727	0.9864	0.8723	0.4862	0.6972	1.7964	1.3675	1.7655	1.6299	0.9776	1.0136	0.3862
8848	TAG50:2-FA18:0	Triacylglycerol	TAG Ester	54049	GC-FID	100010197		0.6163	0.6502	2.3536	0.6564	1.5711	0.7514	0.6117	1.116	3.1462	10.6906	1.6546	0.6737	0.5866	0.8469	1.069	0.4177	0.9989	0.8696	0.674	0.6233	2.5044	1.5684	2.4297	2.0809	0.9594	1.2591	0.318
8860	TAG50:3-FA16:0	Triacylglycerol	TAG Ester	54050	GC-FID	100010198		0.3051	0.6883	1.586	0.8439	1.951	1.2586	0.4484	1.4196	1.6332	8.7928	1.7172	0.9154	0.7119	1.0291	0.879	0.4103	0.9709	1.0725	0.7442	0.6193	2.062	2.2737	2.3745	2.1964	1.173	1.6376	0.3151
8866	TAG50:3-FA18:3	Triacylglycerol	TAG Ester	54051	GC-FID	100010199		0.3299	1.0104	1.3502	0.5128	2.539	0.6641	0.4766	0.9463	1.863	14.5916	1.4514	0.8025	0.7131	1.2924	0.9764	0.2225	1.2124	0.9896	0.388	0.4149	1.6559	1.6694	2.3576	2.1355	1.2994	1.7488	0.2669
8877	TAG50:4-FA16:1	Triacylglycerol	TAG Ester	54052	GC-FID	100010200		0.3381	0.4215	1.0339	1.0154	1.4895	1.0669	0.4779	1.0912	1.0106	4.034	1.1205	0.9894	0.51	0.9108	1.3441	0.4522	0.6453	0.9501	1.0807	0.6317	1.5249	1.7814	1.868	1.7083	0.8442	1.2183	0.2114
8880	TAG50:4-FA18:2	Triacylglycerol	TAG Ester	54053	GC-FID	100010201		0.3857	0.3476	2.9277	0.9577	1.2167	1.1718	0.5491	1.1624	1.57	5.5532	0.8328	0.9518	0.509	1.4585	1.044	1.1879	0.8203	0.9217	1.9225	0.6732	3.1647	1.0423	1.7657	1.6932	0.6931	1.9489	0.1912
8885	TAG50:4-FA20:4	Triacylglycerol	TAG Ester	54054	GC-FID	100010202		0.3451	0.4852	3.2434	0.4845	1.7232	0.5109	0.5546	1.1145	1.4363	11.0661	2.8939	0.4734	1.0411	1.9604	0.721	0.2199	0.967	0.7924	0.4057	0.3783	2.1438	1.7621	1.3663	1.4204	0.8932	1.1463	0.2913
8912	TAG50:6-FA20:4	Triacylglycerol	TAG Ester	54055	GC-FID	100010203		0.604	0.3859	3.4451	0.6847	1.4136	0.4338	0.6747	1.6696	1.1412	9.3947	3.4262	0.4351	0.9912	1.5309	1.546	0.4868	1.0088	0.6797	1.0404	0.3972	1.9685	1.3405	2.0643	1.7654	0.5776	1.1652	0.3632
8964	TAG51:2-FA17:0	Triacylglycerol	TAG Ester	54056	GC-FID	100010204		0.5065	0.6937	1.7729	0.8438	1.372	0.8146	0.5777	1.3534	2.6388	10.1106	1.6024	0.815	0.9166	1.1205	0.9035	0.4049	1.0889	1.2628	0.5813	0.6892	2.5137	2.5295	2.1845	2.0353	1.0834	1.5428	0.4723
8994	TAG51:4-FA18:3	Triacylglycerol	TAG Ester	54057	GC-FID	100010205		0.7163	0.8486	1.2055	0.7227	1.2802	0.642	0.6747	0.9642	2.2852	7.5039	0.7805	1.0679	0.5454	1.3117	1.2989	0.2992	1.233	1.3291	0.6657	0.5134	1.4261	1.4372	1.9611	1.9084	0.7196	1.6081	0.3628
9005	TAG51:5-FA18:2	Triacylglycerol	TAG Ester	54058	GC-FID	100010206		0.6309	0.4513	1.9422	0.8582	0.9876	0.9609	0.6083	1.1663	2.0502	6.7003	0.4491	1.0858	0.4171	1.5607	1.0124	0.8333	0.9271	1.1596	1.2659	0.6452	2.1543	0.8213	2.0716	1.7403	0.6585	1.8773	0.3277
9033	TAG52:0-FA20:0	Triacylglycerol	TAG Ester	54059	GC-FID	100010207		0.7915	1.0621	1.3202	0.8899	1.5068	0.5184	1.053	1.0029	4.5585	12.0149	2.4295	0.6057	1.0331	0.4559	0.9971	0.3376	0.9396	0.8209	0.2689	0.5225	0.9375	1.259	1.3831	1.6694	0.9458	0.7778	0.4795
9064	TAG52:2-FA20:0	Triacylglycerol	TAG Ester	54060	GC-FID	100010208		0.6314	1.041	1.378	1.1346	1.4305	0.8956	0.7055	1.0173	2.4392	7.5882	1.2865	0.838	0.6163	0.7199	1.2916	0.5752	0.9827	0.8985	0.6926	0.7682	1.6379	0.892	1.2822	1.3341	0.7927	1.0749	0.4608
9069	TAG52:3-FA14:0	Triacylglycerol	TAG Ester	54061	GC-FID	100010209		0.5474	0.688	2.4927	0.7197	1.4597	0.7779	0.4739	0.9728	2.7216	6.4552	1.4897	0.9936	0.6325	1.0064	1.3526	0.4872	1.2202	1.0697	0.7462	0.8857	2.1942	1.3628	1.5327	1.235	1.0193	1.2792	0.2969
9089	TAG52:4-FA16:1	Triacylglycerol	TAG Ester	54062	GC-FID	100010210		0.5173	0.7531	1.1199	1.1963	1.5879	1.1038	0.5247	0.9889	1.3865	4.0717	0.6639	1.2152	0.4266	1.0902	1.6343	0.6596	0.6985	0.8709	1.2853	0.7684	1.4531	1.0111	1.2469	1.1218	0.7094	1.5341	0.2809
9107	TAG52:5-FA16:1	Triacylglycerol	TAG Ester	54063	GC-FID	100010211		0.4223	0.4894	1.4139	1.1407	1.3735	1.2247	0.4672	0.9844	1.1448	3.7664	0.4997	1.0496	0.3547	1.3963	1.318	1.0156	0.6144	0.7885	1.7517	0.7015	1.8856	0.8326	1.3597	1.2088	0.6578	1.8419	0.2029
9130	TAG52:6-FA18:3	Triacylglycerol	TAG Ester	54064	GC-FID	100010212		0.5376	0.7718	1.1765	0.938	2.1304	0.9695	0.6515	1.0305	1.2753	7.2754	0.5628	1.2702	0.4294	1.7044	1.9774	0.6485	1.0641	1.2186	1.5207	0.6368	1.6755	0.9542	2.5619	2.2944	0.9161	2.4624	0.2291
9134	TAG52:6-FA20:4	Triacylglycerol	TAG Ester	54065	GC-FID	100010213		0.4005	0.5178	3.0607	0.7474	1.8383	0.8081	0.6268	1.5332	1.0374	9.4762	1.1621	0.8318	0.9534	2.253	1.0056	0.6509	1.1247	0.9944	1.4147	0.4643	2.7656	1.6277	1.5969	1.4432	0.8383	2.0105	0.2926
9150	TAG52:7-FA20:5	Triacylglycerol	TAG Ester	54066	GC-FID	100010214		0.4492	0.7014	4.7653	0.7386	1.5999	0.7453	0.7222	1.3023	0.9952	11.2741	0.7044	0.7415	0.7044	2.7021	2.83	2.1956	1.0576	1.3477	0.8472	0.6203	3.402	1.2681	1.1454	0.9535	1.0048	2.2856	0.2559
9213	TAG53:3-FA17:0	Triacylglycerol	TAG Ester	54067	GC-FID	100010215		0.6676	0.8616	1.4178	1.0006	1.3293	0.9396	0.6006	1.1478	2.1733	7.4059	0.6709	0.983	0.6252	1.4549	1.0712	0.6016	0.9994	1.349	1.0072	0.7251	2.3163	1.2321	1.537	1.3524	0.6652	1.693	0.4746
9283	TAG54:0-FA18:0	Triacylglycerol	TAG Ester	54068	GC-FID	100010216		1.2637	1.2791	1.2512	1.9206	1.723	0.5088	0.5711	0.9867	3.2152	12.474	1.2688	0.521	0.574	0.4773	1.1024	0.3943	0.8211	0.7903	0.3432	0.7967	0.9905	1.0326	2.0309	2.1896	0.8803	0.9651	0.6868
9295	TAG54:1-FA18:0	Triacylglycerol	TAG Ester	54069	GC-FID	100010217		1.3417	2.0227	1.0835	2.2949	2.3098	0.5868	0.5483	0.9561	2.9587	15.0675	1.417	0.7329	0.4875	0.5553	1.6362	0.2856	0.9203	0.8469	0.3669	0.8557	1.2227	1.0941	2.0598	1.8422	0.9633	1.0367	0.509
9322	TAG54:2-FA18:1	Triacylglycerol	TAG Ester	54070	GC-FID	100010218		1.3276	2.7085	0.9007	1.7091	2.2463	0.6703	0.6278	0.9348	2.272	10.7818	1.1382	1.029	0.5062	0.6733	1.8256	0.3709	1.1331	1.0001	0.4781	0.8137	0.9936	0.9999	1.4223	1.379	0.8425	1.1632	0.4821
9382	TAG54:5-FA22:4	Triacylglycerol	TAG Ester	54071	GC-FID	100010219		0.3632	0.6539	1.7597	0.7253	2.2112	0.8688	0.5459	1.4037	1.1538	8.127	2.2153	0.8091	0.8926	1.4009	0.7273	0.3132	1.2243	1.2223	0.7809	0.6716	2.1185	2.2826	1.1611	1.1304	1.1074	1.4658	0.2778
9392	TAG54:6-FA18:1	Triacylglycerol	TAG Ester	54072	GC-FID	100010220		0.6913	1.0438	1.1555	0.9879	1.9074	0.9312	0.638	0.855	1.4878	8.7372	0.5059	1.2784	0.3487	1.4173	2.3065	0.7791	1.0121	1.0631	1.1449	0.6351	1.3636	0.6081	1.8977	1.6656	0.7847	2.0433	0.2687
9393	TAG54:6-FA18:2	Triacylglycerol	TAG Ester	54073	GC-FID	100010221		0.4098	0.534	1.6869	1.0648	1.7442	1.2359	0.4907	1.121	1.27	8.7098	0.454	0.9352	0.3754	1.5992	1.2165	1.553	0.8189	0.8457	2.3215	0.5662	2.0318	0.6424	1.6613	1.4944	0.5685	2.4355	0.2095
9398	TAG54:6-FA20:3	Triacylglycerol	TAG Ester	54074	GC-FID	100010222		0.4061	0.7995	1.5456	0.887	2.2202	0.8272	0.5609	1.4461	1.0293	6.0408	0.8671	0.9253	0.7227	1.5436	1.1841	0.6756	1.0026	1.1901	1.547	0.8563	1.6316	1.4749	1.5494	1.2379	0.9974	1.831	0.322
9412	TAG54:7-FA18:2	Triacylglycerol	TAG Ester	54075	GC-FID	100010223		0.4652	0.5294	1.6014	1.0054	1.7437	1.1173	0.5374	0.9519	1.2115	8.2814	0.3839	1.1302	0.3204	1.7789	1.6123	1.217	0.8416	0.9946	1.4191	0.5858	1.9651	0.5399	1.9709	1.8795	0.7534	2.6471	0.202
9436	TAG54:8-FA22:6	Triacylglycerol	TAG Ester	54076	GC-FID	100010224		0.3461	0.3518	6.423	0.5785	1.393	1.7747	1.0011	1.1053	0.9132	6.0007	1.0424	1.0405	0.2984	3.3239	1.2885	1.6252	0.6509	0.7687	0.9989	0.5427	6.3972	0.3388	0.5702	0.4468	1.2366	2.4501	0.1569
9490	TAG55:3-FA18:1	Triacylglycerol	TAG Ester	54077	GC-FID	100010225		1.6345	1.4102	0.9051	1.0939	2.2054	0.4945	0.6538	0.9791	2.6422	12.132	1.3	0.7603	0.6078	0.671	1.7352	0.357	1.0749	1.0209	0.5345	0.6918	0.9076	1.0698	1.4435	1.3276	0.5601	1.0829	0.4486
9504	TAG55:4-FA18:2	Triacylglycerol	TAG Ester	54078	GC-FID	100010226		0.969	0.7853	1.3375	1.1025	2.0874	0.6399	0.6011	1.4677	2.1962	12.7756	1.1129	0.848	0.5879	1.0078	1.1587	0.6982	0.9445	1.0778	0.9485	0.6038	1.5789	0.9922	1.6141	1.4503	0.5354	1.6171	0.4073
9593	TAG56:10-FA18:2	Triacylglycerol	TAG Ester	54079	GC-FID	100010227		1.2986	0.9	1.4795	0.9112	1.9148	0.645	0.6103	1.2501	2.118	11.7594	0.9512	0.7178	0.4674	1.2265	1.3576	1.1583	1.0154	0.9846	0.7185	0.6096	1.5228	0.8725	1.49	1.2147	0.6516	1.6414	0.3278
9582	TAG56:1-FA18:1	Triacylglycerol	TAG Ester	54080	GC-FID	100010228		1.9518	1.767	1.6369	2.486	1.7074	0.4833	0.7185	1.1613	3.9977	14.608	1.0771	0.5579	0.7436	0.5575	1.2414	0.6876	0.9229	0.6043	0.3468	0.6557	1.0981	0.5761	1.1158	1.2191	0.6767	0.8	0.5579
9684	TAG56:6-FA18:2	Triacylglycerol	TAG Ester	54081	GC-FID	100010229		0.3736	0.7601	1.7781	0.9957	1.9946	1.2558	0.6291	1.251	1.1484	6.8813	0.6597	0.7944	0.5516	1.6459	1.0094	0.8736	0.9672	1.2439	1.559	0.7165	1.941	1.05	1.027	1.0043	0.795	2.04	0.397
9688	TAG56:6-FA20:2	Triacylglycerol	TAG Ester	54082	GC-FID	100010230		0.3951	0.7753	1.5417	1.0915	1.5795	0.9161	0.5587	1.0413	1.0642	5.2531	0.5483	0.8639	0.5836	1.366	1.3795	1.0509	0.9587	1.0921	2.0714	0.803	1.5501	0.8258	1.1866	1.2207	0.6512	1.9267	0.3503
9694	TAG56:6-FA22:5	Triacylglycerol	TAG Ester	54083	GC-FID	100010231		0.371	1.3652	1.9734	0.8381	2.178	1.1663	0.7041	0.985	1.3941	8.7944	1.0826	0.8508	0.6096	1.8742	1.0764	0.6036	1.015	1.4075	0.5071	0.7355	2.0911	1.0921	0.7431	0.7007	1.1048	1.8959	0.5064
9712	TAG56:7-FA22:4	Triacylglycerol	TAG Ester	54084	GC-FID	100010232		0.4537	0.8382	1.8987	0.9723	2.1615	1.023	0.5389	1.4367	1.0307	7.2596	0.8799	1.0677	0.6975	1.9374	0.977	0.6444	0.9735	1.3848	1.1499	0.608	2.0006	1.2668	1.2864	1.1863	0.9449	1.91	0.3541
9719	TAG56:8-FA16:1	Triacylglycerol	TAG Ester	54085	GC-FID	100010233		0.5936	0.6491	2.8871	1.0617	1.7293	1.4985	0.998	1.0535	0.9177	4.9347	0.8479	1.2232	0.3792	3.093	2.0153	1.5305	0.6317	1.002	1.0059	0.7291	2.9589	0.6449	0.6658	0.6409	1.1428	2.1071	0.3201
9774	TAG57:2-FA18:1	Triacylglycerol	TAG Ester	54086	GC-FID	100010234		0.7581	1.039	3.3013	0.7514	2.018	1.443	1.3434	1.2236	1.2385	11.2126	0.8263	1.023	0.5097	2.53	1.6587	1.7122	0.9333	0.977	0.8854	0.5591	3.0109	0.4529	0.619	0.539	0.9762	2.2942	0.4256
9885	TAG58:10-FA20:5	Triacylglycerol	TAG Ester	54087	GC-FID	100010235		0.4213	1.145	2.3836	0.6424	1.8466	0.4701	0.8257	1.5969	0.4129	16.4402	0.5689	0.591	0.9285	2.6554	2.5358	2.7022	1.1073	1.3719	0.3394	0.4148	1.9766	0.87	0.4941	0.498	1.0735	2.2672	0.303
10014	TAG58:8-FA20:3	Triacylglycerol	TAG Ester	54088	GC-FID	100010236		0.4747	1.3572	1.4816	0.7121	2.6392	0.6858	0.8257	1.5874	0.5465	8.7851	0.861	0.7659	1.139	1.8152	1.1127	0.6816	1.2676	1.4966	0.9901	0.7414	1.5922	1.716	0.7163	0.7037	1.2048	1.8583	0.6284
10026	TAG58:9-FA18:1	Triacylglycerol	TAG Ester	54089	GC-FID	100010237		0.7607	0.9482	3.2037	0.7829	1.85	1.4112	1.2811	1.2479	1.0348	10.6681	0.7502	1.133	0.4755	2.8002	1.6525	1.7175	0.7747	0.9652	0.8454	0.5085	3.0074	0.4412	0.5457	0.4412	1.082	2.1161	0.405
10146	TAG60:11-FA22:5	Triacylglycerol	TAG Ester	54090	GC-FID	100010238		0.5531	0.7697	4.9048	0.7283	2.7379	1.5407	1.2428	1.4	0.4786	9.6552	1.1352	1.0055	0.7503	3.6993	0.9945	2.0538	1.0138	1.3683	0.6028	0.6359	4.2717	0.7076	0.4786	0.4221	1.4621	3.0317	0.5917
7930	CE(17:0)	Cholesterol Ester	CE Ester	54122	GC-FID	100010270		1.1263	0.897	0.9019	0.8532	0.6636	0.7484	1.0478	0.6841	2.412	1.855	0.8158	0.8988	1.0819	0.9264	0.5831	1.1123	1.1421	1.4648	0.834	0.7781	1.6595	1.582	0.9165	0.7483	1.3099	1.5317	0.9522
7931	CE(18:0)	Cholesterol Ester	CE Ester	54123	GC-FID	100010271		1.095	1.1328	0.7666	0.7763	0.6878	0.7448	0.9234	0.7509	1.6899	1.8702	0.9097	0.8923	0.8104	0.6958	0.5475	1.1401	1.0735	1.0685	0.7493	1.003	1.2012	1.1859	1.0155	0.8784	1.5651	1.3679	0.8662
7945	CE(22:4)	Cholesterol Ester	CE Ester	54124	GC-FID	100010272		0.835	0.9298	0.883	0.953	0.7073	0.8839	1.09	0.776	1.0074	1.513	1.1276	0.8445	1.1912	0.6614	0.3761	1.0302	1.553	1.0881	0.6857	1.0335	1.5346	1.9653	1.1935	0.9964	1.0512	1.6734	1.0036
7948	CE(24:0)	Cholesterol Ester	CE Ester	54125	GC-FID	100010273		0.8881	0.9998	0.9372	1.0043	0.5622	0.989	0.9917	1.0124	1.3599	1.7101	0.9084	0.8994	0.9021	1.0416	0.5087	1.1177	1.4967	1.3815	0.8566	0.8778	1.4346	0.9264	0.8575	0.9336	1.5381	2.2804	1.0002
7949	CE(24:1)	Cholesterol Ester	CE Ester	54126	GC-FID	100010274		1.1297	1.3678	1.3307	0.9425	0.6886	1.0252	1.0632	0.9754	1.7826	1.5176	0.8709	1.1013	0.9443	0.6029	0.6216	0.9851	1.574	0.9319	1.0149	0.9564	1.1366	0.8368	0.7774	1.0195	1.2018	1.312	0.7242
7958	CER(22:1)	Sphingolipids	Ceramide	54127	GC-FID	100010275		1.2067	0.932	1.0236	1.1151	1.0763	0.699	1.1789	0.6824	1.9445	2.1664	0.7906	0.8627	0.9875	0.6768	0.7545	0.9237	1.2233	1.1456	0.663	0.9792	1.1956	1.2178	1.2122	1.0014	1.6893	1.62	0.8072
8031	DAG(14:0/18:2)	Diacylglycerol	DAG Ester	54128	GC-FID	100010276		0.5222	0.5903	3.0124	0.7514	1.5064	0.9667	0.6261	1.059	1.9476	8.3632	1.6803	0.7891	0.8609	0.9993	0.7891	0.5463	1.1391	0.9074	0.8425	0.5804	2.7188	1.81	1.8718	1.6496	1.0007	1.3134	0.3874
8065	DAG(16:1/18:0)	Diacylglycerol	DAG Ester	54129	GC-FID	100010277		1.016	0.9961	0.9892	1.0886	1.5262	0.9849	0.7047	1.2123	1.8833	3.9628	1.5512	0.8145	0.9909	0.8465	0.8033	0.8457	1.0039	0.9287	0.7869	1.1665	1.1146	1.7311	1.1751	1.4016	1.2979	1.0826	0.6814
8066	DAG(16:1/18:1)	Diacylglycerol	DAG Ester	54130	GC-FID	100010278		0.5309	1.1101	1.0283	0.9691	1.9442	1.0997	0.5723	1.1921	1.2333	5.0941	1.6362	0.9995	0.7349	0.6757	1.4289	0.3032	0.8371	1.0397	0.7577	0.9287	1.2279	2.4698	1.2472	1.2625	1.0005	0.8827	0.2651
8070	DAG(16:1/20:2)	Diacylglycerol	DAG Ester	54131	GC-FID	100010279		0.5993	0.8879	0.9412	1.03	1.6127	0.7303	0.626	0.9789	1.5527	5.5916	1.0277	0.9634	1.0289	0.7192	0.8502	0.7503	1.1576	1.091	0.8246	1	1.273	1.384	1.4451	1.2608	0.7469	1.5128	0.6948
8095	DAG(18:2/20:3)	Diacylglycerol	DAG Ester	54132	GC-FID	100010280		0.519	1.2467	1.8211	0.8986	2.7937	1.1078	0.585	1.6721	0.8475	7.5981	0.8006	0.8395	1.0019	1.111	0.642	0.8885	1.0828	1.2233	1.786	0.9981	1.7929	1.8887	1.0258	0.766	0.7809	2.0783	0.2837
8098	DAG(18:2/22:4)	Diacylglycerol	DAG Ester	54133	GC-FID	100010281		0.6728	0.6058	1.4798	0.9156	1.5283	0.911	0.5896	1.2393	1.4821	3.4104	0.9642	0.8786	0.9249	1.2116	0.5087	1.0012	1.5329	1.5977	1.3295	0.7584	2.1295	1.9584	0.9988	0.7491	0.7931	1.7896	0.7977
7969	DCER(16:0)	Sphingolipids	Dihydroceramide	54134	GC-FID	100010282		0.6951	1.0378	0.7244	0.6341	0.8829	0.7293	1.0415	1.0902	1.2622	2.3671	0.7232	0.9854	1.0256	0.772	0.9354	1.0354	1.3012	0.7171	0.65	1.0146	0.7878	1.2537	1.0963	0.7671	1.1159	1.0439	0.8634
7896	FFA(15:0)	Free Fatty Acids	Saturated FFA	54135	GC-FID	100010283		1.138	0.8923	1.056	0.7762	1.0087	1.4313	1.1179	1.1544	0.8317	0.7597	0.8146	0.9977	1.0972	1.0803	1.0706	0.9707	0.8986	1.1937	0.9772	1.024	1.0023	1.4696	0.8682	0.9085	0.9363	0.9891	1.092
7907	FFA(16:1)	Free Fatty Acids	Monounsaturated FFA	54136	GC-FID	100010284		0.4813	0.8307	0.5104	0.6272	1.8174	3.6293	0.894	0.8559	0.4063	0.8398	0.9424	0.987	1.2959	7.0684	0.8122	1.3608	0.6701	1.8668	1.013	1.871	2.6187	4.3442	1.1947	1.1927	1.1985	1.4043	1.8541
7916	FFA(20:2)	Free Fatty Acids	Polyunsaturated FFA (PUFA)	54137	GC-FID	100010285		0.6344	1.1394	0.8621	0.8269	1.2721	1.7507	0.9235	1.2284	0.7122	0.9438	0.8075	0.8161	1.1732	0.8184	0.7896	1.7835	1.0839	1.3233	1.1054	1.5602	1.2707	1.852	0.9629	0.9982	1.0018	1.2302	1.5024
7917	FFA(20:3)	Free Fatty Acids	Polyunsaturated FFA (PUFA)	54138	GC-FID	100010286		0.6577	1.1319	0.8949	0.7046	1.4013	1.5289	1.0039	1.3457	0.6148	0.9655	0.9115	0.9658	0.9961	0.8503	0.9211	1.4081	1.0664	1.2131	0.9801	1.327	1.2156	1.5938	0.9894	1.0081	1.0295	1.1628	1.1666
7903	FFA(22:0)	Free Fatty Acids	Saturated FFA	54139	GC-FID	100010287		0.8566	0.9457	1.0462	1.125	1.1296	1.0409	0.9963	1.1619	0.7977	0.8033	0.9601	0.9002	1.0874	0.8761	0.8181	1.1926	1.0493	0.9997	0.9632	1.2242	1.0426	1.0142	0.8925	1.0003	1.0361	1.081	1.1831
7911	FFA(24:1)	Free Fatty Acids	Monounsaturated FFA	54140	GC-FID	100010288		0.8377	1.1046	1.2045	1.152	1.0451	1.0054	1.0709	0.9205	1.0321	0.8653	1.143	0.9326	1.132	0.7835	0.8951	1.2623	0.9912	1.0625	0.9946	1.236	0.8744	0.8285	0.8965	1.1109	0.9283	1.0176	0.9054
7994	LCER(16:0)	Sphingolipids	Lactosylceramide	54141	GC-FID	100010289		1.3246	1.094	0.8725	0.9563	0.5028	0.7416	1.7026	1.0059	1.4959	0.6638	0.7517	0.9941	1.1806	0.6397	0.3269	1.3986	1.4115	1.1397	1.0592	1.2524	0.9773	1.1696	0.8414	0.8756	0.8562	1.1395	1.2436
8000	LCER(22:1)	Sphingolipids	Lactosylceramide	54142	GC-FID	100010290		1.2785	0.9232	0.6272	1.2127	0.5504	0.6952	1.5965	0.9364	1.5219	0.9408	0.6667	0.8925	0.8136	0.7675	0.761	1.3487	1.1798	0.9803	0.8509	1.2018	0.9013	0.8662	1.0197	1.0965	1.1053	1.0899	1.0811
6967	LPC(17:0)	Lysophosphatidylcholine	LPC Ester	54143	GC-FID	100010291		1.0828	1.1566	0.9076	0.8618	0.73	0.7099	0.9585	1.066	1.2902	1.0415	0.7156	0.6818	1.0799	1.1884	1.0966	0.9148	0.9095	1.1166	0.9381	0.9215	1.3703	1.3109	0.8283	0.8691	0.6658	1.4238	0.9308
6968	LPC(18:0)	Lysophosphatidylcholine	LPC Ester	54144	GC-FID	100010292		0.9368	0.8459	0.9842	0.8564	0.8999	0.6578	0.9066	1.0713	1.0051	1.1049	0.6797	0.7976	1.1299	0.8636	0.9949	1.0736	0.9942	0.9599	0.8882	1.0837	1.242	1.2002	1.122	1.13	1.0925	1.5995	0.9308
6969	LPC(18:1)	Lysophosphatidylcholine	LPC Ester	54145	GC-FID	100010293		1.6425	1.5895	0.6957	0.9559	0.8993	0.5052	1.0886	1.1771	0.9393	0.8359	0.7102	0.703	1.3112	1.0441	1.8832	0.8424	0.7679	0.9296	0.6918	1.0705	0.7005	1.0623	0.8315	0.7737	1.1561	1.0766	1.3053
6976	LPC(20:3)	Lysophosphatidylcholine	LPC Ester	54146	GC-FID	100010294		1.0609	1.0054	0.9601	0.716	1.2892	0.5402	1.0574	2.3079	0.7127	0.9946	1.4941	0.8092	1.0782	0.9271	1.5815	0.6314	0.7277	0.8467	0.6402	1.2907	0.9466	1.6822	0.7881	0.7532	1.3323	1.1515	0.8107
7223	LPE(16:1)	Lysophosphatidylethanolamine	LPE Ester	54147	GC-FID	100010295		0.8555	0.9287	0.7823	0.5742	1.0751	0.501	0.5549	1.684	0.9518	1.1561	1.8266	0.7168	1.9692	0.8247	1.7919	0.501	0.8979	1.1175	0.6089	1.3179	0.8863	3.5106	1.2987	1.4104	1.3526	0.7399	0.9249
6757	PC(14:0/16:1)	Phosphatidylcholine	PC Ester	54151	GC-FID	100010299		0.5509	0.5509	0.5509	0.5509	0.5509	0.5509	0.5509	0.5509	0.5509	1.1048	0.5509	0.5509	0.5509	0.5509	0.5509	0.5509	0.5509	0.5509	0.5509	0.5509	0.5509	1.0233	0.5509	0.5509	0.5509	0.5509	0.5509
6759	PC(14:0/18:2)	Phosphatidylcholine	PC Ester	54152	GC-FID	100010300		1.1028	0.509	1.4835	0.7881	0.6113	0.5231	0.846	0.6886	1.4011	1.5731	0.9577	0.8336	0.8389	0.6348	0.5872	1.3577	1.1012	1.4205	1.0228	0.9016	1.4797	0.9772	1.6155	1.3789	1.1894	1.1742	0.6262
6775	PC(15:0/18:2)	Phosphatidylcholine	PC Ester	54154	GC-FID	100010302		1.2179	0.6529	0.8052	0.9595	0.4406	0.4856	0.9995	0.67	2.0212	1.2724	0.9268	1.0005	0.9285	0.6811	0.5139	1.0857	1.135	1.4657	0.9165	0.6889	1.0655	1.37	1.3194	1.2683	0.5664	1.0621	0.8512
6788	PC(16:0/18:0)	Phosphatidylcholine	PC Ester	54157	GC-FID	100010305		0.9957	1.0292	1.1192	0.7717	0.9398	0.7191	0.8536	0.7642	1.1432	1.3179	1.0181	0.9991	0.8668	0.6357	0.6856	0.9167	1.0819	1.0443	0.7451	1.0009	0.961	1.1524	1.2017	1.2891	1.0715	1.2391	0.7895
6796	PC(16:0/20:4)	Phosphatidylcholine	PC Ester	54158	GC-FID	100010306		0.675	1.3578	1.0767	1.0835	1.6988	0.9723	1.1052	0.7793	0.7685	2.7835	1.3504	1.1838	0.9435	1.0145	0.8267	0.8868	1.0805	1.4373	0.833	0.8107	1.191	1.2641	0.9047	0.8818	0.8624	1.6246	0.9786
6797	PC(16:0/20:5)	Phosphatidylcholine	PC Ester	54159	GC-FID	100010307		0.6586	1.6125	1.8966	0.6936	1.0116	0.5874	1.012	0.6668	0.6993	3.1691	0.9665	1.094	0.571	0.8858	1.9273	2.3758	0.9884	1.5811	0.2711	0.7604	1.453	0.9283	0.6406	0.5672	1.1608	1.6293	0.4149
6800	PC(16:0/22:4)	Phosphatidylcholine	PC Ester	54161	GC-FID	100010309		0.5392	1.0034	1.1053	0.9451	1.0285	0.608	0.5792	0.9779	0.9047	1.6257	1.4173	1.0613	0.9689	0.7305	0.4024	0.6127	1.2518	0.9355	0.7363	1.19	1.1471	2.5748	1.2148	0.9177	0.9966	1.0934	1.0704
6805	PC(17:0/18:1)	Phosphatidylcholine	PC Ester	54162	GC-FID	100010310		1.0934	1.243	0.8148	1.0764	0.8202	0.8617	0.9794	0.6865	2.1401	1.7908	0.7878	0.8731	0.9802	1.3261	1.0198	0.9593	1.0969	1.4983	0.8036	0.7251	0.9551	1.7316	0.8903	0.6723	0.8465	1.1336	1.4521
6806	PC(17:0/18:2)	Phosphatidylcholine	PC Ester	54163	GC-FID	100010311		1.0693	0.7039	0.9294	0.9903	0.7193	0.582	0.8924	0.686	1.6013	1.3798	0.7439	0.8738	1.0097	0.8979	0.644	1.1258	1.1129	1.5256	0.7727	0.644	1.5987	1.0868	1.223	1.1575	0.5209	1.2537	0.9714
6821	PC(18:0/18:3)	Phosphatidylcholine	PC Ester	54164	GC-FID	100010312		1.3349	1.3671	0.6854	0.4499	0.8263	0.4474	0.681	1.0399	0.7963	1.9599	0.5859	1.1658	0.9601	0.5755	0.7052	0.4801	1.7488	1.7595	0.4342	1.485	0.9218	1.5267	2.2029	2.4346	1.4338	1.472	0.5706
6823	PC(18:0/20:0)	Phosphatidylcholine	PC Ester	54166	GC-FID	100010314		1.0571	0.8518	1	0.6479	0.6479	0.9737	1.0801	0.6479	0.8802	0.9308	0.6479	1.552	0.6479	0.9187	0.8183	1.0266	0.9807	1.271	0.6479	1.4588	1.3297	0.6479	0.6479	0.8511	1.0082	1.0892	1.0256
6827	PC(18:0/20:4)	Phosphatidylcholine	PC Ester	54167	GC-FID	100010315		0.704	0.9023	1.0099	1.1366	1.4714	0.919	1.0466	0.8225	0.6827	2.2721	1.0361	1.0661	0.849	1.1553	0.8258	1.0148	1.2323	1.6674	0.9483	0.8322	1.3825	1.1009	0.9768	0.9649	0.9754	1.8381	0.9941
6828	PC(18:0/20:5)	Phosphatidylcholine	PC Ester	54168	GC-FID	100010316		0.7536	1.2072	1.9569	0.9988	0.9727	0.6537	0.9662	1.0012	0.7177	2.772	0.7913	0.9747	0.6546	1.121	1.9133	2.4242	1.2744	2.0124	0.3846	0.9117	1.8385	0.9443	0.7682	0.781	1.5966	1.8754	0.5855
6833	PC(18:0/22:6)	Phosphatidylcholine	PC Ester	54170	GC-FID	100010318		0.6576	0.8732	1.5548	0.7828	0.9999	0.9433	0.9785	1.1595	0.8374	1.319	1.2133	1.225	0.7133	1.3995	0.8167	1.2899	1.346	1.4864	0.7001	0.8421	2.1089	0.6418	1.0171	1.0622	1.3422	2.4947	0.9186
6841	PC(18:1/20:2)	Phosphatidylcholine	PC Ester	54171	GC-FID	100010319		1.094	1.0359	0.9134	0.9142	0.5609	0.8695	0.8563	0.8464	1.2066	0.4769	0.9965	1.2896	0.9681	0.4769	0.7974	1.0163	1.1826	1.0838	0.8696	1.369	0.6362	1.2869	1.3533	1.1573	1.2689	1.4122	0.6241
6843	PC(18:1/20:4)	Phosphatidylcholine	PC Ester	54172	GC-FID	100010320		1.2802	1.3082	0.9042	1.704	1.2291	0.728	1.2494	0.5462	0.7877	1.9757	1.0037	1.309	0.9746	0.9963	0.9361	1.0617	1.1324	1.5922	1.0288	0.9821	0.8702	0.9402	0.8721	0.8158	1.03	1.3689	0.9549
6851	PC(18:2/16:1)	Phosphatidylcholine	PC Ester	54173	GC-FID	100010321		1.479	0.7621	0.9877	1.3037	0.8054	0.6518	0.8671	0.681	1.386	1.2041	1.0271	0.918	0.8659	0.6955	0.6777	1.5288	0.9192	1.3622	1.2233	1.0123	0.9774	0.9468	1.5238	1.3622	1.1321	1.3256	0.8033
6873	PC(20:0/20:3)	Phosphatidylcholine	PC Ester	54175	GC-FID	100010323		0.6343	0.6343	0.6343	0.6343	0.6343	0.6343	0.6343	0.6343	0.6343	0.6343	0.9666	1.0334	0.6343	0.6343	0.6343	0.6343	0.6343	0.6343	0.6343	0.6343	0.6343	1.2002	0.6343	0.6343	0.6343	0.6343	0.6343
7035	PE(16:0/18:3)	Phosphatidylethanolamine	PE Ester	54183	GC-FID	100010331		0.4159	0.4159	0.4159	0.4159	0.4159	0.4159	0.4159	0.4159	0.4159	1.0505	0.4159	0.4159	0.4159	0.4159	0.6663	0.4159	0.4159	0.4159	0.4159	0.4159	0.4159	0.4159	1.5573	1.9833	0.4159	0.4159	0.4159
7082	PE(18:0/20:5)	Phosphatidylethanolamine	PE Ester	54192	GC-FID	100010340		0.6905	1.158	1.3904	0.665	0.883	1.0128	0.6315	0.7411	0.6295	1.8431	0.7206	1.4005	0.6118	0.6549	2.0291	0.8172	1.1559	1.2763	1.031	0.6325	1.1253	1.1641	0.7536	0.9872	1.2057	0.9683	1.1575
7087	PE(18:0/22:6)	Phosphatidylethanolamine	PE Ester	54193	GC-FID	100010341		0.3149	1.5494	2.5234	0.5602	2.7662	1.1659	0.9421	1.3722	0.7657	3.8278	1.4471	1.3594	0.3923	1.7618	1.4466	0.937	0.9779	1.6782	0.4452	0.5032	2.2514	0.5018	0.6866	0.7818	0.9563	3.0804	0.4207
7092	PE(18:1/18:3)	Phosphatidylethanolamine	PE Ester	54194	GC-FID	100010342		0.8074	0.5125	0.5125	0.5125	0.5125	0.5125	0.5125	0.5125	0.5125	1.0902	0.5125	0.5125	0.5125	0.5125	0.5125	0.5125	0.5125	0.5125	0.5125	0.5125	0.5125	0.5125	1	1.6563	0.5125	0.5125	0.5125
7096	PE(18:1/20:3)	Phosphatidylethanolamine	PE Ester	54195	GC-FID	100010343		1.1477	1.2498	0.9793	0.666	1.1921	0.5762	0.6266	0.5762	1.0455	1.4593	1.1742	0.8737	0.8138	0.5762	1.0575	1.181	1.1648	1.0408	0.7891	0.828	0.9652	0.9716	0.7373	0.7925	1.0207	1.1896	0.5976
7150	PE(O-18:0/20:4)	Phosphatidylethanolamine	PE Ether	54203	GC-FID	100010351		1.1256	0.8521	0.7888	1.2231	1.0432	1.1436	0.9372	0.6113	0.5809	1.8432	1.3204	0.6759	0.7468	0.6523	0.506	0.7863	1.5723	1.325	0.7401	1.5123	0.9091	0.9568	0.8613	0.7842	1.0961	1.4341	1.6136
7151	PE(O-18:0/20:5)	Phosphatidylethanolamine	PE Ether	54204	GC-FID	100010352		0.8924	0.8924	0.8924	0.8924	0.8924	0.8924	0.8924	0.8924	0.8924	0.8924	0.8924	0.8924	0.8924	0.8924	0.8924	1	0.8924	0.8924	0.8924	0.8924	0.8924	0.8924	0.8924	0.8924	0.8924	1.2016	0.8924
7175	PE(P-16:0/22:4)	Phosphatidylethanolamine	PE Plasmalogen	54206	GC-FID	100010354		0.881	0.9133	0.5866	0.872	0.7254	0.5792	1.033	0.7752	1.0157	1.5525	0.9843	1.0566	1.5457	0.516	0.3646	0.9576	1.2544	1.082	0.6688	0.9685	0.9509	1.8262	1.4877	1.4405	1.2263	1.1617	1.0831
7178	PE(P-16:1/18:1)	Phosphatidylethanolamine	PE Plasmalogen	54207	GC-FID	100010355		1	1	1	1	1	1	1	1	1	1	1	1	1	1	1	1	1	1	1	1	1	1	1	1	1	1	1
7191	PE(P-18:0/20:5)	Phosphatidylethanolamine	PE Plasmalogen	54208	GC-FID	100010356		1.8491	0.887	1.4047	0.7414	0.7186	0.7708	0.6803	0.6821	0.8186	2.2926	0.5787	0.88	0.7141	1.0513	1.3226	1.2378	1.4906	2.5473	0.7771	1.3919	1.7094	0.8228	0.9039	0.9487	2.6264	1.944	1.4971
7196	PE(P-18:0/22:6)	Phosphatidylethanolamine	PE Plasmalogen	54209	GC-FID	100010357		1.1615	1.1144	1.145	0.689	0.9729	0.9932	0.8203	1.0404	0.6207	2.1597	0.6983	0.7869	0.5333	1.045	0.6166	1.1329	1.1172	1.4502	0.7043	0.9266	1.4962	0.5335	0.6377	0.6468	1.3983	1.9825	1.0068
7201	PE(P-18:1/18:1)	Phosphatidylethanolamine	PE Plasmalogen	54210	GC-FID	100010358		1.7267	1.4154	0.5808	0.7718	0.7276	0.545	0.9951	0.8337	1.0031	1.75	0.8297	1.0355	0.8438	0.5345	1.1235	1.0694	0.9969	1.6085	0.6309	1.0283	0.6768	1.1235	0.6832	0.6602	1.2911	0.7718	1.4167
7202	PE(P-18:1/18:2)	Phosphatidylethanolamine	PE Plasmalogen	54211	GC-FID	100010359		2.2344	0.9498	0.6569	0.8923	0.703	0.8588	0.8452	0.8801	1.4287	1.3639	0.4989	0.7491	0.936	0.5698	0.7338	1.998	1.9122	1.6381	0.7808	1.6828	0.8451	1.3612	1.244	0.92	1.8666	1.1779	1.8674
7215	PE(P-18:2/18:2)	Phosphatidylethanolamine	PE Plasmalogen	54214	GC-FID	100010362		0.7494	0.7494	0.7494	0.7494	0.7494	0.7494	0.7494	0.811	0.7494	0.7494	0.7494	0.7494	0.7494	0.7494	0.7494	1.1095	1.1167	0.7494	0.7494	0.7494	0.7494	0.8382	1.2721	0.7494	1.0244	1.149	0.8007
7216	PE(P-18:2/20:4)	Phosphatidylethanolamine	PE Plasmalogen	54215	GC-FID	100010363		1.0284	0.6321	0.8472	0.8693	0.9714	0.7526	0.6321	0.6321	0.7061	1.2908	0.6321	0.6321	0.6321	0.8928	0.6321	1.3591	1.5533	1.4592	0.6321	0.9307	1	0.7807	1.0331	1.0336	0.9327	1.0567	1.5561
7511	PI(16:0/22:6)	Phosphatidylinositol	PI Ester	54217	GC-FID	100010365		0.9888	0.9888	1.0112	0.9888	0.9888	0.9888	0.9888	0.9888	0.9888	0.9888	0.9888	0.9888	0.9888	0.9888	0.9888	0.9888	0.9888	0.9888	0.9888	0.9888	0.9888	0.9888	0.9888	0.9888	0.9888	0.9888	0.9888
7535	PI(18:0/18:2)	Phosphatidylinositol	PI Ester	54218	GC-FID	100010366		1.1066	0.756	1.2455	1.0138	0.6432	0.8297	0.9862	0.6268	0.7993	1.4859	0.8937	1.3055	0.9177	0.4425	0.4358	1.5768	1.4547	0.8933	1.2329	1.3991	0.841	1.5443	1.8604	1.4616	0.8969	1.56	0.6944
7546	PI(18:0/22:6)	Phosphatidylinositol	PI Ester	54219	GC-FID	100010367		0.7587	1.3363	1.3021	0.5507	1.5845	1.2112	0.6826	0.9568	0.5507	0.5507	0.5507	0.9346	0.5507	0.5507	0.5507	0.5507	0.8352	0.5507	0.6485	0.8996	1.5994	0.5507	0.5507	0.5507	1.316	1.5328	0.5507
7548	PI(18:1/16:1)	Phosphatidylinositol	PI Ester	54220	GC-FID	100010368		1.2975	0.6221	0.9687	1.2713	0.8656	0.6221	0.9772	0.6221	0.6221	0.6221	1.0228	1.1065	0.9594	0.6221	0.6221	0.6221	0.6221	1.1285	0.6221	0.6221	0.7861	1.47	1.1927	0.9265	0.6221	0.896	0.6221
7556	PI(18:1/20:4)	Phosphatidylinositol	PI Ester	54221	GC-FID	100010369		1.2426	1.088	0.9142	1.9589	0.8132	0.4896	1.0448	0.5099	1.2754	1.1939	0.8619	1.5174	1.411	0.6635	0.7639	1.2239	0.8552	0.8553	1.1083	0.9529	0.8098	1.15	1.4163	1.5635	1.3728	0.859	0.9484
8005	SM(14:0)	Sphingolipids	Sphingomyelin	54222	GC-FID	100010370		1.034	1.0059	0.7961	0.8141	0.8194	0.6802	0.9086	0.7307	1.6063	1.8166	0.932	0.9308	1.2095	0.7688	0.6007	1.0022	0.9978	1.6277	0.5874	0.8351	1.0417	1.1613	1.1805	1.1678	0.7708	1.1271	0.8406
8440	TAG42:1-FA18:1	Triacylglycerol	TAG Ester	54223	GC-FID	100010371		1.5045	0.3493	3.3646	0.9017	1.5639	0.1137	1.2701	0.8167	13.6028	9.5709	10.9253	0.1679	0.7101	0.3301	2.5351	0.1156	0.6009	0.5562	0.1481	0.2184	1.0983	1.7931	3.9074	3.1264	0.2778	0.2605	0.3736
8488	TAG44:2-FA14:0	Triacylglycerol	TAG Ester	54224	GC-FID	100010372		0.7185	0.2323	5.7133	0.8946	1.2187	0.2923	0.7728	1.5176	8.5124	9.9981	11.9859	0.2389	1.1054	0.5593	2.6089	0.3166	0.8609	0.6941	0.4862	0.4197	3.5728	1.9681	4.0037	3.3677	0.5686	0.74	0.3569
8492	TAG44:2-FA18:1	Triacylglycerol	TAG Ester	54225	GC-FID	100010373		1.9036	0.5228	2.509	0.8202	2.235	0.1846	1.1162	1.1672	8.6872	11.2302	1.7997	0.2576	0.5115	0.5808	1.2844	0.1902	0.8838	0.6469	0.2356	0.3452	0.8636	2.0277	3.3846	3.1528	0.4031	0.4372	0.1795
8493	TAG44:2-FA18:2	Triacylglycerol	TAG Ester	54226	GC-FID	100010374		0.9056	0.2881	5.4337	0.7261	1.9779	0.3434	1.0551	1.5886	9.1846	12.9416	6.9629	0.2479	0.8715	0.606	1.8451	0.2397	0.9449	0.6908	0.4032	0.3311	2.5679	2.0885	4.6286	4.1299	0.5548	0.7859	0.2143
8548	TAG46:1-FA14:1	Triacylglycerol	TAG Ester	54227	GC-FID	100010375		1.5228	1.1383	1.2513	0.661	1.1138	0.7381	0.7844	1.1601	2.2736	2.3757	1.4929	0.8529	0.812	1.2079	0.762	0.7333	0.8545	0.475	0.8162	0.6789	1.0201	1.2411	0.9827	1.1092	1.2268	0.7597	0.4399
8604	TAG47:0-FA14:0	Triacylglycerol	TAG Ester	54228	GC-FID	100010376		0.6879	0.3433	3.6582	0.4667	1.034	0.3816	1.1972	1.1206	13.1489	13.0255	3.3546	0.5149	0.7404	0.583	0.6397	0.339	0.966	0.8809	0.2142	0.6355	2.2908	3.3872	2.8071	2.6057	1.2525	0.7362	0.3319
8605	TAG47:0-FA15:0	Triacylglycerol	TAG Ester	54229	GC-FID	100010377		0.6797	0.4866	2.6833	0.4996	1.2176	0.35	1.1417	1.3666	9.9624	14.0644	3.5907	0.6168	0.8915	0.5163	0.5213	0.2827	0.9479	0.8178	0.2791	0.4787	1.5076	3.6941	2.6204	2.3153	1.0521	0.6428	0.3536
8625	TAG47:2-FA15:0	Triacylglycerol	TAG Ester	54230	GC-FID	100010378		0.6704	0.348	3.4471	0.7321	0.7887	0.5504	0.8744	1.3108	5.1822	7.5559	1.8217	0.7484	0.6318	0.9816	0.7407	0.3498	1.1033	1.0184	0.7167	0.5632	2.2006	2.5238	2.5058	2.4749	0.6498	1.075	0.2778
8664	TAG48:1-FA14:1	Triacylglycerol	TAG Ester	54231	GC-FID	100010379		0.7767	0.6653	2.1391	0.6149	1.695	0.4359	0.7263	1.2924	4.9248	8.8369	2.8142	0.6913	0.6425	0.562	0.8654	0.1553	0.9988	1.1053	0.4034	0.5986	1.5413	2.9671	2.571	2.488	1.0012	0.7328	0.2464
8699	TAG48:3-FA18:2	Triacylglycerol	TAG Ester	54232	GC-FID	100010380		0.5932	0.3869	2.7777	0.8211	1.4833	0.7405	0.5556	1.4357	2.5482	6.6055	2.9667	0.7104	0.777	0.847	1.6021	0.453	1.0081	0.9612	1.1561	0.6425	2.7705	1.7869	2.2832	2.071	0.7685	1.4165	0.2571
8752	TAG49:1-FA14:0	Triacylglycerol	TAG Ester	54233	GC-FID	100010381		0.6469	0.5194	2.2846	0.582	1.1873	0.4299	0.5989	0.8831	6.0978	11.4568	2.1983	0.6259	0.6702	0.7099	1.0215	0.2184	1.0119	1.2088	0.3495	0.5975	2.2298	2.3413	2.1307	1.7688	0.9881	0.8739	0.4217
8769	TAG49:2-FA16:0	Triacylglycerol	TAG Ester	54234	GC-FID	100010382		0.4695	0.4776	2.2801	0.7146	1.1216	0.7592	0.5886	1.2007	3.1692	9.2737	1.7077	0.8398	0.7871	0.9149	0.6342	0.3279	1.0902	1.283	0.505	0.5793	2.2962	2.5496	2.2519	1.9954	0.9668	1.2939	0.3849
8820	TAG50:0-FA16:0	Triacylglycerol	TAG Ester	54235	GC-FID	100010383		0.3961	1.2097	1.7016	0.7092	2.5872	0.6763	0.5243	1.212	3.5668	17.7855	3.68	0.762	0.9459	0.6785	0.8174	0.1987	0.9441	0.834	0.2074	0.5329	1.6504	2.3956	2.2394	1.9215	1.5017	1.0541	0.3896
8832	TAG50:1-FA16:1	Triacylglycerol	TAG Ester	54236	GC-FID	100010384		0.4343	1.0626	1.1626	0.7401	2.235	0.8853	0.5296	1.4003	2.0802	11.3377	3.1109	0.9484	0.7345	0.742	1.2231	0.2125	0.961	1.039	0.3867	0.7039	1.619	3.0114	2.2207	1.9762	1.4751	1.1305	0.4389
8834	TAG50:1-FA18:0	Triacylglycerol	TAG Ester	54237	GC-FID	100010385		0.6733	0.8915	1.6075	0.6798	1.9121	0.6243	0.605	1.0805	3.6648	12.2318	2.661	0.6965	0.6399	0.6788	1.1783	0.2112	0.986	0.9239	0.3669	0.6492	1.787	2.2516	2.1342	1.9394	1.2156	1.014	0.388
8854	TAG50:2-FA20:2	Triacylglycerol	TAG Ester	54238	GC-FID	100010386		0.373	0.4278	3.0132	0.4268	1.6982	0.5722	0.4512	0.9878	3.1077	9.2348	3.7043	0.7642	1.0955	0.937	0.8618	0.2886	1.4451	0.7693	0.372	0.7622	2.4309	2.6931	1.7805	1.627	1.6189	1.1169	0.3587
8884	TAG50:4-FA20:3	Triacylglycerol	TAG Ester	54239	GC-FID	100010387		0.475	0.6177	2.3424	0.5521	1.9358	0.4622	0.5335	1.2725	1.8588	5.0613	2.7889	0.5506	0.9415	1.0514	1.2825	0.3252	1.1027	1.03	0.97	0.6705	2.0328	2.5036	1.5991	1.5977	0.709	1.214	0.3595
8888	TAG50:5-FA14:0	Triacylglycerol	TAG Ester	54240	GC-FID	100010388		0.5822	0.5102	2.4465	0.7484	1.4724	0.8443	0.7113	0.9805	1.7661	8.8626	0.961	1.2111	0.457	1.6164	1.6968	0.6671	1.2049	1.2285	1.2522	0.6009	2.5176	0.8213	2.6731	2.693	0.9251	1.9956	0.1858
8900	TAG50:5-FA20:5	Triacylglycerol	TAG Ester	54241	GC-FID	100010389		0.6611	0.788	3.9815	0.9431	1.3477	0.8268	0.7272	0.8418	1.0886	9.271	1.2446	0.9793	0.9158	1.7743	1.405	0.8312	0.8391	1.0331	0.6311	0.7519	1.963	1.1	1.0207	1.0286	1.0375	1.3134	0.5324
8936	TAG51:0-FA16:0	Triacylglycerol	TAG Ester	54242	GC-FID	100010390		0.6998	0.6905	1.8395	0.6338	1.6882	0.4736	0.6273	1.1715	4.2582	13.3966	2.296	0.5176	0.7184	0.7249	0.7835	0.2005	0.9915	0.9633	0.2176	0.5098	1.5996	2.495	2.1392	1.8921	1.0724	1.0085	0.4624
8961	TAG51:2-FA15:0	Triacylglycerol	TAG Ester	54243	GC-FID	100010391		0.819	1.4644	1.2962	1.069	1.0287	0.673	0.7162	0.9285	3.2351	7.0898	0.9713	1.376	0.6217	0.8066	1.2172	0.2843	1.1042	1.271	0.6207	0.6778	1.3468	1.4327	1.4549	1.3373	0.6626	1.147	0.5802
8981	TAG51:3-FA18:2	Triacylglycerol	TAG Ester	54244	GC-FID	100010392		0.5182	0.7423	1.6908	1.0163	1.0891	1.0531	0.6554	1.2031	2.5355	7.042	0.8549	1.0659	0.6601	1.191	0.8732	0.4787	0.9837	1.3195	0.9581	0.6632	2.0743	1.6717	1.7138	1.5078	0.6975	1.6098	0.4366
8990	TAG51:4-FA16:1	Triacylglycerol	TAG Ester	54245	GC-FID	100010393		0.4558	0.4267	1.45	0.9991	1.1586	1.0009	0.5214	1.2113	1.4969	3.9517	0.9571	0.9522	0.5282	1.109	1.2301	0.4339	0.7033	1.0634	1.067	0.6912	1.87	1.811	1.5751	1.4678	0.7435	1.3901	0.2574
9075	TAG52:3-FA18:0	Triacylglycerol	TAG Ester	54246	GC-FID	100010394		0.6043	0.991	1.2591	0.8923	1.9556	1.009	0.5299	1.256	1.6987	9.5833	1.2747	0.9758	0.5038	0.9328	1.3643	0.5199	0.9276	1.0184	0.7565	0.6517	1.8225	1.4944	2.5534	2.2755	1.0711	1.5475	0.3388
9077	TAG52:3-FA18:2	Triacylglycerol	TAG Ester	54247	GC-FID	100010395		0.3949	1.0932	1.4233	0.9762	1.6743	1.2436	0.5541	1.1316	1.6524	6.2739	0.9551	1.106	0.6494	1.0413	0.9446	0.6297	0.963	1.0238	0.8963	0.6743	1.7302	1.1256	1.4521	1.3619	0.9569	1.6994	0.4341
9081	TAG52:3-FA20:2	Triacylglycerol	TAG Ester	54248	GC-FID	100010396		0.3881	0.7879	1.5649	0.8495	1.7878	0.928	0.4562	1.2503	1.9374	6.2512	1.9518	0.9481	0.8471	1.0041	0.9959	0.421	1.0111	1.1218	0.7871	0.877	2.161	2.0247	1.4491	1.3573	1.0539	1.43	0.3443
9088	TAG52:4-FA16:0	Triacylglycerol	TAG Ester	54249	GC-FID	100010397		0.3565	0.7478	1.9935	0.9708	1.713	1.5916	0.5216	1.2996	1.7213	7.2994	0.7794	1.0065	0.5881	1.2446	0.8579	0.9935	0.9817	1.1288	1.3398	0.6637	2.4111	1.1158	1.8774	1.7477	0.9505	2.2931	0.3232
9106	TAG52:5-FA16:0	Triacylglycerol	TAG Ester	54250	GC-FID	100010398		0.4383	0.8274	1.3548	0.7445	1.9628	1.003	0.5418	1.0572	1.3719	9.1179	0.7101	1.0056	0.4689	1.2574	1.2202	0.4963	1.1119	1.2076	0.8259	0.5681	1.705	0.8826	2.3705	2.0977	0.997	2.252	0.2717
9111	TAG52:5-FA18:2	Triacylglycerol	TAG Ester	54251	GC-FID	100010399		0.3873	0.5392	1.5537	1.0849	1.5959	1.3295	0.4982	1.0232	1.2862	5.8179	0.5391	1.0709	0.3946	1.4237	1.151	0.9768	0.8171	0.9563	1.7243	0.7133	2.127	0.8401	1.9095	1.6866	0.7526	2.1571	0.2308
9138	TAG52:6-FA22:6	Triacylglycerol	TAG Ester	54252	GC-FID	100010400		0.404	0.4375	8.7157	0.4835	1.5077	1.2129	1.0024	1.0464	2.048	11.2992	2.623	0.9976	0.4903	2.3375	1.173	0.6367	0.8625	0.8036	0.4649	0.5137	6.4036	0.7996	1.0891	0.9387	2.2746	1.9984	0.2935
9197	TAG53:2-FA16:0	Triacylglycerol	TAG Ester	54253	GC-FID	100010401		0.7037	1.0442	1.2329	0.8011	1.9243	0.6093	0.5373	1.3607	2.5034	10.7018	2.0589	0.7209	0.8086	0.7581	0.9558	0.241	0.9524	1.1182	0.3617	0.5753	1.3097	1.6927	1.5369	1.4474	0.8449	1.1554	0.4431
9199	TAG53:2-FA17:0	Triacylglycerol	TAG Ester	54254	GC-FID	100010402		0.8602	1.5522	1.0746	0.9676	1.3134	0.7122	0.6133	1.0108	2.4245	8.2447	0.9511	1.0467	0.6037	0.9965	1.4744	0.3088	1.0035	1.2157	0.5928	0.7315	1.3731	1.4108	1.2556	1.2036	0.7076	1.2709	0.587
9211	TAG53:3-FA16:0	Triacylglycerol	TAG Ester	54255	GC-FID	100010403		0.5444	0.8162	1.6394	0.8357	2.1602	0.8655	0.5931	1.6901	2.2456	11.9118	1.9789	0.7816	0.8764	1.1478	0.8848	0.445	1.066	1.258	0.6259	0.7304	2.1785	1.757	2.0652	1.714	0.9347	1.515	0.4726
9229	TAG53:4-FA18:2	Triacylglycerol	TAG Ester	54256	GC-FID	100010404		0.5057	0.5963	1.6594	1.0453	1.1597	1.0913	0.5579	1.0833	1.7816	5.3817	0.5885	0.8489	0.5467	1.4806	0.9547	0.8299	0.8106	1.133	1.2677	0.6404	2.126	1.1097	1.4351	1.2988	0.6029	1.8764	0.4152
9244	TAG53:5-FA18:2	Triacylglycerol	TAG Ester	54257	GC-FID	100010405		0.9248	0.94	1.1102	1.0409	1.0417	1.0359	0.9291	1.0337	1.0757	1.4233	0.9234	1.0203	0.9122	1.035	1.0005	0.9995	0.9978	1.0451	1.1139	0.9772	1.1347	0.9869	0.9884	1.0407	0.9918	1.0948	0.933
9272	TAG53:7-FA18:3	Triacylglycerol	TAG Ester	54258	GC-FID	100010406		0.9518	1.034	0.95	1.0675	0.9482	1.0608	0.8954	1.1128	1.0201	1.2827	1.0098	1.0155	0.9156	0.9663	1.0201	0.9072	0.9355	1.0189	1.0062	0.9706	1.0288	0.8254	0.9389	0.9938	1.0201	1.0563	0.9887
9321	TAG54:2-FA18:0	Triacylglycerol	TAG Ester	54259	GC-FID	100010407		1.1943	2.431	0.976	1.6301	2.2262	0.6664	0.5965	1.0208	2.2995	11.3845	1.1268	0.8873	0.4855	0.6822	1.6937	0.4105	1.0121	0.9732	0.5119	0.8161	1.1236	0.9879	1.5503	1.5108	0.8305	1.1859	0.4958
9335	TAG54:3-FA16:1	Triacylglycerol	TAG Ester	54260	GC-FID	100010408		1.0197	1.3351	1.1086	1.2048	1.6874	0.8441	0.5327	0.9315	1.8443	5.8832	1.4073	1.3061	0.5386	0.7396	2.1192	0.3408	0.8572	1.1074	0.6141	0.9311	1.0471	1.2222	1.0844	1.0467	0.9803	0.9529	0.4532
9343	TAG54:3-FA20:2	Triacylglycerol	TAG Ester	54261	GC-FID	100010409		0.3823	1.24	1.4448	0.7801	1.8142	1.0188	0.5167	1.1238	1.6067	5.8168	1.3489	0.9146	0.791	1.026	0.9219	0.403	1.0064	0.9736	0.6344	0.9301	1.641	1.3933	1.1246	0.9936	1.0878	1.2704	0.4829
9355	TAG54:4-FA18:2	Triacylglycerol	TAG Ester	54262	GC-FID	100010410		0.7157	1.2793	1.1985	1.1151	2.0151	0.9661	0.5475	0.9761	1.8842	8.0528	0.6329	1.0608	0.4543	1.027	1.5182	0.7843	1.0239	0.9343	1.2689	0.7388	1.4187	0.7614	1.4289	1.3034	0.6504	1.7207	0.3354
9358	TAG54:4-FA20:1	Triacylglycerol	TAG Ester	54263	GC-FID	100010411		0.7057	1.005	1.3387	1.1992	1.664	0.9312	0.5053	1.0664	1.8838	6.2875	1.0064	1.1642	0.514	0.9724	1.5925	0.6645	0.9405	1.1604	0.995	0.8479	1.2863	0.8344	1.5155	1.5807	0.9308	1.2811	0.3135
9379	TAG54:5-FA20:4	Triacylglycerol	TAG Ester	54264	GC-FID	100010412		0.4091	1.3119	1.5212	0.7607	2.3658	0.864	0.6464	1.3862	1.0317	9.6637	1.198	0.9384	0.8974	1.7163	1.0041	0.4098	1.1661	1.1909	0.6142	0.5037	1.6028	1.3766	1.1019	0.9959	0.9	1.7662	0.4544
9380	TAG54:5-FA20:5	Triacylglycerol	TAG Ester	54265	GC-FID	100010413		0.3762	1.5022	3.0439	0.606	2.0165	0.7376	0.6612	1.0321	1.03	17.3123	0.97	0.669	0.6077	2.0048	2.1838	1.2911	1.0326	1.2224	0.3336	0.4453	2.0838	1.1929	0.9188	0.9548	1.2676	1.7884	0.2841
9409	TAG54:7-FA16:1	Triacylglycerol	TAG Ester	54266	GC-FID	100010414		0.5288	0.6994	2.2112	0.9386	1.9581	1.0669	0.7364	1.4216	0.7729	6.1258	1.0311	0.9523	0.7076	2.0214	1.6034	0.9896	0.7905	1.0104	1.0559	0.5644	2.3466	1.2246	1.0924	0.9629	1.1534	1.8456	0.2932
9459	TAG55:1-FA16:0	Triacylglycerol	TAG Ester	54267	GC-FID	100010415		0.3797	0.7601	5.4425	0.7997	2.5082	2.5661	1.1599	1.4343	1.2205	11.1712	0.9568	1.0432	0.4275	3.673	1.1215	1.6793	0.9078	1.2466	0.8519	0.676	5.7814	0.5977	0.8026	0.7604	1.6389	3.6758	0.3123
9477	TAG55:2-FA18:1	Triacylglycerol	TAG Ester	54268	GC-FID	100010416		2.5195	1.5958	1.0019	1.2332	1.878	0.3818	0.7183	0.9868	2.7354	10.8023	1.0687	0.6735	0.566	0.7386	1.7164	0.4643	1.0283	0.94	0.4556	0.6881	1.0051	0.8921	1.2341	1.2762	0.6898	1.1106	0.396
9540	TAG55:6-FA20:4	Triacylglycerol	TAG Ester	54269	GC-FID	100010417		0.6465	0.8706	1.5331	0.8349	1.4515	0.8871	0.8438	1.4079	1.2381	5.8407	0.8391	0.9763	0.9589	2.0827	1.0285	0.7603	1.131	1.3476	1.0824	0.7452	1.7949	1.468	1.0237	1.0838	0.8684	1.6153	0.6446
9545	TAG55:7-FA15:0	Triacylglycerol	TAG Ester	54270	GC-FID	100010418		0.5691	0.7857	3.7903	0.8963	1.1244	1.1429	1.1198	1.3041	2.129	7.0184	0.8756	1.0553	0.5899	2.9424	1.0392	0.8687	0.8594	1.5691	1.0069	0.5115	3.7627	1.1106	0.8802	0.9931	0.9355	2.0691	0.6129
9557	TAG55:7-FA22:6	Triacylglycerol	TAG Ester	54271	GC-FID	100010419		0.5686	0.6368	4.2771	0.674	1.2692	1.3885	1.2124	1.0262	1.5835	7.5178	1.1587	1.0912	0.3888	2.7466	0.9738	0.746	0.9113	1.278	0.5623	0.4778	3.9609	0.6904	0.5705	0.4872	1.2326	2.171	0.3881
9619	TAG56:2-FA18:0	Triacylglycerol	TAG Ester	54272	GC-FID	100010420		1.7524	1.9217	1.3958	2.1797	2.133	0.5854	0.558	1.0443	2.9057	13.8094	1.1491	0.9962	0.625	0.609	1.717	0.3	1.0052	0.9373	0.3608	0.8108	0.9863	0.8538	1.5415	1.434	0.9024	1.0038	0.4599
9622	TAG56:2-FA20:0	Triacylglycerol	TAG Ester	54273	GC-FID	100010421		2.1722	2.9557	0.8102	3.017	2.1861	0.4405	1.0207	1.0085	3.7479	13.1306	1.1505	0.9073	0.716	0.5179	2.3877	0.6216	1.4815	0.9727	0.5498	0.8712	0.8588	0.7162	1.2521	1.4479	0.6423	0.9915	0.7315
9651	TAG56:4-FA20:1	Triacylglycerol	TAG Ester	54274	GC-FID	100010422		1.0507	1.6112	1.2498	1.4076	1.8196	0.7889	0.6203	0.9089	1.9088	9.4515	0.8141	1.0998	0.4448	0.7208	2.1716	0.6241	1.0781	1.0155	1.011	0.8035	0.989	0.6368	1.1907	1.2234	0.5399	1.2876	0.4019
9665	TAG56:5-FA18:2	Triacylglycerol	TAG Ester	54275	GC-FID	100010423		0.4761	0.8247	1.6164	1.0138	1.8718	1.1202	0.483	1.1169	1.4947	7.2278	0.6983	0.8379	0.4729	1.1234	1.263	0.8249	1.0239	0.9862	1.4306	0.8665	1.5295	0.855	1.1093	1.0384	0.7092	1.6527	0.345
9674	TAG56:5-FA22:4	Triacylglycerol	TAG Ester	54276	GC-FID	100010424		0.3772	1.4469	1.5668	0.8876	2.561	1.0316	0.6708	1.2202	1.2924	8.9693	1.4047	0.9543	0.9447	1.4242	0.8102	0.349	1.173	1.3805	0.6424	0.6214	1.7319	1.6709	0.9684	0.9092	1.0807	1.6042	0.5578
9683	TAG56:6-FA18:1	Triacylglycerol	TAG Ester	54277	GC-FID	100010425		0.6704	1.6955	1.5949	1.1193	2.4096	0.91	0.801	1.2341	1.3048	9.0692	0.8031	0.9926	0.7534	1.6199	1.6821	0.6453	1.1612	1.4111	0.9827	0.7263	1.584	1.1946	0.9764	0.8877	1.0074	1.724	0.5631
9691	TAG56:6-FA20:5	Triacylglycerol	TAG Ester	54278	GC-FID	100010426		0.6632	1.5378	2.5967	0.8244	2.2301	0.9758	0.7202	1.1881	1.0411	14.22	0.6914	0.822	0.5139	1.9246	2.9829	1.7901	0.9728	1.5897	0.4023	0.6305	1.8284	0.8713	0.7662	0.662	1.1192	1.8418	0.3836
9710	TAG56:7-FA20:5	Triacylglycerol	TAG Ester	54279	GC-FID	100010427		0.9055	2.2309	2.6838	0.8638	2.0853	0.742	0.9616	1.2566	0.883	16.3595	0.6404	1.0096	0.6835	1.9136	4.2004	2.2849	1.1897	1.5361	0.6227	0.6076	1.7679	0.916	0.8125	0.7875	1.1396	2.1526	0.4621
9721	TAG56:8-FA18:1	Triacylglycerol	TAG Ester	54280	GC-FID	100010428		0.9505	1.2756	2.2265	0.898	1.993	0.8807	0.9647	1.1483	1.1621	11.6602	0.6796	1.0085	0.5955	2.0767	2.5208	1.9796	0.9915	1.2372	0.7869	0.4989	1.9228	0.6955	0.9066	0.87	0.9585	2.0856	0.3383
9880	TAG58:10-FA18:2	Triacylglycerol	TAG Ester	54281	GC-FID	100010429		0.5324	0.615	4.5287	0.7727	1.6723	1.9268	1.2755	1.5386	0.94	13.512	0.7312	1.1724	0.6023	3.3548	1.2363	3.3361	0.8022	1.0088	1.4261	0.5552	4.5963	0.4338	0.7674	0.6565	0.9912	3.4433	0.4263
9930	TAG58:3-FA18:1	Triacylglycerol	TAG Ester	54282	GC-FID	100010430		3.7737	3.3246	1.7468	2.0338	2.5643	0.3822	0.4215	1.8489	3.4978	30.9803	0.9796	0.9044	0.4905	0.7582	3.1811	0.5747	1.2087	0.6775	0.3601	0.6009	1.0204	0.5305	1.9007	1.6061	0.5836	1.1342	0.367
9979	TAG58:6-FA20:4	Triacylglycerol	TAG Ester	54283	GC-FID	100010431		0.8083	1.2073	1.5666	1.0051	2.3038	0.9949	0.7864	1.1566	1.1902	8.139	0.9075	1.141	0.859	1.679	1.2847	0.5959	1.0941	1.4549	0.8106	0.7591	1.6564	1.0254	0.6622	0.6677	0.9457	1.5689	0.6115
9990	TAG58:7-FA18:1	Triacylglycerol	TAG Ester	54284	GC-FID	100010432		0.7402	1.626	1.7655	0.9936	2.3504	1.0814	0.9504	1.0064	1.2387	8.6696	0.9535	1.0318	0.6095	1.9339	1.8374	0.8021	1.0991	1.3258	0.8305	0.7474	1.8319	0.8141	0.7067	0.6452	1.0816	1.8551	0.5554
10159	TAG60:12-FA22:6	Triacylglycerol	TAG Ester	54285	GC-FID	100010433		0.3957	0.7478	9.2969	0.6072	2.4736	2.4589	1.9354	1.5532	0.6398	14.4743	0.8885	1.1115	0.3957	5.7718	1.4433	2.8655	0.6743	1.2375	0.62	0.5177	7.3896	0.2665	0.2908	0.2934	1.9553	4.1969	0.3797
7928	CE(16:0)	Cholesterol Ester	CE Ester	54315	GC-FID	100010463		0.9233	0.9766	0.8706	0.8325	0.7879	0.7942	1.0527	0.7973	1.5501	1.6537	1.0394	0.9375	0.9016	0.756	0.5734	1.1209	1.1385	1.1467	0.7684	0.9144	1.3119	1.3769	1.0627	0.9154	1.2883	1.7246	0.8702
7929	CE(16:1)	Cholesterol Ester	CE Ester	54316	GC-FID	100010464		0.6858	0.7486	0.7009	0.6929	1.0855	0.5848	0.7678	1.2285	1.2598	1.4719	1.7972	0.7603	0.8066	0.6906	0.6103	0.6606	0.8686	1.0693	0.5387	1.2319	1.1986	2.866	1.0744	0.9307	1.6553	1.2236	0.6103
7936	CE(20:0)	Cholesterol Ester	CE Ester	54317	GC-FID	100010465		0.9638	1.085	0.6814	1.0479	0.4738	0.536	0.9968	0.6114	1.4971	1.8515	0.8571	0.6782	0.8455	0.5487	0.5895	1.5778	1.3852	1.2078	0.6755	1.1347	0.9845	1.0038	0.9365	1.1042	1.2456	1.7505	1.0032
7937	CE(20:1)	Cholesterol Ester	CE Ester	54318	GC-FID	100010466		0.8386	1.0031	0.6085	1.5552	0.3946	0.6223	1.267	0.5585	1.3228	1.2596	1.1097	0.7654	0.7229	0.4532	0.5518	1.9771	1.5539	1.0568	0.6406	1.2803	1.0045	0.7682	0.8374	1.4199	1.1296	1.396	0.8972
7939	CE(20:3)	Cholesterol Ester	CE Ester	54319	GC-FID	100010467		0.9925	0.8028	1.0528	0.8058	0.8823	0.8498	1.1384	0.9905	1.1128	1.4347	1.6309	1.2719	0.7933	0.6708	0.4454	0.9304	1.1567	0.9342	0.743	1.0296	1.3477	1.8053	1.1411	1.0115	1.4627	1.848	0.5961
7952	CER(18:0)	Sphingolipids	Ceramide	54320	GC-FID	100010468		0.6294	1.2326	0.7963	0.703	1.3417	1.2181	1.276	0.6518	2.0473	3.8252	1.2891	0.6925	0.774	0.6899	0.908	0.7201	1.0539	1.2273	0.6413	0.8305	1.1905	2.0604	0.9461	1.1919	1.4639	1.544	1.0775
7955	CER(20:0)	Sphingolipids	Ceramide	54321	GC-FID	100010469		0.8586	1.0817	0.7136	0.7846	1.3149	0.9183	1.3006	0.6724	2.3099	2.8017	0.9638	0.8927	0.6453	0.7207	1.0078	1.1116	1.0633	1.2623	0.8387	0.9922	1.0931	1.538	1.1286	1.0718	1.3348	1.737	0.8643
7959	CER(24:0)	Sphingolipids	Ceramide	54322	GC-FID	100010470		1.0962	1.1528	0.7378	0.896	0.9614	0.9407	1.0404	0.7619	1.9433	2.8347	0.6705	0.6045	0.9745	0.7423	0.5931	1.2581	0.9926	1.0074	1.0287	0.9028	1.3698	1.4094	1.197	1.0458	1.3162	1.6938	0.6006
8026	DAG(14:0/16:0)	Diacylglycerol	DAG Ester	54323	GC-FID	100010471		0.6347	0.7221	2.5075	0.3595	1.757	0.7942	0.8471	0.9107	3.5171	10.3956	3.1882	0.5864	0.8609	0.7106	0.7489	0.2829	1.1445	0.752	0.3059	0.6186	1.8727	2.3212	1.8383	1.3668	1.1284	1.0893	0.3956
8032	DAG(14:0/18:3)	Diacylglycerol	DAG Ester	54324	GC-FID	100010472		0.5322	0.6838	1.3476	0.5322	1.2761	0.5322	0.5322	0.8498	1.2046	5.0672	0.9871	0.6981	0.5322	1.0243	0.804	0.5322	1.0157	0.8841	0.6381	0.5322	1.6195	1.2647	1.0129	1.1674	0.7639	1.1416	0.5722
8038	DAG(14:1/18:1)	Diacylglycerol	DAG Ester	54325	GC-FID	100010473		0.9618	1.8139	1.111	1.2529	1.0751	0.7619	0.9258	0.7987	1.2658	2.6181	0.9461	0.9682	1.0474	0.9995	0.9599	0.7932	0.7545	0.9682	0.8761	1.0005	1.3118	1.673	1.1884	1.1442	1.0834	0.6965	0.3252
8062	DAG(16:0/22:5)	Diacylglycerol	DAG Ester	54326	GC-FID	100010474		0.4073	1.0728	2.6412	0.8284	1.5251	1.5303	0.5477	1	1.3795	9.253	1.8596	0.9567	0.844	1.4437	0.7782	0.5823	1.0971	1.409	0.591	0.844	2.2253	1.7574	0.8527	0.6551	1.3588	1.844	0.4073
8086	DAG(18:1/20:2)	Diacylglycerol	DAG Ester	54327	GC-FID	100010475		0.5438	1.8252	1.399	1.0189	1.7546	0.8409	0.6444	1.0918	1.5849	6.8298	1.1836	0.9608	1.1384	0.8206	0.9811	0.4128	1.3441	1.1033	0.7588	0.8962	1.28	1.6983	0.851	0.7768	1.0415	1.5028	0.5733
7977	DCER(24:0)	Sphingolipids	Dihydroceramide	54328	GC-FID	100010476		1.1291	0.9381	0.7387	0.6777	1.0389	1.0692	1.0809	0.7791	1.562	2.8059	0.7712	0.8451	0.928	0.7225	0.6088	1.0283	1.3856	1.0288	0.9616	1.1862	1.2551	1.3974	1.0109	0.9348	1.2719	1.5379	0.7936
7919	FFA(20:5)	Free Fatty Acids	Polyunsaturated FFA (PUFA)	54329	GC-FID	100010477		0.8813	1.0818	0.9964	1.0598	1.1208	1.0312	0.903	1.0911	0.9302	1.0161	0.9712	0.9845	1.0675	0.816	0.9744	1.2654	1.2041	0.8423	0.9434	1.0937	1.113	0.9331	0.9795	0.9787	1.0036	1.0444	0.9813
6970	LPC(18:2)	Lysophosphatidylcholine	LPC Ester	54331	GC-FID	100010479		1.9304	1.1829	0.7486	0.9409	0.9936	0.4712	1.1978	1.6438	0.9264	0.86	0.757	0.4336	1.8621	1.0354	1.9365	1.0064	0.7422	0.8956	0.6905	0.9856	0.7427	0.7366	0.9914	1.0186	1.1115	1.078	1.4016
6983	LPC(22:5)	Lysophosphatidylcholine	LPC Ester	54333	GC-FID	100010481		0.9867	0.7955	0.9364	0.5208	1.0445	0.5104	0.6766	1.1671	0.6837	1.2078	1.0312	0.5927	1.1937	1.4131	2.0769	0.522	0.7406	0.7843	0.5104	0.7415	1.0208	1.3204	0.793	0.7398	1.0723	1.123	1.1712
7233	LPE(20:3)	Lysophosphatidylethanolamine	LPE Ester	54334	GC-FID	100010482		1.0562	0.9858	0.9636	0.6946	1.0736	0.4335	0.9881	1.8758	0.7737	1.0997	1.2991	0.644	1.1812	0.8489	1.3014	0.7698	0.6709	1.3299	0.7722	1.6155	0.7049	2.2919	1.0119	0.8623	1.0973	1.1835	0.629
6742	PC(12:0/18:1)	Phosphatidylcholine	PC Ester	54335	GC-FID	100010483		0.7669	0.7669	0.7669	0.7669	0.7669	0.7669	0.7669	0.7669	0.7669	0.7669	0.7669	0.7669	0.7669	0.7669	1.2331	0.7669	0.7669	0.7669	0.7669	0.7669	0.7669	0.7669	0.7669	0.7669	0.7669	0.7669	0.7669
6765	PC(14:0/20:4)	Phosphatidylcholine	PC Ester	54338	GC-FID	100010486		0.9521	0.8223	1.2207	0.9495	1.1956	0.7235	1.1982	0.7211	0.9221	2.757	0.9978	1.0017	0.8249	0.8432	0.4598	0.9513	1.3331	1.4538	0.9983	0.8366	1.3629	1.1174	1.0126	1.008	1.2479	1.648	0.848
6777	PC(15:0/20:3)	Phosphatidylcholine	PC Ester	54339	GC-FID	100010487		0.7865	0.7865	0.7865	0.7865	0.7865	0.7865	0.7865	0.7865	1.2783	1.3351	1.0413	0.9184	0.7865	0.7865	0.7865	0.7865	0.8849	0.7865	0.7865	0.7865	0.8785	1.4833	0.7865	0.7865	0.7865	0.8397	0.7865
6790	PC(16:0/18:2)	Phosphatidylcholine	PC Ester	54341	GC-FID	100010489		0.9852	1.0408	0.9381	0.8036	0.8565	0.8042	0.8493	0.7344	1.3088	1.8207	1.0399	0.8344	1.0536	0.5968	0.6026	1.197	1.0391	1.1552	0.7305	0.8821	1.0741	0.9513	1.4242	1.3227	1.0148	1.2072	0.8328
6808	PC(17:0/20:3)	Phosphatidylcholine	PC Ester	54343	GC-FID	100010491		0.7038	1.1605	1.2516	0.9009	1.0216	0.8994	0.9871	0.8722	1.3266	1.4165	1.2551	1.1774	0.6488	1.0129	0.6488	0.9729	0.8573	1.4189	0.7739	0.9385	1.2156	1.8067	0.8817	0.8574	0.6488	1.3334	0.6518
6820	PC(18:0/18:2)	Phosphatidylcholine	PC Ester	54345	GC-FID	100010493		1.0278	0.8116	0.8852	0.8561	0.8118	0.6856	0.7297	0.8244	1.2141	1.688	0.8477	0.8439	1.0168	0.6299	0.5834	1.2851	1.2541	1.3555	0.7689	0.9832	1.1577	0.9068	1.6071	1.4965	1.2155	1.3804	0.8855
6835	PC(18:1/16:1)	Phosphatidylcholine	PC Ester	54346	GC-FID	100010494		1.1501	1.2515	0.7866	1.1327	0.9884	0.5567	0.7581	0.8743	1.0328	1.2646	1.1528	1.0494	0.7161	0.8106	1.1226	0.8259	0.8795	0.9802	0.8849	1.2667	0.8223	1.207	1.0607	0.9551	1.0429	1.0116	0.7617
6838	PC(18:1/18:3)	Phosphatidylcholine	PC Ester	54347	GC-FID	100010495		2.6658	2.2403	0.5815	0.7531	0.7203	0.4514	1.1844	1.0503	0.9615	1.2096	0.5449	1.209	0.8966	0.5833	1.1087	0.7272	0.968	1.558	0.5495	1.4577	0.4957	0.7253	3.094	2.5162	1.032	0.9096	0.697
6864	PC(18:2/22:6)	Phosphatidylcholine	PC Ester	54349	GC-FID	100010497		0.6431	0.6431	0.9938	0.6431	0.9672	0.6431	0.6431	0.6431	0.6431	1.0534	1.0088	0.854	0.6431	0.8862	0.6431	1.2788	1.017	0.6431	0.6431	0.6431	1.0062	0.6431	0.6431	0.6431	0.7986	1.4452	0.9129
6865	PC(20:0/14:1)	Phosphatidylcholine	PC Ester	54350	GC-FID	100010498		0.6924	0.6924	0.9876	0.6924	0.6924	0.6924	0.6924	0.6924	0.6924	1.4712	0.6924	0.7534	0.6924	0.7861	0.6924	0.6924	1.0223	1.1436	0.6924	0.6924	0.6924	1.2479	0.6924	0.6924	0.6924	1.0124	0.894
7044	PE(16:0/22:4)	Phosphatidylethanolamine	PE Ester	54358	GC-FID	100010506		0.6095	1.4963	0.6778	0.6095	1.3591	0.6095	0.6095	0.9789	0.6095	1.9232	1.3945	0.9026	1	0.6095	0.6095	0.6095	1.3603	1.0244	0.6095	0.6095	0.9085	2.317	0.9325	0.9706	0.9454	1.2602	0.6095
7045	PE(16:0/22:5)	Phosphatidylethanolamine	PE Ester	54359	GC-FID	100010507		0.2452	1.974	1.2471	0.5545	1.8629	0.556	0.4411	0.9094	1.0594	3.4609	1.1383	1.0192	0.8484	0.7417	1.1846	0.5307	1.1672	1.2279	0.5348	0.7249	1.068	1.5735	0.9758	1.0471	0.7218	1.2377	0.6796
7078	PE(18:0/20:1)	Phosphatidylethanolamine	PE Ester	54363	GC-FID	100010511		0.6396	0.6396	0.6396	0.6396	0.6396	0.6396	0.6396	0.6396	0.6396	1.3604	0.6396	0.6396	0.6396	0.6396	0.6396	0.6396	0.6396	0.6396	0.6396	0.6396	0.6396	0.6396	0.6396	0.6396	0.6396	0.6396	0.6396
7097	PE(18:1/20:4)	Phosphatidylethanolamine	PE Ester	54364	GC-FID	100010512		1.2472	1.8675	0.9007	1.2623	1.4621	0.824	0.8304	0.7905	0.8518	2.5135	1.5508	1.2123	0.8994	0.8424	1.2235	1.0207	1.4236	1.2816	0.6813	0.8048	0.8816	0.7909	0.908	0.9793	0.8801	1.3636	0.9096
7125	PE(O-16:0/18:1)	Phosphatidylethanolamine	PE Ether	54366	GC-FID	100010514		0.6998	0.6998	0.6998	0.6998	0.6998	0.6998	0.6998	0.6998	1.0328	0.6998	0.8991	0.6998	0.6998	0.6998	0.6998	0.9573	1.1247	0.8064	0.6998	1.0139	0.9286	1.2387	0.6998	0.6998	0.991	0.6998	1.1485
7144	PE(O-18:0/18:2)	Phosphatidylethanolamine	PE Ether	54368	GC-FID	100010516		1.303	1.3104	0.6877	0.7728	0.6731	0.6016	0.4417	0.8988	1.6458	1.4163	0.7981	0.5751	0.9169	0.5156	0.6098	1.1067	1.2169	1.0802	0.7147	1.0718	0.6671	1.4306	1.2554	1.1368	1.2829	0.9576	1.0054
7155	PE(O-18:0/22:5)	Phosphatidylethanolamine	PE Ether	54370	GC-FID	100010518		1.043	0.9749	0.9855	1.1501	0.9063	0.8721	0.9442	0.841	1.1308	2.0342	0.7573	0.8749	1	0.7197	0.7419	0.7419	0.9239	1.3214	0.7197	1.3792	0.7561	1.3365	1.0587	1.1359	1.7966	1.1932	1.3011
7156	PE(O-18:0/22:6)	Phosphatidylethanolamine	PE Ether	54371	GC-FID	100010519		1.0165	1.0275	1.0703	0.9555	1.5292	1.0876	0.8761	1.1641	0.5731	1.5761	0.9697	0.8271	0.698	1	0.9487	1.0856	0.9073	1.5089	0.7377	0.9332	1.0504	0.6632	0.8047	0.5731	1.3715	1.7968	0.9368
7161	PE(P-16:0/16:0)	Phosphatidylethanolamine	PE Plasmalogen	54373	GC-FID	100010521		0.9196	0.9196	0.9196	0.9196	0.9196	0.9196	0.9196	1	0.9196	0.9196	0.9196	0.9196	0.9196	0.9196	0.9196	0.9196	0.9196	0.9196	0.9196	0.9196	0.9196	1.4858	0.9196	0.9196	1.188	0.9196	0.9354
7184	PE(P-18:0/18:2)	Phosphatidylethanolamine	PE Plasmalogen	54377	GC-FID	100010525		1.7038	0.8921	0.6361	0.8554	0.5966	0.6211	0.5894	1.0072	1.5483	1.4367	0.492	0.5272	0.933	0.4135	0.6277	1.9627	1.5685	1.579	0.7719	1.1121	0.7955	1.3423	0.9928	0.9268	1.9622	1.2482	1.5246
7209	PE(P-18:1/20:5)	Phosphatidylethanolamine	PE Plasmalogen	54380	GC-FID	100010528		1.1307	0.4661	0.9573	0.4661	0.6169	0.7809	0.7413	0.7726	0.4661	1.3785	0.4661	0.8509	0.4661	0.5115	1.4814	1.0243	1.0443	1.9521	0.4661	0.8862	1.5115	0.4661	0.4661	0.4661	1.4836	1.0457	1.4055
7496	PI(16:0/16:1)	Phosphatidylinositol	PI Ester	54381	GC-FID	100010529		0.6685	0.7686	1.1351	0.6685	0.935	0.6685	0.6685	0.8049	0.6685	0.8837	3.5466	1.1695	0.9543	0.6685	0.6685	0.6685	1	0.873	0.6685	1.3846	0.9856	4.4628	1.7073	1.4209	1.5116	0.6685	0.6685
7499	PI(16:0/18:2)	Phosphatidylinositol	PI Ester	54382	GC-FID	100010530		0.6275	0.7275	1.5428	0.7468	0.6927	0.6193	0.8294	0.8539	1.0248	1.3498	0.9508	1.2277	1.3158	0.3517	0.417	1.1525	1.5804	0.7248	1.0596	1.5246	0.9387	2.5242	2.3605	1.8835	0.9752	1.4841	0.5563
7509	PI(16:0/22:4)	Phosphatidylinositol	PI Ester	54383	GC-FID	100010531		0.9721	0.9721	0.9721	0.9721	0.9721	0.9721	0.9721	0.9721	0.9721	0.9721	0.9721	0.9721	0.9721	0.9721	0.9721	0.9721	0.9721	0.9721	0.9721	0.9721	0.9721	1.0279	0.9721	0.9721	0.9721	0.9721	0.9721
7545	PI(18:0/22:5)	Phosphatidylinositol	PI Ester	54384	GC-FID	100010532		1.0219	1.3042	1.3565	0.6797	1.2317	0.8354	0.9785	0.6797	1.2425	2.6707	1.302	0.7891	0.9423	0.9182	0.892	0.7611	0.9552	0.7116	0.6797	0.8806	0.7841	1.3996	0.9354	1.1578	1.4207	1	1.1438
8006	SM(16:0)	Sphingolipids	Sphingomyelin	54385	GC-FID	100010533		1.0055	0.9517	0.8056	0.8319	0.7324	0.7827	1.0398	0.794	1.4478	1.3112	0.7774	0.9243	0.9945	0.6893	0.6194	1.2865	1.143	1.0689	0.8372	0.9274	1.0993	1.3793	1.0801	1.0782	1.1497	1.3465	0.9378
8007	SM(18:0)	Sphingolipids	Sphingomyelin	54386	GC-FID	100010534		1.0263	0.9627	0.7448	0.8073	0.9903	1.0386	1.0977	0.7182	1.6624	1.8746	1.0547	0.9165	0.8273	0.7888	0.7994	1.0781	0.9356	1.2163	0.7326	0.783	1.0097	1.1729	1.0291	0.9676	1.1658	1.1904	1.1015
8015	SM(26:0)	Sphingolipids	Sphingomyelin	54387	GC-FID	100010535		0.8093	1.0634	0.7843	0.7032	0.9245	0.571	1.0604	0.8301	1.602	1.4785	0.9255	1.0207	1.0087	0.8581	0.6578	1.0464	1.3706	1.1629	0.7669	0.8214	0.8935	1.1853	0.9626	0.9215	1.0351	1.2838	1.17
8398	TAG36:0-FA12:0	Triacylglycerol	TAG Ester	54388	GC-FID	100010536		0.6789	0.3238	2.0026	2.094	0.389	0.3238	0.4883	0.5457	9.0731	2.047	36.4987	0.3238	1.8564	0.3708	3.5561	0.3238	0.3238	0.3238	0.3238	0.3238	0.7702	0.6632	1.9687	2.1567	0.3238	0.3238	0.5091
8470	TAG44:0-FA14:0	Triacylglycerol	TAG Ester	54389	GC-FID	100010537		0.73	0.2288	5.3147	0.3481	1.6655	0.2971	1.1058	1.0306	20.3752	17.5088	6.6234	0.3758	0.8842	0.4743	0.9694	0.1682	0.8555	0.5377	0.1319	0.4118	2.9425	3.1922	4.0658	3.4811	1.7008	0.5564	0.3188
8476	TAG44:1-FA12:0	Triacylglycerol	TAG Ester	54390	GC-FID	100010538		0.9849	0.3084	4.4222	0.6244	1.3778	0.2636	0.708	1.3529	10.0907	9.0249	12.2751	0.2427	1.0151	0.4267	2.6831	0.1516	0.8258	0.624	0.2564	0.3871	3.124	3.3787	3.6062	3.2987	0.9742	0.5804	0.5244
8499	TAG44:3-FA18:2	Triacylglycerol	TAG Ester	54391	GC-FID	100010539		1.1903	0.31	3.4772	0.6709	2.5714	0.3054	0.8606	1.5813	6.996	14.9485	1.675	0.3216	0.4384	0.664	1.0145	0.2348	0.9855	0.7218	0.4199	0.3031	1.2551	1.7039	4.4881	3.7814	0.5656	0.627	0.1874
8510	TAG45:0-FA14:0	Triacylglycerol	TAG Ester	54392	GC-FID	100010540		1.1042	0.3714	4.6269	0.4185	1.005	0.479	1.3597	0.9882	22.0605	12.5697	3.484	0.363	0.7765	0.4034	0.6571	0.2924	1	0.7513	0.2924	0.4672	2.2185	3.8723	3.3748	3.4252	0.9546	0.4908	0.4555
8539	TAG46:0-FA14:0	Triacylglycerol	TAG Ester	54393	GC-FID	100010541		0.5371	0.4379	3.8638	0.4572	2.4277	0.4035	0.9802	1.2356	10.2639	21.8988	6.7034	0.4869	0.9179	0.6322	0.831	0.2006	1.0198	0.6302	0.1616	0.5029	2.5579	3.5288	3.2707	3.1007	2.0683	0.7522	0.278
8554	TAG46:1-FA18:1	Triacylglycerol	TAG Ester	54394	GC-FID	100010542		1.0153	0.5415	2.7408	0.758	1.397	0.4202	0.7109	1.0827	5.5664	8.3736	5.1341	0.5273	0.9847	0.6619	1.8732	0.2687	0.8452	0.6432	0.4138	0.4728	2.0606	1.8656	2.1409	1.9843	0.8533	0.8098	0.4213
8572	TAG46:3-FA14:0	Triacylglycerol	TAG Ester	54395	GC-FID	100010543		0.7263	0.2455	3.0144	0.4636	1.0542	0.4342	0.7167	1.0329	5.1056	8.4739	2.0898	0.4643	0.6248	0.7675	1.085	0.2202	1.1036	0.9671	0.716	0.4815	2.0974	1.3944	3.5123	2.8615	0.8608	0.9616	0.1728
8575	TAG46:3-FA16:0	Triacylglycerol	TAG Ester	54396	GC-FID	100010544		0.6736	0.4571	2.5736	0.5279	1.8257	0.4886	0.5621	1.6121	3.5893	10.49	3.99	0.4229	0.6493	0.775	2.0329	0.295	1.035	0.8693	0.3829	0.5407	1.825	1.9793	5.9964	4.9143	0.965	0.8329	0.2543
8576	TAG46:3-FA16:1	Triacylglycerol	TAG Ester	54397	GC-FID	100010545		0.8094	0.3587	3.2795	0.787	1.472	0.62	0.5852	1.9204	3.2145	5.731	5.5848	0.5133	0.9695	0.8257	2.3935	0.3502	1.012	0.6687	0.9424	0.5814	2.9842	2.6223	3.6823	3.2455	0.988	1.0298	0.3177
8615	TAG47:1-FA16:0	Triacylglycerol	TAG Ester	54398	GC-FID	100010546		0.6607	0.4833	2.4254	0.6233	1.1872	0.4159	0.676	1.3093	5.5778	10.597	3.6957	0.7023	0.8934	0.7681	0.9013	0.2443	1.0661	0.9339	0.2459	0.5886	1.9352	4.5096	2.4907	2.2838	1.2335	0.7339	0.3601
8654	TAG48:0-FA14:0	Triacylglycerol	TAG Ester	54399	GC-FID	100010547		0.6165	0.7538	2.7256	0.5561	1.8687	0.5405	0.6834	1.0253	6.5453	14.7946	3.9431	0.6981	0.7412	0.6404	0.9747	0.1568	1.0394	0.7995	0.2201	0.5455	2.1231	2.3485	2.5336	2.5332	1.4976	0.893	0.3026
8658	TAG48:0-FA18:0	Triacylglycerol	TAG Ester	54400	GC-FID	100010548		0.7642	0.6423	3.0585	0.562	1.8915	0.4968	0.8438	1.0407	7.6814	15.6984	4.5007	0.5378	0.7675	0.6359	1.0048	0.189	0.9952	0.8396	0.213	0.5419	2.1923	2.6065	2.6105	2.5012	1.4349	0.8515	0.3931
8670	TAG48:1-FA18:1	Triacylglycerol	TAG Ester	54401	GC-FID	100010549		0.566	0.7688	2.1303	0.5936	1.5464	0.5858	0.5115	0.8675	3.7222	10.3735	2.9075	0.7792	0.7895	0.6972	1.1254	0.2133	1.0053	0.8333	0.3287	0.6009	1.8866	1.8853	1.8188	1.7104	1.2217	1.0101	0.3025
8681	TAG48:2-FA16:1	Triacylglycerol	TAG Ester	54402	GC-FID	100010550		0.4846	0.6636	1.6074	0.86	2.1516	0.7812	0.4818	1.4119	2.1993	8.6694	3.6898	1.0315	0.9035	0.802	1.4206	0.2772	1.0163	0.9837	0.5686	0.7549	1.9957	3.8097	2.5692	2.2616	1.5445	1.1267	0.2899
8706	TAG48:4-FA14:1	Triacylglycerol	TAG Ester	54403	GC-FID	100010551		0.6216	0.4428	1.5745	0.7248	1.397	0.6536	0.6101	1.379	2.4326	6.0551	1.2227	0.8818	0.5594	0.8786	1.0157	0.4582	0.9529	1.0984	1.0298	0.6838	1.5194	1.7738	3.1381	2.9414	0.826	1.0388	0.2134
8709	TAG48:4-FA18:1	Triacylglycerol	TAG Ester	54404	GC-FID	100010552		1.4432	0.5797	1.6551	0.6026	1.5744	0.4371	0.6109	1.285	2.9782	9.2924	3.3433	0.5623	0.5389	0.8406	3.2451	0.3729	1.0493	0.9548	0.7017	0.5563	1.4469	0.9677	5.308	4.7994	0.5934	1.0323	0.2811
8746	TAG49:0-FA17:0	Triacylglycerol	TAG Ester	54405	GC-FID	100010553		0.519	0.5869	2.2172	0.4816	1.5314	0.4393	0.7651	1.2996	5.9174	17.2516	3.4936	0.5585	1.0144	0.7354	0.7391	0.2518	0.9856	0.8054	0.2412	0.6711	2.179	3.4379	2.48	2.1135	1.4338	0.8481	0.4641
8773	TAG49:2-FA18:1	Triacylglycerol	TAG Ester	54406	GC-FID	100010554		0.7866	0.7073	1.5095	0.8324	1.0448	0.6132	0.6063	1.005	3.8178	6.1903	1.4882	0.995	0.6749	0.8426	1.2325	0.2404	1.0067	1.1115	0.573	0.6523	1.7191	2.3092	1.6003	1.4061	0.7176	1.0144	0.4173
8787	TAG49:3-FA18:3	Triacylglycerol	TAG Ester	54407	GC-FID	100010555		0.6517	0.5656	1.4922	0.5179	1.2608	0.4817	0.6438	0.923	3.14	10.1584	1.077	0.7993	0.7241	1.2268	0.7233	0.1794	1.3772	1.2882	0.4723	0.5078	1.5689	1.7519	2.7118	2.2307	0.7479	1.4807	0.4065
8696	TAG48:3-FA16:1	Triacylglycerol	TAG Ester	54408	GC-FID	100010556		0.5019	0.4187	2.2969	0.9155	1.4988	0.948	0.5124	1.3016	2.0865	6.0776	1.9377	0.9792	0.6974	1.018	1.227	0.4962	0.8961	0.982	1.1003	0.7417	2.7757	2.5269	2.2156	2.079	1.1149	1.3947	0.2268
8864	TAG50:3-FA18:1	Triacylglycerol	TAG Ester	54409	GC-FID	100010557		0.5679	0.7369	2.0727	0.8727	1.4376	0.9213	0.5479	1.0734	2.2409	6.6008	1.1444	1.0344	0.6071	1.0027	1.3671	0.6306	0.9678	0.9973	1.175	0.6649	2.2949	1.2518	1.6526	1.4819	0.8289	1.5209	0.2934
8891	TAG50:5-FA16:0	Triacylglycerol	TAG Ester	54410	GC-FID	100010558		0.5712	0.9249	2.089	0.8778	1.8624	0.7918	0.6976	1.2837	0.969	8.4987	1.194	1.0849	0.8112	1.766	1.4961	0.6961	1.031	1.1372	0.6886	0.6221	1.8086	1.6284	2.7671	2.8	0.9458	1.6239	0.4067
8896	TAG50:5-FA18:3	Triacylglycerol	TAG Ester	54411	GC-FID	100010559		0.5529	0.4614	1.8457	0.7765	1.4967	0.7727	0.6238	1.0206	1.4856	6.6466	0.8211	1.0112	0.451	1.4426	1.5943	0.5724	0.9888	1.0974	1.4038	0.541	2.0559	1.0991	2.287	2.171	0.7709	1.9405	0.1681
8950	TAG51:1-FA17:0	Triacylglycerol	TAG Ester	54412	GC-FID	100010560		0.6245	0.9735	1.3162	0.7357	1.3022	0.5673	0.5453	1.0832	2.9808	12.2753	1.7443	0.7925	0.776	0.7603	0.9398	0.211	0.9808	1.0831	0.3028	0.6213	1.7103	2.3309	1.8026	1.5875	1.0728	1.0259	0.4858
8967	TAG51:2-FA18:2	Triacylglycerol	TAG Ester	54413	GC-FID	100010561		0.4466	0.6662	2.0355	0.8693	1.3404	0.9213	0.6388	1.3421	3.255	10.9141	1.286	0.9016	0.8962	1.2603	0.8241	0.5024	1.1778	1.3569	0.6996	0.63	2.8086	2.29	2.3979	2.2257	0.9759	1.7126	0.483
8989	TAG51:4-FA16:0	Triacylglycerol	TAG Ester	54414	GC-FID	100010562		0.9134	0.9891	1.1902	0.8846	1.0986	0.9758	0.9922	1.0492	1.1702	2.3454	1.0078	0.9869	0.9739	1.0929	1.0324	0.9242	0.9869	1.0987	0.9618	0.9696	1.175	1.0153	1.1613	1.1263	1.0263	1.0676	0.9491
8992	TAG51:4-FA18:1	Triacylglycerol	TAG Ester	54415	GC-FID	100010563		1.0049	0.9951	1.2022	0.9209	1.05	0.9614	0.8876	1.0888	1.5484	3.182	0.9234	1.1015	0.827	1.0847	1.1076	0.8607	1.1077	1.1076	0.9372	0.9003	1.2381	0.9014	1.3066	1.2507	0.9832	1.1389	0.8318
9006	TAG51:5-FA18:3	Triacylglycerol	TAG Ester	54416	GC-FID	100010564		0.5381	0.5048	1.4661	0.713	1.1015	0.6341	0.6548	1.0217	1.9991	5.9806	0.4979	1.0997	0.5053	1.3862	1.0406	0.4453	1.1666	1.1361	0.9783	0.5108	1.5501	1.1274	2.1066	1.8519	0.5814	1.8634	0.2838
9040	TAG52:1-FA16:0	Triacylglycerol	TAG Ester	54417	GC-FID	100010565		0.604	1.7877	1.1364	0.8942	1.8604	0.7736	0.5	1.0485	2.0481	11.2315	1.6972	0.877	0.6576	0.6425	1.1752	0.2421	0.9515	0.8932	0.3586	0.6776	1.3252	1.4399	1.4875	1.4485	1.083	1.2164	0.4739
9066	TAG52:2-FA20:2	Triacylglycerol	TAG Ester	54418	GC-FID	100010566		0.2401	0.8565	1.871	0.6647	1.9033	0.8373	0.3742	1.0188	2.0431	9.2459	2.9725	0.7246	1.0812	1.0324	0.6815	0.2691	1.0229	0.8164	0.3168	0.7636	1.9789	2.2851	1.7261	1.3898	1.4497	1.1557	0.3812
9094	TAG52:4-FA18:3	Triacylglycerol	TAG Ester	54419	GC-FID	100010567		0.4622	1.2816	1.0959	0.7203	2.0428	0.7953	0.546	0.9802	1.4083	8.6769	0.7728	1.0198	0.5099	1.0845	1.4443	0.3645	1.1887	1.1366	0.7223	0.5377	1.3797	1.0273	1.7428	1.5538	0.9135	1.7837	0.3338
9110	TAG52:5-FA18:1	Triacylglycerol	TAG Ester	54420	GC-FID	100010568		0.6598	1.0174	1.1685	1.0126	1.8276	0.8472	0.5894	0.967	1.4101	6.7891	0.6935	1.3087	0.4026	1.4063	2.1026	0.7117	0.9874	1.033	1.1187	0.7267	1.4652	0.805	1.9791	1.7181	0.8358	1.8042	0.2893
9122	TAG52:6-FA14:0	Triacylglycerol	TAG Ester	54421	GC-FID	100010569		0.3683	0.5178	4.4328	0.5936	1.586	0.7675	0.6302	1.0577	1.2683	9.3389	1.1985	0.6681	0.6132	2.1905	1.0992	0.7444	0.9662	0.9074	1.0159	0.4894	3.1937	0.9841	1.2935	1.1859	1.0425	1.7102	0.2462
9128	TAG52:6-FA18:1	Triacylglycerol	TAG Ester	54422	GC-FID	100010570		0.6537	0.9141	1.6415	0.8705	1.7028	0.7767	0.6802	1.1342	1.3396	8.2178	0.6477	1.103	0.4577	1.7021	2.3284	1.0213	1.1406	0.9787	1.0447	0.5911	1.7474	0.7844	3.292	2.8075	0.8226	1.9119	0.3029
9144	TAG52:7-FA18:1	Triacylglycerol	TAG Ester	54423	GC-FID	100010571		0.6809	1.1232	1.8105	0.7406	1.1618	0.5756	0.5813	0.9617	2.8515	9.9523	1.5865	0.7666	0.5581	1.1085	1.4159	0.6536	0.9358	1.1836	0.497	0.6416	1.5507	1.774	2.4275	2.2885	0.947	0.9863	0.4689
9186	TAG53:1-FA18:0	Triacylglycerol	TAG Ester	54424	GC-FID	100010572		0.9031	1.1903	1.2123	0.8916	1.452	0.5437	0.6177	0.9838	3.4627	12.216	1.4083	0.5946	0.5283	0.7877	1.1857	0.2157	0.9899	1.0344	0.3239	0.7253	1.4691	1.8143	1.8699	1.7794	0.7001	0.9798	0.6145
9201	TAG53:2-FA18:1	Triacylglycerol	TAG Ester	54425	GC-FID	100010573		0.8218	1.5308	1.0476	0.9999	1.4688	0.7173	0.6369	1.0053	2.5134	8.4129	0.9997	1.0177	0.6055	0.9344	1.4877	0.3031	1.0001	1.2798	0.5551	0.7567	1.4435	1.3908	1.2932	1.0887	0.6884	1.2633	0.5899
9226	TAG53:4-FA17:0	Triacylglycerol	TAG Ester	54426	GC-FID	100010574		0.5512	0.6009	1.8841	0.9981	1.2213	1.1179	0.5905	1.2147	2.0399	6.9833	0.5627	0.8961	0.549	1.8194	0.9029	1.0019	0.9908	1.2909	1.4413	0.6711	2.8478	1.1047	1.8523	1.7023	0.6509	2.2377	0.3768
9243	TAG53:5-FA18:1	Triacylglycerol	TAG Ester	54427	GC-FID	100010575		0.9922	1.0058	1.0087	0.9942	1.015	1.0143	0.927	1.0525	1.0569	1.1554	0.9744	0.9745	0.9216	0.9922	1.033	1.0175	0.9427	1.0539	1.013	1.0435	1.029	1.0064	0.9444	0.9823	1.0163	0.993	0.9739
9259	TAG53:6-FA18:2	Triacylglycerol	TAG Ester	54428	GC-FID	100010576		0.8787	0.9269	1.0522	1.0796	0.9912	1.0016	0.9626	1.0846	1.075	1.7875	0.9159	0.9533	0.9541	1.0771	1.0186	1.0001	0.9319	1.0301	1.0927	0.9993	1.1609	0.8849	0.9999	1.0471	1.009	1.1627	0.9326
9292	TAG54:1-FA16:0	Triacylglycerol	TAG Ester	54429	GC-FID	100010577		1.1893	1.0958	1.3774	1.0875	1.6326	0.4418	0.6681	0.963	3.5771	11.8466	1.4954	0.7747	0.8206	0.413	1.0049	0.2733	0.9193	0.8626	0.271	0.5616	1.0238	0.9951	1.2784	1.2581	0.8964	0.8316	0.495
9297	TAG54:1-FA20:0	Triacylglycerol	TAG Ester	54430	GC-FID	100010578		0.9389	1.8558	0.8909	1.6459	1.6692	0.5575	0.9136	1.0599	2.8684	9.5396	1.7368	0.8262	0.7702	0.4749	1.5604	0.4711	1.1258	1.0266	0.3696	0.8263	0.9734	0.9181	1.1422	1.4579	0.8929	0.8299	0.6308
9298	TAG54:1-FA20:1	Triacylglycerol	TAG Ester	54431	GC-FID	100010579		0.8198	1.4172	1.4635	1.2651	1.7249	0.7172	0.5679	1.1521	2.3377	9.2678	1.7871	0.9124	0.6736	0.5561	1.2283	0.3246	1.1512	0.9664	0.3881	0.9233	1.0967	0.9732	1.3014	1.5334	1.0858	1.0268	0.4321
9323	TAG54:2-FA18:2	Triacylglycerol	TAG Ester	54432	GC-FID	100010580		0.791	1.1834	1.3812	1.0783	1.9231	0.8135	0.5851	1.134	2.3617	11.1527	0.9131	0.7394	0.5795	0.832	1.0364	0.6896	0.9981	1.0019	0.6395	0.688	1.5846	1.0786	1.9103	1.7663	0.8706	1.5144	0.4498
9339	TAG54:3-FA18:2	Triacylglycerol	TAG Ester	54433	GC-FID	100010581		0.7533	1.3197	1.3164	1.1928	2.1387	0.9936	0.6149	1.0711	2.1987	9.3324	0.866	0.979	0.5071	1.0064	1.4105	0.7032	0.9896	1.1049	0.9505	0.7343	1.6006	0.9232	1.6445	1.5229	0.8479	1.6733	0.4292
9342	TAG54:3-FA20:1	Triacylglycerol	TAG Ester	54434	GC-FID	100010582		0.5761	0.9889	1.7585	1.0987	1.5718	1.1168	0.5068	1.1286	1.9074	6.0872	1.3161	1.0824	0.664	0.796	1.165	0.5803	0.9417	1.0111	0.6576	0.8196	1.5082	0.9768	1.2812	1.3265	0.9495	1.2932	0.3938
9354	TAG54:4-FA18:1	Triacylglycerol	TAG Ester	54435	GC-FID	100010583		0.8681	1.6121	1.1501	1.2548	2.1336	0.9467	0.5905	0.9836	1.9515	7.8155	0.6876	1.1545	0.4981	1.0164	1.8192	0.7044	1.0742	0.9446	1.2945	0.7732	1.2936	0.8105	1.4559	1.3356	0.6315	1.6013	0.3881
9356	TAG54:4-FA18:3	Triacylglycerol	TAG Ester	54436	GC-FID	100010584		0.9983	1.7106	1.0354	0.8696	2.4659	0.7541	0.6437	0.9543	1.9383	11.2703	0.7031	1.152	0.3884	1.194	2.2612	0.4873	1.215	1.2655	0.8285	0.7125	1.3057	0.85	2.2078	1.8577	0.9053	1.8998	0.3679
9361	TAG54:4-FA20:4	Triacylglycerol	TAG Ester	54437	GC-FID	100010585		0.369	1.1814	1.5505	0.6328	2.2246	0.8353	0.5765	1.2589	1.1222	12.037	1.3237	0.7261	0.8408	1.5594	0.8627	0.356	1.024	1.1462	0.4886	0.4682	1.5822	1.4647	1.125	1.0475	0.976	1.5921	0.4396
9362	TAG54:4-FA22:1	Triacylglycerol	TAG Ester	54438	GC-FID	100010586		0.7371	1.4786	1.2264	1.2022	2.2074	0.9188	0.6003	0.9864	2.0084	8.6236	0.7776	1.173	0.431	0.9603	1.7309	0.6986	1.1252	1.0136	1.337	0.7035	1.4461	0.9593	1.4209	1.4772	0.6324	1.5404	0.3594
9368	TAG54:5-FA16:0	Triacylglycerol	TAG Ester	54439	GC-FID	100010587		0.3337	0.9685	1.8362	0.6937	2.1277	0.8771	0.5594	1.3944	1.1195	8.3811	1.2997	0.8941	0.6891	1.5741	0.8692	0.5505	1.0427	1.1486	0.824	0.6972	1.9121	1.4403	1.3488	1.211	1.0315	1.7538	0.3723
9371	TAG54:5-FA18:0	Triacylglycerol	TAG Ester	54440	GC-FID	100010588		0.6802	1.0982	1.241	0.7753	2.1455	0.8629	0.5776	0.9674	1.5913	10.7776	0.7068	1.0391	0.3828	1.2783	1.7594	0.6413	1.0025	1.183	0.8741	0.645	1.5826	0.8396	2.3597	2.1811	0.9975	1.9449	0.3327
9374	TAG54:5-FA18:3	Triacylglycerol	TAG Ester	54441	GC-FID	100010589		0.943	1.9306	0.9385	1.0649	2.2057	0.8554	0.7105	0.9429	1.8711	8.8866	0.5822	1.4339	0.4103	1.2279	2.7137	0.5447	1.2445	1.1695	1.057	0.7517	1.1986	0.7491	1.8467	1.5673	0.8085	1.9635	0.365
9381	TAG54:5-FA22:1	Triacylglycerol	TAG Ester	54442	GC-FID	100010590		0.5104	1.027	1.3966	1.0972	1.7906	0.973	0.5277	0.9371	1.4542	7.9507	0.5679	0.9694	0.3802	1.1477	1.4092	1.1177	1.0716	0.8148	1.6218	0.5869	1.5236	0.6993	1.4534	1.4632	0.5873	1.7732	0.2859
9420	TAG54:7-FA22:5	Triacylglycerol	TAG Ester	54443	GC-FID	100010591		0.4245	0.4987	3.9192	0.8386	1.6757	1.1647	0.7681	1.169	1.4408	7.1231	1.2777	0.9411	0.4902	2.5635	1.1364	1.1718	0.9497	1.0801	1.16	0.7398	4.2883	1.0121	0.9861	0.8353	0.9879	2.4037	0.2562
9433	TAG54:8-FA20:5	Triacylglycerol	TAG Ester	54444	GC-FID	100010592		0.5146	0.8443	2.8615	0.9588	1.8214	0.8611	0.7824	1.4936	0.6724	11.9769	0.5698	0.958	0.675	2.9308	3.4253	2.9804	0.9043	1.3235	0.807	0.4613	2.5225	1.0412	1.2896	1.13	1.231	2.5452	0.2782
9539	TAG55:6-FA20:3	Triacylglycerol	TAG Ester	54445	GC-FID	100010593		0.9197	1.0945	1.0289	1.0988	1.0522	0.9779	0.9714	0.9852	1.0938	1.112	0.9776	1.0518	0.998	0.9651	0.9398	1.0918	0.9689	1.0324	1.0324	1.0495	1.0207	0.9727	0.9861	1.0408	1.0437	0.9514	0.9578
9632	TAG56:3-FA18:1	Triacylglycerol	TAG Ester	54446	GC-FID	100010594		1.8533	2.7148	1.1044	1.8352	2.1522	0.6417	0.6849	0.9162	2.5777	10.7922	1.2469	1.2953	0.6133	0.6878	2.7048	0.4481	1.3633	1.0416	0.5945	0.894	0.8931	0.83	1.3139	1.2078	0.7315	1.056	0.5481
9668	TAG56:5-FA20:1	Triacylglycerol	TAG Ester	54447	GC-FID	100010595		0.8253	1.1683	1.6132	1.2429	1.7669	0.9424	0.551	1.054	1.5705	9.9992	0.6943	1.0582	0.4068	0.9701	2.0422	0.9557	0.9658	1.0299	1.3147	0.6822	1.2514	0.5962	1.3062	1.2854	0.6155	1.4959	0.3515
9670	TAG56:5-FA20:3	Triacylglycerol	TAG Ester	54448	GC-FID	100010596		0.6614	1.9889	1.2863	0.9433	2.6323	0.7927	0.7469	1.1136	1.2079	7.1592	0.9391	1.0253	0.6778	1.1246	1.5043	0.5698	1.1264	1.1609	1.1256	0.9747	1.0424	1.2384	0.9341	0.8308	0.8884	1.3442	0.5508
9671	TAG56:5-FA20:4	Triacylglycerol	TAG Ester	54449	GC-FID	100010597		0.5856	1.5057	1.4931	1.0871	2.6143	1.5504	0.9567	1.0675	1.3996	8.9323	0.8736	1.063	0.5959	1.84	1.3889	0.6358	0.9688	1.6986	0.713	0.6474	1.5708	1.0312	0.6923	0.6037	0.9265	1.6458	0.592
9713	TAG56:7-FA22:5	Triacylglycerol	TAG Ester	54450	GC-FID	100010598		0.3466	0.8766	2.8805	0.9721	2.1848	1.5219	0.7286	1.2836	1.3331	7.9635	1.0279	0.9273	0.5627	2.5372	1.0906	1.1883	0.9603	1.4628	0.9364	0.803	3.4213	1.0611	0.9714	0.8789	1.2008	2.7215	0.4282
9727	TAG56:8-FA20:4	Triacylglycerol	TAG Ester	54451	GC-FID	100010599		0.5154	0.8484	1.5317	0.8629	2.0814	0.9575	0.8772	1.6536	0.648	13.568	0.6019	0.9218	1.0115	1.7877	0.9885	1.3233	1.19	1.3312	1.7725	0.4343	1.6313	1.1097	1.1903	1.0956	0.6805	2.3119	0.4243
9746	TAG56:9-FA22:6	Triacylglycerol	TAG Ester	54452	GC-FID	100010600		0.4784	0.6261	4.5957	0.8575	2.4274	2.3451	1.284	1.3048	0.9458	8.4893	1.0151	1.4173	0.3011	4.2971	1.8499	1.9396	0.8129	1.1194	0.9849	0.6613	5.6122	0.417	0.7017	0.6482	1.7626	3.3333	0.2374
9853	TAG57:8-FA22:6	Triacylglycerol	TAG Ester	54454	GC-FID	100010602		0.7943	0.9045	2.8394	0.9893	1.2149	1.2814	1.1625	1.0554	1.1902	4.2857	1.0435	0.9278	0.653	2.4334	1.2199	1.2787	0.7847	1.0107	0.869	0.7988	2.9342	0.6685	0.7687	0.7528	0.987	1.7033	0.6202
9971	TAG58:6-FA18:0	Triacylglycerol	TAG Ester	54455	GC-FID	100010603		0.5699	1.3817	2.0331	0.8884	2.8316	1.2795	0.7733	1.0864	1.48	9.2158	0.9857	0.7763	0.6385	2.3383	1.3235	0.7284	0.9975	1.7022	0.6528	0.7388	2.3017	1.2296	1.0025	0.8489	1.3565	2.0069	0.5462
9997	TAG58:7-FA20:4	Triacylglycerol	TAG Ester	54456	GC-FID	100010604		0.5791	0.9674	2.1388	0.9375	2.7154	1.1812	0.8889	1.466	1.0007	7.9274	0.9625	1.1939	0.8733	2.3118	1.2101	0.8046	1.2807	1.5739	0.9993	0.7105	1.7622	1.3543	0.6869	0.7649	1.1106	2.0098	0.5516
10008	TAG58:8-FA18:1	Triacylglycerol	TAG Ester	54457	GC-FID	100010605		0.7836	1.279	2.5559	0.8561	1.8826	1.2578	1.2695	0.9341	1.009	9.0047	0.9249	1.109	0.3877	2.3963	1.9231	1.2656	0.8369	1.1211	0.7831	0.606	2.3125	0.4963	0.5415	0.468	1.0567	1.9752	0.4514
10015	TAG58:8-FA20:4	Triacylglycerol	TAG Ester	54458	GC-FID	100010606		0.5167	1.0878	1.7721	0.9653	3.0149	0.9987	0.9422	1.8305	0.7387	9.5987	0.9048	1.0915	1.0828	2.7597	1.0817	0.8599	1.3141	1.7491	0.9531	0.5915	1.9387	1.4191	0.7592	0.6769	1.0013	2.0393	0.5942
10036	TAG58:9-FA22:6	Triacylglycerol	TAG Ester	54459	GC-FID	100010607		0.6252	0.9596	4.462	0.8015	2.0666	2.1479	1.5687	1.3298	0.9448	10.9958	0.9628	1.2306	0.2815	3.5956	1.819	2.2949	0.7525	0.9419	1.0372	0.5899	4.1911	0.3451	0.4684	0.3995	1.2933	3.1831	0.3673
7924	CE(12:0)	Cholesterol Ester	CE Ester	54493	GC-FID	100010641		0.603	0.4484	0.9727	0.5726	0.7404	0.4417	0.8805	0.6175	2.6906	1.2172	0.8407	0.4661	1.0597	0.2892	0.5558	0.5085	1.1816	1.0483	0.7835	0.9944	4.1665	2.409	1.499	1.4302	1.0381	1.8521	1.0056
7932	CE(18:1)	Cholesterol Ester	CE Ester	54494	GC-FID	100010642		1.0776	1.3394	0.739	0.7909	0.7219	0.7475	0.9751	0.7869	1.4029	1.733	0.9859	1.0318	0.8167	0.7656	0.6389	1.0589	0.9718	1.0224	0.7132	1.0954	1.1212	1.3006	0.9627	0.7975	1.4451	1.2869	0.874
7940	CE(20:4)	Cholesterol Ester	CE Ester	54495	GC-FID	100010643		0.8946	0.9875	0.8924	1.081	1.1964	0.927	1.2338	0.7757	0.9083	1.9539	1.1151	1.119	0.9502	1.0818	0.6755	0.9357	1.4096	1.3533	0.8137	0.8055	1.5315	1.2663	0.8757	0.7743	1.0929	2.0774	1.0125
7950	CER(14:0)	Sphingolipids	Ceramide	54496	GC-FID	100010644		0.7767	0.98	1.1333	1.15	0.8567	1.0033	1.19	0.9	1.1467	1.26	1.0533	0.85	0.8233	0.79	0.71	0.8633	0.9467	1.27	0.7767	0.93	1.4033	0.8733	1.0333	0.9967	1.2467	1.0667	1.0433
7961	CER(26:0)	Sphingolipids	Ceramide	54497	GC-FID	100010645		0.9773	0.983	1.0057	0.9489	0.6193	0.7898	1.0682	0.7784	3.108	1.6761	0.6534	0.6534	0.9375	0.7102	1.0909	0.8807	1.4261	1.3182	0.9432	0.9545	1.2216	1.6761	1.2102	1.4034	0.9943	1.875	1.3068
8027	DAG(14:0/16:1)	Diacylglycerol	DAG Ester	54498	GC-FID	100010646		0.7345	0.9098	1.5722	0.8402	1.3892	0.9485	1.1675	1.3711	1.9175	5.2371	2.4046	1	1.0619	0.8299	1.1211	0.9046	0.8119	0.8273	0.7165	0.9948	1.6624	2.4021	1.3943	1.6314	0.9356	0.8222	0.7113
8036	DAG(14:0/22:6)	Diacylglycerol	DAG Ester	54499	GC-FID	100010647		0.3371	0.8146	3.3933	0.6348	1.4326	1.5787	1.2753	1.0169	1.2079	4.4382	1.5449	0.809	0.9382	1.1629	1.0618	1.0281	0.7191	0.736	0.3371	0.6348	2.1292	1	0.9045	0.3371	0.927	0.927	0.3371
8053	DAG(16:0/18:0)	Diacylglycerol	DAG Ester	54500	GC-FID	100010648		0.7236	1.241	1.8457	0.8835	1.8362	0.7484	0.7434	0.9752	1.9889	8.9236	2.6604	0.722	0.8618	0.893	0.9109	0.407	1.1697	0.8943	0.5579	1.0248	1.8034	1.8005	1.5521	1.8737	1.1324	0.9633	0.7244
8059	DAG(16:0/20:3)	Diacylglycerol	DAG Ester	54501	GC-FID	100010649		0.4685	1.5165	1.2698	0.6629	2.4062	0.7215	0.6791	1.0766	1.3296	8.8262	1.9514	0.9607	0.9745	1.0318	0.8374	0.4249	1.2648	1.0131	0.5994	0.9221	1.0467	2.3028	0.886	0.8436	1.1988	1.0168	0.4262
8061	DAG(16:0/20:5)	Diacylglycerol	DAG Ester	54502	GC-FID	100010650		0.4578	1.1544	2.6086	0.6086	1.5314	0.5386	0.5458	1.0072	0.763	18.1706	1.0251	0.4632	0.3303	1.5027	1.4434	1.0987	1.0754	0.7738	0.3698	0.3303	1.6068	0.9695	0.8725	0.8097	1.1795	1.5296	0.3303
8069	DAG(16:1/20:0)	Diacylglycerol	DAG Ester	54503	GC-FID	100010651		0.6186	0.6186	0.8893	0.6186	0.6186	0.6186	0.7813	0.9624	1.1796	2.5167	0.8245	0.6186	0.6186	0.6186	0.6186	0.6186	1.0983	0.6186	0.6186	0.6186	1.1477	1.0005	0.6186	0.6186	0.6186	0.6186	0.9995
8078	DAG(18:0/18:1)	Diacylglycerol	DAG Ester	54504	GC-FID	100010652		1.0527	1.7904	1.0031	1.0119	1.8183	0.7732	0.5384	1.0046	1.523	8.5167	1.3762	0.8146	0.6226	0.6834	1.3239	0.2252	0.9969	0.9966	0.3893	0.7762	1.2432	1.5089	1.2732	1.287	0.76	0.9206	0.3802
8097	DAG(18:2/20:5)	Diacylglycerol	DAG Ester	54505	GC-FID	100010653		0.5656	1.2993	3.9085	0.9666	1.9993	1.331	0.676	1.5505	0.612	22.6514	0.7365	0.7288	0.7647	2.6571	1.9297	3.5667	1.0165	1.528	0.8167	0.579	2.9075	1.3676	0.859	0.8252	1.3289	2.9328	0.23
8100	DAG(18:2/22:6)	Diacylglycerol	DAG Ester	54506	GC-FID	100010654		0.4134	0.6316	6.1791	0.6655	2.017	3.2309	1.2997	1.4576	0.9601	9.2233	0.8336	1.0467	0.2666	2.7581	1.0399	1.9601	0.7207	1.0705	0.8956	0.6986	5.3981	0.4321	0.3854	0.4355	1.4109	3.1469	0.2479
7893	FFA(12:0)	Free Fatty Acids	Saturated FFA	54508	GC-FID	100010656		1.1304	0.8527	1.0088	0.8296	1.0175	1.2082	1	1.1297	0.8389	0.7793	1.1661	1.0024	1.2974	0.8735	0.8206	0.919	0.874	1.0194	0.9356	1.0474	1	1.3696	0.9678	1.0426	0.8485	0.9443	1.0985
7922	FFA(22:5)	Free Fatty Acids	Polyunsaturated FFA (PUFA)	54509	GC-FID	100010657		0.8932	1.0074	0.9361	0.8236	1.1668	1.2788	0.9057	1.1936	0.7386	0.9479	1.0028	0.9312	1.109	0.9972	1.004	1.3148	1.0564	1.1812	0.8951	1.1606	1.1029	1.2027	0.9233	0.9822	0.9361	1.0072	1.1266
7986	HCER(20:1)	Sphingolipids	Hexosylceramide	54510	GC-FID	100010658		0.9717	0.6321	0.8491	1.3868	0.6321	0.6321	0.934	0.6321	1.3019	0.6321	0.6321	0.8868	1.1132	0.7358	0.6698	1.0377	1.2736	1.3585	0.7264	1	1.0472	1.1792	0.6321	1.217	1.8868	1.1321	1
7989	HCER(24:0)	Sphingolipids	Hexosylceramide	54511	GC-FID	100010659		1.1425	0.9201	0.7028	0.921	0.5471	0.7174	1.1513	0.8207	1.2995	1.1993	0.9782	0.5983	1.118	0.7847	0.4478	1.061	1.3003	0.8545	1.142	0.7443	1.2638	1.4898	0.9725	1.1103	1.3279	1.329	1.0218
7990	HCER(24:1)	Sphingolipids	Hexosylceramide	54512	GC-FID	100010660		1.1416	0.9209	0.9199	1.0978	0.4315	0.7079	1.2694	0.7091	1.2029	0.9426	0.9253	0.7698	1.0063	0.8592	0.6723	0.8285	1.341	1.0907	0.9772	0.6767	1.3167	1.5307	0.9951	1.0049	1.0232	1.1854	1.5635
6971	LPC(18:3)	Lysophosphatidylcholine	LPC Ester	54513	GC-FID	100010661		1	0.4815	0.4815	0.4815	0.4815	0.4815	0.4815	0.4815	0.4815	0.4815	0.4815	0.4815	0.4815	0.4815	1.0642	0.4815	0.522	0.4815	0.4815	0.4815	0.4815	0.4815	1.4717	1.2359	0.8318	0.4815	0.6085
7222	LPE(16:0)	Lysophosphatidylethanolamine	LPE Ester	54516	GC-FID	100010664		0.7038	1.3829	1.1594	0.5477	1.1899	0.4554	0.781	1.2849	0.8342	1.032	0.9889	1.002	1.2882	0.9725	1.853	0.6607	0.8961	1.2414	0.6271	0.9742	1.2498	1.2403	0.998	0.9915	0.9666	1.5673	0.9957
7228	LPE(18:3)	Lysophosphatidylethanolamine	LPE Ester	54517	GC-FID	100010665		1.4788	0.4303	0.4303	0.4303	0.4303	0.4303	0.4303	1.0424	0.4303	0.4303	0.4303	0.4303	0.4303	0.4303	0.9576	0.4303	0.4303	0.4303	0.4303	0.4303	0.4303	0.4303	2.3152	2.1394	0.4303	0.4303	0.4303
7240	LPE(22:5)	Lysophosphatidylethanolamine	LPE Ester	54519	GC-FID	100010667		0.9025	1.2231	0.7151	0.716	1.3664	0.5136	0.7835	1.3627	0.7245	1.4939	0.9185	0.6757	1.6129	1.3308	1.8997	0.7826	0.8838	1.4855	0.6111	1.5211	0.9775	2.3683	1.03	1.0478	1.1884	1.3074	0.9025
6766	PC(14:0/20:5)	Phosphatidylcholine	PC Ester	54523	GC-FID	100010671		1	1	1	1	1	1	1	1	1	1	1	1	1	1	1	1	1	1	1	1	1	1	1	1	1	1	1
6774	PC(15:0/18:1)	Phosphatidylcholine	PC Ester	54526	GC-FID	100010674		1.3713	0.9079	0.9345	1.0116	0.6583	0.6583	1.0363	0.8453	2.1189	1.2295	1.0201	1.1882	0.9563	0.8897	0.6583	0.7796	1.2472	1.2472	0.9884	0.7261	0.8625	2.2114	1.1023	0.9006	0.7317	0.9445	1.1689
6783	PC(16:0/12:0)	Phosphatidylcholine	PC Ester	54527	GC-FID	100010675		0.711	1.0573	0.7542	0.711	0.7334	0.786	0.8849	1.0425	0.711	0.711	0.711	0.711	0.9774	0.711	1.0929	1.1262	0.711	1.1099	0.711	0.711	1	1.2522	0.853	0.711	0.8955	1.2503	1.0955
6794	PC(16:0/20:2)	Phosphatidylcholine	PC Ester	54528	GC-FID	100010676		0.7193	0.9701	1.2985	0.6967	0.8704	0.9846	0.9024	0.8357	1.341	1.4033	1.5631	1.4539	0.7107	0.6074	0.4891	1.0606	1.0845	0.8016	0.8242	1.1057	1.1875	1.7473	1.0154	0.9805	1.0745	1.2785	0.669
6801	PC(16:0/22:5)	Phosphatidylcholine	PC Ester	54529	GC-FID	100010677		0.575	1.2471	1.2708	0.8507	0.9472	0.7738	0.7075	0.739	0.9786	1.7143	1.1875	0.926	0.866	1.0889	0.8612	0.6724	1.0396	1.0928	0.5143	1.0214	1.4372	1.8219	1.3107	0.9621	1.1211	1.4985	0.9739
6819	PC(18:0/18:1)	Phosphatidylcholine	PC Ester	54530	GC-FID	100010678		1.0435	1.1112	0.7429	0.7481	0.9135	0.6023	0.7533	0.9656	1.0537	1.6472	0.8539	0.9565	0.8474	0.6901	0.6699	0.8437	1.133	1.1105	0.628	1.218	0.963	1.2642	1.1066	1.0344	1.3278	1.187	0.9022
6826	PC(18:0/20:3)	Phosphatidylcholine	PC Ester	54531	GC-FID	100010679		0.6761	0.5398	1.1064	0.5847	0.9114	0.627	0.7372	1.2129	0.8967	1.2184	1.4858	1.1178	0.5484	0.5028	0.4012	0.8408	1.0494	1.0939	0.7032	1.2366	1.1824	1.5727	1.1154	1.1921	1.1973	1.4744	0.4556
6842	PC(18:1/20:3)	Phosphatidylcholine	PC Ester	54532	GC-FID	100010680		1.1824	0.8512	1.0107	1.1264	0.708	0.5976	0.9603	0.7462	1.1584	1.0779	1.4234	1.4131	0.6883	0.3958	0.5386	0.9399	0.924	1.0576	0.8258	1.5259	0.7484	1.1765	1.0149	0.9893	1.3842	1.089	0.5252
6858	PC(18:2/20:4)	Phosphatidylcholine	PC Ester	54533	GC-FID	100010681		1.021	0.9251	0.8595	1.052	0.9137	0.7066	1.0922	0.6122	0.8788	1.4682	0.9425	0.9733	1.2142	0.6643	0.6798	1.1983	1.0085	1.246	0.8266	0.992	1.008	0.9664	1.0934	1.0752	0.8133	1.3138	0.8517
6992	PE(14:0/18:1)	Phosphatidylethanolamine	PE Ester	54538	GC-FID	100010686		1	1	1	1	1	1	1	1	1	1	1	1	1	1	1	1	1	1	1	1	1	1	1	1	1	1	1
7039	PE(16:0/20:3)	Phosphatidylethanolamine	PE Ester	54543	GC-FID	100010691		0.6048	1.2022	1.2307	0.6048	1.7596	0.6048	0.6048	0.9895	0.6048	2.161	2.136	0.9719	0.8175	0.6333	0.9671	0.6048	0.8333	0.8811	0.6048	0.8675	1.0105	1.5754	1.0965	0.6759	0.7833	1.0553	0.6048
7040	PE(16:0/20:4)	Phosphatidylethanolamine	PE Ester	54544	GC-FID	100010692		0.3071	1.9275	0.9877	0.6203	1.4876	0.7229	0.6358	0.8407	0.7928	3.1703	1.5896	1.2293	1.1363	0.6541	1.0715	0.5868	1.1759	1.3814	0.5399	0.6985	1.0031	1.626	0.9969	1.015	0.7921	1.3507	0.4947
7067	PE(18:0/14:0)	Phosphatidylethanolamine	PE Ester	54546	GC-FID	100010694		1	1	1	1	1	1	1	1	1	1	1	1	1	1	1	1	1	1	1	1	1	1	1	1	1	1	1
7073	PE(18:0/18:0)	Phosphatidylethanolamine	PE Ester	54547	GC-FID	100010695		1.2994	0.9867	0.8617	0.7745	1.0833	1.1036	1.0651	0.8186	0.8463	2.0221	1.1474	1.034	0.9373	0.9793	0.7493	1.9405	1.1964	1.4174	0.6831	0.8659	1.2931	0.6131	0.9335	0.951	1.3585	1.7272	0.9037
7074	PE(18:0/18:1)	Phosphatidylethanolamine	PE Ester	54548	GC-FID	100010696		0.908	1.6668	0.8515	0.7153	1.8535	0.4765	0.7239	1.1799	1.2775	3.6511	1.5111	0.8965	0.8982	0.6447	1.0974	0.7331	1.2799	0.899	0.4273	0.789	0.7981	1.2483	1.225	1.3283	0.6936	1.092	0.5148
7080	PE(18:0/20:3)	Phosphatidylethanolamine	PE Ester	54549	GC-FID	100010697		0.4726	1.1557	1.3627	0.4837	1.2253	0.5012	0.508	1.0903	0.9504	2.7073	1.9776	0.9092	0.4764	0.4669	0.7192	0.9765	1.0235	1.0572	0.6284	0.802	1.0959	1.7219	1.0432	1.1559	0.6937	1.136	0.3441
7089	PE(18:1/16:1)	Phosphatidylethanolamine	PE Ester	54550	GC-FID	100010698		0.7511	0.9835	0.7511	0.7511	0.7511	0.7511	0.7511	0.7511	1.0477	1.5082	0.7511	0.7511	0.9089	0.7511	0.8092	0.7511	0.7511	1.2775	0.7511	0.7511	0.7511	1	0.7511	0.7511	0.8734	0.7511	1.1275
7091	PE(18:1/18:2)	Phosphatidylethanolamine	PE Ester	54551	GC-FID	100010699		1.8443	1.3241	0.8251	0.9577	1.6029	0.3685	0.7205	0.849	1.7779	2.7721	1.0409	0.952	0.9578	0.4226	1.4748	1.0905	1.0808	1.0151	0.4729	0.6002	0.6364	0.7389	1.5849	1.4748	0.773	0.9849	0.4503
7113	PE(18:2/20:4)	Phosphatidylethanolamine	PE Ester	54555	GC-FID	100010703		0.791	0.791	0.791	0.791	0.8806	0.791	1.0009	0.9125	0.791	1.596	0.791	0.791	0.791	0.791	0.791	0.791	0.9325	0.923	0.791	0.791	0.791	1.0161	1.0302	0.791	0.791	1.1051	0.791
7165	PE(P-16:0/18:2)	Phosphatidylethanolamine	PE Plasmalogen	54561	GC-FID	100010709		2.0126	0.929	0.5017	0.7376	0.6445	0.6604	0.5671	0.9372	1.2741	1.0429	0.6409	0.6348	0.8824	0.4039	0.7067	1.8104	1.6105	1.6677	0.8019	1.2973	0.9365	1.4947	1.1981	0.9844	2.0057	1.5013	1.7993
7172	PE(P-16:0/20:5)	Phosphatidylethanolamine	PE Plasmalogen	54562	GC-FID	100010710		1.3877	0.5051	0.8813	0.5051	0.6779	0.5051	0.6586	0.7979	0.6699	1.986	0.6147	0.5051	0.5051	0.7039	1.2428	1	1.0962	1.5762	0.5051	0.8074	1.807	0.8401	0.5051	0.8223	2.4358	1.8714	1.1716
7189	PE(P-18:0/20:3)	Phosphatidylethanolamine	PE Plasmalogen	54564	GC-FID	100010712		1.7418	1.0468	0.7554	0.5991	0.9718	0.7366	0.5953	0.8878	1.0282	1.8504	0.9693	0.9002	0.701	0.5898	0.5077	1.6024	1.2383	1.5011	0.5861	1.4566	0.9099	1.6219	0.8859	0.8406	1.9658	1.0318	1.1669
7198	PE(P-18:1/16:0)	Phosphatidylethanolamine	PE Plasmalogen	54565	GC-FID	100010713		1.1192	1.4145	0.7716	0.8579	1.1443	0.5393	0.8969	1.2914	0.9582	2.0201	0.966	1.1398	0.7593	1.0284	1.5226	0.888	0.9649	1	0.5393	1.0741	0.7075	0.8914	0.7911	0.9437	1.3036	1.2396	1.4223
7212	PE(P-18:1/22:4)	Phosphatidylethanolamine	PE Plasmalogen	54567	GC-FID	100010715		1.0399	0.8813	0.5909	0.8912	0.7389	0.6841	1.2651	0.819	0.8026	1.1537	0.8263	1.1358	1.4102	0.5909	0.5909	1.2231	1.301	0.8448	0.6241	1.0815	0.9912	1.2477	1.0546	0.8962	1.3628	1.3362	1.0088
7495	PI(16:0/16:0)	Phosphatidylinositol	PI Ester	54568	GC-FID	100010716		0.5384	0.5384	1.4909	0.4079	0.6396	0.6975	0.726	0.7544	1.3568	1.6929	2.6138	1.5904	1.1798	0.4079	0.4079	0.7838	1.8129	0.6116	0.4079	1.1457	1.1238	3.7428	1.0046	0.9954	0.6896	0.9275	0.7159
7531	PI(18:0/16:1)	Phosphatidylinositol	PI Ester	54569	GC-FID	100010717		1.1727	0.7775	1.6439	0.8834	0.7426	0.6347	1.0063	0.7209	0.731	1.538	4.1867	1.8839	0.6759	0.4349	0.434	0.4557	1.3053	0.9197	0.6444	1.6763	1	2.7078	1.1887	1.1993	1.2898	0.8283	0.6323
8012	SM(22:1)	Sphingolipids	Sphingomyelin	54570	GC-FID	100010718		1.2121	0.9378	0.879	0.9613	0.7656	0.7427	0.976	0.799	1.4629	1.5393	1.005	1.1098	0.939	0.6717	0.5739	1.4053	1.1305	1.2499	0.8184	0.9285	0.9567	1.1505	1.1953	1.084	1.1508	1.3523	0.8346
8482	TAG44:1-FA16:1	Triacylglycerol	TAG Ester	54571	GC-FID	100010719		0.6806	0.2876	2.4355	0.4332	1.2507	0.3721	0.7616	1.1121	5.8719	7.1721	6.9688	0.3994	0.8978	0.4122	1.1278	0.2114	0.7179	0.6405	0.3261	0.4378	2.1316	3.4405	2.6469	2.2247	1.1022	0.538	0.3953
8512	TAG45:0-FA16:0	Triacylglycerol	TAG Ester	54572	GC-FID	100010720		1.0312	0.4184	4.1237	0.4349	1.0183	0.3347	1.2693	1.3636	15.9316	10.5622	3.1986	0.462	0.8662	0.5657	0.693	0.3618	0.9817	0.8214	0.2051	0.5527	1.7148	3.4944	2.8427	2.8533	0.8992	0.5775	0.462
8520	TAG45:1-FA16:0	Triacylglycerol	TAG Ester	54573	GC-FID	100010721		0.8891	0.6307	2.7059	0.5092	1.19	0.4822	0.9103	1.6779	7.73	9.5448	2.7387	0.4783	0.7001	0.7329	1.1938	0.4879	1.0588	0.9412	0.4282	0.6326	1.4696	3.1745	2.893	3.2787	0.9045	0.6326	0.4031
8561	TAG46:2-FA14:1	Triacylglycerol	TAG Ester	54574	GC-FID	100010722		0.7472	0.3557	2.256	0.4933	1.3915	0.4037	0.5632	1.3627	5.7685	7.5611	2.6341	0.6331	0.6896	0.6395	0.9893	0.2059	1.0107	0.8688	0.3744	0.6032	1.4848	3.3643	2.9237	2.7541	1.0869	0.7088	0.2192
8577	TAG46:3-FA18:1	Triacylglycerol	TAG Ester	54575	GC-FID	100010723		1.5443	0.5404	2.3362	0.6021	2.2038	0.2485	0.8651	1.3085	5.6362	13.0289	1.2732	0.3489	0.5319	0.6877	1.5094	0.2864	1.077	0.8102	0.4651	0.4183	0.923	1.2055	3.6643	3.126	0.4774	0.6328	0.2226
8578	TAG46:3-FA18:2	Triacylglycerol	TAG Ester	54576	GC-FID	100010724		0.9641	0.3502	3.2069	0.6723	1.673	0.405	0.702	1.5885	4.895	9.9911	2.9714	0.4212	0.6624	0.7782	1.5173	0.3346	1.0359	0.8776	0.7148	0.4504	1.878	1.6378	3.2766	2.8807	0.5865	0.8911	0.1914
8616	TAG47:1-FA16:1	Triacylglycerol	TAG Ester	54577	GC-FID	100010725		0.6593	0.6371	1.8425	0.7386	1.1704	0.5928	0.5356	1.993	4.804	7.9953	3.5368	0.8471	0.9417	0.6733	0.734	0.6733	1.1459	1.0128	0.3897	0.5473	1.9265	5.3956	3.1272	3.063	1.0303	0.748	0.4131
8619	TAG47:1-FA18:1	Triacylglycerol	TAG Ester	54578	GC-FID	100010726		1.0379	0.5318	2.7353	0.5952	0.8765	0.4143	0.9197	0.9621	7.7004	8.2758	2.2116	0.7796	0.7193	0.6831	1.1492	0.1817	1.0803	1.055	0.3762	0.645	1.9362	2.1187	2.2536	2.0214	0.7617	0.8699	0.3501
8627	TAG47:2-FA16:1	Triacylglycerol	TAG Ester	54579	GC-FID	100010727		0.6301	0.3394	1.9837	0.6585	1.1016	0.6057	0.5854	1.4797	3.6382	5.7866	3.2337	0.7703	0.687	0.7886	1.0264	0.6341	0.7581	0.998	0.5305	0.7581	2.002	4.7663	2.2663	2.6057	1.063	1.002	0.3455
8630	TAG47:2-FA18:2	Triacylglycerol	TAG Ester	54580	GC-FID	100010728		0.5572	0.2561	3.8662	0.6788	0.8437	0.6423	0.7743	1.0876	5.4745	7.6813	1.7032	0.6563	0.6618	1.0438	0.7263	0.3236	1.1004	0.9562	0.6916	0.4319	2.8297	1.7926	2.3571	2.2445	0.7348	1.1156	0.278
8656	TAG48:0-FA16:0	Triacylglycerol	TAG Ester	54581	GC-FID	100010729		0.3621	0.6984	2.1066	0.5085	2.917	0.4611	0.6033	1.2889	4.3027	20.3239	6.1269	0.5288	1.1188	0.5572	0.6553	0.1798	0.8812	0.6328	0.1348	0.4187	1.688	3.1833	2.4249	2.2403	1.6491	0.8524	0.2675
8675	TAG48:2-FA12:0	Triacylglycerol	TAG Ester	54582	GC-FID	100010730		1.2458	0.7127	2.2607	1.0116	1.4736	0.4059	0.6518	1.1031	3.3987	6.469	5.0417	0.6489	0.8086	0.5582	3.4099	0.2009	0.9791	0.7684	0.7202	0.6017	2.0554	1.3584	2.0991	1.9882	0.5762	0.9884	0.4797
8677	TAG48:2-FA14:0	Triacylglycerol	TAG Ester	54583	GC-FID	100010731		0.4311	0.5262	2.8918	0.6699	1.5546	0.8458	0.5315	1.1074	2.6809	10.6061	2.3882	0.8012	0.7973	0.961	0.9855	0.39	1.0412	0.9373	0.5985	0.6547	2.6731	2.0303	2.4028	2.2476	1.2151	1.3289	0.2404
8684	TAG48:2-FA18:1	Triacylglycerol	TAG Ester	54584	GC-FID	100010732		0.9152	0.753	1.9456	0.8901	1.659	0.5399	0.6555	1.1828	3.3695	7.6856	3.688	0.8213	0.818	0.6896	2.4032	0.223	1.1243	0.9843	0.6678	0.696	1.8734	1.9666	2.0528	1.8716	0.9128	1.0453	0.3921
8698	TAG48:3-FA18:1	Triacylglycerol	TAG Ester	54585	GC-FID	100010733		0.8959	0.4907	2.6506	0.7873	1.4128	0.475	0.5897	1.3263	2.7024	6.4531	3.76	0.5867	0.7072	0.7485	2.3381	0.3538	0.9721	0.7668	1.0602	0.5399	2.2704	1.2764	2.1655	2.0264	0.5383	1.1717	0.2992
8845	TAG50:2-FA16:0	Triacylglycerol	TAG Ester	54586	GC-FID	100010734		0.3183	0.9528	1.8141	0.8054	2.2579	1.173	0.4782	1.3189	2.0672	11.2822	2.157	0.9874	0.9769	0.9554	0.9108	0.3954	1.1138	1.0126	0.5138	0.6656	2.1749	2.3199	2.2296	1.9619	1.4759	1.6276	0.3856
8858	TAG50:3-FA14:1	Triacylglycerol	TAG Ester	54587	GC-FID	100010735		1.3154	1.2924	1.2364	0.8529	1.5887	0.5533	0.6795	1.216	3.1919	7.5207	0.972	1.0446	0.4692	0.7974	1.7427	0.3391	1.0554	0.8386	0.7263	0.8502	0.9857	1.2475	1.6368	1.5092	0.6838	0.8369	0.328
8870	TAG50:3-FA20:3	Triacylglycerol	TAG Ester	54588	GC-FID	100010736		0.2361	0.5685	2.6746	0.3431	1.847	0.4282	0.4109	1.167	1.9202	9.8067	2.6454	0.4842	0.863	1.1115	0.5644	0.1876	1.1436	0.7141	0.4295	0.5261	2.1119	2.2007	1.3805	1.2332	1.2357	1.028	0.2456
8873	TAG50:4-FA14:0	Triacylglycerol	TAG Ester	54589	GC-FID	100010737		0.471	0.4925	3.2961	0.8934	1.257	1.1984	0.6001	1.1717	1.883	6.9594	0.9404	0.9757	0.5238	1.4829	1.3057	1.242	0.9541	1.0243	1.9955	0.7203	3.4112	0.9626	1.9526	1.8742	0.7547	2.1876	0.2025
8899	TAG50:5-FA20:4	Triacylglycerol	TAG Ester	54590	GC-FID	100010738		0.537	0.4257	2.5438	0.6008	1.5567	0.4745	0.6062	1.6341	1.2091	7.3761	2.8764	0.5506	0.8697	1.5492	1.2892	0.2845	1.0319	0.8669	0.6382	0.3469	1.7325	1.7529	1.3978	1.4182	0.7671	1.2016	0.3585
8951	TAG51:1-FA18:0	Triacylglycerol	TAG Ester	54591	GC-FID	100010739		0.9066	1.04	1.5861	0.7305	1.2487	0.5019	0.6351	1.0681	4.1377	10.9555	1.6415	0.7142	0.5785	0.6311	0.96	0.2152	0.9565	1.0897	0.3161	0.6678	1.4883	2.2122	2.0951	2.009	0.8183	0.9156	0.5072
8965	TAG51:2-FA18:0	Triacylglycerol	TAG Ester	54592	GC-FID	100010740		0.7665	0.8545	1.5505	0.9259	1.0977	0.8569	0.8143	1.19	2.4486	5.7719	1.1573	0.9295	0.7946	0.9537	0.9059	0.6742	1.0535	0.9767	0.7671	0.7305	1.6915	1.6528	1.7852	1.6295	0.8388	1.1703	0.6706
8975	TAG51:3-FA15:0	Triacylglycerol	TAG Ester	54593	GC-FID	100010741		0.6067	0.8034	1.6891	1.0489	1.025	0.8843	0.6858	1.1346	2.9954	6.5176	0.7738	1.2202	0.6484	1.1118	0.8661	0.4945	1.1293	1.284	0.975	0.6566	1.9976	1.3569	1.6482	1.4622	0.5823	1.5775	0.4597
9076	TAG52:3-FA18:1	Triacylglycerol	TAG Ester	54594	GC-FID	100010742		0.4811	1.1639	1.3144	1.0183	1.5872	1.141	0.5451	1.0651	1.6827	5.8107	0.9549	1.1807	0.6264	0.9467	1.1114	0.5868	0.9599	0.9817	0.8979	0.6886	1.5465	1.1214	1.4286	1.335	0.9216	1.5558	0.432
9082	TAG52:3-FA20:3	Triacylglycerol	TAG Ester	54595	GC-FID	100010743		0.1976	0.9608	1.592	0.4905	2.4033	0.5943	0.3762	1.2347	1.2944	11.0336	2.4598	0.6166	0.9804	1.1621	0.625	0.2854	1.0196	0.7729	0.3797	0.6389	1.7203	2.583	1.3494	1.241	1.2852	1.2172	0.3013
9085	TAG52:4-FA14:0	Triacylglycerol	TAG Ester	54596	GC-FID	100010744		0.365	0.6486	2.7323	0.5845	1.6863	0.7397	0.5013	1.265	1.9241	7.0963	1.5832	0.7595	0.7577	1.2598	1.0204	0.511	1.1227	0.95	1.0272	0.7852	2.4571	1.45	1.3953	1.3119	0.9796	1.4417	0.2593
9093	TAG52:4-FA18:2	Triacylglycerol	TAG Ester	54597	GC-FID	100010745		0.3238	0.6221	1.8978	1.0455	1.5399	1.458	0.4811	1.2591	1.4801	6.3997	0.6772	0.9113	0.5493	1.2298	0.8294	1.0027	0.8696	1.0549	1.3492	0.6812	2.2996	0.9973	1.6075	1.5803	0.8405	2.1195	0.2936
9100	TAG52:4-FA22:1	Triacylglycerol	TAG Ester	54598	GC-FID	100010746		0.3942	0.8671	1.2779	1.031	1.6138	1.2527	0.5097	1.0961	1.5247	7.3921	0.7301	1.2085	0.4777	1.1575	0.9948	0.6288	0.8517	0.9745	1.0605	0.6927	1.626	1.0052	1.7685	1.6082	0.8265	1.8317	0.323
9125	TAG52:6-FA16:0	Triacylglycerol	TAG Ester	54599	GC-FID	100010747		0.5255	0.9921	2.1318	0.5682	2.2811	0.6926	0.6383	1.0271	1.3854	12.1329	0.8513	1.0079	0.53	1.6492	1.5972	0.5799	1.5841	1.4657	0.5129	0.5007	1.7914	0.9463	2.813	2.4503	1.1376	2.3285	0.2635
9153	TAG52:7-FA22:6	Triacylglycerol	TAG Ester	54600	GC-FID	100010748		0.9461	0.5315	8.436	0.7112	1.8528	1.5303	1.5517	1.9157	1.9719	8.6281	3.8169	0.9989	0.6303	2.7112	2.509	0.9101	0.9573	0.9438	0.7427	0.7618	6.209	0.8955	1.0011	0.9247	1.8517	1.9	0.4483
9173	TAG53:0-FA16:0	Triacylglycerol	TAG Ester	54601	GC-FID	100010749		0.3618	0.7622	2.7663	0.6547	1.8714	1.0353	0.6828	1.174	1.0422	10.7262	0.8942	0.7338	0.5351	2.2909	1.4766	1.6131	0.9468	1.2176	0.5255	0.4505	2.5599	0.9647	1.2375	1.1408	1.1861	2.2822	0.2392
9183	TAG53:1-FA16:0	Triacylglycerol	TAG Ester	54602	GC-FID	100010750		1.3128	0.9457	1.2972	0.8273	2.0318	0.4044	0.6373	1.0368	2.6762	11.3935	1.8463	0.5046	0.6843	0.8789	0.958	0.3204	0.9758	1.0131	0.25	0.5195	1.2674	1.4487	1.6202	1.7007	0.9421	1.1033	0.3447
9187	TAG53:1-FA18:1	Triacylglycerol	TAG Ester	54603	GC-FID	100010751		1.0323	1.2835	1.1121	0.922	1.3871	0.5348	0.5903	0.9021	2.9502	9.6892	1.1956	0.7786	0.5529	0.7392	1.2804	0.303	0.9677	1.0418	0.3862	0.6485	1.1771	1.4274	1.5156	1.3747	0.7284	1.0735	0.4966
9337	TAG54:3-FA18:0	Triacylglycerol	TAG Ester	54604	GC-FID	100010752		0.7163	1.3131	1.2905	1.1778	2.0804	1.0031	0.5596	1.0581	2.2734	9.9075	0.8677	0.8851	0.4953	0.9969	1.3861	0.7521	0.9767	1.1602	0.8806	0.7629	1.5444	0.9571	1.6978	1.5612	0.8516	1.7079	0.4298
9340	TAG54:3-FA18:3	Triacylglycerol	TAG Ester	54605	GC-FID	100010753		1.0015	1.3067	0.9985	0.8367	1.9619	0.8148	0.9496	0.9748	1.6733	7.917	0.8504	1.0207	0.6444	0.9296	1.4726	0.7556	1.0474	1.0422	0.7115	0.7867	1.2174	0.9919	2.0504	1.9256	0.9226	1.4837	0.63
9383	TAG54:5-FA22:5	Triacylglycerol	TAG Ester	54606	GC-FID	100010754		0.2801	0.9359	2.596	0.6404	2.1039	1.115	0.6221	1.0983	1.6912	12.3542	2.5352	0.8633	0.7707	1.7414	0.8202	0.5033	1.0553	1.0195	0.4174	0.6148	2.6809	1.4778	1.0978	0.9805	1.5971	1.5076	0.4418
9400	TAG54:6-FA20:5	Triacylglycerol	TAG Ester	54607	GC-FID	100010755		0.3996	1.8363	3.0721	0.7899	2.3869	0.8344	0.8054	1.4152	1.0548	15.0663	0.8612	0.9132	0.7638	2.5941	2.7496	1.6398	1.2987	1.5884	0.5201	0.5494	2.2421	1.2864	0.9452	0.9114	1.3955	2.4192	0.356
9404	TAG54:6-FA22:6	Triacylglycerol	TAG Ester	54608	GC-FID	100010756		0.3407	0.9731	7.0433	0.655	2.2743	2.233	1.1038	1.2149	1.7526	17.9828	2.7599	1.1881	0.5194	2.8456	1.1399	0.9687	0.905	0.9785	0.3989	0.6077	5.6646	0.8993	0.9034	0.8255	2.92	2.5284	0.3955
9421	TAG54:7-FA22:6	Triacylglycerol	TAG Ester	54609	GC-FID	100010757		0.378	0.6225	5.209	0.6788	1.9705	1.868	1.1767	1.2474	1.3026	8.1997	1.929	1.2144	0.3997	2.6892	1.3977	0.9706	0.7932	1.015	0.6526	0.6367	5.415	0.6926	0.6341	0.6217	1.9783	2.4318	0.2927
9463	TAG55:1-FA18:1	Triacylglycerol	TAG Ester	54610	GC-FID	100010758		0.944	1.1669	2.1688	0.8095	1.8696	0.8588	0.9363	1.1634	1.1634	11.7232	0.6392	0.9395	0.5383	1.9142	2.1433	1.9654	0.9662	1.073	0.705	0.5459	1.842	0.7095	0.9907	0.8625	1.0093	2.0274	0.3937
9503	TAG55:4-FA18:1	Triacylglycerol	TAG Ester	54611	GC-FID	100010759		1.1294	1.2193	0.9973	1.0007	2.2016	0.6261	0.6518	1.1891	2.1882	11.7851	1.2652	0.8797	0.6811	0.9462	1.3132	0.4948	1.1307	1.0619	0.7295	0.7111	1.1997	0.9993	1.4017	1.399	0.5645	1.1165	0.5065
9629	TAG56:3-FA16:0	Triacylglycerol	TAG Ester	54612	GC-FID	100010760		0.4719	1.0386	2.5894	0.6566	1.9815	0.6734	0.4332	1.0831	1.9127	13.5449	1.3426	0.9362	0.8463	0.9614	1.1495	0.2905	1.0714	0.7901	0.4291	0.649	1.5709	1.4736	1.3678	1.398	1.0647	1.1478	0.424
9631	TAG56:3-FA18:0	Triacylglycerol	TAG Ester	54613	GC-FID	100010761		0.8403	1.3299	1.6596	1.0147	2.297	0.9558	0.6031	1.0474	2.0744	8.8118	1.1768	0.8895	0.5475	0.9795	1.2927	0.4643	0.9853	1.0591	0.6251	0.9008	1.4253	1.1445	1.336	1.1671	0.9183	1.3529	0.4524
9643	TAG56:4-FA16:0	Triacylglycerol	TAG Ester	54614	GC-FID	100010762		0.4116	1.2195	1.3116	0.659	2.3384	0.7733	0.4739	1.3092	1.2987	8.9	1.759	0.9378	0.8373	1.1193	0.7833	0.2716	1.1141	0.9547	0.5528	0.7298	1.7518	1.7823	1.1728	1.1885	1.0453	1.3736	0.5834
9654	TAG56:4-FA20:4	Triacylglycerol	TAG Ester	54615	GC-FID	100010763		0.581	1.5453	1.4954	0.9563	2.8637	1.4814	0.9112	1.1835	1.4896	10.3727	1.0588	0.8425	0.6107	1.6183	1.1859	0.6131	1.0092	1.6518	0.6163	0.667	1.6929	1.0888	0.8	0.9043	0.9908	1.6637	0.7177
9660	TAG56:5-FA16:0	Triacylglycerol	TAG Ester	54616	GC-FID	100010764		0.3397	1.3248	1.588	0.776	2.474	0.9586	0.5536	1.2699	1.2742	9.8636	1.3017	0.7986	0.8163	1.4605	0.7734	0.3522	1.2672	1.2476	0.6715	0.6737	1.688	1.6987	1.0414	0.9327	1.0812	1.5831	0.5802
9679	TAG56:6-FA16:0	Triacylglycerol	TAG Ester	54617	GC-FID	100010765		0.3113	1.5035	2.1834	0.9017	2.1371	1.1427	0.6731	1.0928	1.3142	8.3532	0.965	0.8101	0.6907	2.0233	1.1604	0.6412	1.0272	1.5076	0.6708	0.659	2.3344	1.2972	0.9728	0.9146	1.1989	2.0572	0.5204
9690	TAG56:6-FA20:4	Triacylglycerol	TAG Ester	54618	GC-FID	100010766		0.7043	1.4501	1.3721	1.0596	2.3421	1.128	0.8624	1.2882	1.0811	9.7002	0.7141	1.0438	0.7003	1.6289	1.3184	0.7617	1.099	1.3519	0.901	0.6209	1.4841	0.9562	0.8471	0.8119	0.8331	1.7647	0.5312
9714	TAG56:7-FA22:6	Triacylglycerol	TAG Ester	54619	GC-FID	100010767		0.3351	1.0396	3.7523	0.5885	2.039	1.8175	1.0565	1.0307	1.0266	8.469	1.066	1.103	0.2718	2.3833	1.0957	0.8497	0.6383	0.9734	0.4471	0.5649	3.546	0.3856	0.4114	0.3628	1.5722	2.2237	0.3338
9730	TAG56:8-FA22:5	Triacylglycerol	TAG Ester	54620	GC-FID	100010768		0.4911	0.8172	2.4909	0.987	2.1392	1.4163	0.8511	1.1631	1.1815	7.2805	1.013	0.9488	0.5175	2.7167	1.3972	1.2239	1.0588	1.2874	0.9666	0.8472	3.1239	0.8577	0.9284	0.9038	1.2033	2.5175	0.3552
9739	TAG56:9-FA18:3	Triacylglycerol	TAG Ester	54621	GC-FID	100010769		0.4974	0.8756	1.8432	0.6591	2.3092	0.8483	0.9328	1.3971	0.6005	9.9442	0.4888	0.9521	0.6391	2.3685	1.6212	0.9924	1.2144	1.3337	1.0521	0.4454	2.02	0.9435	1.1413	0.9697	1.0283	3.0803	0.3451
9742	TAG56:9-FA20:4	Triacylglycerol	TAG Ester	54622	GC-FID	100010770		0.4841	0.7982	1.1834	0.6507	1.8389	0.5494	0.7677	1.5656	0.4366	11.0051	0.5159	0.8477	0.9273	1.9676	1.1232	1	1.1826	1.2397	1	0.3581	1.412	1.0806	1.2115	1.0143	0.7331	2.3625	0.355
10000	TAG58:7-FA22:4	Triacylglycerol	TAG Ester	54623	GC-FID	100010771		0.5667	1.004	1.4716	0.996	2.0306	1.0753	0.7481	1.2341	0.9838	6.9233	0.7426	1.0068	0.737	1.7306	1.1371	0.817	1.2397	1.215	1.4532	0.6066	1.6666	1.0332	0.9324	0.8051	0.7666	1.8568	0.4227
10027	TAG58:9-FA18:2	Triacylglycerol	TAG Ester	54624	GC-FID	100010772		0.5197	0.7192	3.3938	0.84	1.7385	1.5452	1.1952	1.1875	0.921	9.682	0.7358	0.9864	0.455	2.7695	1.3994	2.1795	0.7656	1.025	1.1108	0.5514	3.3386	0.4571	0.6252	0.5584	1.0136	2.4277	0.3775
6735	Total CE	Neutral Complex Lipids SUM	Cholesteryl Esters	54657	GC-FID	100010820		1.0064	1.0012	0.8479	0.8844	0.7636	0.8341	1.0363	0.8094	1.3811	1.6401	1.0027	0.9713	0.9099	0.7704	0.5964	1.1312	1.1533	1.1477	0.7954	0.9988	1.3055	1.2998	1.1128	0.9696	1.3044	1.574	0.8359
6738	Total TAG	Neutral Complex Lipids SUM	Triacylglycerols	54658	GC-FID	100010821		0.5578	1.1931	1.436	0.9639	1.7453	1.0029	0.5677	1.0673	1.865	7.591	1.2173	1.0184	0.6249	0.9971	1.2308	0.5823	0.9695	0.9891	0.8483	0.6809	1.6231	1.2268	1.4912	1.3782	0.9242	1.5243	0.4173
6736	Total DAG	Neutral Complex Lipids SUM	Diacylglycerols	54659	GC-FID	100010822		0.5336	1.179	1.5494	0.9155	1.8624	1.1099	0.5911	1.0929	1.5198	7.8042	1.1446	0.978	0.7228	0.9117	0.9829	0.5525	1.0193	1.0171	0.8491	0.7281	1.7168	1.451	1.2603	1.1784	0.8349	1.4991	0.3594
6734	Total FFA	Neutral Complex Lipids SUM	Free Fatty Acids	54660	GC-FID	100010823		0.8735	1.064	0.9655	0.9136	1.2876	1.2474	0.9691	1.0488	0.8528	0.9882	0.8926	1.0118	1.1174	0.942	0.7501	1.1153	0.9485	1.1012	0.8951	1.2047	1.1475	1.4209	0.9483	1.0478	1.0765	1.2245	1.2644
6723	Total PC	Phospholipid SUM	Phosphatidylcholines	54661	GC-FID	100010824		0.8972	1.0653	0.9605	0.839	0.9921	0.7526	0.8563	0.7735	1.0629	1.8104	1.0592	0.9453	0.907	0.7233	0.6878	1.0293	1.0431	1.1808	0.7118	0.9119	1.0899	1.0835	1.1749	1.1146	1.0079	1.3037	0.8317
6725	Total PE	Phospholipid SUM	Phosphatidylethanolamines	54662	GC-FID	100010825		1.0434	1.1217	0.9018	0.7343	1.2323	0.7845	0.7749	0.8593	0.8125	2.3373	1.0277	0.8829	0.7284	0.7284	0.7893	1.0305	1.3133	1.3663	0.5711	0.9344	1.0626	0.9782	0.9531	0.8864	1.1991	1.4866	1.0218
6727	Total PI	Phospholipid SUM	Phosphatidylinositols	54663	GC-FID	100010826		0.9413	1.049	1.3045	0.9038	0.9666	0.8102	0.714	0.7156	1.1175	1.9504	1.0993	1.1255	0.9687	0.6172	0.6319	1.0072	1.1808	0.8801	1.0788	0.9832	0.9928	1.5597	1.4947	1.4473	0.8949	1.3887	0.7423
6724	Total LPC	Phospholipid SUM	Lysophosphatidylcholines	54664	GC-FID	100010827		1.0522	1.1033	0.9864	0.8512	0.9793	0.644	0.9557	1.0846	0.9793	1.0646	0.8219	0.7695	1.1684	0.9339	1.2675	0.9115	0.8888	0.8615	0.7808	1.0023	1.0535	1.1697	0.9977	1.0219	1.0176	1.3083	0.9823
6726	Total LPE	Phospholipid SUM	Lysophosphatidylethanolamines	54665	GC-FID	100010828		1.1248	1.2635	0.8689	0.747	1.1797	0.4153	0.8865	1.3695	0.8103	1.1574	0.8788	0.7293	1.406	0.9071	1.7229	0.7886	0.8404	1.203	0.6388	1.0827	0.915	1.2974	1.0306	0.9694	0.9202	1.2601	0.8631
6732	Total SM	Sphingolipid SUM	Sphingomyelins	54666	GC-FID	100010829		1.0647	0.9374	0.8353	0.8333	0.7885	0.8028	1.0271	0.7976	1.4766	1.5223	0.9007	1.0189	0.9543	0.7258	0.6581	1.2642	1.1554	1.1271	0.8094	0.881	1.0521	1.2158	1.1419	1.0924	1.1498	1.3605	0.9268
6728	Total CER	Sphingolipid SUM	Ceramides	54667	GC-FID	100010830		1.058	1.2736	0.8614	0.9449	1.0056	0.9944	1.1237	0.7863	2.1026	3.1034	0.7482	0.7405	0.9933	0.7743	0.7259	1.1943	1.0988	1.1579	0.9471	0.9715	1.3628	1.5284	1.1762	1.0789	1.3817	1.7396	0.7379
6730	Total HCER	Sphingolipid SUM	Hexosylceramides	54668	GC-FID	100010831		1.1197	0.8914	0.782	1.0135	0.4898	0.7011	1.2332	0.7391	1.3247	1.1595	0.8337	0.7253	0.9865	0.806	0.497	1.0267	1.2532	0.9131	1.0218	0.7622	1.2118	1.573	0.96	1.0226	1.2068	1.2724	1.0888
6731	Total LCER	Sphingolipid SUM	Lactosylceramides	54669	GC-FID	100010832		1.2776	1.1375	0.823	0.9799	0.5442	0.7355	1.6303	1	1.4937	0.751	0.7632	0.9798	1.141	0.6879	0.4032	1.3919	1.3946	1.1587	1.0106	1.2024	0.9654	1.1594	0.8919	0.9296	0.9163	1.1283	1.2299
6729	Total DCER	Sphingolipid SUM	Dihydroceramides	54670	GC-FID	100010833		0.902	1.0427	0.8564	0.6977	0.9771	0.9959	1.1496	0.7798	1.355	2.4043	1.0117	0.8982	0.9242	0.9018	1.3331	1.0376	1.1831	1.0041	0.7326	1.0899	0.934	1.2233	1.0876	0.9681	1.1522	1.1613	0.8897
7099	PE(18:1/22:0)	Phosphatidylethanolamine	PE Ester	55177	GC-FID	100013437		0.5818	1.0565	0.5818	0.5818	0.5818	0.5818	1.1466	0.8378	0.5818	0.6466	0.5818	0.5818	1.3683	0.5818	0.8973	1.0231	0.5818	1.2247	0.5818	1.1644	0.5818	1.2976	0.9866	0.8839	0.6243	0.5818	1.0856
7976	DCER(22:2)	Sphingolipids	Dihydroceramide	57732	GC-FID	100009952		0.8676	0.8493	1.2511	0.6393	0.7778	0.6758	0.8447	0.6956	1.0228	2.2496	0.9361	1.0061	1.239	1	1.1035	0.8219	0.8447	1.5175	0.6621	1.0289	1.0411	1.172	1.3303	1	1.0898	1.277	0.7047
10586	MAG(12:0)	MAG	Ester	62002	GC-FID	100020128		1.1491	0.9345	0.6473	1	1.0182	0.8473	1.0473	1.1164	0.6473	0.6473	0.6473	0.6473	0.6473	0.6473	0.6473	0.6473	1.1236	1.2655	0.76	0.6473	0.8618	0.9455	0.92	0.6473	0.92	1.2836	0.68
10588	MAG(14:1)	MAG	Ester	62004	GC-FID	100020131		0.9141	1.0388	1.144	1.0997	0.903	0.8975	0.6898	0.8532	1.3047	0.6842	1	0.867	0.7368	0.9889	0.8753	0.9086	1.072	1.2161	1.0499	0.9197	1.2687	0.8089	1.1053	0.9114	1.0499	1.0028	0.6842
10589	MAG(15:0)	MAG	Ester	62005	GC-FID	100020132		1.0519	0.8442	1.0711	0.9281	0.9457	1.7931	1.5974	1.2244	0.9233	1.1669	0.8107	0.988	0.726	1.1366	1.2692	0.6134	1.2356	0.6182	0.7835	0.9728	0.9417	1.0272	0.9337	0.8906	1.1989	1.0615	0.623
10590	MAG(16:0)	MAG	Ester	62006	GC-FID	100020133		0.9262	1.0071	1.2354	1.0305	1.3794	0.9662	0.891	0.911	1.0711	1.3961	1.0875	0.935	1.0632	0.9416	0.9438	0.8652	1.2033	0.8616	0.8034	0.9892	1.0547	0.9538	1.0265	0.8628	1.0453	1.089	0.8813
10591	MAG(16:1)	MAG	Ester	62007	GC-FID	100020134		1.0758	1.0021	0.9958	1.0274	2.1474	0.9789	0.8863	0.9684	1.0695	1.6695	1.2505	0.6232	0.8484	0.9979	1.3242	0.9895	1.3537	0.9789	1.1516	1.2716	0.88	1.0947	0.9432	0.9347	1.0989	1.1074	0.8632
10592	MAG(17:0)	MAG	Ester	62008	GC-FID	100020135		0.8866	0.9656	1.323	0.6942	1.323	0.9141	0.9588	0.9794	0.6701	0.6701	1.189	0.6701	0.7766	0.7732	1.2234	0.8969	1.2852	1.3024	0.6701	0.7938	0.6701	1.0962	1.1718	0.6701	1.0206	0.6701	0.7904
10593	MAG(18:0)	MAG	Ester	62009	GC-FID	100020136		1.0635	0.9269	1.0701	1.0043	1.0842	1.0364	0.9436	1.0961	0.8424	1.0443	0.936	1.1072	0.982	0.8961	1.0301	0.8222	1.1146	0.9608	1.0038	1.0397	0.9922	0.9699	0.7876	0.8961	0.9962	1.1308	0.9697
10594	MAG(18:1)	MAG	Ester	62010	GC-FID	100020137		0.8811	2.5721	1.5802	1.3611	5.3068	1.6716	0.763	1.3893	1.1166	4.2348	1.3172	1.0438	0.9473	1.3314	3.2028	0.5401	1.2883	1.2162	0.9562	0.7073	1.1724	0.734	0.7377	0.7236	0.8826	0.8328	0.5267
10595	MAG(18:2)	MAG	Ester	62011	GC-FID	100020138		0.798	1.3594	2.0107	1.1278	4.4518	1.8434	0.6735	1.1896	0.8607	3.3759	0.9909	0.9324	1.0157	1.5713	2.4815	0.6422	1.0544	1.3833	1.1303	0.6134	1.4889	0.7378	1.0091	0.8697	0.7543	0.9126	0.4171
10596	MAG(18:3)	MAG	Ester	62012	GC-FID	100020139		0.9703	1.1046	0.9548	0.9703	1.0238	0.9191	0.7325	0.7337	1.0404	1.4828	1	0.918	0.9727	0.7491	1.0452	0.9132	0.9263	1.2164	0.742	1.1819	1.0178	1.3734	1.4982	1.1653	1.3329	1.5565	0.8002
10597	MAG(18:4)	MAG	Ester	62013	GC-FID	100020140		0.7394	0.7394	0.7394	0.7394	0.7394	0.7394	0.7394	1	0.7394	0.7394	0.7394	0.7394	0.7394	0.7394	0.7394	0.7394	0.7394	0.7394	0.7394	1.2181	0.7394	0.7394	0.7394	0.7394	0.7394	0.7394	0.7394
10598	MAG(20:0)	MAG	Ester	62014	GC-FID	100020141		0.7345	0.7345	1.2138	0.8586	0.7345	0.8724	1.331	1	0.7345	1.5862	1.0862	1.1069	1.3241	0.8931	0.7414	0.7345	1	0.7345	0.7552	0.7345	0.7345	0.7345	0.7345	0.8586	0.7345	0.8448	0.7345
10599	MAG(20:1)	MAG	Ester	62015	GC-FID	100020142		0.7388	0.7388	1.0784	0.7388	1.3918	0.7388	0.7388	0.8396	1.5149	0.7388	0.7388	1	0.7761	0.7388	1.1903	0.7388	0.7388	0.7388	0.7388	1.0933	0.7388	0.7388	0.7388	0.7388	0.7388	0.7388	0.7388
10600	MAG(20:2)	MAG	Ester	62016	GC-FID	100020143		0.9348	0.6629	0.6629	0.6629	0.7821	0.6629	0.6629	1.2439	1.1955	0.6629	1.1695	0.6629	1.1024	0.6629	0.6629	0.6629	1.2588	0.6629	0.8603	0.6629	0.6629	1.0056	0.6629	0.6629	0.6629	0.6629	0.8156
10601	MAG(20:3)	MAG	Ester	62017	GC-FID	100020144		0.899	0.899	0.899	0.899	0.899	1.0348	0.899	0.899	1	0.899	0.899	0.899	0.899	0.899	0.899	0.899	0.899	0.899	0.899	0.899	0.899	0.899	0.899	0.899	0.899	0.899	0.899
10602	MAG(20:4)	MAG	Ester	62018	GC-FID	100020145		0.6318	0.6318	1.1227	0.6318	1.2274	0.7798	0.6318	0.6318	0.6318	0.6318	0.6318	0.6318	0.6318	0.8917	0.6318	0.6318	0.6318	0.6318	0.6318	0.6318	1.1083	0.6318	0.6318	0.6318	0.6318	0.6318	0.6318
10603	MAG(20:5)	MAG	Ester	62019	GC-FID	100020146		0.9223	1	1.375	0.6723	1.2601	1.027	0.6723	0.6723	1.5912	0.6723	0.6723	1.0068	0.9358	0.9459	1.1014	0.6723	0.9088	0.9223	0.9088	1.2872	0.9696	0.6723	0.6723	0.9426	1.0541	0.6723	0.6723
10604	MAG(22:0)	MAG	Ester	62020	GC-FID	100020147		0.8559	0.8559	0.8559	0.8559	0.8559	0.8559	0.8559	1.0631	0.8559	0.8559	0.8559	0.8559	0.8559	0.8559	0.8559	0.8919	0.8559	0.8559	1.1802	0.8559	0.8559	0.8559	0.8559	0.8559	0.8559	0.8559	1
10605	MAG(22:1)	MAG	Ester	62021	GC-FID	100020148		1.2063	0.6923	1.1154	0.6923	0.6923	0.6923	0.6923	1	1.2238	0.6923	0.8636	0.6923	0.6923	0.958	0.6923	0.6923	0.6923	0.6923	0.7762	1.0699	0.6923	0.6923	0.9685	0.6923	1.3252	0.6923	0.6923
10606	MAG(22:2)	MAG	Ester	62022	GC-FID	100020149		0.9963	1.1086	0.6142	1.0037	0.6142	0.6142	0.6142	0.6142	0.6142	0.6142	0.6142	0.6142	1.1536	0.9438	0.6142	0.9326	0.6142	0.6142	0.9326	1.161	1.176	0.6142	0.6142	0.6142	0.6142	1.3221	0.6142
10607	MAG(22:4)	MAG	Ester	62023	GC-FID	100020150		1.0054	1.088	2.2944	0.7181	0.7217	0.7181	0.8941	0.8905	0.7181	0.7181	0.7181	0.9874	0.9731	1.3321	0.9946	3.0018	0.8941	0.7181	0.7181	1.8312	0.7181	0.7181	0.7181	0.7181	1.1921	0.7181	0.7181
10608	MAG(22:5)	MAG	Ester	62024	GC-FID	100020151		0.7884	1.0581	0.7884	0.7884	0.7884	0.7884	0.7884	0.9502	0.7884	0.7884	0.7884	0.7884	0.7884	0.7884	0.7884	0.7884	0.7884	0.7884	0.7884	0.7884	0.7884	0.7884	0.7884	0.7884	0.7884	0.7884	1.3029
10609	MAG(22:6)	MAG	Ester	62025	GC-FID	100020152		0.8894	0.8681	0.8681	0.8681	0.8936	0.8681	0.8681	1.0043	0.8681	0.8681	0.8681	0.8681	0.8681	0.9957	0.8681	0.8681	0.8681	0.8681	0.8681	1.0426	0.8681	0.8681	0.8681	0.8681	0.8681	0.8681	0.8681
10610	MAG(24:0)	MAG	Ester	62026	GC-FID	100020153		0.7368	0.7368	0.7368	0.7368	1.4368	0.7368	0.7368	0.7368	0.7368	0.7368	0.7368	0.7368	0.7368	1	0.7368	1.0158	0.7368	0.7368	0.7368	0.7368	0.7368	0.7368	0.7368	0.7368	0.7368	0.7368	0.7368
10611	MAG(24:1)	MAG	Ester	62027	GC-FID	100020154		0.9012	1.3542	0.7614	0.7614	0.7614	0.7614	0.7614	0.9398	0.7614	0.7614	0.7614	0.7614	0.7614	1.0602	0.7614	0.7614	0.7614	0.7614	0.7614	0.7614	0.7614	0.7614	0.7614	0.7614	0.7614	0.7614	1.0602
10587	MAG(14:0)	MAG	Ester	62028	GC-FID	100020155		1	0.9508	0.9538	0.8462	1.0862	0.8985	0.7846	0.7446	1.3231	1.4892	1.2092	0.7108	0.9477	0.9415	0.96	0.9846	1.0831	0.7108	0.7108	0.8954	1.2154	1.1138	0.7108	1.1508	1.24	0.7108	1.1046
6739	Total MAG	Neutral Complex Lipids SUM	Monoacylglycerols	62056	GC-FID	100020183		1.0246	1.1682	1.2836	0.9978	1.9021	1.2153	0.8997	1.145	0.9967	1.5279	0.9969	0.9351	0.9889	1.104	1.3386	0.8145	1.1487	0.9268	0.9673	1.0318	1.0341	0.9045	0.873	0.8271	1.0172	1.0022	0.8798

## Sheet: Methods & Notes
	Lipidomics Platform
	The extracts were dried under nitrogen and reconstituted in a dichloromethane:methanol solution containing ammonium acetate. The extracts were transferred to vials for infusion-MS analysis, performed on a Shimadzu LC with nano PEEK tubing and the Sciex SelexIon-5500 QTRAP. The samples were analyzed via both positive and negative mode electrospray. The 5500 QTRAP was operated in MRM mode with a to…
	Sample Preparation
	Plasma and serum: Lipids were extracted from the biofluid in the presence of deuterated internal standards using an automated BUME extraction according to the method of Lofgren et al. (J Lipid Res 2012:53(8):1690-700).
	Other biofluids (not plasma/serum): Lipids were extracted from samples via a modified Bligh-Dyer extraction using methanol/water/dichloromethane in the presence of deuterated internal standards.
	Feces: Samples were lyophilized, weighed, and then ultrasonicated in deionized water. These homogenates were subjected to a modified Bligh-Dyer extraction using methanol/water/dichloromethane in the presence of internal standards.
	Tissue: Samples were weighed and then soaked in 1:1 dichloromethane:methanol overnight at 4°C. The supernatants were subjected to a modified Bligh-Dyer extraction using methanol/water/dichloromethane in the presence of deuterated internal standards.
	Mammalian cells: Samples were homogenized in deionized water. A portion of each homogenate was reserved for Bradford (protein) and/or DNA quantification for normalization purposes. The rest of each homogenate was subjected to a modified Bligh-Dyer extraction using methanol/water/dichloromethane in the presence of internal standards.
	Bacterial/fungal/plant cells: Samples were ultrasonicated in deionized water. A portion of each homogenate was reserved for Bradford (protein) and/or DNA quantification for normalization purposes. The rest of each homogenate was subjected to a modifed Bligh-Dyer extraction using methanol/water/dichloromethane in the presence of internal standards.
		Quality Control Sample Matrix	Median RSD
		Complex Lipid Panel	0.07
	Notes from Genes & Health investigators:
	9 Sep 2019, this is an edited version based on original data file from Metabolon: QMUL-01-19LMCLP+ CLP CLIENT DATA TABLES.XLSX
	Samples 26 and 27 were removed as non British South Asian ethnicity. Sample 28 was removed, which was the same individual as sample 27 on a different day, and used for intra-individual quality control purposes only.
